# Supplementary material
Source: PubMed Central journal article supplement (PMC7317066)
Supplement: NIHMS1575491-supplement-Supp_TableS1.pdf [file NIHMS1575491-supplement-Supp_TableS1.pdf]

Upregulated protein coding genes\_DeSeq2, FDR cutoff, 0.01 Fold difference, 2

| Regulation | Ensembl ID          | log2 Fold Change | Adj.Pval  | Symbol   | Type           | RiboMutINPUT1 | RiboMutINPUT2 | RiboMutINPUT3 | RiboMutINPUT4 | RiboMutIP1 | RiboMutIP2 | RiboMutIP3 | RiboMutIP4 |
|------------|---------------------|------------------|-----------|----------|----------------|---------------|---------------|---------------|---------------|------------|------------|------------|------------|
| Up         | ENSMUSG000000031955 | 4.24             | 0.00E+00  | Ecar1    | protein_coding | 8.18          | 8.15          | 8.40          | 8.20          | 12.42      | 12.39      | 12.50      | 12.50      |
| Up         | ENSMUSG000000007877 | 4.15             | 1.02E-32  | Tcap     | protein_coding | 3.25          | 2.43          | 3.43          | 3.15          | 6.18       | 6.44       | 6.73       | 6.31       |
| Up         | ENSMUSG000000026452 | 4.02             | 9.72E-228 | Sy2      | protein_coding | 7.84          | 7.59          | 7.50          | 7.32          | 11.68      | 11.63      | 11.70      | 11.70      |
| Up         | ENSMUSG000000037771 | 2.94             | 0.00E+00  | Sic3a1   | protein_coding | 7.87          | 7.83          | 7.82          | 7.84          | 11.81      | 11.71      | 11.88      | 11.80      |
| Up         | ENSMUSG000000021680 | 3.91             | 1.14E-122 | Chrbp    | protein_coding | 6.45          | 6.03          | 6.46          | 6.21          | 10.31      | 9.76       | 10.54      | 9.80       |
| Up         | ENSMUSG000000026890 | 3.86             | 0.00E+00  | Lhx6     | protein_coding | 7.19          | 7.06          | 7.00          | 7.19          | 10.96      | 11.03      | 10.90      | 10.83      |
| Up         | ENSMUSG000000049659 | 3.80             | 0.00E+00  | Aftph    | protein_coding | 9.38          | 9.34          | 9.39          | 9.34          | 13.03      | 13.17      | 13.22      | 13.18      |
| Up         | ENSMUSG000000070880 | 3.79             | 1.29E-93  | Gad1     | protein_coding | 10.01         | 9.96          | 9.91          | 9.69          | 13.63      | 13.73      | 13.86      | 13.45      |
| Up         | ENSMUSG000000028971 | 3.77             | 1.13E-42  | Cort     | protein_coding | 4.45          | 4.05          | 4.97          | 4.22          | 7.47       | 7.48       | 8.62       | 7.63       |
| Up         | ENSMUSG000000030785 | 3.72             | 2.03E-83  | Cox6a2   | protein_coding | 4.57          | 4.20          | 5.04          | 4.85          | 8.15       | 7.80       | 8.53       | 8.19       |
| Up         | ENSMUSG000000060735 | 3.70             | 1.82E-108 | Rxfp3    | protein_coding | 5.33          | 4.89          | 5.13          | 5.19          | 8.63       | 8.93       | 8.69       | 8.46       |
| Up         | ENSMUSG00000004366  | 3.69             | 1.28E-41  | Sst      | protein_coding | 10.23         | 9.96          | 10.32         | 10.17         | 13.91      | 13.64      | 14.15      | 13.69      |
| Up         | ENSMUSG000000005716 | 3.68             | 2.95E-56  | Pvalb    | protein_coding | 7.83          | 7.67          | 7.83          | 7.31          | 11.38      | 11.46      | 11.46      | 10.95      |
| Up         | ENSMUSG000000048776 | 3.64             | 3.34E-50  | Pthlh    | protein_coding | 4.03          | 4.13          | 4.20          | 3.74          | 7.01       | 7.36       | 7.31       | 7.48       |
| Up         | ENSMUSG000000027859 | 3.62             | 4.02E-59  | Ngf      | protein_coding | 4.51          | 4.37          | 4.17          | 4.60          | 7.92       | 8.05       | 7.55       | 7.50       |
| Up         | ENSMUSG000000020442 | 3.60             | 3.79E-249 | Btbd11   | protein_coding | 7.19          | 7.18          | 7.14          | 6.79          | 10.69      | 10.76      | 10.66      | 10.45      |
| Up         | ENSMUSG000000061762 | 3.50             | 1.27E-98  | Tac1     | protein_coding | 5.17          | 5.30          | 5.32          | 5.25          | 8.45       | 8.78       | 8.79       | 8.43       |
| Up         | ENSMUSG000000006218 | 3.49             | 1.24E-49  | Fam131c  | protein_coding | 4.29          | 4.13          | 3.84          | 4.28          | 7.41       | 7.31       | 7.34       | 7.13       |
| Up         | ENSMUSG000000046178 | 3.47             | 4.10E-237 | Nxph1    | protein_coding | 7.43          | 7.55          | 7.25          | 7.59          | 10.86      | 11.00      | 10.90      | 10.84      |
| Up         | ENSMUSG000000045246 | 3.46             | 1.78E-52  | Kcng4    | protein_coding | 5.42          | 4.97          | 5.00          | 4.87          | 8.66       | 8.32       | 8.50       | 7.91       |
| Up         | ENSMUSG000000035946 | 3.45             | 1.13E-04  | Gsx2     | protein_coding | 2.16          | 2.16          | 2.93          | 2.59          | 4.56       | 4.47       | 4.77       | 3.89       |
| Up         | ENSMUSG000000021214 | 3.44             | 1.56E-30  | Akr1c18  | protein_coding | 4.45          | 4.20          | 3.63          | 4.22          | 7.44       | 7.24       | 7.25       | 7.06       |
| Up         | ENSMUSG000000003411 | 3.42             | 8.18E-82  | Rab3b    | protein_coding | 7.92          | 7.78          | 8.08          | 7.86          | 11.29      | 11.23      | 11.59      | 11.10      |
| Up         | ENSMUSG000000074622 | 3.34             | 1.90E-153 | Ma1b     | protein_coding | 6.89          | 6.59          | 6.42          | 6.76          | 9.99       | 9.86       | 10.15      | 9.85       |
| Up         | ENSMUSG000000035277 | 3.32             | 1.21E-131 | Arx      | protein_coding | 7.12          | 6.79          | 6.75          | 6.89          | 10.33      | 10.15      | 10.11      | 10.08      |
| Up         | ENSMUSG000000021365 | 3.32             | 9.08E-157 | Nedd9    | protein_coding | 6.51          | 6.34          | 6.84          | 6.48          | 9.84       | 9.74       | 9.81       | 9.87       |
| Up         | ENSMUSG000000045731 | 3.31             | 7.94E-42  | Pnoc     | protein_coding | 4.82          | 5.41          | 5.57          | 5.37          | 8.44       | 8.35       | 8.84       | 8.26       |
| Up         | ENSMUSG000000024990 | 3.29             | 1.13E-58  | Rbp4     | protein_coding | 5.21          | 5.44          | 4.68          | 5.30          | 8.21       | 8.71       | 8.11       | 8.14       |
| Up         | ENSMUSG000000028594 | 3.28             | 1.59E-32  | Lrrc38   | protein_coding | 4.39          | 3.63          | 3.80          | 3.90          | 7.04       | 6.56       | 7.00       | 6.81       |
| Up         | ENSMUSG000000029419 | 3.26             | 0.00E+00  | E2f4     | protein_coding | 9.26          | 9.20          | 9.30          | 9.25          | 12.52      | 12.57      | 12.37      | 12.37      |
| Up         | ENSMUSG000000026333 | 3.25             | 1.54E-25  | Shh      | protein_coding | 3.81          | 3.11          | 3.65          | 3.50          | 6.84       | 6.53       | 6.40       | 6.20       |
| Up         | ENSMUSG000000031543 | 3.25             | 3.12E-199 | Ank1     | protein_coding | 8.70          | 8.83          | 8.68          | 8.55          | 12.05      | 11.88      | 12.11      | 11.63      |
| Up         | ENSMUSG000000010066 | 3.18             | 4.40E-117 | Cacna2d2 | protein_coding | 7.45          | 7.68          | 7.05          | 7.37          | 10.65      | 10.66      | 10.44      | 10.46      |
| Up         | ENSMUSG000000018470 | 3.17             | 3.29E-222 | Kcnab3   | protein_coding | 7.28          | 7.09          | 7.22          | 6.87          | 10.35      | 10.27      | 10.31      | 10.06      |
| Up         | ENSMUSG000000069132 | 3.16             | 1.72E-24  | Nxph2    | protein_coding | 4.22          | 3.83          | 4.09          | 4.15          | 6.69       | 6.69       | 6.29       | 7.35       |
| Up         | ENSMUSG000000068615 | 3.16             | 5.35E-66  | Gjd2     | protein_coding | 4.91          | 4.77          | 5.00          | 5.31          | 7.82       | 7.92       | 8.30       | 7.95       |
| Up         | ENSMUSG000000031932 | 3.14             | 1.22E-87  | Gpr83    | protein_coding | 6.48          | 6.03          | 6.52          | 6.21          | 9.17       | 9.34       | 9.16       | 8.93       |
| Up         | ENSMUSG000000050511 | 3.11             | 8.75E-136 | Oprd1    | protein_coding | 6.51          | 5.99          | 6.27          | 6.24          | 9.26       | 9.43       | 9.40       | 9.13       |
| Up         | ENSMUSG000000026787 | 3.10             | 3.13E-203 | Gad2     | protein_coding | 9.82          | 9.79          | 9.54          | 9.78          | 12.73      | 12.88      | 13.00      | 12.67      |
| Up         | ENSMUSG000000030098 | 3.06             | 4.28E-99  | Grip2    | protein_coding | 6.08          | 6.01          | 6.14          | 6.29          | 8.96       | 9.27       | 9.29       | 8.93       |
| Up         | ENSMUSG000000020000 | 3.05             | 3.39E-77  | Moxd1    | protein_coding | 5.42          | 5.04          | 5.44          | 5.67          | 8.35       | 8.28       | 8.14       | 8.14       |
| Up         | ENSMUSG000000034324 | 3.02             | 2.50E-43  | Tmem132c | protein_coding | 5.83          | 5.72          | 5.59          | 5.91          | 8.57       | 8.80       | 8.78       | 8.60       |
| Up         | ENSMUSG000000026819 | 3.01             | 3.10E-16  | Npy      | protein_coding | 7.69          | 7.34          | 8.10          | 7.63          | 10.69      | 10.21      | 11.25      | 10.33      |
| Up         | ENSMUSG000000020814 | 2.99             | 9.51E-181 | Mxra7    | protein_coding | 6.99          | 6.71          | 6.86          | 6.83          | 9.84       | 9.89       | 9.88       | 9.63       |
| Up         | ENSMUSG000000068220 | 2.99             | 1.05E-39  | Lgals1   | protein_coding | 5.21          | 4.56          | 5.40          | 5.37          | 8.08       | 7.63       | 8.49       | 7.71       |
| Up         | ENSMUSG000000038319 | 2.98             | 1.50E-150 | Kcnh2    | protein_coding | 6.92          | 6.89          | 6.96          | 6.92          | 9.98       | 9.86       | 10.05      | 9.76       |
| Up         | ENSMUSG000000062309 | 2.97             | 4.86E-70  | Rpp25    | protein_coding | 5.60          | 5.80          | 5.63          | 5.66          | 8.53       | 8.61       | 8.61       | 8.38       |
| Up         | ENSMUSG000000023391 | 2.95             | 1.66E-25  | Dlx2     | protein_coding | 4.84          | 5.17          | 4.49          | 5.34          | 7.74       | 7.87       | 7.81       | 7.81       |
| Up         | ENSMUSG000000030310 | 2.93             | 0.00E+00  | Sic6a1   | protein_coding | 10.04         | 10.05         | 10.07         | 10.01         | 12.88      | 13.03      | 13.06      | 12.87      |
| Up         | ENSMUSG000000018126 | 2.89             | 2.07E-20  | Baiap2l2 | protein_coding | 3.61          | 3.73          | 3.89          | 3.82          | 5.81       | 6.30       | 6.70       | 5.88       |
| Up         | ENSMUSG000000062694 | 2.89             | 2.50E-04  | Cav3     | protein_coding | 2.65          | 3.26          | 2.00          | 3.21          | 4.56       | 4.89       | 5.40       | 4.27       |
| Up         | ENSMUSG000000050830 | 2.87             | 1.15E-63  | Vwc2     | protein_coding | 5.81          | 5.59          | 5.75          | 5.42          | 8.41       | 8.33       | 8.67       | 8.13       |
| Up         | ENSMUSG000000033453 | 2.86             | 1.13E-78  | Adamts15 | protein_coding | 5.08          | 4.93          | 5.31          | 5.35          | 7.89       | 7.72       | 8.12       | 7.84       |
| Up         | ENSMUSG000000001496 | 2.85             | 2.00E-26  | Nix2-1   | protein_coding | 4.29          | 4.13          | 4.43          | 4.48          | 7.20       | 6.54       | 6.74       | 7.12       |
| Up         | ENSMUSG000000033278 | 2.85             | 3.27E-131 | Ptprm    | protein_coding | 6.93          | 7.46          | 7.29          | 6.96          | 9.97       | 10.01      | 10.20      | 9.77       |
| Up         | ENSMUSG000000045034 | 2.82             | 3.35E-232 | Ankrd34b | protein_coding | 7.65          | 7.59          | 7.39          | 7.61          | 10.30      | 10.45      | 10.36      | 10.32      |
| Up         | ENSMUSG000000035681 | 2.82             | 0.00E+00  | Kcnc2    | protein_coding | 9.43          | 9.30          | 9.34          | 9.35          | 12.11      | 12.26      | 12.17      | 12.10      |
| Up         | ENSMUSG000000021613 | 2.81             | 9.44E-130 | Hapln1   | protein_coding | 7.43          | 7.44          | 7.62          | 7.81          | 10.16      | 10.46      | 10.45      | 10.40      |
| Up         | ENSMUSG000000020396 | 2.80             | 5.24E-123 | Nefh     | protein_coding | 8.92          | 8.86          | 8.98          | 8.69          | 11.87      | 11.62      | 11.76      | 11.32      |
| Up         | ENSMUSG000000029754 | 2.79             | 1.72E-43  | Dlx6     | protein_coding | 5.08          | 5.68          | 5.53          | 5.86          | 8.23       | 8.50       | 8.08       | 8.14       |
| Up         | ENSMUSG000000047344 | 2.77             | 4.74E-30  | Land3    | protein_coding | 5.15          | 5.63          | 6.03          | 5.24          | 8.04       | 8.53       | 8.12       | 8.14       |
| Up         | ENSMUSG000000037653 | 2.77             | 9.59E-45  | Kctd8    | protein_coding | 5.12          | 5.60          | 5.94          | 5.75          | 8.32       | 8.32       | 8.43       | 8.12       |
| Up         | ENSMUSG000000032020 | 2.76             | 1.18E-202 | Ubash3b  | protein_coding | 7.89          | 7.72          | 7.96          | 7.82          | 10.67      | 10.52      | 10.72      | 10.43      |
| Up         | ENSMUSG000000068859 | 2.75             | 3.58E-21  | Sp9      | protein_coding | 5.87          | 6.31          | 5.70          | 6.39          | 8.60       | 8.78       | 8.80       | 8.91       |
| Up         | ENSMUSG000000048988 | 2.75             | 2.03E-124 | Elf1     | protein_coding | 8.08          | 7.79          | 7.71          | 7.85          | 10.73      | 10.50      | 10.63      | 10.46      |
| Up         | ENSMUSG000000053626 | 2.74             | 7.94E-43  | Tll1     | protein_coding | 5.26          | 5.75          | 6.00          | 5.73          | 8.35       | 8.20       | 8.73       | 8.01       |
| Up         | ENSMUSG000000043673 | 2.73             | 2.43E-85  | Kcnc3    | protein_coding | 6.34          | 6.33          | 6.73          | 6.19          | 9.21       | 9.00       | 9.18       | 8.93       |
| Up         | ENSMUSG000000029755 | 2.73             | 1.34E-27  | Dlx5     | protein_coding | 4.87          | 5.63          | 5.04          | 5.58          | 7.84       | 8.29       | 7.65       | 7.80       |
| Up         | ENSMUSG000000031994 | 2.72             | 6.43E-38  | Adamts8  | protein_coding | 5.50          | 5.12          | 5.17          | 5.22          | 7.27       | 8.07       | 7.88       | 8.04       |
| Up         | ENSMUSG000000039966 | 2.69             | 3.95E-33  | Crt      | protein_coding | 6.86          | 4.56          | 6.73          | 6.78          | 9.79       | 6.78       | 6.84       | 6.88       |
| Up         | ENSMUSG000000098606 | 2.67             | 1.19E-38  | Tptgl    | protein_coding | 5.19          | 5.21          | 5.57          | 5.42          | 7.68       | 7.78       | 8.15       | 7.98       |
| Up         | ENSMUSG000000031772 | 2.65             | 5.82E-124 | Cntnap4  | protein_coding | 7.41          | 7.61          | 7.37          | 7.57          | 10.17      | 9.96       | 10.27      | 10.01      |
| Up         | ENSMUSG000000038370 | 2.63             | 2.91E-40  | Pcp4l1   | protein_coding | 8.38          | 8.27          | 8.06          | 8.65          | 11.07      | 11.09      | 11.00      | 10.73      |
| Up         | ENSMUSG000000020810 | 2.62             | 2.59E-205 | Cygb     | protein_coding | 8.31          | 8.34          | 8.21          | 8.28          | 10.98      | 10.92      | 10.89      | 10.79      |
| Up         | ENSMUSG000000011148 | 2.61             | 6.38E-80  | Adssl1   | protein_coding | 6.13          | 5.67          | 5.92          | 6.16          | 8.50       | 8.54       | 8.55       | 8.49       |
| Up         | ENSMUSG000000038068 | 2.61             | 1.70E-156 | Rnf144b  | protein_coding | 6.66          | 6.67          | 6.52          | 6.74          | 9.07       | 9.32       | 9.26       | 9.19       |
| Up         | ENSMUSG000000029875 | 2.61             | 8.41E-85  | Ccdc184  | protein_coding | 6.81          | 6.75          | 6.22          | 6.27          | 9.21       | 9.21       | 9.02       | 8.90       |
| Up         | ENSMUSG000000037610 | 2.61             | 1.84E-21  | Kcnmb2   | protein_coding | 5.42          | 5.53          | 5.60          | 5.59          | 8.21       | 8.21       | 8.27       | 7.97       |
| Up         | ENSMUSG000000038766 | 2.61             | 2.31E-143 | Dner     | protein_coding | 8.72          | 8.65          | 8.62          | 8.82          | 11.21      | 11.36      | 11.45      | 11.16      |
| Up         | ENSMUSG000000005052 | 2.61             | 3.07E-274 | Zfp385a  | protein_coding | 8.34          | 8.22          | 8.24          | 8.18          | 10.88      | 10.94      | 10.86      | 10.64      |
| Up         | ENSMUSG000000055471 | 2.60             | 1.50E-47  | Alk      | protein_coding | 5.34          | 5.59          | 5.78          | 5.16          | 8.14       | 8.14       | 7.90       | 7.60       |
| Up         | ENSMUSG000000020610 | 2.60             | 5.20E-194 | Esrng    | protein_coding | 7.37          | 7.32          | 7.47          | 7.64          | 9.90       | 10.17      | 10.02      | 10.02      |
| Up         | ENSMUSG000000019878 | 2.59             | 1.01E-113 | Hsf2     | protein_coding | 7.16          | 7.20          | 7.21          | 7.46          | 9.79       | 9.82       | 9.79       | 9.82       |
| Up         | ENSMUSG000000027820 | 2.59             | 9.56E-47  | Mme      | protein_coding | 6.25          | 6.52          | 6.59          | 6.28          | 8.70       | 8.62       | 8.67       | 8.59       |
| Up         | ENSMUSG000000028023 | 2.58             | 3.28E-12  | Cdk15    | protein_coding | 4.32          |               |               |               |            |            |            |            |

|    |                     |      |           |          |                |       |       |       |       |       |       |       |       |
|----|---------------------|------|-----------|----------|----------------|-------|-------|-------|-------|-------|-------|-------|-------|
| Up | ENSMUSG00000033063  | 2.55 | 1.25E-71  | Cntnap3  | protein_coding | 5.79  | 5.82  | 5.48  | 5.99  | 8.06  | 8.37  | 8.13  | 8.60  |
| Up | ENSMUSG00000053216  | 2.55 | 1.83E-20  | Btn2a2   | protein_coding | 4.15  | 4.01  | 4.01  | 3.98  | 6.51  | 5.82  | 6.33  | 6.31  |
| Up | ENSMUSG00000055435  | 2.55 | 2.76E-146 | Maf      | protein_coding | 7.54  | 7.37  | 7.44  | 7.64  | 10.20 | 10.09 | 9.95  | 9.82  |
| Up | ENSMUSG00000026765  | 2.54 | 9.61E-23  | Lypd6b   | protein_coding | 5.44  | 5.41  | 5.55  | 5.75  | 7.90  | 7.89  | 8.30  | 7.76  |
| Up | ENSMUSG00000032271  | 2.53 | 8.19E-08  | Nnmt     | protein_coding | 2.94  | 2.95  | 2.74  | 3.15  | 4.82  | 4.76  | 4.45  | 4.68  |
| Up | ENSMUSG00000046997  | 2.48 | 3.51E-32  | Spsb4    | protein_coding | 4.62  | 4.84  | 4.43  | 4.91  | 7.08  | 6.67  | 7.14  | 7.05  |
| Up | ENSMUSG00000032864  | 2.47 | 5.95E-33  | Tpm2     | protein_coding | 5.06  | 4.93  | 4.79  | 4.96  | 7.46  | 7.36  | 7.19  | 6.92  |
| Up | ENSMUSG00000020836  | 2.47 | 5.73E-31  | Coro6    | protein_coding | 5.44  | 5.66  | 5.66  | 5.37  | 8.82  | 7.50  | 8.11  | 7.68  |
| Up | ENSMUSG00000025207  | 2.46 | 3.77E-107 | Sema4g   | protein_coding | 6.92  | 6.96  | 6.77  | 7.02  | 9.37  | 9.39  | 9.46  | 9.09  |
| Up | ENSMUSG00000046546  | 2.46 | 2.20E-89  | Fam43a   | protein_coding | 6.19  | 6.05  | 6.24  | 6.11  | 8.61  | 8.51  | 8.61  | 8.41  |
| Up | ENSMUSG00000050711  | 2.44 | 2.25E-43  | Scg2     | protein_coding | 9.24  | 9.19  | 9.40  | 8.99  | 11.62 | 11.35 | 12.04 | 11.45 |
| Up | ENSMUSG00000021194  | 2.44 | 8.32E-171 | Chga     | protein_coding | 9.30  | 9.39  | 9.20  | 9.12  | 11.74 | 11.62 | 11.86 | 11.51 |
| Up | ENSMUSG00000017493  | 2.43 | 4.75E-138 | Igf1bp4  | protein_coding | 8.92  | 8.53  | 8.91  | 8.69  | 11.36 | 11.17 | 11.07 | 11.15 |
| Up | ENSMUSG00000096914  | 2.42 | 1.67E-105 | Galnt16  | protein_coding | 7.80  | 7.96  | 7.87  | 7.64  | 10.06 | 10.34 | 10.34 | 10.14 |
| Up | ENSMUSG00000050447  | 2.42 | 1.16E-92  | Lypd6    | protein_coding | 7.24  | 7.20  | 7.37  | 7.62  | 9.67  | 9.73  | 9.88  | 9.72  |
| Up | ENSMUSG00000002771  | 2.41 | 1.38E-131 | Grin2d   | protein_coding | 7.38  | 7.13  | 7.14  | 7.03  | 9.51  | 9.72  | 9.53  | 9.40  |
| Up | ENSMUSG00000008318  | 2.40 | 1.77E-37  | Relt     | protein_coding | 5.57  | 5.28  | 5.91  | 5.20  | 7.70  | 8.03  | 7.61  | 7.85  |
| Up | ENSMUSG00000029054  | 2.39 | 1.45E-46  | Gabrd    | protein_coding | 5.94  | 6.06  | 6.56  | 5.88  | 8.47  | 8.42  | 8.75  | 8.13  |
| Up | ENSMUSG00000039601  | 2.39 | 5.33E-222 | Rcan2    | protein_coding | 10.17 | 10.18 | 10.01 | 9.92  | 12.52 | 12.39 | 12.60 | 12.33 |
| Up | ENSMUSG00000079694  | 2.39 | 4.07E-07  | Gm14862  | protein_coding | 3.38  | 3.03  | 4.17  | 3.50  | 5.22  | 5.81  | 5.39  | 5.58  |
| Up | ENSMUSG00000039384  | 2.39 | 3.31E-55  | Dusp10   | protein_coding | 5.82  | 5.93  | 5.59  | 5.38  | 8.14  | 8.10  | 8.02  | 7.66  |
| Up | ENSMUSG00000025892  | 2.38 | 1.60E-221 | Gria4    | protein_coding | 8.84  | 9.15  | 8.69  | 8.96  | 11.24 | 11.37 | 11.32 | 11.23 |
| Up | ENSMUSG00000074607  | 2.38 | 1.30E-162 | Tox2     | protein_coding | 7.76  | 7.70  | 7.55  | 7.67  | 10.06 | 10.07 | 10.08 | 9.98  |
| Up | ENSMUSG00000030137  | 2.38 | 1.46E-45  | Tuba8    | protein_coding | 5.97  | 5.98  | 6.05  | 5.70  | 8.21  | 8.31  | 8.36  | 8.00  |
| Up | ENSMUSG00000044834  | 2.38 | 6.80E-211 | Vstm2a   | protein_coding | 9.49  | 9.50  | 9.40  | 9.62  | 11.82 | 11.89 | 11.94 | 11.84 |
| Up | ENSMUSG00000030790  | 2.37 | 8.10E-08  | Adm      | protein_coding | 2.94  | 3.97  | 3.60  | 3.65  | 5.67  | 5.67  | 5.11  | 5.47  |
| Up | ENSMUSG00000022935  | 2.37 | 1.37E-102 | Grik1    | protein_coding | 6.88  | 6.93  | 7.02  | 7.11  | 9.08  | 9.38  | 9.38  | 9.41  |
| Up | ENSMUSG00000029516  | 2.36 | 8.60E-178 | Cit      | protein_coding | 9.75  | 9.71  | 9.62  | 9.58  | 12.12 | 12.06 | 12.04 | 11.86 |
| Up | ENSMUSG00000031841  | 2.36 | 1.26E-150 | Cdh13    | protein_coding | 7.95  | 7.83  | 7.88  | 8.14  | 10.23 | 10.49 | 10.26 | 10.20 |
| Up | ENSMUSG00000026393  | 2.36 | 5.21E-130 | Nek7     | protein_coding | 8.36  | 8.37  | 8.46  | 8.50  | 10.73 | 10.57 | 11.06 | 10.67 |
| Up | ENSMUSG00000027834  | 2.35 | 2.07E-139 | Serpini1 | protein_coding | 9.79  | 9.96  | 9.68  | 9.97  | 12.16 | 12.26 | 12.29 | 12.07 |
| Up | ENSMUSG000000448616 | 2.35 | 1.69E-23  | Nog      | protein_coding | 5.02  | 4.79  | 4.91  | 5.07  | 7.25  | 6.93  | 7.43  | 6.89  |
| Up | ENSMUSG00000033615  | 2.34 | 4.45E-109 | Cptx1    | protein_coding | 11.82 | 11.81 | 11.81 | 11.63 | 14.23 | 14.20 | 13.94 | 13.94 |
| Up | ENSMUSG00000043822  | 2.34 | 2.78E-29  | Adamts5  | protein_coding | 5.34  | 5.35  | 5.28  | 5.04  | 7.28  | 7.40  | 7.43  | 7.00  |
| Up | ENSMUSG00000041911  | 2.34 | 9.14E-92  | Dlx1     | protein_coding | 8.13  | 8.09  | 8.02  | 8.14  | 10.42 | 10.40 | 10.50 | 10.35 |
| Up | ENSMUSG00000006270  | 2.33 | 2.66E-05  | Vax1     | protein_coding | 3.25  | 2.66  | 3.25  | 2.94  | 4.59  | 3.80  | 4.75  | 4.17  |
| Up | ENSMUSG00000039057  | 2.33 | 1.41E-58  | Myo16    | protein_coding | 7.77  | 7.72  | 7.69  | 7.67  | 9.87  | 10.09 | 10.23 | 9.95  |
| Up | ENSMUSG00000043648  | 2.32 | 2.62E-06  | Pld6     | protein_coding | 2.43  | 2.66  | 3.01  | 3.01  | 4.68  | 4.68  | 3.67  | 4.08  |
| Up | ENSMUSG00000040133  | 2.32 | 1.08E-84  | Gpr176   | protein_coding | 6.92  | 6.38  | 6.67  | 6.66  | 8.95  | 8.97  | 8.98  | 8.88  |
| Up | ENSMUSG00000027996  | 2.31 | 6.28E-09  | Sfrp2    | protein_coding | 3.44  | 3.88  | 4.52  | 4.19  | 5.79  | 6.66  | 5.71  | 5.86  |
| Up | ENSMUSG00000039252  | 2.30 | 3.45E-126 | Lgi2     | protein_coding | 8.91  | 9.04  | 9.09  | 8.84  | 11.16 | 11.21 | 11.58 | 11.06 |
| Up | ENSMUSG00000054204  | 2.30 | 2.92E-13  | Alkal2   | protein_coding | 5.04  | 4.56  | 4.65  | 4.39  | 6.70  | 6.50  | 7.31  | 6.48  |
| Up | ENSMUSG00000030337  | 2.30 | 5.77E-110 | Vamp1    | protein_coding | 8.70  | 8.69  | 8.88  | 8.71  | 11.05 | 11.03 | 11.22 | 10.83 |
| Up | ENSMUSG00000062252  | 2.27 | 2.97E-12  | Lhfp15   | protein_coding | 4.11  | 3.52  | 3.93  | 4.09  | 5.66  | 6.44  | 5.67  | 5.46  |
| Up | ENSMUSG00000043668  | 2.26 | 8.80E-43  | Tox3     | protein_coding | 6.30  | 6.26  | 6.31  | 6.43  | 8.33  | 8.75  | 8.61  | 8.41  |
| Up | ENSMUSG00000035891  | 2.26 | 1.29E-149 | CerK     | protein_coding | 8.66  | 8.74  | 8.65  | 8.50  | 10.92 | 10.94 | 11.00 | 10.67 |
| Up | ENSMUSG00000057890  | 2.25 | 2.18E-221 | Abat     | protein_coding | 9.98  | 9.95  | 9.73  | 9.86  | 12.13 | 12.20 | 12.18 | 12.00 |
| Up | ENSMUSG00000049866  | 2.25 | 1.05E-122 | Arl4c    | protein_coding | 8.40  | 8.44  | 8.37  | 8.37  | 10.49 | 10.73 | 10.71 | 10.58 |
| Up | ENSMUSG00000022558  | 2.23 | 1.04E-79  | Mroh1    | protein_coding | 7.61  | 7.52  | 7.49  | 7.59  | 9.85  | 9.74  | 9.93  | 9.48  |
| Up | ENSMUSG00000034993  | 2.22 | 3.50E-83  | Vat1     | protein_coding | 6.61  | 6.66  | 6.38  | 6.83  | 8.76  | 8.75  | 8.98  | 8.72  |
| Up | ENSMUSG00000034773  | 2.21 | 2.08E-03  | BC030867 | protein_coding | 2.65  | 2.95  | 3.01  | 3.21  | 4.16  | 3.65  | 5.14  | 4.43  |
| Up | ENSMUSG00000029769  | 2.21 | 1.59E-150 | Ccdc136  | protein_coding | 9.13  | 9.16  | 9.17  | 9.06  | 11.41 | 11.18 | 11.51 | 11.23 |
| Up | ENSMUSG00000020891  | 2.21 | 3.21E-17  | Alox8    | protein_coding | 5.31  | 5.02  | 5.78  | 5.34  | 7.40  | 7.37  | 7.82  | 7.30  |
| Up | ENSMUSG00000049985  | 2.21 | 3.08E-26  | Ankrd55  | protein_coding | 4.84  | 5.52  | 5.42  | 5.42  | 7.45  | 7.23  | 7.10  | 7.22  |
| Up | ENSMUSG00000043670  | 2.20 | 3.33E-155 | Diras1   | protein_coding | 9.15  | 9.15  | 9.08  | 9.05  | 11.28 | 11.33 | 11.42 | 11.14 |
| Up | ENSMUSG00000042761  | 2.20 | 1.48E-15  | Mrap2    | protein_coding | 4.77  | 4.27  | 5.07  | 4.67  | 6.43  | 6.90  | 6.37  | 7.12  |
| Up | ENSMUSG00000047959  | 2.19 | 2.66E-53  | Kcna3    | protein_coding | 6.06  | 6.09  | 6.39  | 6.23  | 8.47  | 8.24  | 8.24  | 8.24  |
| Up | ENSMUSG00000034570  | 2.18 | 2.61E-27  | Inpp5j   | protein_coding | 7.65  | 7.73  | 7.94  | 7.52  | 9.92  | 10.03 | 9.76  | 9.78  |
| Up | ENSMUSG00000034728  | 2.18 | 2.64E-105 | Pf1c3d3  | protein_coding | 6.84  | 6.76  | 6.69  | 6.75  | 8.91  | 8.92  | 8.93  | 8.62  |
| Up | ENSMUSG00000043456  | 2.18 | 4.20E-220 | Zfp536   | protein_coding | 8.53  | 8.43  | 8.43  | 8.47  | 10.74 | 10.58 | 10.51 | 10.51 |
| Up | ENSMUSG00000036817  | 2.18 | 2.43E-180 | Eih4     | protein_coding | 9.96  | 10.14 | 10.12 | 10.00 | 12.18 | 12.25 | 12.28 | 12.22 |
| Up | ENSMUSG00000049265  | 2.17 | 1.85E-80  | Kcnk3    | protein_coding | 6.68  | 6.71  | 6.75  | 6.55  | 8.85  | 8.77  | 8.88  | 8.71  |
| Up | ENSMUSG00000021647  | 2.17 | 2.75E-16  | Carpt1   | protein_coding | 3.99  | 4.61  | 4.65  | 4.96  | 6.10  | 6.68  | 6.47  | 6.92  |
| Up | ENSMUSG00000005447  | 2.17 | 5.25E-20  | Pafah1b3 | protein_coding | 4.59  | 4.31  | 3.80  | 4.60  | 6.39  | 6.17  | 6.40  | 6.20  |
| Up | ENSMUSG00000032033  | 2.17 | 4.14E-12  | Barx2    | protein_coding | 4.07  | 4.17  | 3.75  | 3.86  | 5.82  | 5.58  | 5.63  | 6.17  |
| Up | ENSMUSG00000028373  | 2.16 | 6.33E-119 | Astn2    | protein_coding | 7.34  | 7.36  | 7.45  | 7.35  | 9.39  | 9.48  | 9.79  | 9.33  |
| Up | ENSMUSG00000020019  | 2.15 | 1.90E-30  | Ntn4     | protein_coding | 5.65  | 5.60  | 5.31  | 5.53  | 7.44  | 7.99  | 7.30  | 7.47  |
| Up | ENSMUSG000000064179 | 2.15 | 2.20E-08  | Tnnt1    | protein_coding | 5.58  | 4.44  | 4.30  | 4.12  | 6.65  | 6.47  | 7.07  | 6.56  |
| Up | ENSMUSG00000029560  | 2.13 | 4.90E-32  | Snx8     | protein_coding | 5.10  | 5.10  | 5.67  | 5.72  | 7.15  | 7.49  | 7.54  | 7.61  |
| Up | ENSMUSG00000075270  | 2.12 | 1.03E-40  | Pde11a   | protein_coding | 6.77  | 6.97  | 7.24  | 6.78  | 8.92  | 9.21  | 8.96  | 9.04  |
| Up | ENSMUSG00000035407  | 2.12 | 7.31E-22  | Kank4    | protein_coding | 5.60  | 5.38  | 4.93  | 5.00  | 7.40  | 6.95  | 7.29  | 7.32  |
| Up | ENSMUSG00000034728  | 2.11 | 1.97E-45  | Vgf      | protein_coding | 8.70  | 8.64  | 8.94  | 8.48  | 10.77 | 10.63 | 11.29 | 10.34 |
| Up | ENSMUSG00000025044  | 2.11 | 3.81E-93  | Slc3a3r2 | protein_coding | 6.82  | 6.83  | 6.74  | 6.79  | 8.97  | 8.90  | 8.87  | 8.82  |
| Up | ENSMUSG00000029674  | 2.11 | 4.65E-138 | Limk1    | protein_coding | 8.59  | 8.66  | 8.62  | 8.51  | 10.76 | 10.72 | 10.77 | 10.42 |
| Up | ENSMUSG00000042589  | 2.11 | 8.19E-98  | Cux2     | protein_coding | 8.22  | 8.39  | 8.24  | 8.42  | 10.30 | 10.52 | 10.53 | 10.28 |
| Up | ENSMUSG00000031139  | 2.10 | 4.57E-29  | Mcf2     | protein_coding | 5.23  | 4.79  | 5.45  | 5.41  | 7.26  | 7.33  | 7.37  | 6.90  |
| Up | ENSMUSG00000021255  | 2.10 | 6.01E-09  | Esrrb    | protein_coding | 4.77  | 3.83  | 3.75  | 4.53  | 6.40  | 6.21  | 6.47  | 6.18  |
| Up | ENSMUSG00000059493  | 2.10 | 6.92E-24  | Nhs      | protein_coding | 5.85  | 5.97  | 5.43  | 6.17  | 7.66  | 8.13  | 7.71  | 8.04  |
| Up | ENSMUSG00000045613  | 2.08 | 3.12E-40  | Chrm2    | protein_coding | 6.67  | 6.62  | 6.40  | 6.61  | 8.61  | 8.64  | 8.71  | 8.50  |
| Up | ENSMUSG00000018339  | 2.08 | 1.09E-28  | Gpx3     | protein_coding | 5.70  | 5.87  | 5.52  | 5.81  | 7.32  | 8.04  | 7.59  | 7.86  |
| Up | ENSMUSG00000055430  | 2.08 | 9.44E-178 | Nap115   | protein_coding | 10.91 | 10.89 | 10.83 | 11.02 | 13.04 | 12.96 | 12.97 | 13.01 |
| Up | ENSMUSG00000029822  | 2.08 | 1.15E-86  | Osbpl3   | protein_coding | 6.99  | 6.79  | 6.97  | 6.91  | 9.14  | 8.98  | 8.82  | 8.89  |
| Up | ENSMUSG00000030607  | 2.08 | 3.47E-10  | Acan     | protein_coding | 5.17  | 4.84  | 5.27  | 5.19  | 7.35  | 7.26  | 6.96  | 6.19  |
| Up | ENSMUSG00000070287  | 2.08 | 7.75E-55  | Slc35g2  | protein_coding | 6.10  | 5.96  | 6.02  | 5.88  | 7.96  | 8.02  | 8.11  | 7.88  |
| Up | ENSMUSG000000064329 | 2.08 | 1.41E-152 | Scn1a    | protein_coding | 9.64  | 9.51  | 9.70  | 9.44  | 11.62 | 11.61 | 11.79 | 11.57 |
| Up | ENSMUSG00000054196  | 2.08 | 4.56E-19  | Cthrc1   | protein_coding | 4.48  | 4.86  | 4.34  | 4.87  | 6.53  | 6.64  | 6.16  | 6.78  |
| Up | ENSMUSG00000045932  | 2.07 | 7.30E-68  | Ifi2     | protein_coding |       |       |       |       |       |       |       |       |

|    |                    |      |           |               |                |       |       |       |       |       |       |       |       |
|----|--------------------|------|-----------|---------------|----------------|-------|-------|-------|-------|-------|-------|-------|-------|
| Up | ENSMUSG00000030246 | 2.05 | 1.46E-113 | Ldhd          | protein_coding | 10.28 | 10.14 | 10.14 | 10.02 | 12.15 | 12.29 | 12.27 | 12.04 |
| Up | ENSMUSG00000038486 | 2.04 | 2.67E-150 | Sv2a          | protein_coding | 10.62 | 10.52 | 10.55 | 10.35 | 12.56 | 12.47 | 12.74 | 12.40 |
| Up | ENSMUSG00000029228 | 2.04 | 4.80E-88  | Lnx1          | protein_coding | 6.87  | 7.02  | 7.11  | 7.25  | 8.89  | 9.14  | 9.22  | 9.05  |
| Up | ENSMUSG00000063626 | 2.04 | 1.42E-63  | Unc5d         | protein_coding | 7.81  | 8.10  | 7.98  | 8.46  | 9.92  | 10.25 | 10.20 | 10.15 |
| Up | ENSMUSG00000010803 | 2.04 | 7.82E-134 | Gabra1        | protein_coding | 10.85 | 10.93 | 10.84 | 10.83 | 12.93 | 12.86 | 13.06 | 12.73 |
| Up | ENSMUSG00000039154 | 2.04 | 3.29E-25  | Shd           | protein_coding | 6.43  | 6.40  | 6.77  | 6.27  | 8.20  | 8.57  | 8.70  | 8.54  |
| Up | ENSMUSG00000016664 | 2.04 | 5.99E-78  | Pacsl1        | protein_coding | 8.54  | 8.40  | 8.20  | 8.37  | 10.56 | 10.30 | 10.59 | 10.12 |
| Up | ENSMUSG00000038172 | 2.02 | 8.61E-93  | Tlc39b        | protein_coding | 8.39  | 8.47  | 8.16  | 8.31  | 10.24 | 10.37 | 10.60 | 10.14 |
| Up | ENSMUSG00000037892 | 2.02 | 3.71E-22  | Pcdh18        | protein_coding | 4.72  | 4.72  | 4.63  | 5.16  | 6.60  | 6.79  | 6.57  | 6.75  |
| Up | ENSMUSG00000058897 | 2.02 | 2.34E-90  | Col25a1       | protein_coding | 8.17  | 8.07  | 8.27  | 8.21  | 10.10 | 10.08 | 10.41 | 10.12 |
| Up | ENSMUSG00000032625 | 2.01 | 2.24E-117 | Thsd7a        | protein_coding | 8.77  | 8.59  | 8.57  | 8.65  | 10.60 | 10.60 | 10.77 | 10.62 |
| Up | ENSMUSG00000030268 | 2.01 | 1.56E-251 | Bcat1         | protein_coding | 9.15  | 9.13  | 8.92  | 9.04  | 11.06 | 11.05 | 11.07 | 11.06 |
| Up | ENSMUSG00000022257 | 2.00 | 1.65E-99  | Laptn4b       | protein_coding | 8.18  | 8.03  | 7.78  | 8.06  | 10.09 | 9.98  | 10.13 | 9.80  |
| Up | ENSMUSG00000022353 | 2.00 | 4.60E-102 | Mss1          | protein_coding | 8.10  | 8.06  | 8.13  | 8.16  | 10.13 | 10.02 | 10.13 | 10.11 |
| Up | ENSMUSG00000038305 | 1.99 | 2.55E-88  | Spats2l       | protein_coding | 6.70  | 7.16  | 7.25  | 7.17  | 9.11  | 9.01  | 9.11  | 8.94  |
| Up | ENSMUSG00000026932 | 1.99 | 4.18E-153 | Nacc2         | protein_coding | 9.26  | 9.27  | 9.16  | 9.24  | 11.13 | 11.22 | 11.36 | 11.11 |
| Up | ENSMUSG00000037306 | 1.98 | 6.99E-105 | Man1c1        | protein_coding | 7.43  | 7.42  | 7.27  | 7.48  | 9.33  | 9.51  | 9.39  | 9.20  |
| Up | ENSMUSG00000041046 | 1.98 | 1.46E-13  | Ramp3         | protein_coding | 4.42  | 4.09  | 4.47  | 4.25  | 5.79  | 5.71  | 6.18  | 6.32  |
| Up | ENSMUSG00000028051 | 1.97 | 9.87E-33  | Hcn3          | protein_coding | 5.85  | 6.42  | 5.80  | 6.10  | 7.78  | 8.23  | 7.87  | 7.94  |
| Up | ENSMUSG00000059713 | 1.96 | 6.93E-85  | Rcan3         | protein_coding | 7.55  | 7.69  | 7.41  | 7.93  | 9.55  | 9.59  | 9.58  | 9.68  |
| Up | ENSMUSG00000028161 | 1.96 | 2.29E-40  | Cgrrf1        | protein_coding | 6.23  | 6.62  | 6.69  | 7.04  | 8.60  | 8.57  | 8.58  | 8.62  |
| Up | ENSMUSG00000004791 | 1.96 | 5.33E-11  | Pgf           | protein_coding | 4.70  | 3.88  | 4.57  | 4.37  | 6.51  | 6.13  | 6.13  | 5.75  |
| Up | ENSMUSG00000044646 | 1.96 | 2.55E-16  | Zbtb7c        | protein_coding | 4.54  | 4.53  | 4.40  | 4.78  | 6.13  | 6.15  | 6.64  | 6.38  |
| Up | ENSMUSG00000062300 | 1.95 | 2.18E-12  | Nectin2       | protein_coding | 4.98  | 4.34  | 5.52  | 5.33  | 6.75  | 7.23  | 6.73  | 6.93  |
| Up | ENSMUSG00000024063 | 1.94 | 1.51E-58  | Lbh           | protein_coding | 7.94  | 8.01  | 7.94  | 7.76  | 9.96  | 9.85  | 9.98  | 9.53  |
| Up | ENSMUSG00000036699 | 1.94 | 1.64E-27  | Zcchc12       | protein_coding | 6.79  | 7.06  | 6.28  | 7.38  | 8.72  | 9.07  | 8.70  | 8.84  |
| Up | ENSMUSG00000054162 | 1.94 | 4.87E-108 | Spock3        | protein_coding | 8.74  | 8.85  | 8.87  | 9.00  | 10.80 | 10.75 | 10.79 | 10.85 |
| Up | ENSMUSG00000029094 | 1.94 | 2.49E-129 | Afap1         | protein_coding | 7.71  | 7.62  | 7.64  | 7.49  | 9.65  | 9.61  | 9.44  | 9.41  |
| Up | ENSMUSG00000030170 | 1.94 | 7.39E-14  | Wnt5b         | protein_coding | 4.57  | 4.82  | 4.27  | 4.19  | 6.22  | 6.31  | 6.12  | 6.18  |
| Up | ENSMUSG00000053141 | 1.93 | 1.66E-286 | Ptpr          | protein_coding | 9.95  | 9.99  | 10.02 | 10.07 | 11.90 | 11.90 | 12.03 | 11.92 |
| Up | ENSMUSG00000024991 | 1.93 | 2.63E-32  | Eif3a         | protein_coding | 10.49 | 10.38 | 10.51 | 10.43 | 12.48 | 12.31 | 12.39 | 12.33 |
| Up | ENSMUSG00000053519 | 1.93 | 6.20E-31  | Kcnip1        | protein_coding | 6.98  | 6.99  | 6.67  | 6.76  | 8.79  | 8.92  | 8.71  | 8.54  |
| Up | ENSMUSG00000022465 | 1.96 | 6.93E-06  | Tnfr5a        | protein_coding | 5.74  | 5.96  | 5.74  | 6.05  | 7.40  | 7.52  | 7.30  | 7.30  |
| Up | ENSMUSG00000039910 | 1.92 | 3.24E-48  | Ctse2         | protein_coding | 7.27  | 7.32  | 7.25  | 6.98  | 8.89  | 9.33  | 9.14  | 8.98  |
| Up | ENSMUSG00000025141 | 1.92 | 8.37E-09  | Myadml2       | protein_coding | 4.18  | 3.88  | 4.09  | 4.78  | 5.94  | 6.44  | 5.47  | 5.81  |
| Up | ENSMUSG00000043388 | 1.91 | 1.47E-96  | Tmem130       | protein_coding | 9.33  | 9.30  | 9.02  | 9.18  | 11.13 | 11.28 | 11.01 | 11.05 |
| Up | ENSMUSG00000032946 | 1.91 | 1.12E-35  | Rasgrp2       | protein_coding | 5.55  | 5.91  | 5.80  | 5.67  | 7.84  | 7.45  | 7.60  | 7.36  |
| Up | ENSMUSG00000045314 | 1.91 | 5.56E-27  | Sowahb        | protein_coding | 5.64  | 5.78  | 5.54  | 5.55  | 7.39  | 7.33  | 7.57  | 7.43  |
| Up | ENSMUSG00000039954 | 1.91 | 3.30E-35  | Stk32a        | protein_coding | 6.03  | 5.49  | 5.83  | 6.19  | 7.73  | 7.82  | 7.80  | 7.63  |
| Up | ENSMUSG00000032714 | 1.91 | 1.08E-16  | Syde1         | protein_coding | 5.92  | 5.46  | 5.65  | 5.57  | 7.59  | 6.98  | 7.86  | 7.36  |
| Up | ENSMUSG00000015653 | 1.90 | 1.09E-26  | Steap2        | protein_coding | 6.72  | 6.54  | 6.14  | 7.12  | 8.49  | 8.52  | 8.53  | 8.59  |
| Up | ENSMUSG00000030043 | 1.90 | 1.27E-13  | Tacr1         | protein_coding | 4.51  | 5.04  | 4.91  | 5.00  | 6.59  | 6.79  | 6.41  | 6.68  |
| Up | ENSMUSG00000004637 | 1.90 | 1.47E-64  | Wwox          | protein_coding | 6.86  | 7.05  | 6.94  | 6.93  | 8.89  | 8.63  | 8.96  | 8.75  |
| Up | ENSMUSG00000026672 | 1.89 | 1.06E-64  | Optn          | protein_coding | 7.07  | 7.03  | 7.14  | 7.27  | 8.92  | 8.67  | 9.27  | 8.89  |
| Up | ENSMUSG00000020067 | 1.89 | 9.96E-14  | Mypn          | protein_coding | 4.65  | 4.47  | 4.65  | 5.14  | 6.23  | 6.53  | 6.74  | 6.37  |
| Up | ENSMUSG00000020205 | 1.89 | 4.74E-78  | Phlda1        | protein_coding | 7.35  | 7.26  | 7.32  | 7.45  | 9.10  | 9.44  | 9.17  | 9.10  |
| Up | ENSMUSG00000034161 | 1.89 | 4.25E-07  | Sox           | protein_coding | 3.02  | 3.63  | 3.68  | 3.98  | 4.54  | 4.66  | 4.54  | 5.32  |
| Up | ENSMUSG00000076441 | 1.88 | 1.11E-46  | Ass1          | protein_coding | 6.34  | 6.41  | 6.49  | 6.74  | 8.25  | 8.17  | 8.62  | 8.29  |
| Up | ENSMUSG00000048899 | 1.88 | 4.74E-35  | Rimk1a        | protein_coding | 6.54  | 6.56  | 6.20  | 6.50  | 8.03  | 8.37  | 8.61  | 8.09  |
| Up | ENSMUSG00000031824 | 1.87 | 1.89E-83  | 6430548M08Rik | protein_coding | 10.23 | 10.09 | 10.18 | 9.95  | 11.96 | 12.06 | 12.11 | 11.78 |
| Up | ENSMUSG00000047250 | 1.87 | 1.29E-29  | Ptgs1         | protein_coding | 5.57  | 5.89  | 5.73  | 5.70  | 7.75  | 7.73  | 7.54  | 7.14  |
| Up | ENSMUSG00000049946 | 1.87 | 3.14E-37  | BC030500      | protein_coding | 6.63  | 6.67  | 6.61  | 6.47  | 8.25  | 8.45  | 8.55  | 8.43  |
| Up | ENSMUSG00000025190 | 1.87 | 4.65E-134 | Got1          | protein_coding | 9.83  | 9.80  | 9.73  | 9.76  | 11.67 | 11.72 | 11.77 | 11.39 |
| Up | ENSMUSG00000032648 | 1.87 | 3.45E-17  | Pygm          | protein_coding | 6.39  | 6.05  | 5.97  | 5.91  | 7.82  | 7.98  | 7.97  | 7.81  |
| Up | ENSMUSG00000032172 | 1.87 | 9.97E-63  | Olfm2         | protein_coding | 7.80  | 7.80  | 7.69  | 7.81  | 9.83  | 9.58  | 9.55  | 9.51  |
| Up | ENSMUSG00000071531 | 1.87 | 2.11E-08  | Gprin2        | protein_coding | 4.72  | 5.19  | 4.82  | 5.24  | 6.60  | 6.79  | 7.06  | 6.44  |
| Up | ENSMUSG00000020099 | 1.86 | 1.30E-23  | Unc5b         | protein_coding | 7.09  | 7.07  | 7.23  | 7.37  | 9.34  | 8.50  | 9.16  | 8.93  |
| Up | ENSMUSG00000048138 | 1.86 | 9.36E-11  | Dmrt2         | protein_coding | 4.89  | 4.58  | 4.27  | 4.31  | 6.47  | 6.26  | 5.81  | 6.20  |
| Up | ENSMUSG00000027238 | 1.86 | 3.08E-84  | Frmf5         | protein_coding | 7.80  | 7.99  | 7.85  | 7.95  | 9.62  | 9.90  | 9.71  | 9.71  |
| Up | ENSMUSG00000035936 | 1.86 | 6.57E-146 | Alth5a1       | protein_coding | 8.94  | 8.90  | 8.70  | 8.84  | 10.65 | 10.84 | 10.74 | 10.54 |
| Up | ENSMUSG00000031364 | 1.86 | 2.60E-07  | Gpr           | protein_coding | 4.11  | 4.01  | 4.30  | 4.02  | 5.77  | 5.69  | 5.66  | 5.70  |
| Up | ENSMUSG00000041000 | 1.86 | 4.93E-42  | Trim62        | protein_coding | 6.65  | 6.58  | 6.99  | 6.75  | 8.37  | 8.78  | 8.78  | 8.26  |
| Up | ENSMUSG00000034312 | 1.85 | 6.15E-144 | Iqsec1        | protein_coding | 11.07 | 11.05 | 11.04 | 10.89 | 12.91 | 12.84 | 13.02 | 12.66 |
| Up | ENSMUSG00000020732 | 1.85 | 9.00E-05  | Rab37         | protein_coding | 3.95  | 4.31  | 4.43  | 4.48  | 5.64  | 6.45  | 6.00  | 5.84  |
| Up | ENSMUSG00000042485 | 1.85 | 2.57E-03  | Mustn1        | protein_coding | 3.86  | 3.88  | 3.65  | 3.08  | 5.36  | 3.22  | 5.79  | 5.05  |
| Up | ENSMUSG00000047507 | 1.84 | 6.16E-09  | Baiap3        | protein_coding | 4.51  | 5.52  | 5.37  | 5.70  | 6.71  | 7.54  | 6.24  | 7.44  |
| Up | ENSMUSG00000036862 | 1.84 | 3.16E-43  | Dchs1         | protein_coding | 6.85  | 6.67  | 6.89  | 6.69  | 8.63  | 8.57  | 8.88  | 8.16  |
| Up | ENSMUSG00000042129 | 1.84 | 1.48E-19  | Rassf4        | protein_coding | 5.69  | 6.25  | 6.59  | 5.90  | 7.65  | 7.93  | 7.86  | 7.48  |
| Up | ENSMUSG00000026335 | 1.84 | 5.91E-168 | Pam           | protein_coding | 10.28 | 10.24 | 10.36 | 10.21 | 12.06 | 12.05 | 12.29 | 12.01 |
| Up | ENSMUSG00000032763 | 1.83 | 3.43E-13  | Ilvl1         | protein_coding | 5.41  | 5.00  | 5.68  | 5.82  | 7.14  | 7.25  | 7.52  | 7.06  |
| Up | ENSMUSG00000019865 | 1.83 | 2.93E-09  | Nmbr          | protein_coding | 4.67  | 5.02  | 3.89  | 4.28  | 5.97  | 6.49  | 6.09  | 5.97  |
| Up | ENSMUSG00000054667 | 1.83 | 5.63E-03  | Irs4          | protein_coding | 3.91  | 3.46  | 4.24  | 3.86  | 5.44  | 5.86  | 3.00  | 5.93  |
| Up | ENSMUSG00000035226 | 1.83 | 4.55E-119 | Rims4         | protein_coding | 8.89  | 8.94  | 8.85  | 8.68  | 10.94 | 10.75 | 10.52 | 10.52 |
| Up | ENSMUSG00000037946 | 1.83 | 9.43E-28  | Fxyd3         | protein_coding | 5.80  | 6.22  | 5.80  | 5.22  | 7.33  | 7.24  | 7.08  | 7.49  |
| Up | ENSMUSG00000020258 | 1.83 | 1.07E-48  | Unc119        | protein_coding | 6.63  | 6.52  | 6.59  | 6.38  | 8.31  | 8.21  | 8.09  | 8.24  |
| Up | ENSMUSG00000074228 | 1.83 | 1.64E-45  | Gm10645       | protein_coding | 5.78  | 5.46  | 5.63  | 5.64  | 7.31  | 7.48  | 7.36  | 7.31  |
| Up | ENSMUSG00000039607 | 1.82 | 6.10E-89  | Rbms3         | protein_coding | 7.87  | 8.02  | 7.95  | 7.96  | 9.79  | 9.73  | 9.96  | 9.58  |
| Up | ENSMUSG00000020834 | 1.82 | 1.36E-10  | Dhrs13        | protein_coding | 4.65  | 4.82  | 4.37  | 4.50  | 6.00  | 6.03  | 6.68  | 6.09  |
| Up | ENSMUSG00000020098 | 1.82 | 2.41E-08  | Pcbd1         | protein_coding | 4.22  | 4.95  | 4.46  | 4.39  | 5.67  | 6.61  | 6.15  | 5.75  |
| Up | ENSMUSG00000054423 | 1.82 | 2.73E-151 | Cadps         | protein_coding | 10.51 | 10.52 | 10.51 | 10.39 | 12.35 | 12.29 | 12.44 | 12.08 |
| Up | ENSMUSG00000020324 | 1.81 | 1.33E-09  | Rec8          | protein_coding | 3.86  | 4.24  | 4.20  | 4.51  | 5.72  | 5.71  | 5.61  | 5.85  |
| Up | ENSMUSG00000007594 | 1.81 | 1.28E-34  | Hapln4        | protein_coding | 8.53  | 8.43  | 8.51  | 8.09  | 10.05 | 10.25 | 10.42 | 10.01 |
| Up | ENSMUSG00000016552 | 1.80 | 4.07E-31  | Foxrd2        | protein_coding | 6.36  | 6.56  | 6.27  | 6.38  | 7.98  | 8.13  | 8.55  | 7.76  |
| Up | ENSMUSG00000042514 | 1.80 | 2.32E-09  | Klh14         | protein_coding | 4.51  | 4.50  | 3.80  | 4.09  | 5.63  | 5.61  | 5.85  | 6.12  |
| Up | ENSMUSG00000023328 | 1.80 | 3.17E-68  | Ache          | protein_coding | 7.39  | 7.46  | 7.36  | 7.38  | 9.11  | 9.10  | 9.31  | 9.18  |
| Up | ENSMUSG00000036564 | 1.80 | 8.57E-133 | Ndrq4         | protein_coding | 11.92 | 11.94 | 11.95 | 11.84 | 13.70 | 13.76 | 13.81 | 13.55 |
| Up | ENSMUSG00000034295 | 1.80 | 6.69E-72  | Fthsd3        | protein_coding |       |       |       |       |       |       |       |       |

|    |                     |      |           |               |                |       |       |       |       |       |       |       |       |
|----|---------------------|------|-----------|---------------|----------------|-------|-------|-------|-------|-------|-------|-------|-------|
| Up | ENSMUSG00000032908  | 1.78 | 1.46E-21  | Sgpp2         | protein_coding | 6.12  | 6.28  | 5.83  | 5.83  | 7.94  | 7.88  | 7.61  | 7.50  |
| Up | ENSMUSG00000019146  | 1.78 | 1.32E-80  | Cacng2        | protein_coding | 9.08  | 9.18  | 9.23  | 9.22  | 10.97 | 10.96 | 11.12 | 10.73 |
| Up | ENSMUSG00000027965  | 1.78 | 7.86E-74  | Olfm3         | protein_coding | 7.04  | 7.25  | 6.99  | 7.37  | 8.94  | 9.03  | 8.87  | 8.85  |
| Up | ENSMUSG00000020218  | 1.78 | 7.14E-03  | Wif1          | protein_coding | 3.50  | 2.95  | 3.93  | 3.60  | 4.84  | 4.68  | 4.52  | 5.43  |
| Up | ENSMUSG00000055026  | 1.78 | 5.11E-78  | Gabrg3        | protein_coding | 7.83  | 7.95  | 7.73  | 7.97  | 9.50  | 9.89  | 9.59  | 9.59  |
| Up | ENSMUSG00000034037  | 1.78 | 2.00E-13  | Fgf5          | protein_coding | 5.15  | 5.26  | 4.93  | 5.45  | 6.37  | 7.27  | 6.39  | 7.22  |
| Up | ENSMUSG00000023697  | 1.78 | 1.27E-04  | Gna14         | protein_coding | 3.50  | 3.03  | 3.36  | 3.92  | 4.94  | 4.94  | 4.92  | 5.00  |
| Up | ENSMUSG00000023084  | 1.77 | 2.20E-39  | Lrrc71        | protein_coding | 6.95  | 6.67  | 6.64  | 6.63  | 8.39  | 8.59  | 8.60  | 8.26  |
| Up | ENSMUSG00000067578  | 1.77 | 5.42E-17  | Cbln4         | protein_coding | 5.96  | 6.59  | 5.94  | 6.23  | 7.82  | 7.69  | 8.18  | 7.95  |
| Up | ENSMUSG00000030844  | 1.77 | 2.48E-37  | Rgs10         | protein_coding | 7.51  | 7.56  | 7.66  | 9.40  | 9.14  | 9.58  | 9.22  | 9.22  |
| Up | ENSMUSG00000038112  | 1.77 | 7.59E-13  | AW551984      | protein_coding | 5.26  | 5.25  | 4.85  | 5.72  | 7.05  | 7.12  | 6.67  | 7.00  |
| Up | ENSMUSG00000010553  | 1.77 | 1.06E-28  | N4bp3         | protein_coding | 6.13  | 6.28  | 6.35  | 6.55  | 8.14  | 7.88  | 8.29  | 7.87  |
| Up | ENSMUSG00000044864  | 1.77 | 5.23E-118 | Ankrd50       | protein_coding | 8.52  | 8.39  | 8.41  | 8.38  | 10.24 | 10.27 | 10.27 | 9.95  |
| Up | ENSMUSG00000032220  | 1.77 | 4.16E-52  | Myo1e         | protein_coding | 6.49  | 6.54  | 6.59  | 6.35  | 8.35  | 8.12  | 8.32  | 8.06  |
| Up | ENSMUSG00000031790  | 1.77 | 3.63E-24  | Mmp15         | protein_coding | 6.18  | 6.09  | 5.91  | 6.56  | 8.21  | 7.76  | 7.90  | 7.76  |
| Up | ENSMUSG00000058006  | 1.77 | 1.70E-63  | Mdn1          | protein_coding | 9.14  | 9.32  | 9.35  | 9.48  | 11.09 | 11.09 | 10.80 | 11.32 |
| Up | ENSMUSG00000020321  | 1.77 | 2.56E-83  | Mdh1          | protein_coding | 10.74 | 10.76 | 10.78 | 10.76 | 12.48 | 12.57 | 12.63 | 12.41 |
| Up | ENSMUSG00000009951  | 1.77 | 8.00E-11  | 6330409D20Rik | protein_coding | 3.95  | 3.73  | 3.93  | 4.05  | 5.09  | 5.56  | 5.56  | 5.31  |
| Up | ENSMUSG00000039943  | 1.76 | 1.49E-78  | Plcb4         | protein_coding | 8.22  | 8.16  | 7.85  | 7.85  | 9.87  | 9.83  | 9.73  | 9.65  |
| Up | ENSMUSG00000040710  | 1.76 | 3.12E-46  | Sf6a4         | protein_coding | 6.89  | 7.17  | 7.33  | 7.27  | 8.71  | 8.17  | 8.73  | 8.98  |
| Up | ENSMUSG00000048395  | 1.76 | 1.27E-58  | Scrl1         | protein_coding | 9.65  | 9.45  | 9.50  | 9.24  | 11.24 | 11.24 | 11.24 | 10.93 |
| Up | ENSMUSG00000036815  | 1.76 | 1.62E-57  | Dpp10         | protein_coding | 8.55  | 8.72  | 8.48  | 9.02  | 10.20 | 10.61 | 10.48 | 10.52 |
| Up | ENSMUSG00000032890  | 1.76 | 1.67E-145 | Rims3         | protein_coding | 9.01  | 8.95  | 8.86  | 8.86  | 10.62 | 10.67 | 10.75 | 10.63 |
| Up | ENSMUSG00000029167  | 1.75 | 3.48E-110 | Ppargc1a      | protein_coding | 9.12  | 9.35  | 9.20  | 9.05  | 10.78 | 10.90 | 11.10 | 10.90 |
| Up | ENSMUSG000000110086 | 1.75 | 6.84E-06  | Gm45623       | protein_coding | 3.10  | 3.83  | 3.65  | 3.50  | 5.02  | 4.64  | 4.57  | 5.24  |
| Up | ENSMUSG00000018659  | 1.75 | 1.01E-53  | Pnpo          | protein_coding | 6.78  | 6.98  | 7.19  | 7.19  | 8.73  | 8.65  | 8.85  | 8.82  |
| Up | ENSMUSG00000022537  | 1.75 | 2.71E-132 | Tmem44        | protein_coding | 8.43  | 8.45  | 8.47  | 8.34  | 10.29 | 10.11 | 10.14 | 10.09 |
| Up | ENSMUSG00000048281  | 1.75 | 4.82E-10  | Dleu7         | protein_coding | 4.42  | 5.19  | 5.00  | 5.17  | 6.38  | 6.62  | 6.52  | 6.79  |
| Up | ENSMUSG00000004085  | 1.75 | 1.17E-48  | Map3k20       | protein_coding | 7.03  | 7.11  | 7.05  | 6.91  | 8.80  | 8.72  | 8.62  | 8.61  |
| Up | ENSMUSG00000019820  | 1.74 | 6.15E-86  | Utm           | protein_coding | 8.73  | 9.04  | 8.67  | 8.96  | 10.52 | 10.75 | 10.54 | 10.55 |
| Up | ENSMUSG00000021730  | 1.74 | 1.02E-107 | Hcn1          | protein_coding | 10.36 | 10.31 | 10.39 | 10.29 | 12.07 | 12.07 | 12.20 | 11.95 |
| Up | ENSMUSG00000021200  | 1.74 | 4.49E-06  | Asb2          | protein_coding | 4.39  | 3.78  | 4.40  | 4.02  | 5.75  | 5.89  | 5.58  | 5.41  |
| Up | ENSMUSG00000024245  | 1.74 | 3.49E-116 | Frm3d3        | protein_coding | 8.49  | 8.25  | 8.47  | 8.25  | 10.21 | 10.21 | 10.21 | 9.98  |
| Up | ENSMUSG00000032312  | 1.74 | 5.34E-41  | Csc1          | protein_coding | 7.22  | 7.31  | 6.85  | 6.93  | 9.06  | 8.76  | 9.02  | 8.61  |
| Up | ENSMUSG00000062380  | 1.73 | 1.09E-105 | Tubb3         | protein_coding | 9.42  | 9.40  | 9.38  | 9.52  | 11.09 | 11.16 | 11.29 | 11.09 |
| Up | ENSMUSG00000055612  | 1.73 | 1.54E-09  | Dcca7         | protein_coding | 4.93  | 4.13  | 4.27  | 4.60  | 5.83  | 6.40  | 5.95  | 6.01  |
| Up | ENSMUSG00000041977  | 1.72 | 6.90E-108 | Arhgef11      | protein_coding | 9.43  | 9.35  | 9.34  | 9.22  | 11.02 | 11.07 | 11.14 | 10.97 |
| Up | ENSMUSG00000028780  | 1.72 | 1.30E-44  | Sema3c        | protein_coding | 6.95  | 6.97  | 6.89  | 6.74  | 8.43  | 8.76  | 8.73  | 8.32  |
| Up | ENSMUSG00000024940  | 1.72 | 2.81E-25  | Ltbp3         | protein_coding | 6.85  | 6.41  | 6.54  | 6.80  | 8.01  | 8.53  | 8.40  | 8.36  |
| Up | ENSMUSG00000037568  | 1.72 | 3.23E-09  | Vash2         | protein_coding | 4.51  | 4.64  | 4.75  | 4.92  | 5.82  | 6.40  | 6.50  | 6.28  |
| Up | ENSMUSG00000055214  | 1.71 | 1.84E-14  | Pld5          | protein_coding | 5.23  | 5.63  | 5.63  | 5.62  | 6.53  | 7.26  | 7.04  | 7.61  |
| Up | ENSMUSG00000027716  | 1.71 | 6.60E-37  | Trpc3         | protein_coding | 5.78  | 5.72  | 5.70  | 6.11  | 7.57  | 7.81  | 7.30  | 7.61  |
| Up | ENSMUSG00000059013  | 1.71 | 3.74E-28  | Sh2d3c        | protein_coding | 6.47  | 6.48  | 6.47  | 6.22  | 7.99  | 8.09  | 8.15  | 8.05  |
| Up | ENSMUSG00000028974  | 1.70 | 6.12E-76  | Dffa          | protein_coding | 7.60  | 7.69  | 7.78  | 7.50  | 9.36  | 9.36  | 9.41  | 9.17  |
| Up | ENSMUSG00000040265  | 1.70 | 7.33E-117 | Dnm3          | protein_coding | 9.90  | 9.87  | 9.67  | 9.81  | 11.48 | 11.59 | 11.55 | 11.43 |
| Up | ENSMUSG000000115293 | 1.70 | 1.50E-33  | Gm49333       | protein_coding | 6.72  | 6.80  | 6.70  | 7.10  | 8.56  | 8.55  | 8.48  | 8.43  |
| Up | ENSMUSG00000024241  | 1.69 | 4.45E-08  | Npcx          | protein_coding | 4.64  | 4.64  | 4.64  | 4.15  | 5.78  | 5.88  | 5.78  | 5.50  |
| Up | ENSMUSG00000039313  | 1.69 | 3.95E-22  | Minar1        | protein_coding | 5.86  | 6.15  | 6.20  | 6.40  | 8.04  | 7.82  | 7.54  | 7.75  |
| Up | ENSMUSG00000033707  | 1.69 | 5.08E-23  | Lrrc24        | protein_coding | 6.31  | 5.97  | 6.17  | 5.83  | 7.61  | 7.79  | 7.93  | 7.47  |
| Up | ENSMUSG00000024084  | 1.69 | 1.11E-12  | Opc1          | protein_coding | 5.31  | 5.70  | 5.46  | 5.52  | 7.09  | 6.79  | 7.46  | 6.98  |
| Up | ENSMUSG00000045875  | 1.69 | 2.27E-38  | Adra1a        | protein_coding | 6.35  | 6.50  | 6.48  | 6.47  | 8.00  | 8.25  | 8.19  | 7.89  |
| Up | ENSMUSG00000066036  | 1.69 | 2.61E-67  | Ubr4          | protein_coding | 10.66 | 10.54 | 10.40 | 10.40 | 12.30 | 12.20 | 11.96 | 12.27 |
| Up | ENSMUSG00000030361  | 1.69 | 7.28E-21  | Resp18        | protein_coding | 6.85  | 7.42  | 7.05  | 7.52  | 9.00  | 8.86  | 9.06  | 8.62  |
| Up | ENSMUSG00000027381  | 1.68 | 7.25E-26  | Bcl2l11       | protein_coding | 5.64  | 5.50  | 5.64  | 5.64  | 7.49  | 7.24  | 7.08  | 6.96  |
| Up | ENSMUSG00000022842  | 1.68 | 1.85E-32  | Ece2          | protein_coding | 6.70  | 6.85  | 6.70  | 7.14  | 8.57  | 8.55  | 8.49  | 8.42  |
| Up | ENSMUSG00000008489  | 1.68 | 1.56E-74  | Elavl2        | protein_coding | 8.60  | 8.90  | 8.59  | 8.64  | 10.41 | 10.31 | 10.45 | 10.25 |
| Up | ENSMUSG00000040907  | 1.68 | 1.38E-73  | Alp1a3        | protein_coding | 13.14 | 12.92 | 12.96 | 12.80 | 14.75 | 14.56 | 14.78 | 14.44 |
| Up | ENSMUSG00000002068  | 1.68 | 1.63E-23  | Ccne1         | protein_coding | 5.80  | 5.77  | 5.61  | 5.83  | 7.63  | 7.20  | 7.26  | 7.31  |
| Up | ENSMUSG00000004672  | 1.68 | 2.89E-03  | Tmem53        | protein_coding | 3.99  | 3.68  | 3.23  | 3.78  | 4.82  | 4.99  | 5.17  | 5.11  |
| Up | ENSMUSG00000040606  | 1.68 | 7.62E-148 | Kazn          | protein_coding | 8.86  | 8.87  | 8.87  | 8.74  | 10.49 | 10.59 | 10.54 | 10.38 |
| Up | ENSMUSG00000060240  | 1.68 | 2.41E-60  | Cend1         | protein_coding | 10.14 | 10.12 | 10.17 | 10.07 | 11.73 | 11.84 | 11.93 | 11.69 |
| Up | ENSMUSG00000025579  | 1.66 | 1.07E-82  | Gaa           | protein_coding | 10.19 | 10.07 | 9.86  | 9.92  | 11.70 | 11.64 | 11.72 | 11.63 |
| Up | ENSMUSG00000021253  | 1.66 | 1.13E-36  | Tgfb3         | protein_coding | 6.65  | 6.48  | 6.44  | 6.25  | 8.29  | 7.91  | 8.09  | 7.99  |
| Up | ENSMUSG00000026792  | 1.66 | 8.32E-32  | Lrsam1        | protein_coding | 7.09  | 7.27  | 7.01  | 6.93  | 8.95  | 8.50  | 8.73  | 8.62  |
| Up | ENSMUSG00000025268  | 1.66 | 3.42E-18  | Maged2        | protein_coding | 6.75  | 6.61  | 6.74  | 6.86  | 8.35  | 8.15  | 8.58  | 8.36  |
| Up | ENSMUSG00000053965  | 1.66 | 4.73E-52  | Pde5a         | protein_coding | 7.17  | 7.38  | 7.17  | 7.16  | 8.94  | 8.62  | 8.97  | 8.80  |
| Up | ENSMUSG00000047953  | 1.66 | 7.58E-05  | Gp5           | protein_coding | 3.38  | 3.97  | 3.97  | 3.74  | 5.55  | 4.19  | 5.07  | 5.35  |
| Up | ENSMUSG00000057967  | 1.65 | 3.59E-07  | Fgf18         | protein_coding | 4.45  | 4.24  | 4.40  | 4.96  | 6.44  | 6.12  | 5.19  | 6.05  |
| Up | ENSMUSG00000050063  | 1.65 | 1.31E-03  | Klk6          | protein_coding | 2.94  | 3.68  | 3.97  | 3.15  | 4.44  | 4.85  | 4.50  | 5.08  |
| Up | ENSMUSG00000041836  | 1.65 | 1.51E-97  | Ptpre         | protein_coding | 8.78  | 8.90  | 8.76  | 8.63  | 10.49 | 10.42 | 10.49 | 10.24 |
| Up | ENSMUSG00000029408  | 1.65 | 1.59E-37  | Abcb9         | protein_coding | 6.94  | 6.71  | 6.85  | 6.98  | 8.59  | 8.67  | 8.40  | 8.25  |
| Up | ENSMUSG00000020363  | 1.65 | 6.81E-14  | Gfp2          | protein_coding | 5.19  | 5.44  | 5.94  | 5.53  | 6.95  | 7.06  | 7.26  | 7.17  |
| Up | ENSMUSG00000024225  | 1.65 | 7.17E-22  | Imp2          | protein_coding | 5.79  | 5.84  | 5.45  | 5.22  | 7.20  | 7.16  | 7.33  | 6.93  |
| Up | ENSMUSG00000024044  | 1.64 | 1.53E-103 | Epb41f3       | protein_coding | 10.10 | 9.92  | 9.92  | 9.93  | 11.77 | 11.77 | 11.69 | 11.49 |
| Up | ENSMUSG00000045094  | 1.64 | 8.56E-09  | Arhgef37      | protein_coding | 5.00  | 5.08  | 4.65  | 4.53  | 6.50  | 6.08  | 6.53  | 6.12  |
| Up | ENSMUSG00000085894  | 1.64 | 1.12E-04  | Rt9           | protein_coding | 2.94  | 4.20  | 4.46  | 4.12  | 5.89  | 5.24  | 4.95  | 5.40  |
| Up | ENSMUSG00000074001  | 1.63 | 8.00E-11  | Klh40         | protein_coding | 4.82  | 4.72  | 4.52  | 5.05  | 6.15  | 6.35  | 6.40  | 6.20  |
| Up | ENSMUSG00000038777  | 1.63 | 2.98E-19  | Sema6c        | protein_coding | 6.50  | 6.73  | 6.28  | 6.10  | 7.90  | 7.96  | 8.11  | 8.05  |
| Up | ENSMUSG00000036298  | 1.63 | 4.67E-82  | Slc2a13       | protein_coding | 9.43  | 9.54  | 9.41  | 9.40  | 10.97 | 11.18 | 11.15 | 10.98 |
| Up | ENSMUSG00000030089  | 1.63 | 1.58E-06  | Slc41a3       | protein_coding | 4.03  | 3.78  | 4.57  | 3.82  | 5.71  | 4.97  | 5.30  | 5.76  |
| Up | ENSMUSG00000024427  | 1.63 | 1.81E-27  | Spry4         | protein_coding | 6.96  | 7.40  | 7.12  | 6.59  | 8.85  | 8.55  | 8.66  | 8.49  |
| Up | ENSMUSG00000023169  | 1.62 | 3.69E-113 | Slc38a1       | protein_coding | 10.22 | 10.13 | 10.11 | 10.04 | 11.76 | 11.69 | 11.91 | 11.61 |
| Up | ENSMUSG00000021913  | 1.62 | 1.50E-53  | Ogdh          | protein_coding | 8.59  | 8.41  | 8.31  | 8.08  | 9.93  | 10.05 | 10.11 | 9.76  |
| Up | ENSMUSG00000032788  | 1.62 | 9.05E-89  | Pdxk          | protein_coding | 9.57  | 9.59  | 9.52  | 9.36  | 11.14 | 11.20 | 11.19 | 10.97 |
| Up | ENSMUSG00000078963  | 1.62 | 1.26E-03  | Hsbp111       | protein_coding | 3.50  | 3.33  | 2.74  | 3.65  | 4.94  | 4.37  | 4.65  | 3.95  |
| Up | ENSMUSG00000047281  | 1.62 | 1.26E-03  | Sfn           | protein_coding | 3.86  | 3.92  | 3.84  | 3.39  | 5.20  | 3.43  | 5.66  | 5.17  |
| Up | ENSMUSG00000032600  | 1.61 | 3.46E-127 | Lanc11        |                |       |       |       |       |       |       |       |       |

|    |                     |      |           |               |                |       |       |       |       |       |       |       |       |
|----|---------------------|------|-----------|---------------|----------------|-------|-------|-------|-------|-------|-------|-------|-------|
| Up | ENSMUSG00000037349  | 1.60 | 1.79E-05  | Nudt22        | protein_coding | 3.91  | 3.83  | 4.09  | 3.50  | 5.58  | 4.68  | 5.45  | 4.63  |
| Up | ENSMUSG00000039485  | 1.60 | 1.60E-171 | Tsply4        | protein_coding | 11.02 | 10.88 | 10.90 | 10.88 | 12.48 | 12.61 | 12.55 | 12.44 |
| Up | ENSMUSG00000023905  | 1.60 | 9.74E-06  | Tnfrsf12a     | protein_coding | 4.39  | 3.78  | 3.70  | 4.15  | 4.63  | 5.74  | 5.73  | 5.11  |
| Up | ENSMUSG00000056656  | 1.60 | 2.61E-10  | Apol8         | protein_coding | 4.98  | 4.69  | 4.63  | 5.11  | 6.33  | 6.56  | 6.11  | 6.26  |
| Up | ENSMUSG00000029507  | 1.60 | 7.03E-20  | Pus1          | protein_coding | 6.24  | 6.36  | 6.15  | 6.19  | 7.80  | 7.81  | 7.83  | 7.69  |
| Up | ENSMUSG00000041351  | 1.60 | 2.25E-67  | Rap1gap       | protein_coding | 9.57  | 9.42  | 9.37  | 9.09  | 10.96 | 11.03 | 11.05 | 10.78 |
| Up | ENSMUSG00000042817  | 1.59 | 6.05E-30  | Flt3          | protein_coding | 5.54  | 6.05  | 5.94  | 5.81  | 7.45  | 7.34  | 7.47  | 7.21  |
| Up | ENSMUSG00000065776  | 1.59 | 1.75E-67  | Slc4a3        | protein_coding | 9.00  | 9.00  | 8.86  | 8.90  | 10.64 | 10.58 | 10.48 | 10.38 |
| Up | ENSMUSG00000022523  | 1.59 | 5.95E-75  | Fgf12         | protein_coding | 9.77  | 9.98  | 9.70  | 10.01 | 11.41 | 11.51 | 11.52 | 11.40 |
| Up | ENSMUSG00000024219  | 1.59 | 9.00E-80  | Anks1         | protein_coding | 7.37  | 7.44  | 7.41  | 7.28  | 8.86  | 9.04  | 8.96  | 8.90  |
| Up | ENSMUSG00000032590  | 1.58 | 3.48E-13  | Apeh          | protein_coding | 5.80  | 5.28  | 5.74  | 5.63  | 6.62  | 7.42  | 7.20  | 7.17  |
| Up | ENSMUSG00000037188  | 1.58 | 7.68E-06  | Grih3         | protein_coding | 4.29  | 3.88  | 3.70  | 4.31  | 4.84  | 5.18  | 5.78  | 5.62  |
| Up | ENSMUSG00000061046  | 1.58 | 9.44E-52  | Haghl         | protein_coding | 7.42  | 7.62  | 7.76  | 7.49  | 9.04  | 9.15  | 9.33  | 8.99  |
| Up | ENSMUSG00000039046  | 1.57 | 1.05E-08  | Usp6nl        | protein_coding | 4.26  | 3.73  | 3.97  | 4.60  | 5.76  | 5.52  | 5.39  | 5.42  |
| Up | ENSMUSG00000024887  | 1.57 | 2.58E-33  | Asah2         | protein_coding | 6.57  | 6.99  | 6.92  | 6.96  | 8.53  | 8.26  | 8.48  | 8.35  |
| Up | ENSMUSG00000009292  | 1.57 | 7.39E-33  | Trpm2         | protein_coding | 7.40  | 7.67  | 7.21  | 7.41  | 8.98  | 9.03  | 8.95  | 8.94  |
| Up | ENSMUSG00000075405  | 1.57 | 2.48E-03  | 9430097D07Rik | protein_coding | 2.85  | 3.11  | 2.64  | 3.27  | 4.31  | 3.80  | 3.35  | 4.25  |
| Up | ENSMUSG00000033083  | 1.57 | 2.38E-23  | Tbct1d4       | protein_coding | 6.16  | 5.76  | 5.81  | 5.85  | 7.40  | 7.64  | 7.49  | 7.03  |
| Up | ENSMUSG00000034997  | 1.57 | 3.62E-21  | Hlr2a         | protein_coding | 7.01  | 6.92  | 6.73  | 6.65  | 8.30  | 8.63  | 8.20  | 8.29  |
| Up | ENSMUSG00000067399  | 1.56 | 3.95E-24  | Ttrml3        | protein_coding | 6.00  | 6.40  | 6.04  | 6.20  | 7.57  | 7.61  | 8.02  | 7.88  |
| Up | ENSMUSG00000041741  | 1.56 | 2.63E-16  | Pde3a         | protein_coding | 6.46  | 6.28  | 6.30  | 6.05  | 7.86  | 7.71  | 7.86  | 7.54  |
| Up | ENSMUSG00000029168  | 1.56 | 7.03E-42  | Dpysl5        | protein_coding | 6.98  | 7.05  | 7.13  | 7.09  | 8.40  | 8.69  | 8.81  | 8.47  |
| Up | ENSMUSG00000040811  | 1.56 | 1.19E-52  | Emi2          | protein_coding | 8.92  | 8.90  | 9.21  | 9.05  | 10.55 | 10.42 | 10.74 | 10.57 |
| Up | ENSMUSG00000073705  | 1.56 | 7.11E-04  | Cenps         | protein_coding | 3.50  | 4.09  | 4.24  | 3.94  | 5.86  | 5.39  | 4.38  | 5.02  |
| Up | ENSMUSG00000033910  | 1.56 | 4.94E-63  | Gucy1a1       | protein_coding | 7.56  | 7.84  | 7.41  | 7.91  | 9.10  | 9.31  | 9.25  | 9.27  |
| Up | ENSMUSG00000002105  | 1.56 | 2.19E-32  | Slc39a13      | protein_coding | 6.82  | 6.61  | 6.77  | 6.73  | 8.04  | 8.49  | 8.22  | 8.23  |
| Up | ENSMUSG00000026141  | 1.55 | 1.11E-27  | Col19a1       | protein_coding | 6.53  | 6.52  | 6.65  | 6.52  | 8.07  | 7.63  | 8.31  | 8.19  |
| Up | ENSMUSG00000044375  | 1.55 | 7.79E-03  | Pcare         | protein_coding | 3.38  | 2.95  | 3.54  | 3.82  | 3.45  | 4.99  | 4.97  | 4.59  |
| Up | ENSMUSG00000036902  | 1.55 | 2.63E-176 | Neto2         | protein_coding | 9.12  | 9.06  | 8.93  | 9.09  | 10.66 | 10.58 | 10.57 | 10.55 |
| Up | ENSMUSG00000002812  | 1.55 | 3.52E-24  | Flii          | protein_coding | 7.94  | 7.50  | 7.61  | 7.32  | 9.24  | 8.93  | 9.26  | 9.10  |
| Up | ENSMUSG00000034310  | 1.55 | 5.96E-43  | Tmem132d      | protein_coding | 7.43  | 7.84  | 7.47  | 7.55  | 9.23  | 8.98  | 9.29  | 8.90  |
| Up | ENSMUSG00000030689  | 1.55 | 1.45E-05  | Calca         | protein_coding | 3.77  | 3.97  | 3.60  | 3.86  | 5.20  | 5.07  | 5.10  | 4.81  |
| Up | ENSMUSG00000064254  | 1.55 | 3.95E-47  | Npp13         | protein_coding | 7.64  | 7.97  | 7.88  | 7.77  | 9.57  | 9.51  | 9.36  | 9.19  |
| Up | ENSMUSG00000074231  | 1.55 | 2.59E-18  | Gn10642       | protein_coding | 6.02  | 6.10  | 6.29  | 5.88  | 7.84  | 7.39  | 7.28  | 7.11  |
| Up | ENSMUSG00000020090  | 1.54 | 3.41E-06  | Npff1         | protein_coding | 5.31  | 5.06  | 5.02  | 4.74  | 5.80  | 6.73  | 6.73  | 6.42  |
| Up | ENSMUSG00000024376  | 1.54 | 2.93E-10  | Epb414a       | protein_coding | 5.68  | 6.00  | 5.94  | 5.94  | 7.59  | 7.04  | 7.54  | 7.26  |
| Up | ENSMUSG00000043843  | 1.54 | 1.82E-20  | Tmem145       | protein_coding | 5.91  | 5.68  | 5.98  | 6.28  | 7.39  | 7.28  | 7.55  | 7.62  |
| Up | ENSMUSG00000031133  | 1.54 | 3.08E-17  | Arhgef6       | protein_coding | 7.17  | 6.78  | 6.98  | 6.94  | 8.42  | 8.53  | 8.69  | 8.28  |
| Up | ENSMUSG00000042035  | 1.54 | 8.32E-23  | Igsf3         | protein_coding | 6.47  | 6.79  | 6.94  | 6.77  | 8.01  | 8.35  | 8.46  | 8.18  |
| Up | ENSMUSG00000037747  | 1.54 | 8.31E-109 | Phyhlpl       | protein_coding | 10.01 | 10.07 | 10.02 | 10.19 | 11.71 | 11.56 | 11.61 | 11.51 |
| Up | ENSMUSG00000020061  | 1.54 | 7.89E-09  | Mybpc1        | protein_coding | 5.10  | 5.95  | 5.69  | 5.17  | 6.99  | 6.71  | 7.54  | 6.40  |
| Up | ENSMUSG00000031529  | 1.54 | 9.16E-55  | Tnks          | protein_coding | 9.69  | 9.62  | 9.59  | 9.57  | 11.34 | 11.34 | 11.10 | 11.04 |
| Up | ENSMUSG00000034813  | 1.54 | 4.84E-63  | Grip1         | protein_coding | 7.78  | 7.62  | 7.64  | 7.58  | 9.15  | 9.26  | 9.22  | 9.05  |
| Up | ENSMUSG00000026475  | 1.53 | 1.47E-07  | Rgs16         | protein_coding | 5.45  | 5.21  | 5.35  | 5.22  | 7.22  | 6.47  | 6.82  | 6.32  |
| Up | ENSMUSG00000047606  | 1.53 | 8.00E-27  | Ankrd34c      | protein_coding | 5.73  | 5.41  | 5.49  | 5.86  | 7.14  | 7.01  | 7.11  | 7.10  |
| Up | ENSMUSG00000064254  | 1.53 | 4.57E-16  | Ethe1         | protein_coding | 5.68  | 5.55  | 5.60  | 5.44  | 6.80  | 7.27  | 7.19  | 6.72  |
| Up | ENSMUSG00000031996  | 1.52 | 1.52E-124 | Ajap2         | protein_coding | 10.91 | 10.83 | 10.85 | 10.71 | 12.30 | 12.45 | 12.23 | 12.11 |
| Up | ENSMUSG00000039512  | 1.52 | 2.55E-38  | Uhrf1bp1      | protein_coding | 7.02  | 6.99  | 6.78  | 6.99  | 8.23  | 8.72  | 8.46  | 8.30  |
| Up | ENSMUSG00000045777  | 1.52 | 7.51E-39  | Ifitm10       | protein_coding | 6.85  | 6.83  | 6.85  | 6.49  | 8.16  | 8.22  | 8.16  | 8.16  |
| Up | ENSMUSG00000037419  | 1.52 | 1.50E-54  | Endod1        | protein_coding | 9.66  | 9.54  | 9.40  | 9.47  | 11.18 | 10.93 | 11.16 | 10.86 |
| Up | ENSMUSG00000019885  | 1.52 | 9.12E-94  | Grik3         | protein_coding | 8.89  | 9.09  | 8.79  | 8.85  | 10.47 | 10.39 | 10.41 | 10.42 |
| Up | ENSMUSG0000001270   | 1.52 | 3.08E-59  | Ckb           | protein_coding | 11.05 | 10.92 | 11.00 | 10.77 | 12.51 | 12.38 | 12.57 | 12.36 |
| Up | ENSMUSG00000032259  | 1.51 | 3.31E-16  | Drd2          | protein_coding | 4.59  | 4.31  | 4.43  | 4.78  | 6.17  | 5.77  | 5.98  | 5.58  |
| Up | ENSMUSG00000062373  | 1.51 | 1.79E-71  | Tmem65        | protein_coding | 8.70  | 8.71  | 8.71  | 8.89  | 10.12 | 10.43 | 10.29 | 10.18 |
| Up | ENSMUSG00000029608  | 1.51 | 4.17E-77  | Rph3a         | protein_coding | 10.95 | 10.85 | 10.97 | 12.45 | 12.37 | 12.45 | 12.40 | 12.27 |
| Up | ENSMUSG00000039103  | 1.51 | 8.99E-09  | Nexn          | protein_coding | 5.36  | 4.72  | 4.30  | 4.87  | 6.37  | 5.60  | 6.74  | 5.99  |
| Up | ENSMUSG00000029777  | 1.51 | 4.26E-88  | Gars          | protein_coding | 9.26  | 9.05  | 9.04  | 9.11  | 10.53 | 10.69 | 10.78 | 10.46 |
| Up | ENSMUSG00000039257  | 1.51 | 4.06E-69  | Vstm2b        | protein_coding | 8.04  | 7.90  | 7.95  | 8.00  | 9.46  | 9.66  | 9.41  | 9.31  |
| Up | ENSMUSG00000010297  | 1.51 | 5.51E-57  | Podrac2       | protein_coding | 9.61  | 9.44  | 9.27  | 9.41  | 10.91 | 11.08 | 10.96 | 10.77 |
| Up | ENSMUSG00000030357  | 1.50 | 3.32E-42  | Fkbp4         | protein_coding | 8.89  | 8.55  | 8.80  | 8.62  | 10.51 | 10.07 | 10.23 | 9.98  |
| Up | ENSMUSG00000039481  | 1.50 | 4.32E-05  | Nrn1          | protein_coding | 5.03  | 3.57  | 3.43  | 3.65  | 4.84  | 5.17  | 5.22  | 3.85  |
| Up | ENSMUSG00000028977  | 1.50 | 4.42E-19  | Cas21         | protein_coding | 4.39  | 5.95  | 5.75  | 5.71  | 7.12  | 7.32  | 6.73  | 7.30  |
| Up | ENSMUSG00000027313  | 1.50 | 1.46E-08  | Chac1         | protein_coding | 4.45  | 4.79  | 4.17  | 4.34  | 6.08  | 5.58  | 5.80  | 5.56  |
| Up | ENSMUSG00000021708  | 1.49 | 5.01E-75  | Rasgrf2       | protein_coding | 9.13  | 9.20  | 9.07  | 9.11  | 10.59 | 10.66 | 10.67 | 10.55 |
| Up | ENSMUSG00000058297  | 1.49 | 1.67E-115 | Spock2        | protein_coding | 11.87 | 11.81 | 11.82 | 11.77 | 13.37 | 13.32 | 13.40 | 13.15 |
| Up | ENSMUSG000000110358 | 1.49 | 5.80E-03  | A730009L09Rik | protein_coding | 3.38  | 3.19  | 3.49  | 3.94  | 4.80  | 4.85  | 4.27  | 4.61  |
| Up | ENSMUSG00000060594  | 1.49 | 6.41E-13  | Layn          | protein_coding | 5.19  | 5.10  | 5.46  | 4.85  | 6.45  | 6.69  | 6.63  | 6.36  |
| Up | ENSMUSG00000096014  | 1.49 | 1.16E-25  | Sox1          | protein_coding | 7.09  | 7.30  | 7.33  | 7.42  | 8.53  | 8.85  | 8.85  | 8.74  |
| Up | ENSMUSG00000032679  | 1.48 | 6.65E-10  | Cd59a         | protein_coding | 6.47  | 5.92  | 5.72  | 6.77  | 7.66  | 7.61  | 7.96  | 7.60  |
| Up | ENSMUSG00000036622  | 1.48 | 1.10E-54  | Atp13a2       | protein_coding | 9.19  | 9.04  | 9.15  | 9.09  | 10.65 | 10.54 | 10.70 | 10.45 |
| Up | ENSMUSG00000075592  | 1.48 | 5.86E-13  | Nynrin        | protein_coding | 6.11  | 5.96  | 5.68  | 5.77  | 7.59  | 7.58  | 7.29  | 7.21  |
| Up | ENSMUSG00000036782  | 1.48 | 2.10E-20  | Klhl13        | protein_coding | 6.77  | 6.84  | 6.57  | 7.03  | 8.05  | 8.42  | 8.13  | 8.37  |
| Up | ENSMUSG00000039203  | 1.47 | 7.79E-10  | Ilfra2        | protein_coding | 4.62  | 5.56  | 5.42  | 5.73  | 7.34  | 6.53  | 6.71  | 6.48  |
| Up | ENSMUSG00000031636  | 1.47 | 4.73E-06  | Ildim3        | protein_coding | 4.15  | 4.31  | 4.31  | 4.39  | 5.72  | 5.05  | 5.27  | 5.86  |
| Up | ENSMUSG00000050910  | 1.47 | 2.23E-47  | Cdr2l         | protein_coding | 7.93  | 7.60  | 7.66  | 7.66  | 9.26  | 9.08  | 9.28  | 9.06  |
| Up | ENSMUSG00000005583  | 1.47 | 1.70E-60  | Mef2c         | protein_coding | 10.14 | 10.41 | 10.03 | 10.34 | 11.72 | 11.76 | 11.70 | 11.64 |
| Up | ENSMUSG00000024053  | 1.47 | 1.03E-07  | Emilin2       | protein_coding | 5.45  | 5.06  | 4.89  | 4.96  | 6.79  | 6.74  | 6.92  | 6.22  |
| Up | ENSMUSG00000036634  | 1.46 | 2.86E-11  | Mag           | protein_coding | 8.53  | 8.43  | 8.63  | 8.40  | 10.37 | 9.12  | 9.96  | 10.09 |
| Up | ENSMUSG00000039838  | 1.46 | 4.21E-39  | Slc45a1       | protein_coding | 7.96  | 7.77  | 8.10  | 7.80  | 9.23  | 9.43  | 9.59  | 9.13  |
| Up | ENSMUSG00000020919  | 1.46 | 2.90E-31  | Stat5b        | protein_coding | 7.09  | 6.82  | 6.82  | 7.14  | 8.41  | 8.19  | 8.68  | 8.31  |
| Up | ENSMUSG00000032101  | 1.46 | 2.51E-30  | Ddx25         | protein_coding | 8.29  | 8.38  | 8.38  | 8.28  | 9.89  | 9.89  | 9.88  | 9.80  |
| Up | ENSMUSG00000020232  | 1.46 | 1.18E-36  | Tmem25        | protein_coding | 7.18  | 7.16  | 7.09  | 6.77  | 8.33  | 8.57  | 8.64  | 8.39  |
| Up | ENSMUSG00000026312  | 1.46 | 3.01E-23  | Cdh7          | protein_coding | 6.29  | 6.59  | 7.91  | 6.79  | 7.97  | 8.39  | 7.78  | 7.75  |
| Up | ENSMUSG00000002984  | 1.45 | 5.26E-69  | Tormm40       | protein_coding | 8.11  | 7.95  | 8.02  | 7.89  | 9.41  | 9.45  | 9.57  | 9.29  |
| Up | ENSMUSG00000036611  | 1.45 | 7.63E-13  | Eepd1         | protein_coding | 5.88  | 6.08  | 5.92  | 6.19  | 7.43  | 7.45  | 7.61  | 7.19  |
| Up | ENSMUSG00000027293  | 1.45 | 5.13E-12  | Ehd4          | protein_coding | 5.69  | 5.74  | 5.26  | 5.77  | 6.88  | 6.75  | 7.51  | 6.72  |
| Up | ENSMUSG00000038077  | 1.45 | 7.40E-68  | Kcna6b        | protein_coding |       |       |       |       |       |       |       |       |

|    |                     |      |           |               |                |       |       |       |       |       |       |       |       |
|----|---------------------|------|-----------|---------------|----------------|-------|-------|-------|-------|-------|-------|-------|-------|
| Up | ENSMUSG00000072966  | 1.44 | 1.50E-54  | Gprasp2       | protein_coding | 8.50  | 8.54  | 8.25  | 8.33  | 9.92  | 9.82  | 9.99  | 9.61  |
| Up | ENSMUSG00000025651  | 1.44 | 3.40E-58  | Uqorc1        | protein_coding | 9.36  | 9.32  | 9.45  | 9.36  | 10.86 | 10.76 | 10.93 | 10.66 |
| Up | ENSMUSG00000020262  | 1.44 | 1.87E-68  | Adarb1        | protein_coding | 10.56 | 10.44 | 10.42 | 10.27 | 11.92 | 11.99 | 11.90 | 11.63 |
| Up | ENSMUSG00000028937  | 1.44 | 1.27E-92  | Aco7          | protein_coding | 9.89  | 9.76  | 9.72  | 9.71  | 11.19 | 11.30 | 11.27 | 11.05 |
| Up | ENSMUSG00000009621  | 1.44 | 3.08E-18  | Vav2          | protein_coding | 6.48  | 6.42  | 6.29  | 6.53  | 8.03  | 7.95  | 7.71  | 7.57  |
| Up | ENSMUSG000000051343 | 1.44 | 2.24E-62  | Rab11fip5     | protein_coding | 8.88  | 8.89  | 8.92  | 8.71  | 10.32 | 10.35 | 10.31 | 10.13 |
| Up | ENSMUSG000000234891 | 1.44 | 6.44E-45  | Sncb          | protein_coding | 11.32 | 11.23 | 11.33 | 11.48 | 11.28 | 12.85 | 12.74 | 12.85 |
| Up | ENSMUSG00000025192  | 1.44 | 1.12E-52  | Entpd7        | protein_coding | 7.21  | 7.19  | 7.30  | 7.18  | 8.75  | 8.59  | 8.77  | 8.40  |
| Up | ENSMUSG00000018707  | 1.44 | 6.20E-46  | Dync1h1       | protein_coding | 11.09 | 10.83 | 10.82 | 10.87 | 12.42 | 12.21 | 12.22 | 12.22 |
| Up | ENSMUSG00000021235  | 1.43 | 1.37E-18  | Coq6          | protein_coding | 5.26  | 5.02  | 5.19  | 5.19  | 6.31  | 6.69  | 6.62  | 6.50  |
| Up | ENSMUSG00000015745  | 1.43 | 1.43E-35  | Plekho1       | protein_coding | 7.53  | 7.51  | 7.48  | 7.10  | 8.97  | 8.86  | 8.89  | 8.55  |
| Up | ENSMUSG00000029036  | 1.43 | 8.48E-45  | Atad3a        | protein_coding | 6.97  | 6.79  | 7.03  | 6.84  | 8.22  | 8.29  | 8.50  | 8.23  |
| Up | ENSMUSG00000034226  | 1.43 | 9.05E-14  | Rhov          | protein_coding | 5.38  | 5.41  | 5.45  | 4.87  | 6.70  | 6.66  | 6.57  | 6.57  |
| Up | ENSMUSG00000000766  | 1.43 | 1.00E-17  | Oprm1         | protein_coding | 6.15  | 5.83  | 6.07  | 6.57  | 7.69  | 7.77  | 7.28  | 7.45  |
| Up | ENSMUSG00000108011  | 1.43 | 8.56E-09  | Gm44596       | protein_coding | 5.23  | 5.46  | 5.29  | 5.37  | 6.70  | 6.66  | 6.83  | 6.47  |
| Up | ENSMUSG00000032554  | 1.42 | 7.36E-38  | Trf           | protein_coding | 10.02 | 9.77  | 9.86  | 9.84  | 11.59 | 10.95 | 11.13 | 11.44 |
| Up | ENSMUSG00000041263  | 1.42 | 3.01E-53  | Rusc1         | protein_coding | 8.67  | 8.54  | 8.53  | 8.34  | 9.80  | 9.99  | 10.11 | 9.84  |
| Up | ENSMUSG00000022442  | 1.42 | 1.39E-50  | Tll1          | protein_coding | 7.61  | 7.74  | 7.74  | 7.74  | 9.13  | 9.19  | 9.06  | 9.05  |
| Up | ENSMUSG00000042724  | 1.42 | 1.14E-85  | Map3k9        | protein_coding | 8.48  | 8.47  | 8.33  | 8.34  | 9.76  | 9.74  | 9.97  | 9.78  |
| Up | ENSMUSG00000033065  | 1.42 | 2.72E-83  | Pikm          | protein_coding | 10.04 | 9.99  | 9.92  | 9.79  | 11.39 | 11.35 | 11.39 | 11.28 |
| Up | ENSMUSG000000116198 | 1.42 | 6.18E-17  | C030006K11Rik | protein_coding | 5.80  | 5.44  | 5.67  | 5.81  | 6.92  | 7.30  | 7.09  | 6.77  |
| Up | ENSMUSG00000007653  | 1.42 | 1.33E-98  | Gabbr2        | protein_coding | 9.93  | 9.87  | 9.77  | 9.90  | 11.20 | 11.36 | 11.39 | 11.15 |
| Up | ENSMUSG000000062785 | 1.42 | 1.64E-56  | Kcnc3         | protein_coding | 10.02 | 10.01 | 10.15 | 9.89  | 11.53 | 11.55 | 11.47 | 11.15 |
| Up | ENSMUSG00000045664  | 1.41 | 1.93E-09  | Cdc42ep2      | protein_coding | 4.82  | 5.21  | 4.68  | 5.58  | 6.49  | 6.13  | 6.44  | 6.61  |
| Up | ENSMUSG00000033526  | 1.41 | 3.03E-79  | Ppip5k1       | protein_coding | 9.42  | 9.26  | 9.33  | 9.16  | 10.65 | 10.82 | 10.74 | 10.59 |
| Up | ENSMUSG00000042671  | 1.41 | 7.21E-55  | Rgs8          | protein_coding | 9.39  | 9.25  | 9.39  | 9.12  | 10.70 | 10.70 | 10.92 | 10.43 |
| Up | ENSMUSG00000026576  | 1.41 | 5.99E-78  | Alp1b1        | protein_coding | 13.03 | 12.99 | 13.00 | 12.91 | 14.43 | 14.39 | 14.51 | 14.23 |
| Up | ENSMUSG00000042734  | 1.41 | 3.85E-68  | Tlc9          | protein_coding | 8.98  | 9.07  | 8.93  | 9.06  | 10.33 | 10.45 | 10.56 | 10.30 |
| Up | ENSMUSG00000033249  | 1.41 | 1.99E-12  | Hsf4          | protein_coding | 6.13  | 5.59  | 5.67  | 5.88  | 7.08  | 7.20  | 7.12  | 7.29  |
| Up | ENSMUSG00000028555  | 1.41 | 1.90E-10  | Ttc39a        | protein_coding | 5.08  | 4.84  | 4.24  | 4.45  | 5.62  | 6.23  | 6.00  | 5.86  |
| Up | ENSMUSG000000057615 | 1.41 | 2.17E-03  | Ldoc1         | protein_coding | 3.38  | 3.33  | 3.30  | 3.27  | 4.19  | 4.27  | 4.67  | 4.46  |
| Up | ENSMUSG000000039419 | 1.41 | 2.48E-66  | Ctnnap2       | protein_coding | 9.14  | 8.85  | 8.92  | 9.09  | 10.32 | 10.35 | 10.53 | 10.41 |
| Up | ENSMUSG00000005148  | 1.40 | 2.21E-21  | Klf5          | protein_coding | 6.46  | 7.16  | 6.78  | 7.21  | 8.36  | 8.26  | 8.11  | 8.21  |
| Up | ENSMUSG00000010080  | 1.40 | 3.96E-06  | Epr3          | protein_coding | 5.21  | 4.67  | 4.67  | 4.69  | 6.13  | 6.07  | 6.36  | 6.07  |
| Up | ENSMUSG00000026688  | 1.40 | 1.41E-40  | Mgs13         | protein_coding | 7.23  | 6.93  | 7.15  | 7.06  | 8.38  | 8.49  | 8.72  | 8.26  |
| Up | ENSMUSG00000015112  | 1.40 | 2.08E-05  | Slc25a13      | protein_coding | 4.18  | 4.09  | 5.05  | 4.22  | 5.47  | 5.42  | 6.14  | 5.15  |
| Up | ENSMUSG000000051910 | 1.40 | 1.20E-75  | Sox6          | protein_coding | 7.85  | 7.86  | 7.75  | 7.86  | 9.19  | 9.22  | 9.16  | 9.27  |
| Up | ENSMUSG00000006641  | 1.40 | 8.73E-21  | Slc5a6        | protein_coding | 6.51  | 6.32  | 6.39  | 6.69  | 7.81  | 7.87  | 7.87  | 7.82  |
| Up | ENSMUSG00000039579  | 1.40 | 1.96E-33  | Grin3a        | protein_coding | 8.18  | 8.52  | 8.24  | 8.74  | 9.78  | 10.07 | 9.63  | 9.79  |
| Up | ENSMUSG00000026179  | 1.40 | 1.14E-73  | Pnkd          | protein_coding | 9.72  | 9.59  | 9.48  | 9.38  | 10.98 | 11.02 | 10.95 | 10.79 |
| Up | ENSMUSG00000029073  | 1.39 | 2.00E-20  | Cplp          | protein_coding | 6.46  | 6.50  | 6.45  | 6.51  | 7.79  | 7.99  | 7.95  | 7.57  |
| Up | ENSMUSG000000054793 | 1.39 | 9.15E-69  | Cadm4         | protein_coding | 9.49  | 9.45  | 9.42  | 9.47  | 10.88 | 10.66 | 10.96 | 10.85 |
| Up | ENSMUSG00000025428  | 1.39 | 3.70E-70  | Alp5a1        | protein_coding | 11.31 | 11.28 | 11.30 | 11.20 | 12.61 | 12.60 | 12.83 | 12.59 |
| Up | ENSMUSG00000009894  | 1.39 | 4.17E-119 | Snap47        | protein_coding | 10.11 | 10.06 | 10.05 | 9.98  | 11.47 | 11.37 | 11.55 | 11.34 |
| Up | ENSMUSG00000027581  | 1.39 | 5.57E-69  | Tmn3          | protein_coding | 10.72 | 10.69 | 10.67 | 10.61 | 12.11 | 11.97 | 12.18 | 11.95 |
| Up | ENSMUSG000000036377 | 1.39 | 3.91E-117 | C530008M17Rik | protein_coding | 9.60  | 9.41  | 9.48  | 9.48  | 10.95 | 10.90 | 10.91 | 10.81 |
| Up | ENSMUSG00000023031  | 1.39 | 3.25E-04  | Ce1a1         | protein_coding | 3.44  | 3.44  | 3.16  | 4.02  | 4.59  | 4.58  | 4.85  | 5.13  |
| Up | ENSMUSG00000027894  | 1.39 | 8.48E-49  | Slc6a17       | protein_coding | 10.98 | 10.92 | 10.93 | 10.71 | 12.14 | 12.24 | 12.56 | 12.09 |
| Up | ENSMUSG00000034327  | 1.38 | 1.04E-27  | Kctd9         | protein_coding | 6.64  | 6.38  | 6.62  | 6.89  | 8.03  | 8.08  | 8.08  | 7.77  |
| Up | ENSMUSG00000041658  | 1.38 | 8.11E-52  | Rragb         | protein_coding | 8.35  | 8.33  | 8.25  | 8.32  | 9.52  | 9.84  | 9.77  | 9.58  |
| Up | ENSMUSG00000075316  | 1.38 | 4.04E-18  | Scn9a         | protein_coding | 6.44  | 6.71  | 6.14  | 6.62  | 8.10  | 8.01  | 7.69  | 7.46  |
| Up | ENSMUSG00000031672  | 1.38 | 8.96E-47  | Got2          | protein_coding | 9.44  | 9.55  | 9.38  | 9.32  | 10.80 | 10.79 | 11.00 | 10.59 |
| Up | ENSMUSG00000024955  | 1.38 | 1.03E-33  | Esrta         | protein_coding | 6.99  | 7.41  | 7.24  | 7.12  | 8.70  | 8.52  | 8.47  | 8.50  |
| Up | ENSMUSG00000034863  | 1.38 | 5.05E-29  | Ano8          | protein_coding | 7.50  | 7.01  | 7.36  | 7.48  | 8.68  | 8.73  | 8.92  | 8.32  |
| Up | ENSMUSG00000031367  | 1.37 | 1.31E-32  | Ap1s2         | protein_coding | 8.22  | 8.25  | 7.97  | 8.39  | 9.67  | 9.57  | 9.71  | 9.48  |
| Up | ENSMUSG00000021974  | 1.37 | 1.62E-48  | Fgf9          | protein_coding | 7.11  | 7.47  | 7.36  | 7.32  | 8.73  | 8.73  | 8.69  | 8.53  |
| Up | ENSMUSG00000049112  | 1.37 | 1.30E-15  | Oxtr          | protein_coding | 6.02  | 6.10  | 5.68  | 6.44  | 7.27  | 7.61  | 7.37  | 7.36  |
| Up | ENSMUSG00000070717  | 1.37 | 1.98E-06  | Gm10300       | protein_coding | 3.86  | 4.13  | 3.93  | 3.69  | 5.34  | 4.42  | 5.22  | 4.95  |
| Up | ENSMUSG00000028789  | 1.37 | 3.82E-25  | Tufm          | protein_coding | 7.70  | 7.70  | 7.47  | 7.39  | 8.86  | 9.22  | 8.86  | 8.68  |
| Up | ENSMUSG000000063932 | 1.36 | 1.82E-126 | Nrxn3         | protein_coding | 10.18 | 10.18 | 10.21 | 10.10 | 11.51 | 11.56 | 11.46 | 11.41 |
| Up | ENSMUSG00000024892  | 1.36 | 6.89E-24  | Fox           | protein_coding | 7.36  | 7.29  | 7.22  | 7.10  | 8.73  | 8.67  | 8.60  | 8.31  |
| Up | ENSMUSG00000015981  | 1.36 | 4.47E-56  | Slk32c        | protein_coding | 8.85  | 8.91  | 9.07  | 8.87  | 10.29 | 10.38 | 10.37 | 10.07 |
| Up | ENSMUSG00000007021  | 1.36 | 2.92E-43  | Syngn3        | protein_coding | 8.94  | 9.02  | 8.98  | 8.86  | 10.48 | 10.24 | 10.32 | 10.17 |
| Up | ENSMUSG00000025393  | 1.36 | 5.11E-88  | Atp5b         | protein_coding | 11.55 | 11.49 | 11.50 | 11.46 | 12.79 | 12.94 | 12.94 | 12.76 |
| Up | ENSMUSG00000025854  | 1.36 | 1.14E-28  | Fam20c        | protein_coding | 7.61  | 7.93  | 7.57  | 7.86  | 9.18  | 8.99  | 9.02  | 9.17  |
| Up | ENSMUSG00000027950  | 1.36 | 3.19E-63  | Chrb2         | protein_coding | 8.60  | 8.76  | 8.66  | 8.57  | 10.05 | 10.00 | 10.08 | 9.84  |
| Up | ENSMUSG00000042826  | 1.36 | 1.07E-41  | Fgf11         | protein_coding | 7.92  | 7.79  | 7.90  | 8.06  | 9.15  | 9.36  | 9.30  | 9.23  |
| Up | ENSMUSG00000032306  | 1.36 | 2.64E-24  | Mpi           | protein_coding | 6.93  | 7.16  | 6.96  | 7.19  | 8.25  | 8.36  | 8.68  | 8.23  |
| Up | ENSMUSG00000027796  | 1.36 | 1.00E-17  | Smad9         | protein_coding | 6.79  | 6.35  | 6.94  | 6.74  | 7.96  | 8.21  | 8.20  | 7.77  |
| Up | ENSMUSG00000031960  | 1.35 | 1.63E-39  | Aars          | protein_coding | 8.93  | 9.00  | 8.92  | 8.87  | 10.27 | 10.25 | 10.45 | 10.12 |
| Up | ENSMUSG00000020085  | 1.35 | 4.23E-10  | Aifm2         | protein_coding | 5.34  | 5.68  | 5.50  | 5.94  | 7.13  | 7.17  | 6.52  | 6.74  |
| Up | ENSMUSG00000028789  | 1.35 | 5.20E-26  | Azin2         | protein_coding | 7.08  | 6.90  | 6.97  | 6.94  | 8.05  | 8.45  | 8.47  | 8.17  |
| Up | ENSMUSG00000020176  | 1.35 | 9.88E-33  | Grb10         | protein_coding | 7.41  | 7.54  | 7.27  | 7.90  | 9.00  | 9.00  | 8.84  | 8.81  |
| Up | ENSMUSG00000057378  | 1.35 | 3.40E-44  | Ryb3          | protein_coding | 9.50  | 9.60  | 9.53  | 9.41  | 10.71 | 10.90 | 10.65 | 11.11 |
| Up | ENSMUSG00000043518  | 1.34 | 1.15E-15  | Rai2          | protein_coding | 5.81  | 5.47  | 5.73  | 5.82  | 6.87  | 7.29  | 6.73  | 7.00  |
| Up | ENSMUSG00000087006  | 1.34 | 5.01E-38  | Gm13889       | protein_coding | 6.93  | 7.12  | 7.19  | 7.21  | 8.44  | 8.58  | 8.33  | 8.38  |
| Up | ENSMUSG00000030093  | 1.34 | 2.33E-10  | Wnt7a         | protein_coding | 6.51  | 5.75  | 5.67  | 6.30  | 7.25  | 7.27  | 7.74  | 7.23  |
| Up | ENSMUSG00000022887  | 1.34 | 1.94E-06  | Masp1         | protein_coding | 6.30  | 6.08  | 6.22  | 6.27  | 7.71  | 7.26  | 7.68  | 7.34  |
| Up | ENSMUSG00000035105  | 1.34 | 3.74E-08  | Egln3         | protein_coding | 5.00  | 5.59  | 5.29  | 5.34  | 6.78  | 6.33  | 6.88  | 6.16  |
| Up | ENSMUSG00000004642  | 1.34 | 2.34E-23  | Slbp          | protein_coding | 6.45  | 6.50  | 6.64  | 6.79  | 7.88  | 7.93  | 7.87  | 7.93  |
| Up | ENSMUSG00000019923  | 1.34 | 3.59E-88  | Zwint         | protein_coding | 11.52 | 11.60 | 11.57 | 11.71 | 12.89 | 12.86 | 13.08 | 12.91 |
| Up | ENSMUSG00000038845  | 1.34 | 3.44E-25  | Phb           | protein_coding | 7.81  | 7.71  | 7.88  | 7.84  | 8.96  | 9.16  | 9.35  | 9.02  |
| Up | ENSMUSG00000041231  | 1.34 | 1.80E-21  | Ublcp1        | protein_coding | 7.35  | 7.29  | 7.33  | 7.43  | 8.80  | 8.86  | 8.47  | 8.47  |
| Up | ENSMUSG00000050989  | 1.34 | 9.82E-18  | Selenon       | protein_coding | 6.56  | 6.42  | 6.48  | 6.54  | 7.48  | 7.71  | 8.10  | 7.83  |
| Up | ENSMUSG00000025988  | 1.33 | 1.32E-61  | Ndufs1        | protein_coding | 8.87  | 8.89  | 8.92  | 8.97  | 10.32 | 10.29 | 10.23 | 10.11 |
| Up | ENSMUSG00000040964  | 1.33 | 1.62E-33  | Arhgef10l     | protein_coding | 7.69  | 7.63  | 7.63  | 7.58  | 8.84  | 8.75  | 9.22  | 8.94  |
| Up | EN                  |      |           |               |                |       |       |       |       |       |       |       |       |

|    |                     |      |           |          |                |       |       |       |       |       |       |       |       |
|----|---------------------|------|-----------|----------|----------------|-------|-------|-------|-------|-------|-------|-------|-------|
| Up | ENSMUSG00000015709  | 1.33 | 6.89E-136 | Arnt2    | protein_coding | 10.28 | 10.22 | 10.37 | 10.23 | 11.55 | 11.59 | 11.72 | 11.54 |
| Up | ENSMUSG00000019124  | 1.33 | 4.11E-98  | Scn11    | protein_coding | 10.21 | 10.19 | 10.17 | 10.18 | 11.47 | 11.52 | 11.63 | 11.40 |
| Up | ENSMUSG00000032523  | 1.32 | 1.57E-04  | Hhat1    | protein_coding | 4.70  | 5.43  | 4.82  | 6.62  | 5.98  | 5.98  | 6.63  | 6.18  |
| Up | ENSMUSG000000024073 | 1.32 | 3.23E-76  | Birc6    | protein_coding | 10.16 | 10.26 | 9.91  | 10.10 | 11.45 | 11.47 | 11.30 | 11.50 |
| Up | ENSMUSG000000027963 | 1.32 | 2.44E-53  | Extf2    | protein_coding | 8.56  | 8.51  | 8.44  | 8.52  | 9.76  | 10.00 | 9.87  | 9.63  |
| Up | ENSMUSG000000067925 | 1.32 | 9.26E-35  | Rt8a     | protein_coding | 6.63  | 6.65  | 6.42  | 6.61  | 7.98  | 7.87  | 7.82  | 7.80  |
| Up | ENSMUSG000000022110 | 1.32 | 3.30E-88  | Suda2    | protein_coding | 9.26  | 9.50  | 9.36  | 9.38  | 10.68 | 10.68 | 10.67 | 10.67 |
| Up | ENSMUSG000000050043 | 1.32 | 2.27E-169 | Tmx2     | protein_coding | 9.18  | 9.13  | 9.09  | 9.10  | 10.45 | 10.46 | 10.45 | 10.40 |
| Up | ENSMUSG00000005882  | 1.32 | 2.62E-44  | Uqc1     | protein_coding | 8.02  | 8.06  | 8.14  | 7.98  | 9.40  | 9.19  | 9.48  | 9.35  |
| Up | ENSMUSG00000018589  | 1.32 | 7.22E-09  | Glra2    | protein_coding | 5.55  | 5.97  | 5.46  | 6.30  | 7.14  | 7.37  | 6.74  | 7.17  |
| Up | ENSMUSG000000052302 | 1.32 | 9.36E-77  | Tbc1d30  | protein_coding | 8.73  | 8.73  | 8.60  | 8.82  | 10.01 | 10.12 | 10.08 | 9.91  |
| Up | ENSMUSG00000030731  | 1.32 | 1.90E-46  | Syt3     | protein_coding | 8.05  | 7.86  | 7.97  | 7.79  | 9.24  | 9.24  | 9.32  | 9.00  |
| Up | ENSMUSG000000039137 | 1.31 | 4.98E-23  | Whrn     | protein_coding | 7.98  | 8.13  | 7.89  | 8.09  | 9.11  | 9.56  | 9.14  | 9.44  |
| Up | ENSMUSG000000023960 | 1.31 | 3.77E-75  | Enpp5    | protein_coding | 9.54  | 9.58  | 9.41  | 9.47  | 10.85 | 10.84 | 10.82 | 10.71 |
| Up | ENSMUSG000000091722 | 1.31 | 1.63E-16  | Siah3    | protein_coding | 6.75  | 6.97  | 6.47  | 6.51  | 7.95  | 8.33  | 7.87  | 7.62  |
| Up | ENSMUSG000000043857 | 1.31 | 1.87E-32  | Mgat5b   | protein_coding | 8.21  | 8.34  | 8.06  | 8.12  | 9.49  | 9.38  | 9.75  | 9.26  |
| Up | ENSMUSG000000004508 | 1.31 | 4.82E-17  | Gab2     | protein_coding | 7.22  | 7.47  | 7.65  | 7.23  | 8.49  | 8.80  | 9.04  | 8.31  |
| Up | ENSMUSG000000031603 | 1.30 | 1.61E-06  | Fgf20    | protein_coding | 5.92  | 5.77  | 5.57  | 5.72  | 6.67  | 6.98  | 7.14  | 7.12  |
| Up | ENSMUSG000000031840 | 1.30 | 2.20E-38  | Rab3a    | protein_coding | 11.43 | 11.45 | 11.47 | 11.40 | 12.66 | 12.87 | 12.82 | 12.60 |
| Up | ENSMUSG000000009411 | 1.30 | 8.93E-08  | Nectin4  | protein_coding | 5.23  | 4.95  | 4.95  | 5.33  | 5.97  | 6.75  | 6.33  | 6.14  |
| Up | ENSMUSG000000030058 | 1.30 | 2.02E-72  | Copp1    | protein_coding | 9.81  | 9.70  | 9.64  | 9.73  | 11.11 | 11.08 | 11.02 | 10.87 |
| Up | ENSMUSG000000038650 | 1.30 | 2.32E-17  | Rtn1     | protein_coding | 5.75  | 5.90  | 6.20  | 6.07  | 7.03  | 7.03  | 7.58  | 7.25  |
| Up | ENSMUSG000000032776 | 1.30 | 6.44E-08  | Mctp2    | protein_coding | 5.64  | 5.74  | 5.61  | 5.99  | 6.87  | 7.48  | 6.79  | 6.99  |
| Up | ENSMUSG00000104148  | 1.30 | 8.42E-39  | Pcdha2   | protein_coding | 9.08  | 8.94  | 8.75  | 8.95  | 10.18 | 10.37 | 10.24 | 10.11 |
| Up | ENSMUSG000000032238 | 1.30 | 7.23E-56  | Rora     | protein_coding | 9.01  | 9.01  | 9.15  | 9.25  | 10.27 | 10.42 | 10.63 | 10.26 |
| Up | ENSMUSG000000030655 | 1.30 | 3.06E-46  | Smg1     | protein_coding | 10.32 | 10.39 | 10.18 | 10.31 | 11.62 | 11.68 | 11.34 | 11.72 |
| Up | ENSMUSG000000023938 | 1.30 | 1.82E-14  | Aars2    | protein_coding | 6.66  | 6.33  | 6.76  | 6.60  | 7.78  | 7.90  | 8.06  | 7.66  |
| Up | ENSMUSG000000068739 | 1.30 | 1.26E-90  | Sars     | protein_coding | 9.30  | 9.28  | 9.25  | 9.33  | 10.58 | 10.59 | 10.70 | 10.45 |
| Up | ENSMUSG000000038545 | 1.30 | 9.19E-23  | Cul7     | protein_coding | 6.93  | 7.01  | 6.91  | 7.08  | 8.32  | 8.45  | 8.01  | 8.21  |
| Up | ENSMUSG000000006342 | 1.30 | 1.24E-05  | Susd2    | protein_coding | 4.36  | 4.09  | 3.89  | 4.22  | 5.04  | 4.85  | 5.20  | 5.70  |
| Up | ENSMUSG000000036745 | 1.30 | 3.40E-79  | Tllf7    | protein_coding | 10.74 | 10.80 | 10.78 | 10.69 | 11.96 | 12.09 | 11.96 | 12.00 |
| Up | ENSMUSG000000040249 | 1.30 | 4.39E-37  | Lrp1     | protein_coding | 10.72 | 10.45 | 10.50 | 10.46 | 11.94 | 11.83 | 11.65 | 11.88 |
| Up | ENSMUSG000000046490 | 1.29 | 8.87E-18  | Scn8a    | protein_coding | 6.60  | 7.00  | 6.74  | 6.35  | 8.30  | 8.30  | 8.00  | 7.56  |
| Up | ENSMUSG000000024776 | 1.29 | 6.76E-26  | Stambp1  | protein_coding | 6.60  | 6.73  | 6.83  | 7.13  | 8.13  | 8.16  | 8.34  | 8.17  |
| Up | ENSMUSG000000030323 | 1.29 | 1.87E-81  | Dvl3     | protein_coding | 8.44  | 8.60  | 8.47  | 8.53  | 9.87  | 9.75  | 9.77  | 9.79  |
| Up | ENSMUSG000000024359 | 1.29 | 2.24E-77  | Hspa9    | protein_coding | 9.79  | 9.72  | 9.57  | 11.00 | 10.97 | 10.93 | 11.07 | 10.82 |
| Up | ENSMUSG000000036278 | 1.29 | 2.40E-08  | Macrof1  | protein_coding | 5.62  | 5.68  | 5.82  | 5.67  | 6.96  | 7.07  | 6.98  | 6.67  |
| Up | ENSMUSG000000019179 | 1.29 | 5.53E-99  | Mdh2     | protein_coding | 10.05 | 10.06 | 10.09 | 9.97  | 11.31 | 11.35 | 11.43 | 11.23 |
| Up | ENSMUSG000000059361 | 1.29 | 6.65E-37  | Nrsn2    | protein_coding | 8.12  | 8.44  | 8.22  | 8.28  | 9.37  | 9.69  | 9.51  | 9.60  |
| Up | ENSMUSG000000023927 | 1.29 | 8.64E-68  | Satb1    | protein_coding | 10.24 | 10.38 | 10.25 | 10.10 | 11.49 | 11.67 | 11.54 | 11.40 |
| Up | ENSMUSG000000024524 | 1.28 | 3.30E-98  | Gnal     | protein_coding | 10.29 | 10.42 | 10.19 | 10.29 | 11.54 | 11.70 | 11.57 | 11.50 |
| Up | ENSMUSG000000005981 | 1.28 | 9.83E-50  | Trap1    | protein_coding | 7.80  | 7.89  | 7.84  | 7.92  | 9.17  | 9.08  | 9.17  | 9.10  |
| Up | ENSMUSG000000030272 | 1.28 | 2.44E-21  | Camk1    | protein_coding | 7.78  | 7.81  | 7.76  | 8.00  | 9.14  | 9.16  | 9.02  | 9.11  |
| Up | ENSMUSG000000025240 | 1.28 | 1.77E-42  | Sacm11   | protein_coding | 8.84  | 8.81  | 8.54  | 8.70  | 9.93  | 9.93  | 10.27 | 9.86  |
| Up | ENSMUSG000000093536 | 1.28 | 1.41E-24  | Smim17   | protein_coding | 6.99  | 7.00  | 6.80  | 7.10  | 8.05  | 8.29  | 8.41  | 8.19  |
| Up | ENSMUSG000000020917 | 1.28 | 2.07E-55  | Acly     | protein_coding | 8.74  | 8.86  | 8.73  | 8.84  | 10.09 | 9.93  | 10.22 | 10.00 |
| Up | ENSMUSG000000033595 | 1.28 | 4.24E-36  | Lg3      | protein_coding | 8.25  | 8.26  | 8.05  | 7.94  | 9.51  | 9.51  | 9.25  | 9.25  |
| Up | ENSMUSG000000083282 | 1.28 | 8.34E-32  | Ctcf     | protein_coding | 7.08  | 6.90  | 7.07  | 6.96  | 8.27  | 8.12  | 8.33  | 8.30  |
| Up | ENSMUSG000000032718 | 1.28 | 7.56E-10  | Mansc1   | protein_coding | 5.36  | 5.64  | 5.79  | 5.59  | 6.43  | 6.30  | 6.48  | 6.48  |
| Up | ENSMUSG000000033253 | 1.28 | 7.45E-23  | Szi2     | protein_coding | 7.56  | 7.24  | 7.28  | 7.27  | 8.49  | 8.87  | 8.39  | 8.61  |
| Up | ENSMUSG000000002900 | 1.28 | 2.45E-49  | Lamb1    | protein_coding | 7.54  | 7.58  | 7.61  | 7.71  | 8.91  | 8.87  | 8.92  | 8.79  |
| Up | ENSMUSG000000022551 | 1.28 | 9.37E-47  | Cyc1     | protein_coding | 8.60  | 8.65  | 8.80  | 8.71  | 9.82  | 9.99  | 10.14 | 9.88  |
| Up | ENSMUSG000000031227 | 1.28 | 3.47E-51  | Magee1   | protein_coding | 8.81  | 8.84  | 8.76  | 8.67  | 10.03 | 10.11 | 10.05 | 9.97  |
| Up | ENSMUSG000000010154 | 1.28 | 1.00E-16  | Spire2   | protein_coding | 6.93  | 7.00  | 6.74  | 6.75  | 8.22  | 8.13  | 8.00  | 8.07  |
| Up | ENSMUSG000000026944 | 1.28 | 1.60E-35  | Abca2    | protein_coding | 10.15 | 9.96  | 10.15 | 9.86  | 11.39 | 11.12 | 11.45 | 11.26 |
| Up | ENSMUSG000000030451 | 1.28 | 1.74E-64  | Herc2    | protein_coding | 10.65 | 10.58 | 10.55 | 10.49 | 11.84 | 11.89 | 11.71 | 11.92 |
| Up | ENSMUSG000000027284 | 1.28 | 1.40E-72  | Cdan1    | protein_coding | 9.79  | 9.58  | 9.62  | 9.65  | 10.95 | 10.97 | 10.96 | 10.84 |
| Up | ENSMUSG000000019256 | 1.28 | 5.49E-16  | Ahr      | protein_coding | 6.37  | 6.21  | 6.06  | 6.26  | 7.25  | 7.29  | 7.47  | 7.47  |
| Up | ENSMUSG000000032294 | 1.28 | 2.38E-56  | Pkm      | protein_coding | 11.62 | 11.57 | 11.58 | 11.44 | 12.88 | 12.71 | 12.94 | 12.69 |
| Up | ENSMUSG000000029177 | 1.28 | 1.89E-03  | Denpa    | protein_coding | 5.00  | 4.61  | 4.68  | 4.31  | 5.38  | 6.10  | 6.19  | 5.32  |
| Up | ENSMUSG000000030442 | 1.27 | 2.98E-41  | Pcdha1   | protein_coding | 9.06  | 8.94  | 8.75  | 8.95  | 10.15 | 10.15 | 10.34 | 10.22 |
| Up | ENSMUSG000000026131 | 1.27 | 6.71E-43  | Dst      | protein_coding | 11.77 | 11.60 | 11.54 | 11.66 | 13.11 | 12.83 | 12.64 | 13.04 |
| Up | ENSMUSG000000057315 | 1.27 | 1.72E-18  | Arhgap24 | protein_coding | 6.23  | 6.34  | 6.09  | 6.03  | 7.31  | 7.64  | 7.26  | 7.37  |
| Up | ENSMUSG000000014633 | 1.27 | 5.08E-13  | Cmc2     | protein_coding | 6.00  | 6.19  | 5.82  | 5.71  | 7.27  | 7.12  | 7.04  | 7.19  |
| Up | ENSMUSG000000051527 | 1.27 | 1.48E-24  | Usp29    | protein_coding | 8.19  | 8.42  | 8.41  | 8.49  | 9.29  | 9.78  | 9.75  | 9.70  |
| Up | ENSMUSG000000036932 | 1.27 | 6.73E-27  | Aifm1    | protein_coding | 6.93  | 7.07  | 6.86  | 6.98  | 8.22  | 8.28  | 8.16  | 8.17  |
| Up | ENSMUSG000000037916 | 1.27 | 9.91E-46  | Ndufv1   | protein_coding | 8.91  | 8.73  | 8.79  | 8.81  | 10.02 | 10.09 | 10.19 | 10.00 |
| Up | ENSMUSG000000026930 | 1.27 | 1.96E-16  | Gpsm1    | protein_coding | 7.27  | 7.42  | 7.31  | 7.24  | 8.50  | 8.78  | 8.20  | 8.69  |
| Up | ENSMUSG000000044788 | 1.27 | 5.54E-20  | Fads6    | protein_coding | 7.04  | 6.97  | 7.20  | 6.84  | 8.48  | 7.85  | 8.39  | 8.25  |
| Up | ENSMUSG000000026858 | 1.27 | 8.33E-41  | Miga2    | protein_coding | 8.24  | 7.93  | 8.23  | 7.94  | 9.42  | 9.28  | 9.46  | 9.22  |
| Up | ENSMUSG000000038990 | 1.27 | 1.54E-33  | Cables2  | protein_coding | 8.02  | 7.85  | 8.09  | 7.80  | 9.01  | 9.21  | 9.46  | 9.07  |
| Up | ENSMUSG000000035466 | 1.27 | 1.41E-12  | Klc4     | protein_coding | 6.27  | 6.57  | 6.43  | 6.12  | 7.34  | 7.70  | 7.72  | 7.54  |
| Up | ENSMUSG000000035722 | 1.27 | 1.02E-13  | Abca7    | protein_coding | 5.78  | 5.63  | 5.63  | 5.91  | 6.98  | 6.82  | 6.77  | 6.82  |
| Up | ENSMUSG000000028526 | 1.27 | 3.32E-42  | Fh1      | protein_coding | 7.70  | 7.65  | 7.73  | 7.81  | 8.99  | 8.99  | 8.95  | 8.87  |
| Up | ENSMUSG000000102312 | 1.27 | 3.24E-34  | Pcdha3   | protein_coding | 9.10  | 8.96  | 8.77  | 8.85  | 10.16 | 10.37 | 10.22 | 10.07 |
| Up | ENSMUSG000000103707 | 1.27 | 1.50E-39  | Pcdha6   | protein_coding | 9.11  | 8.98  | 8.77  | 8.97  | 10.18 | 10.40 | 10.21 | 10.07 |
| Up | ENSMUSG000000103800 | 1.26 | 4.19E-35  | Pcdha8   | protein_coding | 9.06  | 8.92  | 8.75  | 8.94  | 10.13 | 10.33 | 10.19 | 10.14 |
| Up | ENSMUSG00000007440  | 1.26 | 2.56E-38  | Pcdha11  | protein_coding | 9.08  | 8.93  | 8.75  | 8.95  | 10.13 | 10.34 | 10.23 | 10.05 |
| Up | ENSMUSG000000022307 | 1.26 | 4.78E-71  | Oxr1     | protein_coding | 11.10 | 11.17 | 11.00 | 10.96 | 12.37 | 12.33 | 12.45 | 12.10 |
| Up | ENSMUSG000000103092 | 1.26 | 3.07E-37  | Pcdha5   | protein_coding | 9.12  | 8.98  | 8.78  | 8.98  | 10.18 | 10.37 | 10.24 | 10.09 |
| Up | ENSMUSG000000103255 | 1.26 | 8.48E-35  | Pcdhac1  | protein_coding | 9.15  | 8.98  | 8.80  | 8.98  | 10.19 | 10.39 | 10.25 | 10.11 |
| Up | ENSMUSG000000041020 | 1.26 | 2.66E-56  | Map7d2   | protein_coding | 10.57 | 10.42 | 10.47 | 10.28 | 11.77 | 11.64 | 11.83 | 11.54 |
| Up | ENSMUSG000000029361 | 1.26 | 1.67E-46  | Nos1     | protein_coding | 9.12  | 9.21  | 9.14  | 9.14  | 10.37 | 10.64 | 10.38 | 10.22 |
| Up | ENSMUSG000000041028 | 1.26 | 4.04E-84  | Ghltm    | protein_coding | 10.21 | 10.19 | 10.12 | 10.21 | 11.34 | 11.60 | 11.49 | 11.32 |
| Up | ENSMUSG000000034613 | 1.26 | 1.86E-42  | Ppm1h    | protein_coding | 9.57  | 9.45  | 9.35  | 9.34  | 10.66 | 10.94 | 10.56 | 10.55 |
| Up | ENSMUSG000000006299 | 1.26 | 1.06E-38  | Alamp    | protein_coding | 9.24  | 9.18  | 9.09  | 9.1   |       |       |       |       |

|    |                     |      |           |               |                |       |       |       |       |       |       |       |       |
|----|---------------------|------|-----------|---------------|----------------|-------|-------|-------|-------|-------|-------|-------|-------|
| Up | ENSMUSG00000033885  | 1.26 | 2.29E-26  | Pxk           | protein_coding | 7.35  | 7.42  | 7.37  | 7.20  | 8.53  | 8.85  | 8.64  | 8.19  |
| Up | ENSMUSG00000025478  | 1.26 | 6.67E-17  | Dpysl4        | protein_coding | 6.82  | 6.65  | 6.77  | 6.51  | 7.66  | 7.95  | 8.18  | 7.81  |
| Up | ENSMUSG00000026825  | 1.25 | 3.61E-59  | Dnm1          | protein_coding | 12.46 | 12.43 | 12.41 | 12.41 | 13.57 | 13.69 | 13.75 | 13.47 |
| Up | ENSMUSG000000021747 | 1.25 | 3.48E-17  | 4930452B06Rik | protein_coding | 6.65  | 6.81  | 7.20  | 6.65  | 8.11  | 7.99  | 7.97  | 8.19  |
| Up | ENSMUSG00000040276  | 1.25 | 5.99E-66  | Pacsin1       | protein_coding | 11.03 | 10.87 | 10.99 | 10.76 | 12.17 | 12.17 | 12.32 | 11.98 |
| Up | ENSMUSG000000052105 | 1.25 | 8.17E-40  | Mctf1         | protein_coding | 8.72  | 8.34  | 8.54  | 8.33  | 9.81  | 9.83  | 9.76  | 9.51  |
| Up | ENSMUSG000000036764 | 1.25 | 1.25E-15  | Dnajc12       | protein_coding | 5.85  | 5.72  | 5.85  | 5.69  | 6.85  | 6.84  | 7.04  | 6.85  |
| Up | ENSMUSG00000041842  | 1.25 | 1.53E-06  | Fhd1c1        | protein_coding | 5.73  | 5.17  | 5.40  | 5.59  | 6.45  | 6.18  | 7.19  | 6.63  |
| Up | ENSMUSG00000028773  | 1.25 | 5.74E-47  | Fabp3         | protein_coding | 8.41  | 8.22  | 8.24  | 8.16  | 9.48  | 9.47  | 9.59  | 9.45  |
| Up | ENSMUSG00000030739  | 1.25 | 1.79E-16  | Myh14         | protein_coding | 7.63  | 7.65  | 7.42  | 7.87  | 9.06  | 8.46  | 9.03  | 8.91  |
| Up | ENSMUSG00000104252  | 1.25 | 2.10E-34  | Pcdha4        | protein_coding | 9.15  | 9.02  | 8.83  | 8.97  | 10.19 | 10.38 | 10.26 | 10.12 |
| Up | ENSMUSG00000008348  | 1.25 | 7.78E-16  | Ubc           | protein_coding | 7.59  | 7.16  | 7.41  | 7.34  | 8.81  | 8.32  | 8.73  | 8.53  |
| Up | ENSMUSG00000030611  | 1.24 | 1.56E-20  | Mbps11        | protein_coding | 6.10  | 6.12  | 6.37  | 6.09  | 7.36  | 7.36  | 7.41  | 7.36  |
| Up | ENSMUSG000000032279 | 1.24 | 9.74E-58  | ldh3a         | protein_coding | 10.22 | 10.20 | 10.22 | 10.10 | 11.28 | 11.47 | 11.44 | 11.31 |
| Up | ENSMUSG00000104318  | 1.24 | 1.64E-42  | Pcdha7        | protein_coding | 9.12  | 8.96  | 8.80  | 8.97  | 10.16 | 10.35 | 10.21 | 10.08 |
| Up | ENSMUSG000000021477 | 1.24 | 3.20E-30  | Ctsl          | protein_coding | 8.21  | 7.92  | 7.71  | 7.83  | 9.23  | 9.15  | 9.29  | 8.93  |
| Up | ENSMUSG00000096883  | 1.24 | 9.51E-03  | Shisa8        | protein_coding | 3.67  | 3.83  | 3.97  | 4.12  | 4.92  | 4.85  | 4.88  | 4.98  |
| Up | ENSMUSG00000034958  | 1.24 | 7.27E-66  | Atcay         | protein_coding | 10.02 | 10.15 | 9.92  | 9.89  | 11.30 | 11.32 | 11.25 | 11.07 |
| Up | ENSMUSG000000028710 | 1.24 | 3.28E-26  | Atpa1f        | protein_coding | 7.90  | 7.96  | 8.00  | 8.03  | 9.13  | 9.17  | 9.38  | 9.11  |
| Up | ENSMUSG000000027603 | 1.24 | 1.14E-28  | Gsp17         | protein_coding | 8.02  | 8.02  | 8.26  | 7.96  | 9.30  | 9.45  | 9.30  | 9.12  |
| Up | ENSMUSG000000025992 | 1.24 | 3.14E-66  | Gsp1f         | protein_coding | 8.84  | 8.90  | 8.77  | 8.92  | 10.08 | 10.19 | 10.19 | 9.89  |
| Up | ENSMUSG00000103770  | 1.24 | 2.78E-36  | Pcdha9        | protein_coding | 9.12  | 9.02  | 8.82  | 9.00  | 10.18 | 10.40 | 10.25 | 10.07 |
| Up | ENSMUSG00000016319  | 1.24 | 7.92E-47  | Slc25a5       | protein_coding | 9.23  | 8.97  | 9.08  | 9.08  | 10.29 | 10.37 | 10.49 | 10.14 |
| Up | ENSMUSG00000025597  | 1.24 | 1.59E-14  | Klhl4         | protein_coding | 6.36  | 6.00  | 6.22  | 6.53  | 7.60  | 7.28  | 7.67  | 7.38  |
| Up | ENSMUSG00000020329  | 1.24 | 1.39E-16  | Poimr1        | protein_coding | 6.44  | 6.23  | 6.53  | 6.33  | 7.83  | 7.45  | 7.41  | 7.61  |
| Up | ENSMUSG00000049191  | 1.24 | 8.00E-15  | Rtl5          | protein_coding | 6.39  | 6.50  | 6.63  | 6.62  | 7.89  | 7.75  | 7.71  | 7.60  |
| Up | ENSMUSG00000037904  | 1.24 | 2.54E-08  | Ankrd9        | protein_coding | 5.69  | 5.71  | 5.57  | 5.62  | 6.78  | 7.11  | 6.79  | 6.53  |
| Up | ENSMUSG00000103310  | 1.24 | 8.64E-43  | Pcdha12       | protein_coding | 9.09  | 8.98  | 8.82  | 8.98  | 10.16 | 10.34 | 10.21 | 10.07 |
| Up | ENSMUSG000000021868 | 1.24 | 5.15E-27  | Ppif          | protein_coding | 7.21  | 7.32  | 7.40  | 7.16  | 8.44  | 8.57  | 8.45  | 8.50  |
| Up | ENSMUSG000000022270 | 1.24 | 4.23E-33  | Retreg1       | protein_coding | 7.81  | 7.95  | 7.88  | 7.72  | 9.19  | 8.97  | 9.10  | 8.98  |
| Up | ENSMUSG000000031007 | 1.24 | 3.58E-26  | Atp6ap2       | protein_coding | 8.89  | 9.00  | 8.84  | 9.04  | 10.23 | 10.13 | 10.35 | 9.95  |
| Up | ENSMUSG000000023032 | 1.23 | 8.31E-52  | Slc4a8        | protein_coding | 9.29  | 9.39  | 9.28  | 9.20  | 10.54 | 10.59 | 10.66 | 10.25 |
| Up | ENSMUSG000000047759 | 1.23 | 1.04E-53  | Hs3st3a1      | protein_coding | 3.95  | 4.50  | 4.65  | 5.84  | 5.11  | 5.44  | 4.72  | 5.38  |
| Up | ENSMUSG000000025213 | 1.23 | 9.33E-03  | Kazs3a1       | protein_coding | 3.67  | 4.05  | 4.43  | 3.65  | 4.66  | 3.65  | 5.05  | 4.83  |
| Up | ENSMUSG00000066357  | 1.23 | 1.22E-30  | Wdr6          | protein_coding | 8.26  | 8.21  | 8.37  | 8.52  | 9.29  | 9.56  | 9.64  | 9.74  |
| Up | ENSMUSG000000032131 | 1.23 | 6.20E-25  | Abcg4         | protein_coding | 8.09  | 7.81  | 7.93  | 7.81  | 8.92  | 9.28  | 9.31  | 8.91  |
| Up | ENSMUSG00000019863  | 1.23 | 5.71E-15  | Orai1         | protein_coding | 5.83  | 6.11  | 5.87  | 5.75  | 6.80  | 7.14  | 6.96  | 7.32  |
| Up | ENSMUSG00000061080  | 1.23 | 1.97E-92  | Lsamp         | protein_coding | 11.55 | 11.58 | 11.60 | 11.67 | 12.83 | 12.84 | 12.93 | 12.70 |
| Up | ENSMUSG00000055424  | 1.23 | 4.15E-14  | Gm9970        | protein_coding | 5.54  | 5.81  | 5.52  | 5.66  | 6.84  | 6.71  | 6.64  | 6.98  |
| Up | ENSMUSG000000037487 | 1.23 | 2.16E-58  | Ubr5          | protein_coding | 10.03 | 10.07 | 9.86  | 9.98  | 11.35 | 11.09 | 11.22 | 11.18 |
| Up | ENSMUSG000000028164 | 1.22 | 3.23E-09  | Manba         | protein_coding | 6.05  | 5.72  | 6.06  | 6.11  | 7.20  | 7.18  | 7.17  | 7.10  |
| Up | ENSMUSG000000045039 | 1.22 | 1.43E-23  | Megf8         | protein_coding | 9.04  | 8.93  | 8.75  | 8.63  | 10.13 | 9.92  | 10.22 | 9.96  |
| Up | ENSMUSG000000061878 | 1.22 | 1.42E-03  | Sphk1         | protein_coding | 4.42  | 3.33  | 3.49  | 4.05  | 4.56  | 4.96  | 5.00  | 4.92  |
| Up | ENSMUSG000000021577 | 1.22 | 1.87E-109 | Sdha          | protein_coding | 10.51 | 10.59 | 10.46 | 10.45 | 11.77 | 11.66 | 11.80 | 11.67 |
| Up | ENSMUSG00000004565  | 1.22 | 1.14E-24  | Pnpl6a        | protein_coding | 7.19  | 7.21  | 7.16  | 7.55  | 8.25  | 8.78  | 8.53  | 8.32  |
| Up | ENSMUSG000000045775 | 1.22 | 9.20E-04  | Slc16a5       | protein_coding | 3.67  | 4.09  | 3.49  | 4.19  | 5.01  | 5.00  | 5.14  | 4.11  |
| Up | ENSMUSG000000011752 | 1.22 | 2.90E-54  | Pigan1        | protein_coding | 8.96  | 8.80  | 8.95  | 8.78  | 10.03 | 9.85  | 10.02 | 9.85  |
| Up | ENSMUSG00000000088  | 1.22 | 2.08E-42  | Cox5a         | protein_coding | 8.60  | 8.61  | 8.75  | 8.74  | 9.94  | 9.91  | 9.96  | 9.75  |
| Up | ENSMUSG000000030870 | 1.22 | 2.29E-50  | Ubf1f         | protein_coding | 8.71  | 8.53  | 8.38  | 8.73  | 9.88  | 9.91  | 9.91  | 9.72  |
| Up | ENSMUSG00000024228  | 1.22 | 2.83E-07  | Nudt12        | protein_coding | 5.21  | 4.93  | 5.26  | 5.65  | 6.55  | 6.40  | 6.43  | 6.29  |
| Up | ENSMUSG00000047434  | 1.22 | 2.50E-29  | Xyylt1        | protein_coding | 7.45  | 7.32  | 7.29  | 7.33  | 8.36  | 8.72  | 8.58  | 8.51  |
| Up | ENSMUSG000000024811 | 1.22 | 1.50E-26  | Tnks2         | protein_coding | 10.04 | 10.06 | 9.95  | 10.02 | 11.33 | 11.39 | 11.05 | 11.15 |
| Up | ENSMUSG000000029056 | 1.22 | 3.29E-18  | Pank4         | protein_coding | 6.12  | 6.20  | 6.11  | 6.32  | 7.32  | 7.45  | 7.44  | 7.24  |
| Up | ENSMUSG000000022415 | 1.22 | 1.73E-52  | Syng1         | protein_coding | 10.98 | 11.04 | 11.02 | 10.88 | 12.21 | 12.12 | 12.40 | 12.03 |
| Up | ENSMUSG000000029314 | 1.22 | 7.89E-05  | Gpat3         | protein_coding | 5.17  | 4.89  | 4.87  | 5.30  | 6.43  | 5.95  | 6.05  | 6.27  |
| Up | ENSMUSG00000048004  | 1.22 | 3.96E-10  | Tmem196       | protein_coding | 5.74  | 6.31  | 6.48  | 6.48  | 7.26  | 7.49  | 7.65  | 7.41  |
| Up | ENSMUSG000000060923 | 1.22 | 6.07E-09  | Acyp2         | protein_coding | 6.54  | 6.48  | 6.48  | 6.48  | 7.36  | 7.74  | 7.83  | 7.75  |
| Up | ENSMUSG000000035000 | 1.22 | 7.12E-32  | Impdh1        | protein_coding | 7.80  | 7.49  | 7.45  | 7.29  | 8.78  | 8.70  | 8.78  | 8.38  |
| Up | ENSMUSG000000038028 | 1.22 | 5.36E-23  | Tigar         | protein_coding | 7.43  | 7.47  | 7.41  | 7.18  | 8.64  | 8.60  | 8.66  | 8.37  |
| Up | ENSMUSG000000032118 | 1.22 | 1.26E-46  | Fez1          | protein_coding | 10.36 | 10.23 | 10.32 | 10.27 | 11.57 | 11.44 | 11.59 | 11.43 |
| Up | ENSMUSG00000021190  | 1.21 | 1.04E-62  | Lgmn          | protein_coding | 8.28  | 8.24  | 8.22  | 8.19  | 9.50  | 9.46  | 9.42  | 9.36  |
| Up | ENSMUSG00000063802  | 1.21 | 4.10E-28  | Hspbp1        | protein_coding | 7.59  | 7.55  | 7.56  | 7.71  | 8.90  | 8.65  | 8.90  | 8.73  |
| Up | ENSMUSG00000040054  | 1.21 | 2.17E-28  | Baz2a         | protein_coding | 9.08  | 9.06  | 8.88  | 8.82  | 10.18 | 10.28 | 10.15 | 10.05 |
| Up | ENSMUSG00000070866  | 1.21 | 4.33E-36  | Zfp804a       | protein_coding | 8.30  | 8.23  | 8.12  | 8.12  | 9.23  | 9.45  | 9.47  | 9.41  |
| Up | ENSMUSG00000042401  | 1.21 | 8.68E-44  | Crtac1        | protein_coding | 8.60  | 8.45  | 8.52  | 8.38  | 9.64  | 9.64  | 9.93  | 9.53  |
| Up | ENSMUSG00000002731  | 1.21 | 1.68E-08  | Prkra         | protein_coding | 5.76  | 5.71  | 6.23  | 6.08  | 7.07  | 7.23  | 7.27  | 6.89  |
| Up | ENSMUSG00000046841  | 1.21 | 2.74E-21  | Kcap4         | protein_coding | 7.17  | 7.26  | 7.47  | 7.18  | 8.45  | 8.57  | 8.65  | 8.14  |
| Up | ENSMUSG000000022407 | 1.21 | 1.24E-10  | Adsl          | protein_coding | 6.51  | 6.37  | 6.57  | 6.40  | 7.74  | 7.65  | 7.90  | 7.16  |
| Up | ENSMUSG000000020978 | 1.21 | 1.17E-81  | Klhdc2        | protein_coding | 9.41  | 9.52  | 9.48  | 9.43  | 10.53 | 10.78 | 10.63 | 10.72 |
| Up | ENSMUSG000000010461 | 1.21 | 5.26E-11  | Eya4          | protein_coding | 5.47  | 5.62  | 5.68  | 5.68  | 6.59  | 7.11  | 6.68  | 6.61  |
| Up | ENSMUSG000000020220 | 1.21 | 1.55E-76  | Vps13d        | protein_coding | 9.82  | 9.87  | 9.81  | 9.71  | 10.97 | 11.03 | 10.96 | 11.07 |
| Up | ENSMUSG000000028318 | 1.21 | 4.93E-05  | Polr1e        | protein_coding | 4.95  | 5.02  | 5.19  | 5.14  | 5.95  | 6.56  | 6.38  | 5.66  |
| Up | ENSMUSG000000037426 | 1.21 | 1.81E-54  | Depdc5        | protein_coding | 8.67  | 8.71  | 8.62  | 8.48  | 9.81  | 9.71  | 9.89  | 9.75  |
| Up | ENSMUSG000000056775 | 1.21 | 9.33E-06  | Mybl2         | protein_coding | 5.12  | 5.12  | 5.10  | 5.76  | 6.17  | 6.11  | 6.95  | 6.75  |
| Up | ENSMUSG000000038050 | 1.21 | 2.35E-71  | Osbpl2        | protein_coding | 8.45  | 8.40  | 8.31  | 8.60  | 9.67  | 9.61  | 9.61  | 9.63  |
| Up | ENSMUSG000000000776 | 1.21 | 5.66E-35  | Polr3d        | protein_coding | 7.14  | 7.20  | 7.11  | 6.92  | 8.41  | 8.17  | 8.27  | 8.24  |
| Up | ENSMUSG000000040152 | 1.21 | 2.06E-04  | Tbhs1         | protein_coding | 3.72  | 4.53  | 4.82  | 4.54  | 5.44  | 5.98  | 5.65  | 5.44  |
| Up | ENSMUSG000000047963 | 1.20 | 7.69E-03  | Stbd1         | protein_coding | 4.75  | 4.44  | 3.43  | 4.48  | 5.49  | 5.74  | 4.92  | 5.27  |
| Up | ENSMUSG000000040703 | 1.20 | 2.23E-04  | Cyp2s1        | protein_coding | 4.29  | 4.50  | 4.17  | 4.65  | 5.58  | 5.81  | 5.22  | 5.10  |
| Up | ENSMUSG000000020802 | 1.20 | 8.68E-30  | Ube2o         | protein_coding | 8.86  | 8.87  | 8.93  | 8.76  | 10.12 | 10.05 | 10.14 | 9.87  |
| Up | ENSMUSG000000041801 | 1.20 | 4.19E-04  | Phlda3        | protein_coding | 5.86  | 5.40  | 5.40  | 6.05  | 7.23  | 7.27  | 7.27  | 6.86  |
| Up | ENSMUSG00000068876  | 1.20 | 8.90E-09  | Cgn           | protein_coding | 5.47  | 5.28  | 5.20  | 5.46  | 6.09  | 6.81  | 6.46  | 6.45  |
| Up | ENSMUSG000000006782 | 1.20 | 1.58E-10  | Cnp           | protein_coding | 9.97  | 9.79  | 10.14 | 9.98  | 11.46 | 10.44 | 11.16 | 11.39 |
| Up | ENSMUSG000000016349 | 1.20 | 8.78E-42  | Eef1a2        | protein_coding | 12.11 | 12.02 | 11.99 | 11.81 | 13.27 | 13.18 | 13.28 | 12.99 |
| Up | ENSMUSG000000021270 | 1.20 | 1.19E-32  | Hsp90aa1      | protein_coding | 12.34 | 12.28 | 11.97 | 12.00 | 13.55 | 13.34 | 13.22 | 13.17 |
| Up | ENSMUSG000000024193 | 1.20 | 6.26E-16  | Phf1          | protein_coding | 7.15  | 7.18  | 7.03  | 6.97  | 8.05  | 8.43  | 8.25  | 8.28  |
|    |                     |      |           |               |                |       |       |       |       |       |       |       |       |



|    |                     |      |          |               |                  |       |       |       |       |       |       |       |       |
|----|---------------------|------|----------|---------------|------------------|-------|-------|-------|-------|-------|-------|-------|-------|
| Up | ENSMUSG00000092094  | 1.19 | 1.42E-04 | Zfp804b       | protein_coding   | 4.18  | 5.17  | 4.80  | 5.24  | 5.66  | 5.91  | 5.89  | 6.38  |
| Up | ENSMUSG00000014602  | 1.19 | 1.21E-47 | Kif1a         | protein_coding   | 12.15 | 11.92 | 11.94 | 11.77 | 13.23 | 13.12 | 13.22 | 12.98 |
| Up | ENSMUSG00000026748  | 1.19 | 1.56E-53 | Pknox2        | protein_coding   | 8.34  | 8.48  | 8.34  | 8.62  | 9.71  | 9.69  | 9.55  | 9.56  |
| Up | ENSMUSG00000016757  | 1.19 | 1.80E-10 | Tlil12        | protein_coding   | 6.09  | 6.25  | 6.23  | 5.94  | 7.17  | 7.35  | 7.42  | 7.13  |
| Up | ENSMUSG00000074793  | 1.19 | 4.10E-05 | Hspa12b       | protein_coding   | 4.18  | 3.97  | 4.27  | 4.63  | 5.19  | 4.89  | 5.59  | 5.43  |
| Up | ENSMUSG00000031400  | 1.19 | 2.75E-25 | Ggppdx        | protein_coding   | 6.94  | 6.73  | 6.84  | 6.95  | 7.92  | 8.00  | 8.27  | 7.88  |
| Up | ENSMUSG00000022203  | 1.18 | 1.22E-09 | Etf2          | protein_coding   | 5.71  | 5.02  | 5.59  | 5.87  | 6.95  | 6.17  | 6.36  | 6.85  |
| Up | ENSMUSG00000024948  | 1.18 | 2.88E-44 | Mapk2         | protein_coding   | 7.62  | 7.71  | 7.51  | 7.60  | 8.65  | 8.80  | 8.92  | 8.72  |
| Up | ENSMUSG00000039652  | 1.18 | 1.39E-61 | Cpeb3         | protein_coding   | 9.37  | 9.41  | 9.32  | 9.24  | 10.59 | 10.48 | 10.64 | 10.33 |
| Up | ENSMUSG00000028649  | 1.18 | 4.32E-34 | Macf1         | protein_coding   | 11.67 | 11.65 | 11.54 | 11.57 | 12.83 | 12.77 | 12.50 | 13.00 |
| Up | ENSMUSG00000039683  | 1.18 | 7.42E-25 | Sdk1          | protein_coding   | 5.97  | 6.30  | 6.14  | 6.15  | 7.27  | 7.15  | 7.40  | 7.28  |
| Up | ENSMUSG00000018166  | 1.18 | 2.23E-07 | Erbp3         | protein_coding   | 6.46  | 6.10  | 6.46  | 6.29  | 7.99  | 6.67  | 7.53  | 7.42  |
| Up | ENSMUSG00000001416  | 1.18 | 1.65E-40 | Cct3          | protein_coding   | 8.32  | 8.22  | 8.16  | 8.22  | 9.58  | 9.29  | 9.33  | 9.38  |
| Up | ENSMUSG00000035172  | 1.18 | 1.21E-09 | Plekhh3       | protein_coding   | 5.42  | 5.62  | 5.55  | 4.98  | 6.66  | 6.28  | 6.43  | 6.43  |
| Up | ENSMUSG00000025795  | 1.18 | 4.17E-18 | Rassf3        | protein_coding   | 6.95  | 7.10  | 7.11  | 7.05  | 8.15  | 8.26  | 8.27  | 8.13  |
| Up | ENSMUSG00000017943  | 1.18 | 1.19E-35 | Gdap11f       | protein_coding   | 8.43  | 8.46  | 8.51  | 8.19  | 9.56  | 9.64  | 9.61  | 9.46  |
| Up | ENSMUSG00000002319  | 1.18 | 5.10E-17 | Ip04          | protein_coding   | 7.90  | 7.97  | 8.00  | 7.66  | 9.01  | 9.03  | 9.23  | 8.90  |
| Up | ENSMUSG00000016179  | 1.18 | 2.21E-17 | Camk1g        | protein_coding   | 6.66  | 6.78  | 6.98  | 6.58  | 7.91  | 8.00  | 7.87  | 7.87  |
| Up | ENSMUSG000000005161 | 1.17 | 6.53E-69 | Prdx2         | protein_coding   | 9.16  | 9.09  | 9.04  | 9.23  | 10.37 | 10.29 | 10.35 | 10.20 |
| Up | ENSMUSG000000336533 | 1.17 | 1.23E-11 | Cdc42ep3      | protein_coding   | 5.26  | 5.36  | 5.11  | 5.77  | 6.69  | 6.69  | 6.66  | 6.23  |
| Up | ENSMUSG000000062070 | 1.17 | 1.03E-55 | Pgk1          | protein_coding   | 9.24  | 9.24  | 9.40  | 9.21  | 10.35 | 10.47 | 10.60 | 10.33 |
| Up | ENSMUSG00000027495  | 1.17 | 3.39E-17 | Fam210b       | protein_coding   | 7.64  | 7.63  | 8.02  | 8.05  | 8.70  | 8.90  | 9.24  | 9.15  |
| Up | ENSMUSG00000039989  | 1.17 | 9.05E-50 | Cbx4          | protein_coding   | 8.06  | 8.19  | 8.26  | 8.15  | 9.47  | 9.28  | 9.30  | 9.26  |
| Up | ENSMUSG00000036098  | 1.17 | 7.59E-09 | Myrf          | protein_coding   | 9.00  | 8.63  | 8.77  | 8.56  | 10.41 | 9.19  | 9.86  | 9.94  |
| Up | ENSMUSG000000042487 | 1.17 | 1.14E-28 | Leo1          | protein_coding   | 7.40  | 7.36  | 7.42  | 7.51  | 8.68  | 8.51  | 8.59  | 8.51  |
| Up | ENSMUSG00000031634  | 1.17 | 7.22E-31 | Ufsp2         | protein_coding   | 8.00  | 8.01  | 8.04  | 8.01  | 8.98  | 9.05  | 9.45  | 9.17  |
| Up | ENSMUSG00000031708  | 1.17 | 5.58E-33 | Tecr          | protein_coding   | 9.73  | 9.80  | 9.68  | 9.78  | 10.91 | 11.07 | 10.93 | 10.72 |
| Up | ENSMUSG00000023947  | 1.17 | 7.14E-04 | Nfkbi         | protein_coding   | 5.00  | 5.08  | 4.87  | 4.19  | 6.13  | 5.33  | 5.82  | 6.07  |
| Up | ENSMUSG00000039824  | 1.17 | 5.19E-17 | Myl6b         | protein_coding   | 6.40  | 6.20  | 6.73  | 6.34  | 7.58  | 7.49  | 7.48  | 7.69  |
| Up | ENSMUSG00000037270  | 1.17 | 3.69E-36 | 4932438A13Rik | protein_coding   | 9.58  | 9.82  | 9.63  | 9.74  | 10.77 | 10.93 | 10.64 | 11.08 |
| Up | ENSMUSG000000057766 | 1.17 | 9.72E-27 | Ankrd29       | protein_coding   | 7.61  | 7.49  | 7.29  | 7.35  | 8.78  | 8.64  | 8.54  | 8.38  |
| Up | ENSMUSG000000027270 | 1.17 | 3.35E-16 | Lamp5         | protein_coding   | 7.18  | 7.52  | 7.09  | 7.20  | 8.23  | 8.17  | 8.80  | 8.32  |
| Up | ENSMUSG000000200689 | 1.17 | 1.59E-46 | Psa1          | protein_coding   | 8.10  | 8.20  | 8.22  | 8.39  | 9.21  | 9.30  | 9.40  | 9.43  |
| Up | ENSMUSG000000024059 | 1.17 | 9.03E-34 | Ctip4         | protein_coding   | 8.17  | 8.52  | 8.53  | 8.66  | 9.50  | 9.46  | 9.85  | 9.34  |
| Up | ENSMUSG00000009633  | 1.17 | 2.70E-05 | G0s2          | protein_coding   | 5.34  | 5.64  | 4.70  | 4.74  | 6.88  | 6.06  | 6.20  | 5.88  |
| Up | ENSMUSG00000027698  | 1.17 | 2.00E-28 | Ncah1         | protein_coding   | 9.31  | 9.33  | 9.12  | 9.12  | 10.40 | 10.24 | 10.67 | 10.22 |
| Up | ENSMUSG00000038936  | 1.17 | 3.04E-22 | Scppdh        | protein_coding   | 7.63  | 8.14  | 7.92  | 8.06  | 9.20  | 9.07  | 9.00  | 9.14  |
| Up | ENSMUSG00000030259  | 1.17 | 4.90E-25 | Rassf8        | protein_coding   | 7.68  | 7.75  | 7.86  | 7.91  | 9.08  | 8.86  | 8.98  | 8.87  |
| Up | ENSMUSG00000017721  | 1.17 | 2.19E-51 | Pigt          | protein_coding   | 8.42  | 8.39  | 8.48  | 8.38  | 9.62  | 9.42  | 9.73  | 9.50  |
| Up | ENSMUSG00000026305  | 1.16 | 2.67E-59 | Lrrfp1        | protein_coding   | 8.51  | 8.63  | 8.62  | 8.47  | 9.78  | 9.71  | 9.79  | 9.56  |
| Up | ENSMUSG00000024587  | 1.16 | 2.90E-62 | Nars          | protein_coding   | 9.39  | 9.44  | 9.46  | 9.38  | 10.59 | 10.58 | 10.70 | 10.42 |
| Up | ENSMUSG00000004455  | 1.16 | 1.93E-43 | Ppp1cc        | protein_coding   | 8.72  | 8.59  | 8.70  | 8.64  | 9.81  | 9.90  | 9.95  | 9.58  |
| Up | ENSMUSG00000005986  | 1.16 | 1.27E-26 | Ankr13d       | protein_coding   | 7.21  | 7.36  | 7.30  | 7.43  | 8.50  | 8.61  | 8.55  | 8.18  |
| Up | ENSMUSG000000181770 | 1.16 | 9.16E-37 | Atp5g3        | protein_coding   | 8.93  | 8.89  | 9.03  | 9.00  | 9.99  | 10.22 | 10.26 | 9.99  |
| Up | ENSMUSG000000032127 | 1.16 | 4.12E-27 | Vps11         | protein_coding   | 7.54  | 7.80  | 7.82  | 7.56  | 8.81  | 8.77  | 8.97  | 8.77  |
| Up | ENSMUSG000000082229 | 1.16 | 3.83E-18 | Nap12         | protein_coding   | 8.72  | 8.63  | 8.81  | 8.89  | 10.07 | 9.91  | 9.82  | 9.79  |
| Up | ENSMUSG000000042363 | 1.16 | 4.08E-03 | Xkr7          | protein_coding   | 4.13  | 3.59  | 3.09  | 3.69  | 4.70  | 3.92  | 4.77  | 4.77  |
| Up | ENSMUSG00000031458  | 1.16 | 4.41E-19 | Coprs         | protein_coding   | 6.80  | 7.03  | 6.84  | 7.04  | 8.23  | 7.83  | 7.89  | 7.89  |
| Up | ENSMUSG000000021460 | 1.16 | 2.03E-44 | Auh           | protein_coding   | 8.45  | 8.60  | 8.65  | 8.42  | 9.63  | 9.64  | 9.63  | 9.42  |
| Up | ENSMUSG000000024773 | 1.16 | 1.23E-24 | Atg2a         | protein_coding   | 7.58  | 7.43  | 7.17  | 7.35  | 8.69  | 8.55  | 8.58  | 8.27  |
| Up | ENSMUSG00000024644  | 1.16 | 5.22E-18 | Cndp2         | protein_coding   | 7.37  | 7.35  | 7.28  | 7.29  | 8.62  | 8.62  | 8.62  | 8.43  |
| Up | ENSMUSG00000026247  | 1.16 | 5.34E-04 | Ecel1         | protein_coding   | 4.59  | 4.82  | 4.49  | 5.24  | 5.44  | 5.64  | 6.17  | 6.05  |
| Up | ENSMUSG00000026879  | 1.15 | 1.20E-11 | Gsn           | protein_coding   | 7.51  | 7.27  | 7.60  | 7.41  | 8.73  | 8.39  | 8.64  | 8.58  |
| Up | ENSMUSG00000037752  | 1.15 | 3.22E-05 | Xkr8          | protein_coding   | 4.22  | 4.53  | 4.87  | 5.00  | 5.89  | 5.77  | 5.64  | 5.54  |
| Up | ENSMUSG000000092035 | 1.15 | 1.90E-08 | Peg10         | protein_coding   | 7.56  | 7.92  | 7.09  | 7.52  | 8.47  | 8.93  | 8.03  | 9.09  |
| Up | ENSMUSG00000040724  | 1.15 | 1.96E-63 | Kcna2         | protein_coding   | 11.11 | 11.09 | 10.95 | 10.93 | 12.23 | 12.17 | 12.28 | 12.00 |
| Up | ENSMUSG00000030683  | 1.15 | 1.89E-26 | Sez6l2        | protein_coding   | 10.45 | 10.33 | 10.21 | 10.05 | 11.75 | 11.32 | 11.36 | 11.17 |
| Up | ENSMUSG00000005483  | 1.15 | 7.35E-17 | Dnajb1        | protein_coding   | 7.87  | 7.63  | 7.52  | 7.67  | 9.03  | 8.98  | 8.63  | 8.55  |
| Up | ENSMUSG000000034771 | 1.15 | 1.52E-05 | Tle2          | protein_coding   | 5.57  | 5.26  | 5.45  | 5.50  | 6.84  | 6.17  | 7.02  | 7.02  |
| Up | ENSMUSG000000026209 | 1.15 | 1.40E-12 | Dnppp         | protein_coding   | 6.68  | 6.51  | 6.66  | 6.69  | 7.68  | 7.66  | 7.81  | 7.66  |
| Up | ENSMUSG00000058316  | 1.15 | 1.09E-27 | Stc2f4        | protein_coding   | 8.19  | 7.82  | 8.07  | 7.86  | 9.25  | 8.99  | 9.16  | 9.09  |
| Up | ENSMUSG00000031813  | 1.15 | 5.91E-07 | Mvb12a        | protein_coding   | 5.21  | 5.88  | 6.03  | 5.76  | 6.68  | 6.24  | 7.36  | 6.85  |
| Up | ENSMUSG00000090100  | 1.15 | 2.17E-88 | Tlbc2         | protein_coding   | 10.60 | 10.48 | 10.47 | 10.45 | 11.64 | 11.71 | 11.72 | 11.50 |
| Up | ENSMUSG00000025825  | 1.15 | 3.75E-42 | Iscu          | protein_coding   | 8.53  | 8.55  | 8.66  | 8.55  | 9.61  | 9.78  | 9.85  | 9.58  |
| Up | ENSMUSG00000035835  | 1.15 | 8.54E-20 | Pfpr3         | protein_coding   | 7.19  | 7.32  | 6.95  | 7.06  | 8.10  | 8.42  | 8.27  | 8.23  |
| Up | ENSMUSG00000038295  | 1.15 | 1.25E-05 | Atg9b         | protein_coding   | 4.84  | 4.64  | 5.02  | 4.85  | 5.90  | 5.71  | 5.59  | 6.22  |
| Up | ENSMUSG00000039318  | 1.14 | 9.82E-41 | Rab3gap2      | protein_coding   | 8.67  | 8.92  | 8.53  | 8.52  | 9.76  | 9.67  | 9.90  | 9.68  |
| Up | ENSMUSG000000021234 | 1.14 | 6.98E-16 | Fam161b       | protein_coding   | 6.59  | 6.43  | 6.41  | 6.45  | 7.89  | 7.87  | 7.52  | 7.52  |
| Up | ENSMUSG000000003099 | 1.14 | 2.20E-38 | Ndufa9        | protein_coding   | 8.56  | 8.62  | 8.54  | 8.50  | 9.70  | 9.73  | 9.64  | 9.69  |
| Up | ENSMUSG00000015247  | 1.14 | 3.99E-04 | Nipsnap3b     | protein_coding   | 5.24  | 5.56  | 5.45  | 5.45  | 6.65  | 6.43  | 6.79  | 6.61  |
| Up | ENSMUSG00000048486  | 1.14 | 7.36E-20 | Fitm2         | protein_coding   | 7.67  | 7.75  | 7.47  | 7.61  | 8.74  | 8.81  | 8.81  | 8.55  |
| Up | ENSMUSG000000052353 | 1.14 | 7.82E-23 | Cemip         | protein_coding   | 7.52  | 7.42  | 7.67  | 7.64  | 8.68  | 8.46  | 8.66  | 8.72  |
| Up | ENSMUSG000000021990 | 1.14 | 5.55E-10 | Cign          | protein_coding   | 6.67  | 6.58  | 6.63  | 6.34  | 7.90  | 7.77  | 7.60  | 7.36  |
| Up | ENSMUSG000000053475 | 1.14 | 4.85E-03 | Tnfrsf9       | protein_coding   | 5.26  | 5.52  | 5.52  | 5.22  | 6.35  | 6.06  | 5.84  | 6.31  |
| Up | ENSMUSG00000058622  | 1.14 | 1.31E-32 | Spock1        | protein_coding   | 10.32 | 10.25 | 10.27 | 10.20 | 11.38 | 11.36 | 11.63 | 11.18 |
| Up | ENSMUSG00000015217  | 1.14 | 2.84E-10 | Hmgb3         | protein_coding   | 6.16  | 6.25  | 6.82  | 6.60  | 7.51  | 7.42  | 7.78  | 7.61  |
| Up | ENSMUSG00000041124  | 1.14 | 6.30E-84 | Msantd4       | protein_coding   | 9.06  | 9.10  | 9.06  | 9.00  | 10.15 | 10.16 | 10.21 | 10.21 |
| Up | ENSMUSG00000091811  | 1.14 | 9.66E-14 | Inafm1        | protein_coding   | 6.21  | 6.45  | 6.65  | 6.39  | 7.38  | 7.49  | 7.87  | 7.34  |
| Up | ENSMUSG00000024941  | 1.14 | 1.26E-37 | Scyl1         | protein_coding   | 8.31  | 8.22  | 8.31  | 8.27  | 9.35  | 9.42  | 9.57  | 9.26  |
| Up | ENSMUSG00000023236  | 1.14 | 2.58E-40 | Scg5          | protein_coding   | 9.27  | 9.16  | 9.20  | 9.21  | 10.29 | 10.19 | 10.54 | 10.32 |
| Up | ENSMUSG000000027406 | 1.14 | 5.05E-79 | Idh3b         | protein_coding   | 10.01 | 9.99  | 9.93  | 9.94  | 11.00 | 11.14 | 11.14 | 11.07 |
| Up | ENSMUSG00000039781  | 1.14 | 2.39E-17 | Cep131        | protein_coding   | 6.69  | 6.76  | 7.07  | 6.61  | 7.72  | 7.99  | 7.94  | 7.94  |
| Up | ENSMUSG000000068663 | 1.13 | 7.94E-43 | Clec16a       | protein_coding   | 9.30  | 9.25  | 9.40  | 9.12  | 10.41 | 10.39 | 10.58 | 10.21 |
| Up | ENSMUSG000000024423 | 1.13 | 1.20E-52 | Impact        | protein_coding   | 10.24 | 10.36 | 10.15 | 10.31 | 11.22 | 11.51 | 11.46 | 11.39 |
| Up | ENSMUSG000000034593 | 1.13 | 1.00E-45 | Myo5a         | protein_coding   | 11.36 | 11.34 | 11.20 | 11.15 | 12.48 | 12.40 | 12.56 | 12.14 |
| Up | ENSMUSG000000004267 | 1.13 | 1.41E-52 | Eno2          | protein_coding   | 11.29 | 11.17 | 11.20 | 11.14 | 12.35 | 12.45 | 12.35 | 12.17 |
| Up | ENSMUSG000000019828 | 1.13 | 3.69E-49 | Cnm1          | protein_coding</ |       |       |       |       |       |       |       |       |

|    |                    |      |           |               |                |       |       |       |       |       |       |       |       |
|----|--------------------|------|-----------|---------------|----------------|-------|-------|-------|-------|-------|-------|-------|-------|
| Up | ENSMUSG00000020366 | 1.13 | 2.49E-39  | Mapk9         | protein_coding | 10.11 | 10.14 | 10.17 | 10.28 | 11.13 | 11.33 | 11.51 | 11.22 |
| Up | ENSMUSG00000027384 | 1.13 | 5.10E-29  | Ndufaf5       | protein_coding | 7.60  | 7.51  | 7.55  | 7.26  | 8.61  | 8.66  | 8.58  | 8.53  |
| Up | ENSMUSG00000028975 | 1.13 | 1.75E-24  | Pex14         | protein_coding | 7.77  | 7.55  | 7.73  | 7.74  | 8.88  | 8.84  | 8.90  | 8.74  |
| Up | ENSMUSG00000023266 | 1.13 | 4.62E-09  | Frs3          | protein_coding | 6.43  | 6.65  | 6.39  | 6.70  | 7.90  | 7.70  | 7.34  | 7.59  |
| Up | ENSMUSG00000054453 | 1.13 | 2.34E-14  | Syt15         | protein_coding | 5.94  | 6.26  | 6.12  | 6.39  | 7.47  | 7.23  | 7.29  | 7.08  |
| Up | ENSMUSG00000075702 | 1.13 | 4.06E-31  | Selenom       | protein_coding | 8.35  | 8.14  | 8.47  | 8.27  | 9.59  | 9.39  | 9.41  | 9.32  |
| Up | ENSMUSG00000037169 | 1.13 | 1.14E-12  | Myo1          | protein_coding | 5.70  | 5.93  | 5.78  | 5.96  | 6.98  | 6.98  | 7.03  | 6.51  |
| Up | ENSMUSG00000027195 | 1.13 | 6.14E-24  | Hsd17b12      | protein_coding | 7.59  | 7.71  | 8.00  | 8.15  | 8.96  | 9.06  | 9.26  | 8.94  |
| Up | ENSMUSG00000021141 | 1.13 | 1.29E-05  | Pxdc1         | protein_coding | 5.21  | 5.38  | 5.48  | 5.44  | 6.32  | 6.63  | 6.11  | 6.58  |
| Up | ENSMUSG00000027134 | 1.13 | 8.45E-36  | Lpcat4        | protein_coding | 7.88  | 8.03  | 7.90  | 7.88  | 9.01  | 9.17  | 9.09  | 8.86  |
| Up | ENSMUSG00000028883 | 1.13 | 4.73E-09  | Sema3a        | protein_coding | 5.96  | 5.97  | 5.85  | 6.53  | 7.42  | 6.52  | 7.28  | 7.35  |
| Up | ENSMUSG00000027951 | 1.13 | 3.30E-36  | Adar          | protein_coding | 9.36  | 9.44  | 9.27  | 9.14  | 10.48 | 10.58 | 10.37 | 10.26 |
| Up | ENSMUSG00000022555 | 1.13 | 4.81E-08  | Dgat1         | protein_coding | 5.23  | 5.97  | 5.59  | 5.40  | 6.31  | 7.11  | 6.48  | 6.48  |
| Up | ENSMUSG00000036333 | 1.12 | 1.95E-56  | Kidins220     | protein_coding | 10.92 | 10.77 | 10.77 | 10.68 | 11.97 | 11.89 | 11.91 | 11.87 |
| Up | ENSMUSG00000040018 | 1.12 | 8.65E-20  | Cox15         | protein_coding | 7.56  | 7.44  | 7.27  | 7.23  | 8.64  | 8.23  | 8.67  | 8.35  |
| Up | ENSMUSG00000005045 | 1.12 | 1.07E-48  | Chd5          | protein_coding | 10.75 | 10.68 | 10.65 | 10.56 | 11.78 | 11.84 | 11.82 | 11.67 |
| Up | ENSMUSG00000025266 | 1.12 | 7.07E-57  | Gnl3          | protein_coding | 10.00 | 10.24 | 9.99  | 10.21 | 11.12 | 11.26 | 11.29 | 11.26 |
| Up | ENSMUSG00000045975 | 1.12 | 5.45E-14  | C2cd2         | protein_coding | 6.67  | 6.64  | 6.71  | 6.60  | 7.82  | 7.92  | 7.56  | 7.66  |
| Up | ENSMUSG00000033597 | 1.12 | 6.04E-44  | Caskin1       | protein_coding | 9.63  | 9.58  | 9.44  | 9.37  | 10.63 | 10.62 | 10.74 | 10.50 |
| Up | ENSMUSG00000047495 | 1.12 | 2.29E-122 | Dlgap2        | protein_coding | 9.47  | 9.45  | 9.50  | 9.42  | 10.62 | 10.58 | 10.57 | 10.52 |
| Up | ENSMUSG00000029309 | 1.12 | 2.49E-49  | Sparc1        | protein_coding | 12.40 | 12.42 | 12.35 | 12.26 | 13.53 | 13.46 | 13.58 | 13.31 |
| Up | ENSMUSG00000115232 | 1.12 | 1.45E-14  | Gm49378       | protein_coding | 7.57  | 7.60  | 7.61  | 7.28  | 8.48  | 8.51  | 8.92  | 8.52  |
| Up | ENSMUSG00000023909 | 1.12 | 4.78E-25  | Paqr4         | protein_coding | 8.51  | 8.44  | 8.40  | 8.27  | 9.80  | 9.58  | 9.25  | 9.36  |
| Up | ENSMUSG00000001520 | 1.11 | 2.74E-14  | Nrip2         | protein_coding | 6.69  | 6.52  | 6.54  | 6.83  | 7.91  | 7.68  | 7.81  | 7.51  |
| Up | ENSMUSG00000020230 | 1.11 | 1.87E-19  | Prrt2         | protein_coding | 8.09  | 8.22  | 8.15  | 8.09  | 8.87  | 9.45  | 9.26  | 9.32  |
| Up | ENSMUSG00000002661 | 1.11 | 2.63E-05  | Alkbh7        | protein_coding | 4.26  | 4.56  | 4.85  | 4.89  | 5.49  | 5.77  | 5.46  | 5.82  |
| Up | ENSMUSG00000035969 | 1.11 | 1.33E-32  | Rusc2         | protein_coding | 9.08  | 9.07  | 8.82  | 8.73  | 9.92  | 9.92  | 10.25 | 9.94  |
| Up | ENSMUSG00000002844 | 1.11 | 1.63E-20  | Adprh         | protein_coding | 7.86  | 7.66  | 8.09  | 7.90  | 8.89  | 8.83  | 9.16  | 9.03  |
| Up | ENSMUSG00000035239 | 1.11 | 4.01E-03  | Neu3          | protein_coding | 4.36  | 4.31  | 5.00  | 4.28  | 6.35  | 4.99  | 5.10  | 4.98  |
| Up | ENSMUSG00000025475 | 1.11 | 1.76E-18  | Adgra1        | protein_coding | 8.96  | 8.99  | 8.65  | 8.79  | 9.91  | 10.08 | 10.00 | 9.81  |
| Up | ENSMUSG00000020664 | 1.11 | 3.06E-57  | Did           | protein_coding | 8.90  | 8.95  | 8.98  | 8.98  | 10.02 | 10.10 | 10.20 | 9.87  |
| Up | ENSMUSG00000034403 | 1.11 | 3.87E-67  | Pja1          | protein_coding | 9.59  | 9.71  | 9.59  | 9.54  | 10.68 | 10.76 | 10.77 | 10.64 |
| Up | ENSMUSG00000020374 | 1.11 | 6.39E-11  | Rasgef1c      | protein_coding | 4.77  | 4.97  | 4.70  | 4.69  | 5.71  | 5.96  | 6.07  | 5.81  |
| Up | ENSMUSG00000034936 | 1.11 | 1.97E-06  | Arcp1         | protein_coding | 5.81  | 5.77  | 5.59  | 5.48  | 6.91  | 6.82  | 6.79  | 6.79  |
| Up | ENSMUSG00000041632 | 1.10 | 3.42E-14  | Mrs27         | protein_coding | 6.71  | 6.55  | 6.64  | 6.65  | 7.90  | 7.70  | 7.79  | 7.41  |
| Up | ENSMUSG00000025964 | 1.10 | 5.65E-69  | Adam23        | protein_coding | 9.99  | 10.07 | 10.15 | 10.12 | 11.16 | 11.17 | 11.34 | 11.04 |
| Up | ENSMUSG00000019210 | 1.10 | 5.90E-60  | Atp6v1e1      | protein_coding | 9.94  | 9.80  | 9.93  | 9.97  | 11.13 | 10.96 | 11.10 | 10.84 |
| Up | ENSMUSG00000042524 | 1.10 | 4.34E-12  | Sun2          | protein_coding | 6.98  | 7.03  | 6.97  | 6.69  | 8.32  | 7.94  | 7.85  | 7.85  |
| Up | ENSMUSG00000021548 | 1.10 | 1.22E-23  | Ccnh          | protein_coding | 7.82  | 7.97  | 7.95  | 8.08  | 9.01  | 8.98  | 9.25  | 8.92  |
| Up | ENSMUSG00000042109 | 1.10 | 5.39E-19  | Csdc2         | protein_coding | 9.17  | 9.24  | 8.82  | 9.05  | 10.26 | 10.43 | 9.83  | 10.11 |
| Up | ENSMUSG00000040687 | 1.10 | 3.77E-43  | Madd          | protein_coding | 10.11 | 10.04 | 9.94  | 9.75  | 11.04 | 11.13 | 11.16 | 10.93 |
| Up | ENSMUSG00000001334 | 1.10 | 8.95E-34  | Fndc5         | protein_coding | 9.25  | 9.25  | 9.30  | 9.11  | 10.36 | 10.45 | 10.37 | 10.09 |
| Up | ENSMUSG00000034687 | 1.10 | 1.30E-19  | Fras1         | protein_coding | 8.12  | 7.95  | 8.11  | 8.30  | 9.18  | 8.93  | 9.13  | 9.56  |
| Up | ENSMUSG00000060716 | 1.10 | 3.13E-12  | Plekhh1       | protein_coding | 8.10  | 7.59  | 8.17  | 7.96  | 9.49  | 8.51  | 8.99  | 9.09  |
| Up | ENSMUSG00000062937 | 1.10 | 6.60E-10  | Mtap          | protein_coding | 5.95  | 6.02  | 5.28  | 5.82  | 6.96  | 6.83  | 7.25  | 6.76  |
| Up | ENSMUSG00000022636 | 1.10 | 3.99E-48  | Alcam         | protein_coding | 9.61  | 9.69  | 9.50  | 9.50  | 10.69 | 10.69 | 10.83 | 10.76 |
| Up | ENSMUSG00000020456 | 1.10 | 6.91E-57  | Ogdh          | protein_coding | 10.12 | 9.97  | 10.12 | 10.00 | 11.17 | 11.03 | 11.22 | 10.97 |
| Up | ENSMUSG00000027857 | 1.10 | 1.78E-03  | Tshb          | protein_coding | 3.99  | 4.13  | 4.78  | 4.80  | 5.47  | 5.04  | 5.38  | 5.17  |
| Up | ENSMUSG00000021983 | 1.10 | 7.24E-52  | Atp8a2        | protein_coding | 8.96  | 9.06  | 8.88  | 9.01  | 10.11 | 10.16 | 10.05 | 9.96  |
| Up | ENSMUSG00000018865 | 1.10 | 4.46E-53  | Sult4a1       | protein_coding | 10.48 | 10.44 | 10.62 | 10.35 | 11.52 | 11.57 | 11.74 | 11.45 |
| Up | ENSMUSG00000026797 | 1.10 | 8.65E-65  | Stxbp1        | protein_coding | 11.58 | 11.64 | 11.66 | 11.58 | 12.71 | 12.72 | 12.85 | 12.55 |
| Up | ENSMUSG00000005124 | 1.10 | 3.21E-04  | Ccn4          | protein_coding | 3.81  | 4.17  | 3.60  | 4.28  | 4.59  | 4.64  | 5.33  | 4.85  |
| Up | ENSMUSG00000074811 | 1.10 | 7.17E-05  | Hps6          | protein_coding | 5.10  | 4.79  | 5.38  | 5.11  | 5.86  | 6.09  | 6.53  | 5.71  |
| Up | ENSMUSG00000024966 | 1.09 | 1.14E-24  | Stip1         | protein_coding | 9.74  | 9.62  | 9.24  | 9.34  | 10.76 | 10.68 | 10.52 | 10.35 |
| Up | ENSMUSG00000015016 | 1.09 | 6.43E-16  | Acsf3         | protein_coding | 5.85  | 6.12  | 5.98  | 5.98  | 7.06  | 7.02  | 7.08  | 6.94  |
| Up | ENSMUSG00000027710 | 1.09 | 5.73E-19  | Acad9         | protein_coding | 7.22  | 7.29  | 7.03  | 7.30  | 8.23  | 8.18  | 8.56  | 8.13  |
| Up | ENSMUSG00000021699 | 1.09 | 4.86E-70  | Pde4d         | protein_coding | 8.58  | 8.76  | 8.60  | 8.69  | 9.79  | 9.79  | 9.75  | 9.75  |
| Up | ENSMUSG00000020900 | 1.09 | 6.72E-46  | Myn10         | protein_coding | 10.76 | 10.53 | 10.64 | 10.51 | 11.83 | 11.86 | 11.76 | 11.55 |
| Up | ENSMUSG00000025932 | 1.09 | 2.46E-36  | Fto           | protein_coding | 9.79  | 9.67  | 9.75  | 9.75  | 10.75 | 10.74 | 11.04 | 10.73 |
| Up | ENSMUSG00000053693 | 1.09 | 1.76E-30  | Mas1          | protein_coding | 9.06  | 8.93  | 9.06  | 8.94  | 10.05 | 10.23 | 10.05 | 9.99  |
| Up | ENSMUSG00000043441 | 1.09 | 3.04E-03  | Gpr149        | protein_coding | 4.11  | 4.13  | 4.78  | 4.76  | 5.17  | 5.88  | 5.04  | 5.48  |
| Up | ENSMUSG00000033460 | 1.09 | 3.10E-33  | Armcx1        | protein_coding | 8.48  | 8.51  | 8.42  | 8.58  | 9.35  | 9.80  | 9.62  | 9.51  |
| Up | ENSMUSG00000037977 | 1.09 | 1.51E-03  | 6430571L13Rik | protein_coding | 4.84  | 4.74  | 3.89  | 4.96  | 5.29  | 5.80  | 5.86  | 5.50  |
| Up | ENSMUSG00000005034 | 1.09 | 6.52E-40  | Prkacb        | protein_coding | 10.79 | 10.92 | 10.72 | 11.01 | 11.79 | 12.03 | 11.98 | 12.00 |
| Up | ENSMUSG00000048376 | 1.09 | 4.90E-04  | F2r           | protein_coding | 4.82  | 5.10  | 5.04  | 4.96  | 5.73  | 6.38  | 5.70  | 5.96  |
| Up | ENSMUSG00000043448 | 1.09 | 5.20E-04  | Gjc2          | protein_coding | 5.89  | 5.50  | 5.86  | 6.15  | 7.39  | 6.12  | 6.52  | 7.22  |
| Up | ENSMUSG00000020524 | 1.09 | 3.64E-54  | Gria1         | protein_coding | 12.75 | 12.60 | 12.73 | 12.54 | 13.75 | 13.79 | 13.80 | 13.62 |
| Up | ENSMUSG00000048142 | 1.09 | 6.80E-31  | Nat8l         | protein_coding | 10.50 | 10.49 | 10.49 | 10.18 | 11.54 | 11.57 | 11.56 | 11.35 |
| Up | ENSMUSG00000010914 | 1.09 | 4.36E-28  | Pdhx          | protein_coding | 8.05  | 7.73  | 7.85  | 7.92  | 8.99  | 8.91  | 9.03  | 8.93  |
| Up | ENSMUSG00000034488 | 1.09 | 4.85E-39  | Edil3         | protein_coding | 9.24  | 9.19  | 9.08  | 9.31  | 10.45 | 10.17 | 10.27 | 10.26 |
| Up | ENSMUSG00000020361 | 1.09 | 5.46E-71  | Hspa4         | protein_coding | 10.31 | 10.18 | 10.11 | 10.14 | 11.31 | 11.21 | 11.36 | 11.17 |
| Up | ENSMUSG00000028599 | 1.08 | 2.28E-32  | Osbpl9        | protein_coding | 8.19  | 8.17  | 7.96  | 8.24  | 9.19  | 9.28  | 9.29  | 9.08  |
| Up | ENSMUSG00000027943 | 1.08 | 2.92E-34  | Vsmr2         | protein_coding | 8.56  | 8.27  | 8.52  | 8.37  | 9.37  | 9.44  | 9.36  | 9.58  |
| Up | ENSMUSG00000021820 | 1.08 | 6.86E-47  | Camk2g        | protein_coding | 9.85  | 9.65  | 9.89  | 9.72  | 10.88 | 10.99 | 11.03 | 10.84 |
| Up | ENSMUSG00000027010 | 1.08 | 4.80E-39  | Stc25a12      | protein_coding | 9.39  | 9.46  | 9.45  | 9.45  | 10.39 | 10.54 | 10.76 | 10.31 |
| Up | ENSMUSG00000053297 | 1.08 | 2.20E-14  | Alb54703      | protein_coding | 7.05  | 6.95  | 6.77  | 6.73  | 8.07  | 7.98  | 7.94  | 7.73  |
| Up | ENSMUSG00000017740 | 1.08 | 7.51E-38  | Slc12a5       | protein_coding | 10.77 | 10.49 | 10.63 | 10.45 | 11.74 | 11.69 | 11.67 | 11.57 |
| Up | ENSMUSG00000028865 | 1.08 | 5.00E-03  | Cd164i2       | protein_coding | 4.59  | 4.20  | 3.70  | 3.60  | 5.42  | 4.49  | 4.79  | 4.98  |
| Up | ENSMUSG00000025175 | 1.08 | 3.69E-18  | Fn3k          | protein_coding | 6.89  | 7.06  | 7.11  | 6.85  | 8.22  | 8.13  | 8.03  | 7.70  |
| Up | ENSMUSG00000037625 | 1.08 | 1.97E-05  | Cldn11        | protein_coding | 9.01  | 8.70  | 8.85  | 8.69  | 10.47 | 9.12  | 9.68  | 9.95  |
| Up | ENSMUSG00000078185 | 1.08 | 3.58E-09  | Chml          | protein_coding | 6.72  | 6.69  | 6.63  | 6.77  | 7.32  | 7.70  | 7.99  | 7.69  |
| Up | ENSMUSG00000054708 | 1.07 | 4.42E-17  | Ankrd24       | protein_coding | 7.21  | 7.21  | 7.11  | 7.31  | 7.95  | 8.17  | 8.41  | 8.49  |
| Up | ENSMUSG00000024190 | 1.07 | 2.09E-07  | Dusp1         | protein_coding | 6.12  | 6.71  | 6.04  | 6.62  | 7.07  | 7.69  | 7.62  | 7.62  |
| Up | ENSMUSG00000042744 | 1.07 | 2.09E-46  | Hectd4        | protein_coding | 11.07 | 10.92 | 10.87 | 10.83 | 11.94 | 12.06 | 11.96 | 12.02 |
| Up | ENSMUSG00000006273 | 1.07 | 8.58E-90  | Atp6v1b2      | protein_coding | 10.81 | 10.79 | 10.79 | 10.78 | 11.80 | 11.92 | 11.96 | 11.77 |
| Up | ENSMUSG00000056900 | 1.07 | 2.24E-31  | Usp13         | protein_coding | 7.80  | 7.83  | 7.39  | 7.51  | 8.63  | 8.69  | 8.66  | 8.63  |
|    |                    |      |           |               |                |       |       |       |       |       |       |       |       |

|    |                       |      |          |               |                |       |       |       |       |       |       |       |       |
|----|-----------------------|------|----------|---------------|----------------|-------|-------|-------|-------|-------|-------|-------|-------|
| Up | ENSMUSG00000004815    | 1.07 | 5.15E-21 | Dgkq          | protein_coding | 7.13  | 7.15  | 7.20  | 7.16  | 8.15  | 8.26  | 8.24  | 8.19  |
| Up | ENSMUSG000000031026   | 1.07 | 1.64E-18 | Trim66        | protein_coding | 7.37  | 7.54  | 7.36  | 7.36  | 8.07  | 8.67  | 8.54  | 8.50  |
| Up | ENSMUSG000000024542   | 1.07 | 2.27E-20 | Cep192        | protein_coding | 6.30  | 6.44  | 6.77  | 6.67  | 7.45  | 7.49  | 7.72  | 7.71  |
| Up | ENSMUSG000000009090   | 1.07 | 3.07E-33 | Ap1b1         | protein_coding | 9.46  | 9.37  | 9.46  | 9.30  | 10.56 | 10.44 | 10.55 | 10.30 |
| Up | ENSMUSG000000032452   | 1.07 | 1.48E-33 | Cistin2       | protein_coding | 9.47  | 9.54  | 9.69  | 9.27  | 10.65 | 10.44 | 10.68 | 10.49 |
| Up | ENSMUSG000000039354   | 1.07 | 1.65E-37 | Smarca1       | protein_coding | 8.39  | 8.19  | 8.21  | 8.29  | 9.19  | 9.43  | 9.48  | 9.21  |
| Up | ENSMUSG000000030718   | 1.07 | 3.45E-39 | Plmn1         | protein_coding | 9.58  | 9.53  | 9.43  | 9.36  | 10.49 | 10.57 | 10.49 | 10.40 |
| Up | ENSMUSG000000024740   | 1.07 | 3.39E-37 | Ddb1          | protein_coding | 9.39  | 9.25  | 9.20  | 9.16  | 10.35 | 10.25 | 10.44 | 10.21 |
| Up | ENSMUSG000000002379   | 1.07 | 1.99E-15 | Ndufa11       | protein_coding | 7.90  | 7.91  | 7.85  | 7.96  | 9.11  | 8.82  | 9.13  | 8.76  |
| Up | ENSMUSG000000071266   | 1.07 | 1.64E-11 | Zfp946        | protein_coding | 6.29  | 6.61  | 6.57  | 6.63  | 7.34  | 7.75  | 7.68  | 7.45  |
| Up | ENSMUSG000000045237   | 1.07 | 7.09E-04 | 1110012L19Rik | protein_coding | 5.10  | 4.58  | 4.80  | 4.91  | 5.32  | 6.06  | 6.14  | 5.60  |
| Up | ENSMUSG000000025007   | 1.07 | 4.37E-14 | Aldh18a1      | protein_coding | 6.20  | 6.20  | 6.33  | 6.54  | 7.21  | 7.36  | 7.42  | 7.41  |
| Up | ENSMUSG000000029547   | 1.06 | 6.57E-34 | Ints1         | protein_coding | 8.26  | 8.24  | 8.21  | 8.29  | 9.41  | 9.26  | 9.35  | 9.21  |
| Up | ENSMUSG000000038267   | 1.06 | 5.96E-32 | Slc22a23      | protein_coding | 8.53  | 8.32  | 8.47  | 8.28  | 9.39  | 9.42  | 9.64  | 9.35  |
| Up | ENSMUSG000000037846   | 1.06 | 1.88E-07 | Rtkn2         | protein_coding | 5.23  | 5.00  | 4.89  | 5.44  | 6.34  | 5.71  | 6.31  | 6.09  |
| Up | ENSMUSG000000060279   | 1.06 | 7.21E-41 | Ap2a1         | protein_coding | 9.86  | 9.93  | 9.93  | 9.70  | 10.93 | 10.94 | 10.94 | 10.86 |
| Up | ENSMUSG000000032313   | 1.06 | 9.66E-05 | Tmem266       | protein_coding | 5.08  | 5.25  | 4.52  | 5.40  | 6.56  | 6.03  | 5.56  | 5.95  |
| Up | ENSMUSG000000024944   | 1.06 | 5.89E-17 | Arl2          | protein_coding | 7.12  | 7.39  | 7.41  | 7.23  | 8.53  | 8.30  | 8.23  | 8.27  |
| Up | ENSMUSG000000045532   | 1.06 | 1.77E-08 | Ctcf1         | protein_coding | 5.78  | 6.10  | 5.81  | 5.98  | 7.21  | 6.91  | 6.66  | 6.90  |
| Up | ENSMUSG000000061904   | 1.06 | 7.59E-41 | Slc25a3       | protein_coding | 10.06 | 10.05 | 9.92  | 9.92  | 10.94 | 11.17 | 11.17 | 10.89 |
| Up | ENSMUSG000000047988   | 1.06 | 2.68E-15 | 4933428G20Rik | protein_coding | 6.51  | 6.27  | 6.39  | 6.11  | 7.50  | 7.06  | 7.52  | 7.27  |
| Up | ENSMUSG000000035202   | 1.06 | 2.03E-09 | Lars2         | protein_coding | 11.96 | 11.95 | 11.98 | 12.08 | 13.38 | 12.71 | 13.24 | 12.77 |
| Up | ENSMUSG000000013367   | 1.06 | 2.94E-17 | Igln5         | protein_coding | 7.62  | 7.35  | 7.64  | 7.37  | 8.67  | 8.56  | 8.58  | 8.35  |
| Up | ENSMUSG000000038664   | 1.06 | 3.78E-42 | Herc1         | protein_coding | 10.55 | 10.51 | 10.43 | 10.44 | 11.52 | 11.55 | 11.44 | 11.64 |
| Up | ENSMUSG000000025613   | 1.06 | 5.92E-29 | Cct8          | protein_coding | 9.02  | 9.12  | 8.92  | 9.06  | 10.06 | 10.25 | 10.01 | 10.00 |
| Up | ENSMUSG000000019505   | 1.06 | 3.57E-18 | Ubb           | protein_coding | 11.14 | 11.09 | 11.07 | 11.00 | 12.22 | 11.99 | 12.25 | 12.04 |
| Up | ENSMUSG000000038462   | 1.06 | 4.19E-44 | Uqcrls1       | protein_coding | 8.74  | 8.73  | 8.82  | 8.65  | 9.70  | 9.94  | 9.78  | 9.72  |
| Up | ENSMUSG000000038429   | 1.06 | 1.65E-40 | Usp5          | protein_coding | 9.10  | 9.04  | 9.03  | 8.85  | 9.95  | 10.06 | 10.13 | 10.07 |
| Up | ENSMUSG000000023456   | 1.06 | 1.41E-85 | Tpi1          | protein_coding | 10.26 | 10.36 | 10.26 | 10.21 | 11.30 | 11.36 | 11.38 | 11.26 |
| Up | ENSMUSG000000034714   | 1.06 | 1.62E-09 | Tyh2          | protein_coding | 7.67  | 7.66  | 7.84  | 7.42  | 9.06  | 7.93  | 8.67  | 8.88  |
| Up | ENSMUSG000000025855   | 1.06 | 4.45E-41 | Prkar1b       | protein_coding | 11.02 | 11.09 | 10.97 | 10.82 | 11.93 | 12.13 | 12.13 | 11.92 |
| Up | ENSMUSG000000045929   | 1.06 | 2.54E-06 | Gm20715       | protein_coding | 5.34  | 5.28  | 5.40  | 5.12  | 6.13  | 5.89  | 6.40  | 6.36  |
| Up | ENSMUSG000000022629   | 1.06 | 1.06E-51 | Klf21a        | protein_coding | 10.85 | 10.60 | 10.65 | 10.61 | 11.80 | 11.70 | 11.75 | 11.69 |
| Up | ENSMUSG000000007470   | 1.05 | 1.15E-42 | Igfb1         | protein_coding | 8.57  | 8.32  | 8.41  | 8.35  | 9.50  | 9.47  | 9.54  | 9.51  |
| Up | ENSMUSG000000040472   | 1.05 | 4.98E-07 | Rabggt2       | protein_coding | 6.44  | 6.61  | 6.57  | 6.21  | 7.73  | 7.19  | 7.84  | 7.01  |
| Up | ENSMUSG000000050705   | 1.05 | 1.47E-27 | 2310061104Rik | protein_coding | 7.45  | 7.62  | 7.55  | 7.53  | 8.46  | 8.53  | 8.73  | 8.58  |
| Up | ENSMUSG000000027254   | 1.05 | 1.25E-26 | Map1a         | protein_coding | 12.85 | 12.64 | 12.67 | 12.43 | 13.91 | 13.63 | 13.79 | 13.47 |
| Up | ENSMUSG000000003234   | 1.05 | 2.52E-23 | Abcf3         | protein_coding | 7.64  | 7.59  | 7.84  | 7.47  | 8.75  | 8.62  | 8.78  | 8.61  |
| Up | ENSMUSG000000037410   | 1.05 | 6.45E-18 | Tbc1d2b       | protein_coding | 6.54  | 6.51  | 6.35  | 6.69  | 7.57  | 7.37  | 7.65  | 7.58  |
| Up | ENSMUSG000000044252   | 1.05 | 6.90E-40 | Ospbl1a       | protein_coding | 9.98  | 10.14 | 9.94  | 10.03 | 11.18 | 10.95 | 11.17 | 10.97 |
| Up | ENSMUSG000000039648   | 1.05 | 1.17E-06 | Kyat1         | protein_coding | 5.19  | 4.95  | 5.68  | 5.22  | 6.23  | 6.18  | 6.59  | 5.95  |
| Up | ENSMUSG000000019647   | 1.05 | 1.46E-13 | Sema6a        | protein_coding | 8.03  | 7.95  | 8.14  | 8.44  | 9.32  | 8.77  | 9.16  | 9.45  |
| Up | ENSMUSG000000021700   | 1.05 | 7.58E-45 | Rab3c         | protein_coding | 11.90 | 11.96 | 11.80 | 11.89 | 12.86 | 13.02 | 13.02 | 12.85 |
| Up | ENSMUSG000000061013   | 1.05 | 2.08E-12 | Mxk           | protein_coding | 6.39  | 6.45  | 6.45  | 6.70  | 7.55  | 7.81  | 7.42  | 7.38  |
| Up | ENSMUSG000000015806   | 1.05 | 1.97E-15 | Qdpr          | protein_coding | 9.22  | 8.94  | 9.22  | 9.19  | 10.43 | 9.61  | 10.19 | 10.41 |
| Up | ENSMUSG000000001666   | 1.05 | 8.14E-12 | Ddt1          | protein_coding | 6.66  | 6.43  | 6.57  | 6.37  | 7.33  | 7.56  | 7.86  | 7.27  |
| Up | ENSMUSG0000000023937  | 1.05 | 1.97E-09 | Plec3         | protein_coding | 5.53  | 5.52  | 5.26  | 5.76  | 6.80  | 6.54  | 6.88  | 6.48  |
| Up | ENSMUSG000000020189   | 1.05 | 6.27E-54 | Ospbl8        | protein_coding | 9.32  | 9.46  | 9.35  | 9.52  | 10.35 | 10.57 | 10.50 | 10.39 |
| Up | ENSMUSG000000021476   | 1.05 | 2.17E-80 | Habp4         | protein_coding | 10.67 | 10.74 | 10.69 | 10.56 | 11.70 | 11.76 | 11.75 | 11.63 |
| Up | ENSMUSG000000031782   | 1.05 | 1.89E-19 | Cog9          | protein_coding | 7.58  | 7.57  | 8.00  | 7.77  | 8.66  | 8.92  | 8.85  | 8.64  |
| Up | ENSMUSG000000063687   | 1.05 | 3.95E-03 | Pcdhb5        | protein_coding | 4.70  | 4.64  | 4.34  | 4.91  | 5.99  | 5.38  | 5.04  | 5.75  |
| Up | ENSMUSG000000050947   | 1.05 | 9.37E-32 | Amigo1        | protein_coding | 9.14  | 9.16  | 9.09  | 8.94  | 10.21 | 10.18 | 10.10 | 9.99  |
| Up | ENSMUSG000000029148   | 1.04 | 4.19E-40 | Nrbp1         | protein_coding | 8.24  | 8.30  | 8.29  | 8.28  | 9.28  | 9.29  | 9.43  | 9.20  |
| Up | ENSMUSG000000000308   | 1.04 | 1.63E-28 | Ckmt1         | protein_coding | 9.48  | 9.59  | 9.41  | 9.39  | 10.50 | 10.56 | 10.41 | 10.56 |
| Up | ENSMUSG000000028680   | 1.04 | 4.63E-07 | Plk3          | protein_coding | 5.55  | 6.15  | 5.85  | 5.46  | 6.56  | 7.17  | 6.59  | 6.64  |
| Up | ENSMUSG000000025757   | 1.04 | 7.77E-34 | Hspa4l        | protein_coding | 10.30 | 10.40 | 9.92  | 10.07 | 11.29 | 11.34 | 11.19 | 11.07 |
| Up | ENSMUSG000000028431   | 1.04 | 6.07E-47 | Efp1          | protein_coding | 7.86  | 7.79  | 7.71  | 7.81  | 8.73  | 8.79  | 8.94  | 8.83  |
| Up | ENSMUSG000000038886   | 1.04 | 3.24E-82 | Man2a2        | protein_coding | 10.08 | 10.19 | 10.06 | 10.02 | 11.17 | 11.11 | 11.17 | 11.05 |
| Up | ENSMUSG000000004446   | 1.04 | 2.36E-10 | Bid1          | protein_coding | 6.22  | 6.12  | 6.65  | 5.97  | 7.31  | 7.09  | 7.42  | 7.22  |
| Up | ENSMUSG000000041606   | 1.04 | 1.15E-06 | Entpd3        | protein_coding | 5.34  | 5.58  | 5.26  | 5.38  | 6.05  | 6.26  | 6.81  | 6.20  |
| Up | ENSMUSG000000036026   | 1.04 | 1.64E-52 | Tmem63b       | protein_coding | 8.82  | 8.87  | 8.88  | 8.85  | 9.95  | 9.69  | 9.96  | 9.75  |
| Up | ENSMUSG000000028224   | 1.04 | 7.49E-13 | Nbn           | protein_coding | 6.62  | 6.76  | 6.64  | 6.45  | 7.81  | 7.66  | 7.29  | 7.69  |
| Up | ENSMUSG000000029126   | 1.04 | 2.70E-28 | Nsg1          | protein_coding | 9.75  | 9.73  | 9.77  | 9.68  | 10.54 | 10.91 | 10.88 | 10.72 |
| Up | ENSMUSG000000027359   | 1.04 | 2.71E-09 | Slc27a2       | protein_coding | 5.79  | 5.38  | 5.59  | 5.14  | 6.48  | 6.53  | 6.29  | 6.53  |
| Up | ENSMUSG000000034949   | 1.04 | 6.06E-13 | Zfr2          | protein_coding | 7.74  | 7.89  | 7.81  | 7.56  | 8.95  | 8.93  | 8.57  | 8.61  |
| Up | ENSMUSG000000032855   | 1.04 | 3.67E-36 | Pkd1          | protein_coding | 9.07  | 8.75  | 8.79  | 8.79  | 9.89  | 9.96  | 9.91  | 10.00 |
| Up | ENSMUSG000000062591   | 1.04 | 7.68E-16 | Tubb4a        | protein_coding | 11.40 | 11.26 | 11.39 | 11.42 | 12.34 | 12.11 | 12.55 | 12.57 |
| Up | ENSMUSG000000021278   | 1.04 | 1.20E-03 | Amn           | protein_coding | 3.95  | 4.27  | 4.49  | 3.98  | 5.07  | 5.52  | 4.95  | 4.46  |
| Up | ENSMUSG000000025151   | 1.03 | 9.86E-29 | Maged1        | protein_coding | 10.56 | 10.50 | 10.52 | 10.39 | 11.44 | 11.66 | 11.57 | 11.43 |
| Up | ENSMUSG000000026830   | 1.03 | 1.35E-11 | Ernn          | protein_coding | 9.15  | 9.06  | 8.76  | 9.14  | 10.43 | 9.52  | 10.31 | 10.30 |
| Up | ENSMUSG0000000027371  | 1.03 | 1.28E-07 | Fahd2a        | protein_coding | 5.74  | 5.80  | 5.45  | 5.57  | 6.76  | 6.60  | 6.51  | 6.58  |
| Up | ENSMUSG000000060450   | 1.03 | 6.01E-41 | Rnf14         | protein_coding | 10.85 | 10.81 | 10.73 | 10.76 | 11.75 | 11.93 | 11.82 | 11.77 |
| Up | ENSMUSG000000003957   | 1.03 | 6.31E-06 | Sh2b2         | protein_coding | 5.41  | 5.02  | 5.14  | 5.14  | 6.56  | 6.07  | 6.11  | 6.11  |
| Up | ENSMUSG00000000364222 | 1.03 | 9.82E-14 | Pcdhb6        | protein_coding | 7.54  | 7.50  | 7.65  | 7.39  | 8.40  | 8.03  | 8.48  | 8.78  |
| Up | ENSMUSG000000021994   | 1.03 | 5.31E-13 | Wnt5a         | protein_coding | 6.58  | 6.90  | 6.57  | 6.49  | 7.77  | 7.44  | 7.76  | 7.46  |
| Up | ENSMUSG000000052337   | 1.03 | 1.20E-29 | Immt          | protein_coding | 9.06  | 9.14  | 8.93  | 8.88  | 10.13 | 9.93  | 10.14 | 9.91  |
| Up | ENSMUSG000000039699   | 1.03 | 2.51E-06 | Batf2         | protein_coding | 4.95  | 5.44  | 5.43  | 5.42  | 6.31  | 6.14  | 6.42  | 6.15  |
| Up | ENSMUSG000000043940   | 1.03 | 1.41E-33 | Wdfy3         | protein_coding | 10.88 | 10.81 | 10.73 | 10.72 | 11.84 | 11.75 | 11.85 | 11.82 |
| Up | ENSMUSG000000038264   | 1.03 | 2.46E-24 | Sema7a        | protein_coding | 8.84  | 8.55  | 8.96  | 8.61  | 9.88  | 9.76  | 9.89  | 9.53  |
| Up | ENSMUSG000000038453   | 1.03 | 1.19E-58 | Scrn1         | protein_coding | 10.82 | 10.78 | 10.79 | 10.74 | 11.86 | 11.78 | 11.88 | 11.72 |
| Up | ENSMUSG000000025905   | 1.03 | 4.15E-03 | Oprk1         | protein_coding | 4.29  | 4.13  | 4.46  | 4.34  | 5.34  | 5.34  | 5.87  | 4.74  |
| Up | ENSMUSG000000074582   | 1.03 | 1.15E-36 | Arfgf2        | protein_coding | 8.79  | 8.90  | 8.81  | 8.94  | 9.97  | 9.95  | 9.78  | 9.81  |
| Up | ENSMUSG000000010057   | 1.03 | 8.31E-09 | Npri2         | protein_coding | 6.50  | 6.05  | 6.14  | 6.21  | 7.21  | 7.10  | 7.44  | 7.00  |
| Up | ENSMUSG000000024430   | 1.03 | 1.44E-04 | Cabyr         | protein_coding | 5.53  | 5.77  | 5.27  | 5.50  | 5.59  | 7.27  | 6.31  | 6.27  |
| Up | ENSMUSG000000020086   | 1.03 | 1.14E-13 | H2afy2        | protein_coding | 6.27  | 6.61  | 6.23  | 6.46  | 7.61  | 7.27  | 7.15  | 7.36  |
| Up | ENSMUSG000000015656   | 1.03 | 9.70E    |               |                |       |       |       |       |       |       |       |       |

|    |                      |      |          |               |                |       |       |       |       |       |       |       |       |
|----|----------------------|------|----------|---------------|----------------|-------|-------|-------|-------|-------|-------|-------|-------|
| Up | ENSMUSG00000022571   | 1.03 | 1.28E-06 | Pycl1         | protein_coding | 5.65  | 5.66  | 5.53  | 5.70  | 6.91  | 6.80  | 6.04  | 6.50  |
| Up | ENSMUSG00000035849   | 1.02 | 2.22E-21 | Krt222        | protein_coding | 8.59  | 8.56  | 8.78  | 8.46  | 9.68  | 9.50  | 9.76  | 9.52  |
| Up | ENSMUSG00000042105   | 1.02 | 6.31E-54 | Inpp5f        | protein_coding | 9.49  | 9.55  | 9.63  | 9.61  | 10.58 | 10.55 | 10.74 | 10.49 |
| Up | ENSMUSG000000027194  | 1.02 | 2.39E-24 | Ttc17         | protein_coding | 7.62  | 7.60  | 7.91  | 7.78  | 8.80  | 8.52  | 8.91  | 8.72  |
| Up | ENSMUSG000000043311  | 1.02 | 4.16E-10 | D17H6SS3E     | protein_coding | 6.18  | 6.39  | 6.26  | 6.05  | 7.47  | 7.11  | 7.23  | 6.98  |
| Up | ENSMUSG000000007476  | 1.02 | 3.37E-36 | Lrrc8a        | protein_coding | 8.76  | 8.84  | 8.84  | 8.55  | 9.86  | 9.82  | 9.81  | 9.57  |
| Up | ENSMUSG000000036588  | 1.02 | 6.08E-16 | Clec2l        | protein_coding | 7.59  | 7.65  | 7.67  | 7.44  | 8.42  | 8.25  | 8.42  | 8.40  |
| Up | ENSMUSG000000044149  | 1.02 | 3.71E-18 | Nkrf          | protein_coding | 7.26  | 7.32  | 7.16  | 7.39  | 8.25  | 8.24  | 8.36  | 8.30  |
| Up | ENSMUSG000000052928  | 1.02 | 6.64E-24 | Ctlf          | protein_coding | 9.50  | 9.48  | 9.56  | 9.23  | 10.48 | 10.56 | 10.51 | 10.30 |
| Up | ENSMUSG000000041303  | 1.02 | 2.74E-21 | Gf3c3         | protein_coding | 7.32  | 7.60  | 7.23  | 7.37  | 8.39  | 8.56  | 8.40  | 8.19  |
| Up | ENSMUSG000000038256  | 1.02 | 4.63E-90 | Bcl9          | protein_coding | 9.04  | 9.00  | 9.03  | 9.00  | 10.07 | 10.03 | 10.10 | 9.94  |
| Up | ENSMUSG000000034854  | 1.02 | 3.54E-17 | Mfsd12        | protein_coding | 7.50  | 7.40  | 7.58  | 7.43  | 8.60  | 8.54  | 8.55  | 8.22  |
| Up | ENSMUSG000000062526  | 1.02 | 9.83E-27 | Mppe1         | protein_coding | 7.87  | 8.24  | 7.97  | 8.18  | 8.97  | 9.17  | 9.18  | 8.99  |
| Up | ENSMUSG00000001380   | 1.02 | 1.19E-35 | Hars          | protein_coding | 8.86  | 8.69  | 8.94  | 8.81  | 9.92  | 9.87  | 9.87  | 9.69  |
| Up | ENSMUSG000000096054  | 1.02 | 8.81E-29 | Syne1         | protein_coding | 12.44 | 12.34 | 12.31 | 12.25 | 13.32 | 13.30 | 13.18 | 13.60 |
| Up | ENSMUSG000000020843  | 1.02 | 1.06E-09 | Timm22        | protein_coding | 6.97  | 6.63  | 6.66  | 6.88  | 7.59  | 7.92  | 7.93  | 7.67  |
| Up | ENSMUSG000000002010  | 1.02 | 1.88E-35 | Idh3g         | protein_coding | 8.22  | 8.27  | 8.13  | 8.21  | 9.16  | 9.24  | 9.39  | 9.07  |
| Up | ENSMUSG000000003644  | 1.02 | 8.11E-08 | Rps8ka1       | protein_coding | 6.22  | 5.88  | 5.86  | 6.18  | 6.78  | 6.77  | 7.43  | 6.99  |
| Up | ENSMUSG0000000054013 | 1.02 | 1.22E-47 | Tmem179       | protein_coding | 8.14  | 8.22  | 8.33  | 8.09  | 9.18  | 9.16  | 9.31  | 9.16  |
| Up | ENSMUSG000000042529  | 1.02 | 1.07E-05 | Kcnj12        | protein_coding | 5.82  | 6.06  | 5.40  | 5.48  | 6.86  | 6.74  | 6.30  | 6.74  |
| Up | ENSMUSG000000079020  | 1.02 | 5.67E-25 | Slc45a4       | protein_coding | 8.70  | 8.36  | 8.25  | 8.32  | 9.53  | 9.35  | 9.27  | 9.27  |
| Up | ENSMUSG000000042148  | 1.02 | 2.60E-19 | Cox10         | protein_coding | 7.06  | 7.04  | 7.14  | 7.07  | 8.25  | 8.24  | 7.91  | 7.86  |
| Up | ENSMUSG000000029752  | 1.02 | 1.32E-15 | Asns          | protein_coding | 7.87  | 8.04  | 7.89  | 7.82  | 8.76  | 8.84  | 9.28  | 8.68  |
| Up | ENSMUSG000000052364  | 1.02 | 2.73E-13 | B630019K06Rik | protein_coding | 7.29  | 7.37  | 6.99  | 7.31  | 8.33  | 8.40  | 8.15  | 8.08  |
| Up | ENSMUSG000000019087  | 1.02 | 8.88E-31 | Atp6ap1       | protein_coding | 9.42  | 9.44  | 9.39  | 9.38  | 10.36 | 10.52 | 10.53 | 10.25 |
| Up | ENSMUSG000000017167  | 1.02 | 2.05E-22 | Cntnap1       | protein_coding | 9.85  | 9.66  | 9.76  | 9.59  | 10.72 | 10.71 | 10.94 | 10.52 |
| Up | ENSMUSG000000036242  | 1.02 | 5.32E-13 | Armh4         | protein_coding | 7.84  | 8.05  | 7.54  | 7.76  | 9.06  | 9.02  | 8.49  | 8.61  |
| Up | ENSMUSG000000005611  | 1.02 | 6.11E-03 | Mrv1          | protein_coding | 4.77  | 5.08  | 4.65  | 5.09  | 5.69  | 6.53  | 5.52  | 5.20  |
| Up | ENSMUSG000000022477  | 1.01 | 5.98E-58 | Aco2          | protein_coding | 10.55 | 10.42 | 10.51 | 10.31 | 11.46 | 11.48 | 11.57 | 11.32 |
| Up | ENSMUSG000000056296  | 1.01 | 2.77E-29 | Synpr         | protein_coding | 8.52  | 8.71  | 8.68  | 8.61  | 9.53  | 9.62  | 9.76  | 9.63  |
| Up | ENSMUSG000000109324  | 1.01 | 1.67E-22 | Prmt1         | protein_coding | 7.50  | 7.44  | 7.58  | 7.52  | 8.44  | 8.59  | 8.65  | 8.33  |
| Up | ENSMUSG000000020949  | 1.01 | 4.11E-59 | Fkbp3         | protein_coding | 9.31  | 9.46  | 9.45  | 9.47  | 10.33 | 10.52 | 10.48 | 10.39 |
| Up | ENSMUSG000000024474  | 1.01 | 1.07E-40 | Ik            | protein_coding | 9.25  | 9.29  | 9.23  | 9.16  | 10.33 | 10.22 | 10.26 | 10.14 |
| Up | ENSMUSG000000036748  | 1.01 | 1.38E-26 | Cuedc2        | protein_coding | 8.45  | 8.41  | 8.52  | 8.46  | 9.44  | 9.46  | 9.55  | 9.41  |
| Up | ENSMUSG000000005980  | 1.01 | 1.83E-08 | Dnase1        | protein_coding | 5.86  | 5.55  | 5.48  | 5.54  | 6.47  | 6.89  | 6.43  | 6.41  |
| Up | ENSMUSG000000033152  | 1.01 | 1.47E-47 | Podxl2        | protein_coding | 9.35  | 9.36  | 9.46  | 9.15  | 10.37 | 10.26 | 10.42 | 10.31 |
| Up | ENSMUSG000000023092  | 1.01 | 3.52E-22 | Fhl1          | protein_coding | 7.92  | 7.75  | 7.77  | 8.12  | 8.83  | 8.71  | 9.14  | 8.87  |
| Up | ENSMUSG000000029557  | 1.01 | 4.95E-04 | Mrm2          | protein_coding | 4.77  | 5.00  | 4.70  | 5.71  | 6.58  | 5.87  | 5.84  | 5.66  |
| Up | ENSMUSG000000032115  | 1.01 | 8.91E-20 | Hyou1         | protein_coding | 9.08  | 8.99  | 8.76  | 8.82  | 10.02 | 9.89  | 9.98  | 9.79  |
| Up | ENSMUSG000000071176  | 1.01 | 8.00E-15 | Arhgef10      | protein_coding | 8.32  | 8.30  | 8.27  | 8.04  | 9.65  | 8.91  | 9.16  | 9.12  |
| Up | ENSMUSG000000020048  | 1.01 | 2.47E-22 | Hsp90b1       | protein_coding | 11.05 | 10.84 | 10.55 | 10.69 | 12.03 | 11.80 | 11.66 | 11.70 |
| Up | ENSMUSG000000009731  | 1.01 | 1.04E-06 | Kcnd1         | protein_coding | 5.82  | 6.01  | 5.86  | 6.02  | 7.12  | 7.03  | 6.73  | 6.62  |
| Up | ENSMUSG000000024777  | 1.01 | 9.73E-32 | Ppp2r5b       | protein_coding | 9.28  | 9.22  | 9.38  | 9.20  | 10.24 | 10.24 | 10.41 | 10.21 |
| Up | ENSMUSG000000034216  | 1.01 | 3.46E-14 | Vps18         | protein_coding | 6.89  | 7.37  | 7.06  | 7.08  | 8.10  | 7.90  | 8.32  | 8.04  |
| Up | ENSMUSG000000040356  | 1.01 | 6.81E-20 | Skiv2l        | protein_coding | 7.25  | 7.49  | 7.52  | 7.32  | 8.25  | 8.39  | 8.47  | 8.30  |
| Up | ENSMUSG000000039661  | 1.01 | 9.14E-25 | Dusp26        | protein_coding | 8.31  | 8.54  | 8.19  | 8.31  | 9.51  | 9.20  | 9.20  | 9.44  |
| Up | ENSMUSG000000074909  | 1.01 | 4.93E-16 | Rantap9       | protein_coding | 8.04  | 8.07  | 7.56  | 7.99  | 9.03  | 8.92  | 8.82  | 8.82  |
| Up | ENSMUSG000000036636  | 1.01 | 3.14E-15 | Clec7         | protein_coding | 7.81  | 7.37  | 7.30  | 7.30  | 8.42  | 8.41  | 8.56  | 8.42  |
| Up | ENSMUSG000000033430  | 1.01 | 1.05E-16 | Terf2ip       | protein_coding | 8.36  | 8.29  | 8.42  | 8.33  | 9.09  | 9.25  | 9.60  | 9.40  |
| Up | ENSMUSG000000030612  | 1.01 | 1.64E-10 | Mrp46         | protein_coding | 7.29  | 6.96  | 7.12  | 7.26  | 8.02  | 8.16  | 8.42  | 7.96  |
| Up | ENSMUSG000000056553  | 1.01 | 1.13E-48 | Ptpm2         | protein_coding | 10.90 | 10.84 | 10.74 | 10.66 | 11.75 | 11.88 | 11.77 | 11.76 |
| Up | ENSMUSG000000075033  | 1.01 | 7.63E-20 | Nxpe3         | protein_coding | 7.55  | 7.56  | 7.60  | 7.49  | 8.55  | 8.67  | 8.68  | 8.22  |
| Up | ENSMUSG000000056394  | 1.01 | 3.03E-07 | Lig1          | protein_coding | 5.95  | 5.84  | 5.83  | 6.38  | 7.05  | 6.99  | 7.06  | 6.83  |
| Up | ENSMUSG000000035864  | 1.01 | 9.10E-49 | Syt1          | protein_coding | 12.98 | 12.99 | 12.85 | 12.80 | 13.88 | 13.97 | 14.00 | 13.80 |
| Up | ENSMUSG000000025189  | 1.01 | 3.94E-36 | Cnrm1         | protein_coding | 9.48  | 9.49  | 9.48  | 9.33  | 10.42 | 10.38 | 10.68 | 10.29 |
| Up | ENSMUSG000000030847  | 1.01 | 3.53E-05 | Bag3          | protein_coding | 6.41  | 5.75  | 5.77  | 5.67  | 7.10  | 6.91  | 6.74  | 6.78  |
| Up | ENSMUSG000000030609  | 1.00 | 5.45E-06 | Aen           | protein_coding | 6.97  | 6.79  | 7.00  | 6.76  | 7.96  | 7.35  | 8.19  | 7.82  |
| Up | ENSMUSG000000026864  | 1.00 | 8.53E-14 | Hspa5         | protein_coding | 10.07 | 9.75  | 9.29  | 9.69  | 10.94 | 10.87 | 10.47 | 10.57 |
| Up | ENSMUSG000000021288  | 1.00 | 1.12E-55 | Klc1          | protein_coding | 11.78 | 11.72 | 11.72 | 11.65 | 12.73 | 12.71 | 12.86 | 12.58 |
| Up | ENSMUSG000000025384  | 1.00 | 3.24E-08 | Faap100       | protein_coding | 6.09  | 5.95  | 5.69  | 5.77  | 7.09  | 6.84  | 6.69  | 6.69  |
| Up | ENSMUSG000000030704  | 1.00 | 7.77E-45 | Raba6         | protein_coding | 11.50 | 11.59 | 11.60 | 11.54 | 12.58 | 12.56 | 12.70 | 12.38 |
| Up | ENSMUSG000000009035  | 1.00 | 2.07E-23 | Tmem184b      | protein_coding | 8.55  | 8.62  | 8.38  | 8.40  | 9.37  | 9.45  | 9.75  | 9.32  |
| Up | ENSMUSG000000031428  | 1.00 | 1.70E-41 | Zcchc18       | protein_coding | 9.69  | 9.63  | 9.70  | 9.63  | 10.50 | 10.69 | 10.78 | 10.66 |
| Up | ENSMUSG000000033579  | 1.00 | 5.25E-08 | Fa2h          | protein_coding | 7.56  | 7.42  | 7.55  | 7.44  | 8.93  | 7.95  | 8.13  | 8.69  |
| Up | ENSMUSG000000024413  | 1.00 | 5.43E-32 | Npc1          | protein_coding | 7.99  | 7.89  | 8.02  | 7.71  | 8.98  | 8.83  | 8.93  | 8.83  |
| Up | ENSMUSG000000026458  | 1.00 | 2.00E-24 | Ppfla4        | protein_coding | 9.58  | 9.61  | 9.59  | 9.51  | 10.50 | 10.57 | 10.71 | 10.50 |

All Differentially expressed genes\_DeSeq2, FDR cutoff, 0.01 Fold difference, 2

| Regulation | Ensembl ID          | log2 Fold Change | Adj.Pval  | Symbol        | Type      | RiboMutINPUT1 | RiboMutINPUT2 | RiboMutINPUT3 | RiboMutINPUT4 | RiboMutIP1 | RiboMutIP2 | RiboMutIP3 | RiboMutIP4 |
|------------|---------------------|------------------|-----------|---------------|-----------|---------------|---------------|---------------|---------------|------------|------------|------------|------------|
| Up         | ENSMUSG000000087563 | 4.05             | 9.29E-234 | Gm14205       | antisense | 6.88          | 6.41          | 6.63          | 6.44          | 10.69      | 10.47      | 10.74      | 10.44      |
| Up         | ENSMUSG000000097274 | 1.79             | 1.84E-193 | Gm47512       | antisense | 10.04         | 9.91          | 10.04         | 9.92          | 11.73      | 11.82      | 11.80      | 11.71      |
| Down       | ENSMUSG000000087185 | -2.95            | 1.50E-175 | Gm13872       | antisense | 10.46         | 10.51         | 10.46         | 10.29         | 7.46       | 7.69       | 7.10       | 7.72       |
| Up         | ENSMUSG000000086741 | 3.46             | 6.51E-139 | Gm29316       | antisense | 6.51          | 6.33          | 6.29          | 6.29          | 9.98       | 9.97       | 9.92       | 9.92       |
| Up         | ENSMUSG000000107999 | 1.81             | 1.10E-109 | Gm44123       | antisense | 8.66          | 8.68          | 8.57          | 8.42          | 10.36      | 10.39      | 10.54      | 10.20      |
| Up         | ENSMUSG000000086900 | 3.38             | 1.25E-86  | Konab3os      | antisense | 5.15          | 5.14          | 5.38          | 5.07          | 8.66       | 8.39       | 8.41       | 8.20       |
| Up         | ENSMUSG000000097006 | 1.45             | 1.00E-83  | 9530082P21Rik | antisense | 8.31          | 8.15          | 8.25          | 8.23          | 9.72       | 9.74       | 9.70       | 9.70       |
| Down       | ENSMUSG000000097414 | -1.87            | 7.66E-81  | B130046B21Rik | antisense | 10.85         | 10.66         | 10.75         | 10.46         | 8.89       | 8.80       | 8.84       | 8.77       |
| Up         | ENSMUSG000000112652 | 1.70             | 2.31E-79  | 4921516A02Rik | antisense | 8.39          | 8.40          | 8.40          | 8.12          | 10.04      | 10.07      | 10.10      | 9.80       |
| Up         | ENSMUSG000000090907 | 2.88             | 6.01E-74  | C030017D09Rik | antisense | 5.04          | 5.31          | 4.73          | 4.91          | 7.65       | 7.64       | 7.64       | 7.78       |
| Down       | ENSMUSG000000045238 | -3.79            | 3.09E-71  | A730035I17Rik | antisense | 7.37          | 7.25          | 7.47          | 7.31          | 3.56       | 3.84       | 4.07       | 3.57       |
| Up         | ENSMUSG000000086796 | 1.90             | 3.73E-65  | 4932702P03Rik | antisense | 7.33          | 7.16          | 7.21          | 7.01          | 9.00       | 9.18       | 9.17       | 8.83       |
| Down       | ENSMUSG000000087341 | -2.61            | 7.71E-60  | 0610040F04Rik | antisense | 6.79          | 6.78          | 6.57          | 6.76          | 4.59       | 3.84       | 4.45       | 4.53       |
| Down       | ENSMUSG000000097535 | -2.39            | 7.55E-59  | Gm26592       | antisense | 8.70          | 8.68          | 8.83          | 8.55          | 6.03       | 6.34       | 6.06       | 6.86       |
| Down       | ENSMUSG000000086544 | -1.20            | 7.61E-59  | Chn1os3       | antisense | 10.55         | 10.52         | 10.44         | 10.52         | 9.15       | 9.33       | 9.10       | 9.36       |
| Down       | ENSMUSG000000091390 | -1.82            | 6.02E-59  | Gm17168       | antisense | 8.63          | 8.62          | 8.69          | 8.57          | 6.47       | 6.97       | 7.03       | 6.85       |
| Down       | ENSMUSG000000104927 | -1.02            | 9.59E-55  | B230334C09Rik | antisense | 9.75          | 9.79          | 9.81          | 9.79          | 8.57       | 8.91       | 8.90       | 8.79       |
| Up         | ENSMUSG000000084946 | 2.15             | 4.51E-50  | Dk1tas        | antisense | 6.32          | 6.29          |               |               |            |            |            |            |

|      |                    |       |          |               |            |      |      |      |      |      |      |      |      |
|------|--------------------|-------|----------|---------------|------------|------|------|------|------|------|------|------|------|
| Up   | ENSMUSG00000087301 | 2.56  | 4.37E-44 | Gm13629       | antiseense | 5.55 | 5.53 | 5.52 | 5.52 | 8.10 | 7.99 | 8.15 | 7.66 |
| Down | ENSMUSG00000084849 | -1.48 | 1.10E-41 | Gm16105       | antiseense | 8.24 | 8.61 | 8.59 | 8.49 | 7.24 | 7.04 | 6.78 | 7.04 |
| Up   | ENSMUSG00000108832 | 1.46  | 3.77E-41 | Gm44832       | antiseense | 7.67 | 7.65 | 7.91 | 7.59 | 9.02 | 9.45 | 9.15 | 8.93 |
| Down | ENSMUSG00000103217 | -3.39 | 2.45E-39 | Gm38287       | antiseense | 6.26 | 6.68 | 6.64 | 6.75 | 3.60 | 4.32 | 2.86 | 3.57 |
| Up   | ENSMUSG00000087515 | 1.90  | 3.93E-39 | Gm13554       | antiseense | 6.51 | 6.29 | 6.23 | 6.08 | 8.15 | 8.19 | 8.11 | 8.02 |
| Up   | ENSMUSG00000097546 | 1.34  | 4.83E-38 | Gm26749       | antiseense | 6.30 | 6.42 | 6.08 | 6.47 | 7.58 | 7.51 | 7.59 | 7.79 |
| Up   | ENSMUSG00000115923 | -1.34 | 1.46E-37 | Gm49521       | antiseense | 6.98 | 7.29 | 7.38 | 7.08 | 6.34 | 6.35 | 6.47 | 6.24 |
| Down | ENSMUSG00000110588 | -3.91 | 4.78E-37 | Gm45774       | antiseense | 8.73 | 9.03 | 8.89 | 8.84 | 4.06 | 5.43 | 5.00 | 5.59 |
| Up   | ENSMUSG00000091816 | 3.29  | 7.33E-37 | Gm17141       | antiseense | 4.65 | 4.61 | 4.09 | 4.12 | 7.46 | 7.63 | 6.93 | 7.49 |
| Up   | ENSMUSG00000110455 | 2.33  | 2.73E-36 | Gm45904       | antiseense | 5.15 | 5.44 | 4.93 | 4.96 | 7.28 | 7.36 | 7.51 | 7.13 |
| Down | ENSMUSG00000086155 | -1.57 | 1.61E-34 | 9430041J12Rik | antiseense | 7.78 | 7.47 | 7.55 | 7.57 | 6.23 | 6.20 | 5.95 | 5.95 |
| Down | ENSMUSG00000079045 | -2.31 | 6.17E-34 | Prox1os       | antiseense | 6.21 | 6.48 | 6.52 | 6.38 | 4.54 | 4.01 | 4.19 | 4.55 |
| Down | ENSMUSG00000085837 | -1.78 | 3.17E-33 | Kcnmb4os2     | antiseense | 8.38 | 8.43 | 8.54 | 8.30 | 7.01 | 6.25 | 6.95 | 6.30 |
| Down | ENSMUSG00000110279 | -1.15 | 1.26E-32 | Gm45552       | antiseense | 8.76 | 8.57 | 8.58 | 8.69 | 7.28 | 7.75 | 7.47 | 7.53 |
| Up   | ENSMUSG00000092381 | 1.54  | 1.96E-32 | Gm20512       | antiseense | 6.86 | 6.65 | 6.77 | 6.56 | 8.40 | 7.90 | 8.38 | 8.13 |
| Up   | ENSMUSG00000086418 | 1.52  | 2.11E-32 | Gm13362       | antiseense | 5.74 | 6.04 | 5.86 | 5.81 | 7.14 | 7.31 | 7.48 | 7.30 |
| Down | ENSMUSG00000055048 | -1.88 | 4.45E-32 | Gm9962        | antiseense | 8.09 | 8.06 | 8.25 | 8.00 | 6.37 | 6.22 | 6.48 | 5.98 |
| Up   | ENSMUSG00000110138 | 1.13  | 1.80E-31 | 4831440D22Rik | antiseense | 7.20 | 7.05 | 7.11 | 7.11 | 8.01 | 8.23 | 8.30 | 8.30 |
| Up   | ENSMUSG00000110630 | 1.18  | 3.40E-31 | K230015D01Rik | antiseense | 7.46 | 7.30 | 7.40 | 7.14 | 8.44 | 8.60 | 8.45 | 8.46 |
| Down | ENSMUSG00000087541 | -2.23 | 1.58E-30 | Hopxos        | antiseense | 7.61 | 7.30 | 7.14 | 7.54 | 4.88 | 5.27 | 5.66 | 5.27 |
| Down | ENSMUSG00000085001 | -1.01 | 5.11E-30 | Rapgef4os2    | antiseense | 9.48 | 9.30 | 9.34 | 9.25 | 8.23 | 8.50 | 8.23 | 8.23 |
| Up   | ENSMUSG00000085779 | 1.31  | 1.15E-29 | Alcayos       | antiseense | 7.40 | 7.54 | 7.44 | 7.21 | 8.85 | 8.75 | 8.77 | 8.34 |
| Down | ENSMUSG00000087095 | -3.14 | 6.22E-29 | Emx2os        | antiseense | 6.50 | 6.21 | 6.70 | 6.48 | 2.97 | 4.54 | 3.30 | 3.78 |
| Up   | ENSMUSG00000109341 | 1.35  | 2.20E-28 | Gm30873       | antiseense | 6.61 | 6.56 | 6.85 | 6.49 | 7.84 | 8.05 | 8.00 | 7.87 |
| Up   | ENSMUSG00000097419 | 2.20  | 3.40E-28 | Gm26666       | antiseense | 5.89 | 5.91 | 5.50 | 5.94 | 8.37 | 8.10 | 7.57 | 7.54 |
| Down | ENSMUSG00000086259 | -2.67 | 2.32E-27 | Tmem150cos    | antiseense | 5.78 | 6.37 | 5.95 | 6.02 | 3.81 | 4.04 | 3.24 | 3.92 |
| Up   | ENSMUSG00000086740 | 1.10  | 1.35E-25 | Gm17029       | antiseense | 7.39 | 7.15 | 7.37 | 7.30 | 8.37 | 8.32 | 8.48 | 8.35 |
| Down | ENSMUSG00000087526 | -1.53 | 1.55E-25 | Gm15738       | antiseense | 6.85 | 6.61 | 6.94 | 6.50 | 5.46 | 5.34 | 4.81 | 5.51 |
| Down | ENSMUSG00000090208 | -3.74 | 9.94E-24 | Gm15851       | antiseense | 6.73 | 6.29 | 5.90 | 6.73 | 2.90 | 3.43 | 2.54 | 4.08 |
| Down | ENSMUSG00000097466 | -1.95 | 1.89E-23 | D430036J16Rik | antiseense | 6.12 | 6.29 | 5.75 | 5.96 | 4.03 | 4.13 | 4.50 | 4.55 |
| Up   | ENSMUSG00000090063 | 1.70  | 5.40E-23 | Dlx6os1       | antiseense | 7.71 | 7.57 | 7.67 | 7.71 | 9.16 | 9.29 | 9.61 | 9.29 |
| Up   | ENSMUSG00000108043 | 1.41  | 5.99E-23 | Zim3          | antiseense | 6.95 | 7.31 | 7.35 | 7.19 | 9.10 | 8.80 | 8.65 | 8.75 |
| Up   | ENSMUSG00000092375 | 1.96  | 2.25E-22 | A730060N03Rik | antiseense | 5.12 | 5.75 | 5.77 | 5.20 | 8.10 | 8.10 | 6.96 | 7.10 |
| Down | ENSMUSG00000104569 | -1.33 | 3.48E-22 | Gm43116       | antiseense | 7.61 | 7.13 | 7.59 | 6.26 | 6.07 | 6.07 | 6.04 | 6.30 |
| Down | ENSMUSG00000087115 | -1.07 | 4.98E-22 | Pesk2os2      | antiseense | 7.25 | 7.27 | 7.18 | 7.11 | 6.00 | 6.33 | 6.02 | 6.30 |
| Down | ENSMUSG00000104283 | -1.11 | 5.03E-22 | Gm37459       | antiseense | 9.15 | 9.16 | 9.27 | 9.02 | 7.94 | 9.02 | 7.71 | 7.94 |
| Up   | ENSMUSG00000110020 | 1.47  | 1.12E-21 | Gm45441       | antiseense | 6.24 | 6.20 | 5.91 | 6.13 | 7.62 | 7.61 | 7.49 | 7.44 |
| Down | ENSMUSG00000020164 | -1.74 | 3.26E-21 | Kcnmb4os1     | antiseense | 7.31 | 7.48 | 7.60 | 7.31 | 6.12 | 5.50 | 6.09 | 5.13 |
| Up   | ENSMUSG00000086527 | 2.38  | 8.61E-21 | Gm15856       | antiseense | 4.82 | 4.95 | 4.85 | 4.87 | 6.98 | 7.14 | 7.21 | 7.00 |
| Down | ENSMUSG00000097750 | -2.20 | 9.13E-21 | Gm4673        | antiseense | 5.76 | 6.02 | 5.91 | 5.99 | 4.25 | 3.69 | 3.35 | 4.55 |
| Up   | ENSMUSG00000086717 | 2.93  | 1.44E-20 | Gm15655       | antiseense | 3.38 | 4.01 | 4.49 | 4.55 | 7.08 | 6.72 | 6.83 | 6.55 |
| Down | ENSMUSG00000084911 | -2.34 | 2.44E-20 | Gm16185       | antiseense | 5.58 | 6.18 | 5.37 | 6.23 | 4.01 | 3.59 | 3.70 | 3.70 |
| Down | ENSMUSG00000097915 | -2.44 | 2.62E-20 | A33009N23Rik  | antiseense | 5.08 | 5.35 | 5.78 | 5.58 | 3.85 | 3.52 | 3.19 | 3.44 |
| Down | ENSMUSG00000097267 | -3.27 | 9.71E-19 | 1700109K24Rik | antiseense | 4.48 | 4.58 | 4.54 | 5.09 | 2.44 | 2.09 | 2.93 | 2.99 |
| Down | ENSMUSG00000097745 | -1.97 | 1.30E-18 | Al115009      | antiseense | 7.03 | 6.85 | 7.31 | 6.98 | 5.70 | 5.70 | 5.00 | 5.14 |
| Down | ENSMUSG00000103502 | -2.01 | 1.76E-18 | 9330121J05Rik | antiseense | 6.54 | 6.61 | 6.68 | 6.80 | 4.10 | 5.20 | 4.85 | 4.77 |
| Up   | ENSMUSG00000098430 | 1.90  | 2.12E-18 | 493051019Rik  | antiseense | 4.90 | 4.42 | 4.64 | 4.40 | 6.43 | 6.01 | 6.38 | 6.07 |
| Up   | ENSMUSG00000098129 | 4.25  | 2.27E-18 | Gm27040       | antiseense | 5.21 | 4.74 | 4.74 | 5.17 | 2.25 | 2.00 | 2.45 | 3.17 |
| Up   | ENSMUSG00000100130 | -1.15 | 3.00E-18 | Gm28379       | antiseense | 7.24 | 7.14 | 6.98 | 6.95 | 8.17 | 8.36 | 7.93 | 8.34 |
| Down | ENSMUSG00000087535 | -2.03 | 3.04E-18 | Zmiz1os1      | antiseense | 5.86 | 5.71 | 5.29 | 5.60 | 3.23 | 4.13 | 3.94 | 4.17 |
| Up   | ENSMUSG00000100556 | 1.65  | 7.81E-18 | Gm28902       | antiseense | 6.02 | 6.44 | 6.02 | 6.49 | 7.96 | 7.60 | 8.13 | 7.70 |
| Up   | ENSMUSG00000101503 | 1.32  | 8.17E-18 | Gm28364       | antiseense | 6.48 | 6.61 | 6.53 | 6.59 | 7.84 | 8.11 | 7.52 | 7.82 |
| Up   | ENSMUSG00000097431 | 1.32  | 9.39E-18 | Gm26782       | antiseense | 6.54 | 6.99 | 7.15 | 7.21 | 8.34 | 8.03 | 8.57 | 8.16 |
| Down | ENSMUSG00000101609 | -1.85 | 1.10E-16 | Kcnq1ot1      | antiseense | 8.18 | 8.39 | 8.57 | 8.44 | 5.59 | 6.68 | 6.79 | 6.95 |
| Down | ENSMUSG00000090307 | -1.62 | 1.34E-16 | 1700071M16Rik | antiseense | 7.08 | 6.95 | 6.85 | 6.92 | 5.22 | 5.67 | 5.41 | 5.37 |
| Down | ENSMUSG00000097029 | -2.98 | 5.02E-16 | Gm26560       | antiseense | 5.38 | 5.60 | 5.28 | 4.89 | 2.66 | 3.22 | 3.00 | 3.34 |
| Up   | ENSMUSG00000114922 | 1.33  | 7.13E-16 | Ppf1os        | antiseense | 5.82 | 5.60 | 5.94 | 5.98 | 7.01 | 6.91 | 7.27 | 6.98 |
| Down | ENSMUSG00000109194 | -1.12 | 8.50E-16 | Gm44570       | antiseense | 8.24 | 8.22 | 7.91 | 7.91 | 7.07 | 6.63 | 7.28 | 6.85 |
| Up   | ENSMUSG00000105255 | 1.10  | 1.21E-15 | Gm42413       | antiseense | 8.24 | 8.22 | 8.29 | 8.31 | 9.52 | 8.81 | 9.26 | 9.48 |
| Up   | ENSMUSG00000092354 | 1.06  | 1.41E-15 | Gm20548       | antiseense | 7.05 | 7.04 | 6.70 | 6.79 | 7.95 | 7.81 | 7.95 | 8.02 |
| Up   | ENSMUSG00000073152 | 1.71  | 1.78E-15 | Gm10475       | antiseense | 5.04 | 4.79 | 4.43 | 4.82 | 6.20 | 6.18 | 6.78 | 6.12 |
| Down | ENSMUSG00000097756 | -3.90 | 1.87E-15 | A730056A08Rik | antiseense | 4.36 | 5.08 | 4.54 | 5.27 | 2.12 | 2.12 | 2.45 | 2.92 |
| Down | ENSMUSG00000110790 | -1.58 | 3.65E-15 | Gm47079       | antiseense | 6.45 | 6.23 | 6.59 | 6.47 | 4.92 | 4.56 | 5.34 | 5.03 |
| Down | ENSMUSG00000097649 | -2.69 | 4.48E-15 | Gm10561       | antiseense | 6.06 | 6.08 | 5.98 | 6.51 | 2.62 | 6.31 | 3.75 | 4.25 |
| Up   | ENSMUSG00000097471 | 1.38  | 5.94E-15 | 5830432E09Rik | antiseense | 5.58 | 6.09 | 5.89 | 5.52 | 7.34 | 7.21 | 7.02 | 6.76 |
| Down | ENSMUSG00000086389 | -1.19 | 9.89E-15 | Gm15998       | antiseense | 7.31 | 7.11 | 7.23 | 7.01 | 6.20 | 6.09 | 5.88 | 5.94 |
| Down | ENSMUSG00000097622 | -1.61 | 1.09E-13 | A330033J07Rik | antiseense | 6.99 | 6.92 | 7.14 | 7.15 | 5.76 | 5.57 | 4.61 | 5.88 |
| Up   | ENSMUSG00000099510 | 2.07  | 1.33E-13 | Gm28501       | antiseense | 4.62 | 5.19 | 5.46 | 5.09 | 7.07 | 6.64 | 7.26 | 7.18 |
| Down | ENSMUSG00000097325 | -1.89 | 1.57E-13 | Gm16897       | antiseense | 5.50 | 5.68 | 5.49 | 5.54 | 4.52 | 4.32 | 3.13 | 3.44 |
| Down | ENSMUSG00000085207 | -3.83 | 2.49E-13 | Gm11767       | antiseense | 4.15 | 4.82 | 4.44 | 4.50 | 2.70 | 2.00 | 2.62 | 2.60 |
| Down | ENSMUSG00000097209 | -2.15 | 5.74E-13 | AU022754      | antiseense | 4.59 | 4.89 | 4.85 | 5.09 | 3.60 | 3.17 | 3.24 | 3.06 |
| Down | ENSMUSG00000087640 | -1.40 | 7.72E-13 | Gm14798       | antiseense | 6.19 | 6.84 | 6.20 | 6.52 | 5.29 | 4.97 | 4.92 | 5.41 |
| Down | ENSMUSG00000092405 | -1.58 | 9.65E-13 | Gm20542       | antiseense | 6.36 | 5.93 | 5.96 | 6.36 | 4.78 | 4.19 | 4.38 | 4.87 |
| Down | ENSMUSG00000116903 | -3.74 | 1.07E-12 | Gm19522       | antiseense | 4.62 | 4.91 | 4.60 | 4.63 | 2.13 | 2.63 | 2.35 | 2.78 |
| Down | ENSMUSG00000086893 | -1.30 | 1.49E-12 | A730081D07Rik | antiseense | 5.96 | 6.02 | 6.20 | 5.84 | 5.02 | 4.70 | 4.63 | 4.93 |
| Up   | ENSMUSG00000090327 | 1.16  | 1.79E-12 | Gm17111       | antiseense | 5.75 | 5.60 | 5.46 | 5.66 | 6.50 | 6.67 | 6.66 | 6.99 |
| Down | ENSMUSG00000107560 | -3.46 | 1.82E-12 | Gm44199       | antiseense | 3.77 | 4.05 | 4.52 | 4.53 | 2.24 | 2.24 | 2.24 | 2.99 |
| Down | ENSMUSG00000110580 | -4.10 | 3.59E-12 | D830024N08Rik | antiseense | 4.22 | 3.88 | 3.84 | 4.19 | 2.00 | 2.34 | 2.00 | 2.54 |
| Down | ENSMUSG00000097282 | -3.71 | 5.46E-12 | 5031415H12Rik | antiseense | 3.38 | 3.78 | 3.65 | 4.25 | 2.00 | 2.34 | 2.00 | 2.78 |
| Down | ENSMUSG00000103309 | -1.07 | 7.36E-12 | BC037039      | antiseense | 7.93 | 7.88 | 7.98 | 7.86 | 7.04 | 6.86 | 6.38 | 7.10 |
| Up   | ENSMUSG00000105910 | 1.35  | 1.16E-11 | Gm43539       | antiseense | 4.45 | 5.17 | 4.80 | 4.19 | 5.89 | 6.04 | 5.88 | 5.77 |
| Down | ENSMUSG00000087487 | -4.78 | 1.33E-11 | Ppp2r2cos     | antiseense | 3.61 | 3.97 | 4.52 | 3.94 | 2.00 | 2.00 | 2.00 | 2.54 |
| Up   | ENSMUSG00000100945 | 1.55  | 1.70E-11 | Gm29529       | antiseense | 5.51 | 5.56 | 6.00 | 5.34 | 7.31 | 7.19 | 7.15 | 6.64 |
| Down | ENSMUSG00000113029 | -2.82 | 2.24E-11 | Gm40578       | antiseense | 5.15 | 5.43 | 5.69 | 5.22 | 2.00 | 2.85 | 3.87 | 3.53 |
| Down | ENSMUSG00000098739 | -2.25 | 2.31E-11 | Gm27151       | antiseense | 4.89 | 4.82 | 4.93 | 4.72 | 2.37 | 3.65 | 3.35 | 3.12 |
| Down | ENSMUSG00000086171 | -1.29 | 3.08E-1  |               |            |      |      |      |      |      |      |      |      |

|      |                    |       |          |               |            |      |      |      |      |      |      |      |      |
|------|--------------------|-------|----------|---------------|------------|------|------|------|------|------|------|------|------|
| Down | ENSMUSG00000085516 | -1.15 | 7.41E-11 | 4930538E20Rik | antiseense | 6.98 | 7.02 | 7.03 | 7.05 | 6.31 | 5.67 | 5.91 | 5.71 |
| Down | ENSMUSG00000107722 | -3.26 | 7.89E-11 | 2900060B14Rik | antiseense | 4.29 | 4.58 | 4.37 | 4.67 | 2.97 | 2.70 | 2.24 | 2.24 |
| Down | ENSMUSG00000110945 | -1.57 | 8.69E-11 | Gm9856        | antiseense | 5.71 | 5.38 | 5.53 | 5.38 | 2.97 | 3.87 | 4.40 | 4.23 |
| Down | ENSMUSG00000114218 | -3.90 | 1.93E-10 | Gm47423       | antiseense | 3.95 | 3.39 | 4.05 | 3.55 | 2.00 | 2.00 | 2.00 | 2.00 |
| Down | ENSMUSG00000108655 | -2.61 | 2.11E-10 | Gm44949       | antiseense | 4.51 | 4.27 | 4.54 | 4.12 | 2.25 | 2.70 | 2.54 | 2.79 |
| Down | ENSMUSG00000087314 | -1.26 | 5.13E-10 | Prkag2os2     | antiseense | 5.73 | 6.23 | 5.86 | 5.99 | 4.86 | 5.16 | 4.45 | 4.75 |
| Down | ENSMUSG00000097987 | -3.97 | 6.43E-10 | Gm26542       | antiseense | 4.90 | 4.80 | 4.89 | 4.45 | 4.25 | 3.24 | 3.40 | 3.44 |
| Up   | ENSMUSG00000110373 | 2.28  | 6.96E-10 | Gm42303       | antiseense | 3.56 | 3.39 | 3.30 | 3.21 | 5.10 | 5.14 | 5.10 | 5.27 |
| Down | ENSMUSG00000086219 | -1.88 | 1.32E-09 | Srm4os        | antiseense | 4.77 | 5.15 | 5.77 | 5.24 | 2.90 | 4.01 | 3.13 | 4.41 |
| Down | ENSMUSG00000087625 | -1.25 | 2.18E-09 | 4930419G24Rik | antiseense | 6.95 | 6.80 | 6.98 | 6.40 | 5.69 | 6.03 | 4.69 | 5.75 |
| Down | ENSMUSG00000100192 | -1.15 | 2.89E-09 | Gm29587       | antiseense | 6.70 | 6.91 | 6.47 | 6.61 | 5.66 | 5.80 | 5.14 | 5.69 |
| Down | ENSMUSG00000115918 | -2.10 | 4.70E-09 | A930001M01Rik | antiseense | 3.67 | 3.83 | 4.49 | 4.19 | 2.47 | 2.98 | 2.86 | 2.85 |
| Down | ENSMUSG00000097462 | -2.28 | 5.60E-09 | 953002P05Rik  | antiseense | 5.15 | 5.36 | 5.09 | 5.05 | 3.60 | 3.38 | 2.63 | 3.78 |
| Down | ENSMUSG00000090160 | -3.27 | 5.72E-09 | 4930480K15Rik | antiseense | 3.56 | 4.34 | 3.75 | 3.69 | 2.13 | 2.12 | 2.00 | 2.92 |
| Down | ENSMUSG00000075027 | -3.34 | 6.18E-09 | 4631405J19Rik | antiseense | 3.86 | 4.27 | 3.80 | 3.21 | 2.37 | 2.00 | 2.00 | 2.78 |
| Down | ENSMUSG00000101680 | -2.22 | 6.19E-09 | Gm29015       | antiseense | 5.73 | 6.17 | 5.52 | 6.46 | 4.10 | 3.00 | 3.00 | 4.97 |
| Down | ENSMUSG00000086612 | -3.66 | 6.20E-09 | Gm12064       | antiseense | 3.91 | 3.46 | 3.36 | 3.60 | 2.00 | 2.24 | 2.00 | 2.54 |
| Down | ENSMUSG00000098284 | -1.11 | 6.43E-09 | A330093E20Rik | antiseense | 7.11 | 7.26 | 7.16 | 7.09 | 6.04 | 6.48 | 6.04 | 5.70 |
| Down | ENSMUSG00000086584 | -3.12 | 7.57E-09 | Gm12002       | antiseense | 4.32 | 3.57 | 3.16 | 4.05 | 2.57 | 2.00 | 2.00 | 2.78 |
| Down | ENSMUSG00000074398 | -1.87 | 8.85E-09 | Gm15441       | antiseense | 5.12 | 5.81 | 5.32 | 5.58 | 2.97 | 4.42 | 3.83 | 4.08 |
| Down | ENSMUSG00000097652 | -2.50 | 9.03E-09 | Mhnt          | antiseense | 7.15 | 7.25 | 6.44 | 7.81 | 3.82 | 4.85 | 4.19 | 5.86 |
| Down | ENSMUSG00000108175 | -1.36 | 1.22E-08 | Gm16499       | antiseense | 6.20 | 5.82 | 6.14 | 5.97 | 5.17 | 4.56 | 4.19 | 5.13 |
| Down | ENSMUSG00000087366 | -1.60 | 1.48E-08 | Junos         | antiseense | 6.29 | 6.09 | 6.31 | 6.45 | 5.32 | 4.51 | 3.83 | 5.21 |
| Down | ENSMUSG00000075514 | -1.62 | 1.58E-08 | Gm13375       | antiseense | 6.29 | 6.01 | 6.15 | 6.14 | 3.85 | 4.32 | 4.87 | 5.31 |
| Down | ENSMUSG00000108563 | -3.90 | 1.65E-08 | Gm44686       | antiseense | 3.56 | 4.01 | 2.64 | 3.86 | 2.00 | 2.34 | 2.24 | 2.12 |
| Up   | ENSMUSG00000114536 | 1.59  | 1.96E-08 | Gm48837       | antiseense | 4.48 | 4.13 | 4.17 | 4.48 | 5.71 | 6.02 | 5.62 | 5.42 |
| Down | ENSMUSG00000107379 | -1.70 | 2.26E-08 | Gm43126       | antiseense | 5.38 | 5.87 | 5.50 | 5.84 | 3.35 | 4.49 | 4.54 | 4.11 |
| Down | ENSMUSG00000087263 | -2.41 | 2.60E-08 | Gm15726       | antiseense | 4.22 | 4.37 | 4.65 | 4.12 | 2.37 | 3.28 | 2.35 | 3.06 |
| Down | ENSMUSG00000084821 | -3.36 | 3.73E-08 | Gm15880       | antiseense | 3.44 | 3.57 | 3.60 | 3.69 | 2.00 | 2.00 | 2.00 | 2.85 |
| Down | ENSMUSG00000089940 | -1.88 | 3.75E-08 | Gm4117        | antiseense | 5.92 | 6.33 | 6.45 | 6.59 | 4.25 | 4.83 | 4.27 | 5.05 |
| Up   | ENSMUSG00000106137 | 1.68  | 4.46E-08 | Gm42538       | antiseense | 3.61 | 3.52 | 4.09 | 5.36 | 5.04 | 5.68 | 5.03 | 5.05 |
| Down | ENSMUSG00000110764 | -3.91 | 4.55E-08 | 4930405J17Rik | antiseense | 3.67 | 3.39 | 3.84 | 3.50 | 2.00 | 2.44 | 2.24 | 2.00 |
| Down | ENSMUSG00000107306 | -6.08 | 4.75E-08 | Gm360         | antiseense | 3.60 | 3.68 | 3.60 | 3.60 | 2.00 | 2.00 | 2.00 | 2.00 |
| Down | ENSMUSG00000108617 | -2.16 | 5.02E-08 | Gm31749       | antiseense | 3.78 | 3.78 | 4.01 | 3.33 | 2.00 | 2.74 | 2.00 | 2.54 |
| Down | ENSMUSG00000098760 | -2.31 | 6.03E-08 | Gm2164        | antiseense | 4.36 | 4.34 | 4.30 | 4.25 | 3.04 | 3.22 | 2.71 | 2.24 |
| Down | ENSMUSG00000115002 | -6.26 | 6.52E-08 | Gm10847       | antiseense | 2.75 | 3.19 | 3.16 | 3.55 | 2.00 | 2.00 | 2.00 | 2.00 |
| Down | ENSMUSG00000101640 | -1.58 | 7.02E-08 | Gm28376       | antiseense | 5.55 | 5.89 | 6.05 | 5.88 | 4.36 | 4.19 | 4.65 | 4.59 |
| Down | ENSMUSG00000086763 | -3.32 | 7.16E-08 | Plxn4os1      | antiseense | 3.10 | 4.20 | 4.34 | 3.65 | 2.00 | 2.24 | 2.35 | 2.70 |
| Up   | ENSMUSG00000086483 | 2.72  | 7.89E-08 | 8030443G20Rik | antiseense | 3.44 | 3.88 | 3.65 | 3.90 | 5.63 | 6.30 | 5.99 | 6.08 |
| Up   | ENSMUSG00000086648 | 1.50  | 9.51E-08 | Gm15511       | antiseense | 4.39 | 4.56 | 4.01 | 4.58 | 5.30 | 5.70 | 6.17 | 5.51 |
| Down | ENSMUSG00000105709 | -1.07 | 1.01E-07 | Gm42723       | antiseense | 7.18 | 7.29 | 7.39 | 7.08 | 5.36 | 6.28 | 6.27 | 6.63 |
| Down | ENSMUSG00000085213 | -2.63 | 1.04E-07 | Gm13091       | antiseense | 4.62 | 4.77 | 3.93 | 4.22 | 3.38 | 3.28 | 2.92 | 3.27 |
| Down | ENSMUSG00000086843 | -1.78 | 1.05E-07 | E030013119Rik | antiseense | 5.44 | 5.15 | 5.65 | 5.49 | 3.50 | 3.43 | 4.79 | 3.62 |
| Down | ENSMUSG00000089842 | -4.88 | 1.13E-07 | Ptprn2os2     | antiseense | 3.25 | 4.01 | 3.54 | 3.50 | 2.13 | 2.00 | 2.00 | 2.24 |
| Up   | ENSMUSG00000086119 | -1.01 | 1.14E-07 | Gm2415        | antiseense | 6.49 | 6.22 | 6.45 | 6.16 | 5.74 | 5.28 | 5.05 | 5.47 |
| Down | ENSMUSG00000085873 | 2.23  | 1.24E-07 | Ttc39aos1     | antiseense | 3.61 | 3.46 | 3.60 | 3.60 | 5.49 | 5.24 | 4.99 | 4.68 |
| Up   | ENSMUSG00000091154 | 5.77  | 1.25E-07 | Procos        | antiseense | 4.89 | 4.77 | 4.89 | 4.73 | 6.06 | 6.31 | 6.06 | 5.85 |
| Down | ENSMUSG00000099767 | -3.07 | 1.33E-07 | Gm28884       | antiseense | 3.81 | 3.63 | 3.80 | 3.94 | 2.00 | 2.12 | 2.13 | 2.99 |
| Down | ENSMUSG00000101037 | -2.78 | 1.36E-07 | Gm28424       | antiseense | 4.36 | 4.56 | 4.27 | 4.37 | 2.37 | 2.00 | 3.00 | 3.12 |
| Down | ENSMUSG00000087413 | -1.79 | 1.54E-07 | Gm11266       | antiseense | 5.02 | 5.00 | 4.68 | 5.12 | 3.60 | 3.52 | 3.87 | 3.23 |
| Down | ENSMUSG00000090050 | -4.40 | 2.07E-07 | Gm16339       | antiseense | 3.81 | 3.73 | 3.54 | 3.98 | 2.37 | 2.24 | 2.00 | 2.00 |
| Down | ENSMUSG00000108709 | -3.62 | 2.18E-07 | 4933431G14Rik | antiseense | 3.50 | 2.86 | 3.60 | 3.60 | 2.13 | 2.53 | 2.00 | 2.00 |
| Down | ENSMUSG00000097882 | -1.87 | 2.21E-07 | 0610038B21Rik | antiseense | 4.07 | 3.92 | 4.49 | 4.12 | 3.87 | 4.12 | 3.13 | 3.39 |
| Down | ENSMUSG00000087111 | -2.33 | 2.26E-07 | Gm11399       | antiseense | 4.48 | 4.58 | 4.57 | 4.39 | 2.57 | 3.56 | 2.79 | 2.62 |
| Down | ENSMUSG00000056735 | -1.32 | 2.50E-07 | A930024E05Rik | antiseense | 5.10 | 5.04 | 5.17 | 5.28 | 4.22 | 3.65 | 4.22 | 4.08 |
| Up   | ENSMUSG00000086606 | 1.39  | 2.58E-07 | Gm13205       | antiseense | 4.54 | 4.89 | 4.24 | 4.37 | 5.54 | 5.62 | 5.86 | 5.95 |
| Up   | ENSMUSG00000090758 | 1.00  | 2.97E-07 | Gm17178       | antiseense | 5.82 | 5.88 | 5.78 | 5.38 | 6.42 | 6.88 | 6.77 | 6.58 |
| Up   | ENSMUSG00000114633 | 1.05  | 3.35E-07 | Gm46416       | antiseense | 5.28 | 5.58 | 5.82 | 5.53 | 6.58 | 6.22 | 6.83 | 6.50 |
| Down | ENSMUSG00000086049 | -2.39 | 3.38E-07 | Gm12735       | antiseense | 6.39 | 6.46 | 5.91 | 6.43 | 3.92 | 5.16 | 2.79 | 3.99 |
| Down | ENSMUSG00000111171 | -5.77 | 3.59E-07 | Gm47815       | antiseense | 3.38 | 2.66 | 3.49 | 3.60 | 2.00 | 2.00 | 2.12 | 2.12 |
| Down | ENSMUSG00000114708 | -2.62 | 3.78E-07 | Gm30177       | antiseense | 3.38 | 4.72 | 4.17 | 4.17 | 2.00 | 2.12 | 3.30 | 2.54 |
| Down | ENSMUSG00000108624 | -3.39 | 3.82E-07 | Gm45091       | antiseense | 4.39 | 4.20 | 4.27 | 4.25 | 2.37 | 2.00 | 2.93 | 2.34 |
| Down | ENSMUSG00000107317 | -2.06 | 3.97E-07 | Gm19719       | antiseense | 4.70 | 5.04 | 4.73 | 4.78 | 3.73 | 3.05 | 3.13 | 3.17 |
| Down | ENSMUSG00000086039 | -5.84 | 3.98E-07 | Gm12227       | antiseense | 2.75 | 2.95 | 3.01 | 3.15 | 2.00 | 2.00 | 2.00 | 2.00 |
| Down | ENSMUSG00000086614 | -4.26 | 4.16E-07 | Gm14330       | antiseense | 3.44 | 3.19 | 3.89 | 3.21 | 2.00 | 2.00 | 2.00 | 2.44 |
| Down | ENSMUSG00000079467 | -1.67 | 4.30E-07 | Gm14966       | antiseense | 4.07 | 4.31 | 4.40 | 4.40 | 3.35 | 3.47 | 2.79 | 3.23 |
| Up   | ENSMUSG00000087002 | 1.27  | 4.34E-07 | Gm16277       | antiseense | 5.15 | 5.00 | 5.46 | 5.11 | 6.41 | 6.55 | 6.33 | 6.15 |
| Down | ENSMUSG00000086375 | -4.17 | 4.63E-07 | Gm12127       | antiseense | 3.81 | 3.26 | 3.80 | 3.50 | 2.00 | 2.00 | 2.00 | 2.54 |
| Down | ENSMUSG00000097101 | -2.23 | 5.32E-07 | 1810034E14Rik | antiseense | 3.38 | 3.52 | 3.75 | 4.19 | 2.25 | 2.44 | 2.79 | 2.78 |
| Down | ENSMUSG00000054556 | -2.16 | 5.95E-07 | Gm4876        | antiseense | 3.67 | 4.44 | 4.27 | 4.50 | 2.98 | 2.98 | 2.71 | 3.12 |
| Down | ENSMUSG00000114891 | -4.12 | 6.69E-07 | Gm47272       | antiseense | 3.67 | 3.63 | 3.09 | 3.01 | 2.00 | 2.00 | 2.00 | 2.44 |
| Down | ENSMUSG00000112824 | -5.83 | 7.52E-07 | Gm47917       | antiseense | 3.61 | 2.86 | 3.49 | 3.39 | 2.00 | 2.00 | 2.13 | 2.00 |
| Down | ENSMUSG00000108079 | -1.63 | 8.55E-07 | Gm42210       | antiseense | 5.02 | 5.38 | 5.19 | 5.44 | 4.25 | 4.13 | 3.50 | 3.96 |
| Down | ENSMUSG00000109282 | -2.43 | 8.71E-07 | Gm45188       | antiseense | 3.99 | 3.78 | 3.78 | 2.00 | 2.00 | 2.12 | 3.00 | 2.78 |
| Down | ENSMUSG00000104507 | -1.19 | 8.79E-07 | A430027H14Rik | antiseense | 5.57 | 5.49 | 6.04 | 5.69 | 4.10 | 4.68 | 4.47 | 5.15 |
| Down | ENSMUSG00000109854 | -6.06 | 9.12E-07 | Gm45345       | antiseense | 4.03 | 2.55 | 3.70 | 3.39 | 2.00 | 2.00 | 2.13 | 2.00 |
| Down | ENSMUSG00000098024 | -6.36 | 9.25E-07 | Gm27003       | antiseense | 3.67 | 3.33 | 4.17 | 3.55 | 2.00 | 2.12 | 2.00 | 2.00 |
| Down | ENSMUSG00000109382 | -3.18 | 9.51E-07 | 4930567K12Rik | antiseense | 2.85 | 3.78 | 3.43 | 3.45 | 2.37 | 2.00 | 2.00 | 2.54 |
| Down | ENSMUSG00000098066 | -1.12 | 1.07E-06 | Gm26944       | antiseense | 6.38 | 6.60 | 6.33 | 6.25 | 4.28 | 5.58 | 5.76 | 5.40 |
| Down | ENSMUSG00000098146 | -2.60 | 1.14E-06 | Gm26935       | antiseense | 3.50 | 3.63 | 3.49 | 3.60 | 2.00 | 2.70 | 2.45 | 2.34 |
| Down | ENSMUSG00000086708 | -5.50 | 1.26E-06 | Gm15577       | antiseense | 2.75 | 3.78 | 3.80 | 3.86 | 2.00 | 2.00 | 2.00 | 2.24 |
| Down | ENSMUSG00000115222 | -2.28 | 1.27E-06 | Gm49747       | antiseense | 4.95 | 5.12 | 5.29 | 5.38 | 3.17 | 3.91 | 2.00 | 3.89 |
| Down | ENSMUSG00000086938 | -1.50 | 1.27E-06 | 4930481A15Rik | antiseense | 4.80 | 5.12 | 5.13 | 5.28 | 4.58 | 4.58 | 3.67 | 5.27 |
| Down | ENSMUSG00000087129 | -2.03 | 1.38E-06 | Gm16316       | antiseense | 3.56 | 3.73 | 3.54 | 3.60 | 2.74 | 2.53 | 2.13 | 2.85 |
| Down | ENSMUSG00000089994 | -4.39 | 1.74E-06 | Gm16239       | antiseense | 4.22 | 2.55 | 3.43 | 3.50 | 2.00 | 2.24 | 2.00 | 2.24 |
| Down | ENSMUSG00000086971 |       |          |               |            |      |      |      |      |      |      |      |      |

|      |                     |       |          |               |            |      |      |      |      |      |      |      |      |
|------|---------------------|-------|----------|---------------|------------|------|------|------|------|------|------|------|------|
| Down | ENSMUSG00000085391  | -2.93 | 2.18E-06 | Gm16150       | antiseense | 3.77 | 2.76 | 3.54 | 3.55 | 2.37 | 2.00 | 2.13 | 2.62 |
| Down | ENSMUSG00000090117  | -1.16 | 2.30E-06 | Gm16541       | antiseense | 6.08 | 6.34 | 6.17 | 6.33 | 5.01 | 5.81 | 4.65 | 4.93 |
| Up   | ENSMUSG00000090761  | 1.21  | 2.31E-06 | Gm17201       | antiseense | 5.04 | 5.08 | 4.97 | 4.31 | 6.15 | 6.23 | 5.86 | 5.52 |
| Up   | ENSMUSG000000100812 | 1.07  | 2.32E-06 | A730098A19Rik | antiseense | 4.57 | 4.72 | 5.31 | 4.60 | 6.04 | 5.90 | 5.70 | 5.47 |
| Down | ENSMUSG000000084890 | -1.22 | 2.43E-06 | A830036E02Rik | antiseense | 6.98 | 7.02 | 7.35 | 7.35 | 5.44 | 5.25 | 6.68 | 6.23 |
| Down | ENSMUSG000000109501 | -1.95 | 2.49E-06 | Gm14377       | antiseense | 3.50 | 3.92 | 3.49 | 3.45 | 2.82 | 2.85 | 2.45 | 2.24 |
| Up   | ENSMUSG000000093916 | 1.09  | 2.55E-06 | Gm16726       | antiseense | 6.11 | 5.93 | 5.77 | 6.00 | 6.99 | 6.99 | 6.71 | 6.94 |
| Down | ENSMUSG000000108714 | -5.82 | 2.62E-06 | Gm21057       | antiseense | 2.43 | 3.46 | 3.16 | 2.59 | 2.00 | 2.00 | 2.00 | 2.00 |
| Down | ENSMUSG000000110824 | -3.08 | 2.74E-06 | Gm48677       | antiseense | 3.02 | 3.11 | 3.49 | 3.27 | 2.00 | 2.00 | 2.13 | 2.62 |
| Down | ENSMUSG000000114088 | -1.07 | 3.23E-06 | Gm47898       | antiseense | 5.13 | 5.31 | 5.68 | 5.35 | 4.74 | 4.62 | 3.90 | 4.46 |
| Down | ENSMUSG000000056753 | -1.21 | 3.64E-06 | C330011M18Rik | antiseense | 5.66 | 5.75 | 5.89 | 5.41 | 3.85 | 4.80 | 4.54 | 5.02 |
| Down | ENSMUSG000000106702 | -1.12 | 4.82E-06 | Gm42846       | antiseense | 6.12 | 6.17 | 5.57 | 6.10 | 4.70 | 5.25 | 4.65 | 5.23 |
| Down | ENSMUSG000000087293 | -2.91 | 5.48E-06 | Gm14341       | antiseense | 4.59 | 4.27 | 3.80 | 4.28 | 2.57 | 2.00 | 3.24 | 2.24 |
| Down | ENSMUSG000000104894 | -2.11 | 5.80E-06 | Gm43507       | antiseense | 4.07 | 3.63 | 3.75 | 3.27 | 2.25 | 3.11 | 2.54 | 2.34 |
| Down | ENSMUSG000000115692 | -1.93 | 5.96E-06 | Gm49163       | antiseense | 3.72 | 4.86 | 4.68 | 4.39 | 3.04 | 2.00 | 3.45 | 3.57 |
| Down | ENSMUSG000000102899 | -3.19 | 7.05E-06 | Gm37850       | antiseense | 3.25 | 3.78 | 2.93 | 3.55 | 2.00 | 2.24 | 2.13 | 2.54 |
| Down | ENSMUSG000000087439 | -2.62 | 7.19E-06 | Gm15788       | antiseense | 4.54 | 4.27 | 3.97 | 3.82 | 2.47 | 2.00 | 3.35 | 2.44 |
| Down | ENSMUSG000000053049 | -2.38 | 7.21E-06 | Gm15413       | antiseense | 3.77 | 3.19 | 3.23 | 3.82 | 2.47 | 2.44 | 2.24 | 2.54 |
| Up   | ENSMUSG000000099096 | 1.15  | 7.49E-06 | 1110035H17Rik | antiseense | 4.75 | 4.67 | 4.65 | 4.15 | 5.69 | 5.73 | 5.50 | 5.36 |
| Down | ENSMUSG000000089711 | 1.59  | 7.54E-06 | Gm16240       | antiseense | 4.48 | 4.56 | 4.46 | 3.55 | 4.61 | 5.81 | 6.31 | 5.55 |
| Down | ENSMUSG000000097416 | -5.14 | 7.57E-06 | Gm26670       | antiseense | 4.03 | 3.46 | 3.65 | 3.86 | 2.00 | 2.24 | 2.12 | 2.00 |
| Down | ENSMUSG000000087201 | -3.91 | 7.63E-06 | Gm15261       | antiseense | 3.38 | 3.26 | 3.65 | 4.02 | 2.00 | 2.00 | 2.00 | 2.62 |
| Down | ENSMUSG000000093553 | -1.57 | 7.78E-06 | Gm20633       | antiseense | 5.00 | 4.64 | 5.11 | 5.19 | 4.47 | 3.69 | 3.45 | 2.99 |
| Down | ENSMUSG000000093424 | -2.76 | 8.14E-06 | 6330562C20Rik | antiseense | 3.50 | 4.09 | 3.65 | 3.65 | 2.74 | 2.53 | 2.00 | 2.34 |
| Down | ENSMUSG000000086342 | -5.88 | 8.39E-06 | Gm12932       | antiseense | 3.18 | 2.43 | 3.16 | 2.00 | 2.00 | 2.00 | 2.00 | 2.00 |
| Down | ENSMUSG000000093528 | -2.93 | 8.43E-06 | Nrg3os        | antiseense | 3.10 | 2.86 | 3.09 | 3.78 | 2.57 | 2.24 | 2.00 | 2.12 |
| Down | ENSMUSG000000112227 | -2.46 | 8.65E-06 | Gm20149       | antiseense | 3.31 | 3.19 | 3.43 | 3.60 | 2.00 | 2.00 | 2.63 | 2.70 |
| Down | ENSMUSG000000087668 | -5.35 | 8.68E-06 | Gm11186       | antiseense | 2.65 | 2.30 | 3.01 | 2.94 | 2.00 | 2.00 | 2.00 | 2.00 |
| Down | ENSMUSG000000085655 | -1.33 | 9.11E-06 | Gm15952       | antiseense | 4.82 | 4.74 | 4.89 | 4.58 | 2.90 | 3.91 | 3.83 | 3.99 |
| Down | ENSMUSG000000086995 | -2.58 | 9.46E-06 | Gm13544       | antiseense | 4.29 | 4.44 | 4.87 | 4.12 | 2.13 | 2.12 | 3.79 | 3.62 |
| Up   | ENSMUSG000000085541 | 1.70  | 9.60E-06 | Gm16010       | antiseense | 3.38 | 4.05 | 3.01 | 3.98 | 5.10 | 5.17 | 4.77 | 4.62 |
| Down | ENSMUSG000000110652 | -3.50 | 1.01E-05 | Gm33023       | antiseense | 2.85 | 3.73 | 3.23 | 3.45 | 2.00 | 2.00 | 2.62 | 2.00 |
| Down | ENSMUSG000000093393 | -2.27 | 1.01E-05 | Gm20642       | antiseense | 3.96 | 3.43 | 3.97 | 2.97 | 2.12 | 2.00 | 2.00 | 2.00 |
| Down | ENSMUSG000000072573 | -5.58 | 1.10E-05 | Gm10369       | antiseense | 2.43 | 3.03 | 2.69 | 3.00 | 2.00 | 2.00 | 2.00 | 2.00 |
| Down | ENSMUSG000000087672 | -2.82 | 1.13E-05 | Gm15122       | antiseense | 3.18 | 3.33 | 3.93 | 3.65 | 2.00 | 2.34 | 2.79 | 2.12 |
| Down | ENSMUSG000000087202 | -2.16 | 1.13E-05 | Gm15813       | antiseense | 4.18 | 3.63 | 4.63 | 4.05 | 2.37 | 2.12 | 3.13 | 3.39 |
| Down | ENSMUSG000000104987 | -5.55 | 1.15E-05 | 2810432F15Rik | antiseense | 2.43 | 3.03 | 2.29 | 3.33 | 2.00 | 2.00 | 2.00 | 2.00 |
| Down | ENSMUSG000000116125 | -2.50 | 1.16E-05 | Gm41361       | antiseense | 4.22 | 3.92 | 4.05 | 3.50 | 2.74 | 2.12 | 2.00 | 3.17 |
| Down | ENSMUSG000000104574 | -1.84 | 1.16E-05 | Gm42836       | antiseense | 4.67 | 3.68 | 4.46 | 3.60 | 2.82 | 3.17 | 3.19 | 2.70 |
| Down | ENSMUSG000000085397 | -2.60 | 1.19E-05 | Gm13524       | antiseense | 3.44 | 3.57 | 2.93 | 3.60 | 2.13 | 2.12 | 2.45 | 2.62 |
| Up   | ENSMUSG000000085628 | 1.10  | 1.27E-05 | Appbp2os      | antiseense | 4.39 | 5.04 | 4.54 | 4.91 | 5.98 | 5.61 | 5.49 | 5.77 |
| Down | ENSMUSG000000086387 | -5.41 | 1.41E-05 | Gm15563       | antiseense | 2.65 | 2.43 | 3.01 | 2.94 | 2.00 | 2.00 | 2.00 | 2.00 |
| Down | ENSMUSG000000101126 | -1.86 | 1.41E-05 | Gm10538       | antiseense | 3.31 | 3.39 | 3.60 | 3.78 | 2.66 | 2.62 | 2.24 | 2.85 |
| Down | ENSMUSG000000102784 | -2.82 | 1.44E-05 | Gm38251       | antiseense | 3.67 | 2.86 | 3.54 | 3.69 | 2.82 | 2.00 | 2.34 | 2.85 |
| Down | ENSMUSG000000086269 | -2.21 | 1.84E-05 | Tmcc3os       | antiseense | 3.81 | 3.52 | 3.60 | 3.39 | 2.25 | 2.70 | 2.63 | 2.44 |
| Down | ENSMUSG000000086505 | -5.26 | 1.85E-05 | Gm16058       | antiseense | 3.31 | 2.66 | 3.49 | 2.40 | 2.00 | 2.00 | 2.12 | 2.12 |
| Down | ENSMUSG000000092793 | -2.57 | 1.85E-05 | Gm26676       | antiseense | 3.67 | 3.63 | 3.60 | 3.69 | 2.00 | 2.00 | 2.54 | 2.54 |
| Down | ENSMUSG000000087307 | -2.93 | 1.90E-05 | Gm12925       | antiseense | 3.18 | 3.19 | 3.16 | 3.08 | 2.13 | 2.53 | 2.00 | 2.12 |
| Down | ENSMUSG000000097925 | -1.74 | 2.01E-05 | Gm26574       | antiseense | 4.45 | 4.31 | 4.46 | 4.43 | 3.23 | 2.85 | 2.86 | 3.66 |
| Down | ENSMUSG000000113434 | -1.63 | 2.12E-05 | 3200001D21Rik | antiseense | 3.77 | 4.13 | 4.37 | 4.22 | 2.74 | 3.05 | 3.13 | 3.29 |
| Down | ENSMUSG000000102097 | -1.67 | 2.14E-05 | A930006L05Rik | antiseense | 3.31 | 3.83 | 3.49 | 3.60 | 2.85 | 2.93 | 2.78 | 2.78 |
| Down | ENSMUSG000000085080 | -1.91 | 2.18E-05 | 2310044K18Rik | antiseense | 4.26 | 4.53 | 4.80 | 3.94 | 3.50 | 2.70 | 3.07 | 3.06 |
| Down | ENSMUSG000000113317 | -2.29 | 2.34E-05 | Gm48573       | antiseense | 4.32 | 4.47 | 3.54 | 3.45 | 2.82 | 2.24 | 2.63 | 2.99 |
| Down | ENSMUSG000000086450 | -2.94 | 2.36E-05 | Macro2os1     | antiseense | 2.85 | 3.68 | 3.93 | 4.12 | 2.57 | 2.00 | 2.00 | 2.78 |
| Up   | ENSMUSG000000107368 | 1.14  | 2.40E-05 | 1700018A23Rik | antiseense | 5.62 | 6.12 | 5.83 | 6.02 | 7.09 | 7.05 | 6.96 | 6.91 |
| Down | ENSMUSG000000098322 | -2.73 | 2.48E-05 | 5830468F06Rik | antiseense | 2.43 | 3.73 | 4.05 | 4.09 | 2.37 | 2.34 | 2.12 | 2.12 |
| Down | ENSMUSG000000114704 | -5.32 | 2.50E-05 | Gm48003       | antiseense | 2.65 | 3.19 | 2.54 | 2.49 | 2.00 | 2.00 | 2.00 | 2.00 |
| Down | ENSMUSG000000093721 | -2.11 | 2.52E-05 | Gm3896        | antiseense | 3.72 | 3.63 | 3.80 | 3.72 | 3.17 | 2.00 | 2.00 | 2.54 |
| Down | ENSMUSG000000093723 | -2.00 | 2.53E-05 | Gm19667       | antiseense | 3.44 | 4.58 | 3.43 | 3.33 | 2.90 | 2.92 | 2.54 | 2.34 |
| Down | ENSMUSG000000092255 | -2.09 | 2.64E-05 | 4921534H16Rik | antiseense | 3.67 | 3.68 | 4.09 | 3.82 | 2.74 | 2.00 | 2.93 | 2.85 |
| Down | ENSMUSG000000093672 | -2.61 | 2.75E-05 | Gm20655       | antiseense | 3.72 | 3.63 | 3.84 | 3.60 | 2.82 | 2.44 | 2.00 | 2.44 |
| Up   | ENSMUSG000000103961 | 1.64  | 2.85E-05 | Gm36388       | antiseense | 3.31 | 3.83 | 3.60 | 3.39 | 4.99 | 4.78 | 4.38 | 4.98 |
| Down | ENSMUSG000000087082 | -3.33 | 3.13E-05 | Gm15423       | antiseense | 3.72 | 3.46 | 3.43 | 2.77 | 2.00 | 2.00 | 2.00 | 2.70 |
| Down | ENSMUSG000000108239 | -2.82 | 3.34E-05 | Gm19434       | antiseense | 3.10 | 3.68 | 4.01 | 3.55 | 2.00 | 2.62 | 2.00 | 2.70 |
| Down | ENSMUSG000000113634 | -2.53 | 3.47E-05 | Gm36756       | antiseense | 4.61 | 3.19 | 3.43 | 3.74 | 2.00 | 2.00 | 2.24 | 3.06 |
| Down | ENSMUSG000000090779 | -1.11 | 3.79E-05 | Gm17110       | antiseense | 4.93 | 5.15 | 5.15 | 5.04 | 4.06 | 4.56 | 3.35 | 4.33 |
| Down | ENSMUSG000000087516 | -4.97 | 3.83E-05 | Tbx3os1       | antiseense | 3.67 | 3.26 | 3.70 | 3.90 | 2.00 | 2.24 | 2.13 | 2.00 |
| Down | ENSMUSG000000087256 | -3.85 | 3.98E-05 | Gm15990       | antiseense | 2.65 | 2.86 | 3.65 | 3.45 | 2.00 | 2.00 | 2.35 | 2.12 |
| Down | ENSMUSG000000090220 | -2.29 | 3.99E-05 | Pitpnm2os1    | antiseense | 2.85 | 4.17 | 3.70 | 3.33 | 2.57 | 2.70 | 2.00 | 2.62 |
| Down | ENSMUSG000000087381 | -1.20 | 4.08E-05 | Gm16008       | antiseense | 3.77 | 4.17 | 4.24 | 4.45 | 3.05 | 2.93 | 2.70 | 2.62 |
| Down | ENSMUSG000000111639 | -1.86 | 4.27E-05 | 1700019L13Rik | antiseense | 4.72 | 3.92 | 4.13 | 3.90 | 2.74 | 2.92 | 3.00 | 2.62 |
| Down | ENSMUSG000000114213 | -2.34 | 4.32E-05 | A430090L17Rik | antiseense | 3.44 | 3.83 | 3.43 | 3.55 | 2.57 | 3.11 | 2.00 | 2.24 |
| Down | ENSMUSG000000095823 | -4.85 | 4.64E-05 | Gm13012       | antiseense | 2.85 | 2.55 | 2.74 | 2.85 | 2.00 | 2.00 | 2.12 | 2.12 |
| Down | ENSMUSG000000092625 | -4.44 | 4.84E-05 | Gm20404       | antiseense | 3.56 | 2.30 | 3.36 | 3.15 | 2.47 | 2.00 | 2.00 | 2.12 |
| Down | ENSMUSG000000047807 | -4.22 | 4.71E-05 | 9330154K18Rik | antiseense | 2.30 | 3.11 | 3.54 | 3.50 | 2.37 | 2.00 | 2.00 | 2.00 |
| Down | ENSMUSG000000090057 | -3.42 | 4.71E-05 | Gm16333       | antiseense | 3.38 | 2.86 | 3.23 | 3.08 | 2.00 | 2.00 | 2.00 | 2.54 |
| Down | ENSMUSG000000078190 | -1.43 | 4.71E-05 | Dnm3os        | antiseense | 3.61 | 4.24 | 4.20 | 3.21 | 3.47 | 2.74 | 2.86 | 2.70 |
| Down | ENSMUSG000000100781 | -4.17 | 4.78E-05 | Gm29481       | antiseense | 3.02 | 3.57 | 3.16 | 2.77 | 2.00 | 2.00 | 2.34 | 2.34 |
| Up   | ENSMUSG000000086935 | 1.30  | 5.01E-05 | Gm15956       | antiseense | 3.81 | 4.01 | 4.49 | 4.15 | 4.54 | 5.23 | 5.63 | 5.29 |
| Up   | ENSMUSG000000086930 | 1.44  | 5.21E-05 | Frs3os        | antiseense | 4.67 | 4.34 | 5.07 | 4.96 | 6.59 | 6.14 | 5.52 | 5.93 |
| Down | ENSMUSG000000085449 | -2.67 | 5.50E-05 | Gm15520       | antiseense | 2.94 | 3.57 | 3.16 | 3.08 | 2.00 | 2.24 | 2.00 | 2.70 |
| Down | ENSMUSG000000097440 | -1.11 | 5.51E-05 | Gm6277        | antiseense | 6.54 | 6.45 | 6.02 | 6.67 | 4.78 | 5.63 | 5.10 | 5.86 |
| Down | ENSMUSG000000102014 | -3.00 | 5.59E-05 | 2900009J06Rik | antiseense | 3.61 | 4.20 | 3.89 | 3.21 | 2.82 | 2.00 | 2.00 | 2.54 |
| Down | ENSMUSG000000114662 | -4.53 | 5.69E-05 | Gm31683       | antiseense | 3.72 | 2.95 | 3.43 | 3.27 | 2.00 | 2.00 | 2.00 | 2.34 |
| Down | ENSMUSG000000100789 | -5.87 | 5.77E-05 | Gm29508       | antiseense | 3.02 | 3.39 | 2.93 |      |      |      |      |      |

|      |                    |       |          |               |           |      |      |      |      |      |      |      |      |
|------|--------------------|-------|----------|---------------|-----------|------|------|------|------|------|------|------|------|
| Up   | ENSMUSG00000110698 | 1.10  | 6.23E-05 | Gm45875       | antisense | 6.22 | 6.28 | 6.23 | 5.94 | 7.44 | 7.15 | 7.33 | 6.95 |
| Down | ENSMUSG00000085029 | -5.04 | 6.37E-05 | Gm13569       | antisense | 2.65 | 2.55 | 2.64 | 2.69 | 2.00 | 2.00 | 2.00 | 2.00 |
| Down | ENSMUSG00000109644 | -1.83 | 6.47E-05 | 0610005C13Rik | antisense | 3.72 | 4.44 | 4.30 | 4.58 | 3.45 | 3.28 | 2.71 | 2.70 |
| Down | ENSMUSG00000089744 | -4.87 | 6.48E-05 | Gm16146       | antisense | 2.43 | 2.95 | 3.49 | 2.27 | 2.00 | 2.00 | 2.00 | 2.12 |
| Down | ENSMUSG00000087064 | -2.12 | 6.78E-05 | Sap30bpos     | antisense | 2.94 | 3.88 | 3.65 | 3.86 | 2.90 | 2.53 | 2.00 | 2.70 |
| Down | ENSMUSG00000085269 | -1.64 | 6.83E-05 | Gm15777       | antisense | 4.54 | 4.77 | 4.24 | 4.65 | 3.17 | 3.52 | 2.13 | 4.02 |
| Down | ENSMUSG00000097269 | -2.88 | 7.17E-05 | Gm26786       | antisense | 4.23 | 4.23 | 4.73 | 4.76 | 4.17 | 2.00 | 2.38 | 3.34 |
| Down | ENSMUSG00000107709 | -3.04 | 7.80E-05 | 9430018G01Rik | antisense | 2.94 | 2.95 | 2.94 | 3.90 | 2.00 | 2.24 | 2.24 | 2.54 |
| Down | ENSMUSG00000080709 | -3.41 | 7.95E-05 | Gm13389       | antisense | 2.75 | 3.11 | 3.30 | 2.69 | 2.00 | 2.00 | 2.00 | 2.44 |
| Down | ENSMUSG00000098383 | -4.15 | 8.32E-05 | Gm27197       | antisense | 3.18 | 3.26 | 2.93 | 3.21 | 2.00 | 2.24 | 2.00 | 2.12 |
| Down | ENSMUSG00000109732 | -5.24 | 8.62E-05 | Gm45285       | antisense | 2.65 | 3.03 | 2.29 | 2.77 | 2.00 | 2.00 | 2.00 | 2.00 |
| Down | ENSMUSG00000091184 | -3.73 | 8.81E-05 | Gm17059       | antisense | 3.31 | 4.01 | 2.74 | 2.94 | 2.13 | 2.00 | 2.00 | 2.44 |
| Down | ENSMUSG00000097855 | -2.43 | 8.99E-05 | A930007119Rik | antisense | 3.86 | 4.24 | 4.80 | 4.74 | 2.13 | 3.43 | 2.00 | 3.34 |
| Up   | ENSMUSG00000098072 | 1.12  | 9.05E-05 | Gm26995       | antisense | 4.65 | 4.91 | 4.70 | 4.98 | 5.65 | 6.26 | 5.45 | 5.79 |
| Down | ENSMUSG00000085845 | -4.92 | 9.14E-05 | Gm13944       | antisense | 2.43 | 3.33 | 3.01 | 2.59 | 2.00 | 2.12 | 2.00 | 2.00 |
| Down | ENSMUSG00000055370 | -2.19 | 9.38E-05 | Gm9968        | antisense | 3.61 | 3.03 | 4.46 | 3.55 | 2.13 | 2.12 | 2.79 | 3.12 |
| Down | ENSMUSG00000097834 | -2.83 | 9.59E-05 | Gm26911       | antisense | 2.94 | 3.11 | 3.49 | 3.55 | 2.00 | 2.00 | 2.00 | 2.85 |
| Down | ENSMUSG00000109674 | -1.24 | 9.62E-05 | Gm45470       | antisense | 4.65 | 5.06 | 4.49 | 4.74 | 4.39 | 3.56 | 3.67 | 3.73 |
| Down | ENSMUSG00000113488 | -5.53 | 9.70E-05 | Gm47819       | antisense | 2.00 | 2.95 | 3.43 | 2.59 | 2.00 | 2.00 | 2.00 | 2.00 |
| Down | ENSMUSG00000085004 | -4.60 | 9.82E-05 | 5430427M07Rik | antisense | 3.50 | 2.95 | 2.42 | 2.69 | 2.00 | 2.00 | 2.00 | 2.24 |
| Down | ENSMUSG00000108798 | -4.80 | 9.89E-05 | 492151306Rik  | antisense | 2.85 | 3.11 | 3.23 | 3.08 | 2.00 | 2.00 | 2.00 | 2.24 |
| Down | ENSMUSG00000112730 | -2.58 | 9.89E-05 | 4930567K20Rik | antisense | 3.10 | 3.19 | 3.54 | 3.08 | 2.00 | 2.85 | 2.00 | 2.12 |
| Down | ENSMUSG00000089699 | -5.17 | 1.05E-04 | Gm1992        | antisense | 2.85 | 2.43 | 2.64 | 2.00 | 2.77 | 2.00 | 2.00 | 2.00 |
| Down | ENSMUSG00000114511 | -3.22 | 1.05E-04 | 0710001A04Rik | antisense | 2.94 | 3.39 | 3.16 | 2.59 | 2.00 | 2.12 | 2.00 | 2.44 |
| Down | ENSMUSG00000111846 | -3.72 | 1.08E-04 | Gm47271       | antisense | 2.75 | 3.57 | 2.86 | 2.00 | 2.00 | 2.00 | 2.00 | 2.44 |
| Down | ENSMUSG00000087131 | -1.97 | 1.08E-04 | Gm16152       | antisense | 3.99 | 3.52 | 3.70 | 3.15 | 3.04 | 2.24 | 2.24 | 2.78 |
| Down | ENSMUSG00000084908 | -4.90 | 1.13E-04 | C79798        | antisense | 2.54 | 2.66 | 2.74 | 2.38 | 2.00 | 2.00 | 2.00 | 2.00 |
| Down | ENSMUSG00000084859 | -2.30 | 1.17E-04 | 1700080N15Rik | antisense | 3.18 | 3.39 | 2.93 | 3.60 | 2.13 | 2.85 | 2.00 | 2.34 |
| Down | ENSMUSG00000114968 | -1.37 | 1.20E-04 | A630019I02Rik | antisense | 5.24 | 5.19 | 5.05 | 5.17 | 3.61 | 3.61 | 4.94 | 3.70 |
| Down | ENSMUSG00000113613 | -4.87 | 1.22E-04 | Gm40893       | antisense | 3.67 | 3.03 | 3.23 | 2.86 | 2.00 | 2.00 | 2.00 | 2.24 |
| Down | ENSMUSG00000115337 | -4.61 | 1.24E-04 | 4930570B17Rik | antisense | 3.31 | 2.86 | 3.20 | 2.77 | 2.00 | 2.00 | 2.00 | 2.24 |
| Down | ENSMUSG00000085279 | -2.49 | 1.25E-04 | Gm15965       | antisense | 2.85 | 2.86 | 3.36 | 3.27 | 2.57 | 2.34 | 2.00 | 2.12 |
| Down | ENSMUSG00000111564 | -4.74 | 1.25E-04 | Gm47037       | antisense | 3.56 | 3.88 | 3.36 | 3.08 | 2.00 | 2.00 | 2.00 | 2.34 |
| Down | ENSMUSG00000086356 | -5.54 | 1.33E-04 | Gm13441       | antisense | 2.85 | 2.30 | 2.54 | 3.99 | 2.00 | 2.00 | 2.00 | 2.00 |
| Down | ENSMUSG00000115667 | -2.00 | 1.33E-04 | Gm10389       | antisense | 4.54 | 4.05 | 4.20 | 4.12 | 2.57 | 3.11 | 2.00 | 3.62 |
| Down | ENSMUSG00000086944 | -4.57 | 1.43E-04 | Gm15859       | antisense | 3.50 | 3.11 | 2.84 | 2.69 | 2.00 | 2.00 | 2.00 | 2.24 |
| Down | ENSMUSG00000108489 | -4.08 | 1.45E-04 | Gm45025       | antisense | 3.18 | 3.03 | 3.01 | 3.21 | 2.00 | 2.00 | 2.00 | 2.34 |
| Down | ENSMUSG00000097089 | -1.16 | 1.45E-04 | Gm26879       | antisense | 5.17 | 4.82 | 5.11 | 4.92 | 4.19 | 3.80 | 3.40 | 4.57 |
| Down | ENSMUSG00000092323 | -2.35 | 1.58E-04 | BB365896      | antisense | 3.10 | 4.17 | 3.70 | 3.60 | 2.47 | 2.00 | 2.63 | 2.85 |
| Down | ENSMUSG00000086507 | -2.43 | 1.60E-04 | Adap2os       | antisense | 3.67 | 4.13 | 4.24 | 4.05 | 3.11 | 2.00 | 2.00 | 3.12 |
| Down | ENSMUSG00000090237 | -3.84 | 1.61E-04 | Gm16308       | antisense | 3.10 | 3.78 | 3.09 | 3.50 | 2.13 | 2.00 | 2.00 | 2.44 |
| Down | ENSMUSG00000110433 | -2.82 | 1.61E-04 | Gm45820       | antisense | 3.10 | 3.03 | 3.09 | 3.50 | 2.00 | 2.44 | 2.00 | 2.44 |
| Up   | ENSMUSG00000102774 | 1.15  | 1.62E-04 | Gm9748        | antisense | 4.87 | 5.00 | 5.20 | 4.94 | 5.72 | 6.09 | 6.10 | 6.28 |
| Down | ENSMUSG00000091558 | -3.19 | 1.64E-04 | Gm17227       | antisense | 2.54 | 2.66 | 3.23 | 3.45 | 2.00 | 2.00 | 2.00 | 2.54 |
| Down | ENSMUSG00000113907 | -1.46 | 1.67E-04 | Gm47167       | antisense | 4.29 | 4.44 | 4.49 | 4.12 | 2.90 | 3.61 | 2.35 | 3.89 |
| Up   | ENSMUSG00000090024 | 1.20  | 1.68E-04 | Gm16350       | antisense | 5.00 | 5.08 | 4.80 | 4.80 | 5.51 | 5.85 | 5.48 | 5.48 |
| Down | ENSMUSG00000111911 | -4.96 | 1.70E-04 | Gm28009       | antisense | 2.54 | 3.11 | 3.01 | 2.86 | 2.00 | 2.12 | 2.00 | 2.12 |
| Down | ENSMUSG00000089729 | -3.27 | 1.79E-04 | Gm16552       | antisense | 2.75 | 2.95 | 2.64 | 3.21 | 2.00 | 2.00 | 2.00 | 2.00 |
| Down | ENSMUSG00000097251 | -1.37 | 1.79E-04 | 5033417F24Rik | antisense | 4.91 | 5.21 | 5.19 | 4.96 | 3.04 | 3.38 | 4.45 | 4.41 |
| Down | ENSMUSG00000086446 | -1.51 | 1.81E-04 | Prkag2os1     | antisense | 3.77 | 3.57 | 3.54 | 3.50 | 2.82 | 2.85 | 2.86 | 2.54 |
| Down | ENSMUSG00000104653 | -3.19 | 1.89E-04 | Gm43109       | antisense | 3.99 | 3.57 | 3.09 | 3.74 | 2.57 | 2.34 | 2.00 | 2.24 |
| Down | ENSMUSG00000045178 | -3.02 | 1.90E-04 | 493341O13Rik  | antisense | 3.02 | 3.11 | 3.16 | 3.01 | 2.00 | 2.00 | 2.00 | 2.62 |
| Down | ENSMUSG00000029837 | -3.17 | 1.91E-04 | 170011E14Rik  | antisense | 2.54 | 3.11 | 3.30 | 3.01 | 2.00 | 2.00 | 2.00 | 2.54 |
| Down | ENSMUSG00000091523 | -2.04 | 2.09E-04 | AU040972      | antisense | 2.75 | 3.19 | 3.65 | 3.33 | 2.47 | 2.85 | 2.00 | 2.24 |
| Down | ENSMUSG00000054779 | -2.81 | 2.27E-04 | Fgf2os        | antisense | 2.65 | 2.95 | 3.43 | 3.55 | 2.37 | 2.44 | 2.00 | 2.12 |
| Down | ENSMUSG00000097139 | -5.64 | 2.32E-04 | Gm26626       | antisense | 2.54 | 3.46 | 2.64 | 2.69 | 2.00 | 2.00 | 2.00 | 2.00 |
| Down | ENSMUSG00000110722 | -3.03 | 2.37E-04 | Gm48716       | antisense | 2.16 | 2.95 | 3.09 | 3.33 | 2.37 | 2.12 | 2.00 | 2.12 |
| Down | ENSMUSG00000085192 | -4.81 | 2.40E-04 | Gm12195       | antisense | 2.85 | 2.55 | 3.16 | 2.89 | 2.00 | 2.00 | 2.00 | 2.62 |
| Down | ENSMUSG00000086468 | -1.95 | 2.41E-04 | Gm11659       | antisense | 2.94 | 2.86 | 3.54 | 3.55 | 2.00 | 3.05 | 2.00 | 2.44 |
| Down | ENSMUSG00000106127 | -3.46 | 2.68E-04 | 4930520M14Rik | antisense | 2.85 | 3.46 | 2.64 | 2.94 | 2.00 | 2.00 | 2.00 | 2.44 |
| Down | ENSMUSG00000097404 | -1.17 | 2.88E-04 | Gm10814       | antisense | 4.89 | 4.69 | 4.82 | 4.42 | 3.85 | 3.80 | 4.04 | 3.44 |
| Down | ENSMUSG00000114788 | -1.36 | 2.97E-04 | Gm48899       | antisense | 4.89 | 4.24 | 4.46 | 4.74 | 3.23 | 3.91 | 3.45 | 3.62 |
| Down | ENSMUSG00000114595 | -4.60 | 3.00E-04 | Gm48004       | antisense | 2.16 | 2.16 | 2.29 | 3.08 | 2.00 | 2.00 | 2.00 | 2.00 |
| Down | ENSMUSG00000085623 | -2.39 | 3.19E-04 | Gm16041       | antisense | 3.50 | 3.11 | 3.09 | 2.77 | 2.00 | 2.53 | 2.00 | 2.12 |
| Down | ENSMUSG00000092182 | -4.51 | 3.22E-04 | Gm20407       | antisense | 2.54 | 2.55 | 2.74 | 2.94 | 2.00 | 2.00 | 2.00 | 2.12 |
| Down | ENSMUSG00000085581 | -4.45 | 3.23E-04 | Gm12786       | antisense | 2.43 | 2.86 | 2.64 | 2.77 | 2.00 | 2.00 | 2.00 | 2.12 |
| Down | ENSMUSG00000085471 | -2.25 | 3.24E-04 | 4933423P22Rik | antisense | 4.03 | 4.41 | 4.01 | 4.37 | 2.00 | 2.34 | 2.45 | 3.78 |
| Down | ENSMUSG00000097762 | -1.60 | 3.34E-04 | 4732463B04Rik | antisense | 4.48 | 4.50 | 4.68 | 5.11 | 3.48 | 2.34 | 4.00 | 3.74 |
| Down | ENSMUSG00000114291 | -3.44 | 3.45E-04 | Gm47471       | antisense | 3.18 | 3.52 | 2.74 | 2.27 | 2.00 | 2.44 | 2.00 | 2.00 |
| Down | ENSMUSG00000097472 | -1.08 | 3.47E-04 | Gm26586       | antisense | 6.33 | 6.38 | 6.56 | 6.30 | 5.90 | 5.20 | 4.79 | 5.46 |
| Down | ENSMUSG00000102540 | -3.42 | 3.56E-04 | Gm38134       | antisense | 2.75 | 3.11 | 3.30 | 2.69 | 2.00 | 2.44 | 2.00 | 2.00 |
| Down | ENSMUSG00000086468 | -2.84 | 3.63E-04 | Etaa1os       | antisense | 3.38 | 3.57 | 2.84 | 3.65 | 2.00 | 2.70 | 2.00 | 2.34 |
| Up   | ENSMUSG00000093725 | 1.36  | 3.65E-04 | Plat31        | antisense | 4.80 | 4.24 | 3.65 | 4.12 | 5.26 | 6.07 | 5.13 | 4.95 |
| Down | ENSMUSG00000110156 | 1.60  | 3.68E-04 | Gm42067       | antisense | 3.90 | 3.97 | 4.60 | 4.63 | 4.57 | 4.19 | 3.00 | 3.06 |
| Down | ENSMUSG00000097576 | -2.17 | 3.75E-04 | D930030I03Rik | antisense | 3.71 | 3.39 | 3.43 | 3.01 | 2.90 | 2.00 | 2.24 | 2.62 |
| Down | ENSMUSG00000085234 | -4.21 | 3.78E-04 | Gm15614       | antisense | 3.31 | 3.26 | 3.30 | 2.77 | 2.00 | 2.00 | 2.00 | 2.34 |
| Down | ENSMUSG00000086275 | -5.24 | 3.85E-04 | 1700121C08Rik | antisense | 2.75 | 3.19 | 2.93 | 3.21 | 2.00 | 3.12 | 2.00 | 2.12 |
| Down | ENSMUSG00000085265 | -2.98 | 3.91E-04 | Nell1os       | antisense | 3.10 | 2.95 | 3.10 | 3.15 | 2.00 | 2.34 | 2.00 | 2.34 |
| Down | ENSMUSG00000085333 | -2.74 | 3.96E-04 | 1700030A11Rik | antisense | 3.50 | 3.83 | 3.23 | 3.65 | 2.00 | 2.53 | 2.63 | 2.24 |
| Down | ENSMUSG00000111415 | -1.57 | 3.99E-04 | Gm39325       | antisense | 4.39 | 4.31 | 4.24 | 4.25 | 3.04 | 3.69 | 3.00 | 2.99 |
| Down | ENSMUSG00000101156 | -1.87 | 4.08E-04 | Gm29114       | antisense | 4.62 | 3.78 | 4.05 | 4.02 | 3.29 | 3.17 | 2.00 | 3.06 |
| Down | ENSMUSG00000115529 | -1.30 | 4.24E-04 | 9630013A20Rik | antisense | 4.51 | 4.93 | 5.02 | 4.89 | 3.23 | 3.28 | 4.54 | 3.78 |
| Down | ENSMUSG00000084860 | -5.43 | 4.51E-04 | 2610204G07Rik | antisense | 2.75 | 3.11 | 2.54 | 2.69 | 2.00 | 2.00 | 2.00 | 2.00 |
| Down | ENSMUSG00000115610 | -2.96 | 4.60E-04 | Gm31251       | antisense | 2.65 | 2.76 | 3.01 | 3.55 | 2.00 | 2.24 | 2.00 | 2.44 |
| Down | ENSMUSG00000027196 | -2.14 | 4.61E-04 | Alkbh3os1     | antisense | 2.75 | 3.33 | 3.70 | 3.39 | 2.57 | 2.00 | 2.45 | 2.62 |
| Down | ENSMUSG00000086121 | -3.47 | 4.73E-04 | Gm16068       | antisense | 2.94 | 3.39 |      |      |      |      |      |      |



|      |                      |       |          |               |           |      |      |      |      |      |      |      |      |
|------|----------------------|-------|----------|---------------|-----------|------|------|------|------|------|------|------|------|
| Down | ENSMUSG00000107439   | -4.74 | 4.95E-04 | Gm45060       | antisense | 2.54 | 2.95 | 2.54 | 3.08 | 2.00 | 2.00 | 2.00 | 2.12 |
| Down | ENSMUSG00000086881   | -4.89 | 5.00E-04 | Gm13594       | antisense | 2.75 | 2.76 | 2.74 | 3.15 | 2.00 | 2.00 | 2.00 | 2.12 |
| Down | ENSMUSG00000097009   | -2.16 | 5.09E-04 | Gm26861       | antisense | 4.29 | 4.31 | 4.30 | 4.31 | 2.13 | 3.56 | 2.13 | 3.23 |
| Down | ENSMUSG000000087103  | -2.77 | 5.12E-04 | Gm13344       | antisense | 3.96 | 2.86 | 3.89 | 3.82 | 2.00 | 2.34 | 2.13 | 2.85 |
| Down | ENSMUSG000000113576  | -4.55 | 5.17E-04 | Gm47658       | antisense | 2.43 | 2.95 | 2.29 | 2.00 | 2.00 | 2.00 | 2.00 | 2.14 |
| Down | ENSMUSG000000101555  | -1.12 | 5.19E-04 | Gm28731       | antisense | 5.57 | 5.12 | 5.34 | 5.20 | 3.64 | 4.27 | 4.04 | 5.06 |
| Down | ENSMUSG000000115958  | -3.58 | 5.20E-04 | 493058J15Rik  | antisense | 2.75 | 3.46 | 3.16 | 2.77 | 2.00 | 2.00 | 2.13 | 2.34 |
| Down | ENSMUSG000000115244  | -2.74 | 5.37E-04 | Gm49002       | antisense | 3.25 | 3.52 | 3.23 | 2.94 | 2.24 | 2.24 | 2.24 | 2.62 |
| Down | ENSMUSG000000110831  | -2.44 | 5.40E-04 | Gm48159       | antisense | 4.15 | 5.04 | 4.82 | 4.58 | 2.74 | 2.24 | 2.35 | 3.95 |
| Down | ENSMUSG000000112663  | -1.55 | 5.58E-04 | C630031E19Rik | antisense | 3.61 | 4.97 | 5.11 | 4.53 | 2.74 | 3.52 | 4.00 | 3.44 |
| Up   | ENSMUSG000000085695  | 1.06  | 5.82E-04 | Gm15243       | antisense | 4.48 | 3.88 | 3.84 | 4.15 | 4.56 | 5.14 | 5.20 | 4.97 |
| Down | ENSMUSG000000085839  | -3.38 | 5.92E-04 | Gm15949       | antisense | 3.44 | 2.43 | 2.54 | 3.21 | 2.47 | 2.00 | 2.00 | 2.00 |
| Down | ENSMUSG000000114917  | -4.42 | 5.94E-04 | Gm48250       | antisense | 3.02 | 2.95 | 3.36 | 2.49 | 2.00 | 2.00 | 2.00 | 2.24 |
| Down | ENSMUSG000000086484  | -1.49 | 5.99E-04 | Nron          | antisense | 4.11 | 3.68 | 4.01 | 3.39 | 3.64 | 2.00 | 3.00 | 2.62 |
| Down | ENSMUSG000000085245  | -4.97 | 6.00E-04 | Gm11713       | antisense | 2.16 | 2.76 | 2.93 | 2.49 | 2.00 | 2.00 | 2.00 | 2.00 |
| Down | ENSMUSG000000114585  | -3.80 | 6.04E-04 | Gm32401       | antisense | 3.31 | 2.95 | 3.49 | 3.65 | 2.13 | 2.00 | 2.00 | 2.44 |
| Down | ENSMUSG000000079143  | -2.52 | 6.16E-04 | Abx111os1     | antisense | 2.65 | 3.03 | 2.93 | 3.39 | 2.00 | 2.44 | 2.00 | 2.44 |
| Up   | ENSMUSG000000093390  | 1.65  | 6.42E-04 | Gm20652       | antisense | 3.67 | 3.33 | 3.43 | 2.59 | 4.00 | 4.83 | 4.61 | 4.33 |
| Down | ENSMUSG000000100199  | -1.66 | 6.55E-04 | Gm20324       | antisense | 3.44 | 3.11 | 3.93 | 3.33 | 2.66 | 2.92 | 2.00 | 2.65 |
| Down | ENSMUSG000000100269  | -4.71 | 6.92E-04 | Gm28782       | antisense | 3.10 | 2.86 | 2.42 | 2.69 | 2.00 | 2.00 | 2.00 | 2.17 |
| Down | ENSMUSG000000085175  | -3.74 | 7.18E-04 | Gm11423       | antisense | 3.02 | 3.52 | 3.16 | 3.55 | 2.00 | 2.00 | 2.00 | 2.34 |
| Down | ENSMUSG000000098729  | -2.01 | 7.38E-04 | Gm27200       | antisense | 3.38 | 3.33 | 3.23 | 3.27 | 2.25 | 2.00 | 3.00 | 2.34 |
| Down | ENSMUSG000000086032  | -3.28 | 7.48E-04 | Gm15929       | antisense | 3.18 | 3.57 | 3.30 | 2.69 | 2.00 | 2.24 | 2.00 | 2.44 |
| Down | ENSMUSG000000108196  | -5.42 | 7.52E-04 | Gm36328       | antisense | 2.54 | 2.55 | 2.15 | 3.50 | 2.00 | 2.00 | 2.00 | 2.00 |
| Down | ENSMUSG000000097805  | -2.27 | 7.62E-04 | Gm17473       | antisense | 3.77 | 4.61 | 4.27 | 3.78 | 3.04 | 2.00 | 2.86 | 2.99 |
| Down | ENSMUSG00000010463   | -3.03 | 7.85E-04 | Gm28750       | antisense | 2.43 | 3.33 | 3.70 | 3.08 | 2.13 | 2.53 | 2.00 | 2.12 |
| Down | ENSMUSG000000086315  | -4.18 | 7.90E-04 | Ar14aos       | antisense | 3.25 | 3.68 | 2.84 | 2.69 | 2.00 | 2.12 | 2.00 | 2.24 |
| Down | ENSMUSG000000115518  | -1.96 | 8.00E-04 | Gm10791       | antisense | 4.29 | 4.72 | 5.11 | 4.12 | 3.69 | 2.44 | 2.24 | 3.81 |
| Down | ENSMUSG000000090860  | -1.67 | 8.26E-04 | Gm17134       | antisense | 3.99 | 3.73 | 3.75 | 4.09 | 2.24 | 2.54 | 2.99 | 2.99 |
| Down | ENSMUSG000000084987  | -3.92 | 8.93E-04 | Gm13134       | antisense | 3.81 | 3.19 | 3.01 | 2.77 | 2.00 | 2.00 | 2.00 | 2.44 |
| Down | ENSMUSG000000086233  | -1.99 | 9.31E-04 | Gm11816       | antisense | 2.85 | 3.03 | 3.49 | 3.27 | 2.00 | 2.00 | 2.00 | 2.85 |
| Down | ENSMUSG000000097111  | -1.13 | 9.47E-04 | Peak1os       | antisense | 5.06 | 4.82 | 4.75 | 3.85 | 4.30 | 3.07 | 4.31 | 4.31 |
| Down | ENSMUSG000000092616  | -2.00 | 9.69E-04 | 493213D19Rik  | antisense | 3.56 | 3.78 | 4.39 | 3.33 | 3.94 | 2.12 | 2.00 | 2.17 |
| Down | ENSMUSG000000086701  | -4.17 | 9.79E-04 | Gm13585       | antisense | 2.00 | 2.55 | 2.42 | 3.01 | 2.00 | 2.00 | 2.00 | 2.00 |
| Down | ENSMUSG000000104872  | -4.15 | 9.81E-04 | 1700008B11Rik | antisense | 2.85 | 2.95 | 3.09 | 2.49 | 2.00 | 2.00 | 2.00 | 2.24 |
| Down | ENSMUSG000000054391  | -2.89 | 1.00E-03 | 4930517O19Rik | antisense | 3.02 | 2.30 | 3.02 | 3.08 | 2.00 | 2.00 | 2.00 | 2.00 |
| Down | ENSMUSG000000109559  | -3.49 | 1.01E-03 | Gm34280       | antisense | 2.65 | 3.46 | 3.09 | 3.45 | 2.37 | 2.00 | 2.00 | 2.24 |
| Down | ENSMUSG000000087539  | -3.41 | 1.04E-03 | Gm13584       | antisense | 2.00 | 3.68 | 3.70 | 3.27 | 2.00 | 2.00 | 2.00 | 2.34 |
| Down | ENSMUSG000000089787  | -5.12 | 1.05E-03 | Gm15825       | antisense | 2.75 | 2.76 | 2.54 | 2.59 | 2.00 | 2.00 | 2.00 | 2.00 |
| Down | ENSMUSG000000096991  | -1.77 | 1.05E-03 | Gm26789       | antisense | 2.85 | 3.39 | 3.23 | 3.15 | 2.00 | 2.78 | 2.54 | 2.34 |
| Down | ENSMUSG000000097500  | -3.21 | 1.10E-03 | Gm26537       | antisense | 2.54 | 3.03 | 2.84 | 3.08 | 2.37 | 2.00 | 2.00 | 2.12 |
| Down | ENSMUSG000000092286  | -1.62 | 1.14E-03 | Dtnbos        | antisense | 3.44 | 3.33 | 3.93 | 3.33 | 2.00 | 3.38 | 2.71 | 2.24 |
| Down | ENSMUSG000000106719  | -2.86 | 1.17E-03 | Gm42556       | antisense | 3.10 | 2.55 | 2.84 | 2.94 | 2.00 | 2.13 | 2.44 | 2.44 |
| Down | ENSMUSG000000109604  | -2.73 | 1.17E-03 | Gm45346       | antisense | 4.51 | 4.41 | 4.87 | 3.55 | 3.80 | 2.00 | 2.00 | 2.00 |
| Down | ENSMUSG000000087530  | -3.34 | 1.21E-03 | Gm15533       | antisense | 3.18 | 3.46 | 2.74 | 3.01 | 2.12 | 2.00 | 2.00 | 2.00 |
| Down | ENSMUSG000000100402  | -4.62 | 1.22E-03 | Gm28505       | antisense | 2.00 | 2.86 | 2.42 | 2.59 | 2.00 | 2.00 | 2.00 | 2.00 |
| Down | ENSMUSG000000090839  | -3.59 | 1.22E-03 | Gm17094       | antisense | 3.59 | 4.01 | 3.80 | 2.86 | 2.00 | 2.00 | 2.00 | 2.24 |
| Down | ENSMUSG000000087507  | -5.04 | 1.24E-03 | Gm16141       | antisense | 2.30 | 2.95 | 2.54 | 2.69 | 2.00 | 2.00 | 2.00 | 2.00 |
| Down | ENSMUSG000000086872  | -4.30 | 1.24E-03 | Gm14225       | antisense | 2.43 | 2.16 | 2.54 | 2.00 | 2.00 | 2.00 | 2.00 | 2.00 |
| Down | ENSMUSG000000089755  | -5.14 | 1.25E-03 | 0610012D04Rik | antisense | 2.94 | 3.11 | 2.00 | 2.38 | 2.00 | 2.00 | 2.00 | 2.00 |
| Down | ENSMUSG000000084884  | -2.74 | 1.28E-03 | Gm12289       | antisense | 3.18 | 3.19 | 3.09 | 2.69 | 2.00 | 2.53 | 2.00 | 2.24 |
| Down | ENSMUSG000000089730  | -2.98 | 1.31E-03 | 1700007P06Rik | antisense | 3.72 | 3.26 | 3.60 | 3.33 | 2.25 | 2.00 | 2.00 | 2.78 |
| Down | ENSMUSG000000060808  | -4.31 | 1.32E-03 | B9d1os        | antisense | 2.54 | 2.55 | 3.43 | 3.01 | 2.00 | 2.00 | 2.00 | 2.24 |
| Down | ENSMUSG000000109107  | -4.85 | 1.33E-03 | Gm44781       | antisense | 2.30 | 2.43 | 2.42 | 3.01 | 2.00 | 2.00 | 2.00 | 2.00 |
| Down | ENSMUSG000000102027  | -5.19 | 1.35E-03 | Gm28914       | antisense | 2.54 | 2.95 | 2.74 | 2.49 | 2.00 | 2.00 | 2.00 | 2.00 |
| Down | ENSMUSG000000054493  | -1.68 | 1.38E-03 | Gm9947        | antisense | 3.56 | 4.20 | 4.30 | 3.94 | 3.29 | 2.98 | 2.00 | 3.29 |
| Down | ENSMUSG000000114438  | -2.64 | 1.39E-03 | Gm47827       | antisense | 2.30 | 2.66 | 3.30 | 3.08 | 2.24 | 2.00 | 2.44 | 2.44 |
| Up   | ENSMUSG000000086359  | 1.05  | 1.42E-03 | 9630013K17Rik | antisense | 4.01 | 3.05 | 4.01 | 3.71 | 4.41 | 4.51 | 4.85 | 4.63 |
| Down | ENSMUSG000000089849  | -3.92 | 1.42E-03 | Run2os2       | antisense | 2.65 | 4.03 | 2.29 | 2.94 | 2.00 | 2.00 | 2.00 | 2.24 |
| Down | ENSMUSG000000113895  | -1.89 | 1.42E-03 | Gm48363       | antisense | 3.65 | 2.95 | 3.49 | 3.55 | 2.13 | 2.70 | 2.00 | 2.70 |
| Down | ENSMUSG000000108648  | -2.82 | 1.50E-03 | Gm44674       | antisense | 2.94 | 2.76 | 3.01 | 2.69 | 2.00 | 2.00 | 2.00 | 2.24 |
| Down | ENSMUSG000000092309  | -4.18 | 1.52E-03 | 4930518C09Rik | antisense | 2.85 | 2.43 | 2.64 | 2.38 | 2.00 | 2.00 | 2.00 | 2.12 |
| Down | ENSMUSG000000085822  | -4.17 | 1.52E-03 | Gm15584       | antisense | 2.75 | 2.43 | 3.09 | 3.08 | 2.00 | 2.00 | 2.00 | 2.24 |
| Up   | ENSMUSG00000009568   | 1.56  | 1.53E-03 | Gm28513       | antisense | 3.86 | 3.73 | 4.20 | 3.21 | 5.62 | 5.20 | 3.97 | 4.95 |
| Down | ENSMUSG000000087086  | -2.20 | 1.54E-03 | Gm13269       | antisense | 3.10 | 3.19 | 3.43 | 4.02 | 2.90 | 2.53 | 2.00 | 2.34 |
| Down | ENSMUSG000000087630  | -4.47 | 1.70E-03 | Gm11513       | antisense | 3.56 | 2.16 | 2.15 | 2.38 | 2.00 | 2.00 | 2.00 | 2.12 |
| Down | ENSMUSG000000086942  | -2.12 | 1.73E-03 | Gm15489       | antisense | 3.38 | 4.41 | 3.54 | 3.55 | 3.40 | 2.12 | 2.00 | 2.62 |
| Down | ENSMUSG000000086184  | -2.41 | 1.75E-03 | Gm12764       | antisense | 2.94 | 3.63 | 3.09 | 2.77 | 2.00 | 2.12 | 2.24 | 2.70 |
| Down | ENSMUSG000000108883  | -1.88 | 1.75E-03 | Gm44623       | antisense | 2.94 | 3.63 | 3.43 | 3.60 | 2.47 | 2.00 | 2.86 | 2.70 |
| Down | ENSMUSG000000114154  | -2.76 | 1.76E-03 | Gm48597       | antisense | 2.75 | 2.66 | 3.60 | 3.01 | 2.53 | 2.00 | 2.00 | 2.24 |
| Down | ENSMUSG000000086350  | -1.44 | 1.76E-03 | B230369F24Rik | antisense | 4.78 | 4.58 | 5.02 | 4.76 | 3.77 | 3.33 | 4.30 | 3.62 |
| Down | ENSMUSG000000092448  | -1.11 | 1.81E-03 | Gm20387       | antisense | 4.18 | 5.23 | 5.05 | 4.70 | 2.74 | 3.94 | 4.50 | 4.08 |
| Down | ENSMUSG000000097613  | -2.53 | 1.82E-03 | Gm17587       | antisense | 3.65 | 3.95 | 2.54 | 2.46 | 2.13 | 2.54 | 2.00 | 2.54 |
| Down | ENSMUSG0000000937610 | 1.08  | 1.82E-03 | A930012L18Rik | antisense | 5.41 | 5.00 | 4.80 | 5.53 | 4.59 | 4.54 | 3.54 | 4.81 |
| Up   | ENSMUSG000000097250  | 2.16  | 1.85E-03 | Gm26771       | antisense | 2.85 | 3.39 | 2.74 | 3.01 | 4.79 | 5.32 | 3.67 | 4.23 |
| Down | ENSMUSG000000089709  | -2.55 | 1.86E-03 | Gm16262       | antisense | 3.67 | 3.57 | 2.74 | 3.45 | 2.90 | 2.00 | 2.00 | 2.34 |
| Down | ENSMUSG000000093617  | -1.65 | 1.86E-03 | 4933438K21Rik | antisense | 5.06 | 5.33 | 4.95 | 4.67 | 3.55 | 4.24 | 3.07 | 3.74 |
| Down | ENSMUSG000000102539  | -3.86 | 1.88E-03 | Gm37229       | antisense | 2.85 | 2.76 | 2.64 | 2.69 | 2.00 | 2.00 | 2.00 | 2.24 |
| Down | ENSMUSG000000053889  | -1.39 | 1.92E-03 | Kirrel3os     | antisense | 3.77 | 3.78 | 3.70 | 3.33 | 2.74 | 3.11 | 2.45 | 3.06 |
| Down | ENSMUSG000000111828  | -1.72 | 1.93E-03 | D830035M03Rik | antisense | 4.70 | 4.24 | 3.97 | 4.25 | 2.66 | 3.33 | 3.54 | 2.85 |
| Down | ENSMUSG000000086528  | -3.83 | 1.95E-03 | Gm15731       | antisense | 3.18 | 3.52 | 2.84 | 3.82 | 2.34 | 2.00 | 2.00 | 2.82 |
| Down | ENSMUSG000000090244  | -4.16 | 1.96E-03 | Gm16572       | antisense | 2.30 | 2.30 | 2.93 | 2.69 | 2.00 | 2.00 | 2.13 | 2.00 |
| Up   | ENSMUSG000000087571  | 2.54  | 1.97E-03 | Gm15202       | antisense | 2.30 | 2.30 | 2.64 | 2.77 | 2.37 | 4.24 | 4.24 | 3.78 |
| Down | ENSMUSG000000097360  | -1.78 | 1.98E-03 | 9430065F17Rik | antisense | 3.77 | 4.17 | 4.17 | 4.31 | 2.00 | 3.17 | 3.24 | 3.17 |
| Down | ENSMUSG000000075558  | -4.30 | 2.00E-03 | Gm17151       | antisense | 2.00 | 2.66 | 2.42 | 2.49 | 2.00 | 2.00 | 2.00 | 2.00 |
| Down | ENSMUSG000000114373  | -4.26 | 2.01E-03 |               |           |      |      |      |      |      |      |      |      |

|      |                    |       |          |               |           |      |      |      |      |      |        |      |      |
|------|--------------------|-------|----------|---------------|-----------|------|------|------|------|------|--------|------|------|
| Down | ENSMUSG00000100980 | -2.57 | 2.18E-03 | Gm29100       | antisense | 3.81 | 4.01 | 4.20 | 3.90 | 2.00 | 2.53   | 3.19 | 2.34 |
| Down | ENSMUSG00000112766 | -4.89 | 2.20E-03 | Gm40645       | antisense | 2.94 | 2.55 | 3.54 | 3.65 | 2.13 | 2.12   | 2.00 | 2.00 |
| Down | ENSMUSG00000074763 | -2.62 | 2.21E-03 | Macro2os2     | antisense | 2.75 | 3.39 | 3.65 | 3.90 | 2.00 | 3.05   | 2.00 | 2.12 |
| Up   | ENSMUSG00000089796 | 1.18  | 2.26E-03 | Gm16575       | antisense | 4.03 | 4.79 | 4.01 | 3.82 | 5.51 | 5.13   | 5.24 | 4.88 |
| Down | ENSMUSG00000074508 | -5.00 | 2.29E-03 | Gm10706       | antisense | 2.85 | 2.66 | 2.42 | 3.50 | 2.00 | 2.00   | 2.13 | 2.00 |
| Down | ENSMUSG00000070574 | -2.38 | 2.31E-03 | Z310016511Rik | antisense | 3.95 | 3.63 | 3.30 | 3.82 | 2.00 | 2.70   | 2.00 | 3.06 |
| Down | ENSMUSG00000086297 | -3.86 | 2.45E-03 | Gm15632       | antisense | 2.30 | 2.30 | 2.30 | 3.11 | 2.00 | 2.36   | 2.00 | 2.24 |
| Down | ENSMUSG00000101411 | -2.26 | 2.46E-03 | Gm28111       | antisense | 3.25 | 3.39 | 3.36 | 3.60 | 2.66 | 2.44   | 2.45 | 2.12 |
| Down | ENSMUSG00000086889 | -1.87 | 2.46E-03 | PHf2os1       | antisense | 3.25 | 3.78 | 3.36 | 3.69 | 2.00 | 2.70   | 2.93 | 2.62 |
| Down | ENSMUSG00000108190 | -4.81 | 2.60E-03 | Gm44731       | antisense | 2.43 | 3.19 | 2.84 | 2.77 | 2.00 | 2.12   | 2.00 | 2.00 |
| Down | ENSMUSG00000093695 | -3.79 | 2.67E-03 | Gm20717       | antisense | 2.16 | 2.55 | 3.01 | 2.94 | 2.25 | 2.00   | 2.00 | 2.00 |
| Down | ENSMUSG00000090101 | -2.65 | 2.67E-03 | Shng9         | antisense | 2.85 | 2.76 | 3.16 | 3.50 | 2.00 | 2.00   | 2.79 | 2.00 |
| Down | ENSMUSG00000085055 | -1.69 | 2.69E-03 | Gm15958       | antisense | 4.26 | 4.50 | 4.01 | 4.50 | 2.66 | 3.33   | 3.35 | 3.23 |
| Down | ENSMUSG00000104106 | -1.59 | 2.72E-03 | Gm10848       | antisense | 3.81 | 4.44 | 4.34 | 4.15 | 3.64 | 3.28   | 2.00 | 3.17 |
| Down | ENSMUSG00000085352 | -5.37 | 2.74E-03 | Gm4128        | antisense | 2.00 | 3.46 | 2.29 | 2.86 | 2.00 | 2.00   | 2.00 | 2.00 |
| Down | ENSMUSG00000087240 | -2.77 | 2.74E-03 | Gm15976       | antisense | 2.65 | 2.95 | 2.93 | 2.77 | 2.00 | 2.00   | 2.00 | 2.54 |
| Down | ENSMUSG00000086992 | -1.11 | 2.75E-03 | Gm15941       | antisense | 3.91 | 4.34 | 4.46 | 3.50 | 3.69 | 3.33   | 3.24 | 2.99 |
| Down | ENSMUSG00000086014 | -4.54 | 2.77E-03 | Gm16095       | antisense | 2.85 | 3.19 | 2.15 | 2.49 | 2.00 | 2.00   | 2.00 | 2.12 |
| Up   | ENSMUSG00000072999 | -2.10 | 2.81E-03 | Gm15401       | antisense | 3.44 | 4.34 | 4.17 | 3.90 | 3.50 | 2.00   | 2.00 | 2.99 |
| Up   | ENSMUSG00000085009 | 1.76  | 2.85E-03 | Gm12977       | antisense | 3.72 | 2.66 | 3.16 | 3.27 | 4.54 | 4.27   | 4.40 | 4.75 |
| Up   | ENSMUSG00000087399 | 1.23  | 2.87E-03 | Gm11859       | antisense | 3.73 | 4.30 | 3.74 | 3.74 | 4.99 | 5.52   | 5.08 | 3.66 |
| Down | ENSMUSG00000106005 | -2.12 | 2.87E-03 | Gm29151       | antisense | 3.77 | 3.88 | 3.89 | 4.05 | 2.00 | 3.43   | 2.00 | 2.85 |
| Down | ENSMUSG00000085418 | -2.02 | 2.88E-03 | Grip1os1      | antisense | 2.75 | 3.52 | 3.49 | 3.69 | 2.00 | 3.05   | 2.00 | 2.62 |
| Down | ENSMUSG00000105489 | -2.17 | 2.90E-03 | Gm38562       | antisense | 3.67 | 4.13 | 3.36 | 4.25 | 3.35 | 2.85   | 2.00 | 2.12 |
| Down | ENSMUSG00000085130 | -3.10 | 2.92E-03 | Gm11417       | antisense | 2.94 | 2.86 | 3.01 | 2.49 | 2.00 | 2.24   | 2.00 | 2.24 |
| Down | ENSMUSG00000087106 | -4.87 | 2.93E-03 | Gm13964       | antisense | 2.43 | 3.11 | 2.15 | 3.39 | 2.00 | 2.12   | 2.00 | 2.00 |
| Down | ENSMUSG00000089957 | -1.02 | 2.93E-03 | A830011K09Rik | antisense | 4.29 | 4.91 | 5.29 | 4.13 | 4.22 | 3.50   | 4.41 | 4.11 |
| Down | ENSMUSG00000113885 | -3.19 | 3.10E-03 | Gm47802       | antisense | 2.75 | 2.43 | 3.54 | 2.49 | 2.13 | 2.00   | 2.00 | 2.34 |
| Up   | ENSMUSG00000043168 | 1.73  | 3.17E-03 | 4930426D05Rik | antisense | 2.75 | 3.33 | 3.30 | 3.21 | 4.56 | 3.56   | 4.04 | 4.92 |
| Down | ENSMUSG00000085244 | -2.75 | 3.21E-03 | Spag17os      | antisense | 3.72 | 4.20 | 4.13 | 4.67 | 2.57 | 2.70   | 2.00 | 3.06 |
| Down | ENSMUSG00000087692 | -3.27 | 3.26E-03 | Gm11940       | antisense | 3.25 | 2.95 | 3.36 | 2.59 | 2.00 | 2.00   | 2.00 | 2.54 |
| Down | ENSMUSG00000107102 | -2.67 | 3.26E-03 | Gm42726       | antisense | 2.65 | 3.26 | 2.74 | 2.38 | 2.00 | 2.00   | 2.54 | 2.00 |
| Down | ENSMUSG00000085047 | -2.19 | 3.33E-03 | 49305423Rik   | antisense | 3.51 | 4.52 | 3.54 | 3.59 | 2.47 | 2.42   | 2.92 | 2.92 |
| Down | ENSMUSG00000085026 | -2.00 | 3.38E-03 | Srrm5         | antisense | 2.54 | 2.55 | 2.15 | 2.49 | 2.00 | 2.00   | 2.12 | 2.00 |
| Down | ENSMUSG00000051805 | -4.32 | 3.40E-03 | A530095I07Rik | antisense | 2.16 | 2.55 | 2.74 | 2.14 | 2.00 | 2.00   | 2.00 | 2.00 |
| Down | ENSMUSG00000086761 | -1.83 | 3.46E-03 | Cep112os1     | antisense | 4.03 | 4.67 | 4.20 | 4.48 | 2.24 | 3.77   | 3.45 | 2.44 |
| Down | ENSMUSG00000107766 | -4.84 | 3.56E-03 | Gm44073       | antisense | 2.00 | 2.55 | 2.42 | 3.08 | 2.00 | 2.00   | 2.00 | 2.00 |
| Down | ENSMUSG00000080727 | -1.46 | 3.61E-03 | C920021L13Rik | antisense | 4.75 | 4.13 | 4.46 | 4.85 | 3.33 | 2.33   | 2.79 | 4.25 |
| Down | ENSMUSG00000105784 | -2.71 | 3.69E-03 | Gm35065       | antisense | 3.81 | 3.33 | 3.70 | 3.27 | 2.00 | 2.12   | 2.00 | 3.06 |
| Down | ENSMUSG00000085459 | -2.02 | 3.86E-03 | Gm12272       | antisense | 2.75 | 2.76 | 2.93 | 3.01 | 2.00 | 2.78   | 2.00 | 2.12 |
| Down | ENSMUSG00000085239 | -2.30 | 3.87E-03 | Gm12150       | antisense | 3.99 | 3.68 | 3.80 | 3.55 | 2.82 | 2.00   | 3.13 | 2.00 |
| Down | ENSMUSG00000090075 | -4.83 | 3.89E-03 | Gm16251       | antisense | 2.85 | 2.43 | 2.74 | 2.00 | 2.14 | 2.00   | 2.00 | 2.00 |
| Down | ENSMUSG00000108006 | -2.16 | 3.89E-03 | Gm44418       | antisense | 3.02 | 2.66 | 3.49 | 2.38 | 2.47 | 2.12   | 2.00 | 2.44 |
| Down | ENSMUSG00000079048 | -3.73 | 3.99E-03 | 4933413L06Rik | antisense | 2.54 | 2.00 | 3.97 | 3.86 | 2.00 | 2.00   | 2.00 | 2.54 |
| Down | ENSMUSG00000101585 | -2.89 | 4.05E-03 | 1600010M07Rik | antisense | 3.56 | 3.46 | 4.09 | 3.08 | 2.34 | 2.00   | 2.00 | 2.85 |
| Down | ENSMUSG00000114230 | -1.63 | 4.05E-03 | Gm48239       | antisense | 4.48 | 4.34 | 5.19 | 4.91 | 4.03 | 2.00   | 3.79 | 3.57 |
| Down | ENSMUSG00000086053 | -4.34 | 4.07E-03 | Gm15178       | antisense | 2.43 | 2.86 | 2.29 | 2.00 | 2.00 | 2.00   | 2.00 | 2.00 |
| Down | ENSMUSG00000089941 | -1.31 | 4.12E-03 | Gm16168       | antisense | 4.07 | 4.27 | 3.80 | 3.39 | 3.04 | 3.28   | 3.35 | 2.54 |
| Down | ENSMUSG00000108012 | -3.17 | 4.21E-03 | Gm44012       | antisense | 3.10 | 2.43 | 2.64 | 3.15 | 2.00 | 2.00   | 2.00 | 2.44 |
| Down | ENSMUSG00000087035 | -2.96 | 4.25E-03 | Tmem74bos     | antisense | 3.18 | 3.33 | 3.23 | 3.98 | 2.25 | 2.62   | 2.00 | 2.24 |
| Down | ENSMUSG00000089781 | -1.32 | 4.28E-03 | Gm15756       | antisense | 3.99 | 3.68 | 3.80 | 4.02 | 3.04 | 2.98   | 3.07 | 3.12 |
| Up   | ENSMUSG00000097836 | 1.06  | 4.31E-03 | Gm26903       | antisense | 3.86 | 4.01 | 4.46 | 4.96 | 5.81 | 5.10   | 5.11 | 5.03 |
| Down | ENSMUSG00000109307 | -4.18 | 4.31E-03 | Gm44700       | antisense | 2.65 | 2.30 | 3.49 | 2.00 | 2.00 | 2.12   | 2.13 | 2.12 |
| Up   | ENSMUSG00000106969 | 1.59  | 4.37E-03 | Gm42882       | antisense | 2.65 | 3.57 | 2.84 | 2.69 | 4.56 | 3.98   | 3.71 | 3.44 |
| Down | ENSMUSG00000084804 | -4.06 | 4.41E-03 | 1700095J12Rik | antisense | 2.00 | 2.76 | 2.42 | 2.00 | 2.14 | 2.00   | 2.00 | 2.00 |
| Down | ENSMUSG00000107429 | -2.46 | 4.56E-03 | Gm44206       | antisense | 3.44 | 3.73 | 3.01 | 3.55 | 2.00 | 2.00   | 2.45 | 2.92 |
| Down | ENSMUSG00000085732 | -1.95 | 4.68E-03 | Gm4279        | antisense | 2.75 | 2.43 | 3.16 | 3.16 | 2.00 | 2.53   | 2.00 | 2.54 |
| Down | ENSMUSG00000115145 | -2.76 | 4.75E-03 | Gm35166       | antisense | 2.16 | 3.11 | 3.54 | 2.59 | 2.00 | 2.24   | 2.00 | 2.44 |
| Up   | ENSMUSG00000106526 | 1.29  | 4.79E-03 | Gm42604       | antisense | 3.38 | 2.76 | 3.80 | 2.86 | 4.42 | 4.16   | 4.16 | 4.57 |
| Down | ENSMUSG00000115787 | -3.33 | 4.79E-03 | Gm36146       | antisense | 2.43 | 3.03 | 2.54 | 2.94 | 2.00 | 2.00   | 2.00 | 2.00 |
| Down | ENSMUSG00000115092 | -3.01 | 4.84E-03 | Gm49189       | antisense | 3.67 | 2.86 | 2.93 | 2.69 | 2.00 | 2.00   | 2.00 | 2.62 |
| Down | ENSMUSG00000090033 | -2.60 | 4.89E-03 | Gm16243       | antisense | 2.94 | 2.55 | 3.09 | 2.38 | 2.57 | 2.00   | 2.00 | 2.00 |
| Down | ENSMUSG00000107427 | -1.54 | 5.05E-03 | Gm43948       | antisense | 3.44 | 3.46 | 3.65 | 3.21 | 2.37 | 2.44   | 2.45 | 3.23 |
| Down | ENSMUSG00000104234 | -6.08 | 5.23E-03 | 5330439B14Rik | antisense | 2.94 | 3.11 | 3.36 | 2.94 | 2.00 | 2.00   | 2.00 | 2.00 |
| Down | ENSMUSG00000086175 | -2.20 | 5.23E-03 | Gm15802       | antisense | 2.54 | 3.19 | 3.16 | 2.86 | 2.00 | 2.34   | 2.63 | 2.00 |
| Down | ENSMUSG00000090252 | -2.21 | 5.26E-03 | Gm16028       | antisense | 3.77 | 4.67 | 4.43 | 4.15 | 2.66 | 2.85   | 2.54 | 3.34 |
| Down | ENSMUSG00000104945 | -2.13 | 5.26E-03 | Gm35715       | antisense | 2.85 | 4.34 | 2.84 | 3.21 | 3.17 | 2.00   | 2.13 | 2.34 |
| Down | ENSMUSG00000104441 | -4.23 | 5.29E-03 | Gm35801       | antisense | 3.56 | 3.63 | 3.49 | 3.01 | 2.00 | 2.00   | 2.45 | 2.00 |
| Down | ENSMUSG00000109491 | -2.27 | 5.29E-03 | Gm15396       | antisense | 3.02 | 3.97 | 3.30 | 3.60 | 2.00 | 2.70   | 2.00 | 2.92 |
| Down | ENSMUSG00000087484 | -2.03 | 5.31E-03 | 2900089D17Rik | antisense | 3.02 | 2.66 | 3.23 | 3.50 | 2.00 | 2.44   | 2.00 | 2.85 |
| Down | ENSMUSG00000105130 | -3.93 | 5.35E-03 | Gm43825       | antisense | 2.30 | 3.19 | 2.74 | 2.69 | 2.00 | 2.24   | 2.00 | 2.00 |
| Down | ENSMUSG00000090003 | -3.83 | 5.39E-03 | Gm15882       | antisense | 3.61 | 3.88 | 3.16 | 3.45 | 2.00 | 2.62   | 2.00 | 2.00 |
| Down | ENSMUSG0000011878  | -1.90 | 5.41E-03 | 8430432I02Rik | antisense | 3.02 | 2.43 | 3.16 | 3.16 | 2.13 | 2.62   | 2.13 | 2.44 |
| Down | ENSMUSG00000038491 | 1.01  | 5.41E-03 | Cdk19os       | antisense | 4.65 | 4.44 | 4.44 | 4.69 | 3.82 | 3.40   | 3.97 | 3.74 |
| Down | ENSMUSG00000073843 | -2.16 | 5.44E-03 | Gm12542       | antisense | 3.10 | 3.03 | 2.54 | 3.01 | 2.00 | 2.78   | 2.00 | 2.12 |
| Down | ENSMUSG00000085538 | -4.15 | 5.46E-03 | Gm11455       | antisense | 2.65 | 2.43 | 2.29 | 2.86 | 2.00 | 2.00   | 2.00 | 2.12 |
| Down | ENSMUSG00000112828 | -1.79 | 5.55E-03 | Gm48495       | antisense | 3.31 | 3.26 | 3.49 | 3.01 | 2.12 | 3.21   | 3.24 | 2.12 |
| Down | ENSMUSG00000090200 | -3.67 | 5.70E-03 | 1700025N21Rik | antisense | 2.85 | 2.95 | 2.00 | 2.69 | 2.00 | 2.00   | 2.00 | 2.24 |
| Down | ENSMUSG00000100053 | -2.29 | 5.77E-03 | Gm28154       | antisense | 3.44 | 4.17 | 3.60 | 3.82 | 2.92 | 2.63   | 2.63 | 2.44 |
| Down | ENSMUSG00000089889 | -1.59 | 5.81E-03 | 0610040B10Rik | antisense | 3.95 | 3.88 | 4.27 | 4.05 | 3.55 | 2.53   | 2.13 | 3.44 |
| Down | ENSMUSG00000093502 | -2.89 | 5.89E-03 | Gm20700       | antisense | 2.75 | 3.11 | 3.09 | 3.45 | 2.00 | 2.34   | 2.00 | 2.44 |
| Down | ENSMUSG00000085383 | -2.49 | 5.91E-03 | Gm14218       | antisense | 2.75 | 2.95 | 3.23 | 2.69 | 2.00 | 2.44   | 2.00 | 2.34 |
| Down | ENSMUSG00000105820 | -5.33 | 5.96E-03 | Gm43400       | antisense | 2.43 | 3.26 | 2.74 | 2.38 | 2.00 | 2.00   | 2.00 | 2.00 |
| Down | ENSMUSG00000084834 | -1.33 | 5.98E-03 | 4930565N06Rik | antisense | 3.44 | 3.52 | 2.93 | 3.86 | 2.57 | 2.24   | 3.24 | 2.85 |
| Down | ENSMUSG00000107902 | -2.07 | 5.99E-03 | Gm32592       | antisense | 3.02 | 3.11 | 3.49 | 3.65 | 2.00 | 2.70   | 2.00 | 2.54 |
| Down | ENSMUSG00000107353 | -3.78 | 6.03E-03 | 4930430D22Rik | antisense | 3.02 | 2.43 | 2.43 | 3.01 | 2.00 | 2.00</ |      |      |

|      |                     |       |            |               |                               |       |       |       |       |       |       |       |       |
|------|---------------------|-------|------------|---------------|-------------------------------|-------|-------|-------|-------|-------|-------|-------|-------|
| Down | ENSMUSG00000087120  | -2.10 | 6.47E-03   | Gm12279       | antisense                     | 3.10  | 3.57  | 2.84  | 3.15  | 2.47  | 2.00  | 2.00  | 2.85  |
| Down | ENSMUSG00000114050  | -3.71 | 6.50E-03   | Gm47666       | antisense                     | 2.75  | 2.43  | 2.29  | 2.27  | 2.00  | 2.00  | 2.00  | 2.12  |
| Down | ENSMUSG00000099994  | -4.68 | 6.52E-03   | 1700024B18Rik | antisense                     | 2.30  | 2.43  | 2.29  | 2.29  | 2.94  | 2.00  | 2.00  | 2.00  |
| Down | ENSMUSG000000099760 | -1.01 | 6.53E-03   | Gm28800       | antisense                     | 4.62  | 4.53  | 4.73  | 4.80  | 4.03  | 4.16  | 3.79  | 3.44  |
| Down | ENSMUSG000000099632 | -2.03 | 6.61E-03   | 290009K320Rik | antisense                     | 3.81  | 3.68  | 3.30  | 3.39  | 2.13  | 2.44  | 3.24  | 2.44  |
| Down | ENSMUSG000000028612 | -3.76 | 6.62E-03   | Lrp8os1       | antisense                     | 3.10  | 2.76  | 2.64  | 2.14  | 2.00  | 2.00  | 2.00  | 2.24  |
| Down | ENSMUSG000000086156 | -1.85 | 6.77E-03   | Gm15338       | antisense                     | 3.38  | 3.39  | 3.09  | 3.15  | 2.00  | 2.00  | 2.00  | 2.32  |
| Down | ENSMUSG000000098127 | -3.04 | 6.91E-03   | Gm4665        | antisense                     | 3.10  | 2.43  | 2.84  | 2.77  | 2.00  | 2.00  | 2.00  | 2.44  |
| Down | ENSMUSG000000085135 | -1.05 | 6.98E-03   | Gm13713       | antisense                     | 4.42  | 4.82  | 4.78  | 4.28  | 4.03  | 3.73  | 2.93  | 4.14  |
| Down | ENSMUSG000000086462 | -5.82 | 7.05E-03   | Gm13990       | antisense                     | 3.02  | 2.86  | 2.42  | 3.39  | 2.00  | 2.00  | 2.00  | 2.00  |
| Down | ENSMUSG00000102114  | -2.28 | 7.05E-03   | BC048559      | antisense                     | 2.75  | 3.39  | 2.74  | 3.50  | 2.00  | 2.24  | 2.00  | 2.85  |
| Down | ENSMUSG00000104829  | -4.08 | 7.15E-03   | Gm43685       | antisense                     | 2.30  | 2.86  | 2.29  | 2.69  | 2.13  | 2.00  | 2.00  | 2.00  |
| Down | ENSMUSG00000091283  | -4.19 | 7.21E-03   | Gm17234       | antisense                     | 2.16  | 2.43  | 2.64  | 2.27  | 2.00  | 2.00  | 2.00  | 2.00  |
| Down | ENSMUSG00000085189  | -4.42 | 7.27E-03   | Gm11963       | antisense                     | 2.30  | 2.30  | 2.84  | 3.08  | 2.00  | 2.00  | 2.00  | 2.12  |
| Down | ENSMUSG00000113104  | -2.26 | 7.43E-03   | Gm47806       | antisense                     | 2.30  | 3.26  | 3.89  | 2.94  | 2.00  | 2.12  | 2.93  | 2.12  |
| Down | ENSMUSG000000086417 | -4.54 | 7.49E-03   | Gm12996       | antisense                     | 2.43  | 2.76  | 2.15  | 3.27  | 2.00  | 2.12  | 2.00  | 2.12  |
| Down | ENSMUSG00000116665  | -2.24 | 7.53E-03   | E130310I04Rik | antisense                     | 3.10  | 2.66  | 3.60  | 3.86  | 2.00  | 2.62  | 2.00  | 2.85  |
| Down | ENSMUSG000000086569 | -2.50 | 7.64E-03   | Rab11fp4os2   | antisense                     | 2.00  | 3.11  | 2.00  | 2.84  | 3.08  | 2.53  | 2.00  | 2.00  |
| Down | ENSMUSG000000089647 | -1.28 | 7.65E-03   | Gm2245        | antisense                     | 4.45  | 3.97  | 4.43  | 4.12  | 3.50  | 3.69  | 2.54  | 3.44  |
| Down | ENSMUSG000000059532 | -4.25 | 7.69E-03   | Gm15556       | antisense                     | 2.00  | 2.16  | 2.29  | 2.94  | 2.00  | 2.00  | 2.00  | 2.00  |
| Down | ENSMUSG000000737729 | -1.97 | 7.69E-03   | Tmem51os1     | antisense                     | 3.81  | 3.39  | 3.30  | 3.55  | 3.07  | 3.12  | 3.07  | 2.12  |
| Down | ENSMUSG00000111189  | -2.50 | 7.80E-03   | Gm48293       | antisense                     | 3.10  | 2.95  | 2.29  | 2.38  | 2.00  | 2.12  | 2.00  | 2.44  |
| Down | ENSMUSG000000086675 | -1.07 | 7.90E-03   | Pknox4os2     | antisense                     | 3.67  | 4.34  | 4.17  | 4.22  | 4.03  | 3.47  | 2.86  | 2.78  |
| Down | ENSMUSG00000097840  | -1.85 | 7.94E-03   | Gm26756       | antisense                     | 3.72  | 3.46  | 3.84  | 3.15  | 2.00  | 2.53  | 2.71  | 3.06  |
| Down | ENSMUSG00000085499  | -1.55 | 7.95E-03   | Gm15713       | antisense                     | 3.10  | 3.11  | 3.30  | 3.21  | 2.47  | 2.44  | 2.93  | 2.12  |
| Down | ENSMUSG00000102845  | -4.67 | 8.04E-03   | Gm38033       | antisense                     | 2.16  | 2.30  | 2.54  | 2.94  | 2.00  | 2.00  | 2.00  | 2.00  |
| Down | ENSMUSG00000108950  | -2.98 | 8.15E-03   | 9130015G15Rik | antisense                     | 2.94  | 2.66  | 2.54  | 2.94  | 2.00  | 2.00  | 2.00  | 2.44  |
| Down | ENSMUSG00000101636  | -4.55 | 8.21E-03   | 4930579H20Rik | antisense                     | 2.75  | 3.26  | 2.64  | 3.39  | 2.00  | 2.00  | 2.24  | 2.24  |
| Down | ENSMUSG00000054909  | -2.55 | 8.27E-03   | Wbscr25       | antisense                     | 2.85  | 3.46  | 3.60  | 3.78  | 2.00  | 2.62  | 2.00  | 2.00  |
| Down | ENSMUSG000000086125 | -2.99 | 8.28E-03   | Gm15942       | antisense                     | 2.54  | 2.76  | 2.15  | 2.94  | 2.37  | 2.00  | 2.00  | 2.00  |
| Down | ENSMUSG000000086438 | -5.47 | 8.32E-03   | Asb17os       | antisense                     | 2.75  | 2.55  | 3.01  | 2.86  | 2.00  | 2.00  | 2.00  | 2.00  |
| Down | ENSMUSG00000113100  | -2.13 | 8.45E-03   | Gm48754       | antisense                     | 2.54  | 2.95  | 2.64  | 3.15  | 2.00  | 2.00  | 2.00  | 2.78  |
| Down | ENSMUSG000000059514 | -1.48 | 8.49E-03   | Atad3aos      | antisense                     | 3.44  | 4.20  | 3.60  | 3.57  | 3.00  | 3.57  | 3.38  | 3.12  |
| Down | ENSMUSG00000101242  | -2.46 | 8.49E-03   | Gm28319       | antisense                     | 2.30  | 2.56  | 2.00  | 2.38  | 2.00  | 2.00  | 2.00  | 2.00  |
| Down | ENSMUSG000000085847 | -1.59 | 8.66E-03   | Gm14540       | antisense                     | 4.22  | 3.63  | 3.75  | 3.65  | 3.45  | 3.33  | 2.00  | 2.24  |
| Down | ENSMUSG000000087564 | -2.03 | 8.69E-03   | Gm11817       | antisense                     | 3.44  | 2.43  | 3.60  | 2.77  | 2.00  | 2.85  | 2.00  | 2.44  |
| Down | ENSMUSG00000029331  | -3.51 | 8.75E-03   | 4930522N08Rik | antisense                     | 2.65  | 2.30  | 2.64  | 2.77  | 2.00  | 2.00  | 2.00  | 2.24  |
| Down | ENSMUSG000000087698 | -1.24 | 9.16E-03   | Gm13031       | antisense                     | 5.54  | 5.25  | 5.02  | 4.89  | 4.25  | 3.38  | 3.90  | 4.74  |
| Down | ENSMUSG000000085284 | -2.85 | 9.20E-03   | Gm16189       | antisense                     | 2.85  | 2.43  | 2.64  | 2.94  | 2.00  | 2.00  | 2.35  | 2.12  |
| Down | ENSMUSG000000085118 | -1.04 | 9.53E-03   | Gm15774       | antisense                     | 5.12  | 4.41  | 4.37  | 4.53  | 3.50  | 3.43  | 4.61  | 3.34  |
| Down | ENSMUSG00000090002  | -3.22 | 9.65E-03   | Gm16006       | antisense                     | 2.65  | 2.16  | 3.16  | 2.69  | 2.00  | 2.24  | 2.00  | 2.12  |
| Up   | ENSMUSG000000092418 | 1.13  | 9.73E-03   | Gm20406       | antisense                     | 3.44  | 3.88  | 3.70  | 3.98  | 4.70  | 4.07  | 5.26  | 4.23  |
| Down | ENSMUSG000000087258 | -3.69 | 9.73E-03   | Gm15461       | antisense                     | 2.16  | 2.43  | 2.64  | 2.49  | 2.00  | 2.00  | 2.12  | 2.12  |
| Up   | ENSMUSG000000086838 | 1.57  | 9.74E-03   | Gm16212       | antisense                     | 2.85  | 3.11  | 2.54  | 3.33  | 3.17  | 3.80  | 4.50  | 4.11  |
| Down | ENSMUSG00000106093  | -1.97 | 9.81E-03   | Gm42722       | antisense                     | 2.75  | 4.01  | 3.23  | 3.00  | 2.24  | 3.07  | 2.54  | 2.44  |
| Down | ENSMUSG00000111256  | -2.87 | 9.84E-03   | Gm48094       | antisense                     | 3.50  | 2.95  | 2.74  | 3.15  | 2.13  | 2.24  | 2.00  | 2.44  |
| Up   | ENSMUSG000000052447 | 1.41  | 2.31E-23   | Gm9539        | bidirectional_promoter_lncRNA | 5.75  | 5.35  | 5.60  | 5.69  | 7.11  | 6.69  | 6.62  | 6.08  |
| Up   | ENSMUSG00000112627  | -2.98 | 2.38E-20   | 4933412E12Rik | bidirectional_promoter_lncRNA | 5.81  | 5.30  | 5.26  | 5.14  | 3.29  | 3.22  | 2.71  | 3.29  |
| Up   | ENSMUSG000000097445 | 1.16  | 2.09E-18   | Gm26631       | bidirectional_promoter_lncRNA | 6.73  | 6.84  | 7.05  | 6.95  | 8.04  | 8.73  | 7.89  | 8.99  |
| Down | ENSMUSG00000074235  | -1.70 | 6.22E-11   | Gm10649       | bidirectional_promoter_lncRNA | 6.57  | 6.10  | 6.61  | 6.08  | 3.96  | 5.04  | 4.69  | 5.25  |
| Down | ENSMUSG00000097157  | -2.69 | 7.45E-10   | Gm26512       | directional_promoter_lncRNA   | 5.02  | 4.91  | 4.49  | 5.31  | 2.47  | 3.83  | 3.06  | 3.69  |
| Up   | ENSMUSG000000086448 | 1.13  | 5.09E-07   | 9330162012Rik | bidirectional_promoter_lncRNA | 5.36  | 5.40  | 5.29  | 5.57  | 5.81  | 6.76  | 6.59  | 6.54  |
| Down | ENSMUSG00000097162  | -2.04 | 5.78E-07   | 2310010J17Rik | bidirectional_promoter_lncRNA | 4.70  | 4.58  | 4.87  | 4.53  | 3.35  | 2.62  | 3.40  | 3.34  |
| Down | ENSMUSG00000100017  | -1.52 | 2.04E-06   | 2410022M11Rik | bidirectional_promoter_lncRNA | 4.70  | 4.86  | 5.02  | 4.91  | 3.50  | 3.61  | 3.35  | 4.14  |
| Down | ENSMUSG00000112641  | -4.86 | 6.57E-06   | Gm40709       | bidirectional_promoter_lncRNA | 3.91  | 3.83  | 3.16  | 2.00  | 3.24  | 2.00  | 2.00  | 2.00  |
| Down | ENSMUSG00000097007  | -2.05 | 1.87E-05   | 4930432B10Rik | bidirectional_promoter_lncRNA | 3.99  | 4.72  | 4.20  | 3.86  | 2.82  | 2.53  | 2.93  | 3.29  |
| Down | ENSMUSG00000112346  | -1.64 | 2.01E-05   | Gm48768       | bidirectional_promoter_lncRNA | 4.70  | 4.93  | 4.68  | 4.70  | 3.52  | 3.40  | 3.82  | 4.91  |
| Up   | ENSMUSG00000097286  | -1.45 | 2.27E-05   | Gm26684       | bidirectional_promoter_lncRNA | 5.60  | 5.15  | 4.97  | 5.42  | 3.89  | 3.28  | 4.30  | 4.59  |
| Up   | ENSMUSG000000097541 | 1.96  | 2.91E-05   | Gm26902       | bidirectional_promoter_lncRNA | 3.99  | 4.74  | 4.13  | 4.09  | 5.72  | 5.98  | 6.59  | 5.38  |
| Down | ENSMUSG00000097590  | -6.40 | 9.76E-05   | Gm5432        | bidirectional_promoter_lncRNA | 3.25  | 2.86  | 3.43  | 3.50  | 2.00  | 2.00  | 2.00  | 2.00  |
| Down | ENSMUSG00000074024  | -1.67 | 1.72E-04   | 4632427E13Rik | bidirectional_promoter_lncRNA | 4.65  | 4.67  | 4.87  | 4.70  | 3.64  | 3.80  | 2.00  | 2.00  |
| Down | ENSMUSG00000115810  | -1.56 | 2.24E-04   | Gm49066       | bidirectional_promoter_lncRNA | 3.56  | 3.73  | 3.60  | 4.22  | 3.04  | 2.92  | 2.79  | 2.78  |
| Down | ENSMUSG00000074357  | -1.62 | 8.31E-04   | AA386476      | bidirectional_promoter_lncRNA | 3.95  | 3.78  | 3.75  | 4.28  | 2.97  | 3.17  | 3.13  | 2.44  |
| Down | ENSMUSG00000097835  | -1.02 | 1.86E-03   | Gm26910       | directional_promoter_lncRNA   | 3.95  | 4.84  | 5.02  | 4.55  | 3.11  | 4.13  | 4.10  | 3.81  |
| Down | ENSMUSG00000097699  | -2.05 | 2.01E-03   | 5430400D12Rik | bidirectional_promoter_lncRNA | 2.94  | 3.97  | 4.13  | 3.90  | 3.04  | 2.00  | 2.45  | 2.99  |
| Down | ENSMUSG00000112347  | -3.69 | 2.64E-03   | Gm47257       | bidirectional_promoter_lncRNA | 2.94  | 2.66  | 3.09  | 2.94  | 2.00  | 2.00  | 2.00  | 2.34  |
| Down | ENSMUSG00000092536  | -1.35 | 5.17E-03   | Gm20501       | bidirectional_promoter_lncRNA | 4.29  | 3.68  | 4.46  | 4.34  | 3.50  | 3.77  | 2.35  | 3.57  |
| Down | ENSMUSG00000114099  | -2.77 | 7.14E-03   | Gm48695       | bidirectional_promoter_lncRNA | 3.56  | 3.19  | 2.93  | 3.86  | 2.00  | 2.62  | 2.00  | 2.14  |
| Down | ENSMUSG00000085945  | -2.54 | 7.20E-03   | 2310014F06Rik | bidirectional_promoter_lncRNA | 3.56  | 3.19  | 3.54  | 3.45  | 2.13  | 2.00  | 2.00  | 3.06  |
| Down | ENSMUSG00000097223  | -2.04 | 7.72E-03   | Gm2449        | bidirectional_promoter_lncRNA | 3.31  | 2.43  | 3.54  | 3.08  | 2.34  | 2.24  | 2.00  | 2.00  |
| Down | ENSMUSG00000074052  | -2.86 | 7.74E-03   | BC048644      | bidirectional_promoter_lncRNA | 3.31  | 3.63  | 3.75  | 3.21  | 2.25  | 2.24  | 2.00  | 2.70  |
| Down | ENSMUSG000000092341 | -4.37 | 7.98E-218  | Malat1        | lincRNA                       | 16.94 | 16.64 | 16.46 | 16.90 | 12.53 | 12.14 | 12.24 | 12.56 |
| Down | ENSMUSG000000097545 | -2.75 | 1.73E-159  | Mir124a-1hg   | lincRNA                       | 8.74  | 8.87  | 9.21  | 9.05  | 6.87  | 6.21  | 6.33  | 6.27  |
| Down | ENSMUSG00000115783  | -1.67 | 6.71E-136  | Bc1           | lincRNA                       | 14.81 | 14.70 | 14.38 | 14.95 | 7.20  | 7.23  | 7.84  | 7.84  |
| Down | ENSMUSG00000102869  | -1.67 | 3.84E-107  | 2900097C17Rik | lincRNA                       | 13.55 | 13.64 | 13.67 | 13.67 | 12.04 | 11.98 | 11.98 | 11.95 |
| Down | ENSMUSG00000099696  | -3.93 | 1.67E-98   | 2900052N01Rik | lincRNA                       | 8.72  | 8.91  | 8.56  | 8.61  | 4.13  | 5.45  | 4.75  | 5.17  |
| Down | ENSMUSG00000087038  | -2.29 | 1.95E-81   | 2900079G21Rik | lincRNA                       | 7.51  | 7.46  | 7.35  | 7.40  | 5.23  | 5.13  | 5.71  | 4.85  |
| Down | ENSMUSG00000021268  | -2.35 | 2.69E-80   | Meg3          | lincRNA                       | 12.11 | 12.43 | 12.84 | 12.62 | 9.95  | 10.23 | 10.22 | 10.30 |
| Down | ENSMUSG00000092274  | -2.37 | 5.65E-70   | Neat1         | lincRNA                       | 8.66  | 8.68  | 8.69  | 8.55  | 6.56  | 6.40  | 6.50  | 5.75  |
| Down | ENSMUSG00000097736  | -2.95 | 1.50E-66   | 9530059O14Rik | lincRNA                       | 6.68  | 7.23  | 7.34  | 7.23  | 4.31  | 3.87  | 4.63  | 4.81  |
| Down | ENSMUSG00000112117  | -3.29 | 2.17E-59   | Rmst          | lincRNA                       | 7.42  | 7.45  | 7.33  | 7.40  | 4.86  | 4.37  | 3.40  | 4.53  |
| Down | ENSMUSG00000098097  | -3.94 | 2.44E-50   | 6530403H02Rik | lincRNA                       | 6.63  | 6.48  | 6.35  | 6.86  | 3.40  | 3.56  | 3.13  | 3.17  |
| Up   | ENSMUSG00000100113  | 1.86  | 1.18E-46   | Gm28592       | lincRNA                       | 6.84  | 6.60  | 6.56  | 6.84  | 8.30  | 8.82  | 8.44  | 8.52  |
| Down | ENSMUSG000000029878 | -1.59 | 1.05E-39   | Dbpht2        | lincRNA                       | 9.67  | 9.85  | 9.58  | 10.01 | 7.76  | 8.31  | 8.18  | 8.48  |
| Down | ENSMUSG00000097986  | -2.02 | 1.21E-37</ |               |                               |       |       |       |       |       |       |       |       |

|      |                    |       |          |               |         |      |      |       |      |      |      |      |        |
|------|--------------------|-------|----------|---------------|---------|------|------|-------|------|------|------|------|--------|
| Down | ENSMUSG00000097452 | -2.56 | 4.89E-32 | Gm2824        | lincRNA | 5.96 | 6.75 | 6.61  | 6.31 | 4.16 | 4.35 | 3.83 | 4.31   |
| Down | ENSMUSG00000100252 | -1.40 | 8.42E-31 | Mir124-2hg    | lincRNA | 7.97 | 8.06 | 8.12  | 8.16 | 6.77 | 6.75 | 6.75 | 6.58   |
| Down | ENSMUSG00000022639 | -1.83 | 3.44E-29 | Dubr          | lincRNA | 7.31 | 7.15 | 7.05  | 7.25 | 5.58 | 5.18 | 5.29 | 5.71   |
| Down | ENSMUSG00000098202 | -2.33 | 9.60E-29 | B830012L14Rik | lincRNA | 5.29 | 5.26 | 5.64  | 5.94 | 3.64 | 3.38 | 3.75 | 3.81   |
| Down | ENSMUSG00000102336 | -2.65 | 1.04E-28 | Gm37233       | lincRNA | 6.75 | 6.53 | 6.70  | 6.49 | 4.19 | 3.33 | 4.19 | 4.88   |
| Down | ENSMUSG00000097683 | -3.60 | 8.37E-28 | Gm26644       | lincRNA | 6.66 | 5.96 | 6.81  | 6.30 | 3.64 | 3.69 | 3.00 | 3.39   |
| Down | ENSMUSG00000097156 | -3.78 | 1.51E-27 | Gm37634       | lincRNA | 6.80 | 6.73 | 6.73  | 6.24 | 5.43 | 5.40 | 5.43 | 5.42   |
| Down | ENSMUSG00000097767 | -2.10 | 5.39E-27 | Miat          | lincRNA | 9.55 | 9.90 | 10.35 | 9.88 | 7.33 | 6.15 | 7.95 | 7.93   |
| Down | ENSMUSG00000090086 | -2.36 | 9.79E-26 | AI480526      | lincRNA | 5.75 | 5.46 | 5.82  | 5.63 | 3.60 | 3.05 | 4.27 | 3.70   |
| Down | ENSMUSG00000103983 | -3.80 | 6.03E-25 | Gm20045       | lincRNA | 5.66 | 6.05 | 5.92  | 5.97 | 3.11 | 3.28 | 2.00 | 3.29   |
| Down | ENSMUSG00000068151 | -1.48 | 3.11E-23 | A230006K03Rik | lincRNA | 8.10 | 8.11 | 8.08  | 8.15 | 7.06 | 6.45 | 6.22 | 6.82   |
| Down | ENSMUSG00000104566 | -2.47 | 3.91E-23 | 4921539H07Rik | lincRNA | 6.65 | 6.59 | 6.69  | 5.75 | 4.03 | 4.35 | 4.47 | 4.08   |
| Down | ENSMUSG00000052479 | -2.04 | 5.17E-23 | A330008L17Rik | lincRNA | 5.94 | 5.97 | 6.41  | 6.29 | 4.80 | 4.27 | 4.13 | 4.14   |
| Down | ENSMUSG00000106019 | -3.29 | 7.43E-23 | Gm43672       | lincRNA | 5.68 | 5.31 | 5.24  | 5.33 | 2.00 | 2.98 | 2.93 | 3.57   |
| Down | ENSMUSG00000097772 | -1.88 | 7.27E-22 | 5430416N02Rik | lincRNA | 6.29 | 6.17 | 6.48  | 6.62 | 4.19 | 4.60 | 4.92 | 4.92   |
| Down | ENSMUSG00000097265 | -3.16 | 8.05E-22 | Gm26803       | lincRNA | 4.54 | 5.41 | 5.17  | 5.40 | 2.12 | 2.54 | 3.17 | 3.17   |
| Down | ENSMUSG00000086924 | -3.21 | 2.06E-21 | Gm11766       | lincRNA | 4.57 | 5.40 | 5.75  | 5.11 | 2.00 | 3.43 | 3.19 | 2.78   |
| Down | ENSMUSG00000060424 | -1.22 | 2.34E-21 | Pantr1        | lincRNA | 8.45 | 8.35 | 8.31  | 8.07 | 7.12 | 7.23 | 7.06 | 7.02   |
| Down | ENSMUSG00000044471 | -1.86 | 2.56E-21 | lincpnt1      | lincRNA | 7.23 | 7.36 | 7.31  | 7.31 | 5.22 | 5.84 | 5.92 | 4.95   |
| Down | ENSMUSG00000085389 | -3.17 | 4.70E-21 | 1700003M07Rik | lincRNA | 5.06 | 5.12 | 5.13  | 5.05 | 2.90 | 2.92 | 2.71 | 2.92   |
| Down | ENSMUSG00000086095 | -3.68 | 7.81E-21 | Gm15328       | lincRNA | 4.42 | 5.04 | 4.76  | 4.76 | 2.00 | 2.62 | 2.79 | 2.70   |
| Down | ENSMUSG00000112941 | -1.44 | 4.20E-20 | Gm48623       | lincRNA | 7.91 | 7.87 | 7.93  | 7.71 | 5.96 | 6.59 | 6.61 | 6.59   |
| Down | ENSMUSG00000110317 | -3.11 | 9.80E-20 | Gm45250       | lincRNA | 5.33 | 5.10 | 5.15  | 5.38 | 2.82 | 3.43 | 2.54 | 2.99   |
| Down | ENSMUSG00000097280 | -3.03 | 1.14E-19 | AI849053      | lincRNA | 6.78 | 6.54 | 6.51  | 6.76 | 3.60 | 4.74 | 2.79 | 4.11   |
| Down | ENSMUSG00000086290 | -1.41 | 1.24E-19 | Shhg12        | lincRNA | 7.13 | 7.01 | 6.70  | 7.06 | 5.65 | 5.59 | 5.63 | 5.72   |
| Down | ENSMUSG00000087475 | -2.51 | 4.09E-19 | 4933406I18Rik | lincRNA | 5.79 | 5.75 | 5.81  | 5.54 | 3.64 | 4.10 | 2.93 | 3.70   |
| Down | ENSMUSG00000086859 | -2.50 | 3.24E-18 | Shhg20        | lincRNA | 6.61 | 6.38 | 6.35  | 6.48 | 4.56 | 4.49 | 4.07 | 3.66   |
| Down | ENSMUSG00000074776 | -2.80 | 2.62E-17 | Gm10754       | lincRNA | 4.95 | 4.89 | 4.73  | 5.42 | 2.90 | 2.85 | 3.19 | 3.12   |
| Down | ENSMUSG00000085030 | -1.50 | 1.20E-16 | 2810455O05Rik | lincRNA | 5.64 | 5.87 | 5.64  | 6.11 | 4.68 | 4.70 | 4.45 | 4.33   |
| Up   | ENSMUSG00000072847 | 1.18  | 1.59E-16 | A530017D24Rik | lincRNA | 6.35 | 6.36 | 6.23  | 6.38 | 7.64 | 7.68 | 7.37 | 7.11   |
| Down | ENSMUSG00000113960 | -2.54 | 2.71E-16 | 4933412O06Rik | lincRNA | 5.31 | 5.25 | 5.45  | 5.71 | 3.35 | 3.67 | 2.99 | 2.99   |
| Down | ENSMUSG00000095123 | -3.74 | 2.80E-16 | Gm21781       | lincRNA | 6.10 | 6.23 | 6.53  | 6.17 | 2.82 | 2.24 | 2.93 | 4.20   |
| Down | ENSMUSG00000085443 | -1.72 | 1.32E-16 | Gm10076       | lincRNA | 7.54 | 7.39 | 7.40  | 7.63 | 5.06 | 6.06 | 5.72 | 5.72   |
| Down | ENSMUSG00000096782 | -2.99 | 4.12E-16 | E130102H24Rik | lincRNA | 4.75 | 4.79 | 4.75  | 4.76 | 2.57 | 2.92 | 2.66 | 3.12   |
| Down | ENSMUSG00000113404 | -1.35 | 4.99E-16 | Gm48622       | lincRNA | 7.51 | 7.31 | 7.53  | 7.23 | 5.49 | 6.30 | 6.03 | 6.40   |
| Down | ENSMUSG00000043903 | -1.25 | 6.16E-16 | Zfp469        | lincRNA | 6.66 | 6.25 | 6.25  | 6.17 | 5.61 | 5.21 | 5.16 | 5.60   |
| Down | ENSMUSG00000109394 | -1.48 | 1.15E-15 | A230057D06Rik | lincRNA | 6.05 | 6.30 | 6.14  | 6.50 | 5.02 | 4.24 | 5.30 | 4.87   |
| Down | ENSMUSG00000086370 | -1.97 | 1.33E-15 | Flx           | lincRNA | 7.15 | 7.46 | 7.86  | 7.57 | 4.80 | 5.42 | 5.69 | 6.29   |
| Down | ENSMUSG00000115944 | -3.36 | 1.68E-15 | AU021063      | lincRNA | 4.72 | 4.95 | 5.46  | 5.14 | 3.11 | 2.92 | 2.00 | 2.92   |
| Down | ENSMUSG00000114860 | -1.84 | 1.78E-15 | Gm49291       | lincRNA | 7.23 | 7.16 | 7.33  | 7.35 | 5.25 | 5.65 | 4.79 | 6.08   |
| Up   | ENSMUSG00000113184 | 1.20  | 5.47E-15 | Gm49654       | lincRNA | 6.49 | 6.81 | 6.39  | 6.82 | 7.79 | 7.99 | 7.93 | 7.47   |
| Down | ENSMUSG00000105387 | -3.05 | 8.60E-15 | Gm29681       | lincRNA | 5.21 | 4.82 | 5.00  | 5.09 | 2.47 | 3.19 | 3.19 | 3.12   |
| Down | ENSMUSG00000100666 | -3.06 | 2.29E-14 | 1700007F19Rik | lincRNA | 5.04 | 4.47 | 5.04  | 4.09 | 2.37 | 2.78 | 2.86 | 2.85   |
| Down | ENSMUSG00000108867 | -2.05 | 4.30E-14 | Gm44643       | lincRNA | 5.70 | 5.50 | 5.32  | 5.78 | 4.10 | 4.72 | 4.00 | 4.17   |
| Down | ENSMUSG00000105881 | -2.18 | 8.75E-14 | 4932422M17Rik | lincRNA | 5.10 | 4.77 | 4.87  | 4.65 | 3.40 | 2.98 | 3.45 | 3.12   |
| Down | ENSMUSG00000104178 | -3.22 | 1.10E-13 | Gm9916        | lincRNA | 3.81 | 4.13 | 4.49  | 4.05 | 2.00 | 2.12 | 2.63 | 2.65   |
| Down | ENSMUSG00000107636 | -2.55 | 2.04E-13 | Gm44257       | lincRNA | 5.68 | 5.04 | 5.65  | 4.76 | 3.17 | 3.77 | 2.86 | 2.86   |
| Down | ENSMUSG00000104156 | -3.16 | 3.55E-13 | Gm38102       | lincRNA | 4.36 | 4.20 | 4.49  | 4.72 | 2.47 | 2.00 | 2.79 | 2.92   |
| Down | ENSMUSG00000109125 | -1.35 | 6.02E-13 | Gm45159       | lincRNA | 5.71 | 6.52 | 6.61  | 6.44 | 4.78 | 5.14 | 5.14 | 5.31   |
| Down | ENSMUSG00000075511 | -1.52 | 1.29E-12 | 1700001L05Rik | lincRNA | 6.00 | 6.20 | 6.05  | 6.27 | 4.68 | 5.10 | 4.57 | 4.61   |
| Down | ENSMUSG00000110618 | -4.08 | 1.38E-12 | Gm39822       | lincRNA | 4.75 | 4.56 | 5.26  | 4.37 | 2.57 | 2.44 | 2.00 | 2.62   |
| Down | ENSMUSG00000105345 | -2.80 | 3.65E-12 | BC030343      | lincRNA | 5.12 | 4.86 | 5.02  | 5.27 | 3.73 | 2.12 | 2.54 | 3.29   |
| Down | ENSMUSG00000086289 | -2.17 | 3.70E-12 | Gm16933       | lincRNA | 6.21 | 6.66 | 6.77  | 6.44 | 4.82 | 3.47 | 4.88 | 4.70   |
| Down | ENSMUSG00000086308 | -3.44 | 4.95E-12 | G630016G05Rik | lincRNA | 3.81 | 4.44 | 4.46  | 4.42 | 2.00 | 2.92 | 2.35 | 2.34   |
| Down | ENSMUSG00000055125 | -1.90 | 5.06E-12 | MSC1000118Rik | lincRNA | 6.19 | 6.54 | 6.63  | 6.28 | 5.14 | 4.27 | 5.14 | 5.14   |
| Down | ENSMUSG00000107096 | -1.00 | 6.03E-12 | Gm43597       | lincRNA | 7.40 | 7.23 | 7.39  | 7.47 | 6.56 | 6.45 | 6.17 | 6.42   |
| Down | ENSMUSG00000105152 | -4.76 | 7.12E-12 | Gm42864       | lincRNA | 4.29 | 4.58 | 5.04  | 4.27 | 2.13 | 2.00 | 2.00 | 2.00   |
| Down | ENSMUSG00000098234 | -1.49 | 8.60E-12 | Shhg6         | lincRNA | 6.05 | 5.84 | 6.13  | 5.95 | 4.68 | 4.27 | 5.16 | 4.38   |
| Down | ENSMUSG00000112763 | -3.27 | 1.05E-11 | Gm34304       | lincRNA | 4.51 | 4.13 | 4.13  | 4.58 | 2.00 | 2.53 | 2.45 | 2.92   |
| Down | ENSMUSG00000097930 | -1.22 | 1.30E-11 | C330002G04Rik | lincRNA | 6.04 | 5.72 | 5.72  | 6.09 | 4.86 | 4.68 | 4.69 | 4.98   |
| Down | ENSMUSG00000111602 | -2.64 | 1.41E-11 | Gm32014       | lincRNA | 4.42 | 5.23 | 5.07  | 4.72 | 3.04 | 2.85 | 2.54 | 3.48   |
| Down | ENSMUSG00000097391 | -1.78 | 1.90E-11 | Mirg          | lincRNA | 5.04 | 5.50 | 5.22  | 5.31 | 3.77 | 3.94 | 3.50 | 4.02   |
| Up   | ENSMUSG00000098196 | 1.12  | 2.35E-11 | Gm26964       | lincRNA | 5.85 | 5.91 | 5.43  | 5.62 | 7.01 | 6.92 | 6.59 | 6.51   |
| Down | ENSMUSG00000098051 | -2.16 | 3.66E-11 | Gm27032       | lincRNA | 4.84 | 4.95 | 4.89  | 4.65 | 3.29 | 3.17 | 2.71 | 3.66   |
| Down | ENSMUSG00000108546 | -1.17 | 4.21E-11 | Gm44662       | lincRNA | 6.33 | 6.20 | 6.39  | 6.15 | 5.36 | 4.89 | 5.30 | 5.20   |
| Down | ENSMUSG00000052848 | -1.94 | 6.13E-11 | C130026L21Rik | lincRNA | 5.17 | 4.93 | 5.57  | 5.31 | 3.91 | 3.91 | 4.00 | 3.92   |
| Down | ENSMUSG00000054135 | -3.42 | 8.33E-11 | A430110L20Rik | lincRNA | 3.56 | 3.83 | 4.24  | 4.45 | 2.00 | 2.62 | 2.54 | 2.24   |
| Down | ENSMUSG00000105352 | -2.71 | 8.64E-11 | C030018K13Rik | lincRNA | 4.93 | 4.97 | 4.93  | 5.02 | 2.63 | 2.86 | 3.17 | 3.07   |
| Down | ENSMUSG00000097393 | -2.39 | 9.23E-11 | D030068K23Rik | lincRNA | 5.82 | 5.23 | 5.29  | 5.16 | 2.57 | 2.85 | 3.63 | 4.28   |
| Down | ENSMUSG00000115569 | -3.37 | 9.62E-11 | Gm49169       | lincRNA | 5.08 | 5.36 | 4.87  | 5.31 | 2.00 | 2.44 | 3.61 | 4.28   |
| Down | ENSMUSG00000051008 | -4.31 | 9.71E-11 | 4930412M03Rik | lincRNA | 3.50 | 3.52 | 4.49  | 3.82 | 2.00 | 2.00 | 2.35 | 2.34   |
| Down | ENSMUSG00000111160 | -3.30 | 3.04E-10 | Gm48855       | lincRNA | 3.18 | 3.73 | 4.13  | 4.25 | 2.25 | 2.24 | 2.24 | 2.62   |
| Down | ENSMUSG00000097981 | -2.60 | 4.67E-10 | Caln          | lincRNA | 4.18 | 5.10 | 4.54  | 4.54 | 2.74 | 2.74 | 2.63 | 3.92   |
| Down | ENSMUSG00000073478 | -2.73 | 7.58E-10 | D730003I15Rik | lincRNA | 4.11 | 4.45 | 4.40  | 4.19 | 2.25 | 2.44 | 3.07 | 3.17   |
| Down | ENSMUSG00000107726 | -3.32 | 1.25E-09 | Gm44037       | lincRNA | 4.07 | 4.37 | 4.49  | 4.45 | 2.82 | 2.53 | 2.00 | 2.54   |
| Down | ENSMUSG00000055972 | -3.54 | 2.08E-09 | 2810407A14Rik | lincRNA | 3.95 | 4.31 | 4.80  | 4.91 | 2.66 | 2.00 | 2.71 | 2.54   |
| Down | ENSMUSG00000116965 | -4.95 | 3.05E-09 | Gm36742       | lincRNA | 4.67 | 4.53 | 4.05  | 4.22 | 2.12 | 2.00 | 2.34 | 2.34   |
| Down | ENSMUSG00000086602 | -1.19 | 3.09E-09 | Gm15609       | lincRNA | 6.35 | 5.88 | 6.31  | 5.96 | 4.76 | 5.27 | 4.95 | 5.17   |
| Down | ENSMUSG00000098041 | -2.38 | 4.73E-09 | Gm26981       | lincRNA | 4.15 | 3.97 | 3.97  | 3.65 | 2.00 | 2.92 | 2.45 | 2.92   |
| Down | ENSMUSG00000105218 | -2.71 | 5.06E-09 | Gm38413       | lincRNA | 3.91 | 4.56 | 4.52  | 4.28 | 3.04 | 2.85 | 2.00 | 2.70   |
| Down | ENSMUSG00000111854 | -4.33 | 9.36E-09 | Gm48740       | lincRNA | 3.02 | 4.34 | 3.36  | 3.82 | 2.13 | 2.00 | 2.00 | 2.44   |
| Down | ENSMUSG00000097415 | -3.12 | 1.10E-08 | AU020206      | lincRNA | 5.10 | 4.37 | 3.84  | 4.34 | 2.66 | 2.70 | 2.63 | 2.44   |
| Down | ENSMUSG00000087259 | -1.04 | 1.55E-08 | 2610035D17Rik | lincRNA | 6.26 | 6.05 | 6.42  | 6.52 | 5.37 | 4.92 | 5.06 | 5.06   |
| Down | ENSMUSG00000111947 | -4.23 | 1.81E-08 | Gm47438       | lincRNA | 3.77 | 3.26 | 3.17  | 3.98 | 2.00 | 2.24 | 2.00 | 2.44   |
| Down | ENSMUSG00000090965 | -3.42 | 1.92E-08 | Gm17203       | lincRNA | 3.72 | 4.37 | 3.09  | 4.05 | 2.00 | 2.00 | 2.00 | 2.85</ |

|      |                     |       |          |               |         |      |      |      |      |      |      |      |      |
|------|---------------------|-------|----------|---------------|---------|------|------|------|------|------|------|------|------|
| Up   | ENSMUSG00000097974  | 1.24  | 7.37E-08 | Gm10605       | lincRNA | 5.31 | 5.10 | 5.69 | 5.40 | 6.43 | 6.28 | 6.54 | 6.87 |
| Down | ENSMUSG00000097571  | -1.24 | 1.10E-07 | Jpx           | lincRNA | 5.44 | 6.02 | 6.53 | 6.16 | 4.84 | 4.70 | 4.71 | 5.43 |
| Down | ENSMUSG00000037735  | -1.05 | 1.37E-07 | 2810032G03Rik | lincRNA | 6.06 | 6.33 | 6.17 | 5.86 | 5.33 | 4.76 | 5.41 | 5.02 |
| Down | ENSMUSG000000107859 | -4.50 | 1.60E-07 | Gm30731       | lincRNA | 3.25 | 3.57 | 3.54 | 3.98 | 2.00 | 2.00 | 2.00 | 2.24 |
| Down | ENSMUSG000000097591 | -4.27 | 1.78E-07 | 4632411P08Rik | lincRNA | 3.61 | 3.57 | 4.09 | 4.12 | 2.00 | 2.00 | 2.00 | 2.24 |
| Down | ENSMUSG000000113429 | -3.14 | 1.82E-07 | Gm20063       | lincRNA | 4.62 | 4.37 | 4.73 | 4.15 | 2.00 | 2.12 | 2.13 | 3.53 |
| Down | ENSMUSG000000114689 | -3.41 | 2.31E-07 | 3110006G03Rik | lincRNA | 3.21 | 4.01 | 4.17 | 2.00 | 2.00 | 2.12 | 2.00 | 2.85 |
| Down | ENSMUSG000000097536 | -2.36 | 2.46E-07 | 2610037D02Rik | lincRNA | 5.73 | 5.71 | 6.00 | 6.12 | 3.45 | 2.00 | 4.70 | 4.10 |
| Down | ENSMUSG000000115933 | -3.57 | 2.96E-07 | Gm48742       | lincRNA | 3.18 | 3.52 | 3.16 | 3.65 | 2.00 | 2.00 | 2.00 | 2.62 |
| Down | ENSMUSG000000108095 | -5.24 | 3.38E-07 | Gm44067       | lincRNA | 4.07 | 3.03 | 4.40 | 4.63 | 2.00 | 2.00 | 2.00 | 2.44 |
| Down | ENSMUSG000000097326 | -3.71 | 3.61E-07 | A330048O09Rik | lincRNA | 3.56 | 3.73 | 3.97 | 3.78 | 2.47 | 2.00 | 2.24 | 2.24 |
| Down | ENSMUSG000000099937 | -4.06 | 3.76E-07 | Gm28872       | lincRNA | 3.99 | 3.33 | 3.89 | 4.55 | 2.00 | 2.00 | 2.12 | 2.24 |
| Down | ENSMUSG000000097497 | -3.97 | 4.23E-07 | Gm26652       | lincRNA | 2.85 | 3.78 | 3.09 | 3.90 | 2.00 | 2.00 | 2.00 | 2.54 |
| Down | ENSMUSG000000113330 | -2.39 | 5.20E-07 | Gm34237       | lincRNA | 3.81 | 4.13 | 4.54 | 4.50 | 2.66 | 2.00 | 3.24 | 2.99 |
| Down | ENSMUSG000000111068 | -4.69 | 5.42E-07 | Gm35501       | lincRNA | 3.67 | 3.39 | 3.36 | 3.45 | 2.00 | 2.24 | 2.00 | 2.12 |
| Down | ENSMUSG000000045813 | -1.12 | 5.50E-07 | Gm9801        | lincRNA | 5.69 | 5.80 | 5.78 | 5.54 | 5.24 | 4.87 | 4.53 | 4.87 |
| Down | ENSMUSG000000113689 | -6.54 | 6.03E-07 | Gm29676       | lincRNA | 2.75 | 3.39 | 3.60 | 3.55 | 2.00 | 2.00 | 2.00 | 2.00 |
| Down | ENSMUSG000000097601 | -1.27 | 6.39E-07 | Gm26660       | lincRNA | 4.54 | 4.41 | 4.57 | 4.72 | 3.85 | 2.98 | 3.54 | 3.89 |
| Up   | ENSMUSG000000106261 | 1.74  | 6.60E-07 | Gm34086       | lincRNA | 4.29 | 4.37 | 4.43 | 4.78 | 6.36 | 6.27 | 5.46 | 5.86 |
| Down | ENSMUSG000000109890 | -2.71 | 7.69E-07 | AU023762      | lincRNA | 5.04 | 4.34 | 4.60 | 4.42 | 3.69 | 2.00 | 2.13 | 2.92 |
| Down | ENSMUSG000000102820 | -3.59 | 9.77E-07 | Gm38353       | lincRNA | 4.29 | 3.57 | 4.43 | 3.94 | 2.00 | 2.00 | 2.62 | 2.62 |
| Down | ENSMUSG000000097908 | -1.07 | 1.22E-06 | 4933404O12Rik | lincRNA | 6.86 | 6.73 | 6.63 | 6.93 | 5.45 | 5.57 | 5.79 | 6.18 |
| Down | ENSMUSG000000108228 | -1.62 | 1.40E-06 | 6430584L05Rik | lincRNA | 5.48 | 5.40 | 4.89 | 5.48 | 4.59 | 3.28 | 3.30 | 4.31 |
| Down | ENSMUSG000000048215 | -2.40 | 1.45E-06 | A630023P12Rik | lincRNA | 3.99 | 4.56 | 3.93 | 3.74 | 2.47 | 2.98 | 2.45 | 2.78 |
| Down | ENSMUSG000000053117 | -2.20 | 1.84E-06 | E330013P04Rik | lincRNA | 4.62 | 4.27 | 4.63 | 4.92 | 2.47 | 3.77 | 3.00 | 2.78 |
| Down | ENSMUSG000000085655 | -1.63 | 1.85E-06 | Gm15721       | lincRNA | 4.51 | 5.23 | 5.05 | 4.39 | 3.50 | 3.52 | 3.87 | 3.39 |
| Down | ENSMUSG000000085654 | -1.92 | 2.00E-06 | Gm12536       | lincRNA | 4.36 | 4.50 | 4.09 | 4.48 | 2.74 | 2.44 | 3.54 | 3.29 |
| Down | ENSMUSG000000100546 | -4.48 | 2.45E-06 | Gm29483       | lincRNA | 3.31 | 3.63 | 4.34 | 3.82 | 2.00 | 2.00 | 2.13 | 2.44 |
| Down | ENSMUSG000000087041 | -1.07 | 2.48E-06 | Gm16295       | lincRNA | 5.81 | 5.43 | 5.80 | 5.57 | 4.97 | 4.62 | 4.24 | 4.90 |
| Down | ENSMUSG000000099384 | -5.50 | 2.55E-06 | 1700110C19Rik | lincRNA | 3.56 | 3.97 | 3.54 | 3.33 | 2.00 | 2.00 | 2.00 | 2.24 |
| Down | ENSMUSG000000103115 | -3.31 | 2.66E-06 | Gm37584       | lincRNA | 3.95 | 2.86 | 3.97 | 4.12 | 2.00 | 2.00 | 2.86 | 2.24 |
| Down | ENSMUSG000000097296 | -5.94 | 2.86E-06 | Gm26532       | lincRNA | 2.85 | 2.95 | 3.49 | 2.69 | 2.00 | 2.00 | 2.00 | 2.00 |
| Down | ENSMUSG000000098027 | -2.77 | 3.69E-06 | Gm27304       | lincRNA | 3.56 | 4.01 | 3.43 | 3.54 | 2.00 | 2.00 | 2.00 | 2.00 |
| Down | ENSMUSG000000097961 | -2.43 | 3.21E-06 | Gm27000       | lincRNA | 3.44 | 3.19 | 3.36 | 3.50 | 2.47 | 2.34 | 2.45 | 2.24 |
| Down | ENSMUSG000000045746 | -3.41 | 4.26E-06 | B230317F23Rik | lincRNA | 4.11 | 3.33 | 4.01 | 3.55 | 2.47 | 2.00 | 2.45 | 2.24 |
| Down | ENSMUSG000000116802 | -1.45 | 4.26E-06 | Gm5165        | lincRNA | 5.60 | 5.71 | 5.40 | 4.42 | 4.90 | 4.00 | 3.24 | 4.46 |
| Up   | ENSMUSG000000113244 | 1.49  | 4.28E-06 | Gm31218       | lincRNA | 3.86 | 4.53 | 4.68 | 4.53 | 5.67 | 5.89 | 5.47 | 5.86 |
| Down | ENSMUSG000000097604 | -1.29 | 4.38E-06 | Gm17322       | lincRNA | 5.24 | 5.26 | 5.24 | 5.38 | 4.88 | 3.56 | 4.16 | 3.85 |
| Down | ENSMUSG000000074113 | -2.97 | 4.57E-06 | Gm10629       | lincRNA | 3.25 | 3.52 | 3.70 | 3.01 | 2.37 | 2.00 | 2.00 | 2.62 |
| Down | ENSMUSG000000109284 | -4.19 | 4.72E-06 | B230311B06Rik | lincRNA | 3.50 | 3.03 | 3.89 | 3.08 | 2.25 | 2.00 | 2.00 | 2.24 |
| Down | ENSMUSG000000097636 | -1.76 | 5.47E-06 | Mirt1         | lincRNA | 4.87 | 5.10 | 5.46 | 5.25 | 3.69 | 3.17 | 3.24 | 4.53 |
| Down | ENSMUSG000000089718 | -5.30 | 5.64E-06 | 2310075C17Rik | lincRNA | 2.43 | 2.76 | 2.74 | 2.94 | 2.00 | 2.00 | 2.00 | 2.00 |
| Down | ENSMUSG000000110362 | -6.39 | 6.17E-06 | Gm45554       | lincRNA | 3.38 | 3.26 | 4.20 | 3.90 | 2.00 | 2.00 | 2.00 | 2.12 |
| Down | ENSMUSG000000109829 | -1.93 | 6.30E-06 | Gm45605       | lincRNA | 5.00 | 4.91 | 4.13 | 5.27 | 2.90 | 4.13 | 2.71 | 3.48 |
| Down | ENSMUSG000000100417 | -1.40 | 6.56E-06 | Gm28578       | lincRNA | 3.99 | 4.89 | 5.04 | 4.87 | 3.04 | 3.87 | 3.59 | 3.95 |
| Down | ENSMUSG000000113427 | -2.70 | 6.69E-06 | Gm46378       | lincRNA | 3.31 | 3.73 | 3.80 | 4.05 | 2.00 | 2.00 | 2.86 | 2.70 |
| Down | ENSMUSG000000109898 | -2.78 | 6.89E-06 | 6330420H09Rik | lincRNA | 4.15 | 4.20 | 4.57 | 4.49 | 2.00 | 2.62 | 2.00 | 3.30 |
| Down | ENSMUSG000000100303 | -1.89 | 7.23E-06 | 2600014E21Rik | lincRNA | 4.26 | 4.58 | 5.19 | 5.07 | 3.11 | 3.61 | 3.19 | 3.62 |
| Down | ENSMUSG000000097248 | -1.48 | 7.24E-06 | Gm2694        | lincRNA | 4.57 | 4.74 | 4.34 | 4.92 | 3.69 | 3.61 | 3.83 | 2.85 |
| Down | ENSMUSG000000110605 | -1.51 | 7.34E-06 | Gm32856       | lincRNA | 5.83 | 5.64 | 5.68 | 5.75 | 4.56 | 3.33 | 4.47 | 4.87 |
| Down | ENSMUSG000000087312 | -5.17 | 7.58E-06 | Gm13833       | lincRNA | 3.18 | 2.76 | 3.43 | 2.49 | 2.13 | 2.00 | 2.00 | 2.00 |
| Down | ENSMUSG000000085059 | -4.28 | 7.88E-06 | Gm11750       | lincRNA | 2.75 | 3.26 | 3.70 | 3.01 | 2.00 | 2.00 | 2.00 | 2.34 |
| Down | ENSMUSG000000044387 | -3.70 | 8.10E-06 | 2410080I02Rik | lincRNA | 3.38 | 3.57 | 3.70 | 3.21 | 2.00 | 2.00 | 2.24 | 2.44 |
| Up   | ENSMUSG000000086441 | 1.68  | 9.27E-06 | Gm15046       | lincRNA | 3.67 | 4.31 | 3.75 | 3.60 | 4.70 | 5.81 | 4.99 | 5.17 |
| Down | ENSMUSG000000116755 | -4.37 | 9.48E-06 | 6430553K19Rik | lincRNA | 3.10 | 4.09 | 3.01 | 3.65 | 2.00 | 2.00 | 2.44 | 2.00 |
| Down | ENSMUSG000000109781 | -5.22 | 1.00E-05 | Gm45509       | lincRNA | 3.38 | 3.11 | 2.93 | 2.59 | 2.00 | 2.00 | 2.00 | 2.12 |
| Down | ENSMUSG000000097207 | -1.44 | 1.05E-05 | 6030443J06Rik | lincRNA | 5.31 | 4.95 | 4.24 | 5.07 | 4.35 | 3.50 | 4.11 | 4.11 |
| Down | ENSMUSG000000111443 | -1.48 | 1.08E-05 | Gm46123       | lincRNA | 4.82 | 5.31 | 5.32 | 5.24 | 4.34 | 2.98 | 4.59 | 3.39 |
| Down | ENSMUSG000000087574 | -1.19 | 1.09E-05 | C030037D09Rik | lincRNA | 5.81 | 5.50 | 5.98 | 6.09 | 5.22 | 4.74 | 4.24 | 4.81 |
| Down | ENSMUSG000000085456 | -3.52 | 1.26E-05 | Gm15398       | lincRNA | 3.61 | 3.26 | 3.09 | 3.45 | 2.37 | 2.24 | 2.00 | 2.12 |
| Down | ENSMUSG000000085167 | -1.83 | 1.36E-05 | Gm12063       | lincRNA | 4.67 | 4.20 | 4.37 | 4.72 | 3.43 | 3.60 | 2.54 | 2.99 |
| Down | ENSMUSG000000110737 | -2.75 | 1.37E-05 | 4930444F02Rik | lincRNA | 4.22 | 3.26 | 4.37 | 3.70 | 2.00 | 2.00 | 2.34 | 2.34 |
| Up   | ENSMUSG000000084843 | 1.99  | 1.45E-05 | B230312C02Rik | lincRNA | 3.31 | 2.55 | 3.30 | 2.94 | 3.73 | 4.42 | 4.52 | 4.75 |
| Down | ENSMUSG000000086943 | -2.58 | 1.54E-05 | 4732414G09Rik | lincRNA | 4.54 | 4.69 | 4.82 | 4.30 | 3.90 | 2.74 | 2.78 | 3.48 |
| Down | ENSMUSG000000100009 | -2.34 | 1.67E-05 | Gm7967        | lincRNA | 4.77 | 4.69 | 4.43 | 3.82 | 3.04 | 2.24 | 3.45 | 2.70 |
| Down | ENSMUSG000000075437 | -4.10 | 2.08E-05 | Gm11681       | lincRNA | 3.81 | 4.20 | 3.43 | 4.82 | 2.00 | 2.00 | 2.24 | 2.00 |
| Down | ENSMUSG000000097372 | -2.11 | 2.11E-05 | Gm26876       | lincRNA | 3.86 | 4.01 | 3.93 | 4.09 | 2.00 | 3.22 | 2.24 | 3.12 |
| Down | ENSMUSG000000114780 | -1.96 | 2.11E-05 | Al197445      | lincRNA | 4.36 | 4.47 | 4.54 | 4.85 | 2.47 | 3.17 | 2.79 | 3.89 |
| Down | ENSMUSG000000114053 | -4.00 | 2.20E-05 | Gm35330       | lincRNA | 4.39 | 4.13 | 2.93 | 4.05 | 2.13 | 2.12 | 2.35 | 2.34 |
| Down | ENSMUSG000000097516 | -5.88 | 2.28E-05 | 4930467D21Rik | lincRNA | 3.25 | 3.52 | 3.23 | 2.13 | 2.00 | 2.00 | 2.00 | 2.00 |
| Down | ENSMUSG000000110211 | -2.77 | 2.53E-05 | Gm31294       | lincRNA | 3.61 | 3.78 | 4.43 | 3.78 | 2.82 | 2.00 | 2.71 | 2.34 |
| Down | ENSMUSG000000109844 | -2.65 | 2.66E-05 | Gm31816       | lincRNA | 3.81 | 4.47 | 4.82 | 4.12 | 2.00 | 2.78 | 2.35 | 3.39 |
| Down | ENSMUSG000000085698 | -1.39 | 2.69E-05 | Gm13830       | lincRNA | 4.15 | 4.37 | 4.37 | 4.95 | 3.63 | 3.45 | 3.33 | 3.63 |
| Down | ENSMUSG000000109008 | -2.13 | 2.95E-05 | Gm44889       | lincRNA | 4.29 | 3.86 | 4.30 | 3.98 | 3.29 | 2.00 | 2.63 | 2.99 |
| Down | ENSMUSG000000097962 | -3.54 | 3.06E-05 | 1700034G24Rik | lincRNA | 3.25 | 4.05 | 3.36 | 3.27 | 2.00 | 2.00 | 2.00 | 2.44 |
| Down | ENSMUSG000000109010 | -1.92 | 3.09E-05 | Gm45027       | lincRNA | 4.80 | 4.47 | 4.65 | 4.15 | 2.47 | 3.91 | 2.86 | 3.06 |
| Down | ENSMUSG000000098145 | -4.98 | 3.24E-05 | Gm26936       | lincRNA | 2.75 | 2.66 | 2.84 | 3.27 | 2.00 | 2.00 | 2.12 | 2.00 |
| Down | ENSMUSG000000113186 | -2.98 | 3.65E-05 | A330076C08Rik | lincRNA | 4.36 | 4.34 | 4.05 | 4.09 | 2.82 | 2.00 | 2.35 | 2.85 |
| Down | ENSMUSG000000056089 | -4.39 | 3.70E-05 | Gm5468        | lincRNA | 3.50 | 3.19 | 3.70 | 2.49 | 2.00 | 2.00 | 2.13 | 2.24 |
| Down | ENSMUSG000000100891 | -2.16 | 3.76E-05 | 2810049E08Rik | lincRNA | 3.18 | 4.13 | 4.30 | 3.60 | 2.13 | 2.62 | 2.86 | 2.92 |
| Down | ENSMUSG000000087678 | -4.24 | 3.87E-05 | Gm14120       | lincRNA | 3.02 | 3.39 | 3.65 | 3.65 | 2.13 | 2.00 | 2.00 | 2.24 |
| Down | ENSMUSG000000116597 | -2.78 | 3.92E-05 | Gm536         | lincRNA | 3.86 | 4.01 | 4.17 | 4.89 | 2.00 | 2.44 | 2.35 | 3.39 |
| Down | ENSMUSG000000098045 | -5.02 | 3.96E-05 | Gm26979       | lincRNA | 2.65 | 2.55 | 3.09 | 3.27 | 2.00 | 2.00 | 2.12 | 2.00 |
| Down | ENSMUSG000000113361 | -2.15 | 3.97E-05 | B930059L03Rik | lincRNA | 4.18 | 4.41 | 4.01 | 4.42 | 3.23 | 2.53 | 2.13 | 3.39 |
| Up   | ENSMUSG000000096988 |       |          |               |         |      |      |      |      |      |      |      |      |

|      |                     |       |          |               |         |      |      |      |      |      |      |      |      |
|------|---------------------|-------|----------|---------------|---------|------|------|------|------|------|------|------|------|
| Down | ENSMUSG00000101599  | -2.42 | 4.94E-05 | Gm20342       | lincRNA | 5.98 | 5.76 | 6.14 | 6.33 | 2.00 | 4.04 | 3.87 | 4.81 |
| Down | ENSMUSG00000109733  | -2.82 | 5.08E-05 | Gm33940       | lincRNA | 3.44 | 3.33 | 4.57 | 4.31 | 2.00 | 2.34 | 2.13 | 3.23 |
| Down | ENSMUSG00000085709  | -5.59 | 5.59E-05 | Gm14211       | lincRNA | 2.65 | 2.55 | 2.00 | 2.38 | 2.00 | 2.00 | 2.00 | 2.00 |
| Down | ENSMUSG00000099061  | -2.57 | 5.61E-05 | Gm28050       | lincRNA | 4.91 | 3.73 | 4.13 | 4.02 | 2.37 | 2.00 | 3.45 | 2.62 |
| Down | ENSMUSG00000108776  | -2.50 | 5.67E-05 | Gm45169       | lincRNA | 3.77 | 3.73 | 3.54 | 3.45 | 2.30 | 2.00 | 2.40 | 2.70 |
| Down | ENSMUSG00000085496  | -5.47 | 5.84E-05 | 4930517E11Rik | lincRNA | 2.75 | 2.76 | 2.84 | 2.86 | 2.00 | 2.00 | 2.00 | 2.00 |
| Down | ENSMUSG00000097040  | -3.25 | 6.65E-05 | Gm14033       | lincRNA | 2.51 | 4.09 | 3.97 | 4.50 | 2.13 | 2.12 | 2.12 | 3.12 |
| Down | ENSMUSG00000112353  | -6.30 | 7.71E-05 | Gm40418       | lincRNA | 3.67 | 2.55 | 3.23 | 3.21 | 2.00 | 2.00 | 2.00 | 2.00 |
| Down | ENSMUSG00000021101  | -1.99 | 7.71E-05 | 4930408O17Rik | lincRNA | 3.18 | 3.68 | 3.30 | 3.60 | 2.97 | 2.00 | 2.63 | 2.34 |
| Down | ENSMUSG00000085193  | -5.80 | 7.72E-05 | Gm13322       | lincRNA | 2.30 | 3.26 | 3.09 | 3.01 | 2.00 | 2.00 | 2.00 | 2.00 |
| Down | ENSMUSG00000097997  | -2.92 | 7.85E-05 | Gm27017       | lincRNA | 3.56 | 3.03 | 2.74 | 3.15 | 2.47 | 2.00 | 2.00 | 2.34 |
| Down | ENSMUSG00000107412  | -3.05 | 8.38E-05 | Gm20383       | lincRNA | 4.77 | 4.44 | 4.93 | 4.42 | 2.97 | 2.44 | 2.00 | 3.17 |
| Down | ENSMUSG00000099722  | -1.39 | 9.13E-05 | Gm29154       | lincRNA | 4.75 | 4.61 | 4.70 | 4.74 | 3.35 | 3.73 | 3.54 | 3.85 |
| Down | ENSMUSG00000098155  | -2.74 | 9.79E-05 | Gm27022       | lincRNA | 2.94 | 3.52 | 3.54 | 3.27 | 2.00 | 2.00 | 2.54 | 2.54 |
| Down | ENSMUSG00000110235  | -1.88 | 1.03E-04 | Gm5086        | lincRNA | 3.95 | 4.41 | 3.65 | 3.50 | 2.37 | 3.05 | 2.86 | 2.85 |
| Down | ENSMUSG00000112054  | -2.04 | 1.04E-04 | Gm33680       | lincRNA | 4.32 | 4.24 | 4.20 | 4.45 | 2.74 | 2.78 | 3.54 | 2.62 |
| Down | ENSMUSG00000085084  | -1.22 | 1.04E-04 | 4930570G19Rik | lincRNA | 5.57 | 5.49 | 6.16 | 5.72 | 3.89 | 5.53 | 3.79 | 4.75 |
| Down | ENSMUSG00000106927  | -2.36 | 1.08E-04 | Gm43598       | lincRNA | 3.96 | 2.95 | 3.23 | 3.50 | 2.13 | 2.85 | 2.00 | 2.34 |
| Down | ENSMUSG00000085180  | -2.10 | 1.08E-04 | AIB38599      | lincRNA | 5.21 | 4.50 | 4.68 | 5.11 | 3.40 | 3.73 | 3.00 | 3.06 |
| Down | ENSMUSG00000109097  | -2.04 | 1.08E-04 | Gm29683       | lincRNA | 4.03 | 4.34 | 3.97 | 4.25 | 2.25 | 3.00 | 2.00 | 3.39 |
| Down | ENSMUSG00000113707  | -4.59 | 1.21E-04 | Gm10457       | lincRNA | 3.50 | 3.11 | 3.23 | 3.69 | 2.00 | 2.00 | 2.00 | 2.34 |
| Down | ENSMUSG00000112666  | -2.95 | 1.21E-04 | Gm48485       | lincRNA | 3.44 | 3.57 | 3.54 | 3.94 | 2.00 | 2.44 | 2.63 | 2.24 |
| Down | ENSMUSG00000116862  | -3.09 | 1.44E-04 | Gm49607       | lincRNA | 2.75 | 3.11 | 3.36 | 3.15 | 2.00 | 2.00 | 2.13 | 2.54 |
| Down | ENSMUSG00000113324  | -4.72 | 1.51E-04 | Gm48819       | lincRNA | 2.43 | 2.30 | 2.64 | 3.45 | 2.00 | 2.00 | 2.00 | 2.12 |
| Down | ENSMUSG00000089983  | -3.06 | 1.56E-04 | 2010320O07Rik | lincRNA | 3.10 | 3.03 | 3.16 | 3.08 | 2.00 | 2.44 | 2.00 | 2.24 |
| Down | ENSMUSG00000100255  | -3.23 | 1.62E-04 | Gm28196       | lincRNA | 3.56 | 3.46 | 2.84 | 3.33 | 2.00 | 2.34 | 2.24 | 2.24 |
| Down | ENSMUSG00000085470  | -5.01 | 1.66E-04 | 1700012C14Rik | lincRNA | 2.94 | 2.86 | 3.16 | 2.69 | 2.00 | 2.00 | 2.12 | 2.24 |
| Down | ENSMUSG00000107043  | -1.93 | 1.66E-04 | Gm42849       | lincRNA | 3.10 | 3.88 | 3.65 | 4.02 | 2.37 | 2.44 | 3.07 | 2.70 |
| Down | ENSMUSG00000107352  | -1.18 | 1.74E-04 | Gm43660       | lincRNA | 4.84 | 5.10 | 5.46 | 5.04 | 2.82 | 4.42 | 4.57 | 4.20 |
| Down | ENSMUSG00000106598  | -5.97 | 1.80E-04 | Gm43532       | lincRNA | 3.44 | 3.57 | 3.75 | 2.94 | 2.00 | 2.00 | 2.12 | 2.12 |
| Down | ENSMUSG00000107061  | -6.06 | 1.83E-04 | Gm19590       | lincRNA | 3.02 | 2.43 | 3.36 | 3.33 | 2.00 | 2.00 | 2.00 | 2.00 |
| Down | ENSMUSG00000097338  | -1.07 | 1.89E-04 | Gm2464        | lincRNA | 5.13 | 5.47 | 5.52 | 5.27 | 4.52 | 4.83 | 3.83 | 4.36 |
| Down | ENSMUSG00000114590  | -2.53 | 1.91E-04 | Gm45442       | lincRNA | 4.11 | 4.34 | 4.05 | 4.51 | 3.45 | 2.12 | 3.24 | 2.62 |
| Down | ENSMUSG00000090936  | -2.03 | 1.91E-04 | Gm17705       | lincRNA | 3.25 | 3.63 | 3.75 | 3.39 | 2.37 | 2.00 | 2.92 | 2.00 |
| Down | ENSMUSG00000113013  | -5.42 | 2.06E-04 | Gm47833       | lincRNA | 2.30 | 2.95 | 3.01 | 2.77 | 2.00 | 2.00 | 2.00 | 2.00 |
| Down | ENSMUSG00000115850  | -5.12 | 2.06E-04 | Gm48956       | lincRNA | 2.75 | 2.55 | 2.93 | 2.00 | 2.00 | 2.00 | 2.00 | 2.00 |
| Down | ENSMUSG00000097870  | -1.86 | 2.15E-04 | Gm26868       | lincRNA | 3.02 | 3.19 | 3.97 | 3.27 | 2.66 | 2.12 | 2.79 | 2.54 |
| Down | ENSMUSG00000091864  | -2.66 | 2.20E-04 | Gm17102       | lincRNA | 3.18 | 3.97 | 3.70 | 4.31 | 2.57 | 2.24 | 2.13 | 2.92 |
| Down | ENSMUSG00000109203  | -2.76 | 2.25E-04 | Gm32849       | lincRNA | 3.50 | 2.95 | 3.54 | 2.94 | 2.13 | 2.00 | 2.00 | 2.78 |
| Down | ENSMUSG00000079070  | -2.53 | 2.29E-04 | Gm3985        | lincRNA | 3.02 | 3.68 | 3.23 | 3.69 | 2.13 | 2.12 | 2.00 | 2.99 |
| Down | ENSMUSG00000111758  | -2.44 | 2.32E-04 | Gm30373       | lincRNA | 3.77 | 4.09 | 4.05 | 3.08 | 2.57 | 2.34 | 2.24 | 2.92 |
| Up   | ENSMUSG00000073000  | 2.08  | 2.38E-04 | Gm10451       | lincRNA | 2.94 | 3.19 | 3.70 | 3.33 | 4.52 | 4.47 | 5.61 | 4.55 |
| Down | ENSMUSG00000112983  | -5.84 | 2.41E-04 | Gm32939       | lincRNA | 2.85 | 2.55 | 3.43 | 2.94 | 2.00 | 2.00 | 2.00 | 2.00 |
| Down | ENSMUSG00000097402  | -4.76 | 2.47E-04 | Gm17399       | lincRNA | 3.72 | 2.95 | 3.30 | 2.38 | 2.00 | 2.00 | 2.00 | 2.24 |
| Down | ENSMUSG00000078519  | -2.44 | 2.76E-04 | 2310026L22Rik | lincRNA | 3.44 | 3.32 | 3.30 | 3.27 | 2.00 | 2.78 | 2.13 | 2.62 |
| Down | ENSMUSG00000108532  | -2.27 | 2.97E-04 | Gm32647       | lincRNA | 3.61 | 4.91 | 4.05 | 3.78 | 3.04 | 2.12 | 2.79 | 2.62 |
| Down | ENSMUSG00000114433  | -1.75 | 3.01E-04 | Gm48488       | lincRNA | 4.18 | 4.27 | 4.63 | 4.37 | 3.85 | 2.34 | 3.07 | 2.92 |
| Down | ENSMUSG00000072618  | -3.16 | 3.30E-04 | Gm10384       | lincRNA | 3.18 | 3.39 | 3.30 | 3.65 | 2.00 | 2.12 | 2.00 | 2.70 |
| Down | ENSMUSG00000114945  | -1.19 | 3.31E-04 | Gm48265       | lincRNA | 5.58 | 5.26 | 5.68 | 5.22 | 4.31 | 4.78 | 3.87 | 4.57 |
| Down | ENSMUSG00000086822  | -1.79 | 3.35E-04 | 5330413P13Rik | lincRNA | 5.61 | 4.82 | 5.13 | 5.02 | 3.29 | 3.69 | 2.54 | 4.61 |
| Down | ENSMUSG00000100354  | -2.92 | 3.50E-04 | Gm29113       | lincRNA | 3.18 | 3.63 | 3.54 | 3.78 | 2.66 | 2.00 | 2.00 | 2.54 |
| Down | ENSMUSG00000112466  | -1.75 | 3.66E-04 | Gm29674       | lincRNA | 3.81 | 4.44 | 3.65 | 4.58 | 3.04 | 3.65 | 2.54 | 2.62 |
| Down | ENSMUSG00000106515  | -1.57 | 3.92E-04 | Gm30382       | lincRNA | 4.36 | 4.13 | 3.84 | 4.31 | 2.57 | 3.69 | 2.54 | 3.34 |
| Down | ENSMUSG00000097727  | -2.56 | 4.04E-04 | F63004OK05Rik | lincRNA | 3.91 | 4.13 | 3.84 | 4.19 | 2.13 | 2.34 | 2.00 | 3.44 |
| Down | ENSMUSG00000097021  | -3.67 | 4.30E-04 | 493343G15Rik  | lincRNA | 3.25 | 2.86 | 3.01 | 3.82 | 2.44 | 2.00 | 2.12 | 2.00 |
| Down | ENSMUSG00000086328  | -1.90 | 4.37E-04 | 2700033N17Rik | lincRNA | 3.95 | 3.92 | 3.70 | 3.60 | 2.47 | 2.00 | 3.24 | 2.92 |
| Down | ENSMUSG00000113459  | -2.24 | 4.95E-04 | Gm30655       | lincRNA | 3.02 | 3.19 | 3.16 | 3.60 | 2.00 | 2.00 | 2.71 | 2.62 |
| Down | ENSMUSG00000054944  | -1.66 | 5.20E-04 | 5330416C01Rik | lincRNA | 4.15 | 4.34 | 4.73 | 4.60 | 3.55 | 3.65 | 2.35 | 3.29 |
| Down | ENSMUSG00000111800  | -3.39 | 5.31E-04 | Gm31557       | lincRNA | 3.50 | 3.39 | 3.65 | 3.08 | 2.25 | 2.00 | 2.00 | 2.54 |
| Down | ENSMUSG00000095969  | -2.91 | 5.35E-04 | 1700030P04Rik | lincRNA | 3.18 | 3.33 | 3.36 | 3.82 | 2.47 | 2.00 | 2.24 | 2.44 |
| Down | ENSMUSG00000112303  | -3.28 | 5.37E-04 | Gm48759       | lincRNA | 2.54 | 2.95 | 3.16 | 2.00 | 2.00 | 2.00 | 2.12 | 2.00 |
| Down | ENSMUSG00000107537  | -4.90 | 5.45E-04 | Gm35037       | lincRNA | 3.18 | 3.46 | 3.30 | 3.04 | 2.00 | 2.00 | 2.24 | 2.00 |
| Down | ENSMUSG00000086124  | -4.28 | 5.85E-04 | A530076I17Rik | lincRNA | 3.81 | 4.20 | 2.84 | 3.60 | 2.25 | 2.00 | 2.00 | 2.34 |
| Down | ENSMUSG00000105057  | -4.52 | 6.02E-04 | Gm40190       | lincRNA | 2.16 | 2.43 | 2.74 | 2.49 | 2.00 | 2.00 | 2.00 | 2.00 |
| Down | ENSMUSG00000113622  | -1.05 | 6.26E-04 | Gm49749       | lincRNA | 6.17 | 6.12 | 6.06 | 6.23 | 5.47 | 5.43 | 3.75 | 5.46 |
| Up   | ENSMUSG00000097049  | 2.03  | 6.33E-04 | 6530411M01Rik | lincRNA | 3.31 | 2.95 | 3.30 | 3.39 | 3.73 | 4.99 | 5.24 | 4.53 |
| Down | ENSMUSG00000113727  | -4.94 | 7.08E-04 | Gm47781       | lincRNA | 2.54 | 2.43 | 2.42 | 2.94 | 2.00 | 2.00 | 2.00 | 2.00 |
| Down | ENSMUSG00000089726  | -2.79 | 7.23E-04 | Mir17hg       | lincRNA | 3.18 | 2.66 | 3.16 | 3.21 | 2.34 | 2.34 | 2.00 | 2.34 |
| Down | ENSMUSG000000997714 | -4.71 | 7.37E-04 | Gm20109       | lincRNA | 2.75 | 2.86 | 3.01 | 2.49 | 2.00 | 2.00 | 2.12 | 2.00 |
| Down | ENSMUSG00000107305  | -5.56 | 7.67E-04 | Gm43262       | lincRNA | 2.65 | 2.86 | 2.64 | 3.15 | 2.00 | 2.00 | 2.00 | 2.00 |
| Down | ENSMUSG00000108379  | -5.37 | 8.55E-04 | A730082K24Rik | lincRNA | 3.56 | 3.33 | 3.43 | 3.78 | 2.00 | 2.00 | 2.00 | 2.24 |
| Down | ENSMUSG00000086179  | -3.03 | 8.62E-04 | Gm14317       | lincRNA | 3.10 | 3.73 | 4.27 | 3.24 | 2.00 | 2.34 | 2.00 | 2.92 |
| Down | ENSMUSG00000094904  | -2.31 | 8.75E-04 | Gm14327       | lincRNA | 3.18 | 3.26 | 3.18 | 3.69 | 2.13 | 2.00 | 3.00 | 2.78 |
| Down | ENSMUSG00000097362  | -4.44 | 1.11E-03 | Gm26544       | lincRNA | 3.56 | 3.11 | 3.16 | 3.59 | 2.13 | 2.12 | 2.00 | 2.00 |
| Down | ENSMUSG00000093662  | -2.40 | 1.13E-03 | Gm20649       | lincRNA | 4.26 | 4.34 | 4.34 | 2.47 | 3.24 | 2.78 | 3.00 | 2.85 |
| Down | ENSMUSG00000111669  | -2.85 | 1.15E-03 | Gm31698       | lincRNA | 2.43 | 3.92 | 4.40 | 3.08 | 2.13 | 2.12 | 2.00 | 2.99 |
| Down | ENSMUSG00000113338  | -1.80 | 1.18E-03 | A530046M15Rik | lincRNA | 3.67 | 3.33 | 3.43 | 3.98 | 2.82 | 2.34 | 2.93 | 2.54 |
| Down | ENSMUSG00000109121  | -1.27 | 1.22E-03 | Gm44644       | lincRNA | 5.12 | 5.50 | 5.11 | 5.85 | 4.52 | 4.96 | 2.71 | 4.36 |
| Down | ENSMUSG00000103114  | -2.21 | 1.23E-03 | Gm32200       | lincRNA | 3.61 | 4.34 | 4.17 | 4.22 | 3.40 | 2.98 | 2.00 | 2.00 |
| Down | ENSMUSG00000103158  | -5.90 | 1.27E-03 | Gm31925       | lincRNA | 2.00 | 2.86 | 3.36 | 3.39 | 2.00 | 2.00 | 2.00 | 2.00 |
| Down | ENSMUSG00000112713  | -4.42 | 1.29E-03 | Gm48281       | lincRNA | 2.30 | 2.30 | 2.74 | 2.38 | 2.00 | 2.00 | 2.00 | 2.00 |
| Down | ENSMUSG00000115328  | -6.07 | 1.30E-03 | Gm30691       | lincRNA | 2.75 | 2.55 | 3.75 | 3.01 | 2.00 | 2.00 | 2.00 | 2.00 |
| Down | ENSMUSG00000069713  | -2.84 | 1.34E-03 | 4933406P04Rik | lincRNA | 3.50 | 3.33 | 3.50 | 3.60 | 2.00 | 2.12 | 2.34 | 2.34 |
| Down | ENSMUSG00000115050  | -5.36 | 1.39E-03 | Gm21154       | lincRNA | 2.94 | 3.39 | 2.93 | 3.08 | 2.00 | 2.00 | 2.12 | 2.12 |
| Down | ENSMUSG00000104222  | -1.35 | 1.39E-03 | Gm7292        | lincRNA | 4.07 | 3.88 | 4.17 | 4.42 | 2.90 | 3.43 | 3.54 | 2.92 |
| Down | ENSMUSG0            |       |          |               |         |      |      |      |      |      |      |      |      |

|      |                     |       |          |               |         |      |      |      |      |      |      |      |      |
|------|---------------------|-------|----------|---------------|---------|------|------|------|------|------|------|------|------|
| Down | ENSMUSG00000112630  | -3.68 | 1.50E-03 | Gm36908       | lincRNA | 3.02 | 3.83 | 4.37 | 4.28 | 2.00 | 2.00 | 2.00 | 2.92 |
| Down | ENSMUSG00000101856  | -1.77 | 1.52E-03 | 1700096K18Rik | lincRNA | 4.45 | 3.92 | 4.13 | 3.74 | 3.60 | 2.78 | 2.13 | 2.99 |
| Down | ENSMUSG00000110329  | -3.72 | 1.53E-03 | Gm45304       | lincRNA | 3.25 | 3.73 | 3.01 | 3.78 | 2.00 | 2.00 | 2.00 | 2.62 |
| Down | ENSMUSG00000109244  | -2.67 | 1.56E-03 | Gm44751       | lincRNA | 4.03 | 4.01 | 3.54 | 3.98 | 2.13 | 2.53 | 2.13 | 3.06 |
| Down | ENSMUSG000000085912 | -2.32 | 1.60E-03 | Trp53cor1     | lincRNA | 4.32 | 3.57 | 3.70 | 3.33 | 3.11 | 2.00 | 2.00 | 2.85 |
| Down | ENSMUSG00000040467  | -2.50 | 1.67E-03 | 4921522P10Rik | lincRNA | 2.65 | 3.26 | 3.16 | 2.94 | 2.00 | 2.00 | 2.00 | 2.78 |
| Down | ENSMUSG000000097352 | -5.34 | 1.68E-03 | Gm14149       | lincRNA | 2.85 | 2.86 | 3.06 | 2.90 | 2.00 | 2.00 | 2.00 | 2.12 |
| Down | ENSMUSG00000111284  | -4.71 | 1.68E-03 | Gm47334       | lincRNA | 2.94 | 2.66 | 2.66 | 2.59 | 2.00 | 2.00 | 2.00 | 2.12 |
| Down | ENSMUSG00000114118  | -3.77 | 1.75E-03 | Gm48829       | lincRNA | 3.67 | 2.55 | 3.09 | 3.15 | 2.13 | 2.24 | 2.13 | 2.00 |
| Down | ENSMUSG00000099797  | -1.47 | 1.81E-03 | Gm26901       | lincRNA | 4.11 | 3.78 | 3.80 | 4.19 | 2.25 | 3.43 | 2.86 | 3.34 |
| Down | ENSMUSG00000090104  | -2.17 | 1.82E-03 | Slmapos2      | lincRNA | 3.81 | 3.68 | 4.01 | 3.78 | 2.25 | 2.98 | 2.00 | 3.06 |
| Down | ENSMUSG00000106525  | -4.32 | 1.84E-03 | Gm42695       | lincRNA | 2.65 | 2.55 | 2.29 | 2.14 | 2.00 | 2.00 | 2.00 | 2.00 |
| Down | ENSMUSG00000111576  | -3.77 | 1.94E-03 | Gm32284       | lincRNA | 2.94 | 2.66 | 2.84 | 3.27 | 2.00 | 2.12 | 2.00 | 2.24 |
| Down | ENSMUSG00000109436  | -5.05 | 2.00E-03 | Gm45075       | lincRNA | 2.55 | 2.55 | 2.74 | 2.00 | 2.00 | 2.00 | 2.00 | 2.00 |
| Down | ENSMUSG00000097115  | -3.13 | 2.01E-03 | 1810019N24Rik | lincRNA | 2.75 | 3.46 | 3.30 | 3.78 | 2.00 | 2.53 | 2.00 | 2.34 |
| Down | ENSMUSG00000109127  | -6.16 | 2.05E-03 | Gm31135       | lincRNA | 3.10 | 3.03 | 3.01 | 3.39 | 2.00 | 2.00 | 2.00 | 2.00 |
| Down | ENSMUSG00000106293  | -3.99 | 2.10E-03 | Gm42476       | lincRNA | 3.38 | 3.57 | 2.64 | 3.39 | 2.00 | 2.00 | 2.00 | 2.44 |
| Down | ENSMUSG00000114980  | -3.27 | 2.11E-03 | 4933432i03Rik | lincRNA | 3.96 | 3.26 | 4.24 | 3.39 | 2.00 | 2.53 | 2.00 | 2.54 |
| Down | ENSMUSG00000114354  | -4.89 | 2.13E-03 | Gm34961       | lincRNA | 2.54 | 2.86 | 2.84 | 3.15 | 2.00 | 2.00 | 2.00 | 2.12 |
| Down | ENSMUSG00000111236  | -2.54 | 2.16E-03 | Gm31614       | lincRNA | 2.65 | 4.05 | 3.75 | 3.55 | 2.47 | 2.34 | 2.00 | 2.78 |
| Down | ENSMUSG00000097701  | -3.74 | 2.18E-03 | Gm17508       | lincRNA | 2.90 | 3.26 | 2.93 | 3.08 | 2.00 | 2.00 | 2.00 | 2.34 |
| Down | ENSMUSG00000099804  | -3.10 | 2.22E-03 | Gm28497       | lincRNA | 3.56 | 2.76 | 3.16 | 3.45 | 2.66 | 2.00 | 2.00 | 2.12 |
| Down | ENSMUSG00000085196  | -2.78 | 2.26E-03 | Gm14963       | lincRNA | 3.31 | 3.52 | 3.43 | 3.78 | 2.13 | 2.53 | 2.00 | 2.62 |
| Down | ENSMUSG00000109028  | -1.86 | 2.35E-03 | Gm35842       | lincRNA | 3.10 | 3.63 | 3.97 | 3.65 | 2.25 | 2.12 | 2.93 | 3.06 |
| Down | ENSMUSG00000086921  | -4.18 | 2.40E-03 | Gm13189       | lincRNA | 2.00 | 2.43 | 2.00 | 2.27 | 2.00 | 2.00 | 2.00 | 2.00 |
| Down | ENSMUSG00000085772  | -2.93 | 2.41E-03 | D630024D03Rik | lincRNA | 3.25 | 3.11 | 2.42 | 3.21 | 2.37 | 2.00 | 2.00 | 2.34 |
| Down | ENSMUSG00000115834  | -1.05 | 2.42E-03 | Gm10385       | lincRNA | 4.11 | 4.09 | 4.13 | 4.19 | 3.11 | 3.11 | 3.79 | 3.53 |
| Up   | ENSMUSG00000111938  | 1.70  | 2.45E-03 | 2900045O20Rik | lincRNA | 4.11 | 3.19 | 4.20 | 3.90 | 5.37 | 4.56 | 5.89 | 5.10 |
| Down | ENSMUSG00000113544  | -4.49 | 2.49E-03 | 4833405L11Rik | lincRNA | 3.56 | 2.55 | 3.43 | 3.60 | 2.12 | 2.00 | 2.00 | 2.24 |
| Down | ENSMUSG00000075553  | -1.28 | 2.57E-03 | Gm5464        | lincRNA | 4.22 | 4.01 | 4.20 | 4.28 | 2.37 | 2.85 | 3.54 | 3.92 |
| Down | ENSMUSG00000108739  | -5.33 | 2.58E-03 | Gm45096       | lincRNA | 2.94 | 2.86 | 2.74 | 2.38 | 2.00 | 2.00 | 2.00 | 2.00 |
| Down | ENSMUSG00000104785  | -5.86 | 2.64E-03 | Gm31121       | lincRNA | 3.38 | 3.33 | 3.49 | 3.33 | 2.00 | 2.00 | 2.00 | 2.12 |
| Down | ENSMUSG00000105324  | -3.96 | 2.65E-03 | Gm42705       | lincRNA | 3.10 | 3.03 | 3.23 | 3.24 | 2.13 | 2.12 | 2.00 | 2.12 |
| Down | ENSMUSG00000112854  | -4.36 | 2.68E-03 | Gm38403       | lincRNA | 2.75 | 3.52 | 3.65 | 2.94 | 2.00 | 2.00 | 2.00 | 2.34 |
| Down | ENSMUSG00000110390  | -1.17 | 2.72E-03 | Gm45869       | lincRNA | 4.36 | 3.39 | 3.70 | 3.65 | 3.35 | 3.32 | 3.19 | 2.85 |
| Down | ENSMUSG00000039563  | -1.11 | 2.82E-03 | 2210406O10Rik | lincRNA | 4.29 | 4.74 | 4.80 | 4.67 | 3.91 | 3.73 | 3.40 | 3.99 |
| Down | ENSMUSG00000112819  | -4.88 | 2.88E-03 | Gm46332       | lincRNA | 2.54 | 2.43 | 2.74 | 2.59 | 2.00 | 2.00 | 2.00 | 2.00 |
| Down | ENSMUSG00000085354  | -3.93 | 2.89E-03 | Gm2044        | lincRNA | 3.02 | 2.76 | 2.54 | 2.69 | 2.00 | 2.00 | 2.00 | 2.24 |
| Down | ENSMUSG00000054622  | -2.44 | 2.93E-03 | D730045B01Rik | lincRNA | 3.38 | 3.33 | 4.17 | 3.50 | 2.66 | 2.98 | 2.00 | 2.00 |
| Down | ENSMUSG00000112121  | -1.91 | 2.93E-03 | C230072F16Rik | lincRNA | 3.77 | 3.68 | 4.27 | 4.58 | 3.04 | 2.98 | 2.00 | 3.34 |
| Down | ENSMUSG00000086825  | -2.06 | 3.00E-03 | Gm15675       | lincRNA | 3.99 | 3.33 | 3.60 | 3.27 | 2.00 | 2.24 | 2.45 | 3.23 |
| Down | ENSMUSG00000087461  | -2.88 | 3.19E-03 | C230014O12Rik | lincRNA | 3.44 | 2.76 | 3.30 | 3.65 | 2.13 | 2.00 | 2.00 | 2.78 |
| Down | ENSMUSG00000101621  | -2.19 | 3.20E-03 | Gm28905       | lincRNA | 3.31 | 3.92 | 3.49 | 3.94 | 3.17 | 2.34 | 2.00 | 2.54 |
| Down | ENSMUSG00000116525  | -1.65 | 3.23E-03 | Gm30371       | lincRNA | 5.08 | 4.67 | 4.97 | 5.40 | 4.59 | 3.17 | 2.00 | 4.02 |
| Down | ENSMUSG00000105222  | -4.02 | 3.26E-03 | Gm42205       | lincRNA | 2.43 | 3.19 | 2.42 | 3.01 | 2.00 | 2.00 | 2.13 | 2.12 |
| Down | ENSMUSG00000115813  | -2.04 | 3.28E-03 | Gm34418       | lincRNA | 3.18 | 3.19 | 3.65 | 3.45 | 2.47 | 2.00 | 2.79 | 2.54 |
| Down | ENSMUSG00000106555  | -2.05 | 3.29E-03 | Gm39477       | lincRNA | 3.61 | 3.88 | 3.60 | 3.86 | 2.37 | 2.62 | 2.00 | 2.85 |
| Down | ENSMUSG00000113210  | -5.44 | 3.33E-03 | 4930474N09Rik | lincRNA | 2.00 | 2.76 | 3.60 | 2.27 | 2.00 | 2.00 | 2.00 | 2.00 |
| Down | ENSMUSG00000111809  | -3.81 | 3.34E-03 | Gm49334       | lincRNA | 2.54 | 2.86 | 2.93 | 2.49 | 2.00 | 2.12 | 2.00 | 2.12 |
| Down | ENSMUSG00000097035  | -5.06 | 3.40E-03 | Gm26692       | lincRNA | 3.10 | 2.55 | 2.42 | 2.38 | 2.00 | 2.00 | 2.00 | 2.00 |
| Down | ENSMUSG00000115317  | -1.54 | 3.42E-03 | Gm32618       | lincRNA | 4.80 | 4.20 | 4.27 | 4.45 | 3.60 | 3.11 | 2.13 | 3.95 |
| Down | ENSMUSG00000101493  | -1.35 | 3.45E-03 | 2810405F17Rik | lincRNA | 4.36 | 3.57 | 4.09 | 4.22 | 2.66 | 3.61 | 3.35 | 2.92 |
| Down | ENSMUSG00000115821  | -2.34 | 3.56E-03 | 6330576A10Rik | lincRNA | 2.75 | 2.95 | 3.54 | 3.33 | 2.00 | 2.34 | 2.00 | 2.78 |
| Down | ENSMUSG00000097616  | -1.12 | 3.56E-03 | 1110019D14Rik | lincRNA | 4.91 | 4.84 | 4.13 | 4.55 | 4.36 | 3.77 | 3.50 | 3.17 |
| Down | ENSMUSG00000107388  | -2.21 | 3.62E-03 | Gm42788       | lincRNA | 3.10 | 2.76 | 3.23 | 3.20 | 2.00 | 2.00 | 2.00 | 2.44 |
| Down | ENSMUSG00000115650  | -1.34 | 3.63E-03 | Gm48992       | lincRNA | 4.51 | 4.20 | 4.13 | 3.94 | 4.00 | 3.17 | 2.79 | 2.85 |
| Down | ENSMUSG00000111874  | -4.61 | 3.64E-03 | Gm36539       | lincRNA | 2.54 | 2.30 | 2.42 | 2.69 | 2.00 | 2.00 | 2.00 | 2.00 |
| Down | ENSMUSG00000085235  | -2.59 | 3.68E-03 | Gm12576       | lincRNA | 3.77 | 3.11 | 3.43 | 4.02 | 2.57 | 2.00 | 2.00 | 2.42 |
| Down | ENSMUSG00000106679  | -2.89 | 3.70E-03 | Gm42524       | lincRNA | 3.18 | 3.26 | 3.30 | 3.21 | 2.24 | 2.00 | 2.00 | 2.92 |
| Down | ENSMUSG00000101429  | -2.73 | 3.70E-03 | BC055402      | lincRNA | 3.91 | 4.17 | 3.93 | 4.02 | 2.57 | 2.70 | 2.00 | 2.78 |
| Down | ENSMUSG00000112883  | -4.53 | 3.73E-03 | Gm48023       | lincRNA | 2.43 | 2.55 | 2.42 | 2.49 | 2.00 | 2.00 | 2.00 | 2.00 |
| Up   | ENSMUSG00000097182  | 1.21  | 3.77E-03 | A830009L08Rik | lincRNA | 2.85 | 3.33 | 3.23 | 3.08 | 3.85 | 3.84 | 4.19 | 3.74 |
| Down | ENSMUSG000000201874 | -2.32 | 3.84E-03 | 4933413J09Rik | lincRNA | 3.81 | 3.57 | 4.17 | 4.22 | 2.00 | 3.22 | 2.00 | 2.99 |
| Down | ENSMUSG00000067101  | -2.86 | 3.86E-03 | 170001H22Rik  | lincRNA | 3.10 | 4.09 | 3.70 | 3.60 | 2.00 | 2.00 | 2.54 | 2.54 |
| Down | ENSMUSG00000115625  | -3.39 | 3.87E-03 | 2900040C04Rik | lincRNA | 4.51 | 2.16 | 2.42 | 4.92 | 2.82 | 2.24 | 2.00 | 2.24 |
| Down | ENSMUSG00000111722  | -1.62 | 3.90E-03 | Gm47270       | lincRNA | 3.56 | 4.61 | 3.65 | 3.86 | 3.11 | 2.78 | 2.13 | 3.53 |
| Down | ENSMUSG00000107008  | -1.50 | 3.93E-03 | Gm2762        | lincRNA | 5.42 | 5.15 | 5.17 | 4.92 | 5.61 | 2.70 | 3.35 | 4.36 |
| Up   | ENSMUSG00000100558  | 1.99  | 4.02E-03 | 1700025F24Rik | lincRNA | 3.04 | 3.11 | 3.30 | 2.94 | 4.04 | 4.54 | 4.04 | 3.99 |
| Down | ENSMUSG00000099054  | -4.95 | 4.02E-03 | Gm27242       | lincRNA | 3.10 | 2.86 | 2.54 | 3.01 | 2.00 | 2.13 | 2.00 | 2.00 |
| Down | ENSMUSG00000109823  | -3.79 | 4.11E-03 | Gm45388       | lincRNA | 3.67 | 4.27 | 3.93 | 4.28 | 2.37 | 2.53 | 2.00 | 2.24 |
| Down | ENSMUSG00000099950  | -4.10 | 4.13E-03 | 9130227L01Rik | lincRNA | 2.85 | 3.11 | 2.84 | 3.55 | 2.00 | 2.00 | 2.00 | 2.34 |
| Down | ENSMUSG00000115813  | -1.38 | 4.13E-03 | Gm48447       | lincRNA | 3.77 | 4.01 | 3.84 | 3.50 | 3.40 | 2.24 | 3.07 | 2.92 |
| Down | ENSMUSG00000097289  | -5.92 | 4.15E-03 | 4933424M12Rik | lincRNA | 3.02 | 3.11 | 2.74 | 3.15 | 2.00 | 2.00 | 2.00 | 2.00 |
| Down | ENSMUSG00000114961  | 2.95  | 4.31E-03 | Gm44053       | lincRNA | 3.31 | 3.19 | 3.25 | 2.69 | 2.00 | 2.25 | 2.00 | 2.44 |
| Down | ENSMUSG00000109215  | -3.94 | 4.34E-03 | 4930453L07Rik | lincRNA | 3.10 | 3.19 | 3.49 | 3.27 | 2.13 | 2.00 | 2.35 | 2.00 |
| Down | ENSMUSG00000114185  | -4.63 | 4.41E-03 | Gm47662       | lincRNA | 3.61 | 2.95 | 3.23 | 2.27 | 2.00 | 2.12 | 2.00 | 2.12 |
| Down | ENSMUSG00000111061  | -4.35 | 4.47E-03 | Gm46102       | lincRNA | 3.18 | 3.11 | 3.09 | 2.27 | 2.00 | 2.00 | 2.00 | 2.24 |
| Down | ENSMUSG00000114815  | -3.25 | 4.55E-03 | Gm41118       | lincRNA | 3.56 | 3.88 | 3.36 | 3.39 | 2.25 | 2.00 | 2.00 | 2.70 |
| Down | ENSMUSG00000105686  | -1.75 | 4.65E-03 | Gm35394       | lincRNA | 3.25 | 3.63 | 3.60 | 3.39 | 2.98 | 2.00 | 2.00 | 2.24 |
| Down | ENSMUSG00000113343  | -2.25 | 4.67E-03 | Gm34923       | lincRNA | 3.50 | 4.01 | 4.09 | 3.90 | 2.74 | 2.45 | 2.00 | 2.62 |
| Down | ENSMUSG00000109819  | -2.60 | 4.68E-03 | B930018H19Rik | lincRNA | 3.38 | 3.83 | 3.66 | 3.78 | 2.12 | 2.78 | 2.00 | 2.78 |
| Down | ENSMUSG00000100213  | -1.45 | 4.72E-03 | Gm28151       | lincRNA | 3.86 | 4.56 | 4.85 | 4.58 | 2.25 | 4.16 | 3.30 | 3.44 |
| Down | ENSMUSG00000111229  | -2.20 | 4.75E-03 | Gm39323       | lincRNA | 4.11 | 3.46 | 3.40 | 3.75 | 2.00 | 2.54 | 2.00 | 2.24 |
| Down | ENSMUSG00000113883  | -3.96 | 4.76E-03 | Gm36500       | lincRNA | 2.30 | 2.76 | 3.49 | 3.33 | 2.00 | 2.00 | 2.00 | 2.34 |
| Down | ENSMUSG00000111498  | -3.23 | 4.80E-03 | Gm47059       | lincRNA | 3.18 | 3.11 | 2.29 | 2.86 | 2.00 |      |      |      |

|      |                    |       |          |               |         |       |       |       |       |       |       |       |       |
|------|--------------------|-------|----------|---------------|---------|-------|-------|-------|-------|-------|-------|-------|-------|
| Down | ENSMUSG00000113866 | -3.38 | 5.20E-03 | Gm47450       | lincRNA | 3.56  | 3.52  | 2.84  | 3.08  | 2.00  | 2.00  | 2.54  | 2.12  |
| Down | ENSMUSG00000108593 | -5.35 | 5.27E-03 | Gm44581       | lincRNA | 3.18  | 4.13  | 2.74  | 3.65  | 2.00  | 2.00  | 2.00  | 2.24  |
| Down | ENSMUSG00000097725 | -1.92 | 5.46E-03 | 4930593A02Rik | lincRNA | 3.81  | 3.39  | 2.97  | 3.55  | 2.62  | 2.62  | 2.00  | 3.17  |
| Down | ENSMUSG00000107010 | -4.83 | 5.48E-03 | Gm43293       | lincRNA | 3.18  | 3.03  | 2.54  | 2.49  | 2.00  | 2.00  | 2.00  | 2.12  |
| Down | ENSMUSG00000100120 | -3.39 | 5.52E-03 | Gm553         | lincRNA | 3.25  | 3.68  | 4.01  | 3.55  | 2.00  | 2.00  | 2.00  | 2.85  |
| Down | ENSMUSG00000097277 | -1.46 | 5.62E-03 | 2900076A07Rik | lincRNA | 4.75  | 4.34  | 5.20  | 4.80  | 2.47  | 4.58  | 3.35  | 3.48  |
| Down | ENSMUSG00000095316 | -2.61 | 5.77E-03 | D33005023Rik  | lincRNA | 4.51  | 4.09  | 4.61  | 4.19  | 2.87  | 2.97  | 2.00  | 2.99  |
| Down | ENSMUSG00000118604 | -3.23 | 5.89E-03 | Gm49559       | lincRNA | 2.65  | 2.86  | 2.93  | 2.38  | 2.00  | 2.00  | 2.00  | 2.34  |
| Down | ENSMUSG00000099370 | -2.77 | 5.91E-03 | Plat10        | lincRNA | 3.02  | 3.03  | 3.43  | 3.15  | 2.25  | 2.24  | 2.00  | 2.44  |
| Down | ENSMUSG00000115912 | -2.79 | 6.00E-03 | Gm35569       | lincRNA | 3.10  | 3.26  | 3.70  | 3.27  | 2.00  | 2.85  | 2.00  | 2.12  |
| Down | ENSMUSG00000085658 | -2.93 | 6.04E-03 | Gm15704       | lincRNA | 2.94  | 3.46  | 2.42  | 3.50  | 2.00  | 2.00  | 2.00  | 2.70  |
| Down | ENSMUSG00000112035 | -1.62 | 6.05E-03 | Gm49335       | lincRNA | 3.02  | 3.39  | 3.70  | 3.74  | 2.25  | 2.70  | 2.71  | 2.92  |
| Down | ENSMUSG00000103170 | -5.77 | 6.20E-03 | Gm37170       | lincRNA | 2.75  | 2.43  | 3.01  | 3.39  | 2.00  | 2.00  | 2.00  | 2.00  |
| Down | ENSMUSG00000033015 | -2.65 | 6.34E-03 | 4933427E13Rik | lincRNA | 3.38  | 3.46  | 3.43  | 3.78  | 2.37  | 2.12  | 2.00  | 2.85  |
| Down | ENSMUSG00000115257 | -5.21 | 6.35E-03 | Gm30467       | lincRNA | 2.43  | 2.30  | 2.93  | 3.01  | 2.00  | 2.00  | 2.00  | 2.00  |
| Down | ENSMUSG00000085933 | -2.07 | 6.42E-03 | Tmem61        | lincRNA | 3.25  | 4.34  | 2.47  | 4.02  | 2.43  | 3.05  | 2.13  | 3.23  |
| Down | ENSMUSG00000085431 | -5.49 | 6.63E-03 | 4930440119Rik | lincRNA | 2.54  | 3.26  | 2.93  | 3.69  | 2.00  | 2.00  | 2.00  | 2.00  |
| Down | ENSMUSG00000112496 | -3.92 | 6.63E-03 | Gm48764       | lincRNA | 3.96  | 2.95  | 2.29  | 3.01  | 2.00  | 2.12  | 2.00  | 2.24  |
| Down | ENSMUSG00000044544 | -3.43 | 6.83E-03 | 492151303Rik  | lincRNA | 2.94  | 3.19  | 3.43  | 3.01  | 2.00  | 2.00  | 2.00  | 2.54  |
| Down | ENSMUSG00000108383 | -4.68 | 6.94E-03 | Gm6567        | lincRNA | 3.02  | 3.11  | 2.74  | 3.50  | 2.00  | 2.00  | 2.00  | 2.24  |
| Down | ENSMUSG00000097205 | -2.35 | 6.97E-03 | Gm17540       | lincRNA | 4.26  | 2.95  | 2.37  | 3.90  | 2.37  | 2.00  | 2.00  | 2.78  |
| Down | ENSMUSG00000086804 | -1.35 | 7.40E-03 | Gm43154       | lincRNA | 5.21  | 5.23  | 5.29  | 4.98  | 4.54  | 3.56  | 3.87  | 4.08  |
| Down | ENSMUSG00000104328 | -4.03 | 7.52E-03 | Gm37323       | lincRNA | 3.61  | 2.66  | 3.54  | 3.27  | 2.00  | 2.00  | 2.35  | 2.12  |
| Down | ENSMUSG00000103908 | -4.81 | 7.65E-03 | Gm37502       | lincRNA | 3.31  | 2.43  | 2.74  | 2.69  | 2.00  | 2.00  | 2.00  | 2.12  |
| Down | ENSMUSG00000045928 | -1.85 | 7.72E-03 | 4933440M02Rik | lincRNA | 3.44  | 4.50  | 3.60  | 3.82  | 2.82  | 2.53  | 2.93  | 2.92  |
| Down | ENSMUSG00000100002 | -2.74 | 8.07E-03 | Gm29642       | lincRNA | 3.56  | 3.03  | 3.30  | 3.69  | 2.00  | 2.00  | 3.00  | 2.00  |
| Down | ENSMUSG00000110239 | -4.06 | 8.09E-03 | Gm45620       | lincRNA | 2.54  | 2.30  | 2.42  | 2.14  | 2.00  | 2.00  | 2.00  | 2.00  |
| Down | ENSMUSG00000111883 | -2.08 | 8.19E-03 | Gm31182       | lincRNA | 3.25  | 3.92  | 4.17  | 4.12  | 3.29  | 2.44  | 2.13  | 2.78  |
| Down | ENSMUSG00000084758 | -5.16 | 8.21E-03 | Gm12798       | lincRNA | 2.16  | 2.55  | 3.01  | 2.86  | 2.00  | 2.00  | 2.00  | 2.00  |
| Down | ENSMUSG00000059631 | -1.17 | 8.22E-03 | 1500035N22Rik | lincRNA | 2.75  | 3.33  | 3.49  | 3.33  | 2.00  | 2.78  | 2.93  | 2.85  |
| Down | ENSMUSG00000097261 | -2.39 | 8.28E-03 | 4930532G15Rik | lincRNA | 3.02  | 3.83  | 3.23  | 4.02  | 2.00  | 3.22  | 2.00  | 2.24  |
| Down | ENSMUSG00000104847 | -4.98 | 8.29E-03 | Gm43177       | lincRNA | 2.65  | 2.76  | 2.54  | 2.49  | 2.00  | 2.00  | 2.00  | 2.00  |
| Down | ENSMUSG00000101440 | -1.71 | 8.40E-03 | 5430421F1Rik  | lincRNA | 3.61  | 4.31  | 3.64  | 3.69  | 2.57  | 3.28  | 3.13  | 3.44  |
| Down | ENSMUSG00000103349 | -3.35 | 8.68E-03 | Gm36888       | lincRNA | 2.94  | 3.57  | 3.09  | 3.62  | 2.00  | 2.00  | 2.00  | 2.54  |
| Down | ENSMUSG00000102545 | -1.07 | 8.73E-03 | 6430573P05Rik | lincRNA | 5.15  | 4.74  | 5.11  | 4.37  | 4.52  | 2.92  | 3.67  | 4.41  |
| Down | ENSMUSG00000115354 | -4.25 | 8.74E-03 | Gm49083       | lincRNA | 2.85  | 2.30  | 3.01  | 3.27  | 2.00  | 2.00  | 2.24  | 2.00  |
| Down | ENSMUSG00000100827 | -5.67 | 8.76E-03 | Gm29069       | lincRNA | 3.25  | 2.30  | 3.01  | 2.86  | 2.00  | 2.00  | 2.00  | 2.00  |
| Down | ENSMUSG00000113644 | -3.89 | 8.76E-03 | 4930448C13Rik | lincRNA | 3.10  | 3.88  | 3.93  | 3.90  | 2.00  | 2.24  | 2.00  | 2.54  |
| Down | ENSMUSG00000105316 | -4.11 | 9.32E-03 | Gm42953       | lincRNA | 2.94  | 2.76  | 2.15  | 2.27  | 2.00  | 2.00  | 2.00  | 2.12  |
| Down | ENSMUSG00000115965 | -1.77 | 9.32E-03 | Gm30564       | lincRNA | 3.67  | 3.26  | 3.80  | 3.08  | 2.37  | 2.92  | 2.63  | 2.44  |
| Down | ENSMUSG00000085016 | -5.12 | 9.39E-03 | Gm11335       | lincRNA | 2.43  | 3.11  | 3.70  | 2.14  | 2.00  | 2.00  | 2.00  | 2.12  |
| Down | ENSMUSG00000111086 | -4.61 | 9.51E-03 | Gm48671       | lincRNA | 2.30  | 2.16  | 2.84  | 2.59  | 2.00  | 2.00  | 2.00  | 2.00  |
| Down | ENSMUSG00000110260 | -2.01 | 9.53E-03 | Gm30504       | lincRNA | 4.07  | 3.52  | 3.49  | 3.74  | 2.57  | 2.53  | 2.63  | 2.85  |
| Down | ENSMUSG00000101978 | -5.76 | 9.72E-03 | 1700063O14Rik | lincRNA | 2.43  | 2.76  | 2.74  | 3.55  | 2.00  | 2.00  | 2.00  | 2.00  |
| Down | ENSMUSG00000115623 | -4.74 | 9.78E-03 | Gm41225       | lincRNA | 3.18  | 3.19  | 3.75  | 3.74  | 2.00  | 2.34  | 2.00  | 2.62  |
| Down | ENSMUSG00000114959 | -3.23 | 9.82E-03 | G630093K05Rik | lincRNA | 2.65  | 2.95  | 3.43  | 3.90  | 2.00  | 2.12  | 2.00  | 2.00  |
| Down | ENSMUSG00000098424 | -1.95 | 9.97E-03 | Gm27202       | lincRNA | 3.61  | 4.20  | 4.13  | 4.05  | 2.25  | 2.92  | 2.00  | 3.84  |
| Down | ENSMUSG00000097697 | -2.58 | 9.98E-03 | 4833412C05Rik | lincRNA | 2.85  | 3.52  | 3.16  | 3.33  | 2.00  | 2.53  | 2.24  | 2.34  |
| Up   | ENSMUSG00000104796 | 2.44  | 5.49E-99 | Gm44354       | miRNA   | 6.28  | 6.58  | 6.40  | 6.36  | 8.28  | 8.73  | 8.84  | 8.72  |
| Down | ENSMUSG00000105398 | -7.53 | 2.82E-74 | Gm47305       | miRNA   | 10.74 | 10.43 | 10.28 | 10.22 | 2.74  | 3.56  | 3.67  | 3.85  |
| Down | ENSMUSG00000105788 | -7.44 | 4.44E-66 | Gm47295       | miRNA   | 10.16 | 9.88  | 9.70  | 9.68  | 2.66  | 3.43  | 3.19  | 3.48  |
| Down | ENSMUSG00000076036 | -1.95 | 1.06E-55 | Gm22133       | miRNA   | 8.97  | 8.84  | 8.91  | 8.92  | 6.88  | 6.70  | 7.22  | 7.12  |
| Up   | ENSMUSG00000088246 | 1.09  | 1.01E-46 | Gm25911       | miRNA   | 8.65  | 8.61  | 8.67  | 8.55  | 9.81  | 9.64  | 9.68  | 9.67  |
| Down | ENSMUSG00000105145 | -8.49 | 2.30E-42 | Gm47299       | miRNA   | 8.76  | 8.39  | 8.29  | 7.93  | 2.00  | 2.34  | 2.13  | 2.62  |
| Down | ENSMUSG00000105913 | -1.58 | 4.08E-42 | Mir5121       | miRNA   | 9.57  | 9.35  | 9.47  | 9.38  | 7.95  | 7.96  | 7.56  | 8.00  |
| Down | ENSMUSG00000077990 | -2.53 | 4.84E-41 | Gm23134       | miRNA   | 6.34  | 6.63  | 6.61  | 6.88  | 4.52  | 4.49  | 3.63  | 4.59  |
| Up   | ENSMUSG00000092956 | 2.28  | 8.36E-38 | Gm26220       | miRNA   | 5.51  | 5.93  | 5.53  | 5.72  | 7.80  | 7.96  | 7.80  | 7.80  |
| Up   | ENSMUSG00000088609 | 1.09  | 2.48E-37 | Gm24187       | miRNA   | 10.35 | 10.17 | 10.33 | 10.16 | 11.43 | 11.41 | 11.26 | 11.25 |
| Down | ENSMUSG00000106279 | -7.16 | 5.94E-36 | Gm47287       | miRNA   | 10.26 | 9.93  | 9.77  | 9.63  | 2.37  | 2.92  | 4.16  | 3.62  |
| Down | ENSMUSG00000098455 | -2.62 | 2.19E-23 | Mir1906-1     | miRNA   | 5.06  | 5.75  | 5.92  | 5.99  | 2.97  | 3.47  | 3.87  | 3.81  |
| Up   | ENSMUSG00000076281 | 1.27  | 2.79E-21 | Gm24270       | miRNA   | 11.24 | 10.79 | 10.98 | 10.49 | 12.15 | 12.31 | 12.17 | 12.04 |
| Down | ENSMUSG00000092972 | -2.46 | 2.48E-20 | Mir3078       | miRNA   | 5.26  | 5.04  | 5.68  | 5.53  | 3.45  | 3.73  | 2.71  | 3.70  |
| Up   | ENSMUSG00000092896 | 2.65  | 1.78E-19 | Gm23811       | miRNA   | 4.07  | 4.17  | 3.43  | 4.15  | 6.17  | 6.42  | 6.54  | 5.97  |
| Up   | ENSMUSG00000076123 | 2.11  | 8.97E-19 | Mir700        | miRNA   | 4.26  | 4.27  | 4.13  | 4.65  | 5.87  | 6.47  | 6.32  | 6.15  |
| Down | ENSMUSG00000104740 | -6.95 | 1.42E-18 | Mir6516       | miRNA   | 6.20  | 5.75  | 5.90  | 5.79  | 2.00  | 2.00  | 2.35  | 2.24  |
| Down | ENSMUSG00000104863 | -7.96 | 2.49E-16 | Gm49347       | miRNA   | 6.30  | 6.38  | 6.08  | 5.91  | 2.00  | 2.00  | 2.00  | 2.34  |
| Up   | ENSMUSG00000092686 | 1.38  | 7.06E-16 | Gm25745       | miRNA   | 8.16  | 7.73  | 7.33  | 7.46  | 9.46  | 8.91  | 8.88  | 8.95  |
| Down | ENSMUSG00000104690 | -4.17 | 1.70E-15 | Gm47304       | miRNA   | 5.34  | 5.28  | 5.24  | 4.91  | 2.12  | 2.12  | 3.24  | 2.34  |
| Up   | ENSMUSG00000099225 | 1.34  | 4.09E-15 | Mir8104       | miRNA   | 6.25  | 5.82  | 6.15  | 5.76  | 7.51  | 7.52  | 6.84  | 7.21  |
| Down | ENSMUSG00000104599 | -8.38 | 1.19E-13 | Gm49346       | miRNA   | 5.36  | 4.58  | 4.70  | 4.70  | 2.00  | 2.00  | 2.00  | 2.00  |
| Down | ENSMUSG00000076138 | -2.00 | 1.55E-13 | Gm26377       | miRNA   | 8.74  | 9.11  | 8.67  | 9.24  | 6.55  | 7.58  | 6.54  | 7.04  |
| Down | ENSMUSG00000098652 | -1.36 | 1.25E-12 | Gm27671       | miRNA   | 6.49  | 6.86  | 6.47  | 6.73  | 4.88  | 5.81  | 5.36  | 5.27  |
| Down | ENSMUSG00000106470 | -4.55 | 2.28E-11 | Mir7055       | miRNA   | 4.31  | 4.31  | 3.75  | 4.42  | 2.00  | 2.12  | 2.00  | 2.34  |
| Down | ENSMUSG00000104858 | -3.98 | 2.28E-11 | Mir136        | miRNA   | 4.51  | 3.68  | 3.89  | 4.53  | 2.00  | 2.44  | 2.35  | 2.34  |
| Down | ENSMUSG00000070129 | -3.70 | 4.92E-11 | Mir3071       | miRNA   | 4.59  | 3.88  | 3.89  | 4.42  | 2.00  | 2.44  | 2.35  | 2.62  |
| Down | ENSMUSG00000092885 | -1.02 | 2.09E-10 | Gm22123       | miRNA   | 7.11  | 7.53  | 7.27  | 7.48  | 6.29  | 6.74  | 6.15  | 6.25  |
| Down | ENSMUSG00000076372 | -2.05 | 2.59E-10 | Mir568        | miRNA   | 5.76  | 5.17  | 5.83  | 5.25  | 4.00  | 3.65  | 3.07  | 4.33  |
| Down | ENSMUSG00000093092 | -2.60 | 1.01E-09 | Gm22643       | miRNA   | 5.45  | 5.55  | 5.13  | 5.24  | 2.37  | 3.43  | 2.54  | 4.20  |
| Down | ENSMUSG00000093133 | -1.18 | 4.69E-09 | Gm25994       | miRNA   | 6.10  | 5.87  | 5.93  | 5.94  | 4.16  | 4.96  | 5.14  | 5.11  |
| Down | ENSMUSG00000072837 | -1.51 | 1.25E-08 | Mir546        | miRNA   | 5.73  | 5.49  | 5.49  | 5.16  | 4.03  | 4.16  | 3.94  | 4.55  |
| Up   | ENSMUSG00000099258 | 1.90  | 2.15E-08 | Mir7047       | miRNA   | 4.18  | 3.92  | 3.70  | 4.22  | 5.34  | 6.25  | 4.95  | 5.66  |
| Down | ENSMUSG00000076236 | -2.70 | 2.61E-08 | Mir682        | miRNA   | 3.86  | 3.52  | 3.65  | 3.45  | 2.13  | 2.62  | 2.35  | 2.44  |
| Down | ENSMUSG00000070133 | -4.49 | 3.00E-08 | Mir434        | miRNA   | 4.09  | 4.01  | 4.05  | 3.69  | 2.00  | 2.00  | 2.69  | 2.00  |
| Down | ENSMUSG00000098606 | -2.65 | 6.12E-08 | Mir6903       | miRNA   | 4.51  | 4.37  | 3.54  | 4.63  | 2.37  | 2.92  | 2.86  | 2.62  |
| Down | ENSMUSG00000065414 | -6.27 | 7.90E-08 | Mir138-1      | miRNA   | 2.65  | 3.11  | 3.54  | 3.33  | 2.00  | 2.00  | 2.00  | 2.00  |
| Down | ENSMUSG00000087855 | -3.97 | 8.10E-08 | Mir432        | miRNA   |       |       |       |       |       |       |       |       |



|      |                    |       |           |            |          |       |       |       |       |       |       |       |       |
|------|--------------------|-------|-----------|------------|----------|-------|-------|-------|-------|-------|-------|-------|-------|
| Down | ENSMUSG0000065597  | -1.75 | 2.59E-07  | Mir124a-1  | miRNA    | 3.91  | 4.50  | 4.63  | 4.19  | 3.60  | 3.22  | 3.07  | 2.44  |
| Down | ENSMUSG00000106203 | -2.63 | 3.27E-07  | Gm44484    | miRNA    | 3.56  | 3.97  | 3.30  | 3.08  | 2.00  | 2.44  | 2.00  | 2.85  |
| Down | ENSMUSG00000098475 | -2.84 | 3.41E-07  | Mir6982    | miRNA    | 3.18  | 3.57  | 3.80  | 3.33  | 2.25  | 2.34  | 2.00  | 2.62  |
| Down | ENSMUSG00000105932 | -1.02 | 6.89E-07  | Mir6925    | miRNA    | 6.13  | 5.74  | 6.35  | 6.09  | 5.38  | 4.76  | 5.05  | 5.35  |
| Down | ENSMUSG00000105399 | -5.24 | 6.70E-06  | Mir1843b   | miRNA    | 2.54  | 2.55  | 2.93  | 2.00  | 2.00  | 2.00  | 2.00  | 2.00  |
| Down | ENSMUSG00000065453 | -6.03 | 9.20E-06  | Mirlet7d   | miRNA    | 3.25  | 2.66  | 3.01  | 3.27  | 2.00  | 2.00  | 2.00  | 2.00  |
| Down | ENSMUSG00000099141 | -5.11 | 1.95E-05  | Mir6352    | miRNA    | 2.43  | 2.86  | 2.42  | 2.86  | 2.00  | 2.00  | 2.00  | 2.00  |
| Down | ENSMUSG00000098589 | -4.30 | 2.03E-05  | Gm27353    | miRNA    | 3.56  | 3.66  | 3.09  | 3.45  | 2.00  | 2.00  | 2.00  | 2.34  |
| Down | ENSMUSG00000098790 | -5.32 | 2.08E-05  | Mir6942    | miRNA    | 2.65  | 2.95  | 2.93  | 2.38  | 2.00  | 2.00  | 2.00  | 2.00  |
| Down | ENSMUSG00000065590 | -5.23 | 2.36E-05  | Mir212     | miRNA    | 2.54  | 2.55  | 2.84  | 2.86  | 2.00  | 2.00  | 2.00  | 2.00  |
| Up   | ENSMUSG00000098973 | 1.06  | 2.38E-05  | Mir6236    | miRNA    | 11.64 | 11.60 | 11.67 | 11.83 | 13.09 | 12.27 | 12.99 | 12.51 |
| Down | ENSMUSG00000098780 | -3.10 | 2.87E-05  | Mir6390    | miRNA    | 4.11  | 4.20  | 4.13  | 4.22  | 2.00  | 3.17  | 2.00  | 2.44  |
| Up   | ENSMUSG00000087943 | 1.32  | 3.08E-05  | Gm24245    | miRNA    | 3.67  | 3.46  | 4.27  | 3.90  | 5.57  | 4.44  | 4.71  | 4.66  |
| Up   | ENSMUSG00000084564 | 1.01  | 4.16E-05  | Mir1895    | miRNA    | 4.62  | 4.41  | 5.05  | 4.89  | 5.97  | 5.56  | 5.60  | 5.47  |
| Down | ENSMUSG00000084523 | -2.36 | 4.34E-05  | Mir1903    | miRNA    | 4.42  | 4.79  | 4.65  | 4.15  | 2.00  | 3.80  | 2.35  | 2.92  |
| Down | ENSMUSG00000088464 | -5.20 | 4.68E-05  | Mir1970    | miRNA    | 2.16  | 2.16  | 2.84  | 3.27  | 2.00  | 2.00  | 2.00  | 2.00  |
| Down | ENSMUSG00000076451 | -1.88 | 5.52E-05  | Mir770     | miRNA    | 6.02  | 5.83  | 6.25  | 5.95  | 2.66  | 4.04  | 5.26  | 4.41  |
| Down | ENSMUSG00000106587 | -3.08 | 8.31E-05  | Gm47311    | miRNA    | 2.65  | 2.95  | 3.09  | 3.15  | 2.25  | 2.12  | 2.00  | 2.24  |
| Down | ENSMUSG00000093232 | -3.07 | 9.58E-05  | Gm24111    | miRNA    | 3.18  | 3.63  | 3.16  | 4.25  | 2.00  | 2.70  | 2.24  | 2.24  |
| Down | ENSMUSG00000104771 | -3.04 | 9.95E-05  | Gm44394    | miRNA    | 3.25  | 3.83  | 3.89  | 2.94  | 2.25  | 2.34  | 2.00  | 2.54  |
| Down | ENSMUSG00000099127 | -3.58 | 1.05E-04  | Gm27320    | miRNA    | 3.91  | 3.25  | 2.42  | 3.01  | 2.00  | 2.00  | 2.45  | 2.12  |
| Down | ENSMUSG00000106463 | -1.90 | 1.40E-04  | Mir1291    | miRNA    | 3.31  | 3.33  | 3.16  | 2.94  | 2.13  | 2.70  | 2.24  | 2.54  |
| Down | ENSMUSG00000105621 | -3.03 | 1.42E-04  | Mirlet7f-1 | miRNA    | 3.10  | 3.57  | 3.16  | 4.25  | 2.00  | 2.70  | 2.24  | 2.24  |
| Down | ENSMUSG00000105814 | -2.41 | 1.46E-04  | Mir703     | miRNA    | 3.50  | 3.68  | 3.49  | 3.78  | 2.57  | 2.00  | 2.63  | 2.62  |
| Down | ENSMUSG00000089214 | -4.52 | 3.48E-04  | Mir1931    | miRNA    | 2.75  | 2.43  | 2.00  | 2.59  | 2.00  | 2.00  | 2.00  | 2.00  |
| Up   | ENSMUSG00000092826 | 1.21  | 3.77E-04  | Gm24197    | miRNA    | 4.39  | 4.58  | 4.49  | 3.65  | 5.25  | 5.66  | 5.20  | 5.23  |
| Down | ENSMUSG00000099045 | -4.63 | 3.83E-04  | Mir6374    | miRNA    | 2.54  | 2.66  | 2.42  | 2.38  | 2.00  | 2.00  | 2.00  | 2.00  |
| Up   | ENSMUSG00000105537 | 1.18  | 4.24E-04  | Gm47292    | miRNA    | 5.38  | 4.67  | 4.70  | 4.42  | 5.77  | 6.22  | 5.81  | 5.73  |
| Down | ENSMUSG00000093238 | -5.47 | 4.42E-04  | Mir9-3     | miRNA    | 3.02  | 2.66  | 2.54  | 2.94  | 2.00  | 2.00  | 2.00  | 2.00  |
| Down | ENSMUSG00000106474 | -4.42 | 4.88E-04  | Gm47294    | miRNA    | 2.54  | 2.16  | 2.54  | 2.49  | 2.00  | 2.00  | 2.00  | 2.00  |
| Up   | ENSMUSG00000098458 | 2.10  | 5.41E-04  | Mir6971    | miRNA    | 2.75  | 2.55  | 2.93  | 2.59  | 4.47  | 4.01  | 3.13  | 3.70  |
| Up   | ENSMUSG00000098954 | 1.78  | 6.08E-04  | Mir7658    | miRNA    | 3.25  | 3.33  | 2.93  | 2.59  | 3.89  | 4.51  | 4.33  | 4.05  |
| Down | ENSMUSG00000094663 | -2.17 | 6.55E-04  | Mir1900    | miRNA    | 4.54  | 4.44  | 4.85  | 4.25  | 2.44  | 2.54  | 2.00  | 3.53  |
| Down | ENSMUSG00000093354 | -1.18 | 8.72E-04  | Mir125b-1  | miRNA    | 3.10  | 2.76  | 2.64  | 2.94  | 2.00  | 2.25  | 2.00  | 2.24  |
| Down | ENSMUSG00000093314 | -3.23 | 1.00E-03  | Mir5136    | miRNA    | 3.67  | 2.76  | 3.09  | 3.55  | 2.00  | 2.44  | 2.00  | 2.34  |
| Down | ENSMUSG00000065475 | -4.09 | 1.17E-03  | Mir27b     | miRNA    | 2.29  | 2.75  | 2.29  | 2.38  | 2.00  | 2.00  | 2.00  | 2.12  |
| Down | ENSMUSG00000106649 | -4.15 | 1.19E-03  | Gm49349    | miRNA    | 3.02  | 2.66  | 3.16  | 2.49  | 2.00  | 2.12  | 2.00  | 2.12  |
| Down | ENSMUSG00000098582 | -3.43 | 1.34E-03  | Mir7080    | miRNA    | 3.67  | 2.86  | 2.64  | 2.49  | 2.00  | 2.00  | 2.00  | 2.44  |
| Down | ENSMUSG00000080406 | -4.00 | 1.50E-03  | Mir1188    | miRNA    | 2.30  | 3.68  | 2.29  | 2.38  | 2.00  | 2.00  | 2.00  | 2.24  |
| Up   | ENSMUSG00000076387 | 1.25  | 1.57E-03  | Mir671     | miRNA    | 3.25  | 3.39  | 3.49  | 3.60  | 4.94  | 4.22  | 3.87  | 4.14  |
| Up   | ENSMUSG00000093075 | 1.86  | 1.70E-03  | Gm25948    | miRNA    | 3.38  | 3.52  | 3.36  | 3.15  | 3.60  | 5.29  | 5.16  | 4.28  |
| Down | ENSMUSG00000092758 | -5.66 | 1.70E-03  | Gm25026    | miRNA    | 2.65  | 2.95  | 3.54  | 2.00  | 2.00  | 2.00  | 2.00  | 2.00  |
| Down | ENSMUSG00000084565 | -1.31 | 2.05E-03  | Mir1901    | miRNA    | 4.77  | 4.74  | 4.27  | 4.50  | 2.90  | 3.69  | 3.13  | 4.25  |
| Up   | ENSMUSG00000105563 | 1.20  | 2.24E-03  | Gm44408    | miRNA    | 3.61  | 2.86  | 3.21  | 4.56  | 3.21  | 4.30  | 3.35  | 4.05  |
| Down | ENSMUSG00000094952 | -4.03 | 2.53E-03  | Mir3070b   | miRNA    | 2.16  | 2.43  | 2.29  | 2.49  | 2.00  | 2.00  | 2.00  | 2.00  |
| Down | ENSMUSG00000093185 | -1.30 | 2.65E-03  | Gm25692    | miRNA    | 5.24  | 5.04  | 5.11  | 5.04  | 3.77  | 4.04  | 3.67  | 4.50  |
| Down | ENSMUSG00000104767 | -4.51 | 2.76E-03  | Gm47271    | miRNA    | 4.54  | 2.00  | 2.67  | 2.84  | 2.00  | 2.00  | 2.00  | 2.00  |
| Down | ENSMUSG00000104589 | -1.01 | 2.87E-03  | Gm44311    | miRNA    | 4.82  | 5.46  | 5.43  | 5.20  | 3.85  | 4.47  | 4.73  | 4.36  |
| Down | ENSMUSG00000106439 | -4.21 | 2.99E-03  | Gm44327    | miRNA    | 2.00  | 2.95  | 2.42  | 2.00  | 2.00  | 2.00  | 2.00  | 2.00  |
| Down | ENSMUSG00000089294 | -5.39 | 3.12E-03  | Mir2139    | miRNA    | 3.31  | 2.43  | 2.93  | 2.14  | 2.00  | 2.00  | 2.00  | 2.00  |
| Down | ENSMUSG00000092867 | -4.23 | 3.22E-03  | Mir3058    | miRNA    | 2.94  | 2.00  | 2.42  | 2.86  | 2.00  | 2.00  | 2.00  | 2.12  |
| Down | ENSMUSG00000065495 | -4.72 | 3.24E-03  | Mir150     | miRNA    | 2.00  | 2.76  | 2.74  | 2.49  | 2.00  | 2.00  | 2.00  | 2.00  |
| Down | ENSMUSG00000094983 | -4.95 | 3.51E-03  | Gm23726    | miRNA    | 3.50  | 3.03  | 3.23  | 3.27  | 2.00  | 2.00  | 2.00  | 2.24  |
| Down | ENSMUSG00000065569 | -3.99 | 3.54E-03  | Mir137     | miRNA    | 2.30  | 2.66  | 2.54  | 2.59  | 2.00  | 2.00  | 2.00  | 2.12  |
| Down | ENSMUSG00000099082 | -4.29 | 4.08E-03  | Mir7036b   | miRNA    | 2.00  | 2.43  | 2.64  | 2.49  | 2.00  | 2.00  | 2.00  | 2.00  |
| Up   | ENSMUSG00000093156 | 1.06  | 4.10E-03  | Mir3076    | miRNA    | 4.51  | 4.79  | 5.02  | 4.37  | 5.32  | 6.13  | 5.49  | 5.42  |
| Down | ENSMUSG00000092985 | -2.84 | 4.14E-03  | Mir378b    | miRNA    | 2.30  | 2.30  | 2.00  | 3.21  | 2.44  | 2.00  | 2.00  | 2.00  |
| Down | ENSMUSG00000098482 | -1.83 | 4.18E-03  | Mir6363    | miRNA    | 4.29  | 4.31  | 4.05  | 4.63  | 3.55  | 2.00  | 3.19  | 3.23  |
| Down | ENSMUSG00000093118 | -4.62 | 4.32E-03  | Mir3083    | miRNA    | 2.54  | 2.30  | 2.54  | 2.59  | 2.00  | 2.00  | 2.00  | 2.00  |
| Down | ENSMUSG00000092906 | -4.50 | 4.54E-03  | Gm25736    | miRNA    | 2.43  | 2.00  | 2.64  | 2.69  | 2.00  | 2.00  | 2.00  | 2.00  |
| Down | ENSMUSG00000090574 | -3.98 | 4.69E-03  | Mir47661   | miRNA    | 2.30  | 2.76  | 2.15  | 2.77  | 2.00  | 2.00  | 2.00  | 2.12  |
| Down | ENSMUSG00000065611 | -4.91 | 5.01E-03  | Mir23a     | miRNA    | 2.30  | 2.95  | 2.64  | 2.38  | 2.00  | 2.00  | 2.00  | 2.00  |
| Down | ENSMUSG00000095842 | -3.91 | 5.14E-03  | Gm24302    | miRNA    | 2.16  | 2.86  | 2.15  | 2.00  | 2.00  | 2.00  | 2.00  | 2.00  |
| Down | ENSMUSG00000105433 | -3.21 | 5.23E-03  | Gm44486    | miRNA    | 2.54  | 2.30  | 3.01  | 2.86  | 2.00  | 2.34  | 2.00  | 2.00  |
| Down | ENSMUSG00000106252 | -4.68 | 6.04E-03  | Mir684-1   | miRNA    | 2.43  | 2.16  | 2.54  | 2.86  | 2.00  | 2.00  | 2.00  | 2.00  |
| Down | ENSMUSG00000077830 | -4.20 | 6.35E-03  | Gm26050    | miRNA    | 2.43  | 2.16  | 2.84  | 2.00  | 2.00  | 2.00  | 2.00  | 2.00  |
| Down | ENSMUSG00000105211 | -4.15 | 6.94E-03  | Gm47302    | miRNA    | 2.16  | 2.16  | 2.42  | 2.69  | 2.00  | 2.00  | 2.00  | 2.00  |
| Down | ENSMUSG00000080441 | -2.60 | 7.62E-03  | Mir1249    | miRNA    | 2.65  | 2.55  | 2.93  | 2.86  | 2.00  | 2.00  | 2.24  | 2.34  |
| Down | ENSMUSG00000098714 | -4.18 | 7.63E-03  | Mir7663    | miRNA    | 2.43  | 2.43  | 2.29  | 2.38  | 2.00  | 2.00  | 2.00  | 2.00  |
| Up   | ENSMUSG00000105468 | 1.66  | 7.95E-03  | Mir6906    | miRNA    | 2.75  | 2.43  | 3.23  | 2.86  | 2.97  | 4.10  | 4.07  | 3.89  |
| Down | ENSMUSG00000065412 | -1.45 | 8.07E-03  | Mir29b-2   | miRNA    | 3.50  | 3.26  | 3.60  | 2.86  | 3.04  | 2.00  | 2.79  | 2.54  |
| Down | ENSMUSG00000093256 | -2.30 | 8.72E-03  | Gm22933    | miRNA    | 2.30  | 2.95  | 2.42  | 3.39  | 2.37  | 2.00  | 2.00  | 2.44  |
| Down | ENSMUSG00000097466 | -3.50 | 9.72E-03  | Mir444     | miRNA    | 2.16  | 2.66  | 2.29  | 2.00  | 2.00  | 2.00  | 2.00  | 2.00  |
| Down | ENSMUSG00000105924 | -3.62 | 9.80E-03  | Gm44359    | miRNA    | 2.54  | 2.86  | 2.84  | 2.27  | 2.00  | 2.00  | 2.00  | 2.00  |
| Down | ENSMUSG00000098613 | -2.94 | 9.97E-03  | Mir6931    | miRNA    | 3.10  | 3.26  | 2.54  | 2.59  | 2.00  | 2.12  | 2.24  | 2.24  |
| Down | ENSMUSG00000098462 | -4.51 | 2.65E-258 | Gm27694    | misc_RNA | 12.67 | 12.51 | 12.20 | 12.72 | 7.95  | 8.08  | 7.67  | 8.41  |
| Down | ENSMUSG00000065037 | -5.17 | 3.52E-183 | Rn7sk      | misc_RNA | 15.36 | 15.23 | 15.17 | 15.20 | 10.01 | 10.18 | 10.04 | 10.07 |
| Down | ENSMUSG00000099250 | -7.48 | 7.83E-70  | Rn7s2      | misc_RNA | 10.88 | 10.56 | 10.40 | 10.35 | 2.74  | 3.61  | 4.00  | 3.89  |
| Down | ENSMUSG00000099021 | -7.27 | 8.83E-51  | Rn7s1      | misc_RNA | 10.85 | 10.53 | 10.35 | 10.30 | 2.66  | 3.56  | 4.40  | 3.89  |
| Down | ENSMUSG00000064945 | -5.07 | 4.05E-40  | Rny3       | misc_RNA | 11.25 | 11.07 | 10.92 | 11.32 | 6.73  | 5.08  | 6.24  | 6.15  |
| Down | ENSMUSG00000098394 | -3.59 | 3.01E-24  | Gm27999    | misc_RNA | 5.26  | 5.40  | 5.67  | 5.55  | 3.38  | 2.24  | 3.12  | 3.24  |
| Down | ENSMUSG00000065701 | -5.61 | 1.63E-23  | Rny1       | misc_RNA | 7.83  | 7.70  | 7.50  | 7.82  | 3.17  | 2.12  | 3.35  | 3.23  |
| Down | ENSMUSG00000098526 | -4.29 | 5.91E-23  | Gm27366    | misc_RNA | 5.17  | 5.17  | 4.89  | 4.87  | 2.74  | 2.62  | 2.40  | 2.34  |
| Down | ENSMUSG00000099136 | -4.20 | 6.91E-23  | Gm27608    | misc_RNA | 5.23  | 5.26  | 5.40  | 5.00  | 2.25  | 2.78  | 2.00  | 2.92  |
| Down | ENSMUSG00000098662 | -3.81 | 1.18E-16  | Gm27582    | misc_RNA | 4.91  | 4.82  | 4.63  | 4.94  | 2.66  | 2.74  | 2.13  | 2.85  |
| Down | ENSMUSG00000092746 | -4.26 | 1.62E-15  | Rn7s6      | misc_RNA | 5.34  | 5.35  | 5.45  | 4.94  | 2.13  | 2.12  | 3.24  | 2.34  |
| Down | ENSMUSG00000097930 | -1.47 | 1.69E-12  | Gm22820    | misc_RNA |       |       |       |       |       |       |       |       |

|      |                    |       |           |          |          |       |       |       |       |       |       |         |       |
|------|--------------------|-------|-----------|----------|----------|-------|-------|-------|-------|-------|-------|---------|-------|
| Down | ENSMUSG00000098395 | -2.18 | 2.93E-11  | Gm27998  | misc_RNA | 5.65  | 5.40  | 5.92  | 5.60  | 2.97  | 4.60  | 3.07    | 4.02  |
| Down | ENSMUSG00000099307 | -2.91 | 2.99E-11  | Gm27419  | misc_RNA | 5.29  | 5.15  | 4.46  | 4.63  | 3.55  | 2.62  | 2.00    | 3.06  |
| Down | ENSMUSG00000064999 | -5.85 | 5.91E-11  | Gm26035  | misc_RNA | 4.15  | 4.37  | 4.27  | 2.00  | 4.42  | 2.00  | 2.35    | 2.00  |
| Down | ENSMUSG00000065824 | -3.23 | 1.03E-10  | Gm26315  | misc_RNA | 5.24  | 4.47  | 5.19  | 5.11  | 2.00  | 3.73  | 2.45    | 2.44  |
| Down | ENSMUSG00000065145 | -7.65 | 6.58E-10  | Vaultrc5 | misc_RNA | 4.84  | 3.88  | 3.23  | 2.00  | 2.00  | 2.00  | 2.00    | 2.00  |
| Down | ENSMUSG00000098543 | -2.95 | 7.79E-10  | Gm27533  | misc_RNA | 4.80  | 5.21  | 4.80  | 4.72  | 3.45  | 2.70  | 2.13    | 2.92  |
| Down | ENSMUSG00000092774 | -6.70 | 6.10E-09  | Gm24195  | misc_RNA | 4.18  | 4.41  | 4.40  | 5.11  | 2.00  | 2.12  | 2.00    | 2.13  |
| Down | ENSMUSG00000098711 | -1.53 | 4.06E-09  | Gm28030  | misc_RNA | 5.55  | 5.66  | 5.56  | 5.66  | 3.85  | 3.73  | 4.85    | 4.43  |
| Down | ENSMUSG00000098974 | -3.13 | 1.76E-08  | Gm27505  | misc_RNA | 4.48  | 4.24  | 4.34  | 4.02  | 2.90  | 2.12  | 2.35    | 2.62  |
| Down | ENSMUSG00000098599 | -2.50 | 3.80E-08  | Gm27627  | misc_RNA | 3.86  | 3.57  | 2.25  | 3.74  | 2.25  | 2.62  | 2.35    | 3.06  |
| Down | ENSMUSG00000098396 | -2.17 | 7.41E-08  | Gm27997  | misc_RNA | 5.41  | 5.21  | 5.38  | 5.46  | 2.74  | 2.44  | 4.24    | 4.17  |
| Down | ENSMUSG00000098793 | -1.82 | 3.17E-07  | Gm27286  | misc_RNA | 5.13  | 4.84  | 5.07  | 5.12  | 3.55  | 2.98  | 4.16    | 3.53  |
| Down | ENSMUSG00000092702 | -5.86 | 5.93E-07  | Gm24514  | misc_RNA | 3.44  | 2.55  | 3.49  | 3.78  | 2.00  | 2.12  | 2.00    | 2.00  |
| Up   | ENSMUSG00000098312 | 3.63  | 1.50E-06  | Gm27953  | misc_RNA | 2.94  | 2.16  | 2.29  | 2.59  | 3.89  | 5.02  | 4.88    | 4.74  |
| Down | ENSMUSG00000099126 | -2.15 | 5.78E-06  | Gm27321  | misc_RNA | 3.67  | 3.57  | 3.75  | 3.39  | 2.66  | 2.92  | 2.00    | 2.44  |
| Down | ENSMUSG00000098986 | -1.75 | 8.58E-06  | Gm28006  | misc_RNA | 4.57  | 5.44  | 5.37  | 5.34  | 4.36  | 3.77  | 3.79    | 2.92  |
| Down | ENSMUSG00000098603 | -1.90 | 1.06E-05  | Gm27798  | misc_RNA | 3.81  | 3.57  | 3.70  | 3.33  | 2.66  | 2.00  | 3.13    | 2.54  |
| Down | ENSMUSG00000084671 | -5.41 | 1.16E-05  | Gm26023  | misc_RNA | 2.94  | 2.43  | 2.64  | 3.01  | 2.00  | 2.00  | 2.00    | 2.00  |
| Down | ENSMUSG00000098659 | -5.44 | 2.21E-05  | Gm27389  | misc_RNA | 2.30  | 2.76  | 2.42  | 3.39  | 2.00  | 2.00  | 2.00    | 2.00  |
| Down | ENSMUSG00000098355 | -2.85 | 7.25E-05  | Gm27553  | misc_RNA | 3.18  | 3.57  | 3.69  | 4.12  | 2.66  | 2.00  | 2.00    | 2.78  |
| Down | ENSMUSG00000064796 | -5.13 | 7.99E-05  | Terc     | misc_RNA | 2.85  | 2.95  | 2.54  | 2.27  | 2.00  | 2.00  | 2.00    | 2.00  |
| Up   | ENSMUSG00000099192 | 1.61  | 9.48E-05  | Gm27373  | misc_RNA | 3.25  | 3.33  | 4.40  | 3.39  | 4.36  | 5.13  | 5.00    | 5.15  |
| Down | ENSMUSG00000088022 | -2.63 | 2.45E-04  | Gm22146  | misc_RNA | 3.56  | 3.68  | 3.16  | 3.55  | 2.00  | 2.53  | 2.00    | 2.78  |
| Down | ENSMUSG00000064684 | -2.66 | 3.19E-04  | Gm24146  | misc_RNA | 3.02  | 3.33  | 3.30  | 3.74  | 2.00  | 2.34  | 2.79    | 2.00  |
| Down | ENSMUSG00000098755 | -5.19 | 3.32E-04  | Gm27651  | misc_RNA | 2.30  | 2.95  | 3.01  | 2.38  | 2.00  | 2.00  | 2.00    | 2.00  |
| Down | ENSMUSG00000098990 | -4.54 | 3.88E-04  | Gm27596  | misc_RNA | 3.02  | 2.00  | 2.54  | 2.14  | 2.00  | 2.00  | 2.00    | 2.00  |
| Down | ENSMUSG00000088849 | -4.63 | 3.98E-04  | Gm26353  | misc_RNA | 2.43  | 2.43  | 2.84  | 2.00  | 2.27  | 2.00  | 2.00    | 2.00  |
| Down | ENSMUSG00000065327 | -4.42 | 5.32E-04  | Gm22058  | misc_RNA | 2.30  | 2.43  | 2.54  | 2.49  | 2.00  | 2.00  | 2.00    | 2.00  |
| Down | ENSMUSG00000065254 | -4.53 | 5.46E-04  | Gm23973  | misc_RNA | 2.16  | 2.55  | 2.84  | 2.00  | 2.27  | 2.00  | 2.00    | 2.00  |
| Down | ENSMUSG00000084597 | -4.42 | 5.58E-04  | Gm22343  | misc_RNA | 2.16  | 2.76  | 2.29  | 2.49  | 2.00  | 2.00  | 2.00    | 2.00  |
| Down | ENSMUSG00000099252 | -5.67 | 6.23E-04  | Gm27265  | misc_RNA | 2.65  | 2.76  | 3.16  | 2.94  | 2.00  | 2.00  | 2.00    | 2.00  |
| Down | ENSMUSG00000093064 | -4.17 | 8.15E-04  | Gm23153  | misc_RNA | 2.65  | 2.43  | 2.74  | 2.49  | 2.00  | 2.13  | 2.00    | 2.00  |
| Down | ENSMUSG00000099169 | -4.73 | 6.25E-04  | Gm25413  | misc_RNA | 3.02  | 3.55  | 3.00  | 2.38  | 2.00  | 2.00  | 2.00    | 2.00  |
| Up   | ENSMUSG00000098963 | 5.14  | 9.59E-04  | Gm27699  | misc_RNA | 3.44  | 3.52  | 3.70  | 4.19  | 3.45  | 4.85  | 5.31    | 4.90  |
| Down | ENSMUSG00000084628 | -4.29 | 1.04E-03  | Gm22613  | misc_RNA | 2.00  | 2.16  | 2.74  | 2.59  | 2.00  | 2.00  | 2.00    | 2.00  |
| Down | ENSMUSG00000098825 | -2.11 | 1.41E-03  | Gm27285  | misc_RNA | 3.44  | 3.11  | 3.49  | 3.15  | 2.00  | 2.00  | 2.45    | 2.99  |
| Down | ENSMUSG00000084537 | -4.17 | 1.45E-03  | Gm25845  | misc_RNA | 2.54  | 2.16  | 2.15  | 2.59  | 2.00  | 2.00  | 2.00    | 2.00  |
| Down | ENSMUSG00000084477 | -4.99 | 1.50E-03  | Gm25780  | misc_RNA | 2.00  | 2.00  | 3.01  | 3.08  | 2.00  | 2.00  | 2.00    | 2.00  |
| Down | ENSMUSG00000098967 | -5.10 | 1.75E-03  | Gm27845  | misc_RNA | 2.43  | 2.55  | 2.84  | 2.77  | 2.00  | 2.00  | 2.00    | 2.00  |
| Down | ENSMUSG00000099081 | -1.18 | 1.86E-03  | Gm27624  | misc_RNA | 5.44  | 5.84  | 5.75  | 5.98  | 4.68  | 4.90  | 4.13    | 5.00  |
| Up   | ENSMUSG00000098846 | 1.43  | 2.17E-03  | Gm27905  | misc_RNA | 3.25  | 3.57  | 3.75  | 3.45  | 3.85  | 4.78  | 4.88    | 4.63  |
| Down | ENSMUSG00000089475 | -4.14 | 2.71E-03  | Gm25363  | misc_RNA | 2.54  | 2.43  | 2.29  | 2.94  | 2.00  | 2.00  | 2.12    | 2.94  |
| Down | ENSMUSG00000098948 | -1.15 | 2.72E-03  | Gm27640  | misc_RNA | 4.95  | 4.50  | 4.78  | 4.12  | 3.45  | 4.04  | 3.30    | 3.99  |
| Down | ENSMUSG00000089446 | -3.73 | 3.37E-03  | Gm22533  | misc_RNA | 2.65  | 2.76  | 2.54  | 2.00  | 2.77  | 2.24  | 2.00    | 2.00  |
| Down | ENSMUSG00000093745 | -1.70 | 3.68E-03  | Gm24420  | misc_RNA | 4.22  | 3.63  | 4.09  | 3.60  | 4.22  | 2.70  | 2.45    | 3.12  |
| Down | ENSMUSG00000099168 | -4.15 | 5.07E-03  | Gm27717  | misc_RNA | 2.30  | 2.30  | 2.15  | 2.69  | 2.00  | 2.00  | 2.00    | 2.00  |
| Down | ENSMUSG00000099235 | -2.30 | 5.15E-03  | Gm27892  | misc_RNA | 4.75  | 5.06  | 5.33  | 4.45  | 4.40  | 2.45  | 2.45    | 2.45  |
| Down | ENSMUSG00000098395 | -2.98 | 5.51E-03  | Gm27500  | misc_RNA | 3.31  | 2.43  | 2.42  | 2.77  | 2.00  | 2.00  | 2.00    | 2.00  |
| Down | ENSMUSG00000088230 | -4.54 | 5.96E-03  | Gm25427  | misc_RNA | 2.00  | 2.30  | 3.16  | 2.14  | 2.00  | 2.00  | 2.00    | 2.00  |
| Down | ENSMUSG00000098466 | -2.23 | 7.79E-03  | Gm27350  | misc_RNA | 2.85  | 2.76  | 2.84  | 2.38  | 2.00  | 2.00  | 2.00    | 2.62  |
| Down | ENSMUSG00000084664 | -3.71 | 8.71E-03  | Gm23213  | misc_RNA | 2.30  | 2.16  | 2.29  | 2.38  | 2.00  | 2.00  | 2.00    | 2.00  |
| Down | ENSMUSG00000088357 | -3.89 | 8.89E-03  | Gm24011  | misc_RNA | 2.16  | 2.55  | 2.15  | 2.38  | 2.00  | 2.00  | 2.00    | 2.00  |
| Down | ENSMUSG00000098805 | -2.49 | 8.96E-03  | Gm27470  | misc_RNA | 2.94  | 2.43  | 3.01  | 2.38  | 2.00  | 2.00  | 2.00    | 2.54  |
| Down | ENSMUSG00000084511 | -3.68 | 9.01E-03  | Gm22481  | misc_RNA | 3.25  | 2.55  | 2.15  | 2.49  | 2.00  | 2.12  | 2.13    | 2.00  |
| Down | ENSMUSG00000064337 | -7.68 | 0.00E+00  | mt-Rnr1  | Mt_rRNA  | 18.29 | 18.29 | 18.55 | 10.87 | 10.87 | 10.65 | 10.64   | 10.86 |
| Down | ENSMUSG00000064339 | -7.59 | 0.00E+00  | mt-Rnr2  | Mt_rRNA  | 19.20 | 19.10 | 19.47 | 19.39 | 11.89 | 11.42 | 11.69   | 11.80 |
| Down | ENSMUSG00000064340 | -6.38 | 4.00E-210 | mt-Tl1   | Mt_rRNA  | 10.64 | 10.78 | 10.82 | 10.82 | 4.63  | 4.35  | 4.73    | 4.79  |
| Down | ENSMUSG00000064350 | -5.77 | 2.21E-142 | mt-Ty    | Mt_rRNA  | 11.25 | 11.49 | 11.49 | 11.51 | 6.17  | 4.89  | 5.60    | 6.12  |
| Down | ENSMUSG00000064369 | -4.93 | 5.16E-94  | mt-Te    | Mt_rRNA  | 11.24 | 11.57 | 11.58 | 11.82 | 6.31  | 6.65  | 6.52    | 7.14  |
| Down | ENSMUSG00000064349 | -5.56 | 6.69E-85  | mt-Tc    | Mt_rRNA  | 10.18 | 10.57 | 10.47 | 10.58 | 5.52  | 4.27  | 4.67    | 5.51  |
| Down | ENSMUSG00000064348 | -6.67 | 9.26E-78  | mt-Tn    | Mt_rRNA  | 10.40 | 10.89 | 10.67 | 11.03 | 3.96  | 4.04  | 3.94    | 5.20  |
| Down | ENSMUSG00000064372 | -6.08 | 6.04E-73  | mt-Tp    | Mt_rRNA  | 10.89 | 11.12 | 11.15 | 11.25 | 5.11  | 4.97  | 5.07    | 5.55  |
| Down | ENSMUSG00000064371 | -5.86 | 6.85E-68  | mt-Tl    | Mt_rRNA  | 10.68 | 10.87 | 10.90 | 11.04 | 5.02  | 5.10  | 5.24    | 5.35  |
| Down | ENSMUSG00000064346 | -6.56 | 6.40E-54  | mt-Tw    | Mt_rRNA  | 10.34 | 10.79 | 10.77 | 11.08 | 4.49  | 3.79  | 3.91    | 5.27  |
| Down | ENSMUSG00000064342 | -6.41 | 1.64E-52  | mt-Tl    | Mt_rRNA  | 9.95  | 10.31 | 10.21 | 10.46 | 3.73  | 4.35  | 3.63    | 4.75  |
| Down | ENSMUSG00000064338 | -6.93 | 1.71E-51  | mt-Tv    | Mt_rRNA  | 10.39 | 10.87 | 10.67 | 10.95 | 3.96  | 4.13  | 2.71    | 5.00  |
| Down | ENSMUSG00000064347 | -6.80 | 2.74E-49  | mt-Ta    | Mt_rRNA  | 10.17 | 10.69 | 10.58 | 10.91 | 3.89  | 3.98  | 3.50    | 4.92  |
| Down | ENSMUSG00000064336 | -7.43 | 6.92E-47  | mt-Tf    | Mt_rRNA  | 8.11  | 8.09  | 8.17  | 8.38  | 3.17  | 2.00  | 2.00    | 2.54  |
| Down | ENSMUSG00000064366 | -5.70 | 1.95E-31  | mt-Tl2   | Mt_rRNA  | 9.61  | 10.03 | 10.04 | 10.30 | 3.89  | 4.63  | 3.94    | 5.20  |
| Down | ENSMUSG00000064365 | -6.00 | 8.69E-31  | mt-Ts2   | Mt_rRNA  | 9.76  | 10.16 | 10.14 | 10.43 | 3.97  | 4.80  | 3.94    | 5.20  |
| Down | ENSMUSG00000064352 | -5.64 | 5.20E-29  | mt-Ts1   | Mt_rRNA  | 5.65  | 5.95  | 5.32  | 6.03  | 2.25  | 2.00  | 2.00    | 2.85  |
| Down | ENSMUSG00000064364 | -5.94 | 2.15E-28  | mt-Th    | Mt_rRNA  | 10.49 | 10.92 | 10.87 | 11.18 | 3.55  | 5.14  | 5.04    | 5.89  |
| Down | ENSMUSG00000064344 | -4.27 | 9.00E-27  | mt-Tm    | Mt_rRNA  | 10.36 | 10.57 | 10.58 | 10.67 | 6.67  | 6.32  | 6.67    | 4.85  |
| Down | ENSMUSG00000064343 | -5.06 | 1.70E-25  | mt-Tq    | Mt_rRNA  | 10.06 | 10.26 | 10.16 | 10.41 | 4.39  | 4.00  | 4.54    | 5.63  |
| Down | ENSMUSG00000064361 | -4.92 | 2.83E-15  | mt-Tr    | Mt_rRNA  | 4.57  | 4.67  | 4.95  | 5.17  | 2.66  | 2.00  | 2.00    | 2.34  |
| Down | ENSMUSG00000064353 | -5.48 | 1.24E-06  | mt-Td    | Mt_rRNA  | 4.54  | 5.30  | 4.49  | 4.87  | 2.25  | 2.34  | 2.00    | 2.12  |
| Up   | CLSTN3             | 2.20  | 7.34E-149 | NA       | NA       | 9.85  | 9.73  | 9.80  | 9.59  | 11.95 | 11.98 | 12.11   | 11.72 |
| Down | NFIX               | -1.56 | 2.61E-143 | NA       | NA       | 11.73 | 11.70 | 11.72 | 11.68 | 10.27 | 10.11 | 10.08   | 10.15 |
| Down | RIN1               | -3.01 | 1.17E-94  | NA       | NA       | 8.56  | 8.63  | 8.87  | 8.60  | 5.58  | 5.10  | 6.24    | 6.24  |
| Up   | DIP2A              | 1.64  | 2.66E-88  | NA       | NA       | 8.64  | 8.65  | 8.61  | 8.42  | 10.27 | 10.17 | 10.27   | 10.15 |
| Down | LIX1               | -2.61 | 7.28E-88  | NA       | NA       | 8.65  | 8.79  | 8.86  | 8.98  | 6.19  | 6.32  | 5.80    | 6.66  |
| Up   | PP1P5K2            | 1.77  | 1.86E-85  | NA       | NA       | 7.86  | 8.11  | 8.05  | 8.03  | 9.63  | 9.82  | 9.98    | 9.63  |
| Down | FTL1               | -1.81 | 1.01E-80  | NA       | NA       | 10.01 | 9.77  | 9.98  | 9.95  | 8.10  | 8.18  | 8.09    | 8.17  |
| Down | GAREM1             | -1.63 | 1.26E-71  | NA       | NA       | 9.13  | 9.26  | 9.21  | 9.10  | 7.66  | 7.52  | 7.34    | 7.70  |
| Down | LRATD2             | -2.76 | 1.23E-59  | NA       | NA       | 7.61  | 7.46  | 7.80  | 7.75  | 5.26  | 4.82  | 4.95    | 5.15  |
| Up   | LRATD1             | 1.12  | 8.26E-57  | NA       | NA       | 9.29  | 9.35  | 9.27  | 9.09  | 10.50 | 10.27 | 10.39   | 10.30 |
| Up   | FLYACH1            | 1.66  | 1.70E-53  | NA       | NA       | 10.51 | 10.51 | 10.42 | 10.33 | 12.21 | 12.11 | 11.99</ |       |

|      |               |       |          |    |    |       |       |       |       |       |       |       |       |
|------|---------------|-------|----------|----|----|-------|-------|-------|-------|-------|-------|-------|-------|
| Down | CDR1OS        | -1.79 | 1.37E-42 | NA | NA | 14.39 | 14.51 | 14.40 | 14.46 | 12.59 | 12.69 | 12.70 | 12.65 |
| Up   | ANAPC2        | 1.14  | 2.12E-41 | NA | NA | 8.66  | 8.67  | 8.55  | 8.46  | 9.82  | 9.63  | 9.68  | 9.73  |
| Down | NRARP         | -3.49 | 3.38E-39 | NA | NA | 6.39  | 6.73  | 6.89  | 3.60  | 6.89  | 4.32  | 2.86  | 3.62  |
| Down | 1-Mar         | -1.75 | 7.73E-39 | NA | NA | 8.86  | 9.00  | 8.76  | 9.00  | 7.27  | 7.05  | 6.72  | 7.56  |
| Up   | 6-Sep         | 1.00  | 2.21E-38 | NA | NA | 8.72  | 8.56  | 8.76  | 8.65  | 9.51  | 9.70  | 9.81  | 9.63  |
| Up   | C1QTNF4       | 1.34  | 2.79E-38 | NA | NA | 8.64  | 8.26  | 8.54  | 8.31  | 9.72  | 9.84  | 9.86  | 9.66  |
| Up   | 4-Sep         | 1.55  | 2.75E-34 | NA | NA | 9.38  | 8.94  | 9.31  | 9.28  | 10.89 | 10.27 | 10.79 | 10.97 |
| Up   | KLC2          | 1.03  | 9.22E-31 | NA | NA | 10.33 | 10.04 | 10.20 | 9.93  | 11.27 | 11.21 | 11.20 | 10.96 |
| Up   | ANKRD26       | 1.15  | 2.12E-28 | NA | NA | 7.37  | 7.43  | 7.31  | 7.38  | 8.74  | 8.54  | 8.31  | 8.41  |
| Down | C030017B01RIK | -1.29 | 7.84E-25 | NA | NA | 7.66  | 7.66  | 7.61  | 7.92  | 6.68  | 6.47  | 6.34  | 6.35  |
| Up   | INSYN2A       | 1.15  | 5.50E-24 | NA | NA | 6.24  | 6.70  | 6.44  | 6.60  | 7.55  | 7.69  | 7.51  | 7.73  |
| Down | PRDM16OS      | -3.47 | 1.17E-23 | NA | NA | 6.74  | 6.56  | 6.28  | 6.61  | 2.25  | 3.87  | 2.93  | 4.41  |
| Down | LYL1          | -1.74 | 1.76E-23 | NA | NA | 6.58  | 6.79  | 6.63  | 6.69  | 4.97  | 4.68  | 5.27  | 5.25  |
| Down | AKT2          | -1.24 | 2.14E-23 | NA | NA | 8.81  | 8.67  | 8.63  | 8.60  | 7.76  | 7.23  | 7.10  | 7.65  |
| Down | MIR100HG      | -1.08 | 4.21E-23 | NA | NA | 7.95  | 8.29  | 8.42  | 8.37  | 7.08  | 7.21  | 7.16  | 7.38  |
| Down | PDGFB         | -1.92 | 8.83E-21 | NA | NA | 6.46  | 6.33  | 6.95  | 6.73  | 4.22  | 4.82  | 5.13  | 5.13  |
| Up   | GM50115       | 1.11  | 3.30E-20 | NA | NA | 8.66  | 8.57  | 8.51  | 8.36  | 9.38  | 9.71  | 9.72  | 9.69  |
| Up   | GM10817       | 1.26  | 5.49E-20 | NA | NA | 7.16  | 6.88  | 7.07  | 6.94  | 8.40  | 8.31  | 8.11  | 8.11  |
| Down | RBM52         | -1.88 | 7.89E-20 | NA | NA | 6.87  | 6.56  | 6.42  | 6.77  | 5.07  | 4.27  | 5.30  | 4.90  |
| Up   | ZFP532        | 1.00  | 1.51E-19 | NA | NA | 9.83  | 9.71  | 9.75  | 9.56  | 10.56 | 10.84 | 10.70 | 10.74 |
| Up   | DIPK1B        | 1.18  | 1.23E-18 | NA | NA | 7.39  | 7.72  | 7.29  | 7.48  | 8.34  | 8.74  | 8.83  | 8.61  |
| Down | GM50394       | -2.37 | 1.22E-17 | NA | NA | 5.78  | 5.59  | 5.78  | 5.53  | 3.23  | 3.69  | 3.35  | 4.31  |
| Up   | PDE9A         | 1.21  | 3.16E-17 | NA | NA | 6.48  | 6.81  | 6.95  | 7.06  | 8.13  | 8.09  | 8.09  | 7.78  |
| Down | TAF1          | -3.33 | 4.39E-17 | NA | NA | 8.38  | 8.42  | 8.51  | 8.42  | 3.45  | 5.57  | 4.71  | 6.06  |
| Down | IKZF4         | -1.18 | 2.92E-16 | NA | NA | 7.18  | 7.18  | 7.14  | 7.20  | 5.94  | 6.18  | 5.73  | 6.27  |
| Up   | EXOC7         | 1.00  | 4.58E-14 | NA | NA | 8.21  | 8.11  | 8.12  | 8.15  | 9.38  | 9.04  | 8.97  | 9.12  |
| Down | RPL41         | -1.41 | 7.00E-14 | NA | NA | 10.32 | 10.31 | 10.31 | 10.53 | 8.92  | 8.98  | 8.97  | 9.01  |
| Up   | FAM114A1      | 1.58  | 1.59E-13 | NA | NA | 5.42  | 5.46  | 5.78  | 5.72  | 7.38  | 6.61  | 7.00  | 7.31  |
| Down | GM31087       | -1.17 | 6.55E-13 | NA | NA | 6.40  | 6.22  | 6.52  | 6.56  | 5.61  | 5.28  | 5.26  | 5.20  |
| Down | GM34299       | 1.35  | 8.72E-13 | NA | NA | 6.35  | 5.72  | 6.38  | 5.79  | 7.09  | 7.56  | 7.66  | 7.17  |
| Up   | MYORG         | -1.65 | 1.67E-11 | NA | NA | 7.02  | 6.92  | 6.81  | 6.96  | 6.05  | 4.78  | 4.85  | 5.44  |
| Down | GM31907       | -1.12 | 2.95E-11 | NA | NA | 7.06  | 7.12  | 7.05  | 6.45  | 6.13  | 5.65  | 5.67  | 6.00  |
| Down | POGLUT3       | -1.26 | 2.04E-10 | NA | NA | 5.90  | 5.90  | 6.26  | 5.07  | 5.07  | 4.40  | 4.94  | 4.94  |
| Up   | GM46637       | 0.98  | 3.27E-10 | NA | NA | 3.86  | 4.24  | 4.24  | 3.94  | 5.82  | 5.82  | 5.69  | 5.65  |
| Down | CEBPA         | -3.19 | 4.12E-10 | NA | NA | 6.16  | 6.48  | 6.40  | 6.67  | 2.47  | 3.22  | 4.79  | 3.29  |
| Down | GM49948       | -2.51 | 8.95E-10 | NA | NA | 9.46  | 9.69  | 9.68  | 9.68  | 5.45  | 7.84  | 5.52  | 7.78  |
| Up   | GLS2          | 1.03  | 1.21E-09 | NA | NA | 6.65  | 5.98  | 6.39  | 6.26  | 7.60  | 7.54  | 7.20  | 6.89  |
| Down | GM50012       | -3.95 | 1.87E-09 | NA | NA | 4.22  | 3.73  | 3.70  | 3.45  | 2.37  | 2.00  | 2.00  | 2.44  |
| Down | RSKR          | -1.72 | 2.15E-09 | NA | NA | 4.32  | 4.56  | 4.75  | 4.65  | 2.74  | 3.38  | 4.00  | 2.78  |
| Down | AOPEP         | -1.46 | 2.27E-09 | NA | NA | 7.25  | 7.27  | 7.84  | 7.49  | 5.38  | 5.63  | 6.76  | 6.12  |
| Down | 1700094D03RIK | -1.38 | 3.41E-09 | NA | NA | 5.61  | 5.72  | 5.11  | 5.41  | 4.31  | 4.47  | 4.19  | 4.20  |
| Down | CAPSL         | -3.00 | 4.48E-09 | NA | NA | 4.45  | 4.24  | 4.68  | 5.11  | 2.74  | 3.11  | 2.00  | 2.85  |
| Down | GM50383       | -1.20 | 5.35E-09 | NA | NA | 5.66  | 5.40  | 5.63  | 5.65  | 4.31  | 4.60  | 4.16  | 4.95  |
| Down | AA387883      | -2.51 | 7.37E-09 | NA | NA | 4.62  | 4.56  | 4.13  | 4.70  | 3.29  | 2.24  | 2.71  | 3.06  |
| Down | GM34567       | -3.04 | 1.02E-08 | NA | NA | 5.23  | 5.21  | 6.23  | 5.74  | 3.45  | 2.70  | 2.00  | 4.11  |
| Down | GM30042       | -3.64 | 1.22E-08 | NA | NA | 2.75  | 3.63  | 4.54  | 3.33  | 2.00  | 2.12  | 2.45  | 2.34  |
| Down | GM3509        | -1.04 | 4.84E-08 | NA | NA | 5.58  | 5.12  | 5.52  | 4.36  | 4.47  | 4.47  | 4.50  | 4.74  |
| Up   | TPRN          | 1.07  | 5.08E-08 | NA | NA | 6.63  | 6.62  | 6.70  | 7.84  | 6.45  | 7.37  | 7.48  | 7.82  |
| Down | FAM228B       | -1.63 | 7.02E-08 | NA | NA | 5.76  | 6.00  | 6.07  | 6.13  | 2.97  | 4.64  | 5.05  | 4.77  |
| Down | GM42064       | -1.13 | 7.96E-08 | NA | NA | 6.57  | 6.71  | 7.24  | 6.80  | 5.79  | 6.22  | 5.45  | 5.54  |
| Down | KIF6          | -1.21 | 1.13E-07 | NA | NA | 5.85  | 5.98  | 5.68  | 6.04  | 5.26  | 4.44  | 4.52  | 4.85  |
| Down | GM49979       | -2.83 | 1.58E-07 | NA | NA | 3.99  | 4.17  | 3.60  | 3.21  | 2.37  | 2.92  | 2.00  | 2.24  |
| Down | GM49883       | -1.50 | 4.02E-07 | NA | NA | 5.08  | 5.06  | 4.95  | 4.87  | 4.10  | 3.11  | 3.90  | 3.89  |
| Down | GM50152       | -6.24 | 5.52E-07 | NA | NA | 2.54  | 3.52  | 3.30  | 3.21  | 2.00  | 2.00  | 2.00  | 2.00  |
| Down | GM50055       | -5.91 | 6.64E-07 | NA | NA | 2.75  | 2.95  | 2.54  | 3.55  | 2.00  | 2.00  | 2.00  | 2.00  |
| Down | GM50024       | -5.58 | 6.64E-07 | NA | NA | 3.31  | 3.68  | 3.93  | 3.69  | 2.00  | 2.00  | 2.24  | 2.00  |
| Down | GM2629        | -2.14 | 8.54E-07 | NA | NA | 4.18  | 4.13  | 4.13  | 4.39  | 2.90  | 2.12  | 3.24  | 2.99  |
| Down | GM50250       | -5.98 | 9.33E-07 | NA | NA | 2.94  | 2.55  | 2.84  | 3.60  | 2.00  | 2.00  | 2.00  | 2.00  |
| Down | GM50268       | -2.41 | 1.04E-06 | NA | NA | 3.81  | 3.26  | 4.17  | 3.55  | 2.97  | 2.00  | 2.54  | 2.44  |
| Down | GM32282       | -2.60 | 1.52E-06 | NA | NA | 4.15  | 4.37  | 3.84  | 4.34  | 2.00  | 2.92  | 3.07  | 2.44  |
| Down | GM50107       | -1.59 | 1.57E-06 | NA | NA | 4.91  | 5.31  | 5.20  | 5.19  | 3.69  | 4.60  | 3.35  | 3.44  |
| Down | GM50273       | -4.61 | 2.17E-06 | NA | NA | 3.50  | 3.46  | 3.75  | 2.86  | 2.00  | 2.00  | 2.00  | 2.34  |
| Down | 9830166K06RIK | -2.98 | 2.25E-06 | NA | NA | 4.67  | 4.61  | 4.70  | 4.65  | 2.00  | 3.69  | 2.13  | 2.44  |
| Down | IRGM2         | -2.11 | 2.51E-06 | NA | NA | 4.03  | 4.74  | 4.43  | 4.58  | 2.74  | 2.78  | 2.86  | 3.57  |
| Down | EEF1A1-PS1    | -2.04 | 2.95E-06 | NA | NA | 3.44  | 3.73  | 3.97  | 3.45  | 2.74  | 2.34  | 2.45  | 2.85  |
| Down | TMEM200B      | -5.39 | 4.65E-06 | NA | NA | 3.31  | 2.86  | 3.23  | 3.01  | 2.00  | 2.00  | 2.00  | 2.02  |
| Down | GM33228       | -2.37 | 6.54E-06 | NA | NA | 4.91  | 5.14  | 4.91  | 5.44  | 2.25  | 4.24  | 2.24  | 3.48  |
| Down | GM50287       | -2.69 | 9.70E-06 | NA | NA | 3.18  | 3.19  | 3.30  | 3.21  | 2.00  | 2.00  | 2.35  | 2.62  |
| Down | ECRG4         | -4.76 | 1.08E-05 | NA | NA | 5.50  | 3.73  | 3.49  | 6.20  | 2.00  | 2.12  | 2.00  | 3.06  |
| Up   | GM1604B       | 2.45  | 1.11E-05 | NA | NA | 2.65  | 2.55  | 3.09  | 3.01  | 4.25  | 3.98  | 5.05  | 4.17  |
| Down | GM41556       | -4.80 | 1.37E-05 | NA | NA | 4.03  | 3.19  | 3.60  | 3.15  | 2.00  | 2.00  | 2.00  | 2.34  |
| Down | VAV1          | -1.56 | 1.74E-05 | NA | NA | 5.36  | 5.60  | 4.93  | 5.35  | 4.03  | 3.73  | 3.30  | 4.70  |
| Down | PLEKH4A       | -1.78 | 2.29E-05 | NA | NA | 4.32  | 5.25  | 4.30  | 3.98  | 2.74  | 3.77  | 3.19  | 3.17  |
| Up   | ZMYND12       | 1.57  | 2.34E-05 | NA | NA | 4.54  | 4.01  | 4.01  | 6.34  | 5.84  | 6.31  | 5.84  | 5.64  |
| Down | H2-M10        | -2.24 | 3.27E-05 | NA | NA | 3.67  | 3.73  | 3.89  | 4.92  | 3.11  | 2.00  | 3.07  | 2.34  |
| Down | GM50335       | -2.50 | 3.42E-05 | NA | NA | 3.44  | 4.01  | 4.09  | 3.50  | 2.00  | 2.00  | 2.71  | 3.06  |
| Down | GM50151       | -2.82 | 3.44E-05 | NA | NA | 2.94  | 3.11  | 2.74  | 3.74  | 2.00  | 2.70  | 2.00  | 2.12  |
| Down | C030013G03RIK | -5.26 | 3.59E-05 | NA | NA | 2.75  | 2.55  | 3.16  | 2.27  | 2.00  | 2.00  | 2.00  | 2.00  |
| Up   | GM50138       | 1.31  | 3.76E-05 | NA | NA | 4.36  | 4.31  | 4.73  | 4.63  | 5.94  | 5.84  | 5.27  | 5.54  |
| Down | GM50321       | -4.05 | 4.35E-05 | NA | NA | 3.18  | 2.95  | 3.36  | 3.69  | 2.00  | 2.00  | 2.00  | 2.24  |
| Down | BCAT2         | -1.15 | 4.47E-05 | NA | NA | 5.21  | 5.72  | 5.63  | 5.55  | 4.36  | 5.28  | 3.54  | 4.72  |
| Down | GM49927       | -5.24 | 4.76E-05 | NA | NA | 2.85  | 2.76  | 2.29  | 2.86  | 2.00  | 2.00  | 2.00  | 2.00  |
| Down | 4930471G03RIK | -5.12 | 5.85E-05 | NA | NA | 2.16  | 2.30  | 3.43  | 2.38  | 2.00  | 2.00  | 2.00  | 2.00  |
| Down | LEF1OS1       | -2.04 | 6.07E-05 | NA | NA | 3.72  | 3.73  | 4.05  | 4.02  | 2.37  | 2.98  | 2.00  | 3.23  |
| Down | GM41760       | -1.20 | 6.11E-05 | NA | NA | 5.19  | 5.49  | 5.22  | 5.00  | 4.70  | 3.91  | 4.13  | 4.02  |
| Down | CCDC183       | -1.40 | 7.24E-05 | NA | NA | 4.72  | 4.17  | 4.54  | 4.15  | 3.23  | 2.98  | 3.24  | 3.95  |
| Down | PRK4          | -1.10 | 1.16E-04 | NA | NA | 6.15  | 6.27  | 6.28  | 6.52  | 4.25  | 5.65  | 5.75  | 5.75  |
| Down | 4930483P17RIK | -4.18 | 1.33E-04 | NA | NA | 3.38  | 2.30  | 3.49  | 2.00  | 2.00  | 2.00  | 2.12  | 2.24  |
| Down | GPR52         | -1.37 | 1.51E-04 | NA | NA | 4.29  | 4.34  | 4.49  | 4.91  | 3.23  | 3.87  | 3.40  | 3.44  |
| Down | CASP16        | -2.72 | 1.65E-04 | NA | NA | 3.10  | 3.11  | 3.01  | 2.94  | 2.00  | 2.53  | 2.00  | 2.24  |

|      |                    |       |          |         |                        |      |      |      |      |      |      |      |      |
|------|--------------------|-------|----------|---------|------------------------|------|------|------|------|------|------|------|------|
| Down | E130008D07RIK      | -1.33 | 2.10E-04 | NA      | NA                     | 4.18 | 5.06 | 5.32 | 5.02 | 3.04 | 4.40 | 3.59 | 4.11 |
| Down | A430019L02RIK      | -1.86 | 2.19E-04 | NA      | NA                     | 3.77 | 3.83 | 4.20 | 3.33 | 3.17 | 2.12 | 2.00 | 3.29 |
| Down | TRIP10             | -1.08 | 2.35E-04 | NA      | NA                     | 5.23 | 5.41 | 5.56 | 5.45 | 4.70 | 4.58 | 4.22 | 4.38 |
| Down | GM49942            | -4.60 | 2.37E-04 | NA      | NA                     | 2.85 | 2.95 | 3.49 | 2.94 | 2.00 | 2.00 | 2.00 | 2.24 |
| Down | 4930592I03RIK      | -3.16 | 2.46E-04 | NA      | NA                     | 2.30 | 2.66 | 3.70 | 3.01 | 2.00 | 2.00 | 2.00 | 2.54 |
| Down | GM31356            | -1.45 | 2.75E-04 | NA      | NA                     | 4.45 | 4.84 | 5.15 | 4.87 | 3.11 | 3.87 | 3.63 | 4.05 |
| Down | MLR                | -2.41 | 3.04E-04 | NA      | NA                     | 3.77 | 3.63 | 3.70 | 3.74 | 4.42 | 2.70 | 2.44 | 2.86 |
| Down | PRRG4              | -1.98 | 3.82E-04 | NA      | NA                     | 4.72 | 4.05 | 4.40 | 4.72 | 2.86 | 2.34 | 2.79 | 4.05 |
| Down | 8030456M14RIK      | -1.92 | 3.84E-04 | NA      | NA                     | 4.07 | 4.24 | 3.23 | 4.65 | 3.04 | 2.24 | 3.30 | 2.92 |
| Down | GM50202            | -4.30 | 4.05E-04 | NA      | NA                     | 2.54 | 2.30 | 2.15 | 2.59 | 2.00 | 2.00 | 2.00 | 2.00 |
| Down | GM36602            | -1.99 | 4.07E-04 | NA      | NA                     | 3.18 | 3.52 | 3.43 | 3.01 | 2.25 | 2.34 | 2.00 | 2.99 |
| Down | AA388235           | -1.36 | 4.79E-04 | NA      | NA                     | 5.00 | 4.91 | 4.80 | 4.87 | 4.39 | 3.77 | 3.07 | 3.74 |
| Down | GM50245            | -5.05 | 4.90E-04 | NA      | NA                     | 2.30 | 2.66 | 3.16 | 3.39 | 2.00 | 2.00 | 2.00 | 2.12 |
| Down | ZAR1L              | -3.09 | 4.93E-04 | NA      | NA                     | 3.10 | 3.26 | 3.54 | 3.45 | 2.00 | 2.62 | 2.00 | 2.24 |
| Down | GM49987            | -1.35 | 5.02E-04 | NA      | NA                     | 4.54 | 4.67 | 4.75 | 5.40 | 3.73 | 3.43 | 3.79 | 4.17 |
| Down | RPL9-PS6           | -1.20 | 5.35E-04 | NA      | NA                     | 5.51 | 5.17 | 5.50 | 5.38 | 5.06 | 4.07 | 3.71 | 4.28 |
| Down | GM41668            | -4.49 | 5.48E-04 | NA      | NA                     | 2.43 | 2.16 | 2.74 | 3.21 | 2.00 | 2.00 | 2.00 | 2.12 |
| Down | GM9902             | -3.14 | 6.13E-04 | NA      | NA                     | 2.30 | 3.11 | 3.60 | 2.69 | 2.00 | 2.00 | 2.00 | 2.54 |
| Down | 1810014P07RIK      | -5.79 | 6.37E-04 | NA      | NA                     | 3.38 | 2.86 | 2.93 | 2.49 | 2.00 | 2.00 | 2.00 | 2.00 |
| Down | 4933424S05RIK      | -1.66 | 6.44E-04 | NA      | NA                     | 3.38 | 3.83 | 3.09 | 3.08 | 2.74 | 3.05 | 2.00 | 2.34 |
| Down | PRDX2-PS1          | -3.83 | 6.88E-04 | NA      | NA                     | 2.30 | 2.86 | 2.30 | 2.59 | 2.13 | 2.00 | 2.00 | 2.24 |
| Down | GM50130            | -4.32 | 7.01E-04 | NA      | NA                     | 3.38 | 2.55 | 2.74 | 2.94 | 2.00 | 2.12 | 2.00 | 2.12 |
| Down | GM49802            | -2.91 | 7.23E-04 | NA      | NA                     | 2.94 | 3.03 | 3.36 | 3.15 | 2.00 | 2.70 | 2.00 | 2.00 |
| Down | GM50300            | -4.43 | 7.35E-04 | NA      | NA                     | 2.00 | 2.55 | 2.93 | 2.14 | 2.00 | 2.00 | 2.00 | 2.00 |
| Down | A230051N06RIK      | -1.58 | 7.85E-04 | NA      | NA                     | 3.91 | 4.34 | 4.34 | 3.97 | 2.53 | 3.90 | 3.00 | 3.34 |
| Down | GM50269            | -2.21 | 9.30E-04 | NA      | NA                     | 3.10 | 3.03 | 3.43 | 3.39 | 2.47 | 2.44 | 2.00 | 2.54 |
| Down | GM49839            | -1.62 | 9.44E-04 | NA      | NA                     | 3.44 | 4.17 | 3.84 | 3.78 | 3.55 | 2.70 | 2.00 | 2.85 |
| Down | GM49968            | -1.87 | 9.48E-04 | NA      | NA                     | 2.94 | 3.57 | 3.30 | 3.21 | 2.00 | 2.62 | 2.00 | 2.99 |
| Down | GM50240            | -1.02 | 1.10E-03 | NA      | NA                     | 5.61 | 5.26 | 5.42 | 5.77 | 4.54 | 3.80 | 4.94 | 4.97 |
| Down | GM30794            | -4.68 | 1.42E-03 | NA      | NA                     | 3.02 | 2.66 | 3.23 | 3.45 | 2.00 | 2.00 | 2.00 | 2.24 |
| Down | GM50048            | -2.28 | 1.52E-03 | NA      | NA                     | 3.99 | 4.34 | 4.17 | 4.53 | 2.00 | 3.33 | 2.00 | 3.39 |
| Down | DIPK2B             | -2.94 | 1.75E-03 | NA      | NA                     | 2.85 | 3.11 | 3.60 | 3.69 | 2.00 | 2.34 | 2.00 | 2.62 |
| Down | GM50403            | -2.22 | 1.98E-03 | NA      | NA                     | 4.54 | 3.82 | 3.80 | 4.24 | 3.05 | 2.00 | 2.13 | 2.44 |
| Down | MFS34B2-PS         | -2.54 | 1.97E-03 | NA      | NA                     | 3.56 | 3.46 | 4.01 | 4.12 | 2.12 | 2.45 | 2.99 | 2.99 |
| Down | GM50230            | -1.10 | 2.11E-03 | NA      | NA                     | 4.36 | 4.50 | 4.49 | 4.55 | 3.77 | 3.80 | 3.67 | 3.29 |
| Down | SMIM38             | -4.82 | 2.12E-03 | NA      | NA                     | 2.94 | 2.16 | 2.74 | 2.27 | 2.00 | 2.00 | 2.00 | 2.00 |
| Down | A530088E08RIK      | -2.93 | 2.21E-03 | NA      | NA                     | 2.94 | 3.46 | 2.64 | 3.39 | 2.00 | 2.24 | 2.54 | 2.00 |
| Down | GM8934             | -2.60 | 2.55E-03 | NA      | NA                     | 2.85 | 3.03 | 3.30 | 3.45 | 2.66 | 2.24 | 2.00 | 2.12 |
| Down | NUP210L            | -1.30 | 2.55E-03 | NA      | NA                     | 4.48 | 4.91 | 5.00 | 4.55 | 3.17 | 4.42 | 2.71 | 4.02 |
| Down | GM50009            | -2.28 | 2.86E-03 | NA      | NA                     | 2.65 | 3.52 | 3.36 | 2.94 | 2.57 | 2.00 | 2.34 | 2.44 |
| Down | GM41653            | -3.22 | 2.91E-03 | NA      | NA                     | 3.56 | 3.68 | 3.89 | 3.45 | 2.47 | 2.00 | 2.24 | 2.44 |
| Up   | D330050116RIK      | 1.02  | 3.14E-03 | NA      | NA                     | 5.06 | 5.21 | 5.45 | 4.70 | 6.54 | 5.42 | 6.23 | 5.80 |
| Down | VMN1R-PS140        | -3.68 | 3.19E-03 | NA      | NA                     | 4.03 | 4.09 | 4.34 | 4.19 | 2.00 | 2.44 | 2.63 | 2.24 |
| Down | GM3720             | -4.04 | 3.26E-03 | NA      | NA                     | 3.18 | 2.76 | 2.54 | 2.69 | 2.00 | 2.00 | 2.00 | 2.24 |
| Down | GM41562            | -4.60 | 3.33E-03 | NA      | NA                     | 2.94 | 3.26 | 2.93 | 3.15 | 2.00 | 2.24 | 2.00 | 2.00 |
| Down | GM6252             | -1.41 | 3.36E-03 | NA      | NA                     | 3.61 | 3.63 | 3.43 | 3.69 | 3.29 | 2.62 | 2.71 | 2.54 |
| Down | GM20161            | -3.03 | 3.37E-03 | NA      | NA                     | 2.00 | 3.33 | 2.84 | 3.65 | 2.00 | 2.62 | 2.00 | 2.00 |
| Down | GM5624             | -4.91 | 3.48E-03 | NA      | NA                     | 3.56 | 3.26 | 2.42 | 3.50 | 2.13 | 2.00 | 2.00 | 2.12 |
| Down | FZD10OS            | -1.63 | 3.49E-03 | NA      | NA                     | 4.48 | 4.34 | 4.27 | 3.89 | 2.44 | 2.71 | 3.66 | 2.71 |
| Up   | GM18649            | 1.04  | 3.72E-03 | NA      | NA                     | 4.39 | 3.83 | 3.93 | 3.90 | 5.25 | 4.83 | 4.04 | 5.13 |
| Down | GM32432            | -1.62 | 3.87E-03 | NA      | NA                     | 3.10 | 3.97 | 3.23 | 3.86 | 2.00 | 3.22 | 2.78 | 2.78 |
| Down | GM20026            | -4.28 | 4.05E-03 | NA      | NA                     | 2.16 | 3.33 | 2.42 | 2.27 | 2.00 | 2.00 | 2.00 | 2.12 |
| Down | GM49940            | -4.18 | 4.05E-03 | NA      | NA                     | 2.94 | 2.00 | 2.00 | 2.38 | 2.00 | 2.00 | 2.00 | 2.00 |
| Down | GM9514             | -2.87 | 4.13E-03 | NA      | NA                     | 2.30 | 3.39 | 2.74 | 2.86 | 2.13 | 2.12 | 2.13 | 2.24 |
| Down | AC163685           | -2.92 | 4.77E-03 | NA      | NA                     | 3.25 | 2.76 | 2.74 | 2.77 | 2.00 | 2.00 | 2.45 | 2.12 |
| Down | GM19076            | -2.94 | 4.82E-03 | NA      | NA                     | 2.85 | 2.86 | 3.01 | 2.27 | 2.00 | 2.00 | 2.00 | 2.44 |
| Down | KCNN4              | -3.09 | 4.99E-03 | NA      | NA                     | 2.65 | 3.92 | 2.64 | 3.69 | 2.00 | 2.44 | 2.00 | 2.44 |
| Down | GM18939            | -2.01 | 5.04E-03 | NA      | NA                     | 2.65 | 3.52 | 3.60 | 3.69 | 2.82 | 2.34 | 2.24 | 2.54 |
| Down | SHOC1              | -2.02 | 5.05E-03 | NA      | NA                     | 3.86 | 4.44 | 3.80 | 4.28 | 3.11 | 2.24 | 2.35 | 3.44 |
| Down | 4930484I04RIK      | -3.01 | 5.32E-03 | NA      | NA                     | 2.75 | 3.76 | 2.29 | 2.69 | 2.00 | 2.00 | 2.35 | 2.00 |
| Down | FAM228A            | -1.43 | 5.34E-03 | NA      | NA                     | 3.99 | 5.14 | 3.93 | 4.70 | 2.37 | 2.85 | 3.24 | 4.48 |
| Down | GM49882            | -5.44 | 5.52E-03 | NA      | NA                     | 3.25 | 2.30 | 3.09 | 2.27 | 2.00 | 2.00 | 2.00 | 2.00 |
| Down | GM19500            | -1.21 | 6.17E-03 | NA      | NA                     | 3.72 | 4.44 | 4.70 | 5.31 | 4.22 | 2.92 | 3.67 | 3.78 |
| Down | GM50256            | -4.31 | 6.44E-03 | NA      | NA                     | 2.30 | 2.00 | 3.01 | 2.14 | 2.00 | 2.00 | 2.00 | 2.00 |
| Down | GM9706             | -4.41 | 6.76E-03 | NA      | NA                     | 2.16 | 2.55 | 2.54 | 2.49 | 2.00 | 2.00 | 2.00 | 2.00 |
| Down | GM33508            | -3.48 | 6.92E-03 | NA      | NA                     | 2.65 | 3.52 | 3.65 | 2.59 | 2.00 | 2.00 | 2.00 | 2.54 |
| Down | TUBA-RS1           | -2.73 | 6.98E-03 | NA      | NA                     | 2.30 | 2.66 | 2.93 | 2.77 | 2.00 | 2.00 | 2.24 | 2.24 |
| Down | PLAUR              | -2.13 | 7.20E-03 | NA      | NA                     | 3.10 | 3.83 | 3.36 | 3.08 | 2.25 | 2.62 | 2.00 | 2.78 |
| Down | GM9926             | -3.22 | 7.40E-03 | NA      | NA                     | 3.61 | 3.19 | 4.13 | 3.55 | 2.66 | 2.44 | 2.00 | 2.00 |
| Down | GM50128            | -2.99 | 7.45E-03 | NA      | NA                     | 4.11 | 3.63 | 3.30 | 4.05 | 2.00 | 2.44 | 2.00 | 2.92 |
| Down | GM36486            | -2.33 | 7.56E-03 | NA      | NA                     | 3.10 | 3.19 | 3.01 | 3.15 | 2.57 | 2.00 | 2.24 | 2.34 |
| Down | NSA2-PS1           | -1.20 | 7.57E-03 | NA      | NA                     | 3.18 | 3.33 | 3.36 | 3.33 | 2.47 | 2.53 | 3.00 | 2.78 |
| Down | VMN2R53            | -2.01 | 7.60E-03 | NA      | NA                     | 5.31 | 4.93 | 5.09 | 5.12 | 3.65 | 3.73 | 4.14 | 4.24 |
| Down | GM49975            | -3.14 | 8.39E-03 | NA      | NA                     | 3.11 | 3.11 | 2.57 | 2.69 | 2.00 | 2.00 | 2.00 | 2.00 |
| Down | RPSA-PS7           | -2.41 | 8.45E-03 | NA      | NA                     | 2.65 | 2.86 | 2.15 | 2.94 | 2.13 | 2.00 | 2.35 | 2.12 |
| Down | GM50278            | -2.78 | 8.51E-03 | NA      | NA                     | 2.94 | 2.30 | 2.15 | 2.69 | 2.00 | 2.00 | 2.35 | 2.00 |
| Down | GM49971            | -1.55 | 8.84E-03 | NA      | NA                     | 3.56 | 4.44 | 3.93 | 3.78 | 2.00 | 3.77 | 2.45 | 3.12 |
| Down | GM2106             | -2.11 | 8.93E-03 | NA      | NA                     | 3.18 | 2.95 | 3.23 | 3.33 | 2.00 | 2.78 | 2.00 | 2.54 |
| Down | GM50393            | -3.42 | 9.02E-03 | NA      | NA                     | 3.25 | 2.76 | 3.16 | 3.33 | 2.00 | 2.24 | 2.13 | 2.24 |
| Down | SLC22A13B          | -2.45 | 9.07E-03 | NA      | NA                     | 2.30 | 3.11 | 3.54 | 3.39 | 2.00 | 2.12 | 2.00 | 2.85 |
| Down | AC107736           | -5.58 | 9.22E-03 | NA      | NA                     | 3.38 | 3.33 | 3.54 | 3.38 | 2.00 | 2.12 | 2.00 | 2.00 |
| Down | GM49972            | -2.34 | 9.53E-03 | NA      | NA                     | 3.02 | 2.43 | 3.09 | 2.77 | 2.00 | 2.12 | 2.00 | 2.62 |
| Down | ENSMUSG0000023341  | -1.54 | 5.01E-03 | Mx2     | polymorphic_pseudogene | 4.03 | 3.97 | 3.93 | 4.55 | 3.47 | 3.47 | 2.71 | 3.57 |
| Up   | ENSMUSG00000045104 | 1.96  | 9.42E-33 | Gm5514  | processed_pseudogene   | 5.88 | 5.77 | 5.40 | 5.75 | 7.62 | 7.68 | 7.67 | 7.33 |
| Down | ENSMUSG00000055497 | -3.00 | 2.05E-26 | Gm9974  | processed_pseudogene   | 5.48 | 5.87 | 5.48 | 5.87 | 3.60 | 2.98 | 2.86 | 3.66 |
| Down | ENSMUSG00000057036 | -1.50 | 3.32E-20 | Gm7536  | processed_pseudogene   | 6.39 | 6.35 | 6.19 | 6.06 | 4.44 | 5.24 | 4.77 | 4.97 |
| Down | ENSMUSG0000003992  | -1.87 | 9.40E-15 | Gm11478 | processed_pseudogene   | 5.10 | 4.77 | 4.73 | 4.65 | 3.60 | 3.73 | 2.85 | 3.24 |
| Down | ENSMUSG00000096449 | -6.57 | 3.60E-12 | Gm4076  | processed_pseudogene   | 4.82 | 4.74 | 4.85 | 5.19 | 2.00 | 2.13 | 2.00 | 2.24 |
| Down | ENSMUSG00000081344 | -2.11 | 7.91E-12 | Gm14303 | processed_pseudogene   | 4.80 | 4.44 | 4.57 | 4.80 | 2.74 | 3.17 | 3.07 | 3.53 |
| Down | ENSMUSG00000114172 | -1.72 | 1.71E-10 | Gm36298 | processed_pseudogene   | 4.82 | 5.47 | 5.61 | 5.25 | 4.16 | 4.01 | 3.50 | 3.85 |

|      |                    |       |          |            |                      |      |      |      |      |      |      |      |      |
|------|--------------------|-------|----------|------------|----------------------|------|------|------|------|------|------|------|------|
| Down | ENSMUSG0000080237  | -2.22 | 2.36E-10 | Gm14239    | processed_pseudogene | 4.45 | 4.34 | 4.01 | 4.12 | 3.04 | 2.98 | 2.63 | 2.70 |
| Down | ENSMUSG00000110816 | -3.46 | 1.30E-09 | Gm19178    | processed_pseudogene | 3.72 | 3.88 | 3.54 | 4.05 | 2.00 | 2.12 | 2.00 | 2.85 |
| Down | ENSMUSG00000046721 | -1.42 | 2.93E-09 | Rpl14-ps1  | processed_pseudogene | 4.70 | 4.47 | 5.04 | 4.74 | 3.40 | 3.47 | 3.94 | 3.74 |
| Down | ENSMUSG00000082536 | -1.40 | 5.08E-09 | Gm13456    | processed_pseudogene | 4.72 | 4.41 | 4.34 | 4.94 | 3.60 | 3.73 | 3.24 | 3.66 |
| Down | ENSMUSG00000067870 | -2.18 | 6.05E-09 | Rpl31-ps8  | processed_pseudogene | 3.99 | 3.92 | 3.89 | 3.74 | 3.07 | 3.05 | 2.45 | 2.70 |
| Up   | ENSMUSG00000083327 | 1.20  | 6.46E-09 | Vcp-rs     | processed_pseudogene | 4.72 | 4.34 | 4.63 | 4.92 | 5.71 | 5.62 | 6.11 | 5.43 |
| Down | ENSMUSG00000082062 | -2.33 | 1.12E-08 | Rpl2-ps    | processed_pseudogene | 4.36 | 3.68 | 4.26 | 4.37 | 2.97 | 2.97 | 2.35 | 3.06 |
| Down | ENSMUSG00000091997 | -4.31 | 1.54E-08 | Gm6511     | processed_pseudogene | 3.25 | 3.68 | 4.09 | 3.69 | 2.13 | 2.00 | 2.00 | 2.44 |
| Down | ENSMUSG00000099764 | -2.59 | 3.85E-08 | Rps10-ps2  | processed_pseudogene | 3.31 | 3.63 | 3.60 | 3.86 | 2.57 | 2.53 | 2.00 | 2.54 |
| Down | ENSMUSG00000081051 | -1.79 | 4.49E-08 | Gm15427    | processed_pseudogene | 4.65 | 5.04 | 5.20 | 4.87 | 3.81 | 3.84 | 3.13 | 3.34 |
| Down | ENSMUSG00000081026 | -2.53 | 4.58E-08 | Gm11855    | processed_pseudogene | 5.19 | 5.23 | 4.70 | 4.53 | 2.25 | 3.61 | 3.07 | 3.17 |
| Down | ENSMUSG00000090516 | -4.07 | 6.17E-08 | Rps11-ps1  | processed_pseudogene | 3.18 | 3.33 | 4.13 | 3.33 | 2.00 | 2.00 | 2.00 | 2.00 |
| Down | ENSMUSG00000082319 | -2.11 | 1.32E-07 | Gm8822     | processed_pseudogene | 3.56 | 4.01 | 4.27 | 3.86 | 2.57 | 2.85 | 2.71 | 2.78 |
| Down | ENSMUSG00000047676 | -1.53 | 1.37E-07 | Rpsa-ps10  | processed_pseudogene | 4.32 | 4.37 | 4.24 | 3.78 | 2.00 | 2.85 | 2.86 | 3.70 |
| Down | ENSMUSG00000081406 | -1.09 | 1.64E-07 | Rps6-ps4   | processed_pseudogene | 5.53 | 5.10 | 5.32 | 5.33 | 4.56 | 4.32 | 3.97 | 4.61 |
| Down | ENSMUSG00000101054 | -5.09 | 1.85E-07 | Gm18406    | processed_pseudogene | 3.18 | 3.97 | 3.97 | 3.74 | 2.00 | 2.00 | 2.00 | 2.00 |
| Down | ENSMUSG00000074800 | -2.37 | 2.97E-07 | Gm4149     | processed_pseudogene | 4.32 | 4.20 | 4.17 | 4.02 | 2.37 | 2.78 | 2.45 | 3.23 |
| Down | ENSMUSG00000115745 | -6.13 | 4.38E-07 | Gm46448    | processed_pseudogene | 2.54 | 3.46 | 3.65 | 2.49 | 2.00 | 2.00 | 2.00 | 2.00 |
| Down | ENSMUSG00000080989 | -1.70 | 4.53E-07 | Gm14048    | processed_pseudogene | 5.80 | 6.24 | 6.64 | 6.43 | 4.92 | 4.90 | 4.71 | 4.48 |
| Down | ENSMUSG00000104103 | -1.99 | 6.75E-07 | Gm9517     | processed_pseudogene | 3.77 | 4.01 | 3.65 | 3.86 | 2.74 | 2.62 | 2.79 | 2.70 |
| Down | ENSMUSG00000068396 | 2.44  | 7.19E-07 | Rpl34-ps1  | processed_pseudogene | 3.02 | 3.63 | 3.65 | 3.15 | 2.13 | 2.62 | 2.13 | 2.54 |
| Up   | ENSMUSG00000107062 | 1.09  | 7.34E-07 | Gm43580    | processed_pseudogene | 5.23 | 5.43 | 5.29 | 5.64 | 6.31 | 6.58 | 6.66 | 6.06 |
| Down | ENSMUSG00000081788 | -1.96 | 7.77E-07 | Gm5898     | processed_pseudogene | 3.67 | 4.27 | 3.60 | 3.74 | 2.97 | 2.53 | 2.63 | 2.78 |
| Down | ENSMUSG00000087233 | -3.13 | 8.16E-07 | Gm43213    | processed_pseudogene | 2.94 | 3.11 | 3.60 | 3.69 | 2.00 | 2.00 | 2.45 | 2.44 |
| Down | ENSMUSG00000083536 | -5.78 | 1.22E-06 | Gm15808    | processed_pseudogene | 2.75 | 3.39 | 2.75 | 3.16 | 2.00 | 2.00 | 2.27 | 2.00 |
| Down | ENSMUSG00000105408 | -5.95 | 1.83E-06 | Gm7285     | processed_pseudogene | 2.75 | 2.55 | 3.43 | 3.21 | 2.00 | 2.00 | 2.00 | 2.00 |
| Down | ENSMUSG00000082561 | -5.72 | 2.07E-06 | Gm15580    | processed_pseudogene | 2.65 | 3.26 | 2.84 | 2.86 | 2.00 | 2.00 | 2.00 | 2.00 |
| Down | ENSMUSG00000104181 | -4.66 | 2.11E-06 | Gm8850     | processed_pseudogene | 3.44 | 3.26 | 3.89 | 3.08 | 2.00 | 2.12 | 2.13 | 2.12 |
| Down | ENSMUSG00000083500 | -2.79 | 2.92E-06 | Gm15470    | processed_pseudogene | 3.61 | 4.34 | 4.27 | 4.28 | 2.00 | 3.11 | 2.35 | 2.62 |
| Down | ENSMUSG00000084408 | -3.25 | 3.09E-06 | Gm11870    | processed_pseudogene | 3.72 | 3.33 | 3.01 | 3.69 | 2.00 | 2.00 | 2.00 | 2.00 |
| Down | ENSMUSG00000059461 | -1.50 | 3.68E-06 | Gm7331     | processed_pseudogene | 3.67 | 4.01 | 3.97 | 3.69 | 2.82 | 2.85 | 2.79 | 3.06 |
| Down | ENSMUSG00000087632 | -6.07 | 4.08E-06 | Gm6058     | processed_pseudogene | 3.10 | 2.43 | 3.49 | 3.15 | 2.00 | 2.00 | 2.00 | 2.00 |
| Down | ENSMUSG00000098143 | -5.42 | 4.41E-06 | Gm2937     | processed_pseudogene | 2.85 | 2.86 | 2.54 | 2.95 | 2.00 | 2.00 | 2.00 | 2.00 |
| Down | ENSMUSG00000080966 | -2.44 | 5.30E-06 | Gm6206     | processed_pseudogene | 2.94 | 2.86 | 3.43 | 3.15 | 2.00 | 2.12 | 2.00 | 2.00 |
| Down | ENSMUSG00000066543 | -4.62 | 5.34E-06 | Rpl17-ps9  | processed_pseudogene | 3.77 | 3.03 | 3.36 | 3.45 | 2.13 | 2.00 | 2.00 | 2.24 |
| Down | ENSMUSG00000047643 | -4.44 | 5.39E-06 | Gm5454     | processed_pseudogene | 3.25 | 3.03 | 3.43 | 3.50 | 2.13 | 2.00 | 2.13 | 2.12 |
| Down | ENSMUSG00000075469 | -3.05 | 5.69E-06 | Gm17205    | processed_pseudogene | 2.94 | 2.95 | 3.43 | 3.45 | 2.00 | 2.00 | 2.24 | 2.54 |
| Down | ENSMUSG00000046952 | -2.78 | 6.65E-06 | Gm5815     | processed_pseudogene | 3.99 | 3.57 | 4.17 | 3.90 | 2.13 | 3.11 | 2.24 | 2.24 |
| Down | ENSMUSG00000083853 | -5.38 | 7.07E-06 | Gm15696    | processed_pseudogene | 2.85 | 2.86 | 3.01 | 2.27 | 2.00 | 2.00 | 2.00 | 2.00 |
| Down | ENSMUSG00000101135 | -5.54 | 7.11E-06 | Gm17981    | processed_pseudogene | 3.38 | 2.43 | 2.84 | 2.49 | 2.00 | 2.00 | 2.00 | 2.00 |
| Down | ENSMUSG00000083728 | -3.68 | 7.70E-06 | Gm13854    | processed_pseudogene | 3.67 | 3.19 | 3.54 | 2.59 | 2.00 | 2.34 | 2.00 | 2.24 |
| Down | ENSMUSG00000090671 | -1.31 | 7.98E-06 | Gm5067     | processed_pseudogene | 5.00 | 5.52 | 5.31 | 5.40 | 3.87 | 3.73 | 4.65 | 4.36 |
| Down | ENSMUSG00000113869 | -3.06 | 9.60E-06 | Gm48869    | processed_pseudogene | 3.61 | 3.26 | 3.23 | 3.60 | 2.00 | 2.12 | 2.00 | 2.78 |
| Down | ENSMUSG00000090001 | -5.45 | 1.07E-05 | Gm9719     | processed_pseudogene | 2.16 | 2.55 | 2.93 | 3.27 | 2.00 | 2.00 | 2.00 | 2.00 |
| Down | ENSMUSG00000113357 | -5.21 | 1.13E-05 | Gm19195    | processed_pseudogene | 2.65 | 2.95 | 3.54 | 2.77 | 2.00 | 2.00 | 2.00 | 2.00 |
| Down | ENSMUSG00000084139 | -5.30 | 1.20E-05 | Gm12322    | processed_pseudogene | 2.43 | 2.76 | 2.84 | 2.86 | 2.00 | 2.00 | 2.12 | 2.12 |
| Down | ENSMUSG00000111909 | -5.11 | 1.47E-05 | Gm18670    | processed_pseudogene | 2.65 | 3.03 | 2.64 | 3.39 | 2.00 | 2.00 | 2.00 | 2.00 |
| Down | ENSMUSG00000062353 | -1.25 | 1.52E-05 | Gm15772    | processed_pseudogene | 4.67 | 3.83 | 3.97 | 4.02 | 3.23 | 3.47 | 3.35 | 3.12 |
| Down | ENSMUSG00000089987 | -5.46 | 1.60E-05 | Gpx2-ps1   | processed_pseudogene | 2.16 | 2.95 | 2.93 | 3.01 | 2.00 | 2.00 | 2.00 | 2.00 |
| Down | ENSMUSG00000082465 | -5.35 | 1.70E-05 | Rps6-ps3   | processed_pseudogene | 2.85 | 2.16 | 3.01 | 2.86 | 2.00 | 2.00 | 2.00 | 2.00 |
| Down | ENSMUSG00000081957 | -5.35 | 1.79E-05 | Akl32-ps   | processed_pseudogene | 2.75 | 2.55 | 2.54 | 3.08 | 2.00 | 2.00 | 2.00 | 2.00 |
| Down | ENSMUSG00000100901 | -5.48 | 1.96E-05 | Gm18829    | processed_pseudogene | 2.65 | 2.30 | 3.93 | 3.21 | 2.13 | 2.00 | 2.00 | 2.00 |
| Down | ENSMUSG00000089828 | -5.13 | 2.14E-05 | Gm16300    | processed_pseudogene | 3.18 | 3.11 | 2.84 | 2.00 | 2.00 | 2.00 | 2.12 | 2.00 |
| Down | ENSMUSG00000113491 | -2.04 | 2.39E-05 | Gm19221    | processed_pseudogene | 3.81 | 4.27 | 3.84 | 4.02 | 2.47 | 3.22 | 2.63 | 2.70 |
| Down | ENSMUSG00000098039 | -3.70 | 2.43E-05 | Gm26925    | processed_pseudogene | 2.54 | 3.68 | 2.64 | 3.33 | 2.00 | 2.00 | 2.00 | 2.44 |
| Down | ENSMUSG00000082658 | -2.15 | 2.43E-05 | Fau-ps2    | processed_pseudogene | 7.12 | 7.27 | 7.33 | 7.20 | 4.13 | 5.56 | 4.87 | 5.75 |
| Down | ENSMUSG00000110940 | -5.69 | 2.62E-05 | Gm47496    | processed_pseudogene | 3.10 | 3.39 | 2.29 | 2.59 | 2.00 | 2.00 | 2.00 | 2.00 |
| Down | ENSMUSG00000113456 | -5.14 | 2.66E-05 | Gm30738    | processed_pseudogene | 3.38 | 2.66 | 3.16 | 2.59 | 2.00 | 2.00 | 2.13 | 2.00 |
| Down | ENSMUSG00000084024 | -4.18 | 2.91E-05 | Gm15937    | processed_pseudogene | 2.94 | 3.26 | 3.01 | 3.39 | 2.00 | 2.12 | 2.24 | 2.00 |
| Down | ENSMUSG00000093621 | -1.21 | 2.97E-05 | Gm14586    | processed_pseudogene | 4.15 | 4.09 | 3.90 | 4.19 | 3.60 | 3.38 | 3.13 | 2.78 |
| Down | ENSMUSG00000102254 | -3.50 | 2.98E-05 | Gm7496     | processed_pseudogene | 2.65 | 3.19 | 3.23 | 3.55 | 2.00 | 2.34 | 2.00 | 2.24 |
| Down | ENSMUSG00000115632 | -2.41 | 2.99E-05 | Gm17922    | processed_pseudogene | 3.10 | 4.09 | 4.01 | 3.45 | 2.00 | 2.70 | 2.45 | 2.78 |
| Down | ENSMUSG00000113392 | -5.29 | 3.22E-05 | Gm36262    | processed_pseudogene | 2.85 | 2.43 | 2.64 | 2.94 | 2.00 | 2.00 | 2.00 | 2.00 |
| Down | ENSMUSG00000112583 | -6.52 | 3.26E-05 | Gm4930     | processed_pseudogene | 3.18 | 3.26 | 3.54 | 3.39 | 2.00 | 2.00 | 2.00 | 2.00 |
| Down | ENSMUSG00000080180 | -5.17 | 3.28E-05 | Gm17235    | processed_pseudogene | 2.65 | 2.16 | 3.09 | 2.69 | 2.00 | 2.00 | 2.00 | 2.00 |
| Down | ENSMUSG00000066315 | -2.72 | 3.36E-05 | Gm12918    | processed_pseudogene | 2.85 | 3.03 | 3.30 | 3.33 | 2.74 | 2.12 | 2.00 | 2.00 |
| Down | ENSMUSG00000111425 | -5.09 | 3.47E-05 | Gm47324    | processed_pseudogene | 2.00 | 3.57 | 2.84 | 3.01 | 2.00 | 2.00 | 2.12 | 2.00 |
| Down | ENSMUSG00000105388 | -1.56 | 3.56E-05 | Rpl36a-ps2 | processed_pseudogene | 3.72 | 4.24 | 3.54 | 4.05 | 2.34 | 2.34 | 2.54 | 3.44 |
| Down | ENSMUSG00000083777 | -5.44 | 3.75E-05 | Gm13361    | processed_pseudogene | 3.10 | 2.66 | 3.16 | 3.50 | 2.00 | 2.00 | 2.13 | 2.00 |
| Down | ENSMUSG00000081424 | -5.57 | 4.10E-05 | Gm14774    | processed_pseudogene | 2.54 | 2.30 | 2.42 | 3.65 | 2.00 | 2.00 | 2.13 | 2.00 |
| Down | ENSMUSG00000089993 | -3.15 | 4.74E-05 | Gm5822     | processed_pseudogene | 3.61 | 2.95 | 3.65 | 3.21 | 2.00 | 2.78 | 2.00 | 2.00 |
| Down | ENSMUSG00000082148 | -3.23 | 4.90E-05 | Gm12266    | processed_pseudogene | 2.75 | 3.33 | 2.54 | 3.39 | 2.00 | 2.24 | 2.12 | 2.12 |
| Down | ENSMUSG00000106314 | -2.30 | 5.23E-05 | Pfkfb2     | processed_pseudogene | 3.38 | 4.05 | 4.52 | 4.52 | 2.37 | 2.34 | 2.63 | 3.17 |
| Down | ENSMUSG00000080957 | 2.53  | 5.57E-05 | Gm15739    | processed_pseudogene | 2.94 | 3.26 | 3.09 | 3.21 | 2.00 | 2.00 | 2.24 | 2.00 |
| Down | ENSMUSG00000081270 | -2.58 | 5.65E-05 | Gm11653    | processed_pseudogene | 2.75 | 3.52 | 3.30 | 2.94 | 2.00 | 2.53 | 2.00 | 2.44 |
| Down | ENSMUSG00000084137 | -5.12 | 5.69E-05 | Gm9085     | processed_pseudogene | 2.75 | 2.76 | 3.16 | 3.15 | 2.00 | 2.00 | 2.00 | 2.12 |
| Down | ENSMUSG00000093716 | -3.71 | 5.84E-05 | Gm19815    | processed_pseudogene | 3.10 | 2.55 | 3.01 | 3.65 | 2.37 | 2.00 | 2.00 | 2.12 |
| Down | ENSMUSG00000091786 | -5.55 | 6.70E-05 | Gm8425     | processed_pseudogene | 3.31 | 2.86 | 2.74 | 2.27 | 2.00 | 2.00 | 2.00 | 2.00 |
| Down | ENSMUSG00000080950 | -4.67 | 6.91E-05 | Gm7278     | processed_pseudogene | 2.94 | 3.26 | 3.30 | 2.94 | 2.00 | 2.00 | 2.24 | 2.00 |
| Down | ENSMUSG00000060438 | -3.37 | 6.97E-05 | Rps10-ps1  | processed_pseudogene | 2.85 | 3.11 | 3.16 | 2.69 | 2.13 | 2.24 | 2.00 | 2.12 |
| Down | ENSMUSG00000083353 | -5.47 | 7.59E-05 | Gm12540    | processed_pseudogene | 2.85 | 3.11 | 2.00 | 3.01 | 2.00 | 2.00 | 2.00 | 2.00 |
| Up   | ENSMUSG00000094597 | 1.93  | 7.63E-05 | Gm4810     | processed_pseudogene | 3.50 | 3.88 | 3.93 | 3.39 | 4.82 | 5.33 | 5.47 | 5.29 |
| Down | ENSMUSG00000114184 | -4.89 | 7.86E-05 | Gm7143     | processed_pseudogene | 2.85 | 2.66 | 2.29 | 2.49 | 2.00 | 2.00 | 2.00 | 2.00 |
| Down | ENSMUSG00000081339 | -3.80 | 8.11E-05 | Gm16044    | processed_pseudogene | 2.43 | 3.83 | 2.74 | 3.33 | 2.13 | 2.00 | 2.00 | 2.34 |
| Down | ENSMUSG00000108078 | -4.95 | 8.23E-05 | Gm8744     | processed_pseudogene | 3.77 | 4.01 | 3.60 | 4.34 | 2.37 | 2.00 | 2.00 | 2.12 |
| Down | ENSMUSG00000101301 | -5.30 | 8.27E-05 | Gm29214    | processed_pseudogene | 2.   |      |      |      |      |      |      |      |

|      |                    |       |          |            |                      |      |      |      |      |      |      |      |      |
|------|--------------------|-------|----------|------------|----------------------|------|------|------|------|------|------|------|------|
| Down | ENSMUSG0000011512  | -5.04 | 1.11E-04 | Gm17853    | processed_pseudogene | 2.65 | 2.55 | 2.74 | 2.59 | 2.00 | 2.00 | 2.00 | 2.00 |
| Down | ENSMUSG00000116824 | -5.12 | 1.12E-04 | Gm18021    | processed_pseudogene | 2.16 | 3.57 | 2.64 | 3.15 | 2.00 | 2.00 | 2.00 | 2.12 |
| Down | ENSMUSG00000080780 | -2.99 | 1.13E-04 | Gm11252    | processed_pseudogene | 2.85 | 3.46 | 2.64 | 3.86 | 2.00 | 2.00 | 2.13 | 2.70 |
| Down | ENSMUSG00000108971 | -6.26 | 1.14E-04 | Gm18210    | processed_pseudogene | 3.61 | 3.33 | 2.64 | 3.01 | 2.00 | 2.00 | 2.00 | 2.00 |
| Down | ENSMUSG00000081492 | -3.22 | 1.16E-04 | Gm9311     | processed_pseudogene | 3.50 | 3.33 | 2.74 | 2.38 | 2.25 | 2.00 | 2.00 | 2.34 |
| Up   | ENSMUSG00000083679 | 1.32  | 1.17E-04 | Gm12892    | processed_pseudogene | 3.25 | 2.95 | 2.84 | 3.08 | 4.10 | 3.77 | 3.75 | 3.81 |
| Down | ENSMUSG00000114903 | -1.85 | 1.20E-04 | Gm916      | processed_pseudogene | 3.21 | 3.83 | 3.49 | 3.08 | 2.00 | 2.00 | 2.44 | 2.44 |
| Down | ENSMUSG00000112550 | -1.87 | 1.23E-04 | Gm6827     | processed_pseudogene | 3.25 | 3.19 | 3.25 | 3.54 | 2.00 | 2.70 | 3.00 | 2.70 |
| Down | ENSMUSG00000082503 | -2.98 | 1.31E-04 | Gm12229    | processed_pseudogene | 3.10 | 2.95 | 2.93 | 3.21 | 2.00 | 2.44 | 2.00 | 2.24 |
| Down | ENSMUSG00000100770 | -5.04 | 1.33E-04 | Gm28466    | processed_pseudogene | 2.65 | 2.95 | 2.00 | 2.77 | 2.00 | 2.00 | 2.00 | 2.00 |
| Down | ENSMUSG00000082554 | -4.82 | 1.35E-04 | Gm15806    | processed_pseudogene | 2.16 | 3.39 | 2.93 | 2.59 | 2.00 | 2.00 | 2.00 | 2.12 |
| Down | ENSMUSG00000083827 | -5.01 | 1.39E-04 | Gm15712    | processed_pseudogene | 2.94 | 3.39 | 3.70 | 3.08 | 2.00 | 2.00 | 2.00 | 2.24 |
| Down | ENSMUSG00000080759 | -4.65 | 1.41E-04 | Gm15573    | processed_pseudogene | 3.10 | 2.55 | 2.93 | 3.38 | 2.00 | 2.12 | 2.00 | 2.00 |
| Down | ENSMUSG0000011515  | -4.83 | 1.43E-04 | Gm5055     | processed_pseudogene | 3.10 | 2.76 | 3.70 | 3.08 | 2.00 | 2.12 | 2.00 | 2.12 |
| Down | ENSMUSG00000103098 | -2.84 | 1.45E-04 | Gm37559    | processed_pseudogene | 3.18 | 3.57 | 2.64 | 3.27 | 2.13 | 2.00 | 2.00 | 2.70 |
| Down | ENSMUSG00000081865 | -2.71 | 1.49E-04 | Gm15484    | processed_pseudogene | 2.75 | 3.46 | 3.16 | 4.19 | 2.90 | 2.12 | 2.00 | 2.24 |
| Down | ENSMUSG00000098101 | -3.29 | 1.51E-04 | Gm27006    | processed_pseudogene | 3.81 | 3.03 | 2.64 | 3.15 | 2.00 | 2.00 | 2.00 | 2.62 |
| Down | ENSMUSG00000083104 | -4.96 | 1.70E-04 | Gm12917    | processed_pseudogene | 2.65 | 2.43 | 2.64 | 2.69 | 2.00 | 2.00 | 2.00 | 2.00 |
| Down | ENSMUSG00000083377 | -4.87 | 1.70E-04 | Gm12653    | processed_pseudogene | 2.30 | 2.43 | 2.54 | 2.94 | 2.00 | 2.00 | 2.00 | 2.00 |
| Down | ENSMUSG00000115602 | -4.48 | 1.70E-04 | Gm7308     | processed_pseudogene | 3.61 | 2.76 | 2.64 | 2.86 | 2.00 | 2.00 | 2.00 | 2.24 |
| Down | ENSMUSG00000106833 | -4.88 | 1.84E-04 | Gm42739    | processed_pseudogene | 2.16 | 2.00 | 3.16 | 2.69 | 2.00 | 2.00 | 2.00 | 2.00 |
| Down | ENSMUSG00000114653 | -2.50 | 1.92E-04 | Gm18398    | processed_pseudogene | 2.85 | 3.03 | 3.23 | 3.27 | 2.00 | 2.00 | 2.00 | 2.85 |
| Down | ENSMUSG00000081307 | -5.78 | 2.01E-04 | Gm13627    | processed_pseudogene | 3.72 | 3.26 | 2.84 | 3.29 | 2.00 | 2.00 | 2.00 | 2.12 |
| Down | ENSMUSG00000104651 | -2.00 | 2.06E-04 | Gm21168    | processed_pseudogene | 3.56 | 3.97 | 3.75 | 4.02 | 2.90 | 2.44 | 2.63 | 2.85 |
| Down | ENSMUSG00000084416 | -1.83 | 2.06E-04 | Rpl10a-ps1 | processed_pseudogene | 3.31 | 3.11 | 3.01 | 3.33 | 2.66 | 2.62 | 2.24 | 2.24 |
| Down | ENSMUSG00000081608 | -2.95 | 2.08E-04 | Gm16210    | processed_pseudogene | 2.75 | 3.57 | 3.43 | 2.69 | 2.00 | 2.70 | 2.00 | 2.00 |
| Down | ENSMUSG00000059571 | -4.88 | 2.11E-04 | Gm16218    | processed_pseudogene | 2.75 | 2.43 | 2.42 | 2.69 | 2.00 | 2.00 | 2.00 | 2.00 |
| Down | ENSMUSG00000083953 | -4.44 | 2.15E-04 | Gm14049    | processed_pseudogene | 2.54 | 2.76 | 3.36 | 3.15 | 2.00 | 2.00 | 2.00 | 2.24 |
| Down | ENSMUSG00000084291 | -3.62 | 2.20E-04 | Gm6654     | processed_pseudogene | 3.31 | 2.55 | 3.23 | 3.25 | 2.00 | 2.00 | 2.00 | 2.24 |
| Down | ENSMUSG00000082786 | -5.03 | 2.26E-04 | Gm9013     | processed_pseudogene | 2.16 | 2.76 | 2.74 | 2.77 | 2.00 | 2.00 | 2.00 | 2.00 |
| Down | ENSMUSG00000081929 | -4.89 | 2.33E-04 | Rps11-ps2  | processed_pseudogene | 2.30 | 3.03 | 2.29 | 2.59 | 2.00 | 2.00 | 2.00 | 2.00 |
| Down | ENSMUSG00000115959 | -4.95 | 2.34E-04 | Gm18494    | processed_pseudogene | 3.02 | 2.55 | 3.09 | 2.86 | 2.00 | 2.12 | 2.00 | 2.00 |
| Down | ENSMUSG00000091771 | -3.65 | 2.34E-04 | Gm15381    | processed_pseudogene | 2.75 | 2.95 | 3.16 | 2.59 | 2.00 | 2.00 | 2.00 | 2.24 |
| Down | ENSMUSG00000101501 | -2.52 | 2.42E-04 | Rps27-ps1  | processed_pseudogene | 4.42 | 3.63 | 4.42 | 3.94 | 2.00 | 2.00 | 2.62 | 2.62 |
| Down | ENSMUSG00000113898 | -2.84 | 2.47E-04 | Gm19144    | processed_pseudogene | 2.54 | 3.26 | 3.65 | 2.69 | 2.25 | 2.24 | 2.00 | 2.34 |
| Down | ENSMUSG00000082711 | -4.91 | 2.56E-04 | Gm12987    | processed_pseudogene | 2.54 | 3.03 | 2.29 | 2.38 | 2.00 | 2.00 | 2.00 | 2.00 |
| Down | ENSMUSG00000083795 | -4.61 | 2.57E-04 | Gm15670    | processed_pseudogene | 2.54 | 2.43 | 2.15 | 2.77 | 2.00 | 2.00 | 2.00 | 2.00 |
| Down | ENSMUSG00000110124 | -1.61 | 2.68E-04 | Gm4247     | processed_pseudogene | 3.95 | 4.17 | 3.75 | 3.69 | 3.11 | 2.62 | 2.93 | 2.99 |
| Down | ENSMUSG00000067344 | -1.77 | 2.71E-04 | Rps25-ps1  | processed_pseudogene | 2.94 | 3.19 | 3.30 | 3.39 | 2.57 | 2.12 | 2.45 | 2.70 |
| Down | ENSMUSG00000063314 | -4.78 | 2.74E-04 | Gm12657    | processed_pseudogene | 2.85 | 3.46 | 2.42 | 2.13 | 2.00 | 2.00 | 2.00 | 2.00 |
| Down | ENSMUSG00000113677 | -5.84 | 2.76E-04 | Gm48487    | processed_pseudogene | 2.75 | 3.33 | 3.70 | 3.55 | 2.00 | 2.00 | 2.00 | 2.12 |
| Up   | ENSMUSG00000080935 | 1.30  | 2.84E-04 | Got2-ps1   | processed_pseudogene | 3.31 | 4.01 | 3.27 | 4.28 | 4.27 | 4.27 | 4.47 | 4.47 |
| Down | ENSMUSG00000110532 | -4.41 | 2.99E-04 | Gm35857    | processed_pseudogene | 2.30 | 2.30 | 2.15 | 2.86 | 2.00 | 2.00 | 2.00 | 2.00 |
| Down | ENSMUSG00000082741 | -4.62 | 3.21E-04 | Gm9703     | processed_pseudogene | 2.30 | 2.30 | 2.84 | 2.00 | 2.00 | 2.00 | 2.00 | 2.00 |
| Down | ENSMUSG00000062284 | -2.29 | 3.23E-04 | Gm6030     | processed_pseudogene | 3.44 | 2.66 | 3.54 | 3.08 | 2.70 | 2.00 | 2.54 | 2.54 |
| Down | ENSMUSG00000082901 | -4.42 | 3.30E-04 | Gm14323    | processed_pseudogene | 3.77 | 3.39 | 2.74 | 3.15 | 2.25 | 2.00 | 2.00 | 2.12 |
| Down | ENSMUSG00000107833 | -4.44 | 3.30E-04 | Gm18791    | processed_pseudogene | 2.30 | 2.66 | 2.42 | 3.15 | 2.00 | 2.00 | 2.12 | 2.12 |
| Down | ENSMUSG00000105395 | -2.09 | 3.34E-04 | Gm42672    | processed_pseudogene | 3.10 | 3.19 | 3.30 | 4.02 | 2.00 | 2.00 | 3.24 | 3.24 |
| Down | ENSMUSG00000082046 | -3.01 | 3.49E-04 | Gm14464    | processed_pseudogene | 3.67 | 3.39 | 3.70 | 3.90 | 2.13 | 2.53 | 2.35 | 2.34 |
| Down | ENSMUSG00000050503 | -2.69 | 3.49E-04 | Gm8430     | processed_pseudogene | 3.77 | 3.92 | 3.65 | 3.01 | 2.57 | 2.12 | 2.24 | 2.62 |
| Down | ENSMUSG00000083435 | -5.12 | 3.69E-04 | Gm15824    | processed_pseudogene | 2.85 | 2.30 | 3.01 | 2.38 | 2.00 | 2.00 | 2.00 | 2.00 |
| Down | ENSMUSG00000082879 | -3.50 | 3.75E-04 | Gm13525    | processed_pseudogene | 2.00 | 3.19 | 3.16 | 2.69 | 2.00 | 2.00 | 2.00 | 2.34 |
| Down | ENSMUSG00000082829 | -3.38 | 3.78E-04 | Gm15780    | processed_pseudogene | 2.94 | 3.46 | 2.64 | 2.69 | 2.00 | 2.00 | 2.00 | 2.44 |
| Down | ENSMUSG00000113948 | -2.81 | 3.82E-04 | Rpl17-ps3  | processed_pseudogene | 2.65 | 2.86 | 2.93 | 2.94 | 2.00 | 2.44 | 2.00 | 2.12 |
| Down | ENSMUSG00000109447 | -5.84 | 3.91E-04 | Gm3198     | processed_pseudogene | 2.54 | 3.19 | 2.93 | 3.15 | 2.00 | 2.00 | 2.00 | 2.00 |
| Down | ENSMUSG00000085371 | -3.56 | 3.96E-04 | Gm3160     | processed_pseudogene | 2.65 | 2.00 | 3.97 | 2.86 | 2.13 | 2.00 | 2.00 | 2.34 |
| Down | ENSMUSG00000091507 | -4.63 | 4.01E-04 | Gm17194    | processed_pseudogene | 2.54 | 2.66 | 2.29 | 2.00 | 2.49 | 2.00 | 2.00 | 2.00 |
| Down | ENSMUSG00000090067 | -5.05 | 4.02E-04 | Gm2976     | processed_pseudogene | 2.75 | 2.66 | 2.64 | 2.49 | 2.00 | 2.00 | 2.00 | 2.00 |
| Down | ENSMUSG00000089764 | -2.32 | 4.15E-04 | Gm16580    | processed_pseudogene | 3.10 | 3.19 | 2.64 | 3.08 | 2.00 | 2.34 | 2.35 | 2.34 |
| Down | ENSMUSG00000068475 | -3.11 | 4.21E-04 | Gm10268    | processed_pseudogene | 2.43 | 3.03 | 3.01 | 3.33 | 2.25 | 2.00 | 2.13 | 2.24 |
| Down | ENSMUSG00000109492 | -4.97 | 4.26E-04 | Gm33882    | processed_pseudogene | 2.16 | 3.03 | 2.42 | 2.69 | 2.00 | 2.00 | 2.00 | 2.00 |
| Up   | ENSMUSG00000071035 | 1.43  | 4.30E-04 | Gm5499     | processed_pseudogene | 3.25 | 3.63 | 3.80 | 3.50 | 4.68 | 3.98 | 5.31 | 4.23 |
| Down | ENSMUSG00000099310 | -4.53 | 4.37E-04 | Gm19427    | processed_pseudogene | 2.00 | 3.03 | 2.29 | 2.38 | 2.00 | 2.00 | 2.00 | 2.00 |
| Down | ENSMUSG00000063556 | -2.24 | 4.41E-04 | Gm10132    | processed_pseudogene | 3.61 | 3.03 | 2.84 | 3.65 | 2.66 | 2.70 | 2.13 | 2.00 |
| Down | ENSMUSG00000082154 | -3.53 | 4.44E-04 | Gm16464    | processed_pseudogene | 3.02 | 2.55 | 3.43 | 3.60 | 2.00 | 2.34 | 2.00 | 2.24 |
| Down | ENSMUSG00000107082 | -4.81 | 4.47E-04 | Gm36378    | processed_pseudogene | 2.85 | 2.30 | 2.54 | 2.49 | 2.00 | 2.00 | 2.00 | 2.00 |
| Down | ENSMUSG00000080972 | -4.52 | 4.49E-04 | Gm16061    | processed_pseudogene | 2.43 | 2.43 | 2.42 | 2.59 | 2.00 | 2.00 | 2.00 | 2.00 |
| Down | ENSMUSG00000082705 | -4.42 | 4.52E-04 | Gm15616    | processed_pseudogene | 2.65 | 2.16 | 2.42 | 2.49 | 2.00 | 2.00 | 2.00 | 2.00 |
| Down | ENSMUSG00000084129 | -4.78 | 4.77E-04 | Hmgb1-ps1  | processed_pseudogene | 2.65 | 2.76 | 2.54 | 3.21 | 2.00 | 2.12 | 2.00 | 2.00 |
| Down | ENSMUSG00000098062 | -4.31 | 4.80E-04 | Gm26931    | processed_pseudogene | 2.54 | 2.30 | 2.64 | 2.94 | 2.00 | 2.00 | 2.00 | 2.12 |
| Down | ENSMUSG00000109760 | -6.08 | 4.82E-04 | Gm6503     | processed_pseudogene | 3.02 | 3.33 | 2.93 | 3.08 | 2.00 | 2.00 | 2.00 | 2.00 |
| Down | ENSMUSG00000111272 | -4.11 | 5.39E-04 | Gm7787     | processed_pseudogene | 2.85 | 3.33 | 2.74 | 3.45 | 2.00 | 2.34 | 2.00 | 2.00 |
| Down | ENSMUSG00000091795 | -1.83 | 5.54E-04 | Gm5235     | processed_pseudogene | 3.44 | 3.92 | 3.70 | 3.57 | 2.70 | 2.57 | 2.92 | 2.92 |
| Up   | ENSMUSG00000107395 | 4.40  | 5.65E-04 | Gm44331    | processed_pseudogene | 2.00 | 2.00 | 2.00 | 2.00 | 2.00 | 2.00 | 3.90 | 2.34 |
| Down | ENSMUSG00000113840 | -2.38 | 5.73E-04 | Gm18955    | processed_pseudogene | 2.75 | 4.01 | 3.70 | 2.77 | 2.00 | 2.00 | 2.24 | 2.24 |
| Down | ENSMUSG00000082930 | -4.19 | 5.94E-04 | Gm13462    | processed_pseudogene | 3.10 | 2.66 | 3.01 | 2.69 | 2.00 | 2.00 | 2.00 | 2.24 |
| Down | ENSMUSG00000102475 | -4.28 | 5.99E-04 | Gm37246    | processed_pseudogene | 2.85 | 3.03 | 3.01 | 2.77 | 2.00 | 2.00 | 2.00 | 2.24 |
| Down | ENSMUSG00000109736 | -3.04 | 6.05E-04 | Gm8734     | processed_pseudogene | 2.94 | 2.76 | 2.93 | 3.15 | 2.00 | 2.12 | 2.00 | 2.44 |
| Down | ENSMUSG00000093490 | -4.68 | 6.07E-04 | Gm19932    | processed_pseudogene | 2.16 | 2.76 | 2.93 | 3.08 | 2.00 | 2.00 | 2.00 | 2.12 |
| Down | ENSMUSG00000081619 | -4.59 | 6.27E-04 | Gm13351    | processed_pseudogene | 2.16 | 3.03 | 3.01 | 2.59 | 2.00 | 2.00 | 2.00 | 2.12 |
| Down | ENSMUSG00000082051 | -2.48 | 6.69E-04 | Gm16072    | processed_pseudogene | 3.25 | 2.95 | 3.75 | 3.55 | 2.00 | 2.70 | 2.00 | 2.44 |
| Down | ENSMUSG00000068141 | -3.82 | 6.74E-04 | Gm10232    | processed_pseudogene | 3.67 | 2.16 | 2.54 | 3.08 | 2.13 | 2.24 | 2.00 | 2.00 |
| Down | ENSMUSG00000084325 | -5.16 | 7.02E-04 | Gm15550    | processed_pseudogene | 2.85 | 2.43 | 2.42 | 2.94 | 2.00 | 2.00 | 2.00 | 2.00 |
| Down | ENSMUSG00000099008 | -2.59 | 7.48E-04 | Gm17976    | processed_pseudogene | 3.25 | 3.39 | 3.16 | 3.15 | 2.00 | 2.62 | 2.00 | 2.44 |
| Down | ENSMUSG00000082494 | -6.06 | 7.59E-04 | Gm13687    | processed_pseudogene | 2.65 | 3.46 | 3.30 | 2.77 | 2.00 | 2.00 | 2.00 | 2.00 |
| Down | ENSMUSG00000083619 | -5.06 | 7.93E-04 |            |                      |      |      |      |      |      |      |      |      |

|      |                    |       |          |            |                      |      |      |      |      |      |      |      |      |
|------|--------------------|-------|----------|------------|----------------------|------|------|------|------|------|------|------|------|
| Down | ENSMUSG00000112855 | -6.67 | 8.22E-04 | Gm47842    | processed_pseudogene | 3.10 | 3.11 | 4.01 | 3.33 | 2.00 | 2.00 | 2.00 | 2.00 |
| Down | ENSMUSG00000115370 | -5.21 | 8.26E-04 | Gm15667    | processed_pseudogene | 2.00 | 2.00 | 2.29 | 3.69 | 2.00 | 2.00 | 2.00 | 2.00 |
| Down | ENSMUSG00000081996 | -4.32 | 8.31E-04 | Gm7153     | processed_pseudogene | 2.85 | 2.95 | 2.93 | 3.01 | 2.00 | 2.00 | 2.00 | 2.24 |
| Down | ENSMUSG00000114551 | -4.61 | 8.47E-04 | Gm6035     | processed_pseudogene | 2.30 | 2.55 | 2.74 | 3.21 | 2.00 | 2.00 | 2.13 | 2.00 |
| Down | ENSMUSG00000116090 | -2.09 | 8.58E-04 | Rpl19-ps6  | processed_pseudogene | 3.18 | 3.29 | 3.65 | 3.15 | 2.25 | 2.62 | 2.79 | 2.00 |
| Down | ENSMUSG00000082576 | -5.32 | 8.79E-04 | Gm12058    | processed_pseudogene | 2.54 | 2.30 | 2.64 | 3.27 | 2.00 | 2.00 | 2.00 | 2.00 |
| Down | ENSMUSG00000082931 | -4.38 | 8.84E-04 | Gm15526    | processed_pseudogene | 2.54 | 2.86 | 2.54 | 2.84 | 2.00 | 2.00 | 2.13 | 2.00 |
| Down | ENSMUSG00000116838 | -1.90 | 9.00E-04 | Gm6475     | processed_pseudogene | 3.31 | 3.52 | 3.30 | 3.31 | 2.00 | 2.62 | 2.92 | 2.00 |
| Down | ENSMUSG00000084218 | -4.92 | 9.11E-04 | Gm8145     | processed_pseudogene | 2.75 | 2.66 | 2.54 | 3.39 | 2.00 | 2.00 | 2.00 | 2.12 |
| Down | ENSMUSG00000084131 | -3.00 | 9.54E-04 | Rpl3-ps2   | processed_pseudogene | 2.30 | 3.03 | 3.36 | 2.86 | 2.13 | 2.24 | 2.13 | 2.12 |
| Down | ENSMUSG00000083339 | -4.52 | 9.55E-04 | Gm11693    | processed_pseudogene | 2.94 | 2.76 | 2.42 | 2.69 | 2.13 | 2.00 | 2.00 | 2.00 |
| Down | ENSMUSG00000067058 | -4.09 | 9.63E-04 | Rps15a-ps5 | processed_pseudogene | 2.65 | 2.55 | 2.64 | 2.38 | 2.00 | 2.00 | 2.13 | 2.00 |
| Down | ENSMUSG00000082436 | -4.86 | 9.81E-04 | Gm11688    | processed_pseudogene | 2.16 | 2.16 | 2.93 | 2.86 | 2.00 | 2.00 | 2.00 | 2.00 |
| Down | ENSMUSG00000109610 | -4.42 | 1.01E-03 | Gm7432     | processed_pseudogene | 2.54 | 2.66 | 2.00 | 2.49 | 2.00 | 2.00 | 2.00 | 2.00 |
| Down | ENSMUSG00000080993 | -2.10 | 1.01E-03 | Gm12903    | processed_pseudogene | 3.31 | 3.52 | 3.09 | 3.27 | 2.25 | 2.00 | 2.54 | 2.78 |
| Down | ENSMUSG00000081783 | -3.03 | 1.04E-03 | Gm15599    | processed_pseudogene | 2.16 | 3.03 | 3.16 | 2.69 | 2.00 | 2.00 | 2.24 | 2.24 |
| Down | ENSMUSG00000110669 | -1.70 | 1.06E-03 | Gm10060    | processed_pseudogene | 3.99 | 3.97 | 4.01 | 3.74 | 2.74 | 2.70 | 2.24 | 3.57 |
| Down | ENSMUSG00000061062 | -1.95 | 1.08E-03 | Gm10093    | processed_pseudogene | 3.10 | 2.76 | 3.36 | 3.33 | 2.37 | 2.53 | 2.45 | 2.24 |
| Down | ENSMUSG00000081747 | -4.30 | 1.13E-03 | Rpl7a-ps9  | processed_pseudogene | 2.43 | 2.43 | 2.29 | 2.49 | 2.00 | 2.00 | 2.00 | 2.00 |
| Down | ENSMUSG00000085481 | -4.38 | 1.13E-03 | Gm16304    | processed_pseudogene | 2.30 | 2.16 | 2.64 | 2.49 | 2.00 | 2.00 | 2.00 | 2.00 |
| Down | ENSMUSG00000097991 | -5.55 | 1.15E-03 | Gm7656     | processed_pseudogene | 2.16 | 3.39 | 3.01 | 2.49 | 2.00 | 2.00 | 2.00 | 2.00 |
| Down | ENSMUSG00000052192 | -2.66 | 1.15E-03 | Gm5963     | processed_pseudogene | 2.94 | 2.55 | 3.01 | 2.59 | 2.13 | 2.34 | 2.13 | 2.00 |
| Down | ENSMUSG00000104841 | -2.09 | 1.15E-03 | Gm17743    | processed_pseudogene | 4.11 | 3.83 | 4.01 | 4.02 | 2.00 | 3.28 | 2.63 | 2.85 |
| Down | ENSMUSG00000106208 | -4.15 | 1.16E-03 | Gm4734     | processed_pseudogene | 2.54 | 2.66 | 3.54 | 2.38 | 2.00 | 2.00 | 2.00 | 2.24 |
| Down | ENSMUSG00000081499 | -4.69 | 1.18E-03 | Gm12517    | processed_pseudogene | 2.30 | 2.66 | 2.00 | 2.94 | 2.00 | 2.00 | 2.00 | 2.00 |
| Down | ENSMUSG00000081871 | -3.39 | 1.19E-03 | Gm11488    | processed_pseudogene | 2.54 | 3.63 | 2.84 | 2.59 | 2.00 | 2.12 | 2.13 | 2.24 |
| Down | ENSMUSG00000109882 | -1.46 | 1.21E-03 | Gm18706    | processed_pseudogene | 3.91 | 3.92 | 3.75 | 3.56 | 2.47 | 3.56 | 2.54 | 3.06 |
| Down | ENSMUSG00000086458 | -2.98 | 1.22E-03 | Gm2639     | processed_pseudogene | 2.43 | 3.03 | 2.64 | 2.94 | 2.00 | 2.00 | 2.00 | 2.44 |
| Down | ENSMUSG00000116274 | -4.94 | 1.23E-03 | Gm18724    | processed_pseudogene | 2.43 | 2.95 | 3.01 | 3.08 | 2.13 | 2.00 | 2.00 | 2.00 |
| Down | ENSMUSG00000081382 | -2.33 | 1.23E-03 | Rpl18-ps1  | processed_pseudogene | 2.65 | 2.86 | 2.84 | 3.01 | 2.13 | 2.44 | 2.13 | 2.12 |
| Down | ENSMUSG00000082520 | -4.41 | 1.25E-03 | Gm13349    | processed_pseudogene | 2.16 | 2.43 | 2.54 | 2.59 | 2.00 | 2.00 | 2.00 | 2.00 |
| Down | ENSMUSG00000093731 | -3.90 | 1.25E-03 | Gm26875    | processed_pseudogene | 3.10 | 2.95 | 3.09 | 2.94 | 2.13 | 2.00 | 2.00 | 2.24 |
| Down | ENSMUSG00000116386 | -4.58 | 1.27E-03 | Gm48528    | processed_pseudogene | 2.16 | 2.86 | 3.01 | 2.77 | 2.00 | 2.00 | 2.00 | 2.00 |
| Down | ENSMUSG00000068689 | -5.21 | 1.28E-03 | Gm18519    | processed_pseudogene | 3.02 | 3.39 | 2.54 | 3.01 | 2.00 | 2.00 | 2.12 | 2.00 |
| Down | ENSMUSG00000060777 | -4.30 | 1.33E-03 | Gm10087    | processed_pseudogene | 2.43 | 2.43 | 2.29 | 2.49 | 2.00 | 2.00 | 2.00 | 2.00 |
| Down | ENSMUSG00000111585 | -5.35 | 1.36E-03 | Gm47355    | processed_pseudogene | 3.02 | 3.11 | 2.93 | 3.27 | 2.00 | 2.00 | 2.12 | 2.00 |
| Down | ENSMUSG00000082605 | -4.75 | 1.36E-03 | Gm16148    | processed_pseudogene | 2.30 | 2.95 | 2.64 | 2.14 | 2.00 | 2.00 | 2.00 | 2.00 |
| Down | ENSMUSG00000110966 | -4.41 | 1.38E-03 | Gm47255    | processed_pseudogene | 2.54 | 2.16 | 2.42 | 2.59 | 2.00 | 2.00 | 2.00 | 2.00 |
| Down | ENSMUSG00000081992 | -2.60 | 1.39E-03 | Gm13408    | processed_pseudogene | 2.94 | 3.03 | 2.29 | 3.08 | 2.00 | 2.00 | 2.00 | 2.62 |
| Down | ENSMUSG00000083183 | -4.05 | 1.40E-03 | Gm15575    | processed_pseudogene | 2.65 | 3.26 | 2.84 | 2.00 | 2.00 | 2.00 | 2.00 | 2.24 |
| Down | ENSMUSG00000079906 | -4.63 | 1.44E-03 | Gm15846    | processed_pseudogene | 2.43 | 2.43 | 2.74 | 2.38 | 2.00 | 2.00 | 2.00 | 2.00 |
| Down | ENSMUSG00000062611 | -1.70 | 1.47E-03 | Rps3a2     | processed_pseudogene | 3.31 | 3.26 | 3.16 | 3.33 | 2.25 | 2.34 | 2.45 | 2.34 |
| Down | ENSMUSG00000116041 | -4.92 | 1.48E-03 | Gm20369    | processed_pseudogene | 2.30 | 2.95 | 2.84 | 2.14 | 2.00 | 2.00 | 2.00 | 2.00 |
| Down | ENSMUSG00000116994 | -4.63 | 1.49E-03 | Gm49684    | processed_pseudogene | 2.54 | 2.55 | 2.42 | 2.00 | 2.00 | 2.00 | 2.00 | 2.00 |
| Down | ENSMUSG00000083382 | -4.50 | 1.53E-03 | Gm6433     | processed_pseudogene | 2.30 | 3.43 | 2.29 | 2.77 | 2.00 | 2.00 | 2.00 | 2.00 |
| Down | ENSMUSG00000081817 | -3.21 | 1.54E-03 | Gm13590    | processed_pseudogene | 3.10 | 2.03 | 2.84 | 3.15 | 2.00 | 2.00 | 2.00 | 2.54 |
| Down | ENSMUSG00000090449 | -4.47 | 1.56E-03 | Gm17076    | processed_pseudogene | 3.52 | 3.52 | 3.49 | 3.34 | 2.00 | 2.00 | 2.00 | 2.34 |
| Down | ENSMUSG00000036305 | -2.09 | 1.58E-03 | Rpl39-ps   | processed_pseudogene | 2.85 | 3.11 | 2.74 | 2.59 | 2.13 | 2.24 | 2.13 | 2.44 |
| Down | ENSMUSG00000107770 | -4.41 | 1.59E-03 | Gm44126    | processed_pseudogene | 2.43 | 2.30 | 2.42 | 2.59 | 2.00 | 2.00 | 2.00 | 2.00 |
| Down | ENSMUSG00000082938 | -3.63 | 1.59E-03 | Gm2810     | processed_pseudogene | 2.54 | 3.03 | 2.54 | 3.27 | 2.00 | 2.24 | 2.00 | 2.12 |
| Down | ENSMUSG00000083512 | -2.90 | 1.59E-03 | Gm12749    | processed_pseudogene | 2.85 | 3.03 | 3.01 | 3.15 | 2.13 | 2.12 | 2.24 | 2.24 |
| Down | ENSMUSG00000114451 | -5.50 | 1.60E-03 | Gm47321    | processed_pseudogene | 2.54 | 2.76 | 2.64 | 3.21 | 2.00 | 2.00 | 2.00 | 2.00 |
| Down | ENSMUSG00000105893 | -2.31 | 1.61E-03 | Wdr46-ps   | processed_pseudogene | 3.25 | 2.86 | 3.97 | 3.39 | 2.00 | 2.00 | 2.24 | 3.12 |
| Down | ENSMUSG00000089651 | -3.81 | 1.68E-03 | Gm16353    | processed_pseudogene | 2.94 | 2.55 | 3.09 | 2.14 | 2.00 | 2.00 | 2.00 | 2.24 |
| Down | ENSMUSG00000070271 | -2.21 | 1.69E-03 | Gm13268    | processed_pseudogene | 3.44 | 2.86 | 3.09 | 3.27 | 2.00 | 2.62 | 2.00 | 2.34 |
| Down | ENSMUSG00000082367 | -3.82 | 1.71E-03 | Gm12363    | processed_pseudogene | 3.61 | 3.19 | 2.29 | 2.38 | 2.00 | 2.00 | 2.00 | 2.24 |
| Down | ENSMUSG00000052157 | -4.02 | 1.73E-03 | Gm650      | processed_pseudogene | 2.85 | 2.30 | 2.93 | 3.01 | 2.00 | 2.00 | 2.00 | 2.34 |
| Down | ENSMUSG00000097086 | -2.87 | 1.75E-03 | Gm7672     | processed_pseudogene | 3.56 | 3.88 | 2.93 | 3.08 | 2.00 | 2.78 | 2.00 | 2.24 |
| Down | ENSMUSG00000085116 | -2.48 | 1.76E-03 | Gm2735     | processed_pseudogene | 3.18 | 3.19 | 3.54 | 3.08 | 2.13 | 2.53 | 2.00 | 2.54 |
| Down | ENSMUSG00000112297 | -1.94 | 1.85E-03 | Gm17816    | processed_pseudogene | 3.18 | 3.11 | 3.43 | 3.50 | 2.37 | 2.53 | 2.00 | 2.85 |
| Down | ENSMUSG00000102984 | -4.31 | 1.87E-03 | Gm34727    | processed_pseudogene | 2.43 | 2.86 | 2.29 | 2.86 | 2.00 | 2.00 | 2.13 | 2.00 |
| Down | ENSMUSG00000068088 | -2.54 | 1.88E-03 | Gm13611    | processed_pseudogene | 2.65 | 3.03 | 2.74 | 2.49 | 2.13 | 2.00 | 2.13 | 2.34 |
| Up   | ENSMUSG00000090790 | 1.82  | 1.89E-03 | Gm7638     | processed_pseudogene | 4.82 | 3.26 | 4.27 | 4.02 | 6.53 | 4.56 | 6.26 | 4.66 |
| Down | ENSMUSG00000083909 | -2.11 | 1.89E-03 | Gm15842    | processed_pseudogene | 2.85 | 3.33 | 3.23 | 3.27 | 2.00 | 3.05 | 2.00 | 2.12 |
| Down | ENSMUSG00000083622 | -4.42 | 1.95E-03 | Gm15570    | processed_pseudogene | 2.65 | 2.43 | 2.29 | 2.38 | 2.00 | 2.00 | 2.00 | 2.00 |
| Down | ENSMUSG00000091952 | -1.89 | 1.99E-03 | Gm17709    | processed_pseudogene | 2.85 | 3.19 | 2.84 | 3.50 | 2.13 | 2.44 | 2.00 | 2.85 |
| Down | ENSMUSG00000113993 | -2.37 | 2.00E-03 | Gm47659    | processed_pseudogene | 2.65 | 2.76 | 3.09 | 2.94 | 2.00 | 2.00 | 2.00 | 2.34 |
| Down | ENSMUSG00000082412 | -4.45 | 2.01E-03 | Fau-ps1    | processed_pseudogene | 2.30 | 2.86 | 2.74 | 2.77 | 2.00 | 2.00 | 2.12 | 2.00 |
| Down | ENSMUSG00000080937 | -4.20 | 2.01E-03 | Gm13510    | processed_pseudogene | 2.43 | 2.76 | 2.15 | 2.14 | 2.00 | 2.00 | 2.00 | 2.00 |
| Down | ENSMUSG00000111349 | -4.52 | 2.05E-03 | Gm48191    | processed_pseudogene | 2.85 | 2.16 | 2.29 | 2.49 | 2.00 | 2.00 | 2.00 | 2.00 |
| Down | ENSMUSG00000085897 | -2.59 | 2.06E-03 | Gm11604    | processed_pseudogene | 2.85 | 3.52 | 3.01 | 2.77 | 2.00 | 2.62 | 2.13 | 2.12 |
| Down | ENSMUSG00000082247 | -4.25 | 2.07E-03 | Gm16074    | processed_pseudogene | 2.16 | 3.03 | 2.42 | 2.69 | 2.13 | 2.00 | 2.00 | 2.00 |
| Down | ENSMUSG00000101066 | -4.17 | 2.07E-03 | Gm28299    | processed_pseudogene | 2.30 | 2.43 | 2.15 | 2.59 | 2.00 | 2.00 | 2.00 | 2.00 |
| Down | ENSMUSG00000091313 | -4.22 | 2.09E-03 | Rpl13-ps2  | processed_pseudogene | 2.86 | 2.86 | 2.86 | 2.38 | 2.00 | 2.34 | 2.00 | 2.00 |
| Down | ENSMUSG00000059585 | -2.00 | 2.13E-03 | Ube2n1     | processed_pseudogene | 2.00 | 3.03 | 2.29 | 2.59 | 2.00 | 2.00 | 2.12 | 2.00 |
| Down | ENSMUSG00000112061 | -4.86 | 2.19E-03 | Gm8249     | processed_pseudogene | 2.30 | 2.66 | 2.29 | 2.94 | 2.00 | 2.00 | 2.00 | 2.00 |
| Down | ENSMUSG00000081378 | -4.30 | 2.19E-03 | Rps13-ps4  | processed_pseudogene | 2.00 | 2.85 | 2.29 | 2.38 | 2.00 | 2.00 | 2.00 | 2.00 |
| Down | ENSMUSG00000049124 | -1.41 | 2.19E-03 | Gm8186     | processed_pseudogene | 3.38 | 3.92 | 3.93 | 4.42 | 2.47 | 3.73 | 2.79 | 2.92 |
| Down | ENSMUSG00000061848 | -1.87 | 2.23E-03 | Gm5805     | processed_pseudogene | 3.44 | 2.66 | 2.25 | 2.86 | 2.12 | 2.35 | 2.79 | 2.92 |
| Down | ENSMUSG00000108347 | -3.42 | 2.27E-03 | Gm19187    | processed_pseudogene | 3.10 | 3.46 | 2.64 | 3.27 | 2.00 | 2.24 | 2.00 | 2.34 |
| Down | ENSMUSG00000113473 | -3.33 | 2.30E-03 | Gm7045     | processed_pseudogene | 3.67 | 3.52 | 2.84 | 4.12 | 2.00 | 2.00 | 2.00 | 2.85 |
| Down | ENSMUSG00000112138 | -4.51 | 2.31E-03 | Gm47526    | processed_pseudogene | 2.43 | 2.30 | 2.54 | 2.59 | 2.00 | 2.00 | 2.00 | 2.00 |
| Down | ENSMUSG00000106917 | -1.70 | 2.31E-03 | Gm7832     | processed_pseudogene | 3.81 | 4.37 | 4.80 | 4.34 | 4.01 | 2.93 | 2.85 | 2.85 |
| Down | ENSMUSG00000109465 | -4.81 | 2.32E-03 | Gm19032    | processed_pseudogene | 2.30 | 2.55 | 2.93 | 2.38 | 2.00 | 2.00 | 2.00 | 2.00 |
| Down | ENSMUSG00000103293 | -2.75 | 2.33E-03 | Gm5842     | processed_pseudogene | 2.94 | 3.11 | 2.93 | 2.13 | 2.00 | 2.13 | 2.00 | 2.44 |
| Down | ENSMUSG00000082195 | -2.74 | 2.33E-03 | Gm13034</  |                      |      |      |      |      |      |      |      |      |

|      |                    |       |          |               |                      |      |      |      |      |      |      |      |      |
|------|--------------------|-------|----------|---------------|----------------------|------|------|------|------|------|------|------|------|
| Down | ENSMUSG00000080980 | -4.60 | 2.40E-03 | 1700071K01Rik | processed_pseudogene | 3.10 | 2.76 | 2.54 | 2.49 | 2.00 | 2.00 | 2.00 | 2.12 |
| Down | ENSMUSG00000083569 | -4.07 | 2.40E-03 | Gm13666       | processed_pseudogene | 2.16 | 2.86 | 2.15 | 2.86 | 2.00 | 2.00 | 2.00 | 2.12 |
| Down | ENSMUSG00000105233 | -3.98 | 2.42E-03 | Gm20568       | processed_pseudogene | 2.00 | 2.30 | 2.74 | 2.86 | 2.00 | 2.00 | 2.00 | 2.12 |
| Down | ENSMUSG00000082823 | -2.59 | 2.43E-03 | Gm15828       | processed_pseudogene | 2.94 | 2.55 | 2.42 | 3.01 | 2.00 | 2.00 | 2.24 | 2.35 |
| Down | ENSMUSG00000115280 | -2.72 | 2.46E-03 | Gm7107        | processed_pseudogene | 2.85 | 4.17 | 2.64 | 3.08 | 2.00 | 2.00 | 2.62 | 2.13 |
| Down | ENSMUSG00000112496 | -3.20 | 2.49E-03 | Gm48659       | processed_pseudogene | 2.85 | 3.11 | 2.74 | 2.77 | 2.00 | 2.00 | 2.00 | 2.44 |
| Down | ENSMUSG00000092510 | -3.27 | 2.50E-03 | Gm19343       | processed_pseudogene | 3.56 | 2.86 | 3.56 | 3.86 | 2.00 | 2.00 | 2.00 | 2.62 |
| Down | ENSMUSG00000110845 | -4.40 | 2.54E-03 | Gm47481       | processed_pseudogene | 2.43 | 2.30 | 2.29 | 2.29 | 2.00 | 2.00 | 2.00 | 2.00 |
| Down | ENSMUSG00000105645 | -1.01 | 2.54E-03 | Gm6649        | processed_pseudogene | 4.80 | 5.21 | 5.15 | 5.12 | 4.06 | 4.27 | 3.19 | 4.90 |
| Down | ENSMUSG00000099397 | -1.90 | 2.57E-03 | Gm7809        | processed_pseudogene | 2.94 | 2.95 | 3.23 | 3.15 | 2.37 | 2.34 | 2.00 | 2.70 |
| Down | ENSMUSG00000083306 | -1.91 | 2.59E-03 | Gm13868       | processed_pseudogene | 2.94 | 3.52 | 2.54 | 3.15 | 2.00 | 2.44 | 2.35 | 2.62 |
| Down | ENSMUSG00000108694 | -4.45 | 2.64E-03 | Gm7287        | processed_pseudogene | 2.43 | 2.95 | 2.15 | 2.14 | 2.00 | 2.00 | 2.00 | 2.00 |
| Down | ENSMUSG00000089640 | -1.93 | 2.64E-03 | Gm6397        | processed_pseudogene | 2.75 | 3.03 | 3.49 | 3.01 | 2.37 | 2.12 | 2.86 | 2.00 |
| Down | ENSMUSG00000083076 | -2.51 | 2.65E-03 | Gm11408       | processed_pseudogene | 3.18 | 2.76 | 2.74 | 3.01 | 2.00 | 2.00 | 2.35 | 2.44 |
| Down | ENSMUSG00000080875 | -2.79 | 2.67E-03 | Gm7332        | processed_pseudogene | 2.85 | 2.76 | 2.64 | 3.45 | 2.37 | 2.00 | 2.24 | 2.12 |
| Down | ENSMUSG00000083808 | -4.00 | 2.71E-03 | Gm3828        | processed_pseudogene | 2.00 | 2.43 | 3.09 | 2.38 | 2.00 | 2.00 | 2.13 | 2.00 |
| Down | ENSMUSG00000082599 | -2.85 | 2.71E-03 | Gm13141       | processed_pseudogene | 4.29 | 4.41 | 3.97 | 4.12 | 2.47 | 2.44 | 2.00 | 3.17 |
| Down | ENSMUSG00000083841 | -4.30 | 2.73E-03 | Gm1947        | processed_pseudogene | 3.10 | 2.55 | 2.54 | 3.33 | 2.00 | 2.00 | 2.00 | 2.24 |
| Down | ENSMUSG00000112218 | -4.80 | 2.74E-03 | Gm18726       | processed_pseudogene | 3.56 | 3.03 | 2.84 | 3.21 | 2.00 | 2.00 | 2.00 | 2.24 |
| Down | ENSMUSG00000083754 | -1.90 | 2.75E-03 | Gm10136       | processed_pseudogene | 2.43 | 2.43 | 2.93 | 2.74 | 2.12 | 2.12 | 2.13 | 2.24 |
| Down | ENSMUSG00000082274 | -1.66 | 2.76E-03 | Gm14026       | processed_pseudogene | 3.25 | 3.68 | 3.16 | 3.01 | 2.67 | 2.47 | 2.79 | 2.54 |
| Down | ENSMUSG00000111985 | -4.29 | 2.78E-03 | Gm8290        | processed_pseudogene | 2.94 | 2.30 | 2.84 | 3.39 | 2.00 | 2.00 | 2.00 | 2.24 |
| Down | ENSMUSG00000081845 | -1.02 | 2.83E-03 | Gm12338       | processed_pseudogene | 3.56 | 3.73 | 3.60 | 4.15 | 2.82 | 3.61 | 3.00 | 2.99 |
| Down | ENSMUSG00000116580 | -2.44 | 2.90E-03 | Gm9525        | processed_pseudogene | 2.85 | 3.83 | 2.84 | 2.86 | 2.25 | 2.70 | 2.00 | 2.12 |
| Down | ENSMUSG00000112196 | -4.60 | 2.93E-03 | Gm8274        | processed_pseudogene | 2.75 | 3.19 | 2.29 | 2.00 | 2.00 | 2.00 | 2.00 | 2.12 |
| Down | ENSMUSG00000079138 | -4.02 | 2.93E-03 | Gm8818        | processed_pseudogene | 2.43 | 3.03 | 2.42 | 2.14 | 2.00 | 2.00 | 2.00 | 2.12 |
| Down | ENSMUSG00000083305 | -3.59 | 2.93E-03 | Gm13315       | processed_pseudogene | 2.65 | 2.55 | 3.16 | 3.01 | 2.00 | 2.12 | 2.00 | 2.24 |
| Down | ENSMUSG00000114409 | -2.19 | 2.94E-03 | Gm9042        | processed_pseudogene | 2.75 | 3.78 | 3.54 | 2.86 | 2.13 | 2.24 | 2.71 | 2.44 |
| Down | ENSMUSG00000083876 | -2.75 | 2.99E-03 | Gm11439       | processed_pseudogene | 2.30 | 2.95 | 2.54 | 3.27 | 2.00 | 2.12 | 2.00 | 2.44 |
| Down | ENSMUSG00000100436 | -2.98 | 3.02E-03 | Gm29657       | processed_pseudogene | 2.75 | 3.03 | 2.64 | 2.69 | 2.25 | 2.00 | 2.00 | 2.24 |
| Down | ENSMUSG00000056412 | -2.08 | 3.02E-03 | Gm12396       | processed_pseudogene | 2.30 | 2.95 | 3.01 | 2.94 | 2.00 | 2.00 | 2.45 | 2.00 |
| Down | ENSMUSG00000111594 | -4.20 | 3.05E-03 | Stm11-rs1     | processed_pseudogene | 2.00 | 2.30 | 2.64 | 3.15 | 2.00 | 2.12 | 2.00 | 2.00 |
| Down | ENSMUSG00000080469 | -3.32 | 3.07E-03 | Gm9770        | processed_pseudogene | 2.32 | 2.43 | 2.74 | 2.32 | 2.12 | 2.12 | 2.13 | 2.24 |
| Down | ENSMUSG00000109435 | -2.86 | 3.07E-03 | Gm1308        | processed_pseudogene | 3.38 | 3.19 | 3.69 | 3.00 | 2.69 | 2.93 | 2.00 | 2.24 |
| Down | ENSMUSG00000112068 | -4.78 | 3.17E-03 | Gm9182        | processed_pseudogene | 2.54 | 2.30 | 2.42 | 2.86 | 2.00 | 2.00 | 2.00 | 2.00 |
| Down | ENSMUSG00000082190 | -3.99 | 3.20E-03 | Gm13641       | processed_pseudogene | 2.30 | 2.76 | 2.29 | 2.69 | 2.00 | 2.00 | 2.12 | 2.00 |
| Down | ENSMUSG00000084162 | -5.44 | 3.22E-03 | Gm11251       | processed_pseudogene | 3.72 | 3.68 | 2.93 | 3.82 | 2.00 | 2.00 | 2.00 | 2.24 |
| Down | ENSMUSG00000083233 | -4.55 | 3.26E-03 | Gm13406       | processed_pseudogene | 2.75 | 2.43 | 2.54 | 2.14 | 2.00 | 2.00 | 2.00 | 2.00 |
| Down | ENSMUSG00000092563 | -2.45 | 3.26E-03 | Gm3617        | processed_pseudogene | 2.43 | 3.52 | 2.93 | 2.49 | 2.00 | 2.44 | 2.13 | 2.24 |
| Down | ENSMUSG00000082855 | -3.26 | 3.27E-03 | Gm14537       | processed_pseudogene | 2.65 | 3.11 | 3.49 | 2.86 | 2.00 | 2.00 | 2.00 | 2.54 |
| Down | ENSMUSG00000110683 | -4.18 | 3.29E-03 | Gm45874       | processed_pseudogene | 2.30 | 2.55 | 2.29 | 2.38 | 2.00 | 2.00 | 2.00 | 2.00 |
| Down | ENSMUSG00000113501 | -3.81 | 3.30E-03 | Gm18940       | processed_pseudogene | 3.02 | 2.43 | 2.84 | 2.49 | 2.00 | 2.00 | 2.00 | 2.24 |
| Down | ENSMUSG00000089657 | -3.21 | 3.30E-03 | Gm16585       | processed_pseudogene | 3.10 | 2.86 | 3.70 | 3.01 | 2.66 | 2.00 | 2.00 | 2.00 |
| Down | ENSMUSG00000083061 | -1.61 | 3.34E-03 | Gm12191       | processed_pseudogene | 3.67 | 3.73 | 3.60 | 3.40 | 3.05 | 2.13 | 2.00 | 2.12 |
| Down | ENSMUSG00000081745 | -4.01 | 3.35E-03 | Gm15549       | processed_pseudogene | 2.85 | 2.16 | 2.84 | 2.14 | 2.00 | 2.00 | 2.00 | 2.12 |
| Down | ENSMUSG00000098026 | -3.59 | 3.38E-03 | Gm27014       | processed_pseudogene | 2.65 | 3.11 | 2.93 | 3.45 | 2.00 | 2.00 | 2.13 | 2.34 |
| Down | ENSMUSG00000110287 | -4.30 | 3.40E-03 | Gm45313       | processed_pseudogene | 2.30 | 2.30 | 2.64 | 2.30 | 2.00 | 2.00 | 2.00 | 2.00 |
| Down | ENSMUSG00000081400 | -1.76 | 3.42E-03 | Gm13680       | processed_pseudogene | 2.94 | 3.63 | 2.93 | 3.21 | 2.13 | 2.00 | 2.24 | 2.24 |
| Down | ENSMUSG00000083579 | -2.17 | 3.44E-03 | Gm15538       | processed_pseudogene | 2.94 | 3.39 | 2.74 | 2.94 | 2.25 | 2.24 | 2.34 | 2.34 |
| Down | ENSMUSG00000081049 | -1.64 | 3.44E-03 | Rps24-ps3     | processed_pseudogene | 3.38 | 2.86 | 2.74 | 2.94 | 2.47 | 2.34 | 2.54 | 2.24 |
| Down | ENSMUSG00000096942 | -1.72 | 3.46E-03 | Rps19-ps6     | processed_pseudogene | 3.95 | 3.46 | 2.64 | 3.78 | 3.29 | 2.00 | 2.24 | 2.78 |
| Down | ENSMUSG00000114359 | -4.18 | 3.62E-03 | Gm47816       | processed_pseudogene | 2.00 | 2.86 | 3.01 | 2.27 | 2.00 | 2.00 | 2.00 | 2.12 |
| Down | ENSMUSG00000099934 | -3.98 | 3.66E-03 | Gm17983       | processed_pseudogene | 3.61 | 2.66 | 2.42 | 3.21 | 2.00 | 2.00 | 2.00 | 2.34 |
| Down | ENSMUSG00000058905 | -3.70 | 3.67E-03 | Gm10051       | processed_pseudogene | 2.43 | 2.66 | 2.42 | 2.27 | 2.00 | 2.00 | 2.00 | 2.12 |
| Down | ENSMUSG00000095427 | -4.06 | 3.70E-03 | Rps2-ps6      | processed_pseudogene | 2.54 | 2.16 | 2.42 | 2.94 | 2.13 | 2.00 | 2.00 | 2.00 |
| Down | ENSMUSG00000081648 | -2.03 | 3.75E-03 | Gm13423       | processed_pseudogene | 3.50 | 3.52 | 3.09 | 3.33 | 2.57 | 2.98 | 2.00 | 2.12 |
| Down | ENSMUSG00000081800 | -4.47 | 3.79E-03 | Gm14200       | processed_pseudogene | 3.10 | 2.16 | 3.01 | 2.27 | 2.00 | 2.00 | 2.00 | 2.12 |
| Down | ENSMUSG00000044141 | -4.58 | 3.82E-03 | E130201H02Rik | processed_pseudogene | 3.38 | 3.11 | 2.93 | 3.13 | 2.00 | 2.12 | 2.00 | 2.12 |
| Down | ENSMUSG00000082179 | -3.14 | 3.82E-03 | Rm11407       | processed_pseudogene | 2.85 | 3.11 | 3.09 | 2.94 | 2.00 | 2.24 | 2.00 | 2.34 |
| Down | ENSMUSG00000112772 | -4.73 | 3.83E-03 | Gm48400       | processed_pseudogene | 3.18 | 2.00 | 2.29 | 2.38 | 2.00 | 2.00 | 2.00 | 2.00 |
| Down | ENSMUSG00000092549 | -2.15 | 3.92E-03 | Gm20491       | processed_pseudogene | 2.54 | 2.76 | 3.30 | 3.01 | 2.25 | 2.34 | 2.00 | 2.44 |
| Down | ENSMUSG00000114201 | -5.45 | 3.97E-03 | Gm18079       | processed_pseudogene | 2.30 | 2.86 | 3.09 | 2.00 | 2.00 | 2.00 | 2.00 | 2.00 |
| Down | ENSMUSG00000090027 | -3.05 | 4.00E-03 | Gm15740       | processed_pseudogene | 3.25 | 3.11 | 2.93 | 3.08 | 2.13 | 2.00 | 2.00 | 2.54 |
| Down | ENSMUSG00000078128 | -4.19 | 4.01E-03 | Gm2178        | processed_pseudogene | 2.65 | 2.16 | 2.54 | 2.14 | 2.00 | 2.00 | 2.00 | 2.00 |
| Down | ENSMUSG00000105338 | -2.86 | 4.02E-03 | Gm43802       | processed_pseudogene | 3.56 | 3.03 | 3.36 | 2.77 | 2.00 | 2.53 | 2.00 | 2.34 |
| Down | ENSMUSG00000091460 | -2.94 | 4.03E-03 | Gm7808        | processed_pseudogene | 2.65 | 2.66 | 2.64 | 2.49 | 2.13 | 2.24 | 2.00 | 2.00 |
| Down | ENSMUSG00000092617 | -4.06 | 4.05E-03 | Gm8412        | processed_pseudogene | 2.00 | 2.76 | 2.42 | 3.21 | 2.00 | 2.00 | 2.00 | 2.00 |
| Down | ENSMUSG00000081570 | -3.53 | 4.05E-03 | Gm12192       | processed_pseudogene | 2.16 | 2.30 | 3.30 | 2.14 | 2.00 | 2.00 | 2.00 | 2.34 |
| Down | ENSMUSG00000082001 | -3.79 | 4.07E-03 | Gm15607       | processed_pseudogene | 2.85 | 2.16 | 2.84 | 2.86 | 2.00 | 2.00 | 2.00 | 2.24 |
| Down | ENSMUSG00000091230 | -2.16 | 4.09E-03 | Gm6970        | processed_pseudogene | 3.50 | 2.95 | 3.60 | 3.65 | 2.00 | 2.00 | 2.63 | 2.00 |
| Down | ENSMUSG00000092257 | -2.72 | 4.12E-03 | Gm2308        | processed_pseudogene | 2.94 | 2.86 | 2.74 | 2.69 | 2.13 | 2.12 | 2.24 | 2.12 |
| Down | ENSMUSG00000082035 | -3.70 | 4.14E-03 | Rpl17-ps8     | processed_pseudogene | 2.00 | 2.66 | 2.54 | 2.00 | 2.00 | 2.00 | 2.00 | 2.12 |
| Down | ENSMUSG00000113782 | -5.63 | 4.19E-03 | Gm48009       | processed_pseudogene | 2.65 | 2.86 | 3.16 | 3.15 | 2.00 | 2.00 | 2.00 | 2.00 |
| Down | ENSMUSG00000118647 | -2.53 | 4.20E-03 | Gm30251       | processed_pseudogene | 2.65 | 2.66 | 2.20 | 2.12 | 2.00 | 2.00 | 2.00 | 2.00 |
| Down | ENSMUSG00000094932 | -1.44 | 4.30E-03 | Gm3788        | processed_pseudogene | 3.18 | 3.11 | 2.74 | 3.08 | 2.47 | 2.62 | 2.35 | 2.44 |
| Down | ENSMUSG00000080754 | -4.12 | 4.33E-03 | Rpl36-ps7     | processed_pseudogene | 3.77 | 3.39 | 3.49 | 2.59 | 2.13 | 2.24 | 2.00 | 2.12 |
| Down | ENSMUSG00000044609 | -3.24 | 4.46E-03 | Gm9294        | processed_pseudogene | 2.65 | 2.76 | 2.42 | 3.86 | 2.00 | 2.44 | 2.13 | 2.00 |
| Down | ENSMUSG00000113423 | -3.79 | 4.47E-03 | Gm3791        | processed_pseudogene | 2.43 | 2.16 | 2.42 | 2.77 | 2.13 | 2.00 | 2.00 | 2.00 |
| Down | ENSMUSG00000078126 | -1.35 | 4.47E-03 | Rpl23a-ps3    | processed_pseudogene | 3.81 | 3.19 | 3.54 | 3.33 | 2.66 | 2.34 | 2.35 | 3.44 |
| Down | ENSMUSG00000084391 | -4.18 | 4.55E-03 | Gm13967       | processed_pseudogene | 2.43 | 2.30 | 2.54 | 2.27 | 2.00 | 2.00 | 2.00 | 2.00 |
| Down | ENSMUSG00000060128 | -3.34 | 4.62E-03 | Gm2710        | processed_pseudogene | 2.94 | 2.66 | 2.74 | 2.69 | 2.00 | 2.12 | 2.13 | 2.12 |
| Down | ENSMUSG00000081805 | -2.20 | 4.71E-03 | Gm14335       | processed_pseudogene | 3.50 | 2.43 | 3.09 | 2.59 | 2.47 | 2.00 | 2.00 | 2.54 |
| Down | ENSMUSG00000082967 | -4.40 | 4.74E-03 | Gm16082       | processed_pseudogene | 2.30 | 3.57 | 3.30 | 2.27 | 2.00 | 2.00 | 2.00 | 2.24 |
| Down | ENSMUSG00000109991 | -2.99 | 4.78E-03 | Gm6284        | processed_pseudogene | 4.45 | 3.88 | 4.17 | 3.74 | 2.00 | 2.74 | 2.79 | 2.00 |
| Down | ENSMUSG00000080895 | -4.75 | 4.80E-03 | Gm11645       | processed_pseudogene | 3.25 | 3.33 | 2.15 | 2.00 | 2.32 | 2.12 | 2.00 | 2.00 |
| Down | ENSMUSG00000082072 | -3.12 | 4.8      |               |                      |      |      |      |      |      |      |      |      |



|      |                    |       |          |            |                      |      |      |      |      |      |      |      |      |
|------|--------------------|-------|----------|------------|----------------------|------|------|------|------|------|------|------|------|
| Down | ENSMUSG00000083420 | -1.63 | 5.03E-03 | Gm15665    | processed_pseudogene | 3.18 | 3.11 | 3.49 | 3.82 | 2.00 | 2.00 | 3.30 | 2.78 |
| Down | ENSMUSG00000086436 | -4.05 | 5.13E-03 | Gm13690    | processed_pseudogene | 2.30 | 2.30 | 2.64 | 2.14 | 2.00 | 2.00 | 2.00 | 2.00 |
| Down | ENSMUSG00000089673 | -2.92 | 5.13E-03 | Gm16546    | processed_pseudogene | 2.16 | 3.57 | 3.16 | 2.86 | 2.00 | 2.00 | 2.00 | 2.62 |
| Down | ENSMUSG00000098506 | -1.82 | 5.18E-03 | Phi20-ps   | processed_pseudogene | 3.61 | 3.39 | 3.70 | 3.27 | 2.13 | 2.62 | 2.24 | 3.17 |
| Down | ENSMUSG00000081300 | -4.69 | 5.19E-03 | Gm14587    | processed_pseudogene | 2.16 | 2.66 | 3.30 | 2.77 | 2.00 | 2.00 | 2.00 | 2.00 |
| Down | ENSMUSG00000112099 | -1.90 | 5.23E-03 | Gm8960     | processed_pseudogene | 2.65 | 2.76 | 3.23 | 2.86 | 2.57 | 2.34 | 2.00 | 2.24 |
| Down | ENSMUSG00000108963 | -2.41 | 5.33E-03 | Gm14716    | processed_pseudogene | 4.18 | 4.13 | 4.44 | 3.92 | 2.30 | 2.33 | 2.00 | 2.78 |
| Down | ENSMUSG00000081301 | -2.84 | 5.36E-03 | Gm15951    | processed_pseudogene | 3.77 | 5.17 | 5.13 | 4.34 | 2.37 | 2.00 | 3.90 | 2.12 |
| Down | ENSMUSG00000115224 | -3.87 | 5.36E-03 | Gm49215    | processed_pseudogene | 2.30 | 2.16 | 2.00 | 2.69 | 2.00 | 2.00 | 2.00 | 2.00 |
| Down | ENSMUSG00000113511 | -1.61 | 5.50E-03 | Gm19046    | processed_pseudogene | 2.65 | 3.26 | 3.49 | 3.60 | 2.00 | 3.17 | 2.00 | 2.70 |
| Down | ENSMUSG00000092526 | -1.99 | 5.61E-03 | Gm17907    | processed_pseudogene | 2.43 | 3.68 | 3.84 | 3.45 | 2.57 | 2.98 | 2.00 | 2.34 |
| Down | ENSMUSG00000083837 | -4.53 | 5.65E-03 | Gm14427    | processed_pseudogene | 2.75 | 2.43 | 2.15 | 2.49 | 2.00 | 2.00 | 2.00 | 2.00 |
| Down | ENSMUSG00000081497 | -3.85 | 5.74E-03 | Gm15560    | processed_pseudogene | 2.43 | 2.55 | 3.01 | 2.86 | 2.00 | 2.00 | 2.24 | 2.00 |
| Down | ENSMUSG00000066809 | -3.37 | 5.76E-03 | Gm10180    | processed_pseudogene | 2.75 | 2.55 | 2.54 | 2.38 | 2.13 | 2.12 | 2.00 | 2.00 |
| Down | ENSMUSG00000108226 | -3.71 | 5.89E-03 | Gm44063    | processed_pseudogene | 2.00 | 2.30 | 2.29 | 2.49 | 2.00 | 2.00 | 2.00 | 2.00 |
| Down | ENSMUSG00000084213 | -2.57 | 5.91E-03 | Hspe1-ps5  | processed_pseudogene | 2.65 | 3.03 | 3.16 | 2.49 | 2.00 | 2.00 | 2.45 | 2.24 |
| Down | ENSMUSG00000083287 | -4.31 | 5.96E-03 | Gm13502    | processed_pseudogene | 3.02 | 2.00 | 2.15 | 2.27 | 2.00 | 2.00 | 2.00 | 2.00 |
| Down | ENSMUSG00000050500 | -2.73 | 6.08E-03 | Gm11868    | processed_pseudogene | 3.10 | 3.52 | 2.64 | 3.21 | 2.37 | 2.34 | 2.00 | 2.24 |
| Down | ENSMUSG00000108547 | -2.86 | 6.10E-03 | Gm45186    | processed_pseudogene | 2.16 | 3.26 | 2.64 | 2.69 | 2.37 | 2.00 | 2.13 | 2.00 |
| Down | ENSMUSG00000085791 | -4.41 | 6.11E-03 | Rp30-ps9   | processed_pseudogene | 2.16 | 2.30 | 2.74 | 2.49 | 2.00 | 2.00 | 2.00 | 2.00 |
| Up   | ENSMUSG00000113753 | 3.95  | 6.18E-03 | Gm5791     | processed_pseudogene | 2.00 | 2.00 | 2.15 | 2.14 | 2.53 | 3.29 | 2.86 | 2.78 |
| Down | ENSMUSG00000082110 | -3.89 | 6.21E-03 | Gm11196    | processed_pseudogene | 2.30 | 2.00 | 2.64 | 2.27 | 2.00 | 2.00 | 2.00 | 2.00 |
| Down | ENSMUSG00000111626 | -3.91 | 6.30E-03 | Gm48738    | processed_pseudogene | 2.00 | 2.76 | 2.42 | 2.00 | 2.00 | 2.00 | 2.00 | 2.00 |
| Down | ENSMUSG00000058073 | -4.92 | 6.36E-03 | Gm11189    | processed_pseudogene | 2.43 | 2.66 | 3.70 | 2.27 | 2.00 | 2.12 | 2.00 | 2.00 |
| Up   | ENSMUSG00000044751 | 1.01  | 6.44E-03 | Gm12231    | processed_pseudogene | 3.18 | 3.46 | 3.30 | 3.33 | 3.60 | 3.69 | 4.63 | 3.85 |
| Down | ENSMUSG00000100825 | -4.42 | 6.47E-03 | ltpa-ps2   | processed_pseudogene | 2.30 | 2.16 | 2.84 | 2.38 | 2.00 | 2.00 | 2.00 | 2.00 |
| Down | ENSMUSG00000116535 | -3.11 | 6.49E-03 | Gm5962     | processed_pseudogene | 2.85 | 2.76 | 3.21 | 3.21 | 2.13 | 2.00 | 2.13 | 2.24 |
| Down | ENSMUSG00000086842 | -1.76 | 6.53E-03 | Gm15681    | processed_pseudogene | 3.50 | 3.52 | 3.36 | 3.50 | 2.57 | 3.33 | 2.00 | 2.12 |
| Down | ENSMUSG00000090855 | -3.37 | 6.58E-03 | Gm17219    | processed_pseudogene | 2.75 | 3.03 | 2.93 | 2.27 | 2.00 | 2.12 | 2.00 | 2.12 |
| Down | ENSMUSG00000114110 | -2.86 | 6.58E-03 | Gm46379    | processed_pseudogene | 2.54 | 2.76 | 2.54 | 2.49 | 2.00 | 2.00 | 2.24 | 2.12 |
| Down | ENSMUSG00000110318 | -2.72 | 6.58E-03 | Gm2767     | processed_pseudogene | 3.18 | 2.30 | 2.64 | 3.33 | 2.00 | 2.00 | 2.00 | 2.62 |
| Down | ENSMUSG00000085711 | -5.08 | 6.61E-03 | Gm15163    | processed_pseudogene | 2.16 | 2.76 | 2.42 | 3.08 | 2.00 | 2.00 | 2.00 | 2.00 |
| Down | ENSMUSG00000022265 | -4.02 | 6.65E-03 | Gm15547    | processed_pseudogene | 2.16 | 2.16 | 2.42 | 2.16 | 2.00 | 2.00 | 2.00 | 2.00 |
| Down | ENSMUSG00000109558 | -3.81 | 6.68E-03 | Gm45100    | processed_pseudogene | 2.65 | 2.43 | 2.65 | 2.38 | 2.00 | 2.00 | 2.12 | 2.00 |
| Down | ENSMUSG00000082402 | -3.81 | 6.78E-03 | Gm15621    | processed_pseudogene | 2.54 | 2.43 | 2.54 | 2.38 | 2.00 | 2.00 | 2.00 | 2.12 |
| Down | ENSMUSG00000072940 | -1.71 | 6.85E-03 | Gm10443    | processed_pseudogene | 3.56 | 3.63 | 3.70 | 3.39 | 3.40 | 2.12 | 2.45 | 2.44 |
| Down | ENSMUSG00000081583 | -2.34 | 6.87E-03 | Gm14769    | processed_pseudogene | 2.65 | 2.66 | 3.01 | 2.69 | 2.00 | 2.00 | 2.62 | 2.62 |
| Down | ENSMUSG00000082809 | -1.87 | 6.91E-03 | Gm14150    | processed_pseudogene | 3.44 | 3.26 | 2.29 | 3.21 | 2.13 | 2.34 | 2.54 | 2.54 |
| Down | ENSMUSG00000058838 | -2.52 | 6.92E-03 | Rps27a-ps2 | processed_pseudogene | 2.00 | 2.86 | 2.74 | 2.69 | 2.13 | 2.34 | 2.00 | 2.00 |
| Down | ENSMUSG00000100215 | -1.29 | 6.93E-03 | Gm8292     | processed_pseudogene | 4.15 | 3.92 | 4.27 | 4.65 | 4.13 | 3.11 | 2.86 | 2.99 |
| Down | ENSMUSG00000111382 | -3.87 | 6.95E-03 | Gm47536    | processed_pseudogene | 2.30 | 2.16 | 2.29 | 2.49 | 2.00 | 2.00 | 2.00 | 2.00 |
| Down | ENSMUSG00000112808 | -4.47 | 6.98E-03 | Gm4739     | processed_pseudogene | 3.10 | 2.55 | 2.54 | 2.49 | 2.00 | 2.12 | 2.00 | 2.00 |
| Down | ENSMUSG00000081732 | -3.74 | 7.04E-03 | Gm15495    | processed_pseudogene | 2.54 | 2.86 | 2.64 | 2.69 | 2.00 | 2.00 | 2.24 | 2.00 |
| Down | ENSMUSG00000111684 | -4.21 | 7.09E-03 | Gm8543     | processed_pseudogene | 2.94 | 3.63 | 2.54 | 2.13 | 2.00 | 2.24 | 2.00 | 2.00 |
| Down | ENSMUSG00000091449 | -1.39 | 7.21E-03 | Gm10269    | processed_pseudogene | 3.72 | 3.39 | 3.60 | 3.50 | 2.24 | 2.45 | 2.45 | 2.70 |
| Down | ENSMUSG00000081798 | -1.05 | 7.21E-03 | Gm9762     | processed_pseudogene | 3.72 | 4.44 | 4.37 | 4.63 | 3.97 | 3.69 | 4.00 | 3.34 |
| Down | ENSMUSG00000101729 | -2.94 | 7.26E-03 | Gm17796    | processed_pseudogene | 2.94 | 2.55 | 3.01 | 3.44 | 2.00 | 2.00 | 2.44 | 2.00 |
| Down | ENSMUSG00000082666 | -4.04 | 7.31E-03 | Gm13677    | processed_pseudogene | 2.16 | 2.43 | 2.42 | 2.38 | 2.00 | 2.00 | 2.00 | 2.00 |
| Down | ENSMUSG00000083555 | -4.20 | 7.37E-03 | Gm12035    | processed_pseudogene | 2.00 | 2.86 | 2.29 | 2.00 | 2.00 | 2.00 | 2.00 | 2.00 |
| Down | ENSMUSG00000089886 | -2.64 | 7.43E-03 | Gm16184    | processed_pseudogene | 2.16 | 2.95 | 3.16 | 3.08 | 2.00 | 2.00 | 2.35 | 2.34 |
| Down | ENSMUSG00000083207 | -2.19 | 7.46E-03 | Gm14780    | processed_pseudogene | 3.02 | 2.16 | 3.01 | 3.60 | 2.82 | 2.00 | 2.00 | 2.60 |
| Down | ENSMUSG00000091784 | -1.54 | 7.56E-03 | Gm17022    | processed_pseudogene | 3.61 | 2.95 | 3.23 | 3.74 | 3.04 | 2.00 | 2.79 | 2.62 |
| Down | ENSMUSG00000112680 | -3.22 | 7.61E-03 | Gm48760    | processed_pseudogene | 3.02 | 2.66 | 2.42 | 2.69 | 2.00 | 2.00 | 2.34 | 2.00 |
| Down | ENSMUSG00000111356 | -1.97 | 7.63E-03 | Rpl32l     | processed_pseudogene | 2.30 | 2.76 | 3.43 | 2.69 | 2.13 | 2.53 | 2.13 | 2.24 |
| Down | ENSMUSG00000112349 | -2.96 | 7.65E-03 | Gm48132    | processed_pseudogene | 2.00 | 3.68 | 3.75 | 3.08 | 2.00 | 2.12 | 2.54 | 2.34 |
| Down | ENSMUSG00000082784 | -3.85 | 7.69E-03 | Gm15957    | processed_pseudogene | 2.00 | 3.33 | 2.15 | 2.00 | 2.00 | 2.00 | 2.13 | 2.00 |
| Down | ENSMUSG00000113497 | -1.86 | 7.91E-03 | Gm18030    | processed_pseudogene | 2.65 | 3.68 | 3.23 | 2.86 | 3.05 | 2.00 | 2.34 | 2.00 |
| Down | ENSMUSG00000083505 | -4.76 | 7.98E-03 | Gm7541     | processed_pseudogene | 2.65 | 2.30 | 2.00 | 3.01 | 2.00 | 2.00 | 2.00 | 2.00 |
| Down | ENSMUSG00000081798 | -2.88 | 8.06E-03 | Gm8152     | processed_pseudogene | 2.54 | 2.76 | 3.09 | 2.49 | 2.00 | 2.34 | 2.00 | 2.12 |
| Down | ENSMUSG00000092132 | -3.71 | 8.26E-03 | Gm13541    | processed_pseudogene | 2.43 | 2.16 | 2.15 | 2.38 | 2.00 | 2.00 | 2.00 | 2.00 |
| Down | ENSMUSG00000109069 | -5.53 | 8.27E-03 | Gm2734     | processed_pseudogene | 3.02 | 2.43 | 3.16 | 2.69 | 2.00 | 2.00 | 2.00 | 2.00 |
| Down | ENSMUSG00000094017 | -3.17 | 8.30E-03 | Gm13160    | processed_pseudogene | 4.80 | 4.56 | 4.52 | 4.50 | 2.24 | 2.24 | 3.48 | 3.48 |
| Down | ENSMUSG00000085276 | -1.96 | 8.41E-03 | Gm15812    | processed_pseudogene | 2.54 | 3.68 | 3.09 | 2.86 | 2.00 | 3.05 | 2.00 | 2.12 |
| Down | ENSMUSG00000113072 | -3.70 | 8.42E-03 | Gm47820    | processed_pseudogene | 2.30 | 2.55 | 2.42 | 2.49 | 2.00 | 2.00 | 2.00 | 2.12 |
| Down | ENSMUSG00000103964 | -2.27 | 8.44E-03 | Gm8407     | processed_pseudogene | 3.25 | 3.03 | 3.54 | 2.94 | 2.00 | 2.00 | 2.24 | 2.92 |
| Up   | ENSMUSG00000098076 | 1.56  | 8.46E-03 | Gm6981     | processed_pseudogene | 3.02 | 3.03 | 3.43 | 2.94 | 3.55 | 3.94 | 4.67 | 4.20 |
| Down | ENSMUSG00000108036 | -3.01 | 8.48E-03 | Gm43967    | processed_pseudogene | 2.30 | 2.43 | 3.01 | 2.69 | 2.00 | 2.24 | 2.00 | 2.12 |
| Down | ENSMUSG00000104162 | -5.85 | 8.52E-03 | Gm37819    | processed_pseudogene | 3.10 | 2.95 | 2.84 | 3.01 | 2.00 | 2.00 | 2.00 | 2.00 |
| Down | ENSMUSG00000090319 | -4.18 | 8.52E-03 | Gm4462     | processed_pseudogene | 2.65 | 2.66 | 2.54 | 2.49 | 2.00 | 2.00 | 2.12 | 2.00 |
| Down | ENSMUSG00000103658 | -3.28 | 8.53E-03 | Gm37201    | processed_pseudogene | 2.54 | 2.66 | 2.54 | 2.00 | 2.00 | 2.24 | 2.00 | 2.12 |
| Down | ENSMUSG00000080914 | -4.27 | 8.56E-03 | Gm7129     | processed_pseudogene | 2.54 | 2.55 | 3.36 | 3.01 | 2.00 | 2.00 | 2.24 | 2.00 |
| Down | ENSMUSG00000116093 | -2.04 | 8.58E-03 | Gm3888     | processed_pseudogene | 3.18 | 2.95 | 2.54 | 3.08 | 2.13 | 2.12 | 2.54 | 2.34 |
| Down | ENSMUSG00000106006 | -4.27 | 8.69E-03 | Gm17351    | processed_pseudogene | 2.27 | 2.16 | 2.29 | 2.43 | 2.69 | 2.00 | 2.00 | 2.00 |
| Down | ENSMUSG00000081861 | -2.40 | 8.71E-03 | Gm14441    | processed_pseudogene | 3.10 | 2.76 | 2.54 | 2.69 | 2.00 | 2.00 | 2.00 | 2.62 |
| Down | ENSMUSG00000024205 | -1.65 | 8.77E-03 | Rpl36-ps2  | processed_pseudogene | 2.43 | 2.95 | 2.84 | 2.86 | 2.13 | 2.00 | 2.35 | 2.86 |
| Down | ENSMUSG00000081739 | -4.81 | 8.80E-03 | Mdm4-ps    | processed_pseudogene | 2.75 | 2.86 | 3.84 | 4.19 | 2.00 | 2.00 | 2.34 | 2.00 |
| Down | ENSMUSG00000114500 | -1.60 | 8.88E-03 | Gm8983     | processed_pseudogene | 2.65 | 3.19 | 3.23 | 3.21 | 2.44 | 2.44 | 2.35 | 2.62 |
| Down | ENSMUSG00000109367 | -1.65 | 8.96E-03 | Gm18782    | processed_pseudogene | 4.18 | 3.39 | 3.54 | 3.82 | 3.40 | 2.00 | 2.63 | 2.20 |
| Down | ENSMUSG00000113080 | -2.69 | 8.97E-03 | Gm48928    | processed_pseudogene | 3.18 | 2.86 | 3.80 | 3.21 | 2.13 | 2.00 | 2.00 | 2.85 |
| Down | ENSMUSG00000083458 | -2.74 | 9.04E-03 | Gm5510     | processed_pseudogene | 3.10 | 2.43 | 2.64 | 2.49 | 2.13 | 2.12 | 2.13 | 2.12 |
| Down | ENSMUSG00000083258 | -2.37 | 9.04E-03 | Gm5939     | processed_pseudogene | 3.31 | 3.11 | 4.60 | 3.45 | 2.25 | 2.00 | 2.93 | 2.78 |
| Down | ENSMUSG00000089648 | -3.29 | 9.08E-03 | Gm15790    | processed_pseudogene | 2.75 | 2.76 | 2.64 | 2.77 | 2.00 | 2.34 | 2.00 | 2.00 |
| Down | ENSMUSG00000099492 | -1.59 | 9.12E-03 | Gm5525     | processed_pseudogene | 3.50 | 3.03 | 3.49 | 2.13 | 2.39 | 2.85 | 2.35 | 2.92 |
| Down | ENSMUSG00000107411 | -1.61 | 9.13E-03 | Gm19040    | processed_pseudogene | 4.57 | 4.27 | 4.09 | 4.25 | 2.66 | 3.52 | 2.00 | 3.89 |
| Down | ENSMUSG00000083771 | -4.65 | 9.22E-03 | Gm15988    | processed_pseudogene | 3.61 | 2.30 | 2.00 | 2.59 | 2.00 | 2.00 | 2.00 | 2.12 |
| Down | ENSMUSG00000083949 | -2.55 | 9.22E-03 | Gm         |                      |      |      |      |      |      |      |      |      |

|      |                    |       |           |               |                      |       |       |       |       |      |      |      |      |
|------|--------------------|-------|-----------|---------------|----------------------|-------|-------|-------|-------|------|------|------|------|
| Down | ENSMUSG00000083154 | -2.49 | 9.42E-03  | Gm11892       | processed_pseudogene | 2.16  | 3.26  | 3.16  | 3.50  | 2.00 | 2.00 | 2.24 | 2.70 |
| Down | ENSMUSG00000083995 | -3.78 | 9.60E-03  | Gm12808       | processed_pseudogene | 2.00  | 2.30  | 2.74  | 2.69  | 2.00 | 2.00 | 2.00 | 2.12 |
| Down | ENSMUSG00000114993 | -3.49 | 9.62E-03  | Gm6363        | processed_pseudogene | 2.16  | 2.30  | 2.54  | 3.15  | 2.00 | 2.00 | 2.13 | 2.12 |
| Down | ENSMUSG00000114557 | -3.22 | 9.64E-03  | Gm8345        | processed_pseudogene | 3.38  | 3.88  | 2.84  | 2.84  | 2.25 | 2.00 | 2.13 | 2.44 |
| Down | ENSMUSG00000082351 | -5.02 | 9.65E-03  | Gm11260       | processed_pseudogene | 2.65  | 2.55  | 2.42  | 2.86  | 2.00 | 2.00 | 2.00 | 2.00 |
| Down | ENSMUSG00000108833 | -2.45 | 9.70E-03  | Gm17909       | processed_pseudogene | 3.02  | 2.30  | 3.49  | 2.94  | 2.00 | 2.00 | 2.00 | 2.78 |
| Down | ENSMUSG00000093939 | -5.13 | 9.76E-03  | Gm4663        | processed_pseudogene | 3.31  | 3.30  | 2.30  | 3.50  | 2.00 | 2.00 | 2.00 | 2.00 |
| Down | ENSMUSG00000083150 | -4.94 | 9.78E-03  | Gm11852       | processed_pseudogene | 2.94  | 2.55  | 2.93  | 3.08  | 2.00 | 2.00 | 2.12 | 2.00 |
| Down | ENSMUSG00000083903 | -4.53 | 9.78E-03  | Gm5405        | processed_pseudogene | 2.30  | 2.43  | 3.60  | 3.39  | 2.00 | 2.00 | 2.00 | 2.24 |
| Down | ENSMUSG00000083745 | -1.46 | 9.82E-03  | Gm13543       | processed_pseudogene | 3.10  | 3.52  | 3.30  | 3.60  | 2.00 | 3.22 | 2.93 | 2.12 |
| Down | ENSMUSG00000111693 | -4.15 | 9.88E-03  | Gm47986       | processed_pseudogene | 2.30  | 2.00  | 2.54  | 2.59  | 2.00 | 2.00 | 2.00 | 2.00 |
| Down | ENSMUSG00000082873 | -4.81 | 9.96E-03  | Gm15367       | processed_pseudogene | 2.00  | 2.00  | 3.43  | 2.27  | 2.00 | 2.00 | 2.00 | 2.00 |
| Down | ENSMUSG00000109584 | -2.69 | 9.99E-03  | Gm7997        | processed_pseudogene | 3.18  | 2.55  | 3.54  | 3.01  | 2.00 | 2.53 | 2.00 | 2.34 |
| Down | ENSMUSG00000109967 | -2.86 | 9.85E-219 | Gm45883       | processed_transcript | 9.88  | 9.64  | 9.87  | 9.65  | 7.04 | 6.80 | 6.92 | 7.04 |
| Down | ENSMUSG00000097451 | -2.07 | 9.40E-208 | Rlan          | processed_transcript | 11.45 | 11.59 | 11.48 | 11.75 | 9.55 | 9.48 | 9.52 | 9.49 |
| Down | ENSMUSG00000079499 | -3.00 | 3.63E-128 | 6530402F18Rik | processed_transcript | 8.36  | 8.10  | 8.44  | 8.28  | 4.99 | 5.32 | 5.61 | 5.67 |
| Down | ENSMUSG00000079671 | -2.73 | 1.78E-85  | 2610203C22Rik | processed_transcript | 8.31  | 8.39  | 8.32  | 8.18  | 5.71 | 4.96 | 6.00 | 5.83 |
| Down | ENSMUSG00000110080 | -2.71 | 3.99E-61  | Gm6145        | processed_transcript | 6.70  | 6.95  | 6.80  | 6.72  | 3.89 | 4.32 | 4.54 | 4.53 |
| Down | ENSMUSG00000097247 | -4.02 | 4.24E-60  | 1500012K07Rik | processed_transcript | 6.77  | 6.69  | 6.69  | 6.45  | 4.00 | 3.47 | 2.35 | 2.99 |
| Down | ENSMUSG00000097428 | -3.35 | 4.85E-53  | AW047730      | processed_transcript | 7.07  | 7.04  | 6.96  | 6.96  | 7.19 | 4.60 | 3.24 | 4.50 |
| Down | ENSMUSG00000053322 | -1.62 | 4.22E-50  | Gas5          | processed_transcript | 9.16  | 9.30  | 9.28  | 9.49  | 7.46 | 7.91 | 7.82 | 7.60 |
| Down | ENSMUSG00000097493 | -2.77 | 1.39E-44  | 9930014A18Rik | processed_transcript | 7.11  | 6.97  | 7.18  | 6.90  | 4.92 | 3.87 | 4.40 | 4.66 |
| Down | ENSMUSG00000090386 | -2.21 | 2.45E-38  | Mir99ahg      | processed_transcript | 6.41  | 6.71  | 6.52  | 6.40  | 4.06 | 4.27 | 5.05 | 4.48 |
| Down | ENSMUSG00000085944 | -2.54 | 8.94E-37  | 1700030D09Rik | processed_transcript | 7.20  | 7.09  | 6.73  | 7.17  | 4.39 | 5.07 | 3.94 | 5.13 |
| Down | ENSMUSG00000087059 | -2.60 | 6.25E-36  | Gm12339       | processed_transcript | 6.40  | 6.23  | 6.66  | 6.36  | 3.89 | 4.40 | 3.67 | 4.25 |
| Down | ENSMUSG00000085566 | -1.57 | 4.14E-30  | A730017L22Rik | processed_transcript | 7.70  | 7.97  | 8.03  | 7.94  | 6.48 | 6.37 | 6.38 | 6.34 |
| Up   | ENSMUSG00000086496 | 2.08  | 6.79E-29  | Gm14204       | processed_transcript | 5.76  | 5.58  | 5.50  | 5.49  | 7.67 | 7.80 | 7.17 | 7.58 |
| Down | ENSMUSG00000024845 | -1.48 | 6.83E-28  | Tmem134       | processed_transcript | 6.86  | 6.74  | 6.91  | 6.59  | 5.50 | 5.36 | 5.27 | 5.44 |
| Down | ENSMUSG00000104960 | -2.32 | 1.40E-27  | Snhg8         | processed_transcript | 6.50  | 6.53  | 6.57  | 6.81  | 4.47 | 5.11 | 3.63 | 4.43 |
| Down | ENSMUSG00000085241 | -2.74 | 2.18E-24  | Snhg3         | processed_transcript | 6.24  | 6.31  | 6.12  | 6.38  | 3.35 | 3.77 | 4.40 | 3.89 |
| Down | ENSMUSG00000116305 | -2.88 | 2.31E-24  | Lncppara      | processed_transcript | 4.72  | 5.21  | 5.29  | 5.31  | 2.97 | 2.24 | 3.07 | 3.62 |
| Down | ENSMUSG00000087022 | -2.66 | 1.19E-23  | 9130024F11Rik | processed_transcript | 6.15  | 5.90  | 6.46  | 6.08  | 4.61 | 3.11 | 4.10 | 3.17 |
| Down | ENSMUSG00000097369 | -1.98 | 7.35E-21  | Gm17144       | processed_transcript | 5.65  | 5.68  | 5.67  | 5.67  | 3.17 | 4.36 | 4.40 | 4.36 |
| Down | ENSMUSG00000097195 | -2.13 | 2.81E-20  | Snhg5         | processed_transcript | 5.28  | 5.68  | 5.53  | 5.30  | 4.10 | 3.33 | 3.71 | 3.62 |
| Up   | ENSMUSG00000085179 | 1.33  | 3.38E-20  | Gm13645       | processed_transcript | 7.22  | 7.07  | 7.16  | 7.23  | 8.63 | 8.62 | 8.25 | 8.38 |
| Up   | ENSMUSG00000099329 | 1.03  | 4.36E-20  | Gm28052       | processed_transcript | 7.77  | 7.91  | 7.61  | 7.63  | 8.98 | 8.67 | 8.74 | 8.58 |
| Down | ENSMUSG00000106943 | -3.27 | 3.51E-19  | Dancr         | processed_transcript | 4.29  | 4.95  | 4.46  | 4.80  | 2.00 | 3.05 | 2.63 | 2.62 |
| Down | ENSMUSG00000085058 | -3.04 | 1.47E-18  | 8030453O22Rik | processed_transcript | 5.06  | 5.28  | 5.11  | 4.74  | 2.66 | 3.43 | 2.35 | 2.99 |
| Up   | ENSMUSG00000084899 | 1.05  | 2.85E-18  | Gm15344       | processed_transcript | 8.51  | 8.44  | 8.20  | 8.19  | 9.64 | 9.32 | 9.18 | 9.37 |
| Up   | ENSMUSG00000087306 | 1.03  | 1.24E-17  | A230004M16Rik | processed_transcript | 7.91  | 7.57  | 7.60  | 7.65  | 8.70 | 8.55 | 8.91 | 8.64 |
| Down | ENSMUSG00000110148 | -3.49 | 2.67E-17  | 583040C22Rik  | processed_transcript | 5.90  | 5.66  | 5.80  | 5.27  | 2.25 | 2.70 | 3.30 | 3.53 |
| Down | ENSMUSG00000092492 | -3.82 | 2.48E-16  | B230208B08Rik | processed_transcript | 4.67  | 4.82  | 4.80  | 4.82  | 2.37 | 2.42 | 2.12 | 2.45 |
| Down | ENSMUSG00000085586 | -1.57 | 1.55E-15  | Gm11613       | processed_transcript | 6.05  | 5.92  | 6.55  | 6.21  | 5.14 | 4.24 | 4.99 | 4.59 |
| Up   | ENSMUSG00000096992 | 1.27  | 1.87E-15  | Gm26788       | processed_transcript | 7.23  | 7.41  | 6.96  | 7.02  | 8.58 | 8.55 | 7.69 | 8.64 |
| Down | ENSMUSG00000097311 | -2.64 | 6.68E-15  | Gm26871       | processed_transcript | 5.41  | 5.47  | 5.97  | 5.94  | 2.57 | 3.84 | 3.00 | 4.23 |
| Down | ENSMUSG00000097746 | -1.86 | 1.25E-14  | Gm6225        | processed_transcript | 5.61  | 5.58  | 5.78  | 5.89  | 4.54 | 3.84 | 3.67 | 4.28 |
| Down | ENSMUSG00000097587 | -2.61 | 2.55E-14  | 4930578M01Rik | processed_transcript | 6.03  | 5.98  | 6.13  | 6.29  | 4.78 | 4.78 | 3.00 | 4.44 |
| Down | ENSMUSG00000108414 | -1.82 | 1.03E-13  | Snhg1         | processed_transcript | 5.95  | 5.78  | 5.83  | 5.73  | 3.92 | 3.98 | 4.43 | 4.55 |
| Down | ENSMUSG00000088600 | -3.05 | 2.32E-13  | C030005K06Rik | processed_transcript | 4.45  | 4.64  | 4.46  | 4.46  | 2.90 | 2.62 | 2.54 | 2.54 |
| Down | ENSMUSG00000073274 | -2.08 | 3.20E-13  | Gm14636       | processed_transcript | 4.72  | 4.64  | 4.54  | 4.63  | 2.82 | 3.65 | 2.93 | 3.06 |
| Up   | ENSMUSG00000086062 | 1.33  | 2.14E-12  | Gm14164       | processed_transcript | 6.30  | 6.50  | 6.46  | 6.51  | 7.55 | 7.81 | 7.93 | 7.61 |
| Down | ENSMUSG00000106636 | -4.55 | 7.96E-12  | Gm43813       | processed_transcript | 3.99  | 4.05  | 3.97  | 4.25  | 2.00 | 2.00 | 2.00 | 2.62 |
| Down | ENSMUSG00000097589 | -1.97 | 2.15E-11  | Dleu2         | processed_transcript | 6.49  | 6.84  | 6.84  | 6.77  | 4.54 | 5.37 | 3.90 | 5.38 |
| Up   | ENSMUSG00000112343 | 1.48  | 5.08E-11  | Sfta3-ps      | processed_transcript | 5.81  | 5.43  | 5.77  | 5.94  | 7.18 | 6.76 | 7.35 | 7.29 |
| Down | ENSMUSG00000098302 | -1.02 | 9.23E-11  | Gm28039       | processed_transcript | 7.45  | 6.97  | 7.33  | 7.08  | 6.30 | 6.19 | 6.35 | 6.09 |
| Down | ENSMUSG00000087396 | -1.79 | 2.33E-10  | 4933407K13Rik | processed_transcript | 4.93  | 5.19  | 5.61  | 5.44  | 3.23 | 3.80 | 3.90 | 4.25 |
| Down | ENSMUSG00000114469 | -1.88 | 3.05E-10  | C730002L08Rik | processed_transcript | 5.00  | 4.97  | 5.05  | 5.17  | 2.74 | 3.87 | 3.90 | 3.48 |
| Down | ENSMUSG00000097583 | -1.46 | 5.56E-10  | 6430590A07Rik | processed_transcript | 5.04  | 4.97  | 5.87  | 5.31  | 4.19 | 4.13 | 3.63 | 4.41 |
| Up   | ENSMUSG00000085884 | 1.01  | 7.77E-10  | Gm15342       | processed_transcript | 5.19  | 4.74  | 5.38  | 4.94  | 5.68 | 6.04 | 6.28 | 5.97 |
| Down | ENSMUSG00000085314 | -5.43 | 9.12E-10  | Gm14866       | processed_transcript | 3.99  | 3.92  | 4.37  | 4.78  | 2.25 | 2.00 | 2.24 | 2.24 |
| Down | ENSMUSG00000090576 | -3.32 | 1.38E-09  | Gm17055       | processed_transcript | 4.36  | 4.13  | 3.54  | 4.12  | 2.13 | 2.62 | 2.24 | 2.54 |
| Down | ENSMUSG00000097430 | -2.66 | 2.56E-09  | Gm10544       | processed_transcript | 3.38  | 3.06  | 4.30  | 4.31  | 2.37 | 2.24 | 3.40 | 2.62 |
| Down | ENSMUSG00000093497 | -2.23 | 3.56E-09  | Gm20713       | processed_transcript | 4.77  | 5.19  | 5.07  | 4.94  | 3.45 | 2.44 | 3.63 | 3.48 |
| Down | ENSMUSG00000085385 | -1.26 | 5.64E-09  | Snhg17        | processed_transcript | 5.39  | 5.66  | 6.11  | 5.60  | 4.13 | 4.96 | 4.40 | 4.77 |
| Down | ENSMUSG00000108659 | -2.42 | 9.49E-09  | Gm34121       | processed_transcript | 4.18  | 4.50  | 4.30  | 4.58  | 3.17 | 3.05 | 2.24 | 2.78 |
| Down | ENSMUSG00000113585 | -2.38 | 2.52E-08  | Gm19605       | processed_transcript | 3.50  | 4.47  | 4.46  | 4.39  | 2.25 | 2.34 | 2.63 | 3.53 |
| Down | ENSMUSG00000056031 | -2.22 | 3.20E-08  | 9330154J02Rik | processed_transcript | 4.51  | 4.82  | 4.63  | 5.09  | 3.11 | 3.73 | 2.54 | 3.06 |
| Down | ENSMUSG00000085151 | -1.40 | 3.27E-08  | 1110018N20Rik | processed_transcript | 5.68  | 5.60  | 5.60  | 5.40  | 3.85 | 3.94 | 4.33 | 4.95 |
| Down | ENSMUSG00000088641 | -1.06 | 3.34E-08  | 2410006H16Rik | processed_transcript | 6.70  | 6.69  | 6.78  | 7.07  | 5.19 | 6.40 | 5.67 | 5.71 |
| Down | ENSMUSG00000087253 | -1.77 | 3.64E-08  | Gm12043       | processed_transcript | 5.06  | 5.06  | 4.89  | 5.31  | 3.73 | 3.05 | 4.10 | 3.66 |
| Down | ENSMUSG00000092203 | -1.47 | 4.88E-08  | 1110038B12Rik | processed_transcript | 5.34  | 5.46  | 5.34  | 5.40  | 4.90 | 4.19 | 3.50 | 3.57 |
| Up   | ENSMUSG00000110067 | 3.21  | 7.11E-08  | 6330411D24Rik | processed_transcript | 2.16  | 2.66  | 3.16  | 2.69  | 4.36 | 5.13 | 4.35 | 5.11 |
| Down | ENSMUSG00000085929 | -1.25 | 7.45E-08  | A330023F24Rik | processed_transcript | 7.74  | 7.79  | 7.61  | 7.94  | 7.18 | 6.04 | 5.63 | 6.51 |
| Down | ENSMUSG00000097063 | -2.28 | 1.03E-07  | Fan2          | processed_transcript | 3.99  | 4.01  | 4.19  | 4.12  | 3.40 | 2.62 | 2.79 | 2.62 |
| Down | ENSMUSG00000097585 | -1.49 | 1.07E-07  | E230029C05Rik | processed_transcript | 5.38  | 5.92  | 5.34  | 4.96  | 3.29 | 4.58 | 4.20 | 4.20 |
| Down | ENSMUSG00000097028 | -2.65 | 1.20E-07  | Pigs2os       | processed_transcript | 4.45  | 4.37  | 3.70  | 4.34  | 2.57 | 2.24 | 3.07 | 2.70 |
| Down | ENSMUSG00000097178 | -3.27 | 1.69E-07  | 2310002F09Rik | processed_transcript | 5.34  | 5.49  | 5.98  | 5.49  | 2.00 | 3.56 | 2.93 | 3.44 |
| Down | ENSMUSG00000086629 | -2.10 | 1.71E-07  | 2810403D21Rik | processed_transcript | 4.77  | 4.53  | 5.46  | 4.70  | 2.57 | 3.05 | 3.63 | 3.78 |
| Down | ENSMUSG00000087347 | -2.45 | 2.04E-07  | 1700047K16Rik | processed_transcript | 3.72  | 4.77  | 3.65  | 4.25  | 2.57 | 3.13 | 2.92 | 2.92 |
| Down | ENSMUSG00000102009 | -2.03 | 2.10E-07  | 4933400F21Rik | processed_transcript | 4.15  | 4.69  | 3.89  | 3.98  | 2.00 | 2.53 | 3.30 | 3.39 |
| Down | ENSMUSG00000087400 | -1.42 | 2.15E-07  | Gm15270       | processed_transcript | 5.79  | 5.47  | 5.66  | 5.19  | 4.64 | 4.07 | 3.67 | 4.46 |
| Down | ENSMUSG00000087355 | -2.83 | 3.15E-07  | Gm13187       | processed_transcript | 3.72  | 3.63  | 3.84  | 3.65  | 2.13 | 2.78 | 2.00 | 2.54 |
| Down | ENSMUSG00000100280 | -3.73 | 3.30E-07  | Gm28417       | processed_transcript | 4.54  | 3.83  | 3.65  | 4.31  | 2.00 | 2.00 | 2.62 | 4.31 |
| Down | ENSMUSG00000089827 | -2.65 | 3.82E-07  | 1700023H06Rik | processed_transcript | 3.77  | 3.97  | 3.97  | 4.05  | 2.00 | 2.92 | 2.00 | 2.92 |
| Down | ENSMUSG00000073067 | -1.05 | 4.05E-07  | 9130019P16Rik | processed_transcript | 7.98  | 7.72  | 8.03  | 7.45  | 6.74 |      |      |      |

|      |                    |       |          |               |                      |      |      |      |      |      |      |      |      |
|------|--------------------|-------|----------|---------------|----------------------|------|------|------|------|------|------|------|------|
| Up   | ENSMUSG0000054457  | 1.11  | 1.77E-06 | 9430021M05Rik | processed_transcript | 4.72 | 4.89 | 4.63 | 4.85 | 5.34 | 5.93 | 5.76 | 5.96 |
| Down | ENSMUSG00000113856 | -2.94 | 2.19E-06 | Gm10790       | processed_transcript | 4.42 | 4.56 | 4.43 | 4.02 | 2.00 | 3.33 | 2.24 | 2.54 |
| Down | ENSMUSG00000100037 | -1.17 | 3.23E-06 | Gm29103       | processed_transcript | 5.34 | 5.68 | 5.37 | 5.02 | 4.54 | 4.32 | 4.24 | 4.33 |
| Down | ENSMUSG00000063018 | -1.30 | 3.76E-06 | 2010204K13Rik | processed_transcript | 6.84 | 6.86 | 7.07 | 7.14 | 4.61 | 6.19 | 5.80 | 5.81 |
| Up   | ENSMUSG00000114051 | 1.64  | 4.49E-06 | Gm48008       | processed_transcript | 3.86 | 3.63 | 3.97 | 3.69 | 3.69 | 4.54 | 5.19 | 5.33 |
| Down | ENSMUSG00000085088 | -2.44 | 5.61E-06 | 4931413K12Rik | processed_transcript | 3.50 | 3.68 | 3.65 | 2.86 | 2.00 | 2.44 | 2.00 | 2.92 |
| Down | ENSMUSG00000093967 | -1.78 | 6.62E-06 | Gm26261       | processed_transcript | 3.50 | 3.68 | 3.61 | 4.22 | 4.22 | 4.22 | 3.12 | 3.12 |
| Down | ENSMUSG00000105139 | -5.54 | 7.01E-06 | Gm19391       | processed_transcript | 3.44 | 2.66 | 3.23 | 2.66 | 2.13 | 2.00 | 2.00 | 2.00 |
| Down | ENSMUSG0000086477  | -1.59 | 7.96E-06 | Gm15506       | processed_transcript | 4.77 | 5.43 | 5.19 | 5.00 | 4.13 | 3.77 | 2.54 | 4.31 |
| Down | ENSMUSG00000085971 | -2.33 | 9.43E-06 | Gm15411       | processed_transcript | 4.39 | 4.20 | 4.68 | 4.19 | 2.00 | 3.56 | 2.00 | 3.23 |
| Down | ENSMUSG00000074578 | -1.17 | 1.11E-05 | Zfas1         | processed_transcript | 6.12 | 6.02 | 5.81 | 6.22 | 3.92 | 5.66 | 5.14 | 4.66 |
| Down | ENSMUSG00000046463 | -1.64 | 1.16E-05 | 5930403N24Rik | processed_transcript | 4.91 | 4.74 | 4.57 | 4.96 | 3.64 | 3.17 | 3.67 | 3.66 |
| Down | ENSMUSG00000055134 | -2.00 | 1.25E-05 | 9130017K11Rik | processed_transcript | 4.29 | 4.61 | 3.93 | 3.90 | 2.57 | 3.43 | 2.24 | 3.17 |
| Down | ENSMUSG00000073073 | -1.54 | 1.89E-05 | Gm8098        | processed_transcript | 4.39 | 4.24 | 4.27 | 3.86 | 2.66 | 2.98 | 3.63 | 3.17 |
| Down | ENSMUSG00000090193 | -4.92 | 2.52E-05 | Gm15995       | processed_transcript | 2.94 | 3.57 | 3.30 | 3.15 | 2.00 | 2.00 | 2.00 | 2.24 |
| Down | ENSMUSG00000116725 | -6.90 | 2.54E-05 | Gm29686       | processed_transcript | 3.67 | 3.33 | 3.93 | 3.33 | 2.00 | 3.33 | 2.00 | 2.00 |
| Down | ENSMUSG00000085741 | -1.32 | 2.89E-05 | 5430405H02Rik | processed_transcript | 4.72 | 4.82 | 5.73 | 5.49 | 3.50 | 4.04 | 4.24 | 4.59 |
| Down | ENSMUSG00000087113 | -3.68 | 3.42E-05 | Gm11714       | processed_transcript | 3.10 | 3.26 | 3.43 | 2.59 | 2.00 | 2.00 | 2.44 | 2.44 |
| Down | ENSMUSG00000093483 | -2.16 | 3.45E-05 | AA665934      | processed_transcript | 3.72 | 3.33 | 3.97 | 4.15 | 2.74 | 2.92 | 2.00 | 2.78 |
| Down | ENSMUSG00000085704 | -1.78 | 3.52E-05 | 4921831C22Rik | processed_transcript | 4.54 | 4.26 | 4.78 | 4.76 | 3.69 | 3.56 | 2.13 | 3.74 |
| Down | ENSMUSG00000084910 | -1.62 | 3.64E-05 | C630043F03Rik | processed_transcript | 5.78 | 5.68 | 5.68 | 4.58 | 4.58 | 4.58 | 2.71 | 4.59 |
| Down | ENSMUSG00000044021 | -2.41 | 5.11E-05 | Nuc19         | processed_transcript | 4.26 | 4.09 | 4.24 | 4.96 | 3.23 | 2.85 | 2.35 | 2.92 |
| Down | ENSMUSG00000085396 | -1.78 | 5.14E-05 | Gm13630       | processed_transcript | 4.03 | 4.13 | 4.01 | 4.19 | 2.00 | 3.52 | 3.07 | 2.85 |
| Down | ENSMUSG00000113226 | -4.41 | 5.21E-05 | Gm47808       | processed_transcript | 2.75 | 3.68 | 3.60 | 2.94 | 2.13 | 2.12 | 2.00 | 2.12 |
| Down | ENSMUSG00000108520 | -1.77 | 5.46E-05 | Gm44684       | processed_transcript | 4.29 | 3.97 | 3.75 | 3.55 | 2.13 | 2.85 | 2.93 | 3.23 |
| Down | ENSMUSG00000086946 | -2.16 | 5.52E-05 | Gm15527       | processed_transcript | 3.18 | 3.68 | 3.65 | 3.65 | 2.47 | 2.24 | 2.78 | 2.78 |
| Down | ENSMUSG00000086358 | -2.28 | 7.05E-05 | Gm13270       | processed_transcript | 4.18 | 4.67 | 3.97 | 4.22 | 2.82 | 3.52 | 2.00 | 4.22 |
| Down | ENSMUSG00000089990 | -2.31 | 9.57E-05 | Gm15852       | processed_transcript | 6.39 | 6.35 | 6.31 | 6.49 | 4.72 | 4.82 | 2.00 | 4.43 |
| Down | ENSMUSG00000092483 | -1.46 | 1.31E-04 | Gm20421       | processed_transcript | 4.87 | 4.79 | 4.75 | 4.91 | 3.50 | 2.92 | 4.04 | 4.02 |
| Down | ENSMUSG00000085274 | -3.05 | 1.34E-04 | BC046401      | processed_transcript | 3.77 | 4.09 | 3.97 | 3.86 | 2.00 | 2.00 | 2.00 | 3.23 |
| Down | ENSMUSG00000104830 | -2.22 | 1.34E-04 | 5830487J09Rik | processed_transcript | 3.18 | 3.03 | 3.54 | 4.37 | 2.13 | 2.78 | 2.24 | 2.85 |
| Down | ENSMUSG00000092455 | -4.97 | 1.57E-04 | Gm20456       | processed_transcript | 2.16 | 2.16 | 3.36 | 2.38 | 2.00 | 2.00 | 2.00 | 2.00 |
| Down | ENSMUSG00000096907 | -1.69 | 1.69E-04 | Gm10541       | processed_transcript | 4.03 | 3.73 | 4.13 | 4.03 | 3.57 | 3.22 | 2.99 | 3.22 |
| Down | ENSMUSG00000073846 | -5.01 | 1.75E-04 | Gm12526       | processed_transcript | 2.16 | 2.43 | 2.24 | 2.00 | 2.00 | 3.01 | 2.00 | 2.00 |
| Down | ENSMUSG00000071181 | -1.45 | 2.60E-04 | 3830408C21Rik | processed_transcript | 5.24 | 5.12 | 5.31 | 5.40 | 3.89 | 2.92 | 4.67 | 4.23 |
| Down | ENSMUSG00000043993 | -1.88 | 2.64E-04 | 2900052L18Rik | processed_transcript | 3.95 | 3.88 | 3.89 | 4.25 | 2.00 | 3.65 | 2.45 | 2.78 |
| Down | ENSMUSG00000055114 | -2.28 | 2.88E-04 | Anxa13        | processed_transcript | 3.50 | 3.33 | 3.84 | 3.39 | 2.66 | 2.70 | 2.00 | 2.44 |
| Down | ENSMUSG00000087406 | -1.50 | 2.89E-04 | E130215H24Rik | processed_transcript | 4.67 | 4.50 | 4.85 | 4.53 | 2.90 | 2.78 | 4.22 | 3.66 |
| Down | ENSMUSG00000086451 | -1.84 | 3.32E-04 | 4933431K23Rik | processed_transcript | 3.91 | 4.01 | 3.93 | 4.37 | 2.90 | 3.22 | 2.63 | 2.85 |
| Down | ENSMUSG00000073821 | -4.08 | 3.43E-04 | 8030451A03Rik | processed_transcript | 3.02 | 4.01 | 3.80 | 3.08 | 2.00 | 2.34 | 2.00 | 2.24 |
| Down | ENSMUSG00000085982 | -1.95 | 3.90E-04 | 9530051G07Rik | processed_transcript | 3.02 | 4.37 | 4.37 | 4.12 | 2.90 | 2.62 | 2.45 | 3.34 |
| Down | ENSMUSG00000087067 | -3.62 | 4.24E-04 | Gm11532       | processed_transcript | 3.86 | 3.88 | 3.70 | 4.19 | 2.00 | 2.92 | 2.00 | 4.19 |
| Down | ENSMUSG00000104436 | -2.11 | 4.30E-04 | Gm37423       | processed_transcript | 3.38 | 3.88 | 3.43 | 4.37 | 2.37 | 3.43 | 2.00 | 2.44 |
| Down | ENSMUSG00000111334 | -1.71 | 4.67E-04 | Gm30015       | processed_transcript | 3.61 | 3.88 | 3.49 | 3.11 | 2.24 | 2.45 | 2.45 | 3.52 |
| Down | ENSMUSG00000085156 | -1.45 | 4.74E-04 | Snhg15        | processed_transcript | 4.48 | 4.77 | 4.40 | 4.92 | 2.25 | 3.98 | 3.19 | 4.11 |
| Down | ENSMUSG00000110424 | -1.56 | 5.22E-04 | 1700012D14Rik | processed_transcript | 4.29 | 4.50 | 4.91 | 4.55 | 4.07 | 4.07 | 3.13 | 3.66 |
| Down | ENSMUSG00000053442 | -4.76 | 5.36E-04 | 281040811Rik  | processed_transcript | 3.86 | 3.26 | 3.60 | 2.12 | 2.00 | 2.24 | 2.00 | 2.24 |
| Down | ENSMUSG00000109857 | -3.59 | 5.57E-04 | Gm32817       | processed_transcript | 2.00 | 3.11 | 3.11 | 2.13 | 3.08 | 2.00 | 2.00 | 2.24 |
| Down | ENSMUSG00000115729 | -1.39 | 6.43E-04 | Gm48957       | processed_transcript | 4.18 | 4.13 | 4.20 | 4.50 | 2.15 | 3.65 | 3.40 | 3.48 |
| Down | ENSMUSG00000098160 | -3.61 | 7.20E-04 | Gm26974       | processed_transcript | 4.11 | 3.11 | 4.17 | 3.01 | 2.37 | 2.00 | 2.00 | 2.54 |
| Down | ENSMUSG00000087627 | -2.40 | 8.84E-04 | A230005L01Rik | processed_transcript | 3.77 | 3.11 | 2.93 | 2.86 | 2.00 | 2.53 | 2.00 | 2.62 |
| Down | ENSMUSG00000031838 | -1.87 | 9.44E-04 | lf30          | processed_transcript | 4.82 | 4.01 | 3.93 | 4.34 | 2.74 | 3.61 | 2.54 | 3.12 |
| Down | ENSMUSG00000085743 | -3.57 | 1.21E-03 | 8430419K02Rik | processed_transcript | 3.44 | 3.52 | 3.24 | 3.27 | 2.13 | 2.00 | 2.00 | 2.44 |
| Down | ENSMUSG00000092185 | -1.93 | 1.29E-03 | Gm20416       | processed_transcript | 4.29 | 4.69 | 4.17 | 4.05 | 2.37 | 2.00 | 3.63 | 3.48 |
| Down | ENSMUSG00000053749 | -1.25 | 1.29E-03 | Gm9920        | processed_transcript | 4.54 | 4.01 | 4.01 | 4.12 | 3.35 | 2.92 | 3.45 | 3.48 |
| Down | ENSMUSG00000063751 | -2.54 | 1.39E-03 | Platr8        | processed_transcript | 2.85 | 3.52 | 2.93 | 3.69 | 2.00 | 2.70 | 2.00 | 2.44 |
| Down | ENSMUSG00000092220 | -1.95 | 1.50E-03 | Gm20528       | processed_transcript | 4.70 | 4.97 | 4.82 | 5.05 | 3.94 | 2.71 | 2.00 | 2.71 |
| Down | ENSMUSG00000085956 | -2.79 | 1.51E-03 | 4930481B07Rik | processed_transcript | 3.25 | 3.13 | 3.54 | 3.33 | 2.00 | 2.00 | 2.35 | 2.92 |
| Down | ENSMUSG00000097806 | -1.95 | 1.57E-03 | Gm6556        | processed_transcript | 3.72 | 3.92 | 3.80 | 3.98 | 2.47 | 3.11 | 2.00 | 3.12 |
| Down | ENSMUSG00000053442 | -1.12 | 1.81E-03 | 4930697021Rik | processed_transcript | 5.78 | 6.11 | 5.56 | 5.62 | 3.77 | 4.50 | 4.59 | 4.59 |
| Down | ENSMUSG00000096971 | -2.12 | 1.85E-03 | 4930556M19Rik | processed_transcript | 4.39 | 4.58 | 4.70 | 4.67 | 2.00 | 2.85 | 3.54 | 3.53 |
| Down | ENSMUSG00000091587 | -4.52 | 1.87E-03 | Gm17191       | processed_transcript | 2.54 | 2.86 | 2.00 | 2.59 | 2.00 | 2.00 | 2.00 | 2.00 |
| Down | ENSMUSG00000116894 | -1.68 | 1.95E-03 | 4930547E14Rik | processed_transcript | 3.61 | 3.78 | 3.70 | 3.60 | 2.47 | 2.62 | 3.35 | 2.34 |
| Down | ENSMUSG00000085445 | -3.94 | 2.14E-03 | Gm16348       | processed_transcript | 3.38 | 3.63 | 3.89 | 3.55 | 2.00 | 2.34 | 2.00 | 2.34 |
| Down | ENSMUSG00000087675 | -2.11 | 2.49E-03 | Gm11762       | processed_transcript | 3.81 | 3.46 | 3.54 | 3.39 | 2.00 | 2.78 | 2.00 | 3.06 |
| Down | ENSMUSG00000056023 | -2.41 | 2.65E-03 | Gm9989        | processed_transcript | 3.44 | 4.17 | 4.37 | 4.19 | 2.00 | 2.62 | 2.00 | 3.53 |
| Down | ENSMUSG00000086844 | -1.39 | 2.70E-03 | B230206H07Rik | processed_transcript | 4.82 | 4.61 | 4.46 | 5.05 | 3.64 | 3.61 | 3.00 | 4.20 |
| Down | ENSMUSG00000097547 | -1.00 | 2.81E-03 | B230110C06Rik | processed_transcript | 4.62 | 4.50 | 4.70 | 4.82 | 3.77 | 3.84 | 3.07 | 4.48 |
| Down | ENSMUSG00000051844 | -1.52 | 3.04E-03 | B230319C09Rik | processed_transcript | 4.11 | 2.95 | 4.57 | 3.65 | 3.11 | 2.70 | 2.13 | 3.62 |
| Up   | ENSMUSG00000079669 | 1.32  | 3.09E-03 | Gm17396       | processed_transcript | 4.26 | 4.09 | 4.45 | 5.46 | 5.00 | 5.19 | 5.70 | 5.70 |
| Down | ENSMUSG00000104117 | -2.06 | 3.16E-03 | Gm20743       | processed_transcript | 4.07 | 4.50 | 4.13 | 4.13 | 2.13 | 2.24 | 3.19 | 3.66 |
| Down | ENSMUSG00000102224 | -1.53 | 3.22E-03 | 4930447F24Rik | processed_transcript | 2.94 | 3.26 | 3.43 | 3.01 | 2.37 | 2.78 | 2.00 | 2.78 |
| Down | ENSMUSG00000057056 | -1.60 | 3.32E-03 | Gm14314       | processed_transcript | 4.39 | 4.64 | 4.09 | 4.22 | 4.13 | 3.21 | 2.45 | 3.52 |
| Down | ENSMUSG00000091378 | -3.04 | 3.59E-03 | Gm4219        | processed_transcript | 3.38 | 3.63 | 3.60 | 3.60 | 2.90 | 3.60 | 2.00 | 2.12 |
| Down | ENSMUSG00000085415 | -3.52 | 3.60E-03 | Selenok-ps1   | processed_transcript | 2.30 | 2.00 | 3.23 | 2.00 | 2.00 | 2.34 | 2.00 | 2.00 |
| Down | ENSMUSG00000087556 | -1.65 | 4.36E-03 | Gm15764       | processed_transcript | 3.18 | 4.13 | 3.60 | 3.65 | 2.13 | 3.61 | 2.00 | 2.70 |
| Down | ENSMUSG00000105195 | -4.58 | 4.51E-03 | Gm43584       | processed_transcript | 2.54 | 2.55 | 3.01 | 2.77 | 2.00 | 2.00 | 2.00 | 2.24 |
| Down | ENSMUSG00000085184 | -1.97 | 4.68E-03 | 4933439K11Rik | processed_transcript | 4.51 | 3.33 | 4.17 | 4.42 | 2.00 | 3.87 | 2.45 | 2.62 |
| Down | ENSMUSG00000085710 | -3.27 | 4.71E-03 | Gm12676       | processed_transcript | 3.10 | 2.86 | 3.23 | 2.27 | 2.00 | 2.24 | 2.00 | 2.24 |
| Down | ENSMUSG00000084938 | -4.27 | 5.36E-03 | BB557941      | processed_transcript | 2.30 | 3.19 | 2.93 | 3.08 | 2.00 | 2.00 | 2.00 | 2.24 |
| Down | ENSMUSG00000092353 | -3.16 | 5.49E-03 | Gm20539       | processed_transcript | 3.77 | 2.66 | 3.36 | 3.08 | 2.00 | 2.12 | 2.00 | 2.62 |
| Down | ENSMUSG00000106407 | -2.98 | 5.93E-03 | Gm43439       | processed_transcript | 3.86 | 3.57 | 3.89 | 3.55 | 2.00 | 2.85 | 2.00 | 2.44 |
| Down | ENSMUSG00000108446 | -1.67 | 5.96E-03 | Gm44997       | processed_transcript | 3.38 | 3.26 | 3.36 | 3.04 | 2.92 | 2.71 | 2.45 | 2.71 |
| Down | ENSMUSG00000087295 | -2.12 | 6.41E-03 | Gm3948        | processed_transcript | 2.54 | 2.55 | 2.93 | 3.21 | 2.00 | 2.63 | 2.00 | 2.24 |
| Down | ENSMUSG00000099930 | -2.43 | 6.56E-03 | Gm2396        | processed_transcript | 3.38 | 3.63 | 4.01 | 3.86 | 2.57 |      |      |      |

|      |                     |       |           |               |                      |       |       |       |       |       |       |       |       |
|------|---------------------|-------|-----------|---------------|----------------------|-------|-------|-------|-------|-------|-------|-------|-------|
| Down | ENSMUSG00000084866  | -1.67 | 9.26E-03  | A930006K02Rik | processed_transcript | 3.25  | 3.63  | 3.65  | 3.08  | 2.66  | 2.62  | 2.13  | 2.92  |
| Down | ENSMUSG00000087553  | -4.04 | 9.88E-03  | 5730412P04Rik | processed_transcript | 2.75  | 2.66  | 3.80  | 3.74  | 2.25  | 2.00  | 2.00  | 2.24  |
| Up   | ENSMUSG00000031955  | 4.24  | 0.00E+00  | Bcar1         | protein_coding       | 8.18  | 8.15  | 8.40  | 8.20  | 12.42 | 12.39 | 12.50 | 12.50 |
| Up   | ENSMUSG00000037771  | 3.94  | 0.00E+00  | Slc32a1       | protein_coding       | 7.87  | 7.83  | 7.82  | 7.84  | 11.81 | 11.71 | 11.88 | 11.60 |
| Up   | ENSMUSG00000026890  | 3.86  | 0.00E+00  | Lhx6          | protein_coding       | 7.19  | 7.06  | 7.00  | 7.19  | 10.96 | 11.03 | 10.90 | 10.83 |
| Up   | ENSMUSG00000049659  | 3.80  | 0.00E+00  | Atp9h         | protein_coding       | 9.38  | 9.34  | 9.39  | 9.34  | 13.03 | 13.17 | 13.22 | 13.18 |
| Up   | ENSMUSG00000022289  | 3.26  | 0.00E+00  | Egr3b4        | protein_coding       | 9.22  | 9.20  | 9.30  | 9.26  | 12.52 | 12.52 | 12.52 | 12.57 |
| Up   | ENSMUSG00000030310  | 2.93  | 0.00E+00  | Slc6a1        | protein_coding       | 10.04 | 10.05 | 10.07 | 10.01 | 12.88 | 13.03 | 13.06 | 12.87 |
| Up   | ENSMUSG00000035681  | 2.82  | 0.00E+00  | Kcnc2         | protein_coding       | 9.43  | 9.34  | 9.35  | 9.28  | 12.11 | 12.26 | 12.17 | 12.10 |
| Down | ENSMUSG00000064370  | -5.96 | 0.00E+00  | mt-Cytb       | protein_coding       | 14.69 | 14.80 | 14.96 | 15.13 | 9.03  | 9.03  | 8.59  | 9.12  |
| Down | ENSMUSG00000064341  | -5.26 | 0.00E+00  | mt-Nd1        | protein_coding       | 14.44 | 14.52 | 14.70 | 14.71 | 9.53  | 9.26  | 9.07  | 9.48  |
| Down | ENSMUSG00000053310  | -4.66 | 0.00E+00  | Nrgn          | protein_coding       | 13.08 | 13.05 | 13.14 | 13.02 | 8.50  | 8.43  | 8.24  | 8.52  |
| Down | ENSMUSG00000070570  | -4.41 | 0.00E+00  | Slc17a7       | protein_coding       | 12.64 | 12.58 | 12.73 | 12.50 | 7.97  | 8.56  | 8.19  | 8.11  |
| Down | ENSMUSG00000030905  | -4.06 | 0.00E+00  | Crym          | protein_coding       | 9.30  | 9.33  | 9.34  | 9.37  | 5.49  | 5.33  | 5.27  | 5.55  |
| Down | ENSMUSG00000047907  | -4.01 | 0.00E+00  | Tshz2         | protein_coding       | 11.01 | 11.09 | 11.01 | 10.91 | 7.24  | 6.94  | 6.82  | 7.12  |
| Down | ENSMUSG00000053025  | -3.86 | 0.00E+00  | Sv2b          | protein_coding       | 11.43 | 11.46 | 11.17 | 11.33 | 7.82  | 7.53  | 7.21  | 7.47  |
| Down | ENSMUSG00000049630  | -3.67 | 0.00E+00  | C1q3          | protein_coding       | 9.73  | 9.70  | 9.63  | 9.56  | 6.29  | 5.81  | 5.93  | 6.21  |
| Down | ENSMUSG00000025582  | -3.41 | 0.00E+00  | Nptx1         | protein_coding       | 11.29 | 11.21 | 11.21 | 11.00 | 7.59  | 7.78  | 7.96  | 7.73  |
| Down | ENSMUSG00000003948  | -2.82 | 0.00E+00  | Mmd           | protein_coding       | 11.12 | 11.01 | 11.19 | 11.10 | 8.37  | 8.12  | 8.34  | 8.37  |
| Down | ENSMUSG00000049556  | -2.56 | 0.00E+00  | Lingo1        | protein_coding       | 10.49 | 10.52 | 10.56 | 10.44 | 8.10  | 7.91  | 7.95  | 7.89  |
| Down | ENSMUSG00000032503  | -2.32 | 0.00E+00  | Atp2t1        | protein_coding       | 10.52 | 10.69 | 10.54 | 10.68 | 8.10  | 8.41  | 8.32  | 8.34  |
| Down | ENSMUSG00000050589  | -3.08 | 9.59E-289 | Slc12a2       | protein_coding       | 14.15 | 14.21 | 14.16 | 14.06 | 10.99 | 11.13 | 10.89 | 11.23 |
| Up   | ENSMUSG00000053141  | 1.93  | 1.66E-286 | Ptprt         | protein_coding       | 9.95  | 9.99  | 10.02 | 10.07 | 11.90 | 11.90 | 12.03 | 11.92 |
| Down | ENSMUSG00000039114  | -3.70 | 8.22E-284 | Nm1           | protein_coding       | 10.80 | 10.70 | 10.87 | 10.78 | 7.37  | 6.94  | 7.02  | 7.16  |
| Down | ENSMUSG00000038255  | -3.92 | 9.92E-284 | Neurod2       | protein_coding       | 10.04 | 9.79  | 10.22 | 9.83  | 5.95  | 6.22  | 6.35  | 6.01  |
| Down | ENSMUSG00000064351  | -5.72 | 6.89E-279 | mt-Co1        | protein_coding       | 14.78 | 14.84 | 15.04 | 15.08 | 9.36  | 9.02  | 9.28  | 9.22  |
| Up   | ENSMUSG00000000552  | 2.61  | 3.07E-274 | Zfp385a       | protein_coding       | 8.34  | 8.22  | 8.24  | 8.18  | 10.88 | 10.94 | 10.86 | 10.64 |
| Down | ENSMUSG00000078591  | -3.40 | 8.35E-272 | Hs3st4        | protein_coding       | 9.81  | 9.67  | 9.91  | 9.58  | 6.29  | 6.40  | 6.58  | 6.36  |
| Up   | ENSMUSG00000030268  | 2.01  | 1.56E-251 | Bcat1         | protein_coding       | 9.15  | 9.13  | 8.92  | 9.04  | 11.06 | 11.05 | 11.07 | 11.06 |
| Up   | ENSMUSG00000020042  | 3.60  | 3.79E-249 | Btbd11        | protein_coding       | 7.18  | 7.18  | 7.14  | 6.79  | 10.69 | 10.76 | 10.66 | 10.45 |
| Up   | ENSMUSG00000046178  | 3.47  | 4.10E-237 | Nxph1         | protein_coding       | 7.43  | 7.55  | 7.25  | 7.59  | 10.86 | 11.00 | 10.90 | 10.84 |
| Down | ENSMUSG000000050505 | -3.50 | 1.21E-234 | Pcdh20        | protein_coding       | 9.93  | 9.83  | 9.83  | 9.48  | 6.25  | 6.22  | 6.27  | 6.60  |
| Down | ENSMUSG00000035456  | -3.47 | 5.87E-234 | Frdm8         | protein_coding       | 8.52  | 8.57  | 8.48  | 8.56  | 4.92  | 5.20  | 5.32  | 5.32  |
| Down | ENSMUSG00000028765  | -3.22 | 6.19E-234 | Hpsa          | protein_coding       | 12.53 | 12.30 | 12.65 | 12.23 | 9.24  | 9.20  | 9.25  | 9.25  |
| Down | ENSMUSG00000045034  | 2.82  | 3.35E-232 | Ankrd34b      | protein_coding       | 7.65  | 7.58  | 7.39  | 7.61  | 10.30 | 10.45 | 10.36 | 10.32 |
| Up   | ENSMUSG00000027347  | -2.07 | 1.84E-231 | Nsgrp1        | protein_coding       | 11.83 | 11.79 | 11.86 | 11.79 | 9.69  | 9.77  | 9.69  | 9.74  |
| Down | ENSMUSG00000030772  | -3.58 | 8.89E-230 | Dkk3          | protein_coding       | 10.74 | 10.53 | 10.62 | 10.43 | 7.04  | 6.85  | 7.17  | 7.11  |
| Down | ENSMUSG00000048644  | -4.09 | 2.84E-228 | Cxcr1         | protein_coding       | 10.66 | 10.67 | 10.66 | 10.76 | 6.26  | 6.88  | 6.73  | 6.63  |
| Up   | ENSMUSG00000026452  | 4.02  | 9.72E-228 | Syt2          | protein_coding       | 7.84  | 7.59  | 7.50  | 7.32  | 11.68 | 11.63 | 11.70 | 11.18 |
| Up   | ENSMUSG00000018470  | 3.17  | 3.29E-222 | Kcnab3        | protein_coding       | 7.28  | 7.09  | 7.22  | 6.87  | 10.35 | 10.27 | 10.31 | 10.06 |
| Up   | ENSMUSG00000039601  | 2.39  | 5.33E-222 | Rcan2         | protein_coding       | 10.17 | 10.18 | 10.01 | 9.92  | 12.52 | 12.39 | 12.60 | 12.33 |
| Up   | ENSMUSG00000025892  | 2.38  | 1.60E-221 | Gria4         | protein_coding       | 8.84  | 9.15  | 8.69  | 8.96  | 11.24 | 11.37 | 11.32 | 11.23 |
| Up   | ENSMUSG00000057880  | 2.25  | 2.18E-221 | Abat          | protein_coding       | 9.98  | 9.95  | 9.73  | 9.86  | 12.13 | 12.20 | 12.18 | 12.00 |
| Up   | ENSMUSG00000043456  | 2.18  | 4.20E-220 | Zfp536        | protein_coding       | 8.53  | 8.43  | 8.43  | 8.47  | 10.74 | 10.58 | 10.68 | 10.51 |
| Down | ENSMUSG00000025128  | -4.21 | 9.85E-219 | Bhlhe22       | protein_coding       | 9.37  | 9.18  | 9.29  | 9.35  | 5.49  | 4.96  | 5.40  | 5.06  |
| Down | ENSMUSG00000009075  | -3.08 | 1.41E-218 | Cabp7         | protein_coding       | 10.71 | 10.43 | 10.66 | 10.25 | 7.51  | 7.51  | 7.52  | 7.36  |
| Down | ENSMUSG00000025867  | -1.77 | 8.23E-218 | Capi2         | protein_coding       | 13.07 | 13.07 | 13.17 | 11.43 | 11.31 | 11.43 | 11.41 | 11.41 |
| Down | ENSMUSG00000064363  | -6.09 | 1.10E-217 | mt-Nd4        | protein_coding       | 13.79 | 13.95 | 14.01 | 14.25 | 7.40  | 7.71  | 8.30  | 8.30  |
| Down | ENSMUSG00000022454  | -2.79 | 1.32E-216 | Nell2         | protein_coding       | 11.85 | 11.74 | 11.90 | 11.63 | 9.06  | 9.17  | 8.88  | 8.85  |
| Down | ENSMUSG00000071470  | -5.18 | 2.14E-215 | Ccnb1ip1      | protein_coding       | 14.03 | 13.89 | 13.67 | 13.82 | 8.65  | 8.80  | 8.75  | 8.55  |
| Down | ENSMUSG00000021420  | -2.66 | 6.86E-213 | Fars2         | protein_coding       | 9.88  | 9.79  | 9.93  | 9.88  | 7.40  | 7.93  | 7.22  | 7.22  |
| Up   | ENSMUSG00000048834  | 2.38  | 6.80E-211 | Vstm2a        | protein_coding       | 9.49  | 9.50  | 9.40  | 9.62  | 11.82 | 11.89 | 11.94 | 11.84 |
| Down | ENSMUSG00000025658  | -1.55 | 1.26E-207 | Cnksr2        | protein_coding       | 11.67 | 11.77 | 11.65 | 11.65 | 10.03 | 10.13 | 10.23 | 10.22 |
| Up   | ENSMUSG00000020810  | 2.62  | 2.59E-205 | Cygb          | protein_coding       | 8.31  | 8.34  | 8.21  | 8.28  | 10.98 | 10.92 | 10.89 | 10.79 |
| Up   | ENSMUSG00000026787  | 3.10  | 3.13E-203 | Gad2          | protein_coding       | 9.82  | 9.79  | 9.54  | 9.78  | 12.73 | 12.88 | 13.00 | 12.60 |
| Up   | ENSMUSG00000032020  | 2.76  | 1.18E-202 | Ubash3b       | protein_coding       | 7.89  | 7.72  | 7.86  | 7.82  | 10.67 | 10.52 | 10.72 | 10.43 |
| Down | ENSMUSG00000021743  | -4.33 | 9.98E-202 | Fezf2         | protein_coding       | 8.28  | 8.31  | 8.06  | 8.16  | 4.19  | 3.91  | 4.19  | 4.48  |
| Down | ENSMUSG00000063659  | -2.77 | 3.36E-201 | Zbtb18        | protein_coding       | 12.04 | 11.95 | 12.04 | 11.85 | 9.46  | 9.11  | 9.28  | 8.94  |
| Up   | ENSMUSG00000031543  | 3.25  | 3.12E-199 | Ank1          | protein_coding       | 8.70  | 8.83  | 8.68  | 8.55  | 12.05 | 11.88 | 12.11 | 11.63 |
| Down | ENSMUSG00000032355  | -2.79 | 7.54E-196 | Milp          | protein_coding       | 9.83  | 9.87  | 9.87  | 9.90  | 7.17  | 7.30  | 6.90  | 7.05  |
| Up   | ENSMUSG00000026610  | 2.60  | 5.20E-194 | Esrng         | protein_coding       | 7.37  | 7.32  | 7.47  | 7.64  | 9.90  | 10.14 | 10.02 | 10.02 |
| Down | ENSMUSG00000094910  | -1.90 | 2.80E-192 | D430019H16Rik | protein_coding       | 10.40 | 10.30 | 10.35 | 10.40 | 8.49  | 8.52  | 8.33  | 8.56  |
| Down | ENSMUSG00000059213  | -2.86 | 8.93E-189 | Ddn           | protein_coding       | 13.90 | 13.76 | 13.82 | 13.56 | 10.93 | 11.00 | 10.86 | 10.83 |
| Down | ENSMUSG00000022708  | -2.06 | 4.17E-188 | Zbtb20        | protein_coding       | 11.94 | 11.95 | 12.08 | 11.86 | 9.72  | 9.72  | 9.96  | 9.93  |
| Down | ENSMUSG00000035033  | -3.81 | 6.49E-186 | Tbr1          | protein_coding       | 8.46  | 8.60  | 8.27  | 8.47  | 4.70  | 5.00  | 4.38  | 5.15  |
| Down | ENSMUSG00000046329  | -1.78 | 7.68E-182 | Slc25a23      | protein_coding       | 12.17 | 12.13 | 12.24 | 12.12 | 10.43 | 10.40 | 10.39 | 10.32 |
| Down | ENSMUSG00000039533  | -2.67 | 3.28E-181 | Mmd2          | protein_coding       | 9.55  | 9.56  | 9.59  | 9.56  | 6.84  | 7.04  | 6.65  | 7.16  |
| Up   | ENSMUSG00000020814  | 3.01  | 9.51E-181 | Mxra7         | protein_coding       | 6.99  | 6.71  | 6.86  | 6.83  | 9.84  | 9.89  | 9.88  | 9.63  |
| Up   | ENSMUSG00000038617  | 2.18  | 2.43E-180 | Etl4          | protein_coding       | 9.96  | 10.14 | 10.12 | 10.00 | 12.18 | 12.25 | 12.28 | 12.22 |
| Down | ENSMUSG00000053963  | -3.61 | 4.79E-180 | Stum          | protein_coding       | 12.22 | 12.07 | 12.10 | 11.88 | 8.40  | 8.68  | 7.91  | 8.77  |
| Down | ENSMUSG00000057522  | -1.93 | 2.71E-179 | Spop          | protein_coding       | 10.97 | 10.91 | 10.84 | 10.85 | 9.09  | 8.84  | 8.87  | 9.07  |
| Up   | ENSMUSG00000029516  | 2.36  | 8.60E-178 | Ct            | protein_coding       | 9.75  | 9.71  | 9.62  | 9.58  | 12.12 | 12.06 | 12.04 | 11.86 |
| Down | ENSMUSG00000055430  | -2.08 | 9.44E-176 | Nap1i5        | protein_coding       | 10.83 | 10.89 | 10.83 | 11.02 | 12.96 | 13.04 | 12.97 | 13.01 |
| Down | ENSMUSG00000056578  | -2.99 | 3.95E-177 | Gabra5        | protein_coding       | 10.31 | 10.29 | 10.40 | 10.16 | 7.52  | 7.25  | 7.41  | 7.13  |
| Up   | ENSMUSG00000038602  | 1.55  | 2.63E-176 | Neto2         | protein_coding       | 9.12  | 9.06  | 8.93  | 9.09  | 10.68 | 10.58 | 10.58 | 10.55 |
| Up   | ENSMUSG00000058975  | 2.57  | 2.72E-174 | Kcnc1         | protein_coding       | 10.23 | 10.13 | 10.19 | 10.05 | 12.76 | 12.73 | 12.83 | 12.52 |
| Up   | ENSMUSG00000039485  | 1.60  | 1.60E-171 | Tsply4        | protein_coding       | 11.02 | 10.90 | 10.88 | 10.88 | 12.48 | 12.61 | 12.55 | 12.44 |
| Up   | ENSMUSG00000021194  | 2.44  | 8.32E-171 | Chga          | protein_coding       | 9.30  | 9.39  | 9.20  | 9.12  | 11.74 | 11.62 | 11.86 | 11.51 |
| Up   | ENSMUSG00000050043  | 1.32  | 2.27E-169 | Tmx2          | protein_coding       | 9.18  | 9.13  | 9.09  | 9.10  | 10.45 | 10.46 | 10.45 | 10.40 |
| Down | ENSMUSG00000022283  | -1.87 | 7.81E-169 | Pabpc1        | protein_coding       | 11.07 | 10.92 | 10.95 | 10.93 | 9.22  | 9.04  | 9.09  | 9.09  |
| Up   | ENSMUSG00000026335  | 1.84  | 5.91E-168 | Pam           | protein_coding       | 10.28 | 10.24 | 10.36 | 10.21 | 12.06 | 12.05 | 12.09 | 12.01 |
| Down | ENSMUSG00000027296  | -3.34 | 1.05E-163 | Itpka         | protein_coding       | 9.80  | 9.56  | 9.79  | 9.50  | 6.49  | 6.50  | 5.95  | 6.53  |
| Down | ENSMUSG00000030103  | -2.50 | 1.79E-163 | Bhlhe40       | protein_coding       | 9.44  | 9.34  | 9.34  | 9.41  | 6.79  | 7.02  | 6.81  | 7.09  |
| Down | ENSMUSG00000035781  | -1.52 | 4.14E-163 | R3hdm4        | protein_coding       | 10.71 | 10.66 | 10.66 | 10.55 | 9.06  | 9.16  | 9.12  | 9.22  |
| Up   | ENSMUSG00000074607  | 2.38  | 1.30E-162 | Tox2          | protein_coding       | 7.76  | 7.70  | 7.55  | 7     |       |       |       |       |

|      |                     |       |           |               |                |       |       |       |       |       |       |       |       |
|------|---------------------|-------|-----------|---------------|----------------|-------|-------|-------|-------|-------|-------|-------|-------|
| Up   | ENSMUSG00000038068  | 2.61  | 1.70E-156 | Rnf144b       | protein_coding | 6.66  | 6.67  | 6.52  | 6.74  | 9.07  | 9.32  | 9.26  | 9.19  |
| Down | ENSMUSG00000022382  | -3.86 | 3.54E-156 | Wnt7b         | protein_coding | 8.00  | 8.06  | 8.04  | 8.02  | 4.39  | 4.22  | 4.73  | 4.36  |
| Down | ENSMUSG00000043811  | -3.21 | 5.82E-156 | Rtn4r         | protein_coding | 8.89  | 8.77  | 8.51  | 8.51  | 5.99  | 5.24  | 5.63  | 5.61  |
| Up   | ENSMUSG000000043670 | 2.20  | 3.33E-155 | Diras1        | protein_coding | 9.15  | 9.15  | 9.08  | 9.05  | 11.28 | 11.33 | 11.42 | 11.14 |
| Down | ENSMUSG000000041773 | -2.25 | 5.88E-155 | Enc1          | protein_coding | 11.72 | 11.67 | 11.58 | 11.49 | 9.34  | 9.62  | 9.19  | 9.30  |
| Down | ENSMUSG000000035513 | -3.07 | 6.34E-155 | Nlmg2         | protein_coding | 8.70  | 8.60  | 8.87  | 8.72  | 5.93  | 5.61  | 5.41  | 5.98  |
| Down | ENSMUSG000000034365 | -2.87 | 9.11E-155 | mt-Nd6        | protein_coding | 14.21 | 14.39 | 14.39 | 14.66 | 9.73  | 9.64  | 9.73  | 9.91  |
| Up   | ENSMUSG000000074622 | 3.34  | 1.90E-153 | Mafb          | protein_coding | 6.89  | 6.59  | 6.43  | 6.76  | 9.99  | 9.86  | 10.15 | 9.85  |
| Down | ENSMUSG000000026235 | -1.51 | 3.15E-153 | Epha4         | protein_coding | 10.68 | 10.60 | 10.71 | 10.55 | 9.11  | 9.18  | 9.17  | 9.08  |
| Up   | ENSMUSG000000026932 | 1.99  | 4.18E-153 | Nacc2         | protein_coding | 9.26  | 9.27  | 9.16  | 9.24  | 11.13 | 11.22 | 11.36 | 11.11 |
| Down | ENSMUSG000000022421 | -1.95 | 1.09E-152 | Nptxr         | protein_coding | 12.13 | 12.02 | 12.23 | 12.11 | 10.15 | 10.18 | 10.24 | 10.14 |
| Up   | ENSMUSG000000064329 | 2.08  | 1.41E-152 | Scn1a         | protein_coding | 9.64  | 9.51  | 9.70  | 9.44  | 11.62 | 11.61 | 11.79 | 11.57 |
| Up   | ENSMUSG000000054423 | 1.82  | 2.73E-151 | Cadps         | protein_coding | 10.51 | 10.52 | 10.51 | 10.39 | 12.35 | 12.29 | 12.44 | 12.08 |
| Down | ENSMUSG000000025372 | -2.50 | 4.83E-151 | Baiap2        | protein_coding | 9.95  | 9.79  | 9.80  | 9.70  | 7.54  | 7.17  | 7.04  | 7.55  |
| Up   | ENSMUSG000000031841 | 2.36  | 1.26E-150 | Cdh13         | protein_coding | 7.95  | 7.83  | 7.88  | 8.14  | 10.23 | 10.49 | 10.26 | 10.20 |
| Up   | ENSMUSG000000038319 | 2.98  | 1.50E-150 | Kcnh2         | protein_coding | 6.92  | 6.89  | 6.96  | 7.12  | 9.98  | 9.86  | 10.05 | 9.76  |
| Up   | ENSMUSG000000029769 | 2.21  | 1.59E-150 | Ccdc136       | protein_coding | 9.13  | 9.16  | 9.17  | 9.06  | 11.41 | 11.18 | 11.51 | 11.23 |
| Up   | ENSMUSG000000038486 | 2.04  | 2.67E-150 | Sv2a          | protein_coding | 10.62 | 10.52 | 10.55 | 10.35 | 12.56 | 12.47 | 12.74 | 12.40 |
| Up   | ENSMUSG000000035891 | 2.26  | 1.29E-149 | Cerk          | protein_coding | 8.66  | 8.74  | 8.65  | 8.50  | 10.92 | 10.94 | 11.00 | 10.67 |
| Down | ENSMUSG000000040606 | -1.68 | 7.62E-148 | Kazn          | protein_coding | 8.86  | 8.87  | 8.87  | 8.74  | 10.49 | 10.59 | 10.54 | 10.38 |
| Down | ENSMUSG000000028266 | -2.32 | 2.25E-147 | Lmo4          | protein_coding | 9.59  | 9.73  | 9.73  | 9.78  | 7.30  | 7.47  | 7.47  | 7.62  |
| Down | ENSMUSG000000078816 | -1.82 | 2.75E-146 | Pknox         | protein_coding | 11.14 | 11.05 | 11.25 | 11.12 | 9.25  | 9.35  | 9.35  | 9.38  |
| Up   | ENSMUSG000000055435 | 2.55  | 2.76E-146 | Maf           | protein_coding | 7.54  | 7.37  | 7.44  | 7.64  | 10.20 | 10.09 | 9.95  | 9.82  |
| Up   | ENSMUSG000000035936 | 1.86  | 6.57E-146 | Aldh5a1       | protein_coding | 8.94  | 8.90  | 8.70  | 8.84  | 10.65 | 10.84 | 10.74 | 10.54 |
| Up   | ENSMUSG000000032890 | 1.76  | 1.67E-145 | Rims3         | protein_coding | 9.01  | 8.95  | 8.86  | 8.86  | 10.62 | 10.67 | 10.75 | 10.63 |
| Up   | ENSMUSG000000034312 | 1.85  | 6.15E-144 | Iqsec1        | protein_coding | 11.07 | 11.05 | 11.04 | 10.89 | 12.91 | 12.84 | 13.02 | 12.66 |
| Down | ENSMUSG000000028161 | -1.65 | 7.50E-144 | Ppp3ca        | protein_coding | 12.81 | 12.82 | 12.87 | 12.73 | 11.05 | 11.24 | 11.15 | 11.22 |
| Down | ENSMUSG000000036766 | -2.61 | 2.31E-143 | Dner          | protein_coding | 8.72  | 8.65  | 8.62  | 8.82  | 11.21 | 11.36 | 11.45 | 11.16 |
| Down | ENSMUSG000000079056 | -2.72 | 2.11E-140 | Kcnip3        | protein_coding | 9.10  | 9.10  | 9.02  | 8.97  | 6.55  | 6.30  | 5.97  | 6.64  |
| Up   | ENSMUSG000000027834 | 2.35  | 2.07E-139 | Serpini1      | protein_coding | 9.79  | 9.96  | 9.68  | 9.97  | 12.16 | 12.26 | 12.29 | 12.07 |
| Down | ENSMUSG000000043969 | -4.29 | 8.48E-139 | Emx2          | protein_coding | 8.27  | 8.17  | 8.17  | 7.88  | 4.16  | 3.38  | 4.54  | 4.28  |
| Down | ENSMUSG000000046807 | -3.09 | 1.45E-138 | Hrk           | protein_coding | 8.60  | 8.54  | 8.59  | 8.64  | 5.06  | 5.81  | 5.81  | 5.63  |
| Down | ENSMUSG000000039443 | -1.52 | 1.72E-138 | Ap2b1         | protein_coding | 12.13 | 12.03 | 12.14 | 11.94 | 10.52 | 10.67 | 10.50 | 10.38 |
| Up   | ENSMUSG000000029674 | 2.35  | 4.65E-138 | Lmx1          | protein_coding | 8.59  | 8.68  | 8.52  | 8.51  | 10.76 | 10.72 | 10.72 | 10.42 |
| Up   | ENSMUSG000000017493 | 2.43  | 4.75E-138 | Igf2p4        | protein_coding | 8.92  | 8.53  | 8.91  | 8.69  | 11.36 | 11.17 | 11.07 | 11.15 |
| Up   | ENSMUSG000000015709 | 1.33  | 6.89E-136 | Arnt2         | protein_coding | 10.28 | 10.22 | 10.37 | 10.23 | 11.55 | 11.59 | 11.72 | 11.54 |
| Up   | ENSMUSG000000050511 | 3.11  | 8.75E-136 | Oprd1         | protein_coding | 6.51  | 5.99  | 6.27  | 6.24  | 9.26  | 9.43  | 9.40  | 9.13  |
| Down | ENSMUSG000000026701 | -1.74 | 3.82E-134 | Prdx6         | protein_coding | 9.49  | 9.53  | 9.47  | 9.49  | 7.81  | 7.69  | 7.72  | 7.87  |
| Up   | ENSMUSG000000025190 | 1.87  | 4.65E-134 | Got1          | protein_coding | 9.83  | 9.80  | 9.73  | 9.76  | 11.67 | 11.72 | 11.77 | 11.39 |
| Up   | ENSMUSG000000010803 | 2.04  | 7.82E-134 | Gabra1        | protein_coding | 10.85 | 10.93 | 10.84 | 10.83 | 12.93 | 12.86 | 13.06 | 12.73 |
| Up   | ENSMUSG000000036564 | 1.80  | 8.57E-133 | Ndr4g         | protein_coding | 11.92 | 11.94 | 11.85 | 11.84 | 13.70 | 13.76 | 13.81 | 13.55 |
| Down | ENSMUSG000000000247 | -3.31 | 1.32E-132 | Lhx2          | protein_coding | 8.99  | 8.86  | 8.74  | 8.63  | 5.71  | 5.66  | 5.62  | 5.62  |
| Up   | ENSMUSG000000022537 | 1.75  | 2.71E-132 | Tmem44        | protein_coding | 8.43  | 8.45  | 8.47  | 8.34  | 10.29 | 10.11 | 10.14 | 10.09 |
| Up   | ENSMUSG000000035277 | 3.32  | 1.21E-131 | Arx           | protein_coding | 7.12  | 6.79  | 6.75  | 6.89  | 10.33 | 10.15 | 10.11 | 10.08 |
| Up   | ENSMUSG000000002771 | 2.41  | 1.38E-131 | Grin2d        | protein_coding | 7.38  | 7.13  | 7.14  | 7.03  | 9.38  | 9.72  | 9.53  | 9.40  |
| Down | ENSMUSG000000067879 | -2.99 | 1.86E-131 | Vxn           | protein_coding | 10.91 | 10.92 | 10.76 | 10.76 | 8.24  | 7.43  | 7.80  | 7.84  |
| Up   | ENSMUSG000000033278 | 2.85  | 3.27E-131 | Piprm         | protein_coding | 8.93  | 8.96  | 7.46  | 7.29  | 10.01 | 9.97  | 10.07 | 9.77  |
| Down | ENSMUSG000000030376 | -2.37 | 8.86E-131 | Slc8a2        | protein_coding | 10.27 | 10.01 | 10.22 | 10.04 | 7.46  | 7.57  | 7.76  | 8.16  |
| Up   | ENSMUSG000000026393 | 2.36  | 5.21E-130 | Nek7          | protein_coding | 8.36  | 8.37  | 8.46  | 8.50  | 10.73 | 10.71 | 11.06 | 10.67 |
| Up   | ENSMUSG000000021613 | 2.81  | 9.44E-130 | Hapln1        | protein_coding | 7.43  | 7.44  | 7.62  | 7.81  | 10.16 | 10.46 | 10.45 | 10.40 |
| Up   | ENSMUSG000000029094 | 1.94  | 2.49E-129 | Afap1         | protein_coding | 7.71  | 7.62  | 7.64  | 7.49  | 9.65  | 9.61  | 9.44  | 9.41  |
| Up   | ENSMUSG000000026000 | 1.61  | 3.46E-127 | Lanc1l        | protein_coding | 9.21  | 9.38  | 9.48  | 9.39  | 10.89 | 11.09 | 10.99 | 10.91 |
| Up   | ENSMUSG000000066392 | 1.36  | 1.82E-126 | Nrxn3         | protein_coding | 10.18 | 10.01 | 10.21 | 10.10 | 11.51 | 11.56 | 11.46 | 11.41 |
| Down | ENSMUSG000000046447 | -2.06 | 2.41E-126 | Camk2n1       | protein_coding | 12.57 | 12.56 | 12.40 | 12.40 | 10.52 | 10.56 | 10.41 | 10.22 |
| Up   | ENSMUSG000000039252 | 2.30  | 3.45E-126 | Lgi2          | protein_coding | 8.91  | 9.04  | 9.09  | 8.84  | 11.16 | 11.21 | 11.58 | 11.06 |
| Down | ENSMUSG000000009216 | -2.25 | 1.12E-125 | Fam163b       | protein_coding | 10.35 | 10.33 | 10.68 | 10.39 | 7.90  | 8.39  | 8.28  | 8.25  |
| Down | ENSMUSG000000026730 | -3.60 | 1.38E-125 | Pter          | protein_coding | 8.78  | 8.71  | 8.64  | 8.95  | 5.65  | 5.08  | 5.26  | 5.20  |
| Up   | ENSMUSG000000031996 | 1.53  | 1.52E-124 | Aplp2         | protein_coding | 10.91 | 10.83 | 10.85 | 10.71 | 12.45 | 12.30 | 12.41 | 12.23 |
| Down | ENSMUSG000000034701 | -4.14 | 1.52E-124 | Neurod1       | protein_coding | 7.51  | 7.56  | 7.78  | 7.47  | 3.89  | 4.07  | 3.50  | 3.99  |
| Up   | ENSMUSG000000048998 | 2.75  | 2.03E-124 | Eifm1         | protein_coding | 8.08  | 7.79  | 7.71  | 7.85  | 10.73 | 10.50 | 10.63 | 10.46 |
| Up   | ENSMUSG000000031772 | 2.65  | 5.82E-124 | Cntnap4       | protein_coding | 7.41  | 7.61  | 7.37  | 7.57  | 10.17 | 9.96  | 10.29 | 10.01 |
| Up   | ENSMUSG000000020396 | 2.80  | 5.24E-123 | Nefh          | protein_coding | 8.92  | 8.86  | 8.98  | 8.69  | 11.87 | 11.62 | 11.76 | 11.32 |
| Up   | ENSMUSG000000049866 | 2.25  | 1.05E-122 | Arl4c         | protein_coding | 8.40  | 8.44  | 8.37  | 8.37  | 10.49 | 10.73 | 10.71 | 10.58 |
| Up   | ENSMUSG000000021680 | 3.91  | 1.14E-122 | Crhbp         | protein_coding | 6.45  | 6.03  | 6.46  | 6.21  | 10.31 | 9.76  | 10.54 | 9.80  |
| Down | ENSMUSG000000005360 | -2.79 | 1.54E-122 | Slc1a3        | protein_coding | 10.61 | 10.67 | 10.64 | 10.71 | 7.65  | 8.18  | 7.48  | 8.13  |
| Up   | ENSMUSG000000047495 | 1.12  | 2.29E-122 | Dlgap2        | protein_coding | 9.47  | 9.45  | 9.50  | 9.42  | 10.62 | 10.58 | 10.57 | 10.52 |
| Down | ENSMUSG000000027660 | -1.66 | 4.02E-121 | Skil          | protein_coding | 9.80  | 9.68  | 9.79  | 9.77  | 8.01  | 8.01  | 8.22  | 8.22  |
| Up   | ENSMUSG000000031709 | 1.80  | 3.40E-120 | Tbc1d9        | protein_coding | 9.22  | 9.18  | 9.28  | 9.37  | 11.01 | 11.03 | 11.09 | 10.79 |
| Down | ENSMUSG000000034353 | -2.71 | 5.35E-120 | Ramp1         | protein_coding | 8.75  | 8.84  | 8.86  | 8.69  | 5.84  | 6.13  | 6.11  | 6.42  |
| Up   | ENSMUSG000000009894 | 1.39  | 4.17E-119 | Snap47        | protein_coding | 10.11 | 10.06 | 10.05 | 10.05 | 11.47 | 11.37 | 11.55 | 11.34 |
| Up   | ENSMUSG000000035226 | 1.83  | 4.55E-119 | Rims4         | protein_coding | 8.89  | 8.94  | 8.85  | 8.68  | 10.89 | 10.58 | 10.72 | 10.45 |
| Up   | ENSMUSG000000026373 | 2.16  | 6.33E-119 | Astn2         | protein_coding | 7.34  | 7.36  | 7.45  | 7.35  | 9.39  | 9.48  | 9.79  | 9.33  |
| Down | ENSMUSG000000024479 | -2.59 | 1.62E-118 | Mafk          | protein_coding | 10.24 | 10.41 | 10.30 | 10.44 | 7.41  | 7.81  | 8.11  | 7.89  |
| Down | ENSMUSG000000022327 | -2.43 | 1.76E-118 | Ankrk43b      | protein_coding | 9.74  | 9.86  | 9.74  | 9.90  | 7.35  | 7.52  | 7.39  | 7.19  |
| Up   | ENSMUSG000000059874 | 1.19  | 2.18E-118 | Ntm           | protein_coding | 9.73  | 9.70  | 9.73  | 9.82  | 10.76 | 10.91 | 11.01 | 10.85 |
| Up   | ENSMUSG000000044884 | 1.77  | 5.23E-118 | Ankrd50       | protein_coding | 8.52  | 8.39  | 8.41  | 8.38  | 10.24 | 10.27 | 10.27 | 9.95  |
| Down | ENSMUSG000000064368 | -3.99 | 5.53E-118 | mt-Nd6        | protein_coding | 13.86 | 14.10 | 14.23 | 14.38 | 10.09 | 10.07 | 9.73  | 10.65 |
| Down | ENSMUSG000000030134 | -1.73 | 6.14E-118 | Rasgef1a      | protein_coding | 10.56 | 10.57 | 10.69 | 10.60 | 8.95  | 8.77  | 9.06  | 8.74  |
| Up   | ENSMUSG000000032625 | 2.01  | 2.24E-117 | Thsd7a        | protein_coding | 8.77  | 8.59  | 8.57  | 8.65  | 10.60 | 10.60 | 10.77 | 10.62 |
| Up   | ENSMUSG000000036377 | 1.39  | 3.91E-117 | CS30008M17Rik | protein_coding | 9.60  | 9.41  | 9.48  | 9.55  | 10.95 | 10.90 | 10.91 | 10.81 |
| Up   | ENSMUSG000000010066 | 3.18  | 4.40E-117 | Caena2d2      | protein_coding | 7.45  | 7.68  | 7.05  | 7.37  | 10.65 | 10.66 | 10.44 | 10.46 |
| Up   | ENSMUSG000000040265 | 1.70  | 7.33E-117 | Dnm3          | protein_coding | 9.90  | 9.87  | 9.67  | 9.81  | 11.48 | 11.59 | 11.55 | 11.43 |
| Up   | ENSMUSG000000042425 | 1.74  | 3.49E-116 | Frmpd3        | protein_coding | 8.49  | 8.44  | 8.41  | 8.29  | 10.14 | 10.21 | 10.22 | 9.98  |
| Down | ENSMUSG000000050640 | -2.22 | 5.88E-116 | Tmem150c      | protein_coding | 9.20  | 9.16  | 9.15  | 8.97  | 6.65  | 7.18  | 6.77  | 7.07  |
| Up   | ENSMUSG000000058297 | 1.49  | 1.67E-    |               |                |       |       |       |       |       |       |       |       |

|      |                     |       |           |          |                |       |       |       |       |       |       |       |       |
|------|---------------------|-------|-----------|----------|----------------|-------|-------|-------|-------|-------|-------|-------|-------|
| Up   | ENSMUSG00000023169  | 1.62  | 3.69E-113 | Slc38a1  | protein_coding | 10.22 | 10.13 | 10.11 | 10.04 | 11.76 | 11.69 | 11.91 | 11.61 |
| Down | ENSMUSG00000033863  | -1.62 | 1.83E-112 | Klf9     | protein_coding | 10.50 | 10.46 | 10.43 | 10.33 | 8.82  | 8.76  | 8.99  | 8.71  |
| Down | ENSMUSG00000037579  | -2.33 | 1.49E-111 | Kcnh3    | protein_coding | 8.41  | 8.24  | 8.54  | 8.41  | 5.99  | 5.99  | 5.89  | 6.17  |
| Down | ENSMUSG000000024140 | -2.61 | 2.83E-110 | Epas1    | protein_coding | 10.31 | 10.27 | 10.33 | 9.93  | 7.68  | 7.45  | 7.70  | 7.67  |
| Up   | ENSMUSG000000029167 | 1.75  | 3.48E-110 | Ppargc1a | protein_coding | 9.12  | 9.35  | 9.20  | 9.05  | 10.78 | 10.90 | 11.10 | 10.90 |
| Down | ENSMUSG000000036570 | -3.66 | 4.77E-110 | Fxyd1    | protein_coding | 7.52  | 7.26  | 7.14  | 7.66  | 4.16  | 4.30  | 3.94  | 3.95  |
| Up   | ENSMUSG000000030387 | 2.30  | 5.77E-110 | Vamp1    | protein_coding | 8.79  | 8.69  | 8.68  | 8.71  | 11.05 | 11.22 | 10.23 | 10.23 |
| Down | ENSMUSG000000009013 | -1.70 | 7.12E-110 | Dynl1l1  | protein_coding | 10.73 | 10.71 | 10.72 | 10.74 | 9.31  | 8.92  | 9.02  | 8.83  |
| Down | ENSMUSG000000020611 | -1.57 | 7.39E-110 | Gna13    | protein_coding | 9.13  | 9.00  | 9.17  | 9.10  | 7.51  | 7.68  | 7.44  | 7.55  |
| Down | ENSMUSG000000028519 | -1.60 | 1.49E-109 | Dab1     | protein_coding | 10.48 | 10.47 | 10.48 | 10.47 | 8.63  | 8.91  | 8.94  | 9.01  |
| Up   | ENSMUSG000000021577 | 1.22  | 1.87E-109 | Sdha     | protein_coding | 10.51 | 10.59 | 10.46 | 10.45 | 11.77 | 11.66 | 11.80 | 11.67 |
| Down | ENSMUSG00000007097  | -2.14 | 2.74E-109 | Alpt2    | protein_coding | 11.42 | 11.35 | 11.31 | 11.12 | 9.28  | 9.24  | 8.83  | 9.30  |
| Up   | ENSMUSG000000033615 | 2.34  | 7.45E-109 | Cplx1    | protein_coding | 11.82 | 11.81 | 11.81 | 11.63 | 14.23 | 14.06 | 14.20 | 13.94 |
| Down | ENSMUSG000000064367 | -4.00 | 8.05E-109 | mt-Nd5   | protein_coding | 14.94 | 15.19 | 15.26 | 15.43 | 11.22 | 11.10 | 10.70 | 11.69 |
| Up   | ENSMUSG000000037747 | 1.54  | 8.31E-109 | Phyhlpl  | protein_coding | 10.01 | 10.07 | 10.02 | 10.19 | 11.71 | 11.56 | 11.66 | 11.51 |
| Down | ENSMUSG000000047205 | -3.36 | 1.00E-108 | Dusp18   | protein_coding | 8.07  | 8.01  | 8.02  | 8.26  | 4.72  | 5.08  | 5.20  | 5.20  |
| Up   | ENSMUSG000000060735 | 3.70  | 1.82E-108 | Rxfp3    | protein_coding | 5.33  | 4.89  | 5.13  | 5.19  | 8.63  | 8.93  | 8.69  | 8.46  |
| Down | ENSMUSG000000059173 | -2.37 | 2.15E-108 | Pde1a    | protein_coding | 10.39 | 10.44 | 10.32 | 10.44 | 7.91  | 8.11  | 7.70  | 8.37  |
| Down | ENSMUSG000000009569 | -1.32 | 3.61E-108 | Mrfb     | protein_coding | 11.03 | 10.93 | 11.04 | 10.87 | 9.67  | 9.75  | 9.49  | 9.70  |
| Up   | ENSMUSG000000054162 | 1.94  | 4.87E-108 | Spock3   | protein_coding | 8.74  | 8.85  | 8.87  | 9.00  | 10.80 | 10.75 | 10.79 | 10.85 |
| Up   | ENSMUSG000000041977 | 1.72  | 6.90E-108 | Arhgef11 | protein_coding | 9.43  | 9.35  | 9.34  | 9.22  | 11.02 | 11.07 | 11.14 | 10.97 |
| Down | ENSMUSG00000110344  | -2.59 | 7.10E-108 | Gm45716  | protein_coding | 8.98  | 8.82  | 9.05  | 8.68  | 6.33  | 6.06  | 6.80  | 6.39  |
| Up   | ENSMUSG000000021730 | 1.74  | 1.02E-107 | Hcn1     | protein_coding | 10.36 | 10.31 | 10.39 | 10.29 | 12.07 | 12.07 | 12.20 | 11.95 |
| Down | ENSMUSG000000049606 | -1.50 | 3.12E-107 | Zfp644   | protein_coding | 11.04 | 11.06 | 10.96 | 11.01 | 9.60  | 9.49  | 9.56  | 9.46  |
| Up   | ENSMUSG000000025207 | 2.46  | 3.77E-107 | Sema4g   | protein_coding | 6.92  | 6.96  | 6.77  | 7.02  | 9.37  | 9.39  | 9.46  | 9.09  |
| Down | ENSMUSG000000050287 | -3.52 | 7.96E-107 | Rgs14    | protein_coding | 8.01  | 7.71  | 8.21  | 7.91  | 4.49  | 4.92  | 4.10  | 5.00  |
| Down | ENSMUSG000000004151 | -2.15 | 1.54E-106 | Etv1     | protein_coding | 9.92  | 9.94  | 9.87  | 10.13 | 8.11  | 7.79  | 7.85  | 7.85  |
| Up   | ENSMUSG000000062380 | 1.73  | 1.09E-105 | Tubb3    | protein_coding | 9.42  | 9.40  | 9.38  | 9.52  | 11.09 | 11.16 | 11.29 | 11.09 |
| Up   | ENSMUSG000000096914 | 2.42  | 1.67E-105 | Galnt6   | protein_coding | 7.80  | 7.96  | 7.87  | 7.64  | 10.06 | 10.34 | 10.34 | 10.14 |
| Up   | ENSMUSG000000049148 | 2.18  | 2.64E-105 | Pf1cxd3  | protein_coding | 6.84  | 6.76  | 6.69  | 6.75  | 8.91  | 8.92  | 8.93  | 8.82  |
| Down | ENSMUSG000000036885 | -2.22 | 5.94E-105 | Arhgef26 | protein_coding | 8.43  | 8.49  | 8.49  | 8.51  | 6.10  | 6.55  | 6.07  | 6.50  |
| Up   | ENSMUSG000000037306 | 1.98  | 6.99E-105 | Man1c1   | protein_coding | 7.43  | 7.42  | 7.27  | 7.48  | 9.33  | 9.51  | 9.39  | 9.20  |
| Down | ENSMUSG000000037964 | -4.54 | 7.75E-105 | Neurod6  | protein_coding | 10.17 | 10.17 | 10.19 | 10.19 | 4.89  | 5.86  | 5.37  | 5.37  |
| Down | ENSMUSG000000025813 | -1.39 | 4.42E-104 | Hmgb1    | protein_coding | 10.53 | 10.51 | 10.34 | 10.41 | 9.10  | 8.96  | 9.04  | 9.10  |
| Down | ENSMUSG000000032402 | -2.24 | 1.34E-103 | Smad3    | protein_coding | 8.51  | 8.78  | 8.88  | 8.78  | 6.47  | 6.62  | 6.43  | 6.68  |
| Up   | ENSMUSG000000024044 | 1.64  | 1.53E-103 | Epb41l3  | protein_coding | 10.10 | 9.92  | 10.00 | 9.93  | 11.77 | 11.56 | 11.68 | 11.49 |
| Down | ENSMUSG000000058600 | -1.94 | 3.05E-103 | Rpl30    | protein_coding | 9.85  | 9.89  | 9.72  | 9.87  | 7.94  | 7.81  | 8.00  | 7.89  |
| Up   | ENSMUSG000000022935 | 2.37  | 1.37E-102 | Grik1    | protein_coding | 6.88  | 6.93  | 7.02  | 7.11  | 9.08  | 9.38  | 9.38  | 9.41  |
| Down | ENSMUSG000000027221 | -2.18 | 2.40E-102 | Chst1    | protein_coding | 10.62 | 10.48 | 10.62 | 10.41 | 8.13  | 8.71  | 8.19  | 8.39  |
| Up   | ENSMUSG000000022353 | 2.00  | 4.60E-102 | Mts1     | protein_coding | 8.10  | 8.06  | 8.13  | 8.16  | 10.13 | 10.10 | 10.13 | 10.11 |
| Down | ENSMUSG000000034413 | -3.55 | 1.60E-101 | Neur1f1b | protein_coding | 9.21  | 9.10  | 8.92  | 9.06  | 5.33  | 6.19  | 4.99  | 5.75  |
| Down | ENSMUSG000000024074 | -2.09 | 2.74E-101 | Crim1    | protein_coding | 10.20 | 10.05 | 10.01 | 10.01 | 8.01  | 7.71  | 8.05  | 8.05  |
| Down | ENSMUSG000000051243 | -3.59 | 7.26E-101 | Islr2    | protein_coding | 8.89  | 8.58  | 8.83  | 8.62  | 5.33  | 5.27  | 4.67  | 5.70  |
| Down | ENSMUSG000000039058 | -1.82 | 1.04E-100 | Ak5      | protein_coding | 10.25 | 10.22 | 10.34 | 10.12 | 8.39  | 8.63  | 8.31  | 8.36  |
| Down | ENSMUSG000000014164 | -1.56 | 1.27E-100 | Klhl3    | protein_coding | 9.42  | 9.24  | 9.41  | 9.30  | 7.65  | 7.86  | 7.91  | 7.79  |
| Down | ENSMUSG000000026740 | -1.65 | 1.98E-100 | Dnae1    | protein_coding | 8.78  | 8.78  | 8.84  | 8.70  | 7.26  | 7.23  | 7.19  | 6.93  |
| Down | ENSMUSG000000023192 | -3.03 | 8.98E-100 | Gm2      | protein_coding | 8.16  | 8.04  | 8.26  | 7.79  | 5.42  | 5.16  | 5.17  | 5.16  |
| Down | ENSMUSG000000024617 | -1.88 | 1.56E-99  | Camk2a   | protein_coding | 13.98 | 13.80 | 13.84 | 13.67 | 11.84 | 12.18 | 11.72 | 12.01 |
| Up   | ENSMUSG000000022527 | 2.00  | 1.65E-99  | Laptn4b  | protein_coding | 8.18  | 8.03  | 7.78  | 8.06  | 9.98  | 9.98  | 10.13 | 9.80  |
| Up   | ENSMUSG000000030098 | 3.06  | 4.28E-99  | Grip2    | protein_coding | 6.08  | 6.01  | 6.14  | 6.29  | 8.96  | 9.27  | 9.29  | 8.93  |
| Up   | ENSMUSG000000019179 | 1.29  | 5.53E-99  | Mdh2     | protein_coding | 10.05 | 10.06 | 10.09 | 9.97  | 11.31 | 11.35 | 11.43 | 11.23 |
| Up   | ENSMUSG000000061762 | 3.50  | 1.27E-98  | Tac1     | protein_coding | 5.17  | 5.30  | 5.32  | 5.25  | 8.45  | 8.78  | 8.79  | 8.43  |
| Up   | ENSMUSG000000007653 | 1.42  | 1.33E-98  | Gabbr2   | protein_coding | 9.93  | 9.87  | 9.77  | 9.90  | 11.20 | 11.36 | 11.39 | 11.15 |
| Up   | ENSMUSG000000024524 | 1.28  | 3.30E-98  | Gnal     | protein_coding | 10.29 | 10.42 | 10.19 | 10.29 | 11.54 | 11.70 | 11.57 | 11.50 |
| Down | ENSMUSG000000041328 | -1.47 | 3.30E-98  | Pcf11    | protein_coding | 9.73  | 9.81  | 9.71  | 9.62  | 8.14  | 8.23  | 8.39  | 8.29  |
| Down | ENSMUSG000000019124 | 1.33  | 4.11E-98  | Scm1     | protein_coding | 10.21 | 10.19 | 10.17 | 10.18 | 11.47 | 11.52 | 11.63 | 11.40 |
| Down | ENSMUSG000000053279 | -2.96 | 4.11E-98  | Aldh1a1  | protein_coding | 8.72  | 8.65  | 8.63  | 8.25  | 5.42  | 5.42  | 5.50  | 5.86  |
| Up   | ENSMUSG000000042589 | 2.11  | 8.19E-98  | Cux2     | protein_coding | 8.22  | 8.39  | 8.24  | 8.42  | 10.30 | 10.52 | 10.53 | 10.28 |
| Down | ENSMUSG000000019699 | -1.68 | 8.19E-98  | Ak3      | protein_coding | 11.88 | 11.87 | 11.89 | 11.78 | 10.18 | 10.33 | 10.18 | 10.00 |
| Down | ENSMUSG000000017009 | -3.13 | 1.34E-97  | Sdo4     | protein_coding | 9.42  | 9.42  | 9.08  | 8.97  | 6.52  | 5.94  | 5.86  | 6.29  |
| Up   | ENSMUSG000000041836 | 1.65  | 1.51E-97  | Ptprc    | protein_coding | 8.78  | 8.90  | 8.76  | 8.63  | 10.49 | 10.42 | 10.49 | 10.24 |
| Down | ENSMUSG000000044950 | -1.88 | 3.86E-97  | Pwro2a   | protein_coding | 8.79  | 8.70  | 8.81  | 8.87  | 6.98  | 6.85  | 6.73  | 7.19  |
| Down | ENSMUSG000000040929 | -1.49 | 4.79E-97  | Rfk3     | protein_coding | 10.16 | 10.17 | 10.07 | 10.14 | 8.67  | 8.50  | 8.80  | 8.63  |
| Down | ENSMUSG000000046330 | -1.60 | 6.24E-97  | Rpl37a   | protein_coding | 9.05  | 8.90  | 8.95  | 9.00  | 7.27  | 7.46  | 7.40  | 7.48  |
| Down | ENSMUSG000000030226 | -1.88 | 8.34E-97  | Lmo3     | protein_coding | 10.07 | 10.16 | 10.21 | 10.27 | 8.09  | 8.21  | 8.42  | 8.49  |
| Up   | ENSMUSG000000043388 | 1.91  | 1.47E-96  | Tmem130  | protein_coding | 9.33  | 9.30  | 9.02  | 9.18  | 11.13 | 11.28 | 11.01 | 11.05 |
| Down | ENSMUSG000000086040 | -2.04 | 2.11E-96  | Wlpf3    | protein_coding | 11.94 | 11.68 | 11.91 | 11.48 | 9.56  | 9.98  | 9.57  | 9.73  |
| Down | ENSMUSG000000003949 | -1.59 | 3.38E-96  | Hlf      | protein_coding | 10.50 | 10.49 | 10.26 | 10.43 | 8.78  | 8.87  | 8.87  | 8.84  |
| Down | ENSMUSG000000027217 | -2.96 | 3.41E-94  | Tspan18  | protein_coding | 7.79  | 7.62  | 7.80  | 7.51  | 5.19  | 4.68  | 4.88  | 4.83  |
| Down | ENSMUSG000000050821 | -1.70 | 5.38E-94  | Fam131a  | protein_coding | 9.97  | 9.84  | 10.05 | 9.85  | 8.23  | 8.22  | 8.22  | 8.22  |
| Up   | ENSMUSG000000001985 | 1.52  | 9.12E-94  | Grik3    | protein_coding | 8.89  | 9.09  | 8.79  | 8.85  | 10.47 | 10.39 | 10.41 | 10.42 |
| Up   | ENSMUSG000000070890 | 3.79  | 1.29E-93  | Gad1     | protein_coding | 10.01 | 9.99  | 9.91  | 9.69  | 13.63 | 13.73 | 13.86 | 13.45 |
| Down | ENSMUSG000000012429 | -2.19 | 1.52E-93  | Aldoa1   | protein_coding | 10.94 | 10.76 | 10.89 | 10.59 | 8.36  | 8.91  | 8.30  | 8.30  |
| Down | ENSMUSG000000036192 | -1.30 | 1.53E-93  | Rorb     | protein_coding | 8.79  | 8.71  | 8.56  | 8.91  | 6.12  | 5.74  | 6.09  | 6.09  |
| Down | ENSMUSG000000040689 | -2.62 | 2.01E-93  | Limd2    | protein_coding | 8.38  | 8.32  | 8.54  | 8.29  | 6.20  | 5.68  | 5.91  | 5.57  |
| Up   | ENSMUSG000000002504 | 2.11  | 3.81E-93  | Stc9a3r2 | protein_coding | 6.82  | 6.93  | 6.74  | 6.79  | 8.90  | 8.97  | 8.87  | 8.82  |
| Down | ENSMUSG000000036304 | -3.26 | 5.39E-93  | Zdhhc23  | protein_coding | 8.61  | 8.67  | 8.67  | 8.56  | 5.50  | 5.58  | 4.88  | 5.83  |
| Down | ENSMUSG000000017978 | -2.42 | 7.35E-93  | Cadps2   | protein_coding | 9.73  | 9.61  | 9.64  | 9.50  | 7.07  | 7.52  | 6.90  | 7.36  |
| Up   | ENSMUSG000000038172 | 2.02  | 8.61E-93  | Ttc39b   | protein_coding | 8.39  | 8.47  | 8.16  | 8.31  | 10.24 | 10.37 | 10.60 | 10.14 |
| Up   | ENSMUSG000000050447 | 2.42  | 1.16E-92  | Lypd6    | protein_coding | 7.24  | 7.20  | 7.37  | 7.62  | 9.67  | 9.73  | 9.88  | 9.72  |
| Up   | ENSMUSG000000028937 | 1.44  | 1.27E-92  | Acol7    | protein_coding | 9.89  | 9.76  | 9.76  | 9.71  | 11.19 | 11.30 | 11.27 | 11.05 |
| Up   | ENSMUSG000000061080 | 1.23  | 1.97E-92  | Lsmp     | protein_coding | 11.55 | 11.58 | 11.67 | 11.67 | 12.83 | 12.84 | 12.93 | 12.70 |
| Down | ENSMUSG000000078429 | -1.67 | 5.53E-92  | Ctdsp2   | protein_coding | 9.30  | 9.12  | 9.25  | 9.02  | 7.54  | 7.52  | 7.36  | 7.68  |
| Up   | ENSMUSG000000041911 | 2.34  | 9.14E-92  | Dlx1     | protein_coding | 8.13  | 8.09  | 8.02  | 8.14  | 10.42 | 10.40 | 10.50 | 10.35 |
| Down | ENSMUSG000000061983 | -2.07 | 2.20E-91  | Rps12    | protein_coding | 9.68  | 9.58  | 9.53  | 9.62  | 7.77  | 7.50  | 7.47  |       |

|      |                    |       |          |               |                |       |       |       |       |       |       |       |       |
|------|--------------------|-------|----------|---------------|----------------|-------|-------|-------|-------|-------|-------|-------|-------|
| Up   | ENSMUSG00000038256 | 1.02  | 4.63E-90 | Bcl9          | protein_coding | 9.04  | 9.00  | 9.03  | 9.00  | 10.07 | 10.03 | 10.10 | 9.94  |
| Up   | ENSMUSG00000006273 | 1.07  | 8.58E-90 | Atp6v1b2      | protein_coding | 10.81 | 10.79 | 10.79 | 10.78 | 11.80 | 11.92 | 11.96 | 11.77 |
| Down | ENSMUSG00000056486 | -1.22 | 1.15E-89 | Chn1          | protein_coding | 12.57 | 12.50 | 12.49 | 12.42 | 11.20 | 11.39 | 11.30 | 11.19 |
| Down | ENSMUSG00000031618 | -1.78 | 1.39E-89 | Nr3c2         | protein_coding | 10.35 | 10.21 | 10.55 | 10.21 | 8.26  | 8.75  | 8.60  | 8.60  |
| Down | ENSMUSG00000022208 | -1.48 | 1.79E-89 | Jph4          | protein_coding | 11.46 | 11.40 | 11.46 | 11.46 | 9.96  | 10.09 | 9.73  | 10.05 |
| Up   | ENSMUSG00000046546 | 2.46  | 2.20E-89 | Fam143a       | protein_coding | 6.19  | 6.05  | 6.24  | 6.11  | 8.61  | 8.51  | 8.61  | 8.41  |
| Down | ENSMUSG00000027162 | -1.43 | 3.65E-89 | Lin7          | protein_coding | 9.77  | 9.66  | 9.67  | 9.63  | 8.23  | 8.45  | 8.44  | 8.55  |
| Up   | ENSMUSG00000039607 | 1.82  | 6.10E-89 | Rbms3         | protein_coding | 7.57  | 8.02  | 8.02  | 7.95  | 9.79  | 9.73  | 9.73  | 9.58  |
| Down | ENSMUSG00000037972 | -1.74 | 7.17E-89 | Snn           | protein_coding | 10.45 | 10.43 | 10.52 | 10.43 | 8.60  | 8.73  | 8.89  | 8.68  |
| Up   | ENSMUSG00000032788 | 1.62  | 9.05E-89 | Pdk           | protein_coding | 9.57  | 9.59  | 9.52  | 9.36  | 11.14 | 11.20 | 11.19 | 10.97 |
| Up   | ENSMUSG00000090100 | 1.15  | 2.17E-88 | Ttk2          | protein_coding | 10.60 | 10.48 | 10.47 | 10.45 | 11.64 | 11.71 | 11.72 | 11.50 |
| Up   | ENSMUSG00000038305 | 1.99  | 2.55E-88 | Spats2l       | protein_coding | 6.70  | 7.16  | 7.25  | 7.17  | 9.11  | 9.01  | 9.11  | 8.94  |
| Down | ENSMUSG00000040055 | -4.32 | 3.03E-88 | Gjb6          | protein_coding | 7.82  | 7.96  | 7.65  | 7.52  | 3.64  | 4.16  | 3.63  | 3.95  |
| Up   | ENSMUSG00000042453 | 2.05  | 3.19E-88 | Reln          | protein_coding | 8.88  | 8.82  | 8.82  | 8.62  | 10.77 | 10.77 | 10.65 | 10.41 |
| Up   | ENSMUSG00000022110 | 1.32  | 3.39E-88 | Suda2         | protein_coding | 9.26  | 9.50  | 9.36  | 9.38  | 10.68 | 10.69 | 10.83 | 10.57 |
| Up   | ENSMUSG00000019923 | 1.34  | 3.59E-88 | Zwint         | protein_coding | 11.52 | 11.60 | 11.57 | 11.71 | 12.89 | 12.86 | 13.08 | 12.91 |
| Up   | ENSMUSG00000029777 | 1.51  | 4.26E-88 | Gars          | protein_coding | 9.26  | 9.05  | 9.04  | 9.11  | 10.53 | 10.69 | 10.78 | 10.46 |
| Up   | ENSMUSG00000029228 | 2.04  | 4.80E-88 | Lnx1          | protein_coding | 6.87  | 7.02  | 7.02  | 7.11  | 8.89  | 9.14  | 9.22  | 9.05  |
| Down | ENSMUSG00000025393 | 1.36  | 5.11E-88 | Atp5b         | protein_coding | 11.55 | 11.49 | 11.50 | 11.46 | 12.79 | 12.94 | 12.94 | 12.76 |
| Down | ENSMUSG00000067279 | -2.32 | 5.29E-88 | Ppp1r3c       | protein_coding | 8.33  | 8.55  | 8.31  | 8.53  | 6.33  | 6.14  | 5.96  | 6.25  |
| Down | ENSMUSG00000032174 | -2.34 | 9.46E-88 | Icam5         | protein_coding | 9.97  | 9.88  | 10.14 | 9.87  | 7.33  | 7.59  | 7.60  | 8.03  |
| Up   | ENSMUSG00000031932 | 3.14  | 1.22E-87 | Gpr83         | protein_coding | 6.48  | 6.03  | 5.50  | 6.21  | 9.17  | 9.34  | 9.16  | 8.93  |
| Down | ENSMUSG00000046093 | -2.11 | 1.52E-87 | Hpcal4        | protein_coding | 12.39 | 12.34 | 12.20 | 12.32 | 10.10 | 10.46 | 9.99  | 10.23 |
| Down | ENSMUSG00000037742 | -1.57 | 2.33E-87 | Eef1a1        | protein_coding | 13.52 | 13.46 | 13.41 | 13.48 | 11.92 | 11.98 | 11.73 | 11.94 |
| Down | ENSMUSG00000026514 | -1.75 | 3.32E-87 | Cnih3         | protein_coding | 8.57  | 8.81  | 8.79  | 8.75  | 6.89  | 7.17  | 6.89  | 6.80  |
| Down | ENSMUSG00000059456 | -2.65 | 7.82E-87 | Ptk2b         | protein_coding | 11.83 | 11.60 | 11.87 | 11.45 | 9.05  | 9.42  | 8.47  | 9.13  |
| Up   | ENSMUSG00000029822 | 2.08  | 1.15E-86 | Osbpl3        | protein_coding | 6.99  | 6.79  | 6.91  | 6.82  | 9.14  | 8.98  | 8.82  | 8.89  |
| Down | ENSMUSG00000035847 | -1.44 | 3.11E-86 | Ids           | protein_coding | 11.90 | 11.99 | 11.92 | 12.08 | 10.53 | 10.61 | 10.45 | 10.55 |
| Down | ENSMUSG00000036894 | -2.20 | 3.66E-86 | Rap2b         | protein_coding | 9.37  | 9.46  | 9.57  | 9.32  | 7.02  | 7.22  | 7.58  | 7.15  |
| Down | ENSMUSG00000025290 | -1.56 | 5.26E-86 | Rps24         | protein_coding | 11.10 | 11.03 | 11.06 | 11.11 | 9.60  | 9.49  | 9.52  | 9.49  |
| Down | ENSMUSG00000091476 | -2.71 | 5.68E-86 | Catspere2     | protein_coding | 7.33  | 7.44  | 7.24  | 7.52  | 4.88  | 4.87  | 4.71  | 4.93  |
| Up   | ENSMUSG00000019820 | 1.74  | 6.15E-86 | Utm           | protein_coding | 8.73  | 9.04  | 8.67  | 8.96  | 10.52 | 10.75 | 10.54 | 10.55 |
| Up   | ENSMUSG00000042724 | 1.42  | 1.14E-85 | Map3k9        | protein_coding | 8.48  | 8.55  | 8.47  | 8.33  | 9.74  | 9.76  | 9.78  | 9.78  |
| Up   | ENSMUSG00000023456 | 1.06  | 1.41E-85 | Tai1          | protein_coding | 10.26 | 10.36 | 10.36 | 10.21 | 11.30 | 11.30 | 11.38 | 11.26 |
| Down | ENSMUSG00000048482 | -3.84 | 1.66E-85 | Bdnf          | protein_coding | 8.14  | 8.16  | 8.52  | 7.87  | 4.10  | 4.85  | 5.02  | 4.17  |
| Up   | ENSMUSG00000043673 | 2.73  | 2.43E-85 | Kcns3         | protein_coding | 6.34  | 6.33  | 6.73  | 6.19  | 9.21  | 9.00  | 9.18  | 8.93  |
| Down | ENSMUSG00000019831 | -1.69 | 2.44E-85 | Wasf1         | protein_coding | 11.28 | 11.24 | 11.39 | 11.11 | 9.46  | 9.79  | 9.39  | 9.62  |
| Down | ENSMUSG00000036907 | -4.29 | 7.65E-85 | C1ql2         | protein_coding | 7.90  | 7.81  | 8.23  | 7.66  | 4.49  | 4.01  | 4.00  | 3.34  |
| Up   | ENSMUSG00000029875 | 2.61  | 8.41E-85 | Ccdc184       | protein_coding | 6.81  | 6.75  | 6.22  | 6.27  | 9.21  | 9.21  | 9.02  | 8.90  |
| Up   | ENSMUSG00000059713 | 1.96  | 8.93E-85 | Rcan3         | protein_coding | 7.55  | 7.69  | 7.41  | 7.93  | 9.55  | 9.59  | 9.58  | 9.68  |
| Up   | ENSMUSG00000040133 | 2.32  | 1.08E-84 | Gpr176        | protein_coding | 6.92  | 6.38  | 6.67  | 6.66  | 8.95  | 8.97  | 8.98  | 8.88  |
| Down | ENSMUSG00000026185 | -1.74 | 2.61E-84 | Igf1bp5       | protein_coding | 10.39 | 10.13 | 10.19 | 10.13 | 8.29  | 8.55  | 8.28  | 8.75  |
| Up   | ENSMUSG00000027238 | 1.86  | 3.08E-84 | Frmf5         | protein_coding | 7.80  | 7.99  | 7.85  | 7.95  | 9.62  | 9.90  | 9.71  | 9.74  |
| Down | ENSMUSG00000034209 | -4.21 | 3.42E-84 | Ras110a       | protein_coding | 7.60  | 6.98  | 7.24  | 7.03  | 3.22  | 3.50  | 3.70  | 3.70  |
| Up   | ENSMUSG00000041028 | 1.26  | 4.04E-84 | Ghitm         | protein_coding | 10.21 | 10.19 | 10.12 | 10.21 | 11.34 | 11.60 | 11.49 | 11.32 |
| Up   | ENSMUSG00000041124 | 1.14  | 6.30E-84 | Msa1d4        | protein_coding | 9.06  | 9.10  | 9.06  | 9.06  | 10.15 | 10.16 | 10.21 | 10.21 |
| Down | ENSMUSG00000028081 | -1.39 | 7.35E-84 | Rps3a1        | protein_coding | 10.59 | 10.54 | 10.64 | 10.64 | 9.05  | 9.05  | 9.04  | 9.04  |
| Down | ENSMUSG00000027447 | -1.80 | 1.20E-83 | Cs3           | protein_coding | 11.27 | 11.10 | 11.10 | 11.10 | 9.41  | 9.44  | 9.08  | 9.45  |
| Up   | ENSMUSG00000031824 | 1.87  | 1.89E-83 | 6430548M08Rik | protein_coding | 10.23 | 10.09 | 10.18 | 9.95  | 11.96 | 12.06 | 12.11 | 11.78 |
| Down | ENSMUSG00000030785 | 3.72  | 2.03E-83 | Cox6a2        | protein_coding | 4.57  | 4.20  | 5.04  | 4.85  | 8.15  | 7.80  | 8.53  | 8.19  |
| Down | ENSMUSG00000006362 | -1.83 | 2.13E-83 | Cbfa2l3       | protein_coding | 8.94  | 8.64  | 8.59  | 8.65  | 7.01  | 6.84  | 6.82  | 6.98  |
| Up   | ENSMUSG00000020321 | 1.77  | 2.56E-83 | Mdh1          | protein_coding | 10.74 | 10.76 | 10.78 | 10.76 | 12.48 | 12.57 | 12.63 | 12.41 |
| Up   | ENSMUSG00000033065 | 1.42  | 2.72E-83 | Pfkm          | protein_coding | 10.04 | 9.99  | 9.92  | 9.79  | 11.39 | 11.35 | 11.39 | 11.28 |
| Down | ENSMUSG00000053706 | -1.90 | 3.16E-83 | B430305J03Rik | protein_coding | 8.50  | 8.53  | 8.75  | 8.46  | 6.52  | 6.84  | 6.73  | 6.69  |
| Up   | ENSMUSG00000034993 | 2.22  | 3.50E-83 | Vat1          | protein_coding | 6.61  | 6.66  | 6.38  | 6.86  | 8.75  | 8.75  | 8.98  | 8.73  |
| Up   | ENSMUSG00000025579 | 1.66  | 1.07E-82 | Gaa           | protein_coding | 10.39 | 10.07 | 9.86  | 9.92  | 11.70 | 11.64 | 11.72 | 11.63 |
| Down | ENSMUSG00000048249 | -1.25 | 2.07E-82 | Crebrf        | protein_coding | 10.33 | 10.36 | 10.22 | 10.23 | 9.03  | 9.14  | 8.92  | 9.06  |
| Up   | ENSMUSG00000038886 | 1.04  | 3.24E-82 | Man2a2        | protein_coding | 10.08 | 10.19 | 10.06 | 10.02 | 11.17 | 11.11 | 11.17 | 11.05 |
| Down | ENSMUSG00000045092 | -3.26 | 4.53E-82 | S1pr1         | protein_coding | 9.09  | 9.14  | 9.10  | 9.17  | 6.02  | 5.99  | 5.14  | 6.39  |
| Up   | ENSMUSG00000032698 | 1.83  | 4.67E-82 | Slc2a13       | protein_coding | 9.43  | 9.41  | 9.41  | 9.40  | 10.97 | 11.18 | 11.15 | 10.98 |
| Down | ENSMUSG00000026826 | -3.05 | 4.78E-82 | Nr4a2         | protein_coding | 8.93  | 9.24  | 8.70  | 8.84  | 5.51  | 6.60  | 5.80  | 5.70  |
| Up   | ENSMUSG00000030411 | 3.42  | 8.18E-82 | Rab3b         | protein_coding | 7.92  | 7.78  | 8.08  | 7.86  | 11.29 | 11.23 | 11.59 | 11.10 |
| Up   | ENSMUSG00000020978 | 1.21  | 1.17E-81 | Klhdic2       | protein_coding | 9.41  | 9.52  | 9.48  | 9.43  | 10.53 | 10.78 | 10.63 | 10.72 |
| Down | ENSMUSG00000074657 | -1.73 | 1.32E-81 | Kif5a         | protein_coding | 14.62 | 14.46 | 14.44 | 14.36 | 12.82 | 12.73 | 12.78 | 12.61 |
| Down | ENSMUSG00000032323 | 1.29  | 1.87E-81 | Dvl3          | protein_coding | 8.44  | 8.60  | 8.47  | 8.53  | 9.87  | 9.75  | 9.77  | 9.79  |
| Down | ENSMUSG00000029602 | -1.96 | 1.14E-80 | Rasal1        | protein_coding | 8.13  | 7.90  | 8.19  | 8.12  | 6.37  | 5.95  | 6.04  | 6.36  |
| Up   | ENSMUSG00000019146 | 1.78  | 1.32E-80 | Cacng2        | protein_coding | 9.08  | 9.18  | 9.23  | 9.22  | 10.97 | 10.96 | 11.12 | 10.73 |
| Up   | ENSMUSG00000049265 | 2.17  | 1.85E-80 | Kcnk3         | protein_coding | 6.68  | 6.71  | 6.75  | 6.55  | 8.85  | 8.77  | 8.88  | 8.71  |
| Up   | ENSMUSG00000021476 | 1.05  | 2.17E-80 | Habp4         | protein_coding | 10.67 | 10.74 | 10.73 | 10.56 | 11.70 | 11.76 | 11.75 | 11.63 |
| Down | ENSMUSG00000028354 | -1.25 | 2.69E-80 | Fmn2          | protein_coding | 9.89  | 9.82  | 9.85  | 9.70  | 8.65  | 8.57  | 8.30  | 8.58  |
| Up   | ENSMUSG00000011148 | 2.61  | 6.38E-80 | Adssl1        | protein_coding | 6.13  | 5.67  | 5.92  | 5.92  | 8.50  | 8.54  | 8.55  | 8.49  |
| Down | ENSMUSG00000094626 | -2.06 | 7.04E-80 | Tmem121b      | protein_coding | 7.67  | 7.76  | 7.86  | 7.74  | 6.13  | 5.54  | 5.57  | 5.80  |
| Up   | ENSMUSG00000024219 | 1.59  | 9.00E-80 | Anks1         | protein_coding | 7.37  | 7.44  | 7.41  | 7.28  | 9.04  | 8.86  | 8.96  | 8.96  |
| Up   | ENSMUSG00000022558 | 2.23  | 1.04E-79 | Rorb1         | protein_coding | 7.61  | 7.52  | 7.49  | 7.59  | 9.85  | 9.85  | 9.93  | 9.48  |
| Down | ENSMUSG00000021082 | -3.42 | 1.41E-79 | Rab15         | protein_coding | 10.79 | 10.68 | 10.68 | 10.57 | 9.37  | 9.28  | 9.41  | 9.22  |
| Up   | ENSMUSG00000033526 | 1.41  | 3.03E-79 | Ppp1p5k1      | protein_coding | 9.42  | 9.26  | 9.33  | 9.16  | 10.65 | 10.82 | 10.74 | 10.59 |
| Up   | ENSMUSG00000036745 | 1.30  | 3.40E-79 | Tllf7         | protein_coding | 10.74 | 10.80 | 10.78 | 10.69 | 11.96 | 12.09 | 11.96 | 12.00 |
| Up   | ENSMUSG00000027406 | 1.14  | 5.05E-79 | ldh3b         | protein_coding | 10.01 | 9.99  | 9.93  | 9.94  | 11.00 | 11.14 | 11.19 | 11.07 |
| Down | ENSMUSG00000036437 | -3.04 | 5.93E-79 | Npy1r         | protein_coding | 7.59  | 7.74  | 7.84  | 7.56  | 4.92  | 4.66  | 4.52  | 5.15  |
| Down | ENSMUSG00000028786 | -3.11 | 6.12E-79 | Tmem54        | protein_coding | 7.59  | 7.49  | 7.77  | 7.48  | 4.88  | 4.04  | 5.07  | 4.57  |
| Up   | ENSMUSG00000033453 | 2.86  | 1.13E-78 | Adams15       | protein_coding | 5.08  | 4.93  | 5.31  | 5.35  | 7.89  | 7.72  | 8.12  | 7.84  |
| Up   | ENSMUSG00000039943 | 1.76  | 1.49E-78 | Pfcb4         | protein_coding | 8.22  | 8.16  | 7.85  | 7.85  | 9.87  | 9.83  | 9.73  | 9.65  |
| Down | ENSMUSG00000028926 | -1.15 | 4.31E-78 | Cdk14         | protein_coding | 11.37 | 11.23 | 11.35 | 11.30 | 10.14 | 10.27 | 10.20 | 10.08 |
| Up   | ENSMUSG00000020205 | 1.89  | 4.74E-78 | Phlda1        | protein_coding | 7.35  | 7.26  | 7.32  | 7.45  | 9.10  | 9.44  | 9.17  | 9.10  |
| Up   | ENSMUSG00000055026 | 1.78  | 5.11E-78 | Gabrg3        | protein_coding | 7.83  | 7.95  | 7.73  | 7.97  | 9.50  | 9.89  | 9.59  | 9.53  |
| Down | ENSMUSG00000074968 | -2.08 | 5.59E-78 | Ano3          | protein_coding | 9.43  | 9.48  | 9.48  | 9.45  |       |       |       |       |

|      |                     |       |          |          |                |       |       |       |       |       |       |        |       |
|------|---------------------|-------|----------|----------|----------------|-------|-------|-------|-------|-------|-------|--------|-------|
| Down | ENSMUSG00000096188  | -1.13 | 3.74E-77 | Cmtm4    | protein_coding | 10.15 | 10.16 | 10.03 | 10.18 | 8.96  | 9.09  | 9.01   | 8.96  |
| Up   | ENSMUSG00000029608  | 1.51  | 4.17E-77 | Rph3a    | protein_coding | 10.95 | 10.85 | 10.97 | 10.67 | 12.45 | 12.37 | 12.40  | 12.27 |
| Up   | ENSMUSG00000052302  | 1.32  | 9.36E-77 | Tbc1d30  | protein_coding | 8.73  | 8.73  | 8.60  | 8.82  | 10.01 | 10.12 | 10.08  | 9.91  |
| Down | ENSMUSG00000010175  | -1.94 | 1.23E-76 | Prox1    | protein_coding | 9.96  | 9.91  | 10.09 | 9.88  | 8.32  | 7.80  | 7.92   | 8.07  |
| Up   | ENSMUSG00000020220  | 1.21  | 1.55E-76 | Vps13d   | protein_coding | 9.82  | 9.87  | 9.81  | 9.71  | 10.97 | 11.03 | 10.96  | 11.07 |
| Up   | ENSMUSG00000024073  | 1.32  | 3.23E-76 | Birc6    | protein_coding | 10.16 | 10.26 | 9.91  | 10.10 | 11.45 | 11.47 | 11.30  | 11.50 |
| Up   | ENSMUSG00000028974  | 1.39  | 6.12E-76 | Dffa     | protein_coding | 7.60  | 7.78  | 7.78  | 7.50  | 7.69  | 9.36  | 9.36   | 9.17  |
| Down | ENSMUSG00000090291  | -3.21 | 7.17E-76 | Linc10b  | protein_coding | 8.58  | 8.37  | 8.49  | 7.92  | 5.45  | 5.58  | 4.77   | 5.28  |
| Up   | ENSMUSG00000021313  | 1.26  | 7.62E-76 | Ryr2     | protein_coding | 11.27 | 11.22 | 11.16 | 11.15 | 12.46 | 12.44 | 12.39  | 12.53 |
| Down | ENSMUSG00000020932  | -2.57 | 9.85E-76 | Gfap     | protein_coding | 10.78 | 10.54 | 10.82 | 10.48 | 8.48  | 7.46  | 7.94   | 8.36  |
| Up   | ENSMUSG00000051910  | 1.40  | 1.20E-75 | Sox6     | protein_coding | 7.85  | 7.86  | 7.75  | 7.86  | 9.19  | 9.22  | 9.16   | 9.27  |
| Up   | ENSMUSG00000023960  | 1.31  | 3.77E-75 | Enpp5    | protein_coding | 9.54  | 9.58  | 9.41  | 9.47  | 10.85 | 10.84 | 10.82  | 10.71 |
| Up   | ENSMUSG00000021708  | 1.49  | 5.01E-75 | Rasgrf2  | protein_coding | 9.13  | 9.20  | 9.07  | 9.11  | 10.59 | 10.66 | 10.67  | 10.55 |
| Up   | ENSMUSG00000022523  | 1.59  | 5.95E-75 | Fgf12    | protein_coding | 9.77  | 9.98  | 9.70  | 10.01 | 11.41 | 11.51 | 11.52  | 11.40 |
| Down | ENSMUSG00000028527  | -3.13 | 7.27E-75 | Ak4      | protein_coding | 8.29  | 8.22  | 8.15  | 8.51  | 5.12  | 5.89  | 4.63   | 5.29  |
| Down | ENSMUSG00000035805  | -2.60 | 1.16E-74 | Mic1     | protein_coding | 8.62  | 8.65  | 8.60  | 8.65  | 6.14  | 5.69  | 5.91   | 6.53  |
| Down | ENSMUSG00000097789  | -2.42 | 1.33E-74 | Gm2115   | protein_coding | 11.10 | 10.69 | 10.87 | 10.59 | 8.59  | 8.56  | 8.37   | 8.11  |
| Down | ENSMUSG00000068735  | -2.11 | 1.39E-74 | Trp53i1  | protein_coding | 8.79  | 8.77  | 8.68  | 8.76  | 6.42  | 7.07  | 6.59   | 6.56  |
| Up   | ENSMUSG00000008489  | 1.66  | 1.56E-74 | Elavl2   | protein_coding | 8.60  | 8.90  | 8.59  | 8.64  | 10.41 | 10.31 | 10.25  | 10.25 |
| Down | ENSMUSG00000019849  | -1.22 | 2.01E-74 | Wwv1     | protein_coding | 9.47  | 9.38  | 9.41  | 9.51  | 8.31  | 8.28  | 8.13   | 8.13  |
| Down | ENSMUSG00000039982  | -1.43 | 2.55E-74 | Dp4      | protein_coding | 8.91  | 8.90  | 8.89  | 8.95  | 7.61  | 7.42  | 7.42   | 7.42  |
| Down | ENSMUSG00000024238  | -1.54 | 4.12E-74 | Zeb1     | protein_coding | 9.94  | 10.02 | 9.97  | 10.05 | 8.61  | 8.23  | 8.59   | 8.40  |
| Down | ENSMUSG00000027737  | -2.89 | 7.50E-74 | Slc7a11  | protein_coding | 7.89  | 8.23  | 8.00  | 8.48  | 5.22  | 4.92  | 5.49   | 5.84  |
| Up   | ENSMUSG00000027965  | 1.78  | 7.86E-74 | Olfm3    | protein_coding | 7.04  | 7.25  | 6.99  | 7.37  | 8.94  | 9.03  | 8.87   | 8.85  |
| Down | ENSMUSG00000039747  | -2.22 | 9.70E-74 | Orai2    | protein_coding | 9.75  | 9.59  | 9.98  | 9.49  | 7.34  | 7.64  | 7.79   | 7.24  |
| Up   | ENSMUSG00000026179  | 1.40  | 1.14E-73 | Pnk4     | protein_coding | 9.72  | 9.59  | 9.48  | 9.38  | 10.98 | 11.02 | 10.95  | 10.79 |
| Up   | ENSMUSG00000040907  | 1.68  | 1.38E-73 | Alp1a3   | protein_coding | 13.14 | 12.92 | 12.96 | 12.80 | 14.75 | 14.56 | 14.78  | 14.44 |
| Down | ENSMUSG00000006304  | -1.24 | 4.08E-73 | Arpc2    | protein_coding | 10.58 | 10.44 | 10.57 | 10.33 | 9.18  | 9.23  | 9.21   | 9.36  |
| Down | ENSMUSG00000052942  | -2.67 | 6.37E-73 | Glis3    | protein_coding | 8.34  | 8.11  | 8.22  | 8.16  | 5.27  | 5.88  | 5.58   | 5.76  |
| Down | ENSMUSG00000008475  | -1.85 | 9.41E-73 | Arpc5    | protein_coding | 9.48  | 9.36  | 9.42  | 9.24  | 7.73  | 7.53  | 7.71   | 7.71  |
| Up   | ENSMUSG00000027284  | 1.28  | 1.40E-72 | Cdan1    | protein_coding | 9.79  | 9.58  | 9.62  | 9.65  | 10.95 | 10.97 | 10.96  | 10.84 |
| Down | ENSMUSG00000027777  | -1.29 | 1.61E-72 | Schp1    | protein_coding | 10.55 | 10.50 | 10.63 | 10.44 | 9.34  | 9.12  | 9.28   | 9.22  |
| Down | ENSMUSG00000024411  | -2.68 | 9.55E-72 | Aqp4     | protein_coding | 9.55  | 9.65  | 9.47  | 9.52  | 6.50  | 6.80  | 6.57   | 6.57  |
| Up   | ENSMUSG00000030058  | 1.30  | 2.02E-72 | C30      | protein_coding | 9.81  | 9.70  | 9.81  | 9.73  | 11.11 | 11.08 | 11.02  | 10.87 |
| Up   | ENSMUSG00000034295  | 1.80  | 6.69E-72 | Fhod3    | protein_coding | 7.21  | 7.58  | 7.11  | 7.30  | 8.86  | 9.12  | 9.28   | 9.04  |
| Down | ENSMUSG00000030067  | -1.46 | 7.88E-72 | Foxp1    | protein_coding | 9.67  | 9.72  | 9.67  | 9.67  | 8.14  | 8.43  | 8.14   | 8.36  |
| Down | ENSMUSG00000035268  | -1.78 | 1.11E-71 | Pkig     | protein_coding | 9.02  | 8.81  | 8.95  | 8.79  | 6.81  | 7.36  | 7.23   | 7.12  |
| Up   | ENSMUSG00000033063  | 2.55  | 1.25E-71 | Cntnap3  | protein_coding | 5.79  | 5.82  | 5.58  | 5.99  | 8.06  | 8.37  | 8.13   | 8.40  |
| Up   | ENSMUSG00000062373  | 1.51  | 1.79E-71 | Tmem65   | protein_coding | 8.70  | 8.71  | 8.71  | 8.89  | 10.12 | 10.43 | 10.29  | 10.18 |
| Up   | ENSMUSG00000039050  | 1.21  | 2.35E-71 | Osbpl2   | protein_coding | 8.45  | 8.40  | 8.31  | 8.55  | 9.60  | 9.61  | 9.61   | 9.63  |
| Up   | ENSMUSG00000022307  | 1.26  | 4.78E-71 | Oxr1     | protein_coding | 11.10 | 11.17 | 11.00 | 10.96 | 12.37 | 12.33 | 12.45  | 12.10 |
| Up   | ENSMUSG00000020361  | 1.09  | 5.46E-71 | Hspa4    | protein_coding | 10.31 | 10.11 | 10.18 | 10.11 | 11.34 | 11.21 | 11.36  | 11.17 |
| Down | ENSMUSG00000000531  | -2.13 | 1.47E-70 | Grasp    | protein_coding | 7.78  | 7.82  | 8.11  | 7.74  | 5.58  | 5.70  | 6.00   | 5.97  |
| Down | ENSMUSG00000058589  | -1.01 | 2.34E-70 | Anks1b   | protein_coding | 11.31 | 11.39 | 11.31 | 11.28 | 10.17 | 10.36 | 10.36  | 10.35 |
| Down | ENSMUSG00000025931  | -1.50 | 2.89E-70 | Paqr6    | protein_coding | 10.05 | 9.91  | 9.78  | 9.76  | 8.54  | 8.47  | 8.37   | 8.16  |
| Down | ENSMUSG00000026077  | -1.66 | 2.94E-70 | Npas2    | protein_coding | 8.64  | 8.78  | 8.67  | 8.48  | 7.05  | 6.87  | 7.18   | 6.97  |
| Up   | ENSMUSG00000025428  | 1.35  | 3.70E-70 | Alp5a1   | protein_coding | 11.31 | 11.28 | 11.30 | 12.61 | 12.59 | 12.61 | 12.59  | 12.53 |
| Down | ENSMUSG00000028782  | -1.32 | 3.71E-70 | Adgrb2   | protein_coding | 11.38 | 11.28 | 11.43 | 11.14 | 9.86  | 9.95  | 10.00  | 10.15 |
| Up   | ENSMUSG00000062309  | 2.97  | 4.86E-70 | Rpp25    | protein_coding | 5.60  | 5.80  | 5.63  | 5.66  | 8.53  | 8.61  | 8.38   | 8.61  |
| Up   | ENSMUSG00000021699  | 1.09  | 4.86E-70 | Pde4d    | protein_coding | 8.58  | 8.76  | 8.60  | 8.69  | 9.64  | 9.79  | 9.78   | 9.75  |
| Down | ENSMUSG00000032564  | -2.17 | 7.93E-70 | Cpne4    | protein_coding | 9.07  | 9.02  | 9.20  | 8.98  | 6.64  | 7.12  | 7.08   | 6.85  |
| Down | ENSMUSG00000027895  | -1.31 | 1.03E-69 | Kcnc4    | protein_coding | 8.66  | 8.75  | 8.75  | 8.58  | 7.35  | 7.33  | 7.44   | 7.47  |
| Down | ENSMUSG00000033377  | -2.36 | 2.71E-69 | Palmd    | protein_coding | 7.71  | 7.84  | 7.71  | 7.90  | 5.06  | 5.73  | 5.70   | 5.71  |
| Down | ENSMUSG00000020577  | -1.56 | 3.31E-69 | Tspan13  | protein_coding | 10.22 | 10.23 | 10.15 | 10.20 | 8.55  | 8.78  | 8.62   | 8.62  |
| Down | ENSMUSG00000019929  | -4.24 | 3.75E-69 | Dcn      | protein_coding | 7.67  | 7.67  | 7.16  | 8.02  | 3.92  | 3.11  | 4.04   | 4.17  |
| Up   | ENSMUSG00000039257  | 1.51  | 4.06E-69 | Vstm2b   | protein_coding | 8.04  | 7.90  | 7.95  | 8.00  | 9.46  | 9.66  | 9.41   | 9.31  |
| Down | ENSMUSG00000019467  | -1.72 | 4.75E-69 | Arhgef25 | protein_coding | 10.77 | 10.87 | 10.87 | 10.49 | 9.04  | 8.85  | 9.09   | 8.99  |
| Up   | ENSMUSG00000002984  | 1.45  | 5.26E-69 | Torm40   | protein_coding | 8.11  | 7.95  | 8.02  | 7.89  | 9.41  | 9.45  | 9.57   | 9.29  |
| Up   | ENSMUSG00000027581  | 1.39  | 5.57E-69 | Slmn3    | protein_coding | 10.72 | 10.69 | 10.67 | 10.61 | 12.11 | 11.97 | 12.18  | 11.95 |
| Up   | ENSMUSG00000025964  | 1.10  | 5.65E-69 | Adam23   | protein_coding | 9.99  | 10.07 | 10.15 | 10.12 | 11.16 | 11.17 | 11.34  | 11.04 |
| Up   | ENSMUSG00000009516  | 1.17  | 6.53E-69 | Prtcd2   | protein_coding | 9.16  | 9.09  | 9.04  | 9.23  | 10.37 | 10.29 | 10.35  | 10.20 |
| Up   | ENSMUSG00000054793  | 1.39  | 9.15E-69 | Cadm4    | protein_coding | 9.49  | 9.45  | 9.42  | 9.47  | 10.88 | 10.66 | 10.96  | 10.85 |
| Down | ENSMUSG00000036856  | -3.59 | 1.03E-68 | Wnt4     | protein_coding | 6.45  | 6.95  | 6.54  | 6.57  | 3.55  | 3.77  | 3.30   | 3.66  |
| Down | ENSMUSG00000049281  | -1.33 | 1.03E-68 | Scn3b    | protein_coding | 10.37 | 10.28 | 10.30 | 10.17 | 8.84  | 9.05  | 8.98   | 8.95  |
| Up   | ENSMUSG00000020262  | 1.44  | 1.87E-68 | Adarb1   | protein_coding | 10.56 | 10.44 | 10.42 | 10.27 | 11.92 | 11.99 | 11.90  | 11.63 |
| Down | ENSMUSG00000057841  | -1.70 | 2.28E-68 | Rpl32    | protein_coding | 9.85  | 9.76  | 9.64  | 9.78  | 8.15  | 8.35  | 8.30   | 7.92  |
| Up   | ENSMUSG00000023328  | 1.80  | 3.17E-68 | Ache     | protein_coding | 7.39  | 7.46  | 7.36  | 7.38  | 9.11  | 9.10  | 9.31   | 9.18  |
| Up   | ENSMUSG00000042734  | 1.41  | 3.85E-68 | Ttc9     | protein_coding | 8.98  | 9.07  | 8.93  | 9.06  | 10.33 | 10.45 | 10.56  | 10.30 |
| Up   | ENSMUSG00000045932  | 2.07  | 7.30E-68 | lft2     | protein_coding | 6.23  | 6.39  | 6.30  | 6.35  | 8.38  | 8.23  | 8.50   | 8.22  |
| Up   | ENSMUSG00000038077  | 1.45  | 7.40E-68 | Kcna6    | protein_coding | 8.82  | 8.67  | 8.44  | 8.45  | 10.11 | 10.05 | 10.03  | 9.97  |
| Down | ENSMUSG00000023927  | 1.29  | 8.64E-68 | Satb1    | protein_coding | 10.24 | 10.38 | 10.25 | 10.10 | 11.49 | 11.67 | 11.54  | 11.40 |
| Down | ENSMUSG00000026827  | -1.50 | 1.22E-67 | Gp2      | protein_coding | 9.70  | 9.76  | 9.71  | 9.72  | 8.29  | 8.08  | 8.37   | 8.20  |
| Down | ENSMUSG00000029448  | -2.68 | 1.54E-67 | Dab2b    | protein_coding | 9.70  | 9.68  | 9.42  | 9.38  | 9.42  | 9.63  | 9.76   | 9.68  |
| Up   | ENSMUSG000000096576 | 1.59  | 1.75E-67 | Dc3a3    | protein_coding | 9.00  | 9.00  | 8.86  | 8.90  | 10.64 | 10.58 | 10.48  | 10.38 |
| Up   | ENSMUSG00000041351  | 1.60  | 2.25E-67 | Rap1gap  | protein_coding | 9.57  | 9.42  | 9.37  | 9.09  | 9.96  | 11.03 | 11.05  | 10.78 |
| Up   | ENSMUSG00000066036  | 1.69  | 2.61E-67 | Ubr4     | protein_coding | 10.66 | 10.54 | 10.40 | 10.40 | 12.30 | 12.20 | 11.96  | 12.27 |
| Up   | ENSMUSG00000034403  | 1.11  | 3.87E-67 | Pja1     | protein_coding | 9.59  | 9.71  | 9.59  | 9.54  | 10.68 | 10.76 | 10.77  | 10.64 |
| Up   | ENSMUSG00000039419  | 1.41  | 2.48E-66 | Cntnap2  | protein_coding | 9.14  | 8.85  | 8.92  | 9.09  | 10.32 | 10.35 | 10.53  | 10.41 |
| Down | ENSMUSG00000015755  | -1.57 | 4.51E-66 | Tab2     | protein_coding | 9.55  | 9.49  | 9.72  | 9.60  | 8.15  | 7.90  | 7.81   | 8.25  |
| Up   | ENSMUSG00000068615  | 3.16  | 5.35E-66 | Gjd2     | protein_coding | 4.91  | 4.77  | 5.00  | 5.31  | 7.82  | 7.92  | 8.30   | 7.95  |
| Up   | ENSMUSG00000040276  | 1.25  | 5.99E-66 | Pacsin1  | protein_coding | 11.03 | 10.87 | 10.99 | 10.76 | 12.17 | 12.17 | 12.32  | 11.98 |
| Up   | ENSMUSG00000034958  | 1.24  | 7.27E-66 | Atcay    | protein_coding | 10.02 | 10.15 | 9.92  | 9.89  | 11.30 | 11.32 | 11.25  | 11.07 |
| Down | ENSMUSG00000052889  | -1.31 | 7.52E-66 | Prkcb    | protein_coding | 11.73 | 11.75 | 11.80 | 11.84 | 10.34 | 10.57 | 10.29  | 10.32 |
| Down | ENSMUSG00000060548  | -2.29 | 9.82E-66 | Tnfrsf19 | protein_coding | 7.95  | 8.05  | 7.94  | 7.80  | 5.81  | 5.32  | 5.58   | 6.12  |
| Up   | ENSMUSG00000029992  | 1.24  | 3.14E-65 | Gp1t     | protein_coding | 8.84  | 8.90  | 8.77  | 8.92  | 10.08 | 10.19 | 10.19  | 9.89  |
| Up   | ENSMUSG00000051022  | 1.79  | 5.58E-65 | Hs3st1   | protein_coding | 6.88  | 6.96  | 6.88  | 7.10  | 8.65  | 8.82  | 8.80</ |       |



|      |                     |       |          |               |                |       |       |       |       |       |       |       |       |
|------|---------------------|-------|----------|---------------|----------------|-------|-------|-------|-------|-------|-------|-------|-------|
| Up   | ENSMUSG00000004637  | 1.90  | 1.47E-64 | Wwox          | protein_coding | 6.86  | 7.05  | 6.94  | 6.93  | 8.89  | 8.63  | 8.96  | 8.75  |
| Up   | ENSMUSG000000030451 | 1.28  | 1.74E-64 | Herc2         | protein_coding | 10.65 | 10.58 | 10.55 | 10.49 | 11.84 | 11.89 | 11.71 | 11.92 |
| Down | ENSMUSG000000048458 | -3.65 | 1.92E-64 | Inka2         | protein_coding | 9.36  | 9.26  | 9.46  | 9.31  | 6.29  | 4.64  | 5.97  | 5.81  |
| Down | ENSMUSG000000038607 | -2.32 | 1.95E-64 | Gng10         | protein_coding | 7.77  | 7.74  | 7.84  | 7.01  | 7.99  | 5.79  | 5.61  | 5.39  |
| Down | ENSMUSG000000046215 | -3.06 | 3.58E-64 | Rprml         | protein_coding | 7.74  | 7.40  | 8.01  | 7.52  | 4.88  | 5.02  | 4.69  | 4.33  |
| Down | ENSMUSG000000043439 | -2.51 | 6.10E-64 | Eppp          | protein_coding | 8.53  | 8.24  | 8.39  | 8.06  | 5.54  | 6.22  | 5.60  | 6.07  |
| Up   | ENSMUSG000000059830 | 2.27  | 1.15E-63 | Vwv2          | protein_coding | 5.81  | 5.59  | 5.75  | 5.42  | 8.41  | 8.33  | 8.23  | 8.33  |
| Up   | ENSMUSG000000063626 | 2.04  | 1.42E-63 | Unc5d         | protein_coding | 7.81  | 8.10  | 7.98  | 7.98  | 8.46  | 9.92  | 10.25 | 10.15 |
| Up   | ENSMUSG000000058006 | 1.77  | 1.70E-63 | Mdn1          | protein_coding | 9.14  | 9.32  | 9.35  | 9.48  | 11.09 | 11.09 | 10.80 | 11.32 |
| Up   | ENSMUSG000000040724 | 1.15  | 1.96E-63 | Kcna2         | protein_coding | 11.11 | 11.09 | 10.95 | 10.93 | 12.23 | 12.17 | 12.28 | 12.00 |
| Up   | ENSMUSG000000027950 | 1.36  | 3.19E-63 | Chrb2         | protein_coding | 8.60  | 8.76  | 8.66  | 8.57  | 10.05 | 10.00 | 10.08 | 9.84  |
| Down | ENSMUSG000000026158 | -1.05 | 3.21E-63 | Ogfr1         | protein_coding | 10.91 | 10.95 | 10.88 | 10.90 | 9.84  | 9.85  | 9.95  | 9.83  |
| Down | ENSMUSG000000055675 | -1.31 | 4.61E-63 | Kbtbd11       | protein_coding | 10.40 | 10.31 | 10.42 | 10.23 | 8.99  | 9.21  | 8.87  | 9.06  |
| Up   | ENSMUSG000000034813 | 1.54  | 4.84E-63 | Grip1         | protein_coding | 7.78  | 7.62  | 7.64  | 7.58  | 9.15  | 9.26  | 9.22  | 9.05  |
| Up   | ENSMUSG000000033910 | 1.56  | 4.94E-63 | Gucy1a1       | protein_coding | 7.56  | 7.84  | 7.41  | 7.91  | 9.10  | 9.31  | 9.25  | 9.27  |
| Down | ENSMUSG000000039156 | -1.45 | 4.94E-63 | Stim2         | protein_coding | 9.76  | 9.82  | 9.67  | 9.61  | 8.50  | 8.13  | 8.12  | 8.32  |
| Down | ENSMUSG000000024608 | -1.69 | 5.13E-63 | Rps14         | protein_coding | 9.82  | 9.64  | 9.60  | 9.73  | 8.03  | 8.10  | 8.03  | 7.93  |
| Down | ENSMUSG000000020684 | -1.37 | 7.57E-63 | Ras10b        | protein_coding | 10.85 | 10.69 | 10.83 | 10.64 | 9.58  | 9.36  | 9.36  | 9.26  |
| Up   | ENSMUSG000000032172 | 1.87  | 9.97E-63 | Olfm2         | protein_coding | 7.80  | 7.80  | 7.69  | 7.81  | 9.63  | 9.58  | 9.55  | 9.51  |
| Up   | ENSMUSG000000021190 | 1.21  | 1.04E-62 | Lgmh          | protein_coding | 8.28  | 8.24  | 8.22  | 8.19  | 9.50  | 9.46  | 9.42  | 9.36  |
| Down | ENSMUSG000000028033 | -1.21 | 1.59E-62 | Kcnc5         | protein_coding | 9.13  | 9.24  | 9.28  | 9.06  | 7.89  | 7.91  | 8.03  | 8.07  |
| Down | ENSMUSG000000009406 | -1.78 | 1.92E-62 | Elk1          | protein_coding | 9.35  | 9.34  | 9.30  | 9.10  | 7.39  | 7.51  | 7.67  | 7.49  |
| Up   | ENSMUSG000000051343 | 1.44  | 2.24E-62 | Rab11fp5      | protein_coding | 8.88  | 8.89  | 8.92  | 8.71  | 10.32 | 10.35 | 10.31 | 10.13 |
| Down | ENSMUSG000000037362 | -3.49 | 2.38E-62 | Ccn3          | protein_coding | 9.42  | 9.46  | 9.29  | 9.51  | 5.90  | 6.13  | 6.30  | 5.66  |
| Down | ENSMUSG000000000861 | -1.41 | 2.74E-62 | Bcl11a        | protein_coding | 9.92  | 9.93  | 9.86  | 9.82  | 8.63  | 8.64  | 8.12  | 8.48  |
| Up   | ENSMUSG000000024587 | 1.16  | 2.90E-62 | Nars          | protein_coding | 9.39  | 9.44  | 9.46  | 9.38  | 10.59 | 10.58 | 10.70 | 10.42 |
| Up   | ENSMUSG000000025968 | 1.33  | 1.32E-61 | Ndufs1        | protein_coding | 8.87  | 8.89  | 8.92  | 8.97  | 10.32 | 10.29 | 10.23 | 10.11 |
| Up   | ENSMUSG000000039652 | 1.18  | 1.39E-61 | Cpeb3         | protein_coding | 9.37  | 9.41  | 9.32  | 9.24  | 10.59 | 10.48 | 10.64 | 10.33 |
| Down | ENSMUSG000000051339 | -1.98 | 4.10E-61 | 2900026A02Rik | protein_coding | 9.62  | 9.29  | 9.45  | 9.03  | 7.75  | 7.10  | 7.28  | 7.42  |
| Down | ENSMUSG000000037126 | -1.72 | 5.42E-61 | Psd           | protein_coding | 11.41 | 11.22 | 11.36 | 11.20 | 9.59  | 9.74  | 9.29  | 9.67  |
| Down | ENSMUSG000000000740 | -1.53 | 5.60E-61 | Rpl13         | protein_coding | 10.64 | 10.44 | 10.56 | 10.61 | 9.06  | 8.96  | 9.13  | 9.01  |
| Down | ENSMUSG000000092345 | -1.95 | 6.92E-61 | Gm20503       | protein_coding | 7.76  | 7.78  | 7.93  | 7.93  | 5.90  | 6.03  | 5.97  | 5.98  |
| Down | ENSMUSG000000022926 | -1.50 | 1.04E-60 | Camkv         | protein_coding | 11.29 | 11.27 | 11.23 | 11.16 | 9.69  | 9.67  | 9.93  | 9.46  |
| Down | ENSMUSG000000074505 | -1.19 | 1.17E-60 | Fat2          | protein_coding | 11.22 | 11.22 | 11.22 | 11.04 | 9.89  | 10.02 | 10.11 | 9.87  |
| Down | ENSMUSG000000024873 | -1.59 | 1.62E-60 | Cnih2         | protein_coding | 11.09 | 10.88 | 11.03 | 10.77 | 9.35  | 9.53  | 9.16  | 9.39  |
| Up   | ENSMUSG000000005583 | 1.47  | 1.70E-60 | Mef2c         | protein_coding | 10.14 | 10.41 | 10.03 | 10.34 | 11.72 | 11.76 | 11.70 | 11.64 |
| Down | ENSMUSG000000062151 | -1.75 | 2.01E-60 | Unc13c        | protein_coding | 8.36  | 8.53  | 8.51  | 8.69  | 6.53  | 6.92  | 7.06  | 6.71  |
| Up   | ENSMUSG000000060240 | 1.68  | 2.41E-60 | Cend1         | protein_coding | 10.14 | 10.12 | 10.17 | 10.07 | 11.73 | 11.84 | 11.93 | 11.69 |
| Down | ENSMUSG000000045733 | -1.39 | 3.61E-60 | Sprm          | protein_coding | 10.00 | 10.05 | 10.15 | 10.06 | 8.63  | 8.74  | 8.69  | 8.69  |
| Down | ENSMUSG000000059852 | -2.69 | 4.88E-60 | Keng2         | protein_coding | 7.34  | 7.39  | 7.58  | 7.26  | 4.95  | 5.07  | 4.40  | 5.26  |
| Up   | ENSMUSG000000019210 | 1.10  | 5.90E-60 | Atp6v1e1      | protein_coding | 9.94  | 9.80  | 9.93  | 9.97  | 11.13 | 10.96 | 11.10 | 10.84 |
| Down | ENSMUSG000000037541 | -1.23 | 6.88E-60 | Shank2        | protein_coding | 10.76 | 10.60 | 10.65 | 10.55 | 9.53  | 9.37  | 9.39  | 9.32  |
| Down | ENSMUSG000000023886 | -2.96 | 7.22E-60 | Smoc2         | protein_coding | 6.97  | 6.95  | 7.09  | 7.02  | 4.28  | 4.37  | 3.71  | 4.74  |
| Down | ENSMUSG000000000296 | -2.26 | 7.81E-60 | Tpd521l       | protein_coding | 7.54  | 7.55  | 7.39  | 7.63  | 5.50  | 5.51  | 5.05  | 5.43  |
| Down | ENSMUSG000000041577 | -3.41 | 8.00E-60 | Prep          | protein_coding | 8.09  | 7.82  | 7.21  | 8.02  | 4.47  | 4.60  | 4.22  | 5.17  |
| Down | ENSMUSG000000026234 | -1.62 | 9.16E-60 | Rps20         | protein_coding | 9.70  | 9.71  | 9.61  | 9.73  | 8.21  | 8.09  | 7.99  | 8.03  |
| Down | ENSMUSG000000022132 | -3.11 | 1.19E-59 | Cldn10        | protein_coding | 7.02  | 7.01  | 7.06  | 6.99  | 4.31  | 4.48  | 3.67  | 4.25  |
| Down | ENSMUSG000000059784 | -1.43 | 1.25E-59 | Gm25602       | protein_coding | 8.53  | 8.55  | 8.57  | 8.46  | 7.27  | 7.06  | 7.15  | 7.00  |
| Down | ENSMUSG000000063015 | -1.16 | 1.99E-59 | Ccni          | protein_coding | 10.89 | 10.82 | 10.77 | 10.76 | 9.51  | 9.82  | 9.68  | 9.56  |
| Up   | ENSMUSG000000026305 | 1.16  | 2.67E-59 | Lrrfip1       | protein_coding | 8.51  | 8.63  | 8.62  | 8.47  | 9.78  | 9.71  | 9.79  | 9.56  |
| Up   | ENSMUSG000000012770 | 1.52  | 3.08E-59 | Ckb           | protein_coding | 11.05 | 10.92 | 11.00 | 10.77 | 12.51 | 12.38 | 12.57 | 12.36 |
| Up   | ENSMUSG000000026825 | 1.25  | 3.61E-59 | Dnm1          | protein_coding | 12.46 | 12.43 | 12.41 | 12.18 | 13.57 | 13.69 | 13.75 | 13.47 |
| Up   | ENSMUSG000000027859 | 3.62  | 4.02E-59 | Ngf           | protein_coding | 4.51  | 4.37  | 4.47  | 4.60  | 7.92  | 8.05  | 7.55  | 7.50  |
| Up   | ENSMUSG000000020949 | 1.01  | 4.11E-59 | Fkbp3         | protein_coding | 9.31  | 9.46  | 9.45  | 9.47  | 10.33 | 10.52 | 10.48 | 10.39 |
| Down | ENSMUSG000000032418 | -1.92 | 4.97E-59 | Me1           | protein_coding | 8.65  | 8.72  | 8.61  | 8.70  | 6.72  | 7.19  | 6.38  | 6.76  |
| Down | ENSMUSG000000045318 | -1.87 | 5.57E-59 | Adra2c        | protein_coding | 7.10  | 7.02  | 7.09  | 7.02  | 5.23  | 5.34  | 5.35  | 5.25  |
| Up   | ENSMUSG000000024990 | 3.29  | 1.13E-58 | Rbp4          | protein_coding | 5.21  | 5.44  | 4.68  | 5.20  | 8.23  | 8.14  | 8.71  | 8.11  |
| Up   | ENSMUSG000000038453 | 1.03  | 1.19E-58 | Scrn1         | protein_coding | 10.82 | 10.78 | 10.79 | 10.74 | 11.86 | 11.78 | 11.88 | 11.72 |
| Up   | ENSMUSG000000046385 | 1.76  | 1.27E-58 | Scrl1         | protein_coding | 9.65  | 9.43  | 9.50  | 9.24  | 11.24 | 11.24 | 11.43 | 10.93 |
| Up   | ENSMUSG000000039057 | 2.33  | 1.41E-58 | Mlyo16        | protein_coding | 7.77  | 7.72  | 7.69  | 7.76  | 9.87  | 10.09 | 10.23 | 9.95  |
| Up   | ENSMUSG000000024063 | 1.94  | 1.51E-58 | Lbh           | protein_coding | 7.94  | 8.01  | 7.94  | 7.76  | 9.96  | 9.85  | 9.98  | 9.53  |
| Up   | ENSMUSG000000037487 | 1.23  | 2.16E-58 | Ubr5          | protein_coding | 10.03 | 10.07 | 9.86  | 9.98  | 11.35 | 11.09 | 11.22 | 11.18 |
| Down | ENSMUSG000000040125 | -1.81 | 2.36E-58 | Gpr26         | protein_coding | 10.54 | 10.69 | 10.50 | 10.40 | 8.40  | 9.07  | 8.49  | 8.89  |
| Down | ENSMUSG000000025651 | -1.44 | 3.40E-58 | Uqcr1         | protein_coding | 9.36  | 9.32  | 9.45  | 9.36  | 10.76 | 10.76 | 10.93 | 10.66 |
| Down | ENSMUSG000000022656 | -1.84 | 3.40E-58 | Nectin3       | protein_coding | 7.98  | 8.37  | 8.29  | 8.22  | 6.43  | 6.41  | 6.20  | 6.65  |
| Down | ENSMUSG000000020950 | -1.35 | 3.58E-58 | Foxg1         | protein_coding | 10.03 | 10.09 | 10.02 | 9.90  | 8.86  | 8.88  | 8.41  | 8.77  |
| Down | ENSMUSG000000000567 | -2.85 | 4.46E-58 | Sox9          | protein_coding | 8.36  | 8.37  | 8.13  | 8.54  | 5.65  | 5.13  | 5.08  | 6.26  |
| Down | ENSMUSG000000031605 | -1.47 | 5.17E-58 | Klh2          | protein_coding | 11.12 | 11.07 | 11.02 | 10.93 | 9.70  | 9.42  | 9.38  | 9.75  |
| Up   | ENSMUSG000000022477 | 1.01  | 5.98E-58 | Aco2          | protein_coding | 10.55 | 10.42 | 10.51 | 10.31 | 11.46 | 11.48 | 11.57 | 11.32 |
| Up   | ENSMUSG000000032279 | 1.24  | 9.74E-58 | ldh3a         | protein_coding | 10.22 | 10.20 | 10.22 | 10.10 | 11.47 | 11.47 | 11.44 | 11.31 |
| Down | ENSMUSG000000038807 | -1.18 | 1.26E-57 | Rap1gap2      | protein_coding | 10.01 | 9.92  | 9.89  | 9.87  | 8.76  | 8.68  | 8.76  | 8.70  |
| Down | ENSMUSG000000041453 | -1.04 | 1.27E-57 | Rpl21         | protein_coding | 11.38 | 11.34 | 11.32 | 11.39 | 10.31 | 10.39 | 10.30 | 10.30 |
| Down | ENSMUSG000000031761 | -2.81 | 1.41E-57 | Smc           | protein_coding | 7.51  | 7.51  | 7.02  | 7.36  | 4.83  | 4.84  | 4.45  | 4.95  |
| Down | ENSMUSG000000044161 | -1.61 | 1.41E-57 | Foxo1         | protein_coding | 8.21  | 8.09  | 8.07  | 8.04  | 6.43  | 6.20  | 6.64  | 6.62  |
| Down | ENSMUSG000000006476 | -1.41 | 1.56E-57 | Nsmf          | protein_coding | 11.89 | 11.68 | 11.84 | 11.56 | 10.37 | 10.50 | 10.28 | 10.17 |
| Up   | ENSMUSG000000036815 | 1.76  | 1.62E-57 | Dpp10         | protein_coding | 8.55  | 8.72  | 8.48  | 9.02  | 10.20 | 10.61 | 10.48 | 10.52 |
| Down | ENSMUSG000000044164 | -3.04 | 1.82E-57 | Rnf182        | protein_coding | 7.33  | 7.35  | 7.24  | 7.24  | 4.47  | 4.42  | 4.47  | 4.66  |
| Up   | ENSMUSG000000020664 | 1.11  | 3.06E-57 | Dld           | protein_coding | 8.90  | 8.95  | 8.98  | 8.98  | 10.02 | 10.10 | 10.20 | 9.87  |
| Down | ENSMUSG000000030428 | -1.52 | 4.23E-57 | Ttyh1         | protein_coding | 11.21 | 11.07 | 11.06 | 11.02 | 9.84  | 9.52  | 9.35  | 9.53  |
| Down | ENSMUSG000000047215 | -1.19 | 5.26E-57 | Rpl9          | protein_coding | 10.14 | 10.09 | 9.97  | 10.07 | 8.86  | 8.89  | 8.96  | 8.84  |
| Up   | ENSMUSG000000102697 | 1.51  | 5.51E-57 | Pcdhac2       | protein_coding | 9.61  | 9.44  | 9.49  | 9.27  | 10.91 | 11.08 | 10.96 | 10.77 |
| Up   | ENSMUSG000000025266 | 1.12  | 7.07E-57 | Gnl3l         | protein_coding | 10.00 | 10.24 | 9.99  | 10.21 | 11.12 | 11.26 | 11.29 | 11.26 |
| Up   | ENSMUSG000000020456 | 1.10  | 8.81E-57 | Ogdh          | protein_coding | 10.12 | 9.97  | 10.00 | 9.93  | 11.03 | 11.17 | 11.22 | 10.97 |
| Down | ENSMUSG000000038400 | -1.75 | 1.25E-56 | Pmepa1        | protein_coding | 8.10  | 8.04  | 8.02  | 8.17  | 6.20  | 6.14  | 6.33  | 6.76  |
| Down | ENSMUSG000000032773 | -1.41 | 1.28E-56 | Chrm1         | protein_coding | 10.46 | 10.30 | 10.40 | 10.18 | 9.12  | 8.90  | 8.91  | 8.77  |
| Up   | ENSMUSG000000062785 | 1.42  | 1.64E    |               |                |       |       |       |       |       |       |       |       |

|      |                      |       |          |               |                |       |       |       |       |       |       |       |       |
|------|----------------------|-------|----------|---------------|----------------|-------|-------|-------|-------|-------|-------|-------|-------|
| Up   | ENSMUSG00000041020   | 1.26  | 2.66E-56 | Map7d2        | protein_coding | 10.57 | 10.42 | 10.47 | 10.28 | 11.77 | 11.64 | 11.83 | 11.54 |
| Up   | ENSMUSG00000005716   | 3.68  | 2.95E-56 | Pvalb         | protein_coding | 7.83  | 7.67  | 7.83  | 7.31  | 11.38 | 11.46 | 11.46 | 10.95 |
| Up   | ENSMUSG00000015981   | 1.36  | 4.47E-56 | Sik32c        | protein_coding | 8.85  | 8.91  | 9.07  | 8.87  | 10.29 | 10.38 | 10.37 | 10.07 |
| Down | ENSMUSG000000038538  | -1.06 | 7.08E-56 | Ubn2          | protein_coding | 10.08 | 10.13 | 10.12 | 10.15 | 9.12  | 8.81  | 9.10  | 9.20  |
| Up   | ENSMUSG000000032238  | 1.30  | 7.23E-56 | Rora          | protein_coding | 9.01  | 9.01  | 9.15  | 9.25  | 10.27 | 10.42 | 10.63 | 10.26 |
| Up   | ENSMUSG000000062070  | 1.17  | 1.03E-55 | Pgk1          | protein_coding | 9.24  | 9.24  | 9.40  | 9.21  | 10.35 | 10.47 | 10.60 | 10.33 |
| Up   | ENSMUSG000000021288  | 1.00  | 1.12E-55 | Klf1          | protein_coding | 11.78 | 11.72 | 11.22 | 11.65 | 12.73 | 12.71 | 12.58 | 12.58 |
| Down | ENSMUSG000000027210  | -3.17 | 2.04E-55 | Meis2         | protein_coding | 9.14  | 9.21  | 9.05  | 9.26  | 5.40  | 6.26  | 6.16  | 6.31  |
| Up   | ENSMUSG000000020917  | 1.28  | 2.07E-55 | Acly          | protein_coding | 8.74  | 8.86  | 8.73  | 8.84  | 10.09 | 9.93  | 10.22 | 10.00 |
| Down | ENSMUSG000000034818  | -1.41 | 2.34E-55 | Celf5         | protein_coding | 10.85 | 10.93 | 11.05 | 10.91 | 9.50  | 9.67  | 9.38  | 9.56  |
| Down | ENSMUSG000000003352  | -1.03 | 3.06E-55 | Cacnb3        | protein_coding | 10.37 | 10.35 | 10.38 | 10.31 | 9.30  | 9.38  | 9.29  | 9.32  |
| Up   | ENSMUSG000000039384  | 2.39  | 3.31E-55 | Dusp10        | protein_coding | 5.82  | 5.93  | 5.59  | 5.38  | 8.14  | 8.10  | 8.02  | 7.66  |
| Down | ENSMUSG000000036760  | -2.10 | 4.06E-55 | Kenk9         | protein_coding | 8.55  | 8.42  | 8.70  | 8.53  | 6.12  | 6.17  | 6.41  | 7.07  |
| Down | ENSMUSG000000026678  | -3.29 | 4.12E-55 | Rgs5          | protein_coding | 7.90  | 7.92  | 7.88  | 7.82  | 4.42  | 4.04  | 4.95  | 5.38  |
| Up   | ENSMUSG000000042671  | 1.41  | 7.21E-55 | Rgs8          | protein_coding | 9.39  | 9.25  | 9.39  | 9.12  | 10.70 | 10.70 | 10.92 | 10.43 |
| Up   | ENSMUSG000000070287  | 2.08  | 7.75E-55 | Slc35g2       | protein_coding | 6.10  | 5.96  | 6.02  | 5.88  | 7.96  | 8.02  | 8.11  | 7.88  |
| Up   | ENSMUSG000000031529  | 1.54  | 9.16E-55 | Tnks          | protein_coding | 9.69  | 9.62  | 9.59  | 9.57  | 11.11 | 11.34 | 11.10 | 11.04 |
| Up   | ENSMUSG000000036622  | 1.48  | 1.10E-54 | Atp13a2       | protein_coding | 9.19  | 9.04  | 9.15  | 9.09  | 10.65 | 10.54 | 10.70 | 10.45 |
| Down | ENSMUSG000000058193  | -2.44 | 1.19E-54 | Gstm1         | protein_coding | 9.75  | 9.73  | 9.49  | 9.47  | 7.33  | 7.70  | 6.43  | 7.09  |
| Down | ENSMUSG000000015771  | -2.20 | 1.26E-54 | Selenow       | protein_coding | 12.04 | 11.93 | 12.09 | 11.94 | 9.86  | 9.90  | 9.84  | 9.61  |
| Up   | ENSMUSG000000037419  | 1.52  | 1.50E-54 | Endod1        | protein_coding | 9.66  | 9.54  | 9.40  | 9.47  | 11.18 | 10.93 | 11.16 | 10.86 |
| Up   | ENSMUSG000000072966  | 1.44  | 1.50E-54 | Gprasp2       | protein_coding | 8.50  | 8.54  | 8.25  | 8.33  | 9.92  | 9.82  | 9.99  | 9.61  |
| Down | ENSMUSG000000045608  | -3.58 | 1.74E-54 | Dbx2          | protein_coding | 6.53  | 6.85  | 6.81  | 6.74  | 2.57  | 3.69  | 4.16  | 3.64  |
| Up   | ENSMUSG000000037426  | 1.21  | 1.81E-54 | Depdc5        | protein_coding | 8.67  | 8.71  | 8.62  | 8.48  | 9.81  | 9.71  | 9.99  | 9.75  |
| Up   | ENSMUSG000000011752  | 1.22  | 2.90E-54 | Pgam1         | protein_coding | 8.98  | 8.80  | 8.95  | 8.78  | 10.03 | 10.08 | 10.23 | 10.02 |
| Up   | ENSMUSG000000020524  | 1.09  | 3.64E-54 | Gria1         | protein_coding | 12.75 | 12.60 | 12.73 | 12.54 | 13.75 | 13.79 | 13.80 | 13.62 |
| Down | ENSMUSG000000027419  | -1.27 | 3.65E-54 | Pcsk2         | protein_coding | 9.99  | 9.99  | 9.87  | 9.85  | 8.57  | 8.77  | 8.55  | 8.77  |
| Down | ENSMUSG000000007682  | -3.80 | 5.10E-54 | Dio2          | protein_coding | 8.95  | 8.95  | 9.05  | 8.90  | 5.67  | 4.68  | 4.61  | 5.85  |
| Down | ENSMUSG000000047409  | -1.73 | 5.40E-54 | Ctdspl        | protein_coding | 7.71  | 7.65  | 7.86  | 7.76  | 5.90  | 5.89  | 6.25  | 6.23  |
| Up   | ENSMUSG000000020189  | 1.05  | 6.27E-54 | Ospl8         | protein_coding | 9.32  | 9.46  | 9.35  | 9.52  | 10.35 | 10.57 | 10.50 | 10.39 |
| Up   | ENSMUSG000000042105  | 1.02  | 6.31E-54 | Inpp5f        | protein_coding | 9.49  | 9.55  | 9.63  | 9.61  | 10.58 | 10.55 | 10.74 | 10.49 |
| Down | ENSMUSG000000090733  | -2.11 | 9.14E-54 | Rps27         | protein_coding | 9.48  | 9.34  | 9.33  | 9.59  | 7.53  | 7.47  | 6.94  | 7.43  |
| Up   | ENSMUSG000000018665  | 1.75  | 1.26E-53 | Pngp          | protein_coding | 6.78  | 6.98  | 7.19  | 6.73  | 9.82  | 8.65  | 8.73  | 8.85  |
| Up   | ENSMUSG000000019113  | 1.62  | 1.50E-53 | Onghl         | protein_coding | 8.59  | 8.59  | 8.41  | 8.08  | 9.93  | 9.76  | 10.05 | 10.11 |
| Up   | ENSMUSG000000026748  | 1.19  | 1.56E-53 | Pfkfb2        | protein_coding | 8.34  | 8.48  | 8.34  | 8.62  | 9.71  | 9.69  | 9.55  | 9.56  |
| Up   | ENSMUSG000000027963  | 1.32  | 2.44E-53 | Extl2         | protein_coding | 8.56  | 8.51  | 8.44  | 8.52  | 9.76  | 10.00 | 9.87  | 9.63  |
| Up   | ENSMUSG000000047959  | 2.19  | 2.66E-53 | Kcna3         | protein_coding | 6.06  | 6.09  | 6.39  | 6.23  | 8.47  | 8.34  | 8.24  | 8.24  |
| Up   | ENSMUSG000000041263  | 1.42  | 3.01E-53 | Rusc1         | protein_coding | 8.67  | 8.54  | 8.53  | 8.34  | 9.80  | 9.99  | 10.11 | 9.84  |
| Up   | ENSMUSG000000018865  | 1.10  | 4.46E-53 | Sult4a1       | protein_coding | 10.48 | 10.44 | 10.62 | 10.35 | 11.52 | 11.57 | 11.74 | 11.45 |
| Down | ENSMUSG0000000033676 | -1.21 | 4.68E-53 | Gabbr3        | protein_coding | 11.25 | 11.35 | 11.31 | 11.40 | 9.89  | 10.19 | 10.16 | 10.22 |
| Down | ENSMUSG000000030605  | -2.63 | 4.96E-53 | Mlge8         | protein_coding | 8.74  | 8.59  | 8.55  | 8.59  | 6.14  | 6.17  | 5.61  | 6.26  |
| Down | ENSMUSG000000026112  | -1.30 | 5.92E-53 | Coa5          | protein_coding | 9.40  | 9.40  | 9.30  | 9.39  | 8.02  | 8.26  | 8.03  | 8.03  |
| Down | ENSMUSG0000000068037 | -3.17 | 6.86E-53 | Mas1          | protein_coding | 7.18  | 6.87  | 6.98  | 7.04  | 3.35  | 4.44  | 4.45  | 4.17  |
| Down | ENSMUSG000000026941  | -2.64 | 7.20E-53 | Fibcd1        | protein_coding | 8.85  | 8.70  | 8.72  | 8.50  | 5.33  | 6.19  | 6.48  | 6.28  |
| Up   | ENSMUSG000000025192  | 1.44  | 1.12E-52 | Entpd7        | protein_coding | 7.21  | 7.19  | 7.19  | 7.30  | 7.18  | 8.75  | 8.59  | 8.40  |
| Up   | ENSMUSG000000040811  | 1.56  | 1.19E-52 | Emi2          | protein_coding | 8.92  | 8.90  | 9.21  | 9.05  | 10.55 | 10.42 | 10.74 | 10.57 |
| Down | ENSMUSG000000022423  | -1.13 | 1.20E-52 | Impact        | protein_coding | 10.24 | 10.36 | 10.15 | 10.31 | 11.22 | 11.51 | 11.46 | 11.39 |
| Up   | ENSMUSG0000000042687 | 1.13  | 1.41E-52 | Eno2          | protein_coding | 11.29 | 11.17 | 11.20 | 11.14 | 12.35 | 12.45 | 12.35 | 12.17 |
| Down | ENSMUSG000000016494  | -3.15 | 1.59E-52 | Cd34          | protein_coding | 7.44  | 7.58  | 7.22  | 7.14  | 3.73  | 4.51  | 4.59  | 4.77  |
| Up   | ENSMUSG000000036026  | 1.04  | 1.64E-52 | Tmem63b       | protein_coding | 8.82  | 8.87  | 8.88  | 8.85  | 9.95  | 9.89  | 9.96  | 9.75  |
| Up   | ENSMUSG000000022415  | 1.22  | 1.73E-52 | Syng1         | protein_coding | 10.98 | 11.04 | 11.02 | 10.88 | 12.21 | 12.12 | 12.40 | 12.03 |
| Down | ENSMUSG000000003273  | -1.09 | 1.73E-52 | Car11         | protein_coding | 8.54  | 8.57  | 8.53  | 8.52  | 7.48  | 7.45  | 7.40  | 7.54  |
| Up   | ENSMUSG000000045246  | 3.46  | 1.78E-52 | Keng4         | protein_coding | 5.42  | 4.97  | 5.00  | 4.87  | 8.66  | 8.32  | 8.50  | 7.91  |
| Down | ENSMUSG000000056367  | -1.26 | 1.93E-52 | Actr3b        | protein_coding | 9.46  | 9.45  | 9.64  | 9.33  | 8.16  | 8.31  | 8.33  | 8.10  |
| Down | ENSMUSG000000038175  | -2.50 | 1.99E-52 | Myliip        | protein_coding | 7.12  | 7.44  | 7.59  | 7.32  | 5.19  | 5.08  | 4.61  | 5.15  |
| Down | ENSMUSG000000008575  | -1.33 | 2.44E-52 | Nfib          | protein_coding | 10.89 | 10.86 | 10.87 | 10.88 | 9.41  | 9.59  | 9.56  | 9.62  |
| Up   | ENSMUSG000000032220  | 1.77  | 4.16E-52 | Myo1e         | protein_coding | 6.49  | 6.54  | 6.59  | 6.35  | 8.35  | 8.12  | 8.32  | 8.06  |
| Down | ENSMUSG000000061731  | -1.31 | 4.65E-52 | Ext1          | protein_coding | 8.12  | 8.45  | 8.30  | 8.30  | 6.90  | 7.14  | 7.05  | 7.03  |
| Up   | ENSMUSG000000053965  | 1.66  | 4.73E-52 | Pde5a         | protein_coding | 7.17  | 7.38  | 7.17  | 7.16  | 8.94  | 8.62  | 9.02  | 8.80  |
| Up   | ENSMUSG000000075410  | 2.57  | 6.91E-52 | Prcd          | protein_coding | 6.26  | 6.14  | 6.14  | 5.82  | 6.11  | 8.62  | 8.61  | 8.42  |
| Up   | ENSMUSG000000021983  | 1.10  | 7.24E-52 | Atp9a2        | protein_coding | 8.96  | 9.06  | 8.88  | 8.88  | 9.01  | 10.11 | 10.16 | 10.05 |
| Down | ENSMUSG000000044067  | -1.40 | 7.97E-52 | Gpr22         | protein_coding | 9.76  | 9.95  | 9.98  | 9.78  | 8.23  | 8.45  | 8.59  | 8.61  |
| Up   | ENSMUSG000000041658  | 1.38  | 8.11E-52 | Rragb         | protein_coding | 8.35  | 8.33  | 8.25  | 8.32  | 9.52  | 9.84  | 9.77  | 9.58  |
| Up   | ENSMUSG000000023032  | 1.23  | 8.31E-52 | Slc4a8        | protein_coding | 9.29  | 9.28  | 9.28  | 9.20  | 10.54 | 10.59 | 10.66 | 10.25 |
| Down | ENSMUSG000000009402  | -2.27 | 8.89E-52 | Slc25a18      | protein_coding | 7.65  | 7.61  | 7.89  | 7.73  | 5.56  | 5.45  | 5.36  | 5.80  |
| Up   | ENSMUSG000000061046  | 1.58  | 9.44E-52 | Haghl         | protein_coding | 7.42  | 7.62  | 7.76  | 7.49  | 9.04  | 9.15  | 9.33  | 8.99  |
| Down | ENSMUSG000000031765  | -2.77 | 1.01E-51 | Mt1           | protein_coding | 10.67 | 10.67 | 10.47 | 10.52 | 7.81  | 8.17  | 7.37  | 7.89  |
| Down | ENSMUSG000000026424  | -2.67 | 1.05E-51 | Gpr371i       | protein_coding | 8.57  | 8.57  | 8.33  | 8.31  | 6.45  | 5.48  | 5.17  | 6.05  |
| Down | ENSMUSG000000017390  | -1.60 | 2.05E-51 | Aldoc         | protein_coding | 11.36 | 11.30 | 11.11 | 11.14 | 9.52  | 9.53  | 9.82  | 9.47  |
| Down | ENSMUSG000000022490  | -1.43 | 2.18E-51 | Ppp1r1a       | protein_coding | 9.08  | 9.01  | 9.30  | 9.01  | 7.78  | 7.66  | 7.86  | 7.40  |
| Up   | ENSMUSG000000017721  | 1.17  | 2.19E-51 | Pigt          | protein_coding | 8.42  | 8.39  | 8.48  | 8.38  | 9.62  | 9.42  | 9.73  | 9.50  |
| Down | ENSMUSG000000026090  | -2.23 | 2.34E-51 | 2010300C02Rik | protein_coding | 11.37 | 11.20 | 11.53 | 11.05 | 8.46  | 9.45  | 8.86  | 9.33  |
| Up   | ENSMUSG000000013593  | 1.44  | 2.49E-51 | Ndufs2        | protein_coding | 9.62  | 9.58  | 9.49  | 9.58  | 10.91 | 10.99 | 11.12 | 10.88 |
| Down | ENSMUSG000000063867  | -1.12 | 3.38E-51 | Nlgn1         | protein_coding | 9.68  | 9.70  | 8.63  | 8.67  | 8.46  | 8.54  | 8.63  | 8.60  |
| Up   | ENSMUSG000000031227  | 1.28  | 3.47E-51 | Magee1        | protein_coding | 8.81  | 8.84  | 8.76  | 8.67  | 10.03 | 10.11 | 10.05 | 9.97  |
| Down | ENSMUSG000000036578  | -1.94 | 4.16E-51 | Fxyd7         | protein_coding | 7.87  | 7.81  | 7.71  | 7.92  | 5.89  | 6.19  | 5.86  | 5.87  |
| Down | ENSMUSG000000028351  | -1.13 | 5.11E-51 | Bnnp1         | protein_coding | 10.69 | 10.49 | 10.65 | 10.33 | 9.43  | 9.49  | 9.48  | 9.26  |
| Down | ENSMUSG000000025422  | -1.18 | 5.40E-51 | Agap2         | protein_coding | 12.98 | 12.89 | 12.97 | 12.80 | 11.67 | 11.91 | 11.57 | 11.76 |
| Down | ENSMUSG000000034892  | -2.09 | 5.57E-51 | Rps29         | protein_coding | 10.18 | 10.24 | 10.15 | 10.44 | 8.11  | 8.42  | 8.23  | 7.93  |
| Up   | ENSMUSG000000022629  | 1.06  | 8.91E-51 | Kif21a        | protein_coding | 10.85 | 10.60 | 10.65 | 10.61 | 11.80 | 11.70 | 11.75 | 11.69 |
| Down | ENSMUSG000000055320  | -1.93 | 1.01E-50 | Tead1         | protein_coding | 8.19  | 8.11  | 8.09  | 8.32  | 5.86  | 6.48  | 6.35  | 6.59  |
| Down | ENSMUSG000000041120  | -2.57 | 1.05E-50 | Nbl1          | protein_coding | 8.12  | 8.13  | 8.56  | 7.96  | 5.71  | 6.07  | 5.24  | 5.80  |
| Down | ENSMUSG000000024621  | -1.56 | 1.10E-50 | Csf1r         | protein_coding | 7.96  | 7.87  | 7.98  | 7.80  | 6.43  | 6.43  | 6.59  | 6.06  |
| Down | ENSMUSG000000029212  | -1.60 | 1.13E-50 | Gabbr1        | protein_coding | 10.85 | 10.73 | 10.76 | 10.80 | 8.97  | 9.43  | 8.91  | 9.39  |
| Up   | ENSMUSG000000022442  | 1.42  | 1.39E-50 | Tll1          | protein_coding | 7.61  | 7.74  | 7.71  | 7.74  | 9.13  | 9.19  | 9.06  | 9.06  |
| Up   | ENSMUSG000000030870  | 1.22  | 2.29E-50 | Ubf1d         | protein_coding | 8.71  | 8.53  | 8.    |       |       |       |       |       |

|      |                     |       |          |           |                |       |       |       |       |       |       |       |       |
|------|---------------------|-------|----------|-----------|----------------|-------|-------|-------|-------|-------|-------|-------|-------|
| Down | ENSMUSG00000030500  | -2.62 | 7.38E-50 | Slc17a6   | protein_coding | 7.09  | 7.28  | 7.07  | 7.26  | 4.36  | 4.97  | 4.85  | 4.74  |
| Down | ENSMUSG00000074575  | -2.94 | 8.31E-50 | Kcng1     | protein_coding | 8.28  | 8.21  | 8.04  | 8.44  | 4.66  | 5.81  | 4.97  | 5.90  |
| Up   | ENSMUSG00000039889  | 1.17  | 9.05E-50 | Cbx4      | protein_coding | 8.06  | 8.19  | 8.26  | 8.15  | 9.28  | 9.28  | 9.30  | 9.26  |
| Down | ENSMUSG000000038020 | -1.06 | 9.12E-50 | Rapgef1   | protein_coding | 10.14 | 10.10 | 10.11 | 9.98  | 9.07  | 9.14  | 8.87  | 9.01  |
| Up   | ENSMUSG00000005981  | 1.28  | 9.83E-50 | Trap1     | protein_coding | 7.80  | 7.89  | 7.84  | 7.92  | 9.17  | 9.08  | 9.17  | 9.10  |
| Up   | ENSMUSG00000006218  | 3.49  | 1.24E-49 | Fam131c   | protein_coding | 4.29  | 4.13  | 3.84  | 4.28  | 7.41  | 7.31  | 7.34  | 7.13  |
| Down | ENSMUSG00000004568  | -1.95 | 1.44E-49 | Nhrp2     | protein_coding | 11.07 | 11.06 | 10.76 | 9.17  | 10.78 | 9.17  | 9.11  | 8.94  |
| Down | ENSMUSG00000052534  | -1.28 | 1.78E-49 | Pbx1      | protein_coding | 10.42 | 10.51 | 10.23 | 10.40 | 9.09  | 8.95  | 9.25  | 9.25  |
| Down | ENSMUSG00000040836  | -1.81 | 1.96E-49 | Gpr161    | protein_coding | 9.59  | 9.41  | 9.44  | 9.18  | 7.66  | 7.63  | 7.52  | 7.69  |
| Down | ENSMUSG00000020733  | -2.67 | 2.34E-49 | Slc9a3r1  | protein_coding | 8.05  | 7.94  | 7.96  | 7.78  | 5.85  | 5.72  | 4.87  | 4.85  |
| Up   | ENSMUSG00000002900  | 1.28  | 2.45E-49 | Lamb1     | protein_coding | 7.54  | 7.58  | 7.61  | 7.71  | 8.91  | 8.87  | 8.92  | 8.79  |
| Up   | ENSMUSG00000029309  | 1.12  | 2.48E-49 | Sparcl1   | protein_coding | 12.40 | 12.42 | 12.35 | 12.25 | 13.53 | 13.46 | 13.58 | 13.31 |
| Up   | ENSMUSG00000019828  | 1.13  | 3.69E-49 | Gm1       | protein_coding | 8.45  | 8.43  | 8.48  | 8.42  | 9.65  | 9.49  | 9.69  | 9.43  |
| Down | ENSMUSG00000019437  | -1.53 | 3.76E-49 | Tlcl1     | protein_coding | 10.02 | 9.86  | 10.04 | 9.90  | 8.57  | 8.30  | 8.35  | 8.52  |
| Down | ENSMUSG00000046523  | -3.08 | 6.75E-49 | Kctd4     | protein_coding | 8.30  | 8.32  | 8.51  | 8.61  | 5.47  | 4.66  | 5.34  | 6.11  |
| Down | ENSMUSG00000032487  | -2.40 | 7.63E-49 | Ptgs2     | protein_coding | 7.07  | 6.86  | 6.99  | 6.73  | 4.82  | 4.51  | 4.59  | 4.88  |
| Up   | ENSMUSG00000027894  | 1.39  | 8.46E-49 | Slc6a17   | protein_coding | 10.98 | 10.92 | 10.93 | 10.71 | 12.14 | 12.24 | 12.56 | 12.09 |
| Up   | ENSMUSG00000035864  | 1.01  | 9.10E-49 | Syt1      | protein_coding | 12.98 | 12.99 | 12.85 | 12.80 | 13.88 | 13.97 | 14.00 | 13.80 |
| Down | ENSMUSG000000061477 | -1.23 | 1.03E-48 | Rps7      | protein_coding | 10.42 | 10.35 | 10.41 | 10.47 | 9.39  | 9.08  | 9.10  | 9.15  |
| Down | ENSMUSG000000022058 | 1.83  | 1.07E-48 | Unc119    | protein_coding | 6.63  | 6.22  | 6.59  | 6.38  | 8.31  | 8.31  | 8.09  | 8.24  |
| Up   | ENSMUSG000000050545 | 1.12  | 1.07E-48 | Chd5      | protein_coding | 10.75 | 10.68 | 10.65 | 10.56 | 11.84 | 11.78 | 11.82 | 11.67 |
| Up   | ENSMUSG000000056553 | 1.01  | 1.13E-48 | Ptprn2    | protein_coding | 10.90 | 10.84 | 10.74 | 10.66 | 11.75 | 11.88 | 11.77 | 11.76 |
| Up   | ENSMUSG000000004085 | 1.75  | 1.17E-48 | Map3k20   | protein_coding | 7.03  | 7.11  | 7.05  | 6.91  | 8.80  | 8.72  | 8.82  | 8.61  |
| Up   | ENSMUSG00000020089  | 1.17  | 1.58E-48 | Ppa1      | protein_coding | 8.10  | 8.20  | 8.22  | 8.22  | 9.21  | 9.30  | 9.43  | 9.40  |
| Up   | ENSMUSG00000021974  | 1.37  | 1.62E-48 | Fgf9      | protein_coding | 7.11  | 7.47  | 7.36  | 7.32  | 8.73  | 8.73  | 8.69  | 8.53  |
| Down | ENSMUSG00000030753  | -1.51 | 2.02E-48 | Thap12    | protein_coding | 9.45  | 9.41  | 9.56  | 9.58  | 7.79  | 7.96  | 8.28  | 7.95  |
| Down | ENSMUSG00000041324  | -2.49 | 2.04E-48 | Inhba     | protein_coding | 6.78  | 6.46  | 6.46  | 6.41  | 4.03  | 4.44  | 4.59  | 4.28  |
| Down | ENSMUSG00000048218  | -2.20 | 2.07E-48 | Amigo2    | protein_coding | 7.34  | 7.23  | 7.36  | 7.39  | 5.46  | 5.28  | 5.17  | 5.10  |
| Down | ENSMUSG00000037235  | -1.14 | 2.19E-48 | Mxd4      | protein_coding | 9.14  | 9.05  | 8.96  | 9.04  | 8.02  | 7.97  | 7.70  | 7.97  |
| Up   | ENSMUSG00000039910  | 1.92  | 3.24E-48 | Cited2    | protein_coding | 7.27  | 7.32  | 7.32  | 7.25  | 6.98  | 8.89  | 9.33  | 9.14  |
| Down | ENSMUSG00000032532  | -1.44 | 3.78E-48 | Cck       | protein_coding | 10.32 | 10.23 | 10.45 | 10.20 | 8.77  | 9.03  | 8.99  | 8.66  |
| Up   | ENSMUSG00000022636  | 1.10  | 3.99E-48 | Alcam     | protein_coding | 9.61  | 9.69  | 9.50  | 9.79  | 10.69 | 10.89 | 10.83 | 10.76 |
| Down | ENSMUSG00000026811  | -1.13 | 5.07E-48 | Slc6galn6 | protein_coding | 9.30  | 9.25  | 9.25  | 8.31  | 6.32  | 6.16  | 6.30  | 8.03  |
| Down | ENSMUSG00000102422  | -1.26 | 5.68E-48 | Irschfp   | lincoding      | 10.41 | 10.40 | 10.48 | 10.33 | 9.00  | 9.23  | 9.12  | 9.12  |
| Down | ENSMUSG00000000184  | -1.36 | 7.42E-48 | Ccn2d     | protein_coding | 9.18  | 9.21  | 9.25  | 9.49  | 7.81  | 8.10  | 7.96  | 7.90  |
| Down | ENSMUSG00000083531  | -2.03 | 8.04E-48 | Sema3e    | protein_coding | 8.70  | 8.56  | 8.50  | 8.24  | 6.64  | 6.57  | 6.46  | 6.53  |
| Down | ENSMUSG00000079435  | -1.42 | 9.48E-48 | Rpl36a    | protein_coding | 9.34  | 9.18  | 9.14  | 9.23  | 7.76  | 7.92  | 7.80  | 7.80  |
| Down | ENSMUSG00000021371  | -2.01 | 1.06E-47 | Mcur1     | protein_coding | 7.81  | 7.72  | 7.93  | 8.02  | 6.35  | 5.64  | 5.64  | 5.99  |
| Up   | ENSMUSG00000014602  | 1.19  | 1.21E-47 | Kif1a     | protein_coding | 12.15 | 11.92 | 11.94 | 11.77 | 13.23 | 13.12 | 13.22 | 12.98 |
| Up   | ENSMUSG00000054013  | 1.02  | 1.22E-47 | Tmem179   | protein_coding | 8.14  | 8.22  | 8.16  | 8.09  | 9.16  | 9.16  | 9.31  | 9.16  |
| Down | ENSMUSG00000029913  | -1.76 | 1.23E-47 | Prdm5     | protein_coding | 7.61  | 7.49  | 7.64  | 7.49  | 5.91  | 5.85  | 5.98  | 5.72  |
| Down | ENSMUSG00000044349  | -1.69 | 1.27E-47 | Shhg11    | protein_coding | 10.67 | 10.96 | 11.01 | 11.00 | 8.86  | 9.33  | 9.19  | 9.47  |
| Up   | ENSMUSG00000033152  | 1.01  | 1.47E-47 | Podxl2    | protein_coding | 9.35  | 9.36  | 9.46  | 9.15  | 10.37 | 10.26 | 10.42 | 10.31 |
| Down | ENSMUSG00000073702  | -1.43 | 1.47E-47 | Rpl31     | protein_coding | 9.95  | 9.97  | 9.98  | 10.09 | 8.33  | 8.81  | 8.53  | 8.59  |
| Up   | ENSMUSG000000055471 | 2.60  | 1.50E-47 | Alk       | protein_coding | 5.34  | 5.59  | 5.78  | 5.16  | 8.14  | 8.17  | 7.90  | 7.60  |
| Down | ENSMUSG000000060402 | -2.85 | 1.55E-47 | Chs1b     | protein_coding | 6.66  | 7.12  | 6.80  | 6.57  | 4.19  | 3.69  | 4.43  | 4.53  |
| Down | ENSMUSG00000038128  | -1.36 | 2.05E-47 | Camk4     | protein_coding | 8.50  | 8.65  | 8.74  | 8.76  | 7.43  | 7.19  | 7.57  | 7.20  |
| Down | ENSMUSG00000012848  | -1.22 | 2.20E-47 | Rps5      | protein_coding | 9.48  | 9.43  | 9.34  | 9.38  | 8.12  | 8.13  | 8.25  | 8.29  |
| Up   | ENSMUSG000000050910 | 1.47  | 2.23E-47 | Cdr2l     | protein_coding | 7.93  | 7.60  | 7.66  | 7.67  | 9.28  | 9.08  | 9.28  | 9.06  |
| Down | ENSMUSG00000026482  | -1.09 | 3.75E-47 | Rgl1      | protein_coding | 10.33 | 10.28 | 10.14 | 10.20 | 9.04  | 9.27  | 8.97  | 9.30  |
| Up   | ENSMUSG00000055733  | 1.55  | 5.04E-47 | Nap1l3    | protein_coding | 7.96  | 7.64  | 7.88  | 7.77  | 9.27  | 9.51  | 9.38  | 9.21  |
| Up   | ENSMUSG00000028773  | 1.25  | 5.74E-47 | Fabp3     | protein_coding | 8.41  | 8.22  | 8.24  | 8.16  | 9.48  | 9.47  | 9.59  | 9.45  |
| Down | ENSMUSG00000042532  | -1.32 | 5.95E-47 | Golga7b   | protein_coding | 9.50  | 9.52  | 9.51  | 9.33  | 8.05  | 8.26  | 8.19  | 8.14  |
| Up   | ENSMUSG00000028431  | 1.04  | 6.07E-47 | Elp1      | protein_coding | 7.86  | 7.79  | 7.71  | 7.81  | 8.73  | 8.79  | 8.94  | 8.83  |
| Down | ENSMUSG00000039458  | -1.44 | 6.81E-47 | Mttr12    | protein_coding | 9.19  | 9.14  | 9.43  | 9.07  | 7.87  | 7.90  | 7.50  | 7.87  |
| Up   | ENSMUSG00000021820  | 1.08  | 6.86E-47 | Camk2g    | protein_coding | 9.85  | 9.95  | 9.89  | 9.78  | 10.88 | 10.99 | 11.03 | 10.84 |
| Up   | ENSMUSG00000016319  | 1.24  | 7.92E-47 | Slc25a5   | protein_coding | 9.23  | 8.97  | 9.08  | 9.02  | 10.29 | 10.37 | 10.49 | 10.14 |
| Up   | ENSMUSG00000031672  | 1.38  | 8.96E-47 | Got2      | protein_coding | 9.44  | 9.55  | 9.38  | 9.32  | 10.80 | 10.79 | 11.00 | 10.59 |
| Up   | ENSMUSG000000022551 | 1.28  | 9.37E-47 | Cyc1      | protein_coding | 8.60  | 8.65  | 8.80  | 8.71  | 9.62  | 9.99  | 10.14 | 9.88  |
| Up   | ENSMUSG00000027820  | 2.59  | 9.56E-47 | Mme       | protein_coding | 6.25  | 6.52  | 6.59  | 6.28  | 8.70  | 8.68  | 8.67  | 8.59  |
| Down | ENSMUSG00000042451  | -2.08 | 1.07E-46 | Nlybph    | protein_coding | 9.31  | 9.02  | 9.28  | 8.89  | 7.20  | 6.84  | 7.53  | 6.63  |
| Up   | ENSMUSG00000078441  | 1.88  | 1.11E-46 | Ass1      | protein_coding | 6.34  | 6.41  | 6.49  | 6.74  | 8.25  | 8.17  | 8.62  | 8.29  |
| Up   | ENSMUSG00000032118  | 1.22  | 1.26E-46 | Fez2      | protein_coding | 10.36 | 10.23 | 10.32 | 10.27 | 11.57 | 11.44 | 11.59 | 11.43 |
| Up   | ENSMUSG00000029054  | 2.39  | 1.45E-46 | Gabrd     | protein_coding | 5.94  | 6.06  | 6.56  | 5.88  | 8.47  | 8.42  | 8.75  | 8.13  |
| Down | ENSMUSG00000025738  | -1.00 | 1.63E-46 | Fbxl16    | protein_coding | 12.99 | 12.89 | 13.02 | 12.83 | 11.92 | 11.94 | 11.86 | 12.01 |
| Up   | ENSMUSG00000029361  | 1.26  | 1.67E-46 | Nos1      | protein_coding | 9.12  | 9.14  | 9.14  | 9.14  | 10.64 | 10.64 | 10.38 | 10.22 |
| Up   | ENSMUSG00000030731  | 1.32  | 1.90E-46 | Syt3      | protein_coding | 8.05  | 7.86  | 7.97  | 7.79  | 9.30  | 9.24  | 9.32  | 9.00  |
| Up   | ENSMUSG00000042744  | 1.07  | 2.09E-46 | Hectd4    | protein_coding | 11.07 | 10.92 | 10.87 | 10.83 | 11.94 | 12.06 | 11.96 | 12.02 |
| Up   | ENSMUSG00000030655  | 1.30  | 3.06E-46 | Smg1      | protein_coding | 10.32 | 10.39 | 10.18 | 10.31 | 11.62 | 11.68 | 11.34 | 11.72 |
| Up   | ENSMUSG00000040710  | 1.76  | 3.12E-46 | Sl8sia4   | protein_coding | 6.89  | 7.17  | 7.33  | 7.27  | 8.71  | 9.17  | 9.17  | 8.98  |
| Down | ENSMUSG00000027971  | -2.87 | 4.49E-46 | Ndst4     | protein_coding | 8.32  | 8.22  | 8.28  | 8.32  | 5.20  | 5.21  | 5.40  | 6.09  |
| Down | ENSMUSG00000090546  | -1.78 | 6.00E-46 | Cdr1      | protein_coding | 13.81 | 13.90 | 13.79 | 13.81 | 11.94 | 12.09 | 12.10 | 12.05 |
| Up   | ENSMUSG00000018707  | 1.44  | 6.20E-46 | Dync1h1   | protein_coding | 11.09 | 10.93 | 10.82 | 10.82 | 12.21 | 12.22 | 12.50 | 12.50 |
| Up   | ENSMUSG000000020900 | 1.09  | 6.73E-46 | Nlyh10    | protein_coding | 10.78 | 10.53 | 10.76 | 10.51 | 11.66 | 11.66 | 11.55 | 11.55 |
| Down | ENSMUSG00000061353  | -2.91 | 9.73E-46 | Cxcl12    | protein_coding | 7.58  | 7.44  | 7.56  | 7.58  | 5.44  | 4.35  | 4.83  | 4.41  |
| Up   | ENSMUSG000000307916 | 1.27  | 9.91E-46 | Ndufv1    | protein_coding | 8.91  | 8.73  | 8.79  | 8.81  | 10.02 | 10.09 | 10.19 | 10.00 |
| Up   | ENSMUSG00000034593  | 1.13  | 1.00E-45 | Myc5a     | protein_coding | 11.36 | 11.34 | 11.20 | 11.48 | 12.48 | 12.40 | 12.56 | 12.14 |
| Down | ENSMUSG00000030231  | -1.03 | 1.01E-45 | Plekha5   | protein_coding | 9.72  | 9.76  | 9.67  | 9.51  | 8.68  | 8.61  | 8.60  | 8.69  |
| Up   | ENSMUSG00000030137  | 2.38  | 1.46E-45 | Tuba8     | protein_coding | 5.97  | 5.98  | 6.05  | 5.70  | 8.21  | 8.31  | 8.36  | 8.00  |
| Up   | ENSMUSG00000074228  | 1.83  | 1.64E-45 | Gm10645   | protein_coding | 5.78  | 5.46  | 5.63  | 5.64  | 7.31  | 7.48  | 7.36  | 7.31  |
| Down | ENSMUSG00000027848  | -3.79 | 1.78E-45 | Olfml3    | protein_coding | 7.25  | 6.93  | 6.50  | 6.76  | 2.97  | 3.28  | 4.27  | 3.57  |
| Up   | ENSMUSG00000037428  | 2.11  | 1.97E-45 | Vgf       | protein_coding | 8.70  | 8.64  | 8.94  | 8.48  | 10.77 | 10.63 | 11.29 | 10.34 |
| Down | ENSMUSG00000040952  | -1.90 | 2.43E-45 | Rps19     | protein_coding | 9.77  | 9.49  | 9.59  | 7.96  | 7.43  | 7.63  | 7.40  | 7.79  |
| Up   | ENSMUSG00000034891  | 1.44  | 6.44E-45 | Sncb      | protein_coding | 11.32 | 11.33 | 11.48 | 11.28 | 12.85 | 12.74 | 12.85 | 12.72 |
| Down | ENSMUSG00000037624  | -1.53 | 6.54E-45 | Kcnk2     | protein_coding | 8.36  | 8.49  | 8.68  | 8.54  | 6.69  | 6.95  | 7.01  | 7.36  |
| Up   | ENSMUSG00000021700  | 1.05  | 7.58E-45 | Rab3c     | protein_coding | 11.90 | 11.96 | 11.80 | 11.89 | 12.86 | 13.02 | 13.02 | 12.85 |
| Up   |                     |       |          |           |                |       |       |       |       |       |       |       |       |

|      |                    |       |          |          |                  |       |       |       |       |       |       |       |       |
|------|--------------------|-------|----------|----------|------------------|-------|-------|-------|-------|-------|-------|-------|-------|
| Down | ENSMUSG00000060938 | -1.40 | 1.03E-44 | Rpl26    | protein_coding   | 11.34 | 11.20 | 11.13 | 11.20 | 9.67  | 9.94  | 9.78  | 9.90  |
| Up   | ENSMUSG00000028780 | 1.72  | 1.30E-44 | Sema3c   | protein_coding   | 6.95  | 6.97  | 6.89  | 6.74  | 8.43  | 8.76  | 8.73  | 8.32  |
| Down | ENSMUSG00000032281 | -2.52 | 1.91E-44 | Acsbg1   | protein_coding   | 8.24  | 8.37  | 8.25  | 8.20  | 5.38  | 6.30  | 5.29  | 6.07  |
| Down | ENSMUSG00000073565 | -2.55 | 1.96E-44 | Prr16    | protein_coding   | 6.39  | 6.38  | 6.42  | 6.46  | 4.52  | 3.94  | 4.04  | 4.08  |
| Up   | ENSMUSG00000021460 | 1.16  | 2.03E-44 | Auh      | protein_coding   | 8.45  | 8.60  | 8.65  | 8.42  | 9.63  | 9.64  | 9.90  | 9.55  |
| Down | ENSMUSG00000020423 | -2.15 | 2.31E-44 | Btg2     | protein_coding   | 6.78  | 7.01  | 6.60  | 7.04  | 4.76  | 5.16  | 4.54  | 4.97  |
| Up   | ENSMUSG00000025969 | -1.07 | 2.33E-44 | Klf7     | protein_coding   | 9.01  | 8.97  | 8.96  | 8.96  | 7.80  | 7.80  | 7.32  | 8.09  |
| Up   | ENSMUSG00000005882 | 1.32  | 2.62E-44 | Ucp1     | protein_coding   | 8.02  | 8.06  | 8.14  | 7.98  | 9.40  | 9.19  | 9.48  | 9.35  |
| Up   | ENSMUSG00000024948 | 1.18  | 2.88E-44 | Map4k2   | protein_coding   | 7.62  | 7.71  | 7.51  | 7.60  | 8.65  | 8.80  | 8.92  | 8.72  |
| Up   | ENSMUSG00000057378 | 1.35  | 3.46E-44 | Ryr3     | protein_coding   | 9.50  | 9.60  | 9.53  | 9.41  | 10.71 | 10.90 | 10.65 | 11.11 |
| Down | ENSMUSG00000042686 | -1.72 | 3.94E-44 | Jph1     | protein_coding   | 8.52  | 8.63  | 8.77  | 8.47  | 7.11  | 6.57  | 6.92  | 6.98  |
| Up   | ENSMUSG00000038462 | 1.06  | 4.19E-44 | Uqcrls1  | protein_coding   | 8.74  | 8.73  | 8.82  | 8.65  | 9.70  | 9.94  | 9.78  | 9.72  |
| Down | ENSMUSG00000045312 | -2.34 | 5.58E-44 | Lhfp12   | protein_coding   | 7.32  | 7.51  | 7.34  | 7.28  | 5.40  | 4.68  | 5.20  | 5.28  |
| Down | ENSMUSG00000055723 | -2.59 | 5.86E-44 | Rras2    | protein_coding   | 7.15  | 7.14  | 7.58  | 7.19  | 4.19  | 4.90  | 4.77  | 5.33  |
| Up   | ENSMUSG00000033597 | 1.12  | 6.04E-44 | Caskin1  | protein_coding   | 9.63  | 9.58  | 9.44  | 9.37  | 10.63 | 10.62 | 10.74 | 10.50 |
| Down | ENSMUSG00000001741 | -2.38 | 7.90E-44 | Il16     | protein_coding   | 7.78  | 7.75  | 7.78  | 7.38  | 5.66  | 5.49  | 5.23  | 5.40  |
| Up   | ENSMUSG00000042401 | 1.21  | 8.68E-44 | Crtac1   | protein_coding   | 8.60  | 8.45  | 8.52  | 8.38  | 9.64  | 9.64  | 9.93  | 9.53  |
| Down | ENSMUSG00000009519 | -2.33 | 8.72E-44 | Pou3f2   | protein_coding   | 7.37  | 7.58  | 7.51  | 7.57  | 5.29  | 5.65  | 4.50  | 5.50  |
| Down | ENSMUSG00000024558 | -1.18 | 9.86E-44 | Mapk4    | protein_coding   | 9.57  | 9.45  | 9.63  | 9.37  | 8.22  | 8.51  | 8.33  | 8.24  |
| Up   | ENSMUSG00000029754 | 2.79  | 1.72E-43 | Dlx6     | protein_coding   | 5.08  | 5.68  | 5.70  | 5.86  | 8.23  | 8.50  | 8.06  | 8.14  |
| Up   | ENSMUSG00000004455 | 1.16  | 1.59E-43 | Ppp1cc   | protein_coding   | 8.72  | 8.59  | 8.70  | 8.64  | 9.81  | 9.95  | 9.58  | 9.58  |
| Up   | ENSMUSG00000050711 | 2.44  | 2.25E-43 | Scg2     | protein_coding   | 9.24  | 9.19  | 9.40  | 8.99  | 11.62 | 11.35 | 12.04 | 11.45 |
| Down | ENSMUSG00000048897 | -1.33 | 2.45E-43 | Zfp710   | protein_coding   | 7.57  | 7.66  | 7.65  | 6.51  | 6.11  | 6.33  | 6.11  | 6.27  |
| Up   | ENSMUSG00000034324 | 3.02  | 2.50E-43 | Tmem132c | protein_coding   | 5.83  | 5.72  | 5.59  | 5.91  | 8.57  | 8.80  | 8.78  | 8.60  |
| Up   | ENSMUSG00000007021 | 1.36  | 2.92E-43 | Syng3    | protein_coding   | 8.94  | 9.02  | 8.98  | 8.86  | 10.48 | 10.24 | 10.32 | 10.17 |
| Up   | ENSMUSG00000036862 | 1.84  | 3.16E-43 | Dchs1    | protein_coding   | 6.85  | 6.67  | 6.89  | 6.69  | 8.63  | 8.57  | 8.88  | 8.16  |
| Up   | ENSMUSG00000040687 | 1.10  | 3.77E-43 | Madd     | protein_coding   | 10.11 | 10.04 | 9.94  | 9.75  | 11.04 | 11.13 | 11.16 | 10.93 |
| Down | ENSMUSG00000021127 | -2.70 | 3.92E-43 | Zfp361f1 | protein_coding   | 7.38  | 7.65  | 7.48  | 7.78  | 4.99  | 4.70  | 4.54  | 5.65  |
| Down | ENSMUSG00000033981 | -1.01 | 4.06E-43 | Gria2    | protein_coding   | 12.07 | 12.09 | 12.04 | 12.09 | 10.86 | 11.24 | 10.96 | 11.16 |
| Down | ENSMUSG00000022112 | -2.42 | 4.46E-43 | Gpc5     | protein_coding   | 6.93  | 7.39  | 7.26  | 7.31  | 4.34  | 4.87  | 5.00  | 5.44  |
| Down | ENSMUSG00000021750 | -3.85 | 4.68E-43 | Fam107a  | protein_coding   | 12.25 | 12.12 | 11.66 | 11.21 | 8.29  | 8.67  | 7.00  | 7.65  |
| Up   | ENSMUSG00000034310 | 1.55  | 5.96E-43 | Tmem132d | protein_coding   | 7.43  | 7.84  | 7.47  | 7.55  | 9.23  | 8.98  | 9.29  | 8.90  |
| Down | ENSMUSG00000024748 | -1.06 | 6.47E-43 | Seip1    | protein_coding   | 9.99  | 9.99  | 9.85  | 9.75  | 8.64  | 8.64  | 8.79  | 8.96  |
| Up   | ENSMUSG00000026131 | 1.27  | 6.71E-43 | Dat      | protein_coding   | 11.77 | 11.60 | 11.60 | 11.66 | 13.11 | 13.11 | 12.64 | 13.04 |
| Up   | ENSMUSG00000053626 | 2.74  | 7.94E-43 | Tll1     | protein_coding   | 5.26  | 5.75  | 6.00  | 5.73  | 8.35  | 8.20  | 8.73  | 8.01  |
| Up   | ENSMUSG00000086663 | 1.13  | 7.94E-43 | Clec16a  | protein_coding   | 9.30  | 9.25  | 9.40  | 9.12  | 10.41 | 10.39 | 10.58 | 10.10 |
| Up   | ENSMUSG00000005069 | 1.61  | 8.48E-43 | Pex5     | protein_coding   | 7.16  | 7.19  | 7.00  | 7.10  | 8.82  | 8.36  | 8.86  | 8.70  |
| Up   | ENSMUSG00000103310 | 1.24  | 8.64E-43 | Pcdha12  | protein_coding   | 9.09  | 8.98  | 8.82  | 8.98  | 10.16 | 10.34 | 10.21 | 10.07 |
| Up   | ENSMUSG00000043668 | 2.26  | 8.80E-43 | Tox3     | protein_coding   | 6.30  | 6.26  | 6.31  | 6.43  | 8.33  | 8.75  | 8.61  | 8.41  |
| Up   | ENSMUSG00000028971 | 3.77  | 1.13E-42 | Cort     | protein_coding   | 4.45  | 4.05  | 4.28  | 4.22  | 7.47  | 7.48  | 8.62  | 7.63  |
| Up   | ENSMUSG00000037470 | 1.05  | 1.15E-42 | Uggt1    | protein_coding   | 8.57  | 8.32  | 8.41  | 8.35  | 9.50  | 9.47  | 9.54  | 9.31  |
| Down | ENSMUSG00000032434 | -2.14 | 1.28E-42 | Cmtm6    | protein_coding   | 6.92  | 7.10  | 6.80  | 7.17  | 4.94  | 4.99  | 5.25  | 5.31  |
| Up   | ENSMUSG00000104318 | 1.24  | 1.64E-42 | Pcdha7   | protein_coding   | 9.12  | 8.96  | 8.80  | 8.97  | 10.16 | 10.35 | 10.21 | 10.08 |
| Down | ENSMUSG00000042613 | -1.75 | 1.76E-42 | Pbxip1   | protein_coding   | 7.17  | 7.05  | 7.16  | 7.10  | 5.49  | 5.18  | 5.75  | 5.37  |
| Up   | ENSMUSG00000025240 | 1.28  | 1.77E-42 | Sacm11   | protein_coding   | 8.84  | 8.81  | 8.54  | 8.70  | 9.90  | 9.93  | 10.27 | 9.86  |
| Up   | ENSMUSG00000034613 | 1.26  | 1.86E-42 | Ppm1h    | protein_coding   | 9.57  | 9.45  | 9.35  | 9.34  | 10.66 | 10.94 | 10.56 | 10.55 |
| Up   | ENSMUSG00000000088 | 1.22  | 2.05E-42 | Cxv5a    | protein_coding   | 8.60  | 8.61  | 8.75  | 8.74  | 9.94  | 9.94  | 9.96  | 9.75  |
| Down | ENSMUSG00000028833 | -1.08 | 2.16E-42 | Olfm1    | protein_coding   | 13.07 | 12.93 | 13.02 | 12.92 | 11.97 | 11.94 | 11.98 | 11.74 |
| Down | ENSMUSG00000033730 | -3.46 | 2.89E-42 | Egr3     | protein_coding   | 9.26  | 9.40  | 9.35  | 9.26  | 4.54  | 6.32  | 6.04  | 6.29  |
| Up   | ENSMUSG00000030357 | 1.50  | 3.32E-42 | Fkbp4    | protein_coding   | 8.89  | 8.55  | 8.80  | 8.62  | 10.51 | 10.07 | 10.23 | 9.98  |
| Up   | ENSMUSG00000026526 | 1.27  | 3.32E-42 | Fh1      | protein_coding   | 7.70  | 7.65  | 7.73  | 7.81  | 8.99  | 9.09  | 8.95  | 8.87  |
| Up   | ENSMUSG00000025825 | 1.15  | 3.75E-42 | Iscu     | protein_coding   | 8.53  | 8.53  | 8.55  | 8.66  | 9.61  | 9.78  | 9.85  | 9.58  |
| Up   | ENSMUSG00000038664 | 1.06  | 3.78E-42 | Herc1    | protein_coding   | 10.55 | 10.51 | 10.43 | 10.44 | 11.52 | 11.55 | 11.44 | 11.64 |
| Up   | ENSMUSG00000053024 | 1.45  | 4.37E-42 | Cntn2    | protein_coding   | 9.17  | 9.00  | 8.87  | 8.81  | 10.63 | 10.17 | 10.54 | 10.25 |
| Up   | ENSMUSG00000041000 | 1.86  | 4.93E-42 | Trim62   | protein_coding   | 6.65  | 6.58  | 6.99  | 6.75  | 8.37  | 8.78  | 8.78  | 8.26  |
| Down | ENSMUSG00000042604 | -1.60 | 5.86E-42 | Kcna4    | protein_coding   | 8.40  | 8.37  | 8.64  | 8.35  | 6.69  | 6.67  | 7.24  | 6.84  |
| Up   | ENSMUSG00000029168 | 1.56  | 7.03E-42 | Dpysl5   | protein_coding   | 6.98  | 7.05  | 7.13  | 7.09  | 8.40  | 8.69  | 8.81  | 8.71  |
| Up   | ENSMUSG00000045731 | 3.31  | 7.94E-42 | Pnoc     | protein_coding   | 4.82  | 5.41  | 5.57  | 5.37  | 8.44  | 8.35  | 8.84  | 8.26  |
| Up   | ENSMUSG00000016349 | 1.20  | 8.76E-42 | Eef1a2   | protein_coding   | 12.11 | 12.02 | 11.99 | 11.81 | 13.27 | 13.18 | 13.28 | 12.99 |
| Down | ENSMUSG00000048163 | -3.33 | 8.85E-42 | Seip1g   | protein_coding   | 7.00  | 6.95  | 6.95  | 6.91  | 4.13  | 3.98  | 2.93  | 4.50  |
| Down | ENSMUSG00000046404 | -1.40 | 1.01E-41 | Ycd1     | protein_coding   | 8.02  | 7.98  | 8.09  | 8.22  | 6.57  | 6.76  | 6.95  | 6.53  |
| Up   | ENSMUSG00000042826 | 1.36  | 1.07E-41 | Fgf11    | protein_coding   | 7.92  | 7.79  | 7.90  | 8.06  | 9.15  | 9.36  | 9.30  | 9.23  |
| Down | ENSMUSG00000050600 | -2.47 | 1.16E-41 | Zfp831   | protein_coding   | 8.69  | 8.52  | 8.46  | 8.49  | 5.58  | 6.84  | 5.56  | 6.18  |
| Down | ENSMUSG00000020326 | -1.50 | 1.26E-41 | Ccng1    | protein_coding   | 9.83  | 9.79  | 9.66  | 9.75  | 8.42  | 8.45  | 7.99  | 8.17  |
| Up   | ENSMUSG00000004366 | 3.69  | 1.28E-41 | Sst      | protein_coding   | 10.23 | 9.96  | 10.32 | 10.17 | 13.91 | 13.64 | 14.15 | 13.69 |
| Down | ENSMUSG00000060036 | -1.00 | 1.52E-41 | Rpl3     | protein_coding   | 11.72 | 11.74 | 11.75 | 11.71 | 10.68 | 10.75 | 10.68 | 10.79 |
| Down | ENSMUSG00000031833 | -1.06 | 1.62E-41 | Mast3    | protein_coding   | 10.63 | 10.52 | 10.62 | 10.32 | 9.65  | 9.43  | 9.39  | 9.38  |
| Up   | ENSMUSG00000031428 | 1.00  | 1.70E-41 | Zochc18  | protein_coding   | 9.69  | 9.63  | 9.70  | 9.63  | 10.50 | 10.69 | 10.78 | 10.66 |
| Down | ENSMUSG00000033623 | -1.07 | 1.82E-41 | Pcgf3    | protein_coding   | 9.26  | 9.17  | 9.27  | 9.38  | 8.13  | 8.38  | 8.10  | 8.24  |
| Down | ENSMUSG00000041852 | -1.16 | 1.83E-41 | Tcf20    | protein_coding   | 12.43 | 12.46 | 12.33 | 12.22 | 11.25 | 11.42 | 11.10 | 11.02 |
| Down | ENSMUSG00000024642 | -1.07 | 1.99E-41 | Tle4     | protein_coding   | 8.79  | 9.02  | 8.71  | 8.84  | 7.66  | 7.75  | 7.92  | 7.92  |
| Down | ENSMUSG00000036095 | -1.22 | 2.71E-41 | Dgkb     | protein_coding   | 10.02 | 10.10 | 9.97  | 9.97  | 8.67  | 8.97  | 8.89  | 8.98  |
| Down | ENSMUSG00000071637 | -2.54 | 2.94E-41 | Eebpdp   | protein_coding   | 7.02  | 7.07  | 7.01  | 6.67  | 4.97  | 4.47  | 4.45  | 4.33  |
| Up   | ENSMUSG00000103442 | 1.17  | 2.98E-41 | Pcdmat1  | protein_coding   | 9.06  | 8.94  | 8.75  | 8.95  | 10.15 | 10.34 | 10.22 | 10.07 |
| Down | ENSMUSG00000059288 | -1.31 | 3.59E-41 | Cdyl     | protein_coding   | 8.68  | 8.69  | 8.64  | 8.70  | 7.40  | 7.65  | 7.32  | 7.10  |
| Down | ENSMUSG00000028788 | -1.07 | 4.18E-41 | Ptp4a2   | protein_coding   | 10.32 | 10.39 | 10.36 | 10.41 | 9.50  | 9.31  | 9.07  | 9.32  |
| Up   | ENSMUSG00000025855 | 1.06  | 4.45E-41 | Pkari1b  | protein_coding   | 11.02 | 11.09 | 10.97 | 10.82 | 11.93 | 12.13 | 12.13 | 11.92 |
| Down | ENSMUSG00000025794 | -1.30 | 5.02E-41 | Rpl14    | protein_coding   | 10.32 | 10.22 | 10.32 | 10.31 | 8.92  | 9.01  | 8.92  | 9.03  |
| Up   | ENSMUSG00000032312 | 1.74  | 5.34E-41 | Csk      | protein_coding   | 7.22  | 7.31  | 6.86  | 6.93  | 8.72  | 8.76  | 9.06  | 8.61  |
| Down | ENSMUSG00000020027 | -1.82 | 5.74E-41 | Socs2    | protein_coding   | 7.18  | 7.65  | 7.61  | 7.33  | 5.52  | 5.89  | 5.59  | 5.83  |
| Up   | ENSMUSG00000060450 | 1.03  | 6.01E-41 | Rnf14    | protein_coding   | 10.85 | 10.81 | 10.73 | 10.76 | 11.75 | 11.93 | 11.82 | 11.77 |
| Down | ENSMUSG00000001943 | -3.79 | 6.64E-41 | Vsig2    | protein_coding   | 6.10  | 6.08  | 6.29  | 6.12  | 2.66  | 3.47  | 2.00  | 3.78  |
| Up   | ENSMUSG00000037492 | 1.26  | 6.71E-41 | Zmat4    | protein_coding   | 8.71  | 8.55  | 8.81  | 8.69  | 9.72  | 9.96  | 10.17 | 9.90  |
| Up   | ENSMUSG00000060279 | 1.06  | 7.21E-41 | Ap2a1    | protein_coding   | 9.86  | 9.93  | 9.93  | 9.93  | 10.93 | 10.94 | 10.94 | 10.86 |
| Up   | ENSMUSG00000061904 | 1.06  | 7.59E-41 | Sic25a3  | protein_coding   | 10.06 | 10.05 | 9.92  | 9.92  | 10.40 | 11.17 | 11.17 | 10.89 |
| Up   | ENSMUSG00000026858 | 1.27  | 8.33E-41 | Miga2    | protein_coding   | 8.24  | 7.93  | 8.23  | 7.94  | 9.42  | 9.28  | 9.46  | 9.22  |
| Up   | ENSMUSG00000032918 | 1.14  | 9.80E-41 | Rab3gap2 | protein_coding</ |       |       |       |       |       |       |       |       |

|      |                     |       |          |          |                |       |       |       |       |       |       |       |       |
|------|---------------------|-------|----------|----------|----------------|-------|-------|-------|-------|-------|-------|-------|-------|
| Down | ENSMUSG00000074305  | -1.05 | 1.60E-40 | Peak1    | protein_coding | 9.63  | 9.50  | 9.49  | 9.42  | 8.63  | 8.51  | 8.26  | 8.45  |
| Up   | ENSMUSG00000001416  | 1.18  | 1.65E-40 | Cct3     | protein_coding | 8.32  | 8.22  | 8.16  | 8.22  | 9.58  | 9.29  | 9.33  | 9.38  |
| Up   | ENSMUSG000000038429 | 1.06  | 1.65E-40 | Usp5     | protein_coding | 9.10  | 9.04  | 9.03  | 8.85  | 9.95  | 10.06 | 10.13 | 10.07 |
| Down | ENSMUSG000000034998 | -1.58 | 1.86E-40 | Foxn2    | protein_coding | 7.80  | 8.07  | 7.86  | 8.01  | 6.06  | 6.66  | 6.36  | 6.47  |
| Down | ENSMUSG000000012126 | -1.45 | 2.14E-40 | Ubxn11   | protein_coding | 7.72  | 7.57  | 7.62  | 7.70  | 5.90  | 6.39  | 6.32  | 6.34  |
| Up   | ENSMUSG000000021188 | 1.19  | 2.23E-40 | Trp11    | protein_coding | 9.10  | 9.14  | 9.08  | 9.22  | 10.21 | 10.41 | 10.35 | 10.33 |
| Down | ENSMUSG000000023448 | -2.28 | 2.29E-40 | Gata4    | protein_coding | 7.49  | 7.49  | 7.53  | 7.58  | 7.21  | 5.37  | 5.34  | 5.31  |
| Up   | ENSMUSG000000029161 | 1.96  | 2.29E-40 | Cgref1   | protein_coding | 6.23  | 6.62  | 6.69  | 7.04  | 8.60  | 8.57  | 8.60  | 8.62  |
| Down | ENSMUSG000000051615 | -1.04 | 2.41E-40 | Rap2a    | protein_coding | 9.95  | 10.02 | 10.08 | 10.08 | 9.19  | 8.90  | 8.53  | 9.05  |
| Up   | ENSMUSG000000023236 | 1.14  | 2.58E-40 | Scg5     | protein_coding | 9.27  | 9.16  | 9.20  | 9.21  | 10.29 | 10.19 | 10.10 | 10.32 |
| Up   | ENSMUSG000000038370 | 2.63  | 2.91E-40 | Pcp411   | protein_coding | 8.38  | 8.27  | 8.06  | 8.65  | 11.07 | 11.09 | 11.00 | 10.73 |
| Up   | ENSMUSG000000045613 | 2.08  | 3.12E-40 | Chrm2    | protein_coding | 6.67  | 6.62  | 6.40  | 6.61  | 8.61  | 8.64  | 8.71  | 8.50  |
| Down | ENSMUSG000000026176 | -1.76 | 3.19E-40 | Ctdsp1   | protein_coding | 7.33  | 7.21  | 7.37  | 7.34  | 5.71  | 5.64  | 5.63  | 5.59  |
| Up   | ENSMUSG000000029148 | 1.04  | 4.19E-40 | Nrbp1    | protein_coding | 8.24  | 8.30  | 8.29  | 8.24  | 9.28  | 9.29  | 9.43  | 9.20  |
| Down | ENSMUSG000000022587 | -1.32 | 4.69E-40 | Ly6e     | protein_coding | 9.58  | 9.59  | 9.45  | 9.28  | 7.96  | 8.33  | 8.28  | 8.08  |
| Down | ENSMUSG000000074129 | -1.43 | 4.70E-40 | Rpl13a   | protein_coding | 11.67 | 11.42 | 11.59 | 11.55 | 10.18 | 10.19 | 10.04 | 10.11 |
| Down | ENSMUSG000000022439 | -3.62 | 5.11E-40 | Parvg    | protein_coding | 6.05  | 5.89  | 6.32  | 5.94  | 2.97  | 2.85  | 3.71  | 3.06  |
| Down | ENSMUSG000000025810 | -1.49 | 5.59E-40 | Nrp1     | protein_coding | 9.09  | 9.27  | 9.29  | 9.07  | 7.07  | 8.00  | 7.46  | 7.62  |
| Up   | ENSMUSG000000005034 | 1.09  | 6.52E-40 | Prkab    | protein_coding | 10.79 | 10.92 | 10.72 | 11.01 | 11.79 | 12.03 | 11.98 | 12.00 |
| Down | ENSMUSG000000044252 | -1.05 | 6.90E-40 | Slc45a1  | protein_coding | 9.98  | 10.14 | 9.94  | 10.03 | 11.18 | 10.95 | 11.17 | 10.97 |
| Down | ENSMUSG000000025362 | -1.35 | 7.54E-40 | Rps26    | protein_coding | 10.08 | 10.14 | 10.12 | 10.22 | 8.67  | 8.85  | 8.85  | 8.80  |
| Down | ENSMUSG000000025318 | -1.00 | 7.54E-40 | Jph3     | protein_coding | 11.30 | 11.19 | 11.28 | 11.03 | 10.27 | 10.27 | 10.17 | 10.11 |
| Up   | ENSMUSG000000052105 | 1.25  | 8.17E-40 | Mtcl1    | protein_coding | 8.72  | 8.34  | 8.54  | 8.33  | 9.81  | 9.83  | 9.76  | 9.51  |
| Up   | ENSMUSG000000068220 | 2.99  | 1.05E-39 | Lgals1   | protein_coding | 5.21  | 4.56  | 5.40  | 5.37  | 8.08  | 7.63  | 8.49  | 7.71  |
| Up   | ENSMUSG000000103707 | 1.27  | 1.50E-39 | Pcdha6   | protein_coding | 9.11  | 8.98  | 8.77  | 8.97  | 10.18 | 10.40 | 10.21 | 10.07 |
| Down | ENSMUSG000000033960 | -2.52 | 1.56E-39 | Jcad     | protein_coding | 9.57  | 9.69  | 9.45  | 9.57  | 7.68  | 6.32  | 7.04  | 7.01  |
| Up   | ENSMUSG000000031960 | 1.35  | 1.63E-39 | Aars     | protein_coding | 8.93  | 9.00  | 8.92  | 8.87  | 10.27 | 10.25 | 10.45 | 10.12 |
| Up   | ENSMUSG000000023084 | 1.77  | 2.20E-39 | Lrrc71   | protein_coding | 6.95  | 6.67  | 6.64  | 6.63  | 8.39  | 8.59  | 8.60  | 8.26  |
| Down | ENSMUSG000000050953 | -2.89 | 2.35E-39 | Gja1     | protein_coding | 9.69  | 9.74  | 9.70  | 9.84  | 6.33  | 6.83  | 6.49  | 7.59  |
| Up   | ENSMUSG000000020366 | 1.13  | 2.49E-39 | Mapk9    | protein_coding | 10.11 | 10.14 | 10.17 | 10.28 | 11.13 | 11.33 | 11.51 | 11.22 |
| Down | ENSMUSG000000002602 | -2.74 | 3.32E-39 | Axl      | protein_coding | 7.61  | 7.58  | 7.98  | 7.58  | 4.54  | 5.32  | 4.77  | 5.56  |
| Up   | ENSMUSG000000030718 | 1.07  | 3.45E-39 | Ppme1    | protein_coding | 9.58  | 9.53  | 9.43  | 9.26  | 10.49 | 10.57 | 10.61 | 10.40 |
| Up   | ENSMUSG000000039838 | 1.46  | 4.21E-39 | Slc45a1  | protein_coding | 7.96  | 7.77  | 8.10  | 7.60  | 9.43  | 9.23  | 9.59  | 9.13  |
| Up   | ENSMUSG000000027010 | 1.08  | 4.80E-39 | Slc25a12 | protein_coding | 9.39  | 9.46  | 9.45  | 9.45  | 10.38 | 10.38 | 10.54 | 10.31 |
| Up   | ENSMUSG000000034488 | 1.09  | 4.85E-39 | Edi3     | protein_coding | 9.24  | 9.19  | 9.08  | 9.31  | 10.45 | 10.17 | 10.27 | 10.26 |
| Down | ENSMUSG000000048251 | -1.13 | 6.47E-39 | Bcl11b   | protein_coding | 10.42 | 10.27 | 10.42 | 10.17 | 9.09  | 9.32  | 9.16  | 9.20  |
| Down | ENSMUSG000000063632 | -1.60 | 7.29E-39 | Sox11    | protein_coding | 8.48  | 8.34  | 8.13  | 8.59  | 6.78  | 6.72  | 6.71  | 7.08  |
| Up   | ENSMUSG000000045777 | 1.52  | 7.51E-39 | Ifftm10  | protein_coding | 6.85  | 6.83  | 6.49  | 8.16  | 8.44  | 8.22  | 8.44  | 8.16  |
| Down | ENSMUSG000000031565 | -1.07 | 8.09E-39 | Fgfr1    | protein_coding | 9.50  | 9.39  | 9.47  | 9.29  | 8.36  | 8.34  | 8.39  | 8.33  |
| Up   | ENSMUSG000000104148 | 1.30  | 8.42E-39 | Pcdha2   | protein_coding | 9.08  | 8.94  | 8.75  | 8.95  | 10.18 | 10.37 | 10.24 | 10.11 |
| Up   | ENSMUSG000000006299 | 1.26  | 1.06E-38 | Aamp     | protein_coding | 9.24  | 9.18  | 9.09  | 9.14  | 10.58 | 10.33 | 10.40 | 10.34 |
| Up   | ENSMUSG000000096606 | 2.67  | 1.19E-38 | Tpbg1    | protein_coding | 5.19  | 5.21  | 5.57  | 5.42  | 7.68  | 7.78  | 8.15  | 7.98  |
| Down | ENSMUSG000000028128 | -2.27 | 1.26E-38 | F3       | protein_coding | 7.49  | 7.71  | 7.48  | 7.20  | 4.97  | 5.59  | 4.97  | 5.64  |
| Down | ENSMUSG000000067288 | -1.80 | 1.41E-38 | Rps28    | protein_coding | 9.74  | 9.67  | 9.71  | 9.71  | 7.69  | 8.11  | 7.69  | 8.18  |
| Down | ENSMUSG000000047485 | -1.35 | 1.67E-38 | Kih34    | protein_coding | 8.87  | 8.65  | 8.85  | 8.52  | 7.17  | 7.61  | 7.15  | 7.25  |
| Down | ENSMUSG000000036052 | -1.21 | 1.80E-38 | Dnajb5   | protein_coding | 9.30  | 9.08  | 9.35  | 9.19  | 7.95  | 8.34  | 7.86  | 7.96  |
| Down | ENSMUSG000000059911 | -2.33 | 2.16E-38 | Nptx2    | protein_coding | 6.73  | 6.62  | 6.73  | 6.62  | 4.61  | 4.27  | 4.46  | 5.30  |
| Up   | ENSMUSG000000031840 | 1.30  | 2.20E-38 | Rab3a    | protein_coding | 11.43 | 11.45 | 11.47 | 11.40 | 12.66 | 12.87 | 12.82 | 12.60 |
| Up   | ENSMUSG000000000399 | 1.14  | 2.20E-38 | Ndufa9   | protein_coding | 8.56  | 8.52  | 8.54  | 8.50  | 9.64  | 9.73  | 9.64  | 9.69  |
| Up   | ENSMUSG000000045875 | 1.69  | 2.27E-38 | Adra1a   | protein_coding | 6.35  | 6.50  | 6.48  | 6.47  | 8.00  | 8.25  | 8.19  | 7.89  |
| Down | ENSMUSG000000030270 | -2.26 | 2.28E-38 | Cpne9    | protein_coding | 6.07  | 6.33  | 6.30  | 6.20  | 4.44  | 4.35  | 3.79  | 4.28  |
| Up   | ENSMUSG000000039512 | 1.52  | 2.55E-38 | Uhrf1bp1 | protein_coding | 7.02  | 6.99  | 6.78  | 6.99  | 8.23  | 8.72  | 8.46  | 8.30  |
| Down | ENSMUSG000000051067 | -1.97 | 2.55E-38 | Lingo3   | protein_coding | 7.70  | 7.45  | 7.96  | 7.31  | 5.56  | 5.93  | 5.84  | 5.59  |
| Up   | ENSMUSG000000007440 | 1.26  | 2.56E-38 | Pcdha11  | protein_coding | 9.08  | 8.93  | 8.75  | 8.95  | 10.13 | 10.34 | 10.23 | 10.05 |
| Down | ENSMUSG000000003573 | -1.58 | 3.16E-38 | Homer3   | protein_coding | 8.04  | 7.85  | 8.21  | 7.81  | 6.29  | 6.55  | 6.65  | 6.27  |
| Down | ENSMUSG000000006356 | -2.13 | 3.33E-38 | Crip2    | protein_coding | 7.60  | 7.74  | 7.60  | 7.94  | 5.52  | 6.28  | 5.05  | 5.61  |
| Down | ENSMUSG000000044533 | -1.30 | 3.75E-38 | Rps2     | protein_coding | 10.31 | 10.13 | 10.27 | 10.27 | 9.16  | 8.81  | 8.98  | 8.82  |
| Down | ENSMUSG000000032528 | -2.19 | 3.79E-38 | Vipr1    | protein_coding | 6.81  | 7.25  | 7.20  | 6.98  | 5.12  | 4.58  | 4.77  | 5.47  |
| Down | ENSMUSG000000026581 | -3.21 | 3.91E-38 | Laptn5   | protein_coding | 7.19  | 7.40  | 6.94  | 7.00  | 4.19  | 3.69  | 4.71  | 4.17  |
| Down | ENSMUSG000000064023 | -3.79 | 4.08E-38 | Kik8     | protein_coding | 6.08  | 5.78  | 6.26  | 6.02  | 3.04  | 3.05  | 2.71  | 3.44  |
| Down | ENSMUSG000000028392 | -1.67 | 4.67E-38 | Ptbp3    | protein_coding | 7.94  | 8.26  | 8.02  | 7.95  | 6.04  | 6.50  | 6.49  | 6.52  |
| Up   | ENSMUSG000000087006 | 1.34  | 5.01E-38 | Gm13889  | protein_coding | 6.93  | 7.12  | 7.19  | 7.21  | 8.44  | 8.58  | 8.33  | 8.38  |
| Down | ENSMUSG000000022505 | -2.57 | 5.45E-38 | Emp2     | protein_coding | 6.92  | 6.65  | 6.65  | 6.72  | 4.28  | 3.43  | 4.73  | 4.83  |
| Up   | ENSMUSG000000031994 | 2.72  | 6.43E-38 | Adams2   | protein_coding | 5.50  | 5.12  | 5.17  | 5.22  | 7.27  | 7.88  | 8.04  | 8.04  |
| Down | ENSMUSG000000028838 | -1.53 | 6.52E-38 | Extl1    | protein_coding | 8.31  | 8.30  | 8.29  | 8.28  | 6.58  | 6.50  | 6.87  | 7.15  |
| Down | ENSMUSG000000034480 | -1.32 | 7.03E-38 | Diaph2   | protein_coding | 8.08  | 8.10  | 7.93  | 8.04  | 6.62  | 6.81  | 6.72  | 6.84  |
| Down | ENSMUSG000000071757 | -1.82 | 7.26E-38 | Zhx2     | protein_coding | 8.43  | 8.27  | 8.29  | 8.11  | 6.86  | 6.40  | 6.04  | 6.60  |
| Up   | ENSMUSG000000032554 | 1.42  | 7.36E-38 | Trf      | protein_coding | 10.02 | 9.77  | 9.86  | 9.84  | 11.59 | 10.95 | 11.13 | 11.44 |
| Up   | ENSMUSG000000017740 | 1.08  | 7.51E-38 | Slc12a5  | protein_coding | 10.77 | 10.49 | 10.63 | 10.45 | 11.74 | 11.69 | 11.67 | 11.57 |
| Down | ENSMUSG000000033949 | -1.46 | 7.94E-38 | B3galt2  | protein_coding | 9.04  | 9.36  | 8.83  | 9.15  | 7.43  | 7.92  | 7.55  | 7.71  |
| Down | ENSMUSG000000044352 | -2.52 | 8.48E-38 | Sowaha   | protein_coding | 9.81  | 9.65  | 9.69  | 9.63  | 6.48  | 6.79  | 7.56  | 7.39  |
| Down | ENSMUSG000000042460 | -1.67 | 8.58E-38 | Ctga11   | protein_coding | 7.83  | 7.93  | 7.64  | 7.97  | 6.18  | 6.28  | 6.01  | 6.42  |
| Down | ENSMUSG000000089899 | -1.44 | 1.07E-37 | Gm45713  | protein_coding | 11.64 | 11.39 | 11.56 | 11.51 | 10.16 | 10.16 | 10.08 | 10.08 |
| Up   | ENSMUSG000000024941 | 1.67  | 1.26E-37 | Sey2     | protein_coding | 8.31  | 8.22  | 8.31  | 8.27  | 9.35  | 9.42  | 9.57  | 9.25  |
| Up   | ENSMUSG000000029408 | 1.65  | 1.59E-37 | Acbp9    | protein_coding | 6.94  | 6.71  | 6.85  | 6.98  | 8.59  | 8.67  | 8.40  | 8.26  |
| Up   | ENSMUSG000000039354 | 1.07  | 1.65E-37 | Smarcal1 | protein_coding | 8.39  | 8.19  | 8.21  | 8.29  | 9.19  | 9.43  | 9.48  | 9.21  |
| Up   | ENSMUSG000000008318 | 2.40  | 1.77E-37 | Relt     | protein_coding | 5.57  | 5.28  | 5.91  | 5.20  | 7.70  | 8.03  | 7.61  | 7.85  |
| Down | ENSMUSG000000022296 | -1.21 | 1.95E-37 | Baalc    | protein_coding | 10.11 | 10.08 | 10.04 | 10.11 | 9.05  | 8.79  | 8.87  | 8.80  |
| Down | ENSMUSG000000028878 | -1.04 | 2.26E-37 | Fam76a   | protein_coding | 8.74  | 8.79  | 8.81  | 8.87  | 7.94  | 7.60  | 7.74  | 7.80  |
| Down | ENSMUSG000000020601 | -1.57 | 2.35E-37 | Trib2    | protein_coding | 8.34  | 8.06  | 8.32  | 8.24  | 6.52  | 6.59  | 6.49  | 7.14  |
| Up   | ENSMUSG000000030844 | 1.77  | 2.48E-37 | Rgs10    | protein_coding | 7.51  | 7.56  | 7.58  | 7.66  | 9.40  | 9.14  | 9.53  | 9.22  |
| Down | ENSMUSG000000060802 | -1.23 | 2.48E-37 | B2m      | protein_coding | 8.06  | 7.97  | 7.98  | 8.04  | 6.95  | 6.73  | 6.76  | 6.80  |
| Down | ENSMUSG000000074733 | -1.29 | 2.73E-37 | Zfp950   | protein_coding | 7.81  | 7.84  | 7.87  | 7.81  | 6.32  | 6.32  | 6.59  | 6.72  |
| Down | ENSMUSG000000020362 | -1.39 | 2.98E-37 | Cnot6    | protein_coding | 8.71  | 8.77  | 8.79  | 8.94  | 7.44  | 7.66  | 7.15  | 7.45  |
| Down | ENSMUSG000000054252 | -2.04 | 3.02E-37 | Fgfr3    | protein_coding | 8.24  | 8.43  | 8.47  | 8.37  | 6.04  | 6.75  | 6.57  | 6.63  |
| Up   | ENSMUSG000000103092 | 1.26  | 3.07E-37 | Pcdha5   | protein_coding | 9.12  | 8.98  | 8.78  | 8.99  | 10.18 | 10.37 | 10.24 | 10.09 |

|      |                      |       |          |               |                |       |       |       |       |       |       |       |       |
|------|----------------------|-------|----------|---------------|----------------|-------|-------|-------|-------|-------|-------|-------|-------|
| Down | ENSMUSG00000034731   | -1.09 | 4.37E-37 | Dgkh          | protein_coding | 10.54 | 10.54 | 10.65 | 10.37 | 9.24  | 9.64  | 9.49  | 9.35  |
| Up   | ENSMUSG00000040249   | 1.30  | 4.39E-37 | Lrp1          | protein_coding | 10.72 | 10.45 | 10.50 | 10.46 | 11.94 | 11.83 | 11.65 | 11.88 |
| Down | ENSMUSG00000027574   | -2.75 | 5.03E-37 | Nkain4        | protein_coding | 6.68  | 6.84  | 6.65  | 6.86  | 4.66  | 4.22  | 3.90  | 4.28  |
| Down | ENSMUSG000000072875  | -1.23 | 5.20E-37 | Gpr27         | protein_coding | 8.07  | 8.00  | 7.90  | 8.17  | 7.07  | 6.72  | 6.80  | 6.72  |
| Down | ENSMUSG000000064065  | -1.66 | 6.31E-37 | lpcf1         | protein_coding | 8.32  | 8.58  | 8.24  | 8.63  | 6.40  | 7.02  | 6.95  | 6.86  |
| Up   | ENSMUSG000000027716  | 1.71  | 6.60E-37 | Tpvc3         | protein_coding | 5.78  | 5.72  | 5.91  | 6.11  | 7.50  | 7.81  | 7.47  | 7.30  |
| Up   | ENSMUSG000000059361  | 1.29  | 6.95E-37 | Nhsr2         | protein_coding | 8.12  | 8.44  | 8.22  | 8.38  | 9.37  | 9.69  | 9.51  | 9.60  |
| Down | ENSMUSG00000001788   | -1.62 | 6.95E-37 | Rim2          | protein_coding | 8.12  | 7.91  | 7.80  | 7.78  | 6.55  | 6.56  | 6.46  | 6.32  |
| Down | ENSMUSG000000029761  | -1.70 | 7.14E-37 | Cald1         | protein_coding | 8.06  | 7.92  | 7.98  | 8.20  | 5.97  | 6.63  | 6.57  | 6.29  |
| Down | ENSMUSG000000062760  | -1.20 | 7.24E-37 | Shisa1        | protein_coding | 8.91  | 8.85  | 8.93  | 8.85  | 7.51  | 7.85  | 7.51  | 7.88  |
| Down | ENSMUSG000000038764  | -1.35 | 9.04E-37 | Ptpn3         | protein_coding | 9.11  | 9.17  | 9.08  | 8.91  | 7.71  | 7.98  | 7.54  | 7.68  |
| Up   | ENSMUSG000000018770  | 1.16  | 9.16E-37 | Atp5g3        | protein_coding | 8.93  | 8.89  | 9.03  | 9.00  | 9.99  | 10.22 | 10.26 | 9.99  |
| Down | ENSMUSG00000007892   | -1.78 | 9.90E-37 | Rplp1         | protein_coding | 11.61 | 11.25 | 11.47 | 11.43 | 9.91  | 9.38  | 9.68  | 9.64  |
| Up   | ENSMUSG000000021253  | 1.66  | 1.13E-36 | Tgfb3         | protein_coding | 6.65  | 6.48  | 6.44  | 6.25  | 8.29  | 7.91  | 8.09  | 7.99  |
| Up   | ENSMUSG000000074582  | 1.03  | 1.15E-36 | Arfgef2       | protein_coding | 8.79  | 8.90  | 8.81  | 8.94  | 9.97  | 9.95  | 9.78  | 9.81  |
| Up   | ENSMUSG00000002032   | 1.46  | 1.18E-36 | Tmem25        | protein_coding | 7.18  | 7.16  | 7.09  | 6.77  | 8.33  | 8.57  | 8.64  | 8.39  |
| Down | ENSMUSG000000037263  | -1.27 | 1.52E-36 | Rps16         | protein_coding | 9.30  | 9.20  | 9.15  | 9.25  | 7.84  | 7.88  | 8.11  | 8.04  |
| Down | ENSMUSG000000067274  | -1.09 | 1.53E-36 | Rplp0         | protein_coding | 10.56 | 10.34 | 10.38 | 10.30 | 9.26  | 9.29  | 9.45  | 9.25  |
| Down | ENSMUSG000000032014  | -3.50 | 1.55E-36 | Osf1          | protein_coding | 6.17  | 5.77  | 6.23  | 5.97  | 3.04  | 3.11  | 3.59  | 3.17  |
| Down | ENSMUSG000000017344  | -3.07 | 1.80E-36 | Vtn           | protein_coding | 6.46  | 6.67  | 6.72  | 6.56  | 3.64  | 4.27  | 3.87  | 3.81  |
| Down | ENSMUSG000000026739  | -1.10 | 2.02E-36 | Bmi1          | protein_coding | 9.32  | 9.27  | 9.22  | 9.31  | 8.22  | 7.95  | 8.29  | 8.27  |
| Up   | ENSMUSG000000022747  | 1.45  | 2.27E-36 | St3gal6       | protein_coding | 6.73  | 6.52  | 6.55  | 6.66  | 8.16  | 8.11  | 7.85  | 7.98  |
| Up   | ENSMUSG000000055932  | 1.09  | 2.48E-36 | Fto           | protein_coding | 9.79  | 9.67  | 9.75  | 9.75  | 10.74 | 11.04 | 10.73 | 10.73 |
| Up   | ENSMUSG00000103770   | 1.24  | 2.76E-36 | Pcdha9        | protein_coding | 9.12  | 9.02  | 8.82  | 9.00  | 10.18 | 10.40 | 10.25 | 10.07 |
| Down | ENSMUSG000000028461  | -4.49 | 2.82E-36 | Ccdc107       | protein_coding | 11.17 | 10.86 | 10.83 | 10.80 | 6.24  | 6.87  | 6.15  | 6.60  |
| Down | ENSMUSG000000033965  | -1.91 | 2.89E-36 | Slc16a2       | protein_coding | 7.68  | 7.45  | 7.31  | 7.89  | 5.44  | 5.93  | 5.77  | 5.89  |
| Down | ENSMUSG000000038900  | -1.44 | 3.19E-36 | Rpl12         | protein_coding | 9.89  | 9.75  | 9.73  | 9.92  | 8.25  | 8.33  | 8.52  | 8.44  |
| Up   | ENSMUSG000000027951  | 1.13  | 3.30E-36 | Adar          | protein_coding | 9.36  | 9.44  | 9.27  | 9.14  | 10.48 | 10.58 | 10.37 | 10.26 |
| Up   | ENSMUSG000000007476  | 1.02  | 3.57E-36 | Lrrc8a        | protein_coding | 8.76  | 8.84  | 8.84  | 8.55  | 9.86  | 9.82  | 9.81  | 9.57  |
| Up   | ENSMUSG000000032855  | 1.04  | 3.67E-36 | Pkd1          | protein_coding | 9.07  | 8.75  | 9.01  | 8.79  | 9.89  | 9.96  | 9.91  | 10.00 |
| Up   | ENSMUSG000000037270  | 1.17  | 3.69E-36 | 4932438A13Rik | protein_coding | 9.58  | 9.82  | 9.63  | 9.74  | 10.77 | 10.93 | 10.64 | 11.08 |
| Up   | ENSMUSG000000025189  | 1.01  | 3.94E-36 | Cnm1          | protein_coding | 9.48  | 9.49  | 9.48  | 9.33  | 10.42 | 10.38 | 10.68 | 10.29 |
| Down | ENSMUSG000000038463  | -2.58 | 3.95E-36 | Ofm12b        | protein_coding | 7.67  | 7.28  | 7.63  | 7.50  | 5.37  | 5.04  | 4.40  | 5.23  |
| Up   | ENSMUSG000000033595  | 1.29  | 4.24E-36 | Lg3           | protein_coding | 8.25  | 8.13  | 8.05  | 7.94  | 9.51  | 9.50  | 9.25  | 9.50  |
| Down | ENSMUSG000000050017  | -1.09 | 4.30E-36 | Pitpn         | protein_coding | 9.66  | 9.55  | 9.60  | 9.56  | 8.69  | 8.63  | 8.26  | 8.43  |
| Down | ENSMUSG000000070866  | 1.21  | 4.33E-36 | Zfp804a       | protein_coding | 8.30  | 8.23  | 8.12  | 8.12  | 9.23  | 9.45  | 9.47  | 9.41  |
| Down | ENSMUSG000000061887  | -1.16 | 6.74E-36 | Ssbp3         | protein_coding | 9.70  | 9.63  | 9.53  | 9.59  | 8.71  | 8.43  | 8.12  | 8.52  |
| Up   | ENSMUSG000000027134  | 1.13  | 8.45E-36 | Lpcat4        | protein_coding | 7.88  | 8.03  | 7.90  | 7.88  | 9.01  | 9.17  | 8.99  | 8.86  |
| Down | ENSMUSG000000038642  | -4.25 | 8.48E-36 | Ctss          | protein_coding | 8.66  | 8.59  | 8.02  | 8.06  | 3.64  | 5.17  | 3.83  | 4.41  |
| Down | ENSMUSG000000051504  | -2.81 | 8.61E-36 | Siglech       | protein_coding | 6.80  | 6.38  | 6.53  | 6.60  | 4.10  | 4.60  | 3.35  | 4.08  |
| Down | ENSMUSG000000035686  | -2.01 | 1.00E-35 | Thrsp         | protein_coding | 7.70  | 7.58  | 7.62  | 7.36  | 5.34  | 5.78  | 5.61  | 5.82  |
| Down | ENSMUSG000000031762  | -3.93 | 1.02E-35 | Mt2           | protein_coding | 8.78  | 9.08  | 8.92  | 8.90  | 3.89  | 5.45  | 5.05  | 5.66  |
| Up   | ENSMUSG000000032946  | 1.91  | 1.12E-35 | Rasgrp2       | protein_coding | 5.55  | 5.91  | 5.80  | 5.67  | 7.84  | 7.45  | 7.60  | 7.36  |
| Up   | ENSMUSG000000017943  | 1.18  | 1.19E-35 | Gdap11f       | protein_coding | 8.43  | 8.46  | 8.51  | 8.19  | 9.56  | 9.64  | 9.61  | 9.46  |
| Up   | ENSMUSG000000001380  | 1.02  | 1.19E-35 | Hars          | protein_coding | 8.86  | 8.69  | 8.94  | 8.81  | 9.92  | 9.87  | 9.87  | 9.69  |
| Down | ENSMUSG000000005672  | -2.06 | 1.20E-35 | Kit           | protein_coding | 8.94  | 8.98  | 8.81  | 8.75  | 6.76  | 7.11  | 5.96  | 7.27  |
| Up   | ENSMUSG000000015745  | 1.43  | 1.45E-35 | Plekhf1       | protein_coding | 7.53  | 7.51  | 7.46  | 7.43  | 8.97  | 8.86  | 8.89  | 8.55  |
| Up   | ENSMUSG000000028944  | 1.28  | 1.60E-35 | Abca2         | protein_coding | 10.15 | 9.96  | 10.15 | 9.86  | 11.39 | 11.12 | 11.45 | 11.26 |
| Up   | ENSMUSG000000002010  | 1.02  | 1.88E-35 | ldh3g         | protein_coding | 8.22  | 8.27  | 8.13  | 8.21  | 9.16  | 9.24  | 9.39  | 9.07  |
| Down | ENSMUSG000000043557  | -2.20 | 1.88E-35 | Mdga1         | protein_coding | 9.20  | 8.89  | 8.99  | 8.57  | 6.67  | 6.91  | 6.55  | 6.91  |
| Down | ENSMUSG000000037014  | -1.87 | 2.50E-35 | Sstr4         | protein_coding | 7.75  | 7.33  | 7.56  | 7.21  | 5.49  | 5.64  | 5.76  | 5.86  |
| Down | ENSMUSG000000006435  | -1.08 | 2.84E-35 | Neur1a        | protein_coding | 9.97  | 9.94  | 9.84  | 9.71  | 8.55  | 8.96  | 8.90  | 8.73  |
| Up   | ENSMUSG000000039954  | 1.91  | 3.30E-35 | Slk32a        | protein_coding | 6.03  | 5.49  | 5.83  | 6.19  | 7.73  | 7.82  | 7.80  | 7.63  |
| Down | ENSMUSG000000006882  | -1.48 | 3.31E-35 | Rpl10         | protein_coding | 10.24 | 10.11 | 10.06 | 10.23 | 8.60  | 8.98  | 8.44  | 8.66  |
| Down | ENSMUSG000000028630  | -1.35 | 3.56E-35 | Dyrk2         | protein_coding | 9.15  | 9.28  | 9.10  | 9.10  | 7.92  | 8.12  | 7.92  | 7.45  |
| Down | ENSMUSG000000038855  | -1.69 | 3.57E-35 | ltpkb         | protein_coding | 8.31  | 8.19  | 7.98  | 8.30  | 6.43  | 6.84  | 6.08  | 6.72  |
| Down | ENSMUSG000000020460  | -1.03 | 4.00E-35 | Rps27a        | protein_coding | 10.09 | 10.08 | 10.06 | 10.12 | 9.19  | 8.94  | 9.13  | 9.10  |
| Up   | ENSMUSG00000103800   | 1.26  | 4.19E-35 | Pcdha8        | protein_coding | 9.06  | 8.92  | 8.75  | 8.94  | 10.13 | 10.33 | 10.19 | 10.04 |
| Down | ENSMUSG000000029436  | -1.04 | 4.49E-35 | Mmp17         | protein_coding | 10.19 | 10.15 | 10.08 | 9.81  | 9.10  | 8.98  | 9.11  | 8.94  |
| Down | ENSMUSG000000018008  | -2.97 | 4.70E-35 | Cytl4         | protein_coding | 6.54  | 6.75  | 6.29  | 6.43  | 3.50  | 4.07  | 3.45  | 4.43  |
| Up   | ENSMUSG000000048899  | 1.88  | 4.74E-35 | Rimikla       | protein_coding | 6.54  | 6.56  | 6.20  | 6.50  | 8.03  | 8.37  | 8.61  | 8.09  |
| Up   | ENSMUSG000000000776  | 1.21  | 5.68E-35 | Polr3d        | protein_coding | 7.14  | 7.20  | 7.11  | 6.92  | 8.41  | 8.27  | 8.14  | 8.24  |
| Down | ENSMUSG000000043301  | -1.14 | 5.90E-35 | Kcnj6         | protein_coding | 9.47  | 9.41  | 9.57  | 9.16  | 8.38  | 8.15  | 8.33  | 8.24  |
| Up   | ENSMUSG00000103255   | 1.26  | 8.48E-35 | Pcdhac1       | protein_coding | 9.15  | 8.98  | 8.80  | 8.98  | 10.19 | 10.39 | 10.25 | 10.11 |
| Up   | ENSMUSG000000067925  | 1.32  | 9.26E-35 | Rtl8a         | protein_coding | 6.63  | 6.65  | 6.42  | 6.61  | 7.98  | 7.87  | 7.82  | 7.80  |
| Down | ENSMUSG000000021508  | -3.51 | 9.95E-35 | Cxcl14        | protein_coding | 9.12  | 9.07  | 9.07  | 8.89  | 5.09  | 6.17  | 4.47  | 6.16  |
| Down | ENSMUSG000000090946  | -1.62 | 1.18E-34 | Cdc71l        | protein_coding | 8.13  | 8.21  | 8.08  | 8.09  | 6.29  | 6.24  | 6.91  | 6.66  |
| Up   | ENSMUSG000000007594  | 1.81  | 1.28E-34 | Hapln4        | protein_coding | 8.53  | 8.43  | 8.51  | 8.09  | 10.05 | 10.25 | 10.42 | 10.01 |
| Down | ENSMUSG000000023046  | -3.23 | 1.29E-34 | lftpb6        | protein_coding | 6.16  | 6.02  | 5.68  | 6.15  | 4.03  | 2.85  | 2.93  | 3.44  |
| Down | ENSMUSG000000045991  | -2.32 | 1.40E-34 | Onecut2       | protein_coding | 7.47  | 7.69  | 7.43  | 7.43  | 4.61  | 5.70  | 5.14  | 5.38  |
| Down | ENSMUSG0000000019772 | -4.84 | 1.50E-34 | Vip           | protein_coding | 6.65  | 6.51  | 6.13  | 6.33  | 3.11  | 2.78  | 2.13  | 2.99  |
| Down | ENSMUSG000000022817  | -2.29 | 1.54E-34 | Igfb5         | protein_coding | 8.09  | 8.05  | 7.81  | 7.85  | 6.20  | 5.77  | 4.87  | 5.97  |
| Down | ENSMUSG000000026278  | -2.64 | 1.65E-34 | Bek           | protein_coding | 8.12  | 7.65  | 8.02  | 6.02  | 6.84  | 4.68  | 5.96  | 4.79  |
| Up   | ENSMUSG00000104252   | 1.25  | 2.10E-34 | Pcdha4        | protein_coding | 9.15  | 9.02  | 8.83  | 8.97  | 10.19 | 10.38 | 10.26 | 10.12 |
| Up   | ENSMUSG000000037843  | 1.08  | 2.92E-34 | Vstm2l        | protein_coding | 8.56  | 8.28  | 8.52  | 8.37  | 9.44  | 9.62  | 9.38  | 9.58  |
| Up   | ENSMUSG00000102312   | 1.27  | 3.24E-34 | Pcdha3        | protein_coding | 9.10  | 8.96  | 8.77  | 8.95  | 10.16 | 10.37 | 10.22 | 10.07 |
| Down | ENSMUSG000000038456  | -1.23 | 3.88E-34 | Dennd2a       | protein_coding | 8.61  | 8.28  | 8.47  | 8.40  | 7.24  | 7.24  | 7.35  | 7.35  |
| Down | ENSMUSG000000035295  | -1.22 | 4.23E-34 | Wdr38         | protein_coding | 9.48  | 9.31  | 9.22  | 9.38  | 8.02  | 8.34  | 7.99  | 8.16  |
| Up   | ENSMUSG000000028649  | 1.18  | 4.32E-34 | Macf1         | protein_coding | 11.67 | 11.65 | 11.54 | 11.57 | 12.83 | 12.77 | 12.50 | 13.00 |
| Down | ENSMUSG000000021662  | -1.13 | 4.84E-34 | Arhgef28      | protein_coding | 9.20  | 9.07  | 9.29  | 9.04  | 8.00  | 7.94  | 8.04  | 8.14  |
| Down | ENSMUSG000000036478  | -1.04 | 6.07E-34 | Btg1          | protein_coding | 8.19  | 8.20  | 8.02  | 8.00  | 7.07  | 7.16  | 7.11  | 7.00  |
| Down | ENSMUSG000000053062  | -2.09 | 6.15E-34 | Jam2          | protein_coding | 7.50  | 7.54  | 7.55  | 7.74  | 5.42  | 5.85  | 5.07  | 5.86  |
| Up   | ENSMUSG000000029547  | 1.06  | 6.57E-34 | Ints1         | protein_coding | 8.26  | 8.24  | 8.21  | 8.29  | 9.41  | 9.26  | 9.26  | 9.26  |
| Up   | ENSMUSG000000025757  | 1.04  | 7.77E-34 | Hspa4l        | protein_coding | 10.30 | 10.40 | 9.92  | 10.07 | 11.29 | 11.34 | 11.19 | 11.07 |
| Down | ENSMUSG000000022696  | -1.20 | 8.81E-34 | Sldt1         | protein_coding | 8.37  | 8.20  | 8.25  | 8.11  | 6.91  | 7.25  | 6.86  | 7.18  |
| Up   | ENSMUSG000000001334  | 1.10  | 8.95E-34 | Fndc5         | protein_coding | 9.25  | 9.25  | 9.30  | 9.11  | 10.36 | 10.45 | 10.37 | 10.09 |
| Up   | ENSMUSG000000024059  | 1     |          |               |                |       |       |       |       |       |       |       |       |

|      |                     |        |          |           |                |       |       |       |       |       |       |       |       |
|------|---------------------|--------|----------|-----------|----------------|-------|-------|-------|-------|-------|-------|-------|-------|
| Up   | ENSMUSG00000035629  | 1.07   | 1.06E-33 | Rubcn     | protein_coding | 8.71  | 8.75  | 8.66  | 8.80  | 9.93  | 9.87  | 9.66  | 9.71  |
| Down | ENSMUSG00000036560  | -2.76  | 1.25E-33 | Lgi4      | protein_coding | 7.04  | 7.10  | 6.84  | 7.03  | 4.63  | 4.99  | 3.50  | 4.41  |
| Up   | ENSMUSG00000043940  | 1.03   | 1.46E-33 | Wdfy3     | protein_coding | 10.88 | 10.81 | 10.73 | 10.72 | 11.84 | 11.75 | 11.85 | 11.82 |
| Up   | ENSMUSG000000032452 | 1.07   | 1.48E-33 | C12n2     | protein_coding | 9.47  | 9.54  | 9.69  | 9.27  | 10.65 | 10.44 | 10.68 | 10.49 |
| Up   | ENSMUSG000000115293 | 1.70   | 1.50E-33 | Gm49333   | protein_coding | 6.72  | 6.80  | 6.70  | 7.10  | 8.48  | 8.55  | 8.48  | 8.43  |
| Up   | ENSMUSG000000038990 | 1.27   | 1.54E-33 | Cables2   | protein_coding | 8.02  | 7.85  | 8.09  | 7.80  | 9.01  | 9.21  | 9.46  | 9.07  |
| Down | ENSMUSG000000030657 | -1.03  | 1.54E-33 | Xylt1     | protein_coding | 9.09  | 9.13  | 9.09  | 9.13  | 8.03  | 8.24  | 8.20  | 7.86  |
| Up   | ENSMUSG000000040964 | 1.33   | 1.62E-33 | Arhgef10l | protein_coding | 7.69  | 7.63  | 7.63  | 7.84  | 8.75  | 8.84  | 9.22  | 8.94  |
| Down | ENSMUSG000000053110 | -2.73  | 1.63E-33 | Yap1      | protein_coding | 7.15  | 7.04  | 6.66  | 7.26  | 3.77  | 4.74  | 4.24  | 5.06  |
| Down | ENSMUSG000000015224 | -2.13  | 1.70E-33 | Cyp2j9    | protein_coding | 6.91  | 6.95  | 6.83  | 6.49  | 4.22  | 4.87  | 4.97  | 5.13  |
| Down | ENSMUSG00000010663  | -1.05  | 1.87E-33 | Fads1     | protein_coding | 9.70  | 9.55  | 9.63  | 9.53  | 8.63  | 8.46  | 8.52  | 8.65  |
| Up   | ENSMUSG000000039579 | 1.40   | 1.96E-33 | Grin3a    | protein_coding | 8.18  | 8.52  | 8.24  | 8.74  | 9.78  | 10.07 | 9.62  | 9.79  |
| Down | ENSMUSG000000044912 | -1.34  | 2.16E-33 | Syt16     | protein_coding | 8.93  | 9.17  | 8.91  | 8.97  | 7.49  | 7.87  | 7.36  | 7.91  |
| Down | ENSMUSG000000062328 | -1.33  | 2.21E-33 | Rpl17     | protein_coding | 10.44 | 10.37 | 10.37 | 10.37 | 9.03  | 9.18  | 9.22  | 8.97  |
| Down | ENSMUSG000000062997 | -1.19  | 2.31E-33 | Rpl35     | protein_coding | 9.82  | 9.68  | 9.62  | 9.74  | 8.36  | 8.77  | 8.45  | 8.51  |
| Up   | ENSMUSG000000024887 | 1.57   | 2.58E-33 | Asah2     | protein_coding | 6.57  | 6.99  | 6.92  | 6.96  | 8.53  | 8.26  | 8.48  | 8.35  |
| Down | ENSMUSG000000029638 | -1.08  | 2.84E-33 | Glccl1    | protein_coding | 9.58  | 9.47  | 9.45  | 9.49  | 8.47  | 8.65  | 8.06  | 8.46  |
| Up   | ENSMUSG000000009090 | 1.07   | 3.07E-33 | Ap1b1     | protein_coding | 9.46  | 9.37  | 9.46  | 9.30  | 10.56 | 10.44 | 10.55 | 10.30 |
| Up   | ENSMUSG000000033460 | 1.09   | 3.10E-33 | Armcx1    | protein_coding | 8.48  | 8.51  | 8.42  | 8.58  | 9.35  | 9.80  | 9.62  | 9.51  |
| Down | ENSMUSG000000002891 | -1.38  | 4.09E-33 | Nab1      | protein_coding | 9.14  | 9.19  | 9.21  | 9.42  | 7.70  | 7.55  | 7.72  | 8.17  |
| Up   | ENSMUSG000000022270 | -1.24  | 4.29E-33 | Retreg1   | protein_coding | 7.81  | 7.95  | 7.86  | 7.72  | 9.19  | 8.97  | 9.10  | 8.98  |
| Down | ENSMUSG000000022246 | -1.96  | 4.74E-33 | Rai14     | protein_coding | 6.67  | 6.86  | 6.47  | 6.90  | 4.59  | 5.02  | 5.10  | 4.92  |
| Down | ENSMUSG000000020101 | -2.86  | 4.78E-33 | Vsir      | protein_coding | 6.65  | 6.82  | 6.64  | 6.54  | 4.42  | 3.17  | 4.35  | 4.22  |
| Down | ENSMUSG000000033060 | -1.67  | 5.37E-33 | Lmo7      | protein_coding | 9.30  | 8.96  | 9.30  | 9.00  | 6.94  | 7.66  | 7.53  | 7.75  |
| Up   | ENSMUSG000000049796 | 2.68   | 5.57E-33 | Crh       | protein_coding | 3.99  | 4.56  | 4.70  | 3.94  | 6.78  | 6.77  | 6.88  | 6.55  |
| Up   | ENSMUSG000000031708 | 1.17   | 5.58E-33 | Tecr      | protein_coding | 9.73  | 9.80  | 9.68  | 9.78  | 10.91 | 11.07 | 10.93 | 10.72 |
| Up   | ENSMUSG000000009292 | 1.57   | 7.39E-33 | Trpm2     | protein_coding | 7.40  | 7.67  | 7.21  | 7.41  | 8.98  | 9.03  | 8.95  | 8.94  |
| Up   | ENSMUSG000000028051 | 1.97   | 9.87E-33 | Hcn3      | protein_coding | 5.85  | 6.42  | 5.80  | 6.10  | 7.78  | 8.23  | 7.87  | 7.94  |
| Up   | ENSMUSG000000020176 | 1.35   | 9.88E-33 | Grb10     | protein_coding | 7.41  | 7.54  | 7.27  | 7.90  | 9.00  | 8.87  | 8.84  | 8.81  |
| Up   | ENSMUSG000000007877 | 4.15   | 1.02E-32 | Tcap      | protein_coding | 3.25  | 2.43  | 3.43  | 3.15  | 6.18  | 6.44  | 6.73  | 6.31  |
| Down | ENSMUSG000000034040 | -1.42  | 1.05E-32 | Galt17    | protein_coding | 9.85  | 9.80  | 9.99  | 9.51  | 8.49  | 8.15  | 8.74  | 8.60  |
| Down | ENSMUSG000000031342 | -1.38  | 1.09E-32 | Gpm6b     | protein_coding | 11.60 | 11.66 | 11.65 | 11.70 | 10.62 | 9.99  | 9.97  | 10.42 |
| Down | ENSMUSG000000003241 | -1.01  | 1.14E-32 | Rasa2     | protein_coding | 8.35  | 8.26  | 8.23  | 8.46  | 7.27  | 7.49  | 7.34  | 7.47  |
| Up   | ENSMUSG000000021270 | -1.20  | 1.19E-32 | Hsp90aa1  | protein_coding | 12.34 | 12.28 | 12.28 | 12.00 | 13.55 | 13.22 | 13.32 | 13.17 |
| Down | ENSMUSG000000045128 | -1.19  | 1.20E-32 | Rpl18a    | protein_coding | 10.85 | 10.80 | 10.75 | 10.81 | 9.69  | 9.56  | 9.73  | 9.49  |
| Up   | ENSMUSG000000031367 | 1.37   | 1.31E-32 | Ap1s2     | protein_coding | 8.22  | 8.25  | 8.22  | 7.97  | 8.49  | 9.57  | 9.71  | 9.48  |
| Up   | ENSMUSG000000056222 | 1.14   | 1.31E-32 | Spock1    | protein_coding | 10.32 | 10.25 | 10.27 | 10.20 | 11.38 | 11.36 | 11.63 | 11.18 |
| Up   | ENSMUSG000000035969 | 1.11   | 1.33E-32 | Rusc2     | protein_coding | 9.08  | 9.07  | 8.82  | 8.73  | 10.01 | 9.92  | 10.25 | 9.94  |
| Down | ENSMUSG000000019990 | -1.52  | 1.35E-32 | Pde7b     | protein_coding | 7.24  | 7.59  | 7.38  | 7.54  | 5.94  | 6.15  | 5.49  | 6.24  |
| Down | ENSMUSG000000061143 | -2.01  | 1.37E-32 | Maml3     | protein_coding | 7.80  | 7.42  | 7.79  | 7.24  | 6.11  | 5.48  | 5.64  | 5.28  |
| Down | ENSMUSG000000051497 | -2.31  | 1.45E-32 | Kcnj16    | protein_coding | 6.95  | 7.18  | 6.93  | 7.35  | 4.19  | 4.90  | 5.02  | 5.46  |
| Up   | ENSMUSG000000028584 | 3.28   | 1.58E-32 | Lrrc38    | protein_coding | 4.39  | 3.63  | 3.80  | 3.90  | 7.04  | 6.56  | 7.00  | 6.81  |
| Up   | ENSMUSG000000022842 | 1.68   | 1.85E-32 | Ece2      | protein_coding | 6.70  | 6.85  | 6.70  | 7.14  | 8.57  | 8.55  | 8.49  | 8.42  |
| Down | ENSMUSG000000079657 | -1.67  | 1.85E-32 | Rab26     | protein_coding | 7.31  | 7.36  | 7.35  | 7.32  | 6.18  | 5.62  | 5.47  | 5.57  |
| Up   | ENSMUSG000000043857 | 1.31   | 1.87E-32 | Mgat5b    | protein_coding | 8.21  | 8.34  | 8.06  | 8.12  | 9.49  | 9.38  | 9.75  | 9.26  |
| Down | ENSMUSG000000036905 | -3.95  | 1.94E-32 | C1qb      | protein_coding | 7.78  | 7.37  | 6.80  | 6.86  | 4.19  | 3.94  | 3.50  | 3.29  |
| Down | ENSMUSG000000027009 | -1.75  | 2.18E-32 | Ihga4     | protein_coding | 8.95  | 8.28  | 8.32  | 6.32  | 6.59  | 6.41  | 6.59  | 6.30  |
| Up   | ENSMUSG000000021005 | 1.56   | 2.19E-32 | Slc39a13  | protein_coding | 6.82  | 6.61  | 6.77  | 6.73  | 8.04  | 8.49  | 8.22  | 8.23  |
| Up   | ENSMUSG000000028559 | 1.08   | 2.28E-32 | Osbpl9    | protein_coding | 8.19  | 8.17  | 7.96  | 8.24  | 9.19  | 9.28  | 9.29  | 9.08  |
| Down | ENSMUSG000000085925 | -2.03  | 2.31E-32 | Rtl1      | protein_coding | 6.37  | 6.45  | 6.70  | 6.71  | 4.66  | 3.84  | 5.08  | 4.98  |
| Down | ENSMUSG000000020734 | -1.73  | 2.39E-32 | Grin2c    | protein_coding | 7.39  | 7.27  | 7.68  | 7.38  | 6.05  | 5.77  | 5.86  | 5.41  |
| Down | ENSMUSG000000050896 | -3.78  | 2.55E-32 | Rtn4r2    | protein_coding | 7.73  | 7.67  | 7.73  | 7.52  | 4.56  | 4.40  | 2.54  | 4.55  |
| Up   | ENSMUSG000000024991 | 1.93   | 2.63E-32 | Eif3a     | protein_coding | 10.49 | 10.38 | 10.51 | 10.43 | 12.48 | 12.31 | 12.39 | 12.33 |
| Down | ENSMUSG000000049044 | -1.15  | 2.75E-32 | Rapgef4   | protein_coding | 12.24 | 12.07 | 12.13 | 12.08 | 10.88 | 11.11 | 11.12 | 10.76 |
| Down | ENSMUSG000000029135 | -1.56  | 3.22E-32 | Fosl2     | protein_coding | 9.10  | 9.04  | 8.91  | 8.84  | 7.56  | 7.46  | 7.40  | 7.32  |
| Down | ENSMUSG000000033726 | -3.62  | 3.47E-32 | Emx1      | protein_coding | 5.70  | 6.25  | 6.20  | 5.94  | 2.57  | 3.77  | 3.54  | 2.24  |
| Up   | ENSMUSG000000046997 | 2.48   | 3.51E-32 | Spsb4     | protein_coding | 4.62  | 4.84  | 4.43  | 7.08  | 4.91  | 6.67  | 7.14  | 7.05  |
| Down | ENSMUSG000000041695 | -1.61  | 4.19E-32 | Kcnj2     | protein_coding | 7.14  | 7.23  | 7.05  | 7.06  | 5.91  | 5.18  | 5.45  | 5.96  |
| Up   | ENSMUSG000000029560 | 2.13   | 4.90E-32 | Smx8      | protein_coding | 5.10  | 5.10  | 5.67  | 5.72  | 7.15  | 7.49  | 7.54  | 7.61  |
| Down | ENSMUSG000000031596 | -1.83  | 5.23E-32 | Slc7a2    | protein_coding | 6.97  | 7.20  | 7.15  | 7.37  | 5.17  | 5.41  | 5.13  | 5.92  |
| Up   | ENSMUSG000000024413 | 1.00   | 5.43E-32 | Npc1      | protein_coding | 7.99  | 7.89  | 8.02  | 7.71  | 8.96  | 8.83  | 8.93  | 8.83  |
| Up   | ENSMUSG000000028464 | 2.47   | 5.85E-32 | Tpm2      | protein_coding | 5.06  | 4.93  | 4.78  | 4.96  | 7.46  | 7.36  | 6.92  | 7.19  |
| Up   | ENSMUSG000000038267 | 1.06   | 5.96E-32 | Slc22a23  | protein_coding | 8.53  | 8.32  | 8.47  | 8.28  | 9.39  | 9.42  | 9.64  | 9.35  |
| Down | ENSMUSG000000033953 | -1.03  | 6.16E-32 | Ppp3r1    | protein_coding | 12.58 | 12.46 | 12.52 | 12.39 | 11.40 | 11.61 | 11.38 | 11.43 |
| Up   | ENSMUSG000000083282 | 1.28   | 6.34E-32 | Ctcf      | protein_coding | 7.08  | 6.90  | 7.07  | 6.96  | 8.27  | 8.12  | 8.33  | 8.30  |
| Up   | ENSMUSG000000003500 | 1.22   | 7.12E-32 | Impdh1    | protein_coding | 7.60  | 7.49  | 7.45  | 7.29  | 8.78  | 8.70  | 8.74  | 8.38  |
| Down | ENSMUSG000000054477 | -1.02  | 7.72E-32 | Kenn2     | protein_coding | 8.85  | 9.02  | 9.02  | 8.71  | 7.87  | 8.05  | 7.93  | 7.74  |
| Up   | ENSMUSG000000026792 | 1.66   | 8.32E-32 | Lrsam1    | protein_coding | 7.09  | 7.27  | 7.01  | 6.93  | 8.95  | 8.50  | 8.73  | 8.62  |
| Up   | ENSMUSG000000050947 | 1.05   | 9.37E-32 | Amigo1    | protein_coding | 9.14  | 9.16  | 9.09  | 8.94  | 10.21 | 10.18 | 10.10 | 9.99  |
| Up   | ENSMUSG000000024777 | 1.01   | 9.73E-32 | Ppp2r5b   | protein_coding | 9.28  | 9.38  | 9.38  | 9.20  | 10.24 | 10.24 | 10.41 | 10.21 |
| Down | ENSMUSG000000021133 | -1.26  | 1.16E-31 | Susd6     | protein_coding | 9.13  | 8.99  | 9.03  | 8.87  | 7.99  | 7.48  | 7.74  | 7.74  |
| Down | ENSMUSG000000022336 | -1.02  | 1.25E-31 | Eif9e     | protein_coding | 9.29  | 9.26  | 9.19  | 9.35  | 8.15  | 8.15  | 8.45  | 8.16  |
| Down | ENSMUSG000000031557 | -2.43  | 1.29E-31 | Plkha2    | protein_coding | 7.95  | 8.22  | 8.33  | 4.66  | 6.22  | 6.09  | 6.21  | 6.21  |
| Down | ENSMUSG000000045114 | -1.32  | 1.95E-31 | Prr3      | protein_coding | 9.96  | 9.97  | 10.11 | 9.80  | 8.37  | 8.62  | 8.68  | 8.68  |
| Down | ENSMUSG000000115302 | -3.25  | 2.21E-31 | Gm49394   | protein_coding | 8.63  | 8.16  | 8.11  | 9.46  | 5.88  | 5.00  | 5.47  | 5.75  |
| Up   | ENSMUSG000000056900 | 1.07   | 2.24E-31 | Usp13     | protein_coding | 7.80  | 7.83  | 7.39  | 7.51  | 8.83  | 8.69  | 8.66  | 8.63  |
| Down | ENSMUSG000000039706 | -1.91  | 2.35E-31 | Ldb2      | protein_coding | 8.14  | 8.64  | 8.34  | 8.46  | 6.29  | 6.89  | 5.86  | 6.87  |
| Down | ENSMUSG000000050248 | -1.31  | 2.68E-31 | Evc2      | protein_coding | 7.93  | 7.86  | 8.06  | 7.77  | 6.76  | 6.80  | 6.38  | 6.57  |
| Up   | ENSMUSG000000020919 | 1.46   | 2.90E-31 | Stat5b    | protein_coding | 7.09  | 6.82  | 7.14  | 8.41  | 8.19  | 8.19  | 8.68  | 8.31  |
| Down | ENSMUSG000000048978 | -1.04  | 3.94E-31 | Nrsn1     | protein_coding | 11.05 | 11.12 | 11.07 | 11.05 | 10.01 | 10.17 | 10.14 | 9.80  |
| Up   | ENSMUSG000000075702 | 1.13   | 4.06E-31 | Selenom   | protein_coding | 8.35  | 8.14  | 8.47  | 9.59  | 9.39  | 9.32  | 9.41  | 9.37  |
| Up   | ENSMUSG00000016552  | 1.80   | 4.07E-31 | Foxrd2    | protein_coding | 6.36  | 6.56  | 6.27  | 6.32  | 7.98  | 8.13  | 8.55  | 7.76  |
| Down | ENSMUSG000000052430 | -2.76  | 4.21E-31 | Bmpr1b    | protein_coding | 7.43  | 7.51  | 7.62  | 7.62  | 5.30  | 5.25  | 3.40  | 5.21  |
| Down | ENSMUSG000000030123 | -1.68  | 4.94E-31 | Ptxnd1    | protein_coding | 7.39  | 7.51  | 7.14  | 7.47  | 5.61  | 5.89  | 5.23  | 6.20  |
| Down | ENSMUSG000000041907 | -1.84  | 5.02E-31 | Gpr45     | protein_coding | 6.88  | 7.24  | 7.24  | 7.31  | 5.23  | 5.48  | 5.31  | 5.88  |
| Up   | ENSMUSG000000020836 | 2.47   | 5.73E-31 | Coro6     | protein_coding | 5.44  | 5.66  | 5.37  | 5.28  | 7.82  | 7.50  | 8.11  | 7.68  |
| Up   | ENSMUSG000000039119 | 1.93</ |          |           |                |       |       |       |       |       |       |       |       |

|      |                     |       |          |          |                |       |       |       |       |       |       |       |       |
|------|---------------------|-------|----------|----------|----------------|-------|-------|-------|-------|-------|-------|-------|-------|
| Down | ENSMUSG00000031821  | -1.15 | 8.86E-31 | Gins2    | protein_coding | 8.33  | 8.32  | 8.37  | 8.09  | 7.18  | 7.02  | 7.11  | 7.27  |
| Up   | ENSMUSG00000019087  | 1.02  | 8.88E-31 | Atp6ap1  | protein_coding | 9.42  | 9.44  | 9.39  | 9.38  | 10.36 | 10.52 | 10.53 | 10.25 |
| Down | ENSMUSG00000030876  | -1.00 | 8.88E-31 | Mettl9   | protein_coding | 9.15  | 9.03  | 9.12  | 9.11  | 8.26  | 7.79  | 8.17  | 8.20  |
| Down | ENSMUSG000000048583 | -3.26 | 9.83E-31 | Igf2     | protein_coding | 8.94  | 8.41  | 8.25  | 9.84  | 6.02  | 5.31  | 5.50  | 6.06  |
| Down | ENSMUSG000000036353 | -5.03 | 1.16E-30 | Pzry12   | protein_coding | 6.73  | 6.43  | 6.86  | 7.09  | 2.57  | 2.44  | 2.00  | 3.78  |
| Up   | ENSMUSG000000066357 | 1.23  | 1.22E-30 | Wdr6     | protein_coding | 8.26  | 8.21  | 8.37  | 8.52  | 9.29  | 9.56  | 9.64  | 9.74  |
| Down | ENSMUSG00000001767  | -1.07 | 1.25E-30 | Kat5b    | protein_coding | 10.39 | 10.05 | 10.09 | 10.05 | 10.01 | 10.01 | 10.01 | 9.97  |
| Down | ENSMUSG000000058498 | -4.01 | 1.39E-30 | Fcgr3    | protein_coding | 6.78  | 6.73  | 6.99  | 6.12  | 3.60  | 2.00  | 3.45  | 3.29  |
| Up   | ENSMUSG000000021266 | 1.26  | 1.44E-30 | Wars     | protein_coding | 8.06  | 8.30  | 8.16  | 7.89  | 9.52  | 9.30  | 9.51  | 9.06  |
| Down | ENSMUSG000000054934 | -1.74 | 1.48E-30 | Kcnmb4   | protein_coding | 8.86  | 8.97  | 9.09  | 8.83  | 7.56  | 6.88  | 7.54  | 6.74  |
| Up   | ENSMUSG000000021214 | 3.44  | 1.56E-30 | Akr1c18  | protein_coding | 4.45  | 4.20  | 3.60  | 4.22  | 7.44  | 7.24  | 7.25  | 7.06  |
| Down | ENSMUSG000000052726 | -1.70 | 1.73E-30 | Kcnt2    | protein_coding | 8.32  | 8.35  | 8.21  | 8.36  | 5.96  | 6.82  | 7.00  | 6.63  |
| Up   | ENSMUSG000000053693 | 1.09  | 1.76E-30 | Mast1    | protein_coding | 9.06  | 8.93  | 9.06  | 8.94  | 10.05 | 10.23 | 10.05 | 9.99  |
| Up   | ENSMUSG000000020019 | 2.15  | 1.90E-30 | Ntn4     | protein_coding | 5.65  | 5.60  | 5.31  | 5.53  | 7.44  | 7.99  | 7.30  | 7.47  |
| Down | ENSMUSG000000033308 | -2.08 | 1.90E-30 | Dpyd     | protein_coding | 6.54  | 6.74  | 6.52  | 6.89  | 4.00  | 4.74  | 4.95  | 5.15  |
| Down | ENSMUSG000000080316 | -2.97 | 1.92E-30 | Spaca6   | protein_coding | 6.94  | 7.19  | 7.44  | 7.35  | 4.28  | 4.19  | 4.87  | 4.59  |
| Down | ENSMUSG000000043671 | -1.02 | 2.31E-30 | Dpy19l3  | protein_coding | 8.58  | 8.50  | 8.55  | 8.39  | 7.59  | 7.56  | 7.28  | 7.56  |
| Down | ENSMUSG000000054675 | -3.96 | 2.35E-30 | Tmem119  | protein_coding | 6.21  | 5.87  | 6.21  | 6.07  | 2.13  | 2.98  | 3.71  | 2.62  |
| Up   | ENSMUSG000000032101 | 1.46  | 2.51E-30 | Ddx25    | protein_coding | 8.29  | 8.38  | 8.38  | 8.28  | 9.89  | 9.73  | 9.88  | 9.60  |
| Down | ENSMUSG000000052397 | -1.85 | 2.99E-30 | Ezr      | protein_coding | 8.15  | 7.91  | 7.73  | 7.97  | 5.76  | 5.73  | 6.33  | 6.60  |
| Up   | ENSMUSG000000021477 | 1.24  | 3.20E-30 | Ctst     | protein_coding | 8.21  | 7.71  | 7.83  | 9.23  | 8.15  | 9.29  | 8.93  | 9.29  |
| Down | ENSMUSG000000040972 | -1.58 | 3.88E-30 | Igfb2    | protein_coding | 7.49  | 7.71  | 7.62  | 7.69  | 5.84  | 5.96  | 6.17  | 6.41  |
| Down | ENSMUSG000000040479 | -1.04 | 3.88E-30 | Dgkz     | protein_coding | 11.44 | 11.19 | 11.59 | 11.22 | 10.43 | 10.35 | 10.31 | 10.25 |
| Up   | ENSMUSG000000047344 | 2.77  | 4.74E-30 | Lanc13   | protein_coding | 5.15  | 5.63  | 6.03  | 5.24  | 8.04  | 8.53  | 8.12  | 8.14  |
| Down | ENSMUSG000000091387 | -3.20 | 5.36E-30 | Gcnt4    | protein_coding | 5.94  | 5.91  | 6.12  | 5.53  | 3.23  | 3.87  | 2.63  | 3.29  |
| Up   | ENSMUSG000000042817 | 1.59  | 6.05E-30 | Flt3     | protein_coding | 5.54  | 6.05  | 5.94  | 5.81  | 7.45  | 7.34  | 7.47  | 7.21  |
| Down | ENSMUSG000000020614 | -2.05 | 6.26E-30 | Fam20a   | protein_coding | 6.39  | 6.36  | 6.21  | 6.09  | 4.68  | 4.54  | 3.97  | 4.46  |
| Down | ENSMUSG000000050721 | -1.94 | 6.82E-30 | Plekho2  | protein_coding | 6.85  | 6.69  | 6.61  | 6.77  | 4.59  | 5.21  | 4.83  | 5.05  |
| Down | ENSMUSG000000029687 | -2.25 | 7.40E-30 | Ezh2     | protein_coding | 7.37  | 7.43  | 7.19  | 7.21  | 5.25  | 4.64  | 4.87  | 5.75  |
| Up   | ENSMUSG000000020802 | 1.20  | 8.68E-30 | Ube2o    | protein_coding | 8.86  | 8.87  | 8.83  | 8.76  | 10.12 | 10.05 | 10.14 | 9.87  |
| Down | ENSMUSG000000071337 | -1.12 | 9.40E-30 | Tia1     | protein_coding | 8.19  | 8.39  | 8.94  | 8.44  | 7.15  | 7.42  | 7.23  | 7.37  |
| Up   | ENSMUSG000000052337 | 1.03  | 1.20E-29 | Irmr     | protein_coding | 9.06  | 9.14  | 8.93  | 8.88  | 10.13 | 9.93  | 10.14 | 9.91  |
| Down | ENSMUSG000000033594 | -1.22 | 1.20E-29 | Spata2   | protein_coding | 7.70  | 7.92  | 7.79  | 6.62  | 6.76  | 6.24  | 6.63  | 6.60  |
| Down | ENSMUSG000000007656 | -1.22 | 1.29E-29 | Arpp19   | protein_coding | 9.50  | 9.62  | 9.28  | 9.55  | 8.20  | 8.55  | 8.14  | 8.24  |
| Up   | ENSMUSG000000047250 | 1.87  | 1.29E-29 | Ptgs1    | protein_coding | 5.57  | 5.89  | 5.73  | 5.70  | 7.41  | 7.68  | 7.75  | 7.14  |
| Down | ENSMUSG000000024286 | -1.03 | 1.29E-29 | Ccny     | protein_coding | 10.34 | 10.21 | 10.28 | 10.32 | 9.04  | 9.42  | 9.20  | 9.37  |
| Down | ENSMUSG000000024899 | -2.94 | 1.31E-29 | Paps2    | protein_coding | 6.81  | 6.48  | 6.35  | 6.62  | 3.29  | 3.56  | 4.59  | 4.17  |
| Down | ENSMUSG000000089922 | -1.14 | 1.63E-29 | Gm43517  | protein_coding | 8.67  | 8.77  | 8.77  | 8.42  | 7.75  | 7.75  | 7.24  | 7.58  |
| Down | ENSMUSG000000025608 | -2.36 | 1.64E-29 | Podxl    | protein_coding | 6.44  | 6.45  | 6.51  | 6.37  | 4.63  | 3.91  | 3.67  | 4.81  |
| Up   | ENSMUSG000000025089 | 1.07  | 1.71E-29 | Gfra1    | protein_coding | 8.20  | 8.04  | 8.29  | 8.19  | 9.11  | 9.44  | 9.34  | 9.06  |
| Down | ENSMUSG000000020096 | -4.13 | 2.23E-29 | Tbata    | protein_coding | 6.14  | 5.72  | 5.74  | 5.48  | 2.90  | 2.34  | 2.00  | 3.48  |
| Down | ENSMUSG000000022773 | -1.97 | 2.23E-29 | Ypel1    | protein_coding | 7.85  | 7.85  | 7.61  | 7.89  | 5.09  | 5.91  | 6.24  | 6.14  |
| Up   | ENSMUSG000000047434 | 1.22  | 2.50E-29 | Xyyl1    | protein_coding | 7.45  | 7.32  | 7.29  | 7.33  | 8.36  | 8.72  | 8.58  | 8.51  |
| Up   | ENSMUSG000000056296 | 1.01  | 2.77E-29 | Synpr    | protein_coding | 8.52  | 8.71  | 8.68  | 8.61  | 9.53  | 9.62  | 9.76  | 9.63  |
| Up   | ENSMUSG000000043822 | 2.34  | 2.78E-29 | Adamts15 | protein_coding | 5.34  | 5.35  | 4.43  | 5.04  | 7.28  | 7.40  | 7.43  | 7.00  |
| Down | ENSMUSG000000041308 | -1.35 | 2.86E-29 | Sntb2    | protein_coding | 8.60  | 8.39  | 8.58  | 8.54  | 7.44  | 7.31  | 6.77  | 7.20  |
| Down | ENSMUSG000000046384 | -1.32 | 2.99E-29 | Rpl27a   | protein_coding | 10.26 | 10.08 | 10.16 | 10.16 | 8.88  | 9.11  | 8.80  | 8.80  |
| Down | ENSMUSG000000032373 | -2.70 | 3.48E-29 | Car12    | protein_coding | 7.07  | 6.50  | 6.91  | 7.58  | 4.82  | 4.61  | 5.05  | 4.61  |
| Down | ENSMUSG000000020251 | -2.97 | 3.73E-29 | Gli8d2   | protein_coding | 5.73  | 6.37  | 6.20  | 6.27  | 2.57  | 4.27  | 3.50  | 3.70  |
| Up   | ENSMUSG000000031139 | 2.10  | 4.57E-29 | Mcf2     | protein_coding | 5.23  | 4.79  | 5.45  | 5.41  | 7.26  | 7.33  | 7.37  | 6.90  |
| Up   | ENSMUSG000000034863 | 1.38  | 5.05E-29 | Ano8     | protein_coding | 7.50  | 7.01  | 7.36  | 7.38  | 8.68  | 8.73  | 8.92  | 8.32  |
| Up   | ENSMUSG000000027384 | 1.13  | 5.10E-29 | Ndufa5   | protein_coding | 7.60  | 7.51  | 7.55  | 7.26  | 8.61  | 8.66  | 8.58  | 8.53  |
| Down | ENSMUSG000000026626 | -1.12 | 5.12E-29 | Ppp2r5a  | protein_coding | 9.30  | 9.21  | 8.98  | 9.13  | 8.04  | 7.82  | 8.12  | 8.22  |
| Down | ENSMUSG000000052135 | -2.72 | 5.43E-29 | Foxo6    | protein_coding | 7.17  | 6.92  | 7.03  | 6.77  | 4.80  | 4.72  | 3.19  | 4.74  |
| Down | ENSMUSG000000020173 | -1.55 | 5.55E-29 | Cobl     | protein_coding | 8.61  | 8.62  | 8.60  | 7.21  | 6.55  | 7.03  | 7.07  | 7.07  |
| Down | ENSMUSG000000040721 | -1.14 | 5.56E-29 | Zfhx2    | protein_coding | 10.24 | 10.07 | 10.20 | 9.93  | 8.91  | 9.29  | 8.65  | 9.00  |
| Down | ENSMUSG000000048410 | -1.07 | 5.74E-29 | Zfp407   | protein_coding | 8.48  | 8.33  | 8.19  | 7.18  | 8.16  | 7.30  | 7.22  | 7.20  |
| Up   | ENSMUSG000000025613 | 1.06  | 5.92E-29 | Ccl8     | protein_coding | 9.02  | 9.12  | 8.92  | 9.06  | 10.06 | 10.25 | 10.01 | 10.00 |
| Down | ENSMUSG000000048148 | -1.59 | 6.11E-29 | Nwd1     | protein_coding | 8.99  | 8.73  | 8.67  | 8.69  | 7.29  | 7.10  | 6.76  | 7.58  |
| Down | ENSMUSG000000047446 | -1.30 | 6.33E-29 | Arl4a    | protein_coding | 8.28  | 8.42  | 8.18  | 8.55  | 6.92  | 6.91  | 6.97  | 7.47  |
| Down | ENSMUSG000000068315 | -2.87 | 6.91E-29 | Cyp26b1  | protein_coding | 6.42  | 6.27  | 6.96  | 6.33  | 4.56  | 4.07  | 3.71  | 3.44  |
| Down | ENSMUSG000000049517 | -1.05 | 7.45E-29 | Rps23    | protein_coding | 11.31 | 11.14 | 11.14 | 11.20 | 10.05 | 10.14 | 10.11 | 10.26 |
| Down | ENSMUSG000000060002 | -1.24 | 8.29E-29 | Chpt1    | protein_coding | 8.86  | 8.93  | 8.74  | 8.91  | 7.34  | 7.74  | 7.61  | 7.80  |
| Down | ENSMUSG000000036402 | -1.80 | 8.61E-29 | Gng12    | protein_coding | 9.18  | 9.26  | 9.13  | 9.17  | 7.80  | 6.72  | 7.19  | 7.67  |
| Up   | ENSMUSG000000096054 | 1.02  | 8.81E-29 | Syne1    | protein_coding | 12.44 | 12.34 | 12.31 | 12.25 | 13.32 | 13.30 | 13.18 | 13.60 |
| Up   | ENSMUSG000000025151 | 1.03  | 9.86E-29 | Maged1   | protein_coding | 10.56 | 10.52 | 10.52 | 10.39 | 11.44 | 11.66 | 11.57 | 11.43 |
| Up   | ENSMUSG00000001053  | 1.77  | 1.06E-28 | N4bp3    | protein_coding | 6.13  | 6.28  | 6.35  | 6.55  | 8.14  | 7.88  | 8.29  | 7.87  |
| Up   | ENSMUSG000000018339 | 2.08  | 1.09E-28 | Gpx3     | protein_coding | 5.70  | 5.87  | 5.52  | 5.81  | 7.32  | 8.04  | 7.59  | 7.86  |
| Up   | ENSMUSG000000025854 | 1.36  | 1.14E-28 | Fam20c   | protein_coding | 7.61  | 7.93  | 7.57  | 7.86  | 9.18  | 8.99  | 9.02  | 9.17  |
| Up   | ENSMUSG000000027603 | 1.24  | 1.14E-28 | Ggt7     | protein_coding | 8.02  | 8.02  | 8.26  | 7.96  | 9.30  | 9.45  | 9.12  | 9.12  |
| Up   | ENSMUSG000000042487 | 1.17  | 1.14E-28 | Leo1     | protein_coding | 7.40  | 7.36  | 7.42  | 7.51  | 8.68  | 8.51  | 8.59  | 8.51  |
| Down | ENSMUSG000000031320 | -1.27 | 1.39E-28 | Rps4x    | protein_coding | 10.18 | 10.09 | 10.02 | 10.11 | 7.80  | 8.94  | 8.80  | 8.82  |
| Down | ENSMUSG000000027977 | -1.03 | 1.44E-28 | Nds3     | protein_coding | 8.62  | 8.71  | 8.66  | 8.71  | 7.87  | 7.71  | 7.64  | 7.51  |
| Down | ENSMUSG000000051656 | -1.02 | 1.51E-28 | Cd2ap    | protein_coding | 7.78  | 7.97  | 7.97  | 7.97  | 6.60  | 6.77  | 6.86  | 6.89  |
| Up   | ENSMUSG000000000308 | 1.04  | 1.63E-28 | Ckmt1    | protein_coding | 9.48  | 9.59  | 9.41  | 9.39  | 10.50 | 10.56 | 10.41 | 10.56 |
| Down | ENSMUSG000000027698 | -1.17 | 2.00E-28 | Nceh1    | protein_coding | 9.31  | 9.33  | 9.17  | 9.12  | 10.40 | 10.24 | 10.67 | 10.22 |
| Up   | ENSMUSG000000005917 | -3.60 | 2.13E-28 | Otx1     | protein_coding | 5.13  | 5.43  | 5.13  | 5.63  | 2.90  | 2.85  | 2.63  | 2.85  |
| Up   | ENSMUSG000000040054 | 1.21  | 2.17E-28 | Baz2a    | protein_coding | 9.08  | 9.06  | 8.88  | 8.82  | 10.18 | 10.28 | 10.15 | 10.05 |
| Down | ENSMUSG000000044477 | -1.03 | 2.29E-28 | Zfand3   | protein_coding | 9.05  | 9.08  | 8.86  | 8.86  | 7.86  | 7.99  | 8.08  | 8.12  |
| Down | ENSMUSG000000053799 | -1.12 | 2.67E-28 | Exoc6    | protein_coding | 8.62  | 8.87  | 8.64  | 8.64  | 7.32  | 7.67  | 7.76  | 7.56  |
| Up   | ENSMUSG000000029126 | 1.04  | 2.70E-28 | Nsg1     | protein_coding | 9.75  | 9.73  | 9.73  | 9.68  | 10.54 | 10.91 | 10.88 | 10.72 |
| Up   | ENSMUSG000000060924 | 1.03  | 2.78E-28 | Csm1d    | protein_coding | 9.29  | 9.37  | 9.45  | 9.57  | 10.29 | 10.53 | 10.36 | 10.59 |
| Down | ENSMUSG000000069833 | -1.62 | 2.84E-28 | Ahnak    | protein_coding | 8.00  | 7.81  | 7.74  | 7.95  | 6.72  | 5.82  | 5.97  | 6.55  |
| Down | ENSMUSG000000026365 | -2.57 | 3.12E-28 | Cfh      | protein_coding | 6.46  | 6.20  | 5.70  | 6.28  | 3.73  | 4.27  | 3.45  | 4.17  |
| Down | ENSMUSG000000048027 | -1.43 | 3.40E-28 | Stard5   | protein_coding | 7.50  | 7.28  | 7.29  | 7.16  | 6.05  | 5.92  | 6.04  | 5.84  |
| Down | ENSMUSG000000007888 | -2.91 | 3.46E-28 | Chf1     | protein_coding | 5.79  | 5.70  | 6.04  | 5.85  | 3.81  | 3.77  | 2.63  | 3.44  |
| Down | ENSMUSG000000039887 | -1.62 | 3.49E-28 | Rre1b    | protein_coding |       |       |       |       |       |       |       |       |



|      |                     |       |          |               |                |       |       |       |       |       |       |       |       |
|------|---------------------|-------|----------|---------------|----------------|-------|-------|-------|-------|-------|-------|-------|-------|
| Down | ENSMUSG00000008136  | -1.64 | 4.10E-28 | Fhl2          | protein_coding | 7.31  | 7.48  | 7.52  | 7.13  | 5.78  | 5.66  | 6.21  | 5.44  |
| Up   | ENSMUSG00000010914  | 1.09  | 4.36E-28 | Pdhx          | protein_coding | 8.05  | 7.73  | 7.85  | 7.92  | 8.99  | 8.91  | 9.03  | 8.93  |
| Down | ENSMUSG00000015575  | -1.65 | 4.82E-28 | Atp6v0e       | protein_coding | 6.78  | 6.80  | 6.89  | 6.90  | 6.90  | 5.48  | 5.19  | 5.65  |
| Down | ENSMUSG00000007613  | -1.63 | 4.95E-28 | Tgfb1         | protein_coding | 7.55  | 7.42  | 7.56  | 7.46  | 6.17  | 5.39  | 6.07  | 6.00  |
| Down | ENSMUSG00000035237  | -2.90 | 5.47E-28 | Lcat          | protein_coding | 7.37  | 7.29  | 7.42  | 6.98  | 5.11  | 4.32  | 4.04  | 4.28  |
| Down | ENSMUSG00000025256  | -1.71 | 6.71E-28 | Zfh4          | protein_coding | 8.62  | 8.35  | 8.35  | 8.50  | 7.03  | 6.41  | 6.40  | 7.15  |
| Down | ENSMUSG00000008546  | -1.37 | 6.82E-28 | Rpl23a        | protein_coding | 10.25 | 10.28 | 10.42 | 10.34 | 9.25  | 8.73  | 9.07  | 8.92  |
| Down | ENSMUSG00000004609  | -2.57 | 9.18E-28 | Cd33          | protein_coding | 5.92  | 5.68  | 5.77  | 6.22  | 3.64  | 4.16  | 3.45  | 3.66  |
| Up   | ENSMUSG00000037946  | 1.83  | 9.43E-28 | Fgd3          | protein_coding | 5.80  | 5.52  | 5.64  | 5.22  | 7.33  | 7.24  | 7.08  | 7.49  |
| Up   | ENSMUSG00000034327  | 1.38  | 1.04E-27 | Kctd9         | protein_coding | 6.64  | 6.38  | 6.62  | 6.89  | 8.03  | 8.08  | 8.08  | 7.77  |
| Up   | ENSMUSG00000059316  | 1.15  | 1.09E-27 | Slc27a4       | protein_coding | 8.19  | 7.82  | 8.07  | 7.86  | 9.25  | 8.99  | 9.16  | 9.09  |
| Up   | ENSMUSG00000026141  | 1.55  | 1.11E-27 | Col19a1       | protein_coding | 6.53  | 6.52  | 6.65  | 6.52  | 8.07  | 7.63  | 8.31  | 8.19  |
| Down | ENSMUSG00000020821  | -1.02 | 1.22E-27 | Kif1c         | protein_coding | 10.01 | 9.73  | 9.97  | 9.89  | 8.89  | 8.70  | 9.05  | 8.91  |
| Down | ENSMUSG00000022329  | -1.50 | 1.31E-27 | Stk3          | protein_coding | 8.38  | 8.50  | 8.42  | 8.48  | 7.30  | 6.54  | 6.91  | 7.07  |
| Up   | ENSMUSG00000029755  | 2.73  | 1.34E-27 | Dlx5          | protein_coding | 4.87  | 5.63  | 5.04  | 5.58  | 7.84  | 8.29  | 7.65  | 7.80  |
| Down | ENSMUSG00000030218  | -4.71 | 1.38E-27 | Mgp           | protein_coding | 4.91  | 5.87  | 5.59  | 5.71  | 2.74  | 2.62  | 2.54  | 2.54  |
| Down | ENSMUSG00000064373  | -1.25 | 1.39E-27 | Selenop       | protein_coding | 10.82 | 10.82 | 10.40 | 10.49 | 9.47  | 9.55  | 9.15  | 9.38  |
| Down | ENSMUSG00000026436  | -1.13 | 1.44E-27 | Elk4          | protein_coding | 8.84  | 9.04  | 8.90  | 8.99  | 8.08  | 7.69  | 7.48  | 8.00  |
| Up   | ENSMUSG00000050705  | 1.05  | 1.47E-27 | 2310061104Rik | protein_coding | 7.45  | 7.62  | 7.55  | 7.53  | 8.46  | 8.53  | 8.73  | 8.58  |
| Down | ENSMUSG00000049288  | -1.47 | 1.51E-27 | Liv1l         | protein_coding | 7.54  | 7.37  | 7.64  | 7.59  | 5.71  | 6.29  | 6.08  | 6.32  |
| Down | ENSMUSG00000044933  | -1.95 | 1.56E-27 | Sstr3         | protein_coding | 7.54  | 7.80  | 7.58  | 7.60  | 5.11  | 6.20  | 5.46  | 5.86  |
| Up   | ENSMUSG00000036699  | 1.94  | 1.64E-27 | Zcchc12       | protein_coding | 6.79  | 7.06  | 6.28  | 7.38  | 8.72  | 9.07  | 8.70  | 8.84  |
| Down | ENSMUSG00000002274  | -1.61 | 1.74E-27 | Metrn         | protein_coding | 7.93  | 7.63  | 7.60  | 7.81  | 6.03  | 5.97  | 6.29  | 6.29  |
| Up   | ENSMUSG00000024427  | 1.63  | 1.81E-27 | Spry4         | protein_coding | 6.96  | 7.40  | 7.12  | 6.59  | 8.85  | 8.55  | 8.66  | 8.49  |
| Down | ENSMUSG00000039835  | -2.33 | 2.11E-27 | Nhs1          | protein_coding | 8.91  | 8.91  | 8.90  | 8.89  | 6.75  | 6.21  | 6.85  | 6.60  |
| Up   | ENSMUSG00000034570  | 2.18  | 2.61E-27 | Inpp5j        | protein_coding | 7.65  | 7.73  | 7.94  | 7.52  | 9.92  | 10.03 | 9.76  | 9.78  |
| Down | ENSMUSG00000062006  | -1.44 | 2.76E-27 | Rpl34         | protein_coding | 9.68  | 9.52  | 9.47  | 9.62  | 8.03  | 8.51  | 8.04  | 7.93  |
| Down | ENSMUSG00000020709  | -2.79 | 2.82E-27 | Adap2         | protein_coding | 5.74  | 5.70  | 5.63  | 5.53  | 3.29  | 3.52  | 3.13  | 3.66  |
| Down | ENSMUSG00000041771  | -1.89 | 3.11E-27 | Slc24a4       | protein_coding | 7.80  | 7.66  | 7.89  | 7.89  | 5.29  | 6.35  | 5.54  | 6.41  |
| Down | ENSMUSG00000026065  | -3.49 | 3.32E-27 | Slc9a4        | protein_coding | 6.79  | 6.61  | 6.83  | 6.51  | 3.45  | 3.33  | 3.54  | 4.23  |
| Down | ENSMUSG00000031627  | -1.17 | 3.32E-27 | Irf2          | protein_coding | 8.21  | 8.14  | 8.12  | 8.22  | 7.12  | 7.18  | 7.03  | 6.83  |
| Down | ENSMUSG00000019960  | -1.90 | 3.62E-27 | Dusp6         | protein_coding | 8.03  | 7.93  | 7.66  | 7.69  | 6.43  | 5.64  | 5.52  | 6.22  |
| Down | ENSMUSG00000031245  | -2.01 | 4.05E-27 | Hmg5          | protein_coding | 7.64  | 7.45  | 7.41  | 7.41  | 6.01  | 5.36  | 5.62  | 5.93  |
| Up   | ENSMUSG00000032127  | 1.16  | 4.12E-27 | Irf11         | protein_coding | 7.54  | 7.80  | 7.62  | 7.56  | 8.81  | 8.77  | 8.77  | 8.77  |
| Down | ENSMUSG00000033491  | -4.12 | 4.67E-27 | Prss35        | protein_coding | 5.76  | 5.78  | 6.19  | 6.15  | 3.40  | 2.00  | 2.45  | 3.29  |
| Down | ENSMUSG00000050229  | -1.28 | 5.13E-27 | Pigm          | protein_coding | 7.41  | 7.36  | 7.54  | 7.30  | 6.44  | 5.99  | 6.08  | 6.15  |
| Up   | ENSMUSG00000021868  | 1.24  | 5.15E-27 | Ppif          | protein_coding | 7.21  | 7.32  | 7.40  | 7.16  | 8.44  | 8.57  | 8.45  | 8.50  |
| Up   | ENSMUSG00000045314  | 1.91  | 5.58E-27 | Sowahb        | protein_coding | 5.64  | 5.78  | 5.46  | 5.55  | 7.39  | 7.33  | 7.57  | 7.43  |
| Down | ENSMUSG00000000732  | -2.84 | 5.62E-27 | Icosl         | protein_coding | 5.89  | 5.76  | 5.94  | 5.40  | 2.90  | 3.61  | 3.50  | 3.70  |
| Down | ENSMUSG00000060961  | -1.04 | 5.77E-27 | Slc4a4        | protein_coding | 9.97  | 10.00 | 10.11 | 9.88  | 8.69  | 9.30  | 8.80  | 8.98  |
| Down | ENSMUSG00000090125  | -2.10 | 6.32E-27 | Pou3f1        | protein_coding | 8.51  | 7.99  | 8.49  | 8.09  | 6.88  | 5.95  | 6.11  | 5.81  |
| Down | ENSMUSG00000038976  | -1.05 | 6.44E-27 | Ppp1r9b       | protein_coding | 13.55 | 13.44 | 13.40 | 13.12 | 12.45 | 12.26 | 12.30 | 12.22 |
| Up   | ENSMUSG00000036932  | 1.27  | 6.73E-27 | Aifm1         | protein_coding | 6.93  | 7.07  | 6.86  | 6.98  | 8.22  | 8.28  | 8.16  | 8.17  |
| Up   | ENSMUSG00000047606  | 1.53  | 8.00E-27 | Ankrd34c      | protein_coding | 5.73  | 5.41  | 5.49  | 5.86  | 7.14  | 7.01  | 7.10  | 7.10  |
| Up   | ENSMUSG00000057766  | 1.17  | 9.72E-27 | Ankrd29       | protein_coding | 7.81  | 7.49  | 7.29  | 7.35  | 8.78  | 8.64  | 8.54  | 8.38  |
| Up   | ENSMUSG00000062526  | 1.02  | 9.83E-27 | Mppe1         | protein_coding | 7.87  | 8.24  | 7.97  | 8.18  | 8.97  | 9.17  | 9.18  | 8.99  |
| Down | ENSMUSG00000028936  | -1.13 | 1.08E-26 | Rpl22         | protein_coding | 9.66  | 9.36  | 9.54  | 9.51  | 8.37  | 8.22  | 8.29  | 8.68  |
| Up   | ENSMUSG00000015683  | 1.30  | 1.09E-26 | Sleap2        | protein_coding | 6.72  | 6.54  | 6.14  | 7.12  | 8.49  | 8.52  | 8.53  | 8.59  |
| Up   | ENSMUSG00000027254  | 1.05  | 1.25E-26 | Map1a         | protein_coding | 12.85 | 12.64 | 12.67 | 12.43 | 13.91 | 13.63 | 13.79 | 13.47 |
| Up   | ENSMUSG00000005986  | 1.16  | 1.27E-26 | Ankrd13d      | protein_coding | 7.21  | 7.36  | 7.30  | 7.43  | 8.50  | 8.61  | 8.55  | 8.18  |
| Down | ENSMUSG00000038132  | -2.00 | 1.29E-26 | Rbm24         | protein_coding | 6.51  | 6.84  | 7.18  | 6.78  | 5.12  | 4.76  | 4.92  | 5.13  |
| Down | ENSMUSG00000041559  | -3.48 | 1.30E-26 | Fmod          | protein_coding | 5.48  | 5.87  | 5.97  | 5.65  | 3.35  | 3.33  | 2.79  | 2.78  |
| Down | ENSMUSG00000027239  | -3.04 | 1.31E-26 | Mdk           | protein_coding | 5.78  | 5.52  | 5.59  | 6.05  | 3.35  | 2.62  | 3.75  | 3.39  |
| Up   | ENSMUSG00000036748  | 1.01  | 1.38E-26 | Cuedc2        | protein_coding | 8.45  | 8.41  | 8.52  | 8.46  | 9.44  | 9.46  | 9.55  | 9.41  |
| Down | ENSMUSG00000007617  | -1.06 | 1.39E-26 | Homer1        | protein_coding | 10.39 | 10.40 | 10.22 | 10.24 | 9.09  | 9.28  | 9.28  | 9.36  |
| Up   | ENSMUSG00000024811  | 1.22  | 1.50E-26 | Tnks2         | protein_coding | 10.04 | 10.06 | 9.95  | 10.02 | 11.33 | 11.39 | 11.05 | 11.15 |
| Down | ENSMUSG00000004719  | -2.73 | 1.50E-26 | Nxph3         | protein_coding | 7.45  | 7.12  | 6.99  | 6.91  | 5.11  | 3.65  | 4.87  | 4.46  |
| Down | ENSMUSG00000008398  | -1.71 | 1.81E-26 | Elk3          | protein_coding | 5.98  | 5.93  | 5.87  | 5.91  | 4.44  | 4.52  | 4.44  | 4.55  |
| Up   | ENSMUSG00000030683  | 1.15  | 1.89E-26 | Sez6l2        | protein_coding | 10.45 | 10.33 | 10.21 | 10.05 | 11.75 | 11.32 | 11.36 | 11.17 |
| Down | ENSMUSG00000051000  | -2.66 | 1.90E-26 | Fam160a1      | protein_coding | 6.56  | 6.69  | 6.65  | 6.62  | 4.19  | 3.38  | 4.07  | 4.79  |
| Up   | ENSMUSG00000010496  | 2.85  | 2.00E-26 | Nlix2-1       | protein_coding | 4.29  | 4.13  | 4.43  | 4.48  | 7.20  | 6.54  | 6.74  | 7.12  |
| Up   | ENSMUSG00000033885  | 1.26  | 2.29E-26 | Pxk           | protein_coding | 7.35  | 7.42  | 7.37  | 7.20  | 8.53  | 8.85  | 8.64  | 8.19  |
| Up   | ENSMUSG00000018001  | 1.03  | 3.07E-26 | Cyth3         | protein_coding | 8.31  | 8.13  | 8.27  | 8.09  | 9.28  | 9.14  | 9.40  | 9.03  |
| Up   | ENSMUSG00000049985  | 2.21  | 3.08E-26 | Ankrd55       | protein_coding | 4.84  | 5.52  | 5.42  | 4.80  | 7.45  | 7.23  | 7.10  | 7.22  |
| Up   | ENSMUSG00000028710  | 1.24  | 3.28E-26 | Ataf1         | protein_coding | 7.90  | 7.96  | 8.00  | 8.03  | 9.13  | 9.17  | 9.38  | 9.11  |
| Up   | ENSMUSG00000031007  | 1.24  | 3.58E-26 | Atp6ap2       | protein_coding | 8.89  | 9.00  | 8.84  | 9.04  | 10.23 | 10.13 | 10.35 | 9.95  |
| Down | ENSMUSG00000030166  | -1.50 | 4.05E-26 | Rad52         | protein_coding | 7.51  | 7.49  | 7.70  | 7.67  | 5.71  | 5.86  | 6.58  | 6.27  |
| Down | ENSMUSG00000036890  | -1.16 | 4.35E-26 | Gtld1         | protein_coding | 8.26  | 8.30  | 8.39  | 8.42  | 6.76  | 7.46  | 7.24  | 7.28  |
| Down | ENSMUSG00000020785  | -1.14 | 4.87E-26 | Camkk1        | protein_coding | 9.49  | 9.46  | 9.68  | 9.36  | 8.42  | 8.41  | 8.38  | 8.29  |
| Down | ENSMUSG00000025402  | -1.38 | 4.89E-26 | Nab2          | protein_coding | 7.38  | 7.33  | 7.52  | 7.68  | 6.43  | 5.92  | 6.29  | 5.93  |
| Up   | ENSMUSG00000028789  | 1.35  | 5.20E-26 | Azin2         | protein_coding | 7.08  | 6.90  | 6.97  | 6.90  | 8.05  | 8.45  | 8.57  | 8.17  |
| Down | ENSMUSG00000079110  | -2.51 | 5.88E-26 | Capn3         | protein_coding | 6.16  | 6.31  | 6.18  | 6.30  | 4.49  | 4.49  | 4.23  | 4.23  |
| Up   | ENSMUSG00000027776  | 1.29  | 6.76E-26 | Stamip1l      | protein_coding | 6.60  | 6.73  | 6.83  | 6.73  | 8.13  | 8.16  | 8.13  | 7.94  |
| Up   | ENSMUSG00000027361  | 1.68  | 7.22E-26 | Bcl2l11       | protein_coding | 5.64  | 5.50  | 5.64  | 5.84  | 7.49  | 6.84  | 7.08  | 6.96  |
| Up   | ENSMUSG00000015656  | 1.03  | 9.70E-26 | Hspa8         | protein_coding | 12.89 | 12.60 | 12.47 | 12.44 | 13.78 | 13.61 | 13.68 | 13.48 |
| Down | ENSMUSG00000063457  | -1.26 | 1.04E-25 | Rps15         | protein_coding | 10.15 | 9.95  | 10.04 | 10.02 | 8.70  | 8.87  | 8.65  | 8.90  |
| Down | ENSMUSG00000015852  | -3.50 | 1.13E-25 | Fcrls         | protein_coding | 6.51  | 6.41  | 6.10  | 6.12  | 2.66  | 3.91  | 2.54  | 3.92  |
| Up   | ENSMUSG00000096014  | 1.49  | 1.16E-25 | Sox1          | protein_coding | 7.09  | 7.30  | 7.33  | 7.42  | 8.53  | 8.85  | 8.85  | 8.74  |
| Down | ENSMUSG00000037071  | -1.09 | 1.23E-25 | Scd1          | protein_coding | 10.06 | 9.86  | 9.88  | 10.10 | 9.13  | 8.58  | 8.80  | 9.00  |
| Down | ENSMUSG00000025170  | -1.76 | 1.32E-25 | Rab40b        | protein_coding | 7.41  | 7.30  | 7.56  | 7.55  | 5.14  | 6.00  | 5.82  | 5.98  |
| Down | ENSMUSG000000049420 | -1.41 | 1.52E-25 | Tmem200a      | protein_coding | 7.49  | 7.38  | 7.13  | 7.53  | 6.03  | 6.22  | 5.98  | 5.93  |
| Up   | ENSMUSG00000002633  | 3.25  | 1.54E-25 | Shh           | protein_coding | 3.81  | 3.11  | 3.65  | 3.50  | 5.84  | 6.53  | 6.40  | 6.20  |
| Down | ENSMUSG00000034361  | -1.57 | 1.65E-25 | Cpne2         | protein_coding | 7.96  | 8.06  | 7.78  | 7.86  | 6.28  | 5.99  | 6.28  | 6.93  |
| Up   | ENSMUSG00000023391  | 2.95  | 1.66E-25 | Dlx2          | protein_coding | 4.84  | 5.17  | 4.49  | 5.34  | 7.74  | 7.71  | 7.87  | 7.81  |
| Down | ENSMUSG00000026163  | -1.01 | 1.77E-25 | Sphkap        | protein_coding | 10.41 | 10.37 | 10.29 | 10.08 | 9.13  | 9.50  | 9.37  | 9.10  |
| Down | ENSMUSG00000046352  | -3.65 | 2.28E-25 | Gjb2          | protein_coding | 5.15  | 5.92  | 5.86  | 5.78  | 3.29  | 2.98  | 2.62  | 2.62  |
| Down | ENSMUSG00000022148  | -2.90 | 2.71E-25 | Frb           | protein_coding | 6.59  | 6.37  | 5.93  | 6.37  | 4.13  | 3.67  | 3.95  | 3.95  |

|      |                     |       |          |          |                |       |       |       |       |       |       |       |       |
|------|---------------------|-------|----------|----------|----------------|-------|-------|-------|-------|-------|-------|-------|-------|
| Down | ENSMUSG00000007944  | -1.20 | 3.28E-25 | Ttc9b    | protein_coding | 9.03  | 8.91  | 8.81  | 8.77  | 7.59  | 7.87  | 7.80  | 7.51  |
| Up   | ENSMUSG000000039154 | 2.04  | 3.29E-25 | Shd      | protein_coding | 6.43  | 6.40  | 6.77  | 6.27  | 8.20  | 8.57  | 8.70  | 8.34  |
| Down | ENSMUSG000000047712 | -1.81 | 3.39E-25 | Ust      | protein_coding | 9.13  | 9.05  | 9.27  | 9.10  | 7.13  | 7.11  | 7.89  | 7.12  |
| Up   | ENSMUSG000000038845 | 1.34  | 3.44E-25 | Phb      | protein_coding | 7.81  | 7.71  | 7.88  | 7.84  | 8.96  | 9.16  | 9.35  | 9.02  |
| Down | ENSMUSG000000024713 | -1.23 | 3.54E-25 | Pcsk5    | protein_coding | 7.53  | 7.39  | 7.33  | 7.38  | 5.73  | 6.29  | 6.51  | 6.24  |
| Down | ENSMUSG000000019936 | -3.99 | 3.65E-25 | Epyc     | protein_coding | 5.28  | 5.25  | 5.27  | 5.33  | 2.13  | 2.92  | 2.45  | 2.85  |
| Up   | ENSMUSG000000023951 | 1.37  | 3.82E-25 | Tcfim    | protein_coding | 7.70  | 7.71  | 7.47  | 7.32  | 8.94  | 9.22  | 8.86  | 8.68  |
| Down | ENSMUSG000000027982 | -2.60 | 4.39E-25 | Vcam1    | protein_coding | 6.36  | 5.82  | 6.26  | 6.65  | 3.35  | 3.84  | 4.13  | 4.55  |
| Up   | ENSMUSG000000023909 | 1.12  | 4.78E-25 | Pap4     | protein_coding | 8.51  | 8.44  | 8.40  | 8.27  | 9.80  | 9.58  | 9.25  | 9.36  |
| Up   | ENSMUSG000000030259 | 1.17  | 4.90E-25 | Rassf8   | protein_coding | 7.68  | 7.75  | 7.86  | 7.91  | 9.08  | 8.86  | 8.98  | 8.87  |
| Down | ENSMUSG000000035649 | -1.06 | 5.42E-25 | Zcchc7   | protein_coding | 8.43  | 8.64  | 8.82  | 8.70  | 7.86  | 7.49  | 7.58  | 7.48  |
| Up   | ENSMUSG000000079020 | 1.02  | 5.87E-25 | Slc45a4  | protein_coding | 8.70  | 8.36  | 8.25  | 8.32  | 9.53  | 9.35  | 9.55  | 9.27  |
| Down | ENSMUSG000000022212 | -1.02 | 6.15E-25 | Cpne6    | protein_coding | 10.08 | 9.90  | 10.12 | 9.87  | 8.69  | 9.04  | 9.07  | 9.10  |
| Down | ENSMUSG000000020248 | -1.30 | 6.18E-25 | Nfyb     | protein_coding | 9.02  | 9.03  | 9.29  | 9.12  | 8.12  | 7.63  | 7.44  | 8.03  |
| Up   | ENSMUSG000000032131 | 1.23  | 6.20E-25 | Abcg4    | protein_coding | 8.09  | 7.81  | 7.93  | 7.81  | 8.92  | 9.28  | 9.31  | 8.99  |
| Down | ENSMUSG000000061718 | -2.69 | 6.36E-25 | Ppp1r1b  | protein_coding | 8.28  | 7.88  | 8.05  | 8.09  | 5.04  | 5.61  | 4.52  | 6.00  |
| Down | ENSMUSG000000021721 | -1.38 | 6.58E-25 | Htr1a    | protein_coding | 8.05  | 8.24  | 8.02  | 7.95  | 6.89  | 6.61  | 6.36  | 6.95  |
| Down | ENSMUSG000000039474 | -1.52 | 7.10E-25 | Wfs1     | protein_coding | 8.92  | 8.67  | 8.54  | 8.96  | 7.42  | 7.47  | 6.80  | 7.38  |
| Up   | ENSMUSG000000039683 | 1.18  | 7.42E-25 | Sdk1     | protein_coding | 5.97  | 6.30  | 6.14  | 6.15  | 7.27  | 7.15  | 7.40  | 7.28  |
| Up   | ENSMUSG000000039661 | 1.01  | 9.14E-25 | Dusp28   | protein_coding | 8.31  | 8.54  | 8.19  | 8.31  | 9.51  | 9.20  | 9.20  | 9.44  |
| Down | ENSMUSG000000030729 | -1.05 | 1.05E-24 | Pgm2r1   | protein_coding | 11.71 | 11.75 | 11.53 | 11.65 | 10.53 | 10.67 | 10.77 | 10.45 |
| Down | ENSMUSG000000059857 | -2.48 | 1.07E-24 | Ntng1    | protein_coding | 8.55  | 8.92  | 8.41  | 8.55  | 5.81  | 6.77  | 5.38  | 6.48  |
| Down | ENSMUSG000000025967 | -1.01 | 1.07E-24 | Eef1b2   | protein_coding | 9.88  | 9.88  | 9.93  | 10.04 | 9.21  | 8.98  | 8.74  | 8.91  |
| Up   | ENSMUSG000000004565 | 1.22  | 1.14E-24 | Pnpla6   | protein_coding | 7.19  | 7.21  | 7.16  | 7.55  | 8.25  | 8.78  | 8.53  | 8.32  |
| Up   | ENSMUSG000000024966 | 1.09  | 1.14E-24 | Sltp1    | protein_coding | 9.74  | 9.62  | 9.24  | 9.34  | 10.76 | 10.68 | 10.52 | 10.35 |
| Down | ENSMUSG000000008668 | -1.29 | 1.17E-24 | Rps18    | protein_coding | 9.79  | 9.55  | 9.77  | 9.73  | 8.45  | 8.43  | 8.47  | 8.39  |
| Up   | ENSMUSG000000024773 | 1.16  | 1.23E-24 | Atg2a    | protein_coding | 7.58  | 7.43  | 7.17  | 7.35  | 8.69  | 8.55  | 8.58  | 8.27  |
| Down | ENSMUSG000000042797 | -1.74 | 1.24E-24 | Aap11    | protein_coding | 7.21  | 7.14  | 7.32  | 7.32  | 5.07  | 5.95  | 5.46  | 5.75  |
| Down | ENSMUSG000000039004 | -2.58 | 1.29E-24 | Bmp6     | protein_coding | 6.20  | 5.95  | 5.88  | 6.51  | 3.50  | 3.91  | 3.87  | 4.33  |
| Down | ENSMUSG000000026676 | -3.15 | 1.31E-24 | Ccdc3    | protein_coding | 6.79  | 6.82  | 6.75  | 6.48  | 3.17  | 4.90  | 3.63  | 3.34  |
| Up   | ENSMUSG000000093536 | 1.28  | 1.41E-24 | Smim17   | protein_coding | 6.99  | 7.00  | 6.80  | 7.14  | 8.05  | 8.29  | 8.41  | 8.41  |
| Up   | ENSMUSG000000051527 | 1.27  | 1.48E-24 | Usp29    | protein_coding | 8.19  | 8.42  | 8.41  | 8.49  | 9.29  | 9.78  | 9.75  | 9.70  |
| Down | ENSMUSG000000037148 | -2.53 | 1.49E-24 | Artgap10 | protein_coding | 6.78  | 7.17  | 7.12  | 7.15  | 3.69  | 4.78  | 4.78  | 4.59  |
| Down | ENSMUSG000000069132 | -3.15 | 1.75E-24 | Rfx1     | protein_coding | 4.22  | 4.15  | 3.83  | 4.09  | 6.25  | 6.15  | 6.29  | 7.35  |
| Up   | ENSMUSG000000028975 | 1.13  | 1.75E-24 | Pex14    | protein_coding | 7.77  | 7.55  | 7.83  | 7.74  | 8.88  | 8.84  | 8.90  | 8.74  |
| Down | ENSMUSG000000040229 | -4.27 | 1.83E-24 | Gpr34    | protein_coding | 4.98  | 4.89  | 5.56  | 5.97  | 2.82  | 2.34  | 2.13  | 2.92  |
| Up   | ENSMUSG000000026458 | 1.00  | 2.00E-24 | Ppfla4   | protein_coding | 9.58  | 9.61  | 9.59  | 9.51  | 10.50 | 10.57 | 10.71 | 10.50 |
| Down | ENSMUSG000000067786 | -1.85 | 2.11E-24 | Nnat     | protein_coding | 10.10 | 10.17 | 10.00 | 10.42 | 8.23  | 8.57  | 7.60  | 8.72  |
| Up   | ENSMUSG000000027194 | 1.02  | 2.39E-24 | Ttc17    | protein_coding | 7.62  | 7.60  | 7.91  | 7.78  | 8.80  | 8.52  | 8.91  | 8.72  |
| Up   | ENSMUSG000000038264 | 1.03  | 2.41E-24 | Sema7a   | protein_coding | 8.84  | 8.55  | 8.96  | 8.61  | 9.88  | 9.76  | 9.89  | 9.53  |
| Up   | ENSMUSG000000032306 | 1.36  | 2.64E-24 | Mpi      | protein_coding | 6.93  | 7.16  | 6.96  | 7.19  | 8.25  | 8.36  | 8.68  | 8.23  |
| Down | ENSMUSG000000052146 | -1.18 | 2.64E-24 | Rps10    | protein_coding | 8.60  | 8.50  | 8.54  | 8.44  | 7.19  | 7.39  | 7.19  | 7.39  |
| Down | ENSMUSG000000027452 | -1.47 | 2.65E-24 | Acss1    | protein_coding | 7.12  | 7.43  | 7.33  | 7.28  | 5.90  | 5.42  | 6.06  | 6.08  |
| Down | ENSMUSG000000018593 | -2.69 | 2.91E-24 | Sparc    | protein_coding | 9.71  | 9.69  | 9.53  | 9.48  | 6.90  | 7.46  | 5.70  | 7.23  |
| Down | ENSMUSG000000055538 | -1.42 | 3.00E-24 | Zcchc24  | protein_coding | 9.48  | 9.40  | 9.30  | 9.25  | 8.48  | 7.64  | 7.62  | 7.92  |
| Down | ENSMUSG000000032500 | -2.08 | 3.08E-24 | Dclk3    | protein_coding | 6.79  | 6.55  | 6.81  | 6.62  | 4.66  | 3.77  | 5.20  | 5.11  |
| Down | ENSMUSG000000010086 | -1.19 | 3.29E-24 | Rif112   | protein_coding | 9.03  | 8.90  | 9.14  | 8.55  | 7.69  | 7.89  | 7.78  | 7.78  |
| Up   | ENSMUSG000000002812 | 1.55  | 3.52E-24 | Fili     | protein_coding | 7.94  | 7.50  | 7.61  | 7.32  | 9.24  | 8.93  | 9.26  | 9.10  |
| Down | ENSMUSG000000043496 | -1.62 | 3.52E-24 | Tril     | protein_coding | 8.04  | 7.84  | 8.17  | 7.97  | 6.42  | 6.76  | 5.77  | 6.62  |
| Down | ENSMUSG000000051817 | -1.44 | 3.57E-24 | Sox12    | protein_coding | 7.96  | 7.99  | 8.24  | 8.01  | 6.89  | 6.03  | 6.70  | 6.83  |
| Up   | ENSMUSG000000031790 | 1.77  | 3.63E-24 | Mmp15    | protein_coding | 6.18  | 6.09  | 5.91  | 6.56  | 8.21  | 7.76  | 7.90  | 7.76  |
| Up   | ENSMUSG000000067369 | 1.56  | 3.95E-24 | Tmt12b   | protein_coding | 6.00  | 6.40  | 6.04  | 6.20  | 7.57  | 7.61  | 7.88  | 7.62  |
| Down | ENSMUSG000000033306 | -1.20 | 4.05E-24 | Lpp      | protein_coding | 7.51  | 7.73  | 7.68  | 7.47  | 6.27  | 6.20  | 6.81  | 6.39  |
| Down | ENSMUSG000000018672 | -5.14 | 4.08E-24 | Copz2    | protein_coding | 5.36  | 5.56  | 5.15  | 5.57  | 2.57  | 2.00  | 2.45  | 2.34  |
| Down | ENSMUSG000000026728 | -1.97 | 4.46E-24 | Vim      | protein_coding | 6.77  | 6.84  | 7.21  | 6.99  | 4.84  | 4.72  | 5.02  | 5.69  |
| Down | ENSMUSG000000034796 | -2.40 | 5.09E-24 | Cpne7    | protein_coding | 9.18  | 9.20  | 9.20  | 8.84  | 5.62  | 6.94  | 7.05  | 7.00  |
| Down | ENSMUSG000000035274 | -2.56 | 5.34E-24 | Tpbp     | protein_coding | 5.73  | 5.97  | 5.50  | 5.97  | 3.77  | 3.52  | 3.50  | 3.85  |
| Down | ENSMUSG000000036103 | -2.92 | 5.90E-24 | Colec12  | protein_coding | 5.60  | 5.90  | 5.77  | 5.87  | 3.55  | 3.69  | 2.71  | 3.57  |
| Up   | ENSMUSG000000027195 | 1.13  | 6.14E-24 | Hsd17b12 | protein_coding | 7.89  | 7.71  | 8.00  | 8.15  | 8.96  | 9.06  | 9.26  | 8.94  |
| Down | ENSMUSG000000039831 | -1.38 | 6.34E-24 | Artgap29 | protein_coding | 6.73  | 7.00  | 7.06  | 6.97  | 5.05  | 5.10  | 5.69  | 5.98  |
| Up   | ENSMUSG000000052928 | 1.02  | 6.64E-24 | Cifl     | protein_coding | 9.50  | 9.48  | 9.56  | 9.23  | 10.48 | 10.56 | 10.51 | 10.30 |
| Down | ENSMUSG000000029359 | -1.55 | 6.69E-24 | Tesc     | protein_coding | 7.36  | 7.41  | 7.54  | 7.32  | 6.14  | 5.64  | 6.17  | 5.66  |
| Down | ENSMUSG000000061740 | -2.45 | 6.76E-24 | Cyp2d22  | protein_coding | 5.53  | 6.22  | 5.65  | 5.86  | 3.45  | 3.65  | 3.59  | 4.28  |
| Up   | ENSMUSG000000024892 | 1.36  | 6.89E-24 | Pcx      | protein_coding | 7.36  | 7.29  | 7.22  | 7.10  | 8.73  | 8.67  | 8.60  | 8.31  |
| Up   | ENSMUSG000000059493 | 2.10  | 6.92E-24 | Nhs      | protein_coding | 5.85  | 5.97  | 5.43  | 6.17  | 7.66  | 8.13  | 7.71  | 8.04  |
| Down | ENSMUSG000000057092 | -2.77 | 7.49E-24 | Fxyd3    | protein_coding | 6.22  | 6.45  | 6.20  | 6.21  | 4.13  | 4.30  | 2.93  | 3.81  |
| Down | ENSMUSG000000032017 | -1.26 | 9.19E-24 | Grik4    | protein_coding | 8.05  | 8.28  | 8.43  | 7.95  | 6.93  | 6.95  | 7.15  | 6.79  |
| Down | ENSMUSG000000023992 | -3.46 | 9.48E-24 | Trem2    | protein_coding | 5.02  | 5.21  | 4.89  | 5.22  | 2.78  | 2.35  | 3.12  | 3.12  |
| Down | ENSMUSG000000052155 | -1.27 | 1.04E-23 | Acrv2a   | protein_coding | 8.68  | 8.70  | 8.50  | 8.96  | 7.58  | 7.43  | 7.28  | 7.55  |
| Down | ENSMUSG000000025993 | -2.56 | 1.18E-23 | Slc40a1  | protein_coding | 5.53  | 5.33  | 5.60  | 5.64  | 3.15  | 3.64  | 3.79  | 3.34  |
| Down | ENSMUSG000000089809 | -1.56 | 1.21E-23 | Rasgef1b | protein_coding | 7.26  | 7.42  | 7.05  | 7.11  | 6.13  | 5.47  | 5.24  | 5.93  |
| Up   | ENSMUSG000000027148 | 1.10  | 1.22E-23 | Ccnh     | protein_coding | 7.82  | 7.97  | 7.95  | 8.08  | 9.01  | 8.98  | 9.25  | 8.92  |
| Down | ENSMUSG000000037119 | -1.52 | 1.27E-23 | Ccdc152  | protein_coding | 8.32  | 8.29  | 7.83  | 8.08  | 6.71  | 6.71  | 6.71  | 6.81  |
| Down | ENSMUSG000000044165 | -1.42 | 1.28E-23 | Lsm1     | protein_coding | 6.81  | 6.80  | 6.80  | 5.74  | 6.03  | 5.55  | 5.73  | 5.64  |
| Down | ENSMUSG000000035919 | -1.27 | 1.28E-23 | Bbs9     | protein_coding | 7.43  | 7.59  | 7.31  | 7.03  | 6.45  | 6.20  | 5.83  | 6.34  |
| Down | ENSMUSG000000034009 | -1.67 | 1.29E-23 | Rxfp1    | protein_coding | 6.85  | 7.07  | 6.83  | 7.02  | 5.62  | 4.85  | 5.63  | 5.28  |
| Down | ENSMUSG000000050029 | -1.44 | 1.29E-23 | Rap2c    | protein_coding | 8.19  | 8.31  | 8.37  | 8.37  | 7.05  | 6.68  | 6.42  | 7.31  |
| Up   | ENSMUSG000000020099 | 1.86  | 1.30E-23 | Unc5b    | protein_coding | 7.09  | 7.07  | 7.23  | 7.32  | 9.34  | 8.50  | 9.16  | 8.93  |
| Down | ENSMUSG000000057322 | -1.14 | 1.31E-23 | Rpl38    | protein_coding | 9.78  | 9.69  | 9.72  | 9.84  | 8.66  | 8.57  | 8.83  | 8.41  |
| Down | ENSMUSG000000031654 | -3.49 | 1.36E-23 | Cbln1    | protein_coding | 5.45  | 6.28  | 5.92  | 5.88  | 2.66  | 3.43  | 2.63  | 3.66  |
| Up   | ENSMUSG000000045039 | 1.22  | 1.43E-23 | Megf8    | protein_coding | 9.04  | 8.93  | 8.75  | 8.63  | 10.13 | 9.92  | 10.22 | 9.96  |
| Down | ENSMUSG000000004105 | -2.35 | 1.51E-23 | Angptl2  | protein_coding | 5.13  | 5.08  | 5.40  | 5.57  | 2.47  | 4.16  | 3.13  | 3.53  |
| Down | ENSMUSG000000024665 | -2.32 | 1.60E-23 | Fads2    | protein_coding | 8.81  | 8.97  | 8.99  | 8.97  | 6.17  | 6.70  | 7.14  | 7.41  |
| Up   | ENSMUSG000000020688 | 1.68  | 1.63E-23 | Ccne1    | protein_coding | 5.80  | 5.77  | 5.61  | 5.83  | 7.63  | 7.20  | 7.26  | 7.31  |
| Up   | ENSMUSG000000048616 | 2.35  | 1.68E-23 | Nog      | protein_coding | 5.02  | 4.79  | 4.91  | 5.07  | 6.93  | 7.25  | 7.43  | 6.89  |
| Down | ENSMUSG000000030793 | -3.51 | 1.85E-23 | Pycard   | protein_coding | 4.89  | 4.84  | 5.26  | 5.00  | 2.00  | 2.44  | 3.35  | 2.62  |
| Down | ENSMUSG000000043964 | -1.45 | 1.89E-23 | Crao3    | protein_coding | 7.26  | 7.26  | 7.05  | 6.74  | 5.71  | 5.7   |       |       |

|      |                     |       |          |               |                |       |       |       |       |       |       |       |       |
|------|---------------------|-------|----------|---------------|----------------|-------|-------|-------|-------|-------|-------|-------|-------|
| Down | ENSMUSG00000034686  | -1.73 | 2.03E-23 | Prr7          | protein_coding | 7.91  | 7.72  | 8.14  | 7.91  | 6.58  | 6.39  | 5.40  | 6.39  |
| Up   | ENSMUSG00000009035  | 1.00  | 2.07E-23 | Tmem184b      | protein_coding | 8.55  | 8.62  | 8.38  | 8.40  | 9.37  | 9.45  | 9.75  | 9.32  |
| Down | ENSMUSG00000022602  | -2.38 | 2.32E-23 | Arc           | protein_coding | 9.79  | 9.84  | 9.37  | 9.35  | 7.34  | 7.56  | 6.17  | 7.57  |
| Down | ENSMUSG000000064052 | -4.58 | 2.33E-23 | Gm5089        | protein_coding | 5.76  | 5.31  | 5.79  | 5.87  | 2.00  | 2.00  | 2.71  | 3.23  |
| Up   | ENSMUSG00000004642  | 1.34  | 2.34E-23 | Sibp          | protein_coding | 6.45  | 6.50  | 6.64  | 6.79  | 7.88  | 7.93  | 7.87  | 7.93  |
| Up   | ENSMUSG00000033083  | 1.57  | 2.38E-23 | Tbc1d4        | protein_coding | 6.16  | 5.76  | 5.81  | 5.85  | 7.40  | 7.64  | 7.49  | 7.03  |
| Down | ENSMUSG0000000128   | -2.90 | 2.39E-23 | Wfs9a         | protein_coding | 5.89  | 5.63  | 6.11  | 5.63  | 3.55  | 3.43  | 3.62  | 3.73  |
| Down | ENSMUSG00000032687  | -1.74 | 2.43E-23 | Pon2          | protein_coding | 7.35  | 7.36  | 7.50  | 7.70  | 6.10  | 6.10  | 5.94  | 5.95  |
| Down | ENSMUSG00000002985  | -2.05 | 2.49E-23 | Apoe          | protein_coding | 12.21 | 11.98 | 12.15 | 12.10 | 10.25 | 9.72  | 9.58  | 10.53 |
| Up   | ENSMUSG00000003234  | 1.05  | 2.52E-23 | Abcf3         | protein_coding | 7.64  | 7.59  | 7.84  | 7.47  | 8.75  | 8.62  | 8.75  | 8.61  |
| Up   | ENSMUSG00000026312  | 1.46  | 3.01E-23 | Cdh7          | protein_coding | 6.29  | 6.59  | 6.53  | 6.79  | 7.91  | 8.39  | 7.78  | 7.75  |
| Down | ENSMUSG00000050808  | -2.12 | 3.14E-23 | Muc15         | protein_coding | 5.41  | 6.07  | 5.73  | 5.66  | 3.73  | 4.37  | 3.87  | 3.66  |
| Down | ENSMUSG00000026354  | -1.92 | 4.18E-23 | Lt            | protein_coding | 7.87  | 7.55  | 7.58  | 7.36  | 6.14  | 5.41  | 5.94  | 5.41  |
| Down | ENSMUSG00000023034  | -1.53 | 4.22E-23 | Nr4a1         | protein_coding | 7.83  | 8.23  | 8.22  | 7.80  | 6.25  | 6.76  | 6.32  | 6.77  |
| Down | ENSMUSG00000031983  | -1.08 | 4.40E-23 | 2310022B05Rik | protein_coding | 8.70  | 8.73  | 8.87  | 8.84  | 7.87  | 7.51  | 7.69  | 7.81  |
| Down | ENSMUSG00000041702  | -1.11 | 4.65E-23 | Btd7          | protein_coding | 7.99  | 8.13  | 8.09  | 8.28  | 6.79  | 7.32  | 6.77  | 7.20  |
| Up   | ENSMUSG00000039137  | 1.31  | 4.98E-23 | Whm           | protein_coding | 7.98  | 8.13  | 7.89  | 8.09  | 9.11  | 9.56  | 9.14  | 9.44  |
| Up   | ENSMUSG00000033707  | 1.69  | 5.08E-23 | Lrrc24        | protein_coding | 6.31  | 5.97  | 6.17  | 5.83  | 7.61  | 7.79  | 7.93  | 7.47  |
| Up   | ENSMUSG00000038028  | 1.22  | 5.36E-23 | Tigar         | protein_coding | 7.43  | 7.47  | 7.41  | 7.18  | 8.64  | 8.60  | 8.66  | 8.37  |
| Down | ENSMUSG00000028004  | -2.35 | 5.42E-23 | Npy2l         | protein_coding | 7.73  | 7.57  | 7.53  | 7.76  | 4.78  | 5.48  | 4.79  | 6.14  |
| Down | ENSMUSG00000038059  | -2.65 | 6.11E-23 | Smn3          | protein_coding | 6.44  | 6.21  | 6.37  | 5.98  | 3.50  | 3.47  | 4.19  | 4.43  |
| Down | ENSMUSG00000033854  | -1.31 | 6.83E-23 | Kcnk10        | protein_coding | 7.24  | 7.55  | 7.40  | 7.24  | 5.90  | 6.01  | 6.51  | 5.91  |
| Up   | ENSMUSG00000033253  | 1.28  | 7.45E-23 | Szl2          | protein_coding | 7.56  | 7.24  | 7.27  | 7.27  | 8.49  | 8.87  | 8.39  | 8.61  |
| Down | ENSMUSG00000003575  | -1.13 | 7.73E-23 | Crtc1         | protein_coding | 10.05 | 9.89  | 9.98  | 9.86  | 8.67  | 9.14  | 8.52  | 8.89  |
| Up   | ENSMUSG00000052353  | 1.14  | 7.82E-23 | Cemip         | protein_coding | 7.52  | 7.42  | 7.67  | 7.40  | 8.68  | 8.46  | 8.66  | 8.72  |
| Up   | ENSMUSG00000042035  | 1.54  | 8.32E-23 | Igsf3         | protein_coding | 6.47  | 6.79  | 6.94  | 6.77  | 8.01  | 8.35  | 8.46  | 8.18  |
| Down | ENSMUSG00000024293  | -1.09 | 8.89E-23 | Esco1         | protein_coding | 7.94  | 8.22  | 8.05  | 8.23  | 6.74  | 7.13  | 6.95  | 7.31  |
| Up   | ENSMUSG00000028467  | 1.07  | 8.92E-23 | Gba2          | protein_coding | 8.06  | 8.13  | 8.11  | 7.88  | 9.12  | 9.01  | 9.30  | 8.97  |
| Up   | ENSMUSG00000038545  | 1.30  | 9.19E-23 | Cul7          | protein_coding | 6.93  | 7.01  | 6.91  | 7.08  | 8.32  | 8.45  | 8.01  | 8.21  |
| Down | ENSMUSG00000030068  | -1.39 | 9.33E-23 | Gm20696       | protein_coding | 7.54  | 7.74  | 7.55  | 7.60  | 6.53  | 6.21  | 5.72  | 6.49  |
| Up   | ENSMUSG00000026765  | 2.54  | 9.61E-23 | Lypd6b        | protein_coding | 5.44  | 5.41  | 5.55  | 5.75  | 7.90  | 7.89  | 8.30  | 7.76  |
| Down | ENSMUSG00000020651  | -2.72 | 1.10E-22 | Slc26a4       | protein_coding | 6.63  | 6.82  | 6.91  | 6.84  | 3.77  | 5.07  | 3.87  | 4.28  |
| Down | ENSMUSG00000044707  | -2.20 | 1.25E-22 | Ccnyl         | protein_coding | 6.35  | 6.17  | 6.19  | 6.34  | 4.00  | 4.87  | 4.79  | 3.89  |
| Down | ENSMUSG00000022965  | -1.12 | 1.30E-22 | Ing2          | protein_coding | 9.12  | 9.04  | 9.04  | 8.26  | 7.74  | 7.94  | 7.64  | 7.96  |
| Down | ENSMUSG00000015484  | -1.77 | 1.34E-22 | Fam163a       | protein_coding | 7.13  | 7.11  | 7.11  | 7.17  | 4.95  | 5.99  | 5.49  | 5.20  |
| Up   | ENSMUSG000000109324 | 1.01  | 1.67E-22 | Prmt1         | protein_coding | 7.50  | 7.44  | 7.58  | 7.52  | 8.44  | 8.59  | 8.65  | 8.33  |
| Down | ENSMUSG00000022335  | -1.25 | 1.81E-22 | Zfat          | protein_coding | 6.55  | 6.71  | 6.49  | 6.52  | 5.46  | 5.32  | 5.20  | 5.59  |
| Up   | ENSMUSG00000017167  | 1.02  | 2.05E-22 | Cntnap1       | protein_coding | 9.85  | 9.66  | 9.76  | 9.59  | 10.72 | 10.71 | 10.94 | 10.52 |
| Up   | ENSMUSG00000020048  | 1.01  | 2.47E-22 | Hsp90b1       | protein_coding | 11.05 | 10.84 | 10.55 | 10.69 | 12.03 | 11.80 | 11.66 | 11.70 |
| Down | ENSMUSG000000071855 | -1.54 | 2.48E-22 | Ccdc112       | protein_coding | 7.28  | 7.32  | 7.33  | 7.46  | 5.17  | 6.15  | 5.67  | 6.26  |
| Down | ENSMUSG00000038070  | -1.06 | 2.52E-22 | Cntln         | protein_coding | 7.92  | 8.04  | 7.80  | 8.04  | 6.85  | 6.71  | 6.87  | 7.21  |
| Down | ENSMUSG00000040857  | -1.40 | 2.67E-22 | Erf           | protein_coding | 7.24  | 7.26  | 7.62  | 7.42  | 5.79  | 5.93  | 6.46  | 5.92  |
| Down | ENSMUSG00000029335  | -2.65 | 2.85E-22 | Bmp3          | protein_coding | 6.35  | 7.01  | 5.90  | 6.61  | 3.55  | 4.68  | 3.90  | 4.28  |
| Down | ENSMUSG00000028137  | -1.09 | 3.01E-22 | Cell3         | protein_coding | 9.14  | 9.06  | 9.48  | 9.20  | 7.89  | 8.29  | 8.00  | 8.35  |
| Up   | ENSMUSG00000038936  | 1.17  | 3.04E-22 | Scppdh        | protein_coding | 7.63  | 8.14  | 7.92  | 8.06  | 9.20  | 9.07  | 9.00  | 9.14  |
| Down | ENSMUSG00000020728  | -1.65 | 3.07E-22 | Cep112        | protein_coding | 7.48  | 7.69  | 7.29  | 7.45  | 6.43  | 5.34  | 5.87  | 5.75  |
| Down | ENSMUSG00000028273  | -1.44 | 3.34E-22 | Pfilin5       | protein_coding | 7.17  | 7.21  | 6.99  | 7.39  | 5.77  | 5.54  | 6.11  | 5.80  |
| Down | ENSMUSG00000021876  | -3.30 | 3.35E-22 | Rnase4        | protein_coding | 5.64  | 5.75  | 5.52  | 5.83  | 3.17  | 3.28  | 2.00  | 3.66  |
| Down | ENSMUSG000000071636 | -2.73 | 3.37E-22 | Rimbp3        | protein_coding | 5.29  | 5.40  | 5.43  | 5.54  | 3.04  | 3.33  | 3.07  | 3.66  |
| Down | ENSMUSG00000075256  | -2.51 | 3.50E-22 | Cerkl         | protein_coding | 6.60  | 6.74  | 6.66  | 6.69  | 4.47  | 5.07  | 3.30  | 4.25  |
| Up   | ENSMUSG00000023092  | 1.01  | 3.52E-22 | Fhl1          | protein_coding | 7.92  | 7.75  | 7.57  | 8.12  | 8.83  | 8.71  | 9.14  | 8.87  |
| Up   | ENSMUSG00000037892  | 2.02  | 3.71E-22 | Pcdh18        | protein_coding | 4.72  | 4.72  | 4.63  | 5.16  | 6.60  | 6.79  | 6.57  | 6.75  |
| Up   | ENSMUSG00000039313  | 1.69  | 3.95E-22 | Minar1        | protein_coding | 5.86  | 6.15  | 6.20  | 6.40  | 8.04  | 7.82  | 7.54  | 7.75  |
| Down | ENSMUSG00000024827  | -1.95 | 4.33E-22 | Gldc          | protein_coding | 7.24  | 7.15  | 6.94  | 6.85  | 5.17  | 4.92  | 4.87  | 5.73  |
| Down | ENSMUSG00000049800  | -1.18 | 4.89E-22 | Sertad2       | protein_coding | 7.96  | 7.71  | 8.06  | 7.88  | 6.94  | 6.75  | 6.41  | 6.88  |
| Down | ENSMUSG00000026586  | -1.97 | 4.93E-22 | Prrx1         | protein_coding | 6.30  | 6.27  | 5.86  | 6.50  | 4.03  | 4.56  | 4.38  | 4.85  |
| Down | ENSMUSG00000060636  | -1.22 | 4.93E-22 | Rpl35a        | protein_coding | 9.04  | 8.81  | 7.73  | 7.86  | 9.03  | 7.79  | 7.86  | 7.61  |
| Down | ENSMUSG00000019066  | -2.01 | 5.08E-22 | Rab3d         | protein_coding | 6.56  | 6.54  | 6.84  | 6.49  | 4.54  | 4.07  | 5.29  | 4.92  |
| Down | ENSMUSG00000026249  | -1.00 | 5.56E-22 | Serpin2       | protein_coding | 8.78  | 8.93  | 8.71  | 8.82  | 7.90  | 7.88  | 7.69  | 7.81  |
| Down | ENSMUSG00000027004  | -2.38 | 5.79E-22 | Frzb          | protein_coding | 6.70  | 6.68  | 6.38  | 6.24  | 4.76  | 3.87  | 4.00  | 4.81  |
| Down | ENSMUSG00000021390  | -4.02 | 5.93E-22 | Ogn           | protein_coding | 4.57  | 5.28  | 5.38  | 5.38  | 2.44  | 2.13  | 2.86  | 2.78  |
| Down | ENSMUSG00000041598  | -1.35 | 6.19E-22 | Cdc42ep4      | protein_coding | 7.17  | 7.29  | 7.36  | 7.38  | 5.90  | 6.25  | 5.62  | 6.17  |
| Down | ENSMUSG00000090061  | -1.61 | 6.26E-22 | Nwd2          | protein_coding | 7.99  | 7.95  | 7.95  | 8.16  | 5.99  | 6.87  | 6.38  | 6.44  |
| Down | ENSMUSG00000036306  | -1.37 | 6.66E-22 | Lzts1         | protein_coding | 9.05  | 8.94  | 8.97  | 8.82  | 7.38  | 7.76  | 6.97  | 8.04  |
| Down | ENSMUSG00000027316  | -1.07 | 6.71E-22 | Gfra4         | protein_coding | 7.76  | 7.77  | 7.55  | 7.95  | 6.63  | 6.75  | 6.89  | 6.60  |
| Up   | ENSMUSG00000024525  | 1.65  | 7.17E-22 | Impa2         | protein_coding | 5.79  | 5.84  | 5.82  | 5.22  | 7.20  | 7.16  | 7.67  | 6.93  |
| Up   | ENSMUSG00000035407  | 2.12  | 7.31E-22 | Kank4         | protein_coding | 5.60  | 5.38  | 4.93  | 5.00  | 7.40  | 6.95  | 7.29  | 7.32  |
| Down | ENSMUSG00000053080  | -1.46 | 7.70E-22 | 2700081O15Rik | protein_coding | 8.05  | 7.98  | 7.84  | 7.81  | 6.52  | 6.12  | 6.47  | 6.82  |
| Down | ENSMUSG00000049907  | -1.23 | 1.11E-21 | Rasi11b       | protein_coding | 7.53  | 7.47  | 7.68  | 7.45  | 6.56  | 6.50  | 6.20  | 6.09  |
| Down | ENSMUSG00000033855  | -2.80 | 1.32E-21 | Ston1         | protein_coding | 6.03  | 6.12  | 5.93  | 5.93  | 2.74  | 4.10  | 3.90  | 3.53  |
| Down | ENSMUSG00000093661  | -1.30 | 1.33E-21 | Eif4e3        | protein_coding | 8.03  | 8.08  | 7.80  | 8.05  | 6.84  | 6.67  | 6.48  | 6.87  |
| Up   | ENSMUSG00000032908  | 1.78  | 1.46E-21 | Sgpp2         | protein_coding | 6.12  | 6.28  | 5.83  | 5.83  | 7.94  | 7.88  | 7.61  | 7.50  |
| Down | ENSMUSG00000030747  | -1.48 | 1.59E-21 | Dgat2         | protein_coding | 8.31  | 8.32  | 8.65  | 8.32  | 6.52  | 7.09  | 6.62  | 7.16  |
| Down | ENSMUSG00000028039  | -1.28 | 1.78E-21 | Rfn3          | protein_coding | 8.29  | 8.20  | 6.80  | 6.80  | 8.31  | 8.00  | 8.01  | 7.95  |
| Up   | ENSMUSG00000041231  | 1.34  | 1.80E-21 | Ublep1        | protein_coding | 7.35  | 7.29  | 7.31  | 7.43  | 8.80  | 8.86  | 8.47  | 8.47  |
| Up   | ENSMUSG00000037610  | 2.61  | 1.84E-21 | Kcnmb2        | protein_coding | 5.42  | 5.53  | 5.60  | 5.59  | 7.61  | 8.21  | 8.27  | 7.97  |
| Down | ENSMUSG00000005148  | 1.40  | 2.01E-21 | Klf5          | protein_coding | 6.46  | 7.16  | 6.78  | 7.21  | 8.36  | 8.52  | 8.11  | 8.21  |
| Up   | ENSMUSG00000035849  | 1.02  | 2.22E-21 | Krt222        | protein_coding | 8.59  | 8.56  | 8.78  | 8.46  | 9.68  | 9.50  | 9.76  | 9.52  |
| Down | ENSMUSG00000027978  | -1.24 | 2.39E-21 | Prss12        | protein_coding | 7.22  | 7.22  | 7.31  | 7.06  | 6.10  | 5.85  | 6.06  | 6.08  |
| Up   | ENSMUSG00000030272  | 1.28  | 2.44E-21 | Camk1         | protein_coding | 7.78  | 7.81  | 7.76  | 8.00  | 9.14  | 9.16  | 9.02  | 9.11  |
| Down | ENSMUSG00000030237  | -1.93 | 2.51E-21 | Sloc1a4       | protein_coding | 5.39  | 5.55  | 5.42  | 5.58  | 4.19  | 3.47  | 3.79  | 3.99  |
| Down | ENSMUSG00000035376  | -1.14 | 2.65E-21 | Hacd2         | protein_coding | 7.38  | 7.67  | 7.53  | 7.53  | 6.41  | 6.32  | 6.60  | 6.38  |
| Down | ENSMUSG00000052684  | -1.15 | 2.67E-21 | Jun           | protein_coding | 9.42  | 9.42  | 9.44  | 9.23  | 8.46  | 7.89  | 8.42  | 8.12  |
| Up   | ENSMUSG00000046841  | 1.21  | 2.74E-21 | Ckap4         | protein_coding | 7.17  | 7.26  | 7.47  | 7.18  | 8.45  | 8.57  | 8.65  | 8.14  |
| Up   | ENSMUSG00000041303  | 1.02  | 2.74E-21 | Gtf3c3        | protein_coding | 7.32  | 7.60  | 7.23  | 7.37  | 8.39  | 8.56  | 8.40  | 8.19  |
| Down | ENSMUSG00000019230  | -2.41 | 2.96E-21 | Lhx9          | protein_coding | 6.52  | 6.76  | 6.94  | 6.94  | 4.59  | 4.94  | 4.63  | 4.11  |
| Down | ENSMUSG00000038677  | -2.18 | 3.01E-21 | Scube3        | protein_coding | 5.28  | 5.63  | 5.85  | 5.86  | 3.40  | 3.61  | 4.52  | 3.99  |
| Down | ENSMUSG00000042348  | -1.15 | 3.07E-21 |               |                |       |       |       |       |       |       |       |       |

|      |                     |       |          |           |                |       |       |       |       |       |       |       |       |
|------|---------------------|-------|----------|-----------|----------------|-------|-------|-------|-------|-------|-------|-------|-------|
| Down | ENSMUSG00000071847  | -1.93 | 3.73E-21 | Apcdd1    | protein_coding | 6.95  | 6.73  | 6.91  | 6.92  | 4.56  | 4.72  | 5.61  | 5.20  |
| Down | ENSMUSG00000030671  | -1.18 | 4.05E-21 | Pde3b     | protein_coding | 7.47  | 7.58  | 7.65  | 7.64  | 6.42  | 5.95  | 6.54  | 6.74  |
| Down | ENSMUSG00000049969  | -2.38 | 4.80E-21 | Plekhf2   | protein_coding | 6.32  | 6.33  | 6.24  | 6.70  | 3.73  | 4.16  | 3.87  | 5.02  |
| Down | ENSMUSG000000047675 | -1.14 | 5.01E-21 | Rps8      | protein_coding | 10.72 | 10.62 | 10.63 | 10.64 | 9.50  | 9.58  | 9.56  | 9.41  |
| Up   | ENSMUSG000000004815 | 1.07  | 5.15E-21 | Dgkq      | protein_coding | 7.13  | 7.15  | 7.20  | 7.16  | 8.15  | 8.26  | 8.26  | 8.19  |
| Down | ENSMUSG000000046318 | -1.41 | 5.83E-21 | Ocbp1     | protein_coding | 7.51  | 7.45  | 7.52  | 7.60  | 6.14  | 6.12  | 6.38  | 5.98  |
| Down | ENSMUSG000000023218 | -1.33 | 6.16E-21 | Rpsa      | protein_coding | 11.80 | 11.85 | 11.84 | 11.56 | 10.49 | 10.33 | 10.43 | 10.51 |
| Down | ENSMUSG000000242566 | -3.16 | 6.34E-21 | Aczyap1   | protein_coding | 5.15  | 5.91  | 5.02  | 5.34  | 2.37  | 3.11  | 2.71  | 3.66  |
| Down | ENSMUSG000000021364 | -2.41 | 6.41E-21 | Elovl2    | protein_coding | 6.21  | 6.09  | 6.35  | 6.32  | 4.44  | 3.56  | 4.38  | 3.99  |
| Up   | ENSMUSG000000033061 | 1.69  | 7.28E-21 | Resp18    | protein_coding | 6.85  | 7.42  | 7.05  | 7.52  | 9.00  | 8.86  | 9.06  | 8.62  |
| Down | ENSMUSG000000079659 | -1.54 | 7.76E-21 | Tmem243   | protein_coding | 6.73  | 6.81  | 6.39  | 6.77  | 5.58  | 5.08  | 5.02  | 5.24  |
| Up   | ENSMUSG000000006641 | 1.40  | 8.73E-21 | Slc5a6    | protein_coding | 6.51  | 6.32  | 6.39  | 6.69  | 7.81  | 7.87  | 7.87  | 7.82  |
| Down | ENSMUSG000000070509 | -1.49 | 8.83E-21 | Rgma      | protein_coding | 8.75  | 8.62  | 8.84  | 8.55  | 7.59  | 6.55  | 6.97  | 7.57  |
| Down | ENSMUSG000000053137 | -1.39 | 9.10E-21 | Mapk11    | protein_coding | 6.44  | 6.67  | 6.59  | 6.38  | 4.95  | 5.50  | 5.30  | 5.10  |
| Down | ENSMUSG000000003617 | -2.10 | 9.59E-21 | Cp        | protein_coding | 6.18  | 6.18  | 5.91  | 6.30  | 3.73  | 4.27  | 4.30  | 4.70  |
| Down | ENSMUSG000000028211 | -1.69 | 9.66E-21 | Trp53inp1 | protein_coding | 6.99  | 7.04  | 7.30  | 7.29  | 5.91  | 5.02  | 5.63  | 5.57  |
| Down | ENSMUSG000000058715 | -3.51 | 1.05E-20 | Fcer1g    | protein_coding | 5.92  | 5.87  | 5.22  | 5.48  | 3.55  | 2.98  | 2.00  | 3.12  |
| Down | ENSMUSG000000026771 | -1.02 | 1.07E-20 | Spopl     | protein_coding | 7.96  | 8.29  | 7.92  | 8.16  | 6.97  | 7.20  | 7.04  | 7.15  |
| Down | ENSMUSG000000020319 | -1.50 | 1.14E-20 | Wdppp     | protein_coding | 7.04  | 6.65  | 6.63  | 6.62  | 5.19  | 5.58  | 5.08  | 5.46  |
| Down | ENSMUSG000000014361 | -1.50 | 1.16E-20 | Merlk     | protein_coding | 7.73  | 7.92  | 7.91  | 7.60  | 6.34  | 6.37  | 6.34  | 6.46  |
| Down | ENSMUSG000000050963 | -1.17 | 1.19E-20 | Kcnk2     | protein_coding | 7.74  | 7.45  | 7.81  | 7.59  | 6.64  | 6.65  | 6.65  | 6.45  |
| Down | ENSMUSG000000055541 | -2.62 | 1.42E-20 | Lair1     | protein_coding | 6.13  | 6.13  | 5.42  | 6.02  | 3.50  | 3.47  | 3.30  | 4.41  |
| Down | ENSMUSG000000036949 | -2.38 | 1.51E-20 | Slc39a12  | protein_coding | 7.25  | 6.59  | 7.25  | 7.04  | 4.72  | 4.64  | 3.83  | 5.28  |
| Up   | ENSMUSG000000030611 | 1.24  | 1.56E-20 | Mrps11    | protein_coding | 6.10  | 6.12  | 6.37  | 6.09  | 7.36  | 7.36  | 7.41  | 7.36  |
| Up   | ENSMUSG000000002844 | 1.11  | 1.63E-20 | Adprh     | protein_coding | 7.86  | 7.66  | 8.09  | 7.90  | 8.89  | 8.83  | 9.16  | 9.03  |
| Down | ENSMUSG000000096519 | -3.10 | 1.77E-20 | Gm10721   | protein_coding | 7.29  | 7.92  | 7.51  | 8.19  | 4.56  | 5.10  | 4.04  | 5.38  |
| Up   | ENSMUSG000000043843 | 1.54  | 1.82E-20 | Tmem145   | protein_coding | 5.91  | 5.68  | 5.98  | 6.28  | 7.39  | 7.55  | 7.62  | 7.62  |
| Up   | ENSMUSG000000053216 | 2.55  | 1.83E-20 | Btn2a2    | protein_coding | 4.15  | 4.01  | 4.01  | 3.98  | 6.51  | 5.82  | 6.33  | 6.31  |
| Down | ENSMUSG000000054920 | -1.03 | 1.84E-20 | Klhl5     | protein_coding | 7.92  | 8.19  | 8.33  | 8.28  | 7.15  | 7.02  | 7.31  | 7.23  |
| Down | ENSMUSG000000042659 | -1.44 | 1.95E-20 | Arrdc4    | protein_coding | 7.14  | 6.79  | 6.87  | 7.09  | 5.30  | 5.63  | 5.74  | 5.76  |
| Down | ENSMUSG000000019997 | -1.90 | 1.96E-20 | Ccn2      | protein_coding | 6.85  | 6.89  | 6.50  | 6.70  | 5.06  | 4.96  | 4.82  | 5.02  |
| Up   | ENSMUSG000000029073 | 1.39  | 2.00E-20 | Ctpb      | protein_coding | 6.46  | 6.50  | 6.45  | 6.51  | 7.79  | 7.99  | 7.95  | 7.57  |
| Down | ENSMUSG000000011103 | -4.26 | 2.00E-20 | Srsbx     | protein_coding | 5.31  | 4.67  | 5.46  | 4.05  | 2.71  | 2.37  | 2.34  | 2.34  |
| Up   | ENSMUSG000000018126 | 2.65  | 2.07E-20 | Baiap2    | protein_coding | 3.61  | 3.73  | 3.89  | 3.82  | 6.70  | 5.81  | 5.88  | 5.88  |
| Down | ENSMUSG000000036782 | 1.48  | 2.10E-20 | Klhl13    | protein_coding | 6.77  | 6.84  | 6.57  | 7.03  | 8.05  | 8.42  | 8.13  | 8.37  |
| Down | ENSMUSG000000063260 | -2.28 | 2.26E-20 | Syt10     | protein_coding | 6.88  | 6.95  | 6.74  | 6.91  | 4.54  | 5.39  | 4.95  | 4.95  |
| Up   | ENSMUSG000000024542 | 1.07  | 2.27E-20 | Cap192    | protein_coding | 6.30  | 6.44  | 6.77  | 6.67  | 7.45  | 7.49  | 7.72  | 7.71  |
| Down | ENSMUSG000000020656 | -1.35 | 2.46E-20 | Grhl1     | protein_coding | 6.98  | 7.01  | 7.20  | 7.13  | 5.38  | 6.12  | 5.62  | 5.95  |
| Down | ENSMUSG000000026098 | -1.12 | 2.58E-20 | Pms1      | protein_coding | 7.57  | 7.49  | 7.41  | 7.38  | 6.42  | 6.64  | 6.11  | 6.32  |
| Down | ENSMUSG000000029570 | -2.71 | 2.88E-20 | Lfng      | protein_coding | 6.29  | 6.65  | 6.21  | 6.24  | 3.45  | 4.47  | 4.11  | 4.11  |
| Down | ENSMUSG000000037225 | -2.10 | 2.88E-20 | Fgf2      | protein_coding | 6.30  | 6.45  | 6.65  | 6.63  | 4.76  | 4.24  | 4.47  | 4.87  |
| Down | ENSMUSG000000028337 | -1.22 | 3.05E-20 | Coro2a    | protein_coding | 7.67  | 7.96  | 7.67  | 7.77  | 6.62  | 6.78  | 6.46  | 6.47  |
| Down | ENSMUSG000000047228 | -2.43 | 3.06E-20 | A2ml1     | protein_coding | 5.83  | 6.49  | 6.36  | 6.55  | 4.47  | 3.65  | 3.90  | 4.55  |
| Down | ENSMUSG000000039001 | -2.09 | 3.67E-20 | Rps21     | protein_coding | 10.53 | 10.40 | 8.22  | 10.59 | 8.69  | 8.69  | 8.18  | 8.47  |
| Down | ENSMUSG000000034765 | -1.96 | 4.00E-20 | Dusp5     | protein_coding | 7.22  | 7.29  | 7.20  | 6.90  | 5.72  | 5.72  | 5.40  | 5.35  |
| Down | ENSMUSG000000004961 | -1.05 | 4.58E-20 | Syt5      | protein_coding | 8.96  | 9.04  | 8.92  | 9.02  | 8.18  | 8.18  | 7.80  | 8.14  |
| Down | ENSMUSG000000001700 | -1.20 | 4.96E-20 | Gram3     | protein_coding | 6.78  | 6.89  | 6.85  | 6.92  | 5.76  | 5.45  | 5.65  | 5.98  |
| Down | ENSMUSG000000025225 | -2.04 | 5.11E-20 | Nfk2      | protein_coding | 8.04  | 7.71  | 7.71  | 7.82  | 5.68  | 6.03  | 5.86  | 5.92  |
| Down | ENSMUSG000000032547 | -1.22 | 5.16E-20 | Ryk       | protein_coding | 7.81  | 7.68  | 7.47  | 7.47  | 6.33  | 6.20  | 6.85  | 6.27  |
| Up   | ENSMUSG000000005447 | 2.17  | 5.25E-20 | Pafah1b3  | protein_coding | 4.59  | 4.31  | 3.80  | 4.60  | 6.39  | 6.17  | 6.40  | 6.20  |
| Up   | ENSMUSG000000044788 | 1.27  | 5.54E-20 | Fads6     | protein_coding | 7.04  | 6.97  | 7.20  | 6.84  | 8.48  | 7.85  | 8.39  | 8.25  |
| Down | ENSMUSG000000029919 | -1.74 | 6.15E-20 | Hpgds     | protein_coding | 5.91  | 6.01  | 5.74  | 5.76  | 4.00  | 4.70  | 4.04  | 4.46  |
| Down | ENSMUSG000000021638 | -2.10 | 6.69E-20 | Ocn       | protein_coding | 6.20  | 6.08  | 5.93  | 6.27  | 4.68  | 3.94  | 3.71  | 4.55  |
| Up   | ENSMUSG000000040356 | 1.01  | 6.81E-20 | Skiv2l    | protein_coding | 7.25  | 7.49  | 7.52  | 7.32  | 8.40  | 8.39  | 8.47  | 8.30  |
| Up   | ENSMUSG000000029507 | 1.60  | 7.03E-20 | Pus1      | protein_coding | 6.24  | 6.36  | 6.15  | 6.19  | 7.80  | 7.81  | 7.83  | 7.69  |
| Up   | ENSMUSG000000048486 | 1.14  | 7.36E-20 | Fitm2     | protein_coding | 7.67  | 7.75  | 7.44  | 7.61  | 8.78  | 8.81  | 8.84  | 8.55  |
| Up   | ENSMUSG000000075033 | 1.01  | 7.63E-20 | Nxpe3     | protein_coding | 7.55  | 7.56  | 7.60  | 7.49  | 8.55  | 8.67  | 8.68  | 8.22  |
| Down | ENSMUSG000000060703 | -2.17 | 8.09E-20 | Cd302     | protein_coding | 5.73  | 5.72  | 5.57  | 5.73  | 3.50  | 3.56  | 3.83  | 4.25  |
| Up   | ENSMUSG000000035835 | 1.15  | 8.54E-20 | Pfpr3     | protein_coding | 7.19  | 7.32  | 6.95  | 7.06  | 8.10  | 8.42  | 8.27  | 8.23  |
| Down | ENSMUSG000000040018 | -1.12 | 8.65E-20 | Cox15     | protein_coding | 7.56  | 7.44  | 7.27  | 7.23  | 8.64  | 8.23  | 8.67  | 8.35  |
| Up   | ENSMUSG000000032115 | 1.01  | 8.91E-20 | Hyoa1     | protein_coding | 9.08  | 8.99  | 8.76  | 8.82  | 10.02 | 9.89  | 9.98  | 9.79  |
| Down | ENSMUSG000000021215 | -1.35 | 9.18E-20 | Net1      | protein_coding | 8.30  | 8.29  | 8.13  | 7.86  | 6.76  | 6.70  | 6.94  | 6.93  |
| Down | ENSMUSG000000063049 | -1.00 | 9.19E-20 | Ing2      | protein_coding | 7.71  | 7.88  | 7.94  | 7.92  | 7.04  | 6.99  | 6.51  | 6.96  |
| Down | ENSMUSG000000023764 | -1.08 | 9.63E-20 | Sf11      | protein_coding | 7.62  | 7.98  | 7.77  | 7.99  | 6.51  | 6.72  | 6.96  | 6.94  |
| Down | ENSMUSG000000021318 | -1.45 | 1.17E-19 | Gli3      | protein_coding | 6.54  | 7.04  | 6.78  | 6.98  | 5.14  | 5.80  | 5.43  | 5.49  |
| Up   | ENSMUSG000000034687 | 1.10  | 1.30E-19 | Fras1     | protein_coding | 8.12  | 7.95  | 8.11  | 8.30  | 9.18  | 8.93  | 9.13  | 9.56  |
| Down | ENSMUSG000000028541 | -1.20 | 1.42E-19 | B4galt2   | protein_coding | 8.04  | 7.95  | 8.16  | 7.94  | 6.60  | 7.05  | 7.13  | 6.55  |
| Up   | ENSMUSG000000042129 | 1.84  | 1.48E-19 | Rassf4    | protein_coding | 5.69  | 6.25  | 5.90  | 6.50  | 7.73  | 7.96  | 7.48  | 7.48  |
| Down | ENSMUSG000000038418 | -1.90 | 1.59E-19 | Egr1      | protein_coding | 9.56  | 9.81  | 9.47  | 9.39  | 7.55  | 8.22  | 6.85  | 7.78  |
| Down | ENSMUSG000000049690 | -1.71 | 1.59E-19 | Nckap5    | protein_coding | 6.89  | 6.94  | 6.92  | 7.14  | 4.92  | 4.76  | 5.50  | 5.70  |
| Down | ENSMUSG000000019966 | -1.88 | 1.70E-19 | Kitl      | protein_coding | 7.54  | 8.10  | 8.15  | 8.02  | 6.03  | 5.57  | 5.39  | 6.55  |
| Up   | ENSMUSG000000020230 | 1.11  | 1.87E-19 | Frrm2     | protein_coding | 8.09  | 8.22  | 8.27  | 8.09  | 8.87  | 9.45  | 9.26  | 9.32  |
| Down | ENSMUSG000000031782 | -1.05 | 1.89E-19 | Cox9      | protein_coding | 7.58  | 7.57  | 8.00  | 7.77  | 8.06  | 8.92  | 8.64  | 8.84  |
| Down | ENSMUSG000000035256 | -1.98 | 1.95E-19 | Protdh    | protein_coding | 7.02  | 7.09  | 6.91  | 6.92  | 4.99  | 5.23  | 4.60  | 5.35  |
| Down | ENSMUSG000000030088 | -1.41 | 2.15E-19 | Aldh1l1   | protein_coding | 6.97  | 7.07  | 7.00  | 6.96  | 5.14  | 5.72  | 5.70  | 5.90  |
| Down | ENSMUSG000000021665 | -1.32 | 2.24E-19 | Hexb      | protein_coding | 8.50  | 8.23  | 8.23  | 8.47  | 7.04  | 7.37  | 6.61  | 7.14  |
| Down | ENSMUSG000000034853 | -1.70 | 2.42E-19 | Acol11    | protein_coding | 7.92  | 7.82  | 7.33  | 7.03  | 5.99  | 6.11  | 5.80  | 5.79  |
| Down | ENSMUSG000000034463 | -2.10 | 2.52E-19 | Scara3    | protein_coding | 7.39  | 7.21  | 7.30  | 7.03  | 4.86  | 5.37  | 5.24  | 5.49  |
| Down | ENSMUSG000000063600 | -1.91 | 2.52E-19 | Egfm1     | protein_coding | 7.47  | 7.20  | 7.30  | 7.23  | 5.17  | 5.89  | 5.20  | 5.59  |
| Up   | ENSMUSG000000042148 | 1.02  | 2.60E-19 | Cox10     | protein_coding | 7.06  | 7.04  | 7.14  | 7.07  | 8.25  | 8.24  | 7.91  | 7.86  |
| Down | ENSMUSG000000041957 | -1.47 | 2.64E-19 | Pkp2      | protein_coding | 7.32  | 7.35  | 7.34  | 7.06  | 6.04  | 6.04  | 5.77  | 5.55  |
| Down | ENSMUSG000000074345 | -1.21 | 2.71E-19 | Tnfrsf8l3 | protein_coding | 8.11  | 8.25  | 8.15  | 8.31  | 6.53  | 7.21  | 7.18  | 7.09  |
| Down | ENSMUSG000000030518 | -1.06 | 2.84E-19 | Fam189a1  | protein_coding | 9.44  | 9.30  | 9.39  | 9.13  | 7.98  | 8.17  | 8.17  | 8.22  |
| Up   | ENSMUSG000000038777 | 1.63  | 2.98E-19 | Sema6c    | protein_coding | 6.50  | 6.73  | 6.28  | 6.10  | 7.90  | 7.96  | 8.11  | 8.05  |
| Down | ENSMUSG000000024517 | -4.16 | 3.11E-19 | Grp       | protein_coding | 6.20  | 6.43  | 6.39  | 6.39  | 3.85  | 2.44  | 2.35  | 3.25  |
| Down | ENSMUSG000000063428 | -2.49 | 3.27E-19 | Ddo       | protein_coding | 5.74  | 6.01  | 5.73  | 6.16  | 4.03  | 4.10  | 2.54  | 4.08  |
| Down | ENSMUSG000000060278 | -1.40 | 3.44E-19 | Ves37b    | protein_coding | 7.16  | 7.07  | 7.20  | 7.04  | 6.06  | 5.83  |       |       |

|      |                     |       |          |               |                |       |       |       |       |       |       |       |       |
|------|---------------------|-------|----------|---------------|----------------|-------|-------|-------|-------|-------|-------|-------|-------|
| Up   | ENSMUSG00000028977  | 1.50  | 4.42E-19 | Cas21         | protein_coding | 5.39  | 5.95  | 5.75  | 5.71  | 7.12  | 7.32  | 6.73  | 7.30  |
| Down | ENSMUSG00000071226  | -1.41 | 4.43E-19 | Cecr2         | protein_coding | 7.26  | 7.25  | 7.21  | 7.24  | 5.90  | 5.92  | 5.45  | 6.21  |
| Up   | ENSMUSG00000054196  | 2.08  | 4.56E-19 | Cthrc1        | protein_coding | 4.48  | 4.86  | 4.34  | 4.87  | 6.53  | 6.64  | 6.16  | 6.78  |
| Down | ENSMUSG000000053563 | -1.93 | 4.61E-19 | 3110082117Rik | protein_coding | 6.22  | 6.29  | 6.10  | 6.09  | 4.54  | 3.84  | 4.35  | 4.90  |
| Up   | ENSMUSG000000042109 | 1.10  | 5.39E-19 | Csdc2         | protein_coding | 9.17  | 9.24  | 8.82  | 9.05  | 10.26 | 10.43 | 9.83  | 10.11 |
| Down | ENSMUSG000000025911 | -2.07 | 5.49E-19 | Adh1e1        | protein_coding | 6.10  | 5.98  | 6.00  | 5.98  | 3.92  | 4.32  | 3.79  | 4.61  |
| Up   | ENSMUSG000000027719 | 1.09  | 5.73E-19 | Acad9         | protein_coding | 7.23  | 7.23  | 7.23  | 7.30  | 7.30  | 8.18  | 8.13  | 8.13  |
| Down | ENSMUSG000000038393 | -1.72 | 6.73E-19 | Txnip         | protein_coding | 6.12  | 6.55  | 6.53  | 6.59  | 4.68  | 4.72  | 4.67  | 5.33  |
| Down | ENSMUSG000000030579 | -6.85 | 7.22E-19 | Tyrbp         | protein_coding | 5.71  | 5.60  | 5.65  | 5.09  | 2.00  | 2.24  | 2.00  | 2.24  |
| Down | ENSMUSG000000033016 | -2.82 | 8.36E-19 | Nfatc1        | protein_coding | 5.36  | 5.93  | 5.68  | 5.83  | 3.40  | 2.85  | 3.79  | 3.57  |
| Down | ENSMUSG000000021360 | -1.88 | 9.74E-19 | Gcnt2         | protein_coding | 6.85  | 6.99  | 7.14  | 7.04  | 4.56  | 5.29  | 5.58  | 5.33  |
| Down | ENSMUSG000000035275 | -2.12 | 1.03E-18 | Raver2        | protein_coding | 8.50  | 8.54  | 8.56  | 8.25  | 5.37  | 6.79  | 6.61  | 6.46  |
| Down | ENSMUSG000000041685 | -1.02 | 1.06E-18 | Fcho2         | protein_coding | 8.57  | 8.44  | 8.40  | 8.56  | 7.81  | 7.34  | 7.08  | 7.64  |
| Down | ENSMUSG000000052544 | -1.28 | 1.09E-18 | Sl6galnac3    | protein_coding | 7.01  | 7.36  | 7.10  | 7.20  | 5.97  | 6.21  | 5.58  | 5.97  |
| Down | ENSMUSG000000022206 | -1.44 | 1.21E-18 | Npr3          | protein_coding | 7.85  | 7.94  | 7.61  | 7.95  | 6.82  | 6.34  | 5.86  | 6.61  |
| Up   | ENSMUSG000000021235 | 1.43  | 1.37E-18 | Coq6          | protein_coding | 5.26  | 5.02  | 5.19  | 5.19  | 6.69  | 6.69  | 6.62  | 6.31  |
| Down | ENSMUSG000000031026 | 1.07  | 1.64E-18 | Trim66        | protein_coding | 7.37  | 7.54  | 7.36  | 7.36  | 8.07  | 8.67  | 8.54  | 8.50  |
| Down | ENSMUSG000000045817 | -1.66 | 1.64E-18 | Zfp362f       | protein_coding | 7.29  | 7.46  | 7.48  | 7.59  | 6.07  | 5.95  | 4.99  | 6.18  |
| Up   | ENSMUSG000000057315 | 1.27  | 1.72E-18 | Arhgap24      | protein_coding | 6.23  | 6.34  | 6.09  | 6.03  | 7.31  | 7.64  | 7.26  | 7.37  |
| Up   | ENSMUSG000000025475 | 1.11  | 1.76E-18 | Adgrn1        | protein_coding | 8.96  | 8.99  | 8.65  | 8.79  | 9.91  | 10.08 | 9.81  | 10.00 |
| Down | ENSMUSG000000026315 | -3.19 | 1.76E-18 | Scrbpnb8      | protein_coding | 4.95  | 4.86  | 5.17  | 5.16  | 2.00  | 3.61  | 2.71  | 2.54  |
| Down | ENSMUSG000000009076 | -1.45 | 1.78E-18 | Zmat5         | protein_coding | 8.27  | 8.12  | 8.30  | 7.79  | 6.93  | 6.63  | 6.72  | 6.57  |
| Down | ENSMUSG000000054074 | -1.21 | 2.01E-18 | Skida1        | protein_coding | 7.21  | 7.32  | 7.58  | 7.43  | 6.04  | 6.21  | 6.30  | 6.33  |
| Up   | ENSMUSG000000074213 | 1.55  | 2.59E-18 | Gm10642       | protein_coding | 6.02  | 6.10  | 5.79  | 5.88  | 7.84  | 7.39  | 7.28  | 7.11  |
| Down | ENSMUSG000000052305 | -3.93 | 2.63E-18 | Hbb-bs        | protein_coding | 6.32  | 6.10  | 6.08  | 6.90  | 3.69  | 2.44  | 2.63  | 3.66  |
| Down | ENSMUSG000000032289 | -1.69 | 2.69E-18 | Thsd4         | protein_coding | 8.18  | 8.00  | 8.26  | 8.09  | 7.04  | 6.30  | 5.75  | 6.59  |
| Down | ENSMUSG000000032251 | -1.23 | 2.86E-18 | Irak1bp1      | protein_coding | 7.19  | 7.21  | 7.21  | 7.41  | 5.92  | 5.96  | 6.10  | 6.31  |
| Up   | ENSMUSG000000009621 | 1.44  | 3.08E-18 | Vav2          | protein_coding | 6.48  | 6.42  | 6.29  | 6.53  | 8.03  | 7.95  | 7.71  | 7.57  |
| Up   | ENSMUSG000000029056 | 1.22  | 3.29E-18 | Pank4         | protein_coding | 6.12  | 6.20  | 6.11  | 6.32  | 7.32  | 7.45  | 7.44  | 7.24  |
| Up   | ENSMUSG000000025268 | 1.66  | 3.42E-18 | Maged2        | protein_coding | 6.75  | 6.61  | 6.74  | 6.86  | 8.35  | 8.15  | 8.58  | 8.36  |
| Down | ENSMUSG000000036908 | -2.16 | 3.43E-18 | Unc93b1       | protein_coding | 6.12  | 6.18  | 5.92  | 6.12  | 4.74  | 4.49  | 3.50  | 3.70  |
| Down | ENSMUSG000000019505 | 1.06  | 3.57E-18 | Ubb           | protein_coding | 11.14 | 11.09 | 11.07 | 11.00 | 12.22 | 11.99 | 12.25 | 12.04 |
| Down | ENSMUSG000000058498 | -3.20 | 3.72E-18 | Kl            | protein_coding | 8.18  | 8.27  | 7.22  | 8.32  | 4.74  | 4.37  | 4.56  | 4.91  |
| Up   | ENSMUSG000000025175 | 1.08  | 3.69E-18 | Frx3k         | protein_coding | 6.89  | 7.06  | 6.85  | 7.06  | 8.13  | 8.22  | 8.03  | 7.70  |
| Up   | ENSMUSG000000044149 | 1.02  | 3.71E-18 | Nkrf          | protein_coding | 7.26  | 7.32  | 7.16  | 7.39  | 8.25  | 8.24  | 8.36  | 8.30  |
| Up   | ENSMUSG000000001988 | 1.79  | 3.72E-18 | Npas1         | protein_coding | 5.21  | 5.71  | 5.71  | 5.69  | 7.42  | 7.10  | 7.66  | 7.29  |
| Up   | ENSMUSG000000082229 | 1.16  | 3.83E-18 | Nap1l2        | protein_coding | 8.72  | 8.63  | 8.81  | 8.83  | 10.07 | 9.91  | 9.82  | 9.79  |
| Up   | ENSMUSG000000075316 | 1.38  | 4.04E-18 | Scn9a         | protein_coding | 6.44  | 6.71  | 6.14  | 6.62  | 8.10  | 8.01  | 7.69  | 7.46  |
| Down | ENSMUSG000000049577 | -1.09 | 4.09E-18 | Zfpm1         | protein_coding | 8.67  | 8.52  | 8.34  | 8.29  | 7.51  | 7.23  | 7.32  | 7.49  |
| Up   | ENSMUSG000000025795 | 1.18  | 4.17E-18 | Rassf3        | protein_coding | 6.95  | 7.10  | 7.10  | 7.05  | 8.15  | 8.26  | 8.13  | 8.27  |
| Up   | ENSMUSG000000040420 | 1.07  | 4.17E-18 | Cdh18         | protein_coding | 6.85  | 6.92  | 6.79  | 7.12  | 7.86  | 8.16  | 7.87  | 7.98  |
| Down | ENSMUSG000000029088 | -1.17 | 4.25E-18 | Kcnip4        | protein_coding | 7.95  | 8.03  | 7.98  | 8.17  | 6.72  | 7.31  | 6.75  | 6.70  |
| Down | ENSMUSG000000030235 | -1.66 | 4.47E-18 | Sico1c1       | protein_coding | 6.56  | 6.12  | 6.17  | 6.69  | 4.92  | 4.94  | 5.17  | 4.41  |
| Down | ENSMUSG000000025321 | -1.21 | 4.65E-18 | Ilgb8         | protein_coding | 8.53  | 8.71  | 8.68  | 8.87  | 7.88  | 7.20  | 7.10  | 7.73  |
| Down | ENSMUSG000000016493 | -1.25 | 4.75E-18 | Cd46          | protein_coding | 6.05  | 6.36  | 5.91  | 6.17  | 5.27  | 5.11  | 4.17  | 4.85  |
| Up   | ENSMUSG000000024644 | 1.16  | 5.22E-18 | Cndp2         | protein_coding | 7.37  | 7.35  | 7.38  | 7.29  | 8.15  | 8.68  | 8.62  | 8.43  |
| Down | ENSMUSG000000009129 | -3.62 | 5.55E-18 | Glifr2b7      | protein_coding | 5.60  | 5.89  | 5.73  | 5.63  | 3.04  | 2.00  | 2.63  | 3.57  |
| Up   | ENSMUSG000000037410 | 1.05  | 6.48E-18 | Tbc1d2b       | protein_coding | 6.54  | 6.51  | 6.69  | 6.69  | 7.57  | 7.37  | 7.65  | 7.58  |
| Down | ENSMUSG000000039179 | -2.24 | 8.82E-18 | Tekt5         | protein_coding | 6.08  | 5.96  | 6.25  | 6.08  | 4.52  | 3.43  | 4.16  | 4.25  |
| Up   | ENSMUSG000000046480 | 1.29  | 8.87E-18 | Scn4b         | protein_coding | 7.00  | 6.78  | 6.74  | 6.35  | 8.00  | 8.30  | 8.03  | 7.56  |
| Up   | ENSMUSG000000050989 | 1.34  | 9.82E-18 | Selenon       | protein_coding | 6.56  | 6.42  | 6.48  | 6.54  | 7.48  | 7.71  | 8.10  | 7.83  |
| Down | ENSMUSG000000046402 | -2.34 | 9.83E-18 | Rbp1          | protein_coding | 5.99  | 5.35  | 5.82  | 6.57  | 4.42  | 4.01  | 3.71  | 3.70  |
| Up   | ENSMUSG000000000766 | 1.43  | 1.00E-17 | Oprm1         | protein_coding | 6.15  | 5.83  | 6.07  | 6.57  | 7.28  | 7.77  | 7.28  | 7.45  |
| Up   | ENSMUSG000000027796 | 1.36  | 1.00E-17 | Smad9         | protein_coding | 6.79  | 6.35  | 6.94  | 6.74  | 7.96  | 8.21  | 8.20  | 7.77  |
| Down | ENSMUSG000000026227 | -1.96 | 1.05E-17 | 2810459M11Rik | protein_coding | 6.25  | 6.16  | 6.37  | 6.55  | 4.13  | 4.76  | 4.69  | 4.63  |
| Down | ENSMUSG000000050295 | -2.57 | 1.12E-17 | Foxc1         | protein_coding | 5.54  | 5.28  | 5.60  | 5.07  | 2.74  | 3.43  | 3.35  | 3.78  |
| Down | ENSMUSG000000022969 | -2.73 | 1.40E-17 | Il10rb        | protein_coding | 5.66  | 5.25  | 5.83  | 6.08  | 3.17  | 3.47  | 2.79  | 4.23  |
| Down | ENSMUSG000000028413 | -2.36 | 1.91E-17 | B4galt1       | protein_coding | 5.75  | 5.56  | 5.57  | 5.91  | 3.57  | 4.16  | 3.63  | 3.81  |
| Down | ENSMUSG000000033208 | -1.52 | 1.96E-17 | S100b         | protein_coding | 8.87  | 8.64  | 8.53  | 8.82  | 7.13  | 7.13  | 6.55  | 7.51  |
| Down | ENSMUSG000000022912 | -2.24 | 2.10E-17 | Prox1         | protein_coding | 5.95  | 6.05  | 6.02  | 6.02  | 4.16  | 4.16  | 3.71  | 4.41  |
| Up   | ENSMUSG000000054226 | 1.08  | 2.13E-17 | Tprkb         | protein_coding | 8.96  | 8.89  | 8.76  | 8.91  | 7.63  | 8.06  | 7.78  | 7.90  |
| Up   | ENSMUSG000000016179 | 1.18  | 2.21E-17 | Camk1g        | protein_coding | 6.66  | 6.78  | 6.84  | 6.58  | 7.85  | 7.91  | 8.00  | 7.87  |
| Down | ENSMUSG000000020052 | -1.64 | 2.29E-17 | Ascl1         | protein_coding | 6.40  | 6.76  | 6.47  | 6.75  | 5.50  | 4.37  | 5.11  | 5.14  |
| Up   | ENSMUSG000000038650 | 1.30  | 2.32E-17 | Rnh1          | protein_coding | 5.75  | 5.90  | 6.20  | 6.07  | 7.03  | 7.58  | 7.03  | 7.25  |
| Up   | ENSMUSG000000039781 | 1.14  | 2.39E-17 | Cep131        | protein_coding | 6.69  | 6.76  | 7.07  | 6.61  | 7.72  | 7.99  | 7.94  | 7.94  |
| Down | ENSMUSG000000008090 | -1.92 | 2.40E-17 | Fgfr1         | protein_coding | 6.66  | 6.67  | 6.43  | 6.61  | 4.00  | 5.34  | 4.52  | 5.08  |
| Down | ENSMUSG000000052336 | -3.44 | 2.55E-17 | Cx3cr1        | protein_coding | 7.58  | 7.53  | 7.34  | 7.51  | 5.22  | 4.22  | 2.71  | 4.23  |
| Down | ENSMUSG000000021846 | -1.24 | 2.86E-17 | Peli2         | protein_coding | 8.13  | 7.75  | 8.23  | 8.09  | 7.02  | 6.54  | 6.94  | 6.85  |
| Down | ENSMUSG000000064125 | -1.14 | 2.93E-17 | Prr36         | protein_coding | 8.28  | 8.29  | 8.07  | 8.29  | 7.09  | 7.35  | 6.67  | 7.27  |
| Up   | ENSMUSG000000013367 | 1.06  | 2.94E-17 | Igln5         | protein_coding | 7.62  | 7.35  | 7.64  | 7.37  | 8.67  | 8.56  | 8.58  | 8.35  |
| Up   | ENSMUSG000000031133 | 1.54  | 3.08E-17 | Arhgef6       | protein_coding | 7.17  | 6.78  | 6.98  | 6.94  | 8.42  | 8.53  | 8.69  | 8.28  |
| Down | ENSMUSG000000024222 | -1.02 | 3.13E-17 | Fkbp5         | protein_coding | 8.79  | 8.73  | 8.71  | 8.45  | 7.81  | 7.71  | 7.72  | 7.42  |
| Up   | ENSMUSG000000020861 | 2.21  | 3.21E-17 | Alox8         | protein_coding | 5.31  | 5.02  | 5.78  | 5.78  | 7.40  | 7.37  | 7.40  | 7.30  |
| Up   | ENSMUSG000000027007 | 1.08  | 3.38E-17 | Iiprd2        | protein_coding | 8.96  | 8.89  | 8.87  | 8.68  | 8.10  | 7.92  | 7.92  | 7.92  |
| Up   | ENSMUSG000000027495 | 1.17  | 3.39E-17 | Fam210b       | protein_coding | 7.64  | 7.63  | 8.02  | 8.05  | 8.70  | 8.90  | 9.24  | 9.15  |
| Up   | ENSMUSG000000032648 | 1.87  | 3.45E-17 | Pygm          | protein_coding | 6.39  | 6.05  | 5.97  | 5.91  | 7.82  | 7.98  | 7.97  | 7.81  |
| Down | ENSMUSG000000021747 | 1.25  | 3.48E-17 | 4930452B06Rik | protein_coding | 6.65  | 6.81  | 7.20  | 6.65  | 8.11  | 7.97  | 8.19  | 7.97  |
| Down | ENSMUSG000000020021 | -1.74 | 3.48E-17 | Fgd6          | protein_coding | 7.42  | 7.66  | 7.47  | 7.52  | 5.52  | 6.52  | 5.14  | 5.86  |
| Up   | ENSMUSG000000034854 | 1.02  | 3.54E-17 | Mfsd12        | protein_coding | 7.50  | 7.40  | 7.58  | 7.43  | 8.60  | 8.54  | 8.55  | 8.22  |
| Down | ENSMUSG000000039239 | -2.41 | 3.55E-17 | Tgfb2         | protein_coding | 8.33  | 7.99  | 8.21  | 8.12  | 5.95  | 4.82  | 5.73  | 6.44  |
| Down | ENSMUSG000000037922 | -3.63 | 3.57E-17 | Bank1         | protein_coding | 4.89  | 5.02  | 4.65  | 4.82  | 2.13  | 2.44  | 2.63  | 2.99  |
| Down | ENSMUSG000000037206 | -2.41 | 4.07E-17 | Islr          | protein_coding | 6.01  | 6.10  | 6.42  | 6.24  | 3.60  | 3.73  | 4.24  | 4.59  |
| Down | ENSMUSG000000075334 | -3.63 | 4.21E-17 | Rprm          | protein_coding | 6.91  | 6.54  | 6.77  | 6.97  | 4.03  | 2.78  | 2.45  | 4.48  |
| Up   | ENSMUSG000000054708 | 1.07  | 4.42E-17 | Ankrd24       | protein_coding | 7.21  | 7.21  | 7.11  | 7.31  | 7.95  | 8.17  | 8.41  | 8.49  |
| Down | ENSMUSG000000022003 | -1.40 | 4.47E-17 | Slc25a30      | protein_coding | 6.51  | 6.82  | 6.48  | 6.75  | 5.33  | 5.00  | 5.50  | 5.54  |
| Down | ENSMUSG000000039634 | -1.46 | 4.74E-17 | Zfp189        | protein_coding | 7.27  | 7.59  | 7.71  | 7.75  | 5.65  | 6.45  | 6.32  | 6.18  |
| Up   | ENSMUSG000000045088 | 1.31  | 4.82E-17 | Gata2         | protein_coding | 7.22  | 7.47  |       |       |       |       |       |       |

|      |                     |       |          |               |                |       |       |       |       |       |       |       |       |
|------|---------------------|-------|----------|---------------|----------------|-------|-------|-------|-------|-------|-------|-------|-------|
| Up   | ENSMUSG00000067578  | 1.77  | 5.42E-17 | Cbln4         | protein_coding | 5.96  | 6.59  | 5.94  | 6.23  | 7.82  | 7.69  | 8.18  | 7.95  |
| Down | ENSMUSG00000064354  | -5.74 | 5.58E-17 | mt-Co2        | protein_coding | 4.54  | 5.64  | 4.82  | 5.00  | 2.25  | 2.34  | 2.00  | 2.12  |
| Down | ENSMUSG00000048794  | -1.96 | 5.59E-17 | Cfap100       | protein_coding | 5.29  | 5.41  | 5.64  | 5.44  | 3.35  | 4.37  | 3.63  | 3.74  |
| Down | ENSMUSG00000021423  | -3.53 | 5.64E-17 | Ly86          | protein_coding | 6.60  | 6.51  | 6.13  | 5.97  | 2.13  | 4.30  | 2.63  | 3.57  |
| Up   | ENSMUSG00000024944  | 1.06  | 5.89E-17 | Arl2          | protein_coding | 7.12  | 7.39  | 7.13  | 7.23  | 8.53  | 8.30  | 8.23  | 8.27  |
| Up   | ENSMUSG000000116138 | 1.42  | 6.18E-17 | C030006K11Rik | protein_coding | 5.80  | 5.44  | 5.67  | 5.81  | 6.92  | 7.30  | 7.09  | 6.77  |
| Up   | ENSMUSG00000025478  | 1.26  | 6.95E-17 | Dpysl4        | protein_coding | 6.83  | 6.65  | 6.77  | 6.51  | 7.86  | 7.98  | 8.18  | 7.81  |
| Down | ENSMUSG00000040274  | -2.01 | 6.98E-17 | Cdk6          | protein_coding | 5.47  | 5.82  | 5.92  | 5.87  | 3.55  | 4.13  | 4.13  | 4.31  |
| Up   | ENSMUSG00000005483  | 1.15  | 7.35E-17 | Dnajb1        | protein_coding | 7.87  | 7.63  | 7.52  | 7.67  | 9.03  | 8.98  | 8.63  | 8.55  |
| Down | ENSMUSG00000068428  | -2.90 | 7.57E-17 | Gmnc          | protein_coding | 5.29  | 5.49  | 5.15  | 5.27  | 2.97  | 3.38  | 3.19  | 2.92  |
| Down | ENSMUSG00000057706  | -1.04 | 8.58E-17 | Mex3b         | protein_coding | 7.62  | 7.53  | 7.55  | 7.16  | 6.71  | 6.30  | 6.33  | 6.50  |
| Down | ENSMUSG00000040289  | -1.02 | 9.53E-17 | Hey1          | protein_coding | 7.88  | 7.75  | 7.78  | 7.72  | 6.34  | 6.77  | 7.01  | 6.94  |
| Down | ENSMUSG00000094936  | -1.10 | 9.76E-17 | Rbm4          | protein_coding | 8.01  | 8.03  | 8.25  | 7.83  | 7.20  | 7.21  | 6.47  | 6.86  |
| Up   | ENSMUSG00000010154  | 1.28  | 1.00E-16 | Spire2        | protein_coding | 6.93  | 7.00  | 6.74  | 6.75  | 8.22  | 8.13  | 8.00  | 8.07  |
| Up   | ENSMUSG00000033430  | 1.01  | 1.05E-16 | Terf2ip       | protein_coding | 8.36  | 8.29  | 8.42  | 8.33  | 9.09  | 9.25  | 9.60  | 9.40  |
| Up   | ENSMUSG00000032714  | 1.91  | 1.08E-16 | Syde1         | protein_coding | 5.92  | 5.46  | 5.65  | 5.57  | 7.59  | 6.98  | 7.86  | 7.36  |
| Down | ENSMUSG00000021928  | -1.57 | 1.16E-16 | Ebpl          | protein_coding | 6.99  | 7.02  | 6.88  | 6.80  | 5.38  | 5.42  | 4.92  | 5.90  |
| Down | ENSMUSG00000027188  | -2.09 | 1.26E-16 | Pax6          | protein_coding | 6.38  | 6.44  | 6.43  | 7.01  | 5.45  | 4.13  | 4.27  | 4.48  |
| Up   | ENSMUSG00000020329  | 1.24  | 1.39E-16 | Polrmt        | protein_coding | 6.44  | 6.23  | 6.53  | 6.33  | 7.63  | 7.45  | 7.41  | 7.61  |
| Down | ENSMUSG00000047419  | -1.73 | 1.52E-16 | Cmya5         | protein_coding | 6.84  | 6.74  | 6.94  | 6.57  | 4.86  | 4.83  | 5.79  | 4.92  |
| Down | ENSMUSG00000050822  | -1.33 | 1.56E-16 | Sic29a4       | protein_coding | 7.51  | 6.74  | 7.28  | 7.57  | 6.10  | 5.97  | 6.09  | 5.97  |
| Up   | ENSMUSG00000091722  | 1.31  | 1.63E-16 | Slah3         | protein_coding | 6.75  | 6.97  | 6.47  | 6.51  | 7.95  | 8.33  | 7.87  | 7.62  |
| Down | ENSMUSG00000023232  | -2.41 | 1.67E-16 | Serinc2       | protein_coding | 5.94  | 5.33  | 5.02  | 5.28  | 3.92  | 3.47  | 3.00  | 3.48  |
| Down | ENSMUSG00000029122  | -1.65 | 1.72E-16 | Evc           | protein_coding | 5.98  | 6.21  | 6.22  | 6.06  | 4.72  | 4.60  | 4.04  | 5.03  |
| Up   | ENSMUSG00000030739  | 1.25  | 1.79E-16 | Myh14         | protein_coding | 7.63  | 7.65  | 7.42  | 7.87  | 9.06  | 8.46  | 9.03  | 8.91  |
| Down | ENSMUSG00000069917  | -3.22 | 1.83E-16 | Hba-a2        | protein_coding | 5.10  | 5.00  | 5.04  | 5.31  | 3.11  | 3.43  | 2.54  | 2.00  |
| Down | ENSMUSG00000040181  | -2.42 | 1.83E-16 | Fmo1          | protein_coding | 5.06  | 5.19  | 5.27  | 5.77  | 3.77  | 2.98  | 3.40  | 3.53  |
| Down | ENSMUSG00000027803  | -2.19 | 1.85E-16 | Wwtr1         | protein_coding | 6.43  | 7.12  | 6.66  | 6.95  | 3.85  | 5.18  | 5.10  | 4.70  |
| Down | ENSMUSG00000062210  | -2.65 | 1.92E-16 | Tnfrsf8       | protein_coding | 6.19  | 6.36  | 6.33  | 6.33  | 4.40  | 4.40  | 2.54  | 4.28  |
| Up   | ENSMUSG00000026930  | 1.27  | 1.96E-16 | Gpsm1         | protein_coding | 7.27  | 7.42  | 7.31  | 7.24  | 8.50  | 8.78  | 8.20  | 8.69  |
| Down | ENSMUSG00000028655  | -1.82 | 2.01E-16 | Mfsd2a        | protein_coding | 6.16  | 6.25  | 6.01  | 5.81  | 4.63  | 3.91  | 4.40  | 4.72  |
| Down | ENSMUSG00000029838  | -1.16 | 2.02E-16 | Ptn           | protein_coding | 10.06 | 10.20 | 10.26 | 10.55 | 9.18  | 8.60  | 9.04  | 9.55  |
| Down | ENSMUSG00000026532  | -1.04 | 2.43E-16 | Cachd1        | protein_coding | 8.15  | 7.67  | 7.92  | 7.81  | 6.72  | 6.77  | 6.72  | 6.72  |
| Down | ENSMUSG00000026683  | -2.48 | 2.48E-16 | Nuf2          | protein_coding | 5.94  | 5.83  | 6.07  | 6.32  | 4.30  | 4.32  | 4.05  | 4.05  |
| Up   | ENSMUSG00000044646  | 1.96  | 2.55E-16 | Zbtb7c        | protein_coding | 4.54  | 4.53  | 4.40  | 4.78  | 6.13  | 6.15  | 6.64  | 6.38  |
| Up   | ENSMUSG00000041741  | 1.56  | 2.63E-16 | Pde3a         | protein_coding | 6.46  | 6.28  | 6.30  | 6.05  | 7.86  | 7.71  | 6.62  | 7.54  |
| Up   | ENSMUSG00000021647  | 2.17  | 2.75E-16 | Cartpt        | protein_coding | 3.99  | 4.61  | 4.65  | 4.96  | 6.10  | 6.68  | 6.47  | 6.92  |
| Down | ENSMUSG00000029385  | -1.05 | 2.96E-16 | Cng2          | protein_coding | 7.94  | 8.12  | 8.03  | 7.96  | 7.21  | 6.91  | 6.75  | 7.04  |
| Up   | ENSMUSG00000029819  | 3.01  | 3.10E-16 | Npy           | protein_coding | 7.69  | 7.34  | 8.10  | 7.53  | 10.69 | 10.21 | 11.25 | 10.33 |
| Up   | ENSMUSG00000032259  | 1.51  | 3.31E-16 | Drd2          | protein_coding | 4.59  | 4.31  | 4.43  | 4.78  | 6.17  | 5.77  | 5.98  | 5.58  |
| Up   | ENSMUSG00000027270  | 1.17  | 3.35E-16 | Lamp5         | protein_coding | 7.18  | 7.52  | 7.09  | 7.20  | 8.23  | 8.17  | 8.80  | 8.32  |
| Down | ENSMUSG00000019577  | -1.52 | 4.08E-16 | Pdk4          | protein_coding | 6.16  | 6.05  | 6.05  | 6.04  | 4.85  | 4.27  | 4.85  | 4.55  |
| Down | ENSMUSG00000073889  | -1.28 | 4.24E-16 | Il11ra1       | protein_coding | 7.25  | 6.78  | 6.88  | 6.82  | 5.45  | 5.88  | 5.83  | 5.74  |
| Down | ENSMUSG00000048424  | -2.24 | 4.35E-16 | Ranbp3l       | protein_coding | 5.44  | 6.06  | 5.67  | 6.07  | 3.45  | 4.54  | 3.24  | 4.11  |
| Down | ENSMUSG00000028864  | -2.42 | 4.40E-16 | Hgf           | protein_coding | 4.59  | 5.00  | 4.78  | 5.16  | 2.74  | 3.38  | 3.54  | 2.70  |
| Up   | ENSMUSG00000064254  | 1.53  | 4.57E-16 | Ethe1         | protein_coding | 5.88  | 5.55  | 5.60  | 5.00  | 6.80  | 7.27  | 7.19  | 6.72  |
| Down | ENSMUSG00000036523  | -2.02 | 4.69E-16 | Gng5          | protein_coding | 6.40  | 6.54  | 6.50  | 7.00  | 5.12  | 4.64  | 4.45  | 4.83  |
| Up   | ENSMUSG00000074909  | 1.01  | 4.93E-16 | Ranbp8        | protein_coding | 8.04  | 8.07  | 7.56  | 7.99  | 9.03  | 9.02  | 8.82  | 8.82  |
| Down | ENSMUSG00000039299  | -1.01 | 5.05E-16 | Zfp81         | protein_coding | 7.87  | 7.87  | 7.88  | 7.88  | 6.83  | 7.08  | 6.88  | 7.10  |
| Down | ENSMUSG00000036256  | -2.64 | 5.37E-16 | Igf1bp7       | protein_coding | 5.45  | 5.17  | 5.27  | 5.44  | 3.23  | 3.65  | 3.00  | 3.23  |
| Up   | ENSMUSG00000019256  | 1.28  | 5.49E-16 | Ahr           | protein_coding | 6.37  | 6.21  | 6.06  | 6.26  | 7.25  | 7.71  | 7.36  | 7.47  |
| Down | ENSMUSG00000002022  | -2.71 | 5.88E-16 | Btd17         | protein_coding | 5.85  | 5.50  | 5.64  | 5.44  | 2.13  | 3.87  | 3.71  | 3.48  |
| Up   | ENSMUSG00000024193  | 1.20  | 6.26E-16 | Phf1          | protein_coding | 7.15  | 7.18  | 7.03  | 6.97  | 8.05  | 8.25  | 8.43  | 8.28  |
| Up   | ENSMUSG00000015016  | 1.09  | 6.43E-16 | Acsf3         | protein_coding | 5.85  | 6.12  | 5.97  | 5.98  | 7.06  | 7.02  | 7.08  | 6.94  |
| Up   | ENSMUSG00000021234  | 1.14  | 6.98E-16 | Fam161b       | protein_coding | 6.59  | 6.43  | 6.47  | 6.45  | 7.69  | 7.62  | 7.68  | 7.52  |
| Down | ENSMUSG00000056069  | -1.44 | 7.26E-16 | Oluln1        | protein_coding | 6.66  | 6.65  | 6.61  | 6.66  | 5.56  | 5.38  | 4.67  | 5.44  |
| Up   | ENSMUSG00000062591  | 1.04  | 7.68E-16 | Tubb4a        | protein_coding | 11.40 | 11.26 | 11.39 | 11.42 | 12.34 | 12.11 | 12.55 | 12.57 |
| Up   | ENSMUSG00000008348  | 1.25  | 7.78E-16 | Ubc           | protein_coding | 7.59  | 7.16  | 7.41  | 7.34  | 8.81  | 8.32  | 7.83  | 8.53  |
| Down | ENSMUSG00000027378  | -1.26 | 7.80E-16 | Nphp1         | protein_coding | 7.25  | 7.29  | 7.47  | 7.20  | 6.38  | 5.80  | 5.64  | 6.42  |
| Down | ENSMUSG00000027985  | -2.54 | 8.02E-16 | Lef1          | protein_coding | 5.41  | 5.59  | 5.31  | 5.77  | 2.90  | 3.33  | 3.00  | 4.28  |
| Up   | ENSMUSG00000030786  | 2.07  | 8.06E-16 | Irfam         | protein_coding | 6.75  | 6.72  | 6.34  | 6.20  | 3.73  | 5.14  | 4.71  | 4.61  |
| Up   | ENSMUSG00000079598  | 1.02  | 8.06E-16 | Clec2l        | protein_coding | 7.69  | 7.65  | 7.67  | 7.44  | 8.42  | 8.64  | 8.95  | 8.40  |
| Down | ENSMUSG00000025978  | -1.55 | 8.36E-16 | Rftn2         | protein_coding | 8.15  | 7.98  | 7.80  | 8.17  | 7.11  | 6.20  | 6.03  | 6.52  |
| Down | ENSMUSG00000023019  | -1.15 | 8.40E-16 | Gpd1          | protein_coding | 8.96  | 8.76  | 8.72  | 8.38  | 7.92  | 7.43  | 7.60  | 7.34  |
| Down | ENSMUSG00000046101  | -2.72 | 9.06E-16 | Mcmdc2        | protein_coding | 4.75  | 4.47  | 4.30  | 4.74  | 2.74  | 2.53  | 2.45  | 3.34  |
| Down | ENSMUSG00000027583  | -1.37 | 1.02E-15 | Zbtb46        | protein_coding | 6.43  | 5.97  | 6.11  | 6.28  | 4.97  | 5.07  | 4.50  | 5.20  |
| Down | ENSMUSG00000033966  | -3.23 | 1.03E-15 | Cdk4          | protein_coding | 7.34  | 7.63  | 7.34  | 7.31  | 3.96  | 4.47  | 3.00  | 5.36  |
| Up   | ENSMUSG00000043518  | 1.34  | 1.15E-15 | Rai2          | protein_coding | 5.81  | 5.47  | 5.73  | 5.82  | 6.87  | 7.29  | 6.73  | 7.00  |
| Down | ENSMUSG00000049511  | -1.41 | 1.16E-15 | Htr1b         | protein_coding | 7.02  | 7.09  | 6.66  | 6.78  | 5.49  | 6.03  | 5.33  | 5.29  |
| Down | ENSMUSG00000064246  | -3.21 | 1.18E-15 | Chil1         | protein_coding | 5.28  | 4.79  | 5.95  | 5.29  | 3.38  | 2.90  | 2.90  | 3.38  |
| Up   | ENSMUSG00000036764  | 1.25  | 1.25E-15 | Dnajc12       | protein_coding | 5.85  | 5.72  | 5.68  | 5.89  | 6.85  | 6.84  | 7.04  | 6.85  |
| Up   | ENSMUSG00000049112  | 1.37  | 1.30E-15 | Oxtr          | protein_coding | 6.02  | 6.10  | 5.68  | 6.44  | 7.27  | 7.61  | 7.37  | 7.36  |
| Up   | ENSMUSG00000027985  | 1.02  | 1.32E-15 | Asns          | protein_coding | 7.87  | 7.89  | 7.82  | 7.82  | 6.84  | 6.76  | 6.84  | 6.86  |
| Down | ENSMUSG00000028152  | 3.62  | 1.43E-15 | Ccn1          | protein_coding | 4.62  | 5.02  | 4.20  | 4.20  | 2.00  | 2.92  | 2.00  | 2.85  |
| Down | ENSMUSG00000037315  | -1.53 | 1.43E-15 | Jade3         | protein_coding | 6.39  | 6.70  | 6.63  | 6.70  | 5.12  | 5.70  | 4.43  | 5.23  |
| Up   | ENSMUSG00000042761  | 2.20  | 1.48E-15 | Mrap2         | protein_coding | 4.77  | 4.27  | 5.07  | 4.67  | 6.43  | 6.90  | 6.37  | 7.12  |
| Down | ENSMUSG00000046410  | -3.02 | 1.62E-15 | Kcnk6         | protein_coding | 5.24  | 5.02  | 4.95  | 4.60  | 2.78  | 2.78  | 2.63  | 3.39  |
| Down | ENSMUSG00000031375  | -3.27 | 1.71E-15 | Bgn           | protein_coding | 5.44  | 5.19  | 6.00  | 6.42  | 3.60  | 2.53  | 3.00  | 3.62  |
| Down | ENSMUSG00000031939  | -1.34 | 1.86E-15 | Taf1d         | protein_coding | 7.46  | 7.34  | 7.35  | 7.63  | 5.56  | 6.55  | 5.85  | 6.65  |
| Up   | ENSMUSG00000015806  | 1.05  | 1.97E-15 | Odrp          | protein_coding | 9.22  | 8.94  | 9.22  | 9.19  | 10.43 | 9.61  | 10.19 | 10.41 |
| Up   | ENSMUSG00000002379  | 1.07  | 1.99E-15 | Ndufa11       | protein_coding | 7.90  | 7.91  | 7.85  | 7.96  | 9.11  | 8.82  | 9.13  | 8.76  |
| Down | ENSMUSG00000047361  | -1.68 | 2.15E-15 | Gm973         | protein_coding | 6.47  | 6.58  | 6.26  | 6.54  | 4.74  | 5.29  | 4.43  | 5.08  |
| Down | ENSMUSG00000052392  | -2.17 | 2.26E-15 | Acot4         | protein_coding | 5.64  | 5.76  | 6.07  | 5.96  | 3.45  | 3.65  | 4.77  | 3.74  |
| Down | ENSMUSG00000026031  | -1.80 | 2.32E-15 | Cflar         | protein_coding | 7.56  | 7.50  | 7.62  | 7.74  | 5.27  | 6.26  | 5.07  | 6.44  |
| Down | ENSMUSG00000031760  | -1.09 | 2.44E-15 | Mt3           | protein_coding | 9.92  | 9.75  | 9.87  | 9.81  | 8.94  | 8.47  | 8.97  | 8.57  |
| Down | ENSMUSG00000030341  | -2.95 | 2.58E-15 | Tnfrsf1a      | protein_coding | 5.60  | 5.44  | 5.40  | 5.88  | 2.37  | 3.47  | 3.19  | 3.74  |
| Up   | ENSMUSG00000047988  | 1.06  | 2.66E-15 | 493342G20Rik  | protein_coding | 6.27  | 6.39  | 6.11  | 6.06  | 7.50  | 7.06  | 7.27  | 7.27  |
| Down | ENSMUSG00000020961  | -1.64 | 2.72E-15 | Ston2         | protein_coding |       |       |       |       |       |       |       |       |

|      |                     |       |          |               |                |       |       |       |       |       |       |       |       |
|------|---------------------|-------|----------|---------------|----------------|-------|-------|-------|-------|-------|-------|-------|-------|
| Up   | ENSMUSG00000036636  | 1.01  | 3.14E-15 | Cln7          | protein_coding | 7.81  | 7.37  | 7.30  | 7.30  | 8.42  | 8.41  | 8.56  | 8.42  |
| Down | ENSMUSG00000028766  | -3.62 | 3.26E-15 | Alpl          | protein_coding | 5.00  | 4.64  | 4.34  | 4.63  | 2.66  | 2.44  | 2.54  | 2.44  |
| Down | ENSMUSG00000039519  | -2.16 | 3.83E-15 | Cyp7b1        | protein_coding | 6.42  | 6.59  | 6.63  | 6.49  | 6.63  | 3.98  | 4.63  | 4.92  |
| Down | ENSMUSG00000041617  | -1.18 | 4.08E-15 | Ccdc74a       | protein_coding | 7.52  | 7.50  | 7.72  | 7.80  | 6.67  | 6.25  | 6.54  | 6.30  |
| Down | ENSMUSG00000030307  | -1.25 | 4.33E-15 | Sic6a11       | protein_coding | 8.56  | 8.74  | 8.70  | 8.89  | 6.98  | 7.79  | 7.06  | 7.90  |
| Down | ENSMUSG00000040747  | -4.14 | 4.67E-15 | Cd53          | protein_coding | 5.08  | 4.69  | 4.52  | 4.94  | 2.66  | 2.34  | 2.02  | 2.62  |
| Down | ENSMUSG00000030002  | -1.12 | 5.14E-15 | Dusp11        | protein_coding | 7.71  | 8.16  | 8.15  | 7.93  | 6.59  | 6.67  | 6.59  | 6.89  |
| Up   | ENSMUSG00000019863  | 1.23  | 5.71E-15 | Ors11         | protein_coding | 5.83  | 6.11  | 5.87  | 5.75  | 6.80  | 7.14  | 6.96  | 7.32  |
| Down | ENSMUSG00000066258  | -3.08 | 5.98E-15 | Trim12a       | protein_coding | 5.48  | 5.14  | 5.02  | 5.40  | 2.97  | 3.47  | 2.00  | 3.23  |
| Down | ENSMUSG00000060771  | -1.07 | 6.38E-15 | Tsga10        | protein_coding | 7.87  | 7.87  | 6.81  | 8.00  | 6.81  | 7.27  | 6.42  | 6.81  |
| Down | ENSMUSG00000023027  | -1.26 | 6.99E-15 | Atf1          | protein_coding | 6.93  | 6.63  | 6.92  | 6.99  | 6.07  | 5.43  | 5.64  | 5.50  |
| Down | ENSMUSG00000050074  | -3.78 | 7.27E-15 | Spink8        | protein_coding | 5.39  | 5.10  | 5.42  | 4.45  | 2.00  | 3.22  | 2.00  | 2.92  |
| Up   | ENSMUSG00000049191  | 1.24  | 8.00E-15 | Rtl5          | protein_coding | 6.39  | 6.50  | 6.63  | 6.62  | 7.89  | 7.75  | 7.71  | 7.60  |
| Up   | ENSMUSG00000071176  | 1.01  | 8.00E-15 | Arhgef10      | protein_coding | 8.32  | 8.30  | 8.27  | 8.04  | 9.65  | 8.91  | 9.16  | 9.12  |
| Down | ENSMUSG00000042770  | -1.49 | 8.18E-15 | Hebp1         | protein_coding | 7.13  | 6.89  | 6.91  | 7.06  | 6.01  | 4.97  | 5.34  | 5.81  |
| Down | ENSMUSG00000068263  | -1.32 | 8.67E-15 | Efoc1         | protein_coding | 6.44  | 6.19  | 6.30  | 6.23  | 4.88  | 4.90  | 4.92  | 5.50  |
| Down | ENSMUSG00000110333  | -2.54 | 8.96E-15 | Gm45861       | protein_coding | 5.50  | 5.62  | 5.89  | 5.70  | 3.45  | 3.73  | 3.45  | 3.74  |
| Down | ENSMUSG00000021567  | -2.08 | 8.97E-15 | Nkd2          | protein_coding | 5.95  | 6.12  | 6.31  | 5.92  | 4.01  | 4.01  | 4.24  | 4.75  |
| Down | ENSMUSG00000013594  | -3.14 | 9.28E-15 | Aldh1a2       | protein_coding | 5.69  | 5.47  | 5.74  | 5.79  | 2.57  | 3.69  | 3.50  | 2.85  |
| Down | ENSMUSG00000041941  | -1.39 | 1.14E-14 | Rpi37         | protein_coding | 10.41 | 10.21 | 10.35 | 10.51 | 9.19  | 8.63  | 8.97  | 8.90  |
| Down | ENSMUSG00000029338  | -2.19 | 1.17E-14 | Anbx2         | protein_coding | 5.02  | 5.25  | 5.13  | 5.24  | 4.00  | 3.37  | 3.07  | 3.29  |
| Down | ENSMUSG00000074227  | -2.52 | 1.18E-14 | Spint2        | protein_coding | 6.63  | 6.33  | 6.44  | 7.15  | 3.64  | 4.37  | 3.75  | 5.23  |
| Down | ENSMUSG00000071379  | -1.34 | 1.23E-14 | Hpcal1        | protein_coding | 7.29  | 7.54  | 7.32  | 7.96  | 5.64  | 6.37  | 6.46  | 6.41  |
| Down | ENSMUSG00000033446  | -1.97 | 1.30E-14 | Lpar6         | protein_coding | 5.31  | 5.19  | 5.42  | 4.89  | 3.96  | 3.61  | 3.24  | 3.66  |
| Down | ENSMUSG00000022122  | -1.81 | 1.35E-14 | Ednrb         | protein_coding | 7.23  | 7.06  | 7.63  | 7.90  | 5.37  | 5.79  | 5.10  | 6.44  |
| Down | ENSMUSG00000075707  | -4.11 | 1.36E-14 | Dio3          | protein_coding | 4.48  | 4.61  | 4.57  | 5.09  | 2.57  | 2.53  | 2.00  | 2.44  |
| Down | ENSMUSG00000016087  | -2.16 | 1.41E-14 | Fil1          | protein_coding | 4.93  | 5.25  | 4.82  | 5.22  | 3.55  | 3.77  | 3.30  | 2.85  |
| Down | ENSMUSG00000065947  | -4.37 | 1.44E-14 | mt-Nd4l       | protein_coding | 4.57  | 4.67  | 4.95  | 5.11  | 2.66  | 2.00  | 2.00  | 2.70  |
| Up   | ENSMUSG00000115232  | 1.12  | 1.45E-14 | Gm49378       | protein_coding | 7.57  | 7.60  | 7.61  | 7.28  | 8.48  | 8.51  | 8.92  | 8.52  |
| Down | ENSMUSG00000045083  | -1.02 | 1.56E-14 | Lingo2        | protein_coding | 7.55  | 7.96  | 7.59  | 7.75  | 6.39  | 6.63  | 7.05  | 6.77  |
| Up   | ENSMUSG00000025597  | 1.24  | 1.59E-14 | Klh4          | protein_coding | 6.36  | 6.00  | 6.22  | 6.53  | 7.60  | 7.28  | 7.67  | 7.38  |
| Down | ENSMUSG00000078451  | -2.33 | 1.73E-14 | Ppi6          | protein_coding | 4.87  | 5.21  | 4.75  | 4.96  | 2.25  | 3.33  | 3.54  | 3.44  |
| Down | ENSMUSG00000049649  | -2.05 | 1.75E-14 | Gpr3          | protein_coding | 5.38  | 5.17  | 4.90  | 5.65  | 7.10  | 6.63  | 6.87  | 6.87  |
| Up   | ENSMUSG00000029398  | 1.30  | 1.82E-14 | Anx2          | protein_coding | 6.66  | 6.33  | 6.60  | 6.63  | 7.78  | 6.60  | 8.06  | 7.66  |
| Up   | ENSMUSG00000055214  | 1.71  | 1.84E-14 | Pld5          | protein_coding | 5.23  | 5.63  | 5.63  | 5.62  | 6.53  | 7.26  | 7.04  | 7.61  |
| Down | ENSMUSG000000687594 | -2.12 | 1.87E-14 | Krt77         | protein_coding | 5.41  | 5.66  | 5.78  | 6.45  | 4.03  | 3.61  | 4.00  | 4.46  |
| Down | ENSMUSG00000044986  | -1.82 | 2.04E-14 | Tst           | protein_coding | 5.55  | 5.97  | 5.92  | 5.83  | 4.19  | 3.89  | 4.16  | 4.74  |
| Up   | ENSMUSG00000053297  | 1.08  | 2.20E-14 | AI854703      | protein_coding | 7.05  | 6.95  | 6.77  | 6.73  | 8.07  | 7.98  | 7.94  | 7.73  |
| Up   | ENSMUSG00000054453  | 1.13  | 2.34E-14 | Sytl5         | protein_coding | 5.94  | 6.26  | 6.12  | 6.39  | 7.47  | 7.23  | 7.29  | 7.08  |
| Down | ENSMUSG00000030380  | -1.30 | 2.48E-14 | Mzf1          | protein_coding | 6.47  | 6.19  | 6.61  | 6.36  | 5.40  | 5.04  | 5.36  | 5.03  |
| Down | ENSMUSG00000042190  | -3.31 | 2.70E-14 | Cmkir1        | protein_coding | 5.00  | 4.93  | 5.29  | 4.74  | 2.25  | 2.70  | 2.71  | 3.23  |
| Up   | ENSMUSG00000001520  | 1.11  | 2.74E-14 | Nrip2         | protein_coding | 6.69  | 6.52  | 7.91  | 6.83  | 7.91  | 7.68  | 7.81  | 7.51  |
| Down | ENSMUSG00000069372  | -4.37 | 2.92E-14 | Cbx3          | protein_coding | 4.93  | 4.72  | 4.40  | 5.44  | 2.00  | 2.24  | 2.00  | 3.06  |
| Down | ENSMUSG00000036887  | -3.75 | 2.94E-14 | C1qa          | protein_coding | 7.63  | 7.28  | 6.69  | 6.78  | 4.52  | 3.87  | 3.24  | 3.29  |
| Down | ENSMUSG00000061838  | -2.15 | 2.97E-14 | Suc1g2        | protein_coding | 6.25  | 5.99  | 6.33  | 6.09  | 6.25  | 4.49  | 3.67  | 4.81  |
| Down | ENSMUSG00000022235  | -2.12 | 3.00E-14 | Cmb1          | protein_coding | 5.65  | 5.86  | 5.93  | 6.01  | 3.77  | 4.66  | 3.19  | 4.17  |
| Down | ENSMUSG00000029646  | -1.26 | 3.05E-14 | Rfc5          | protein_coding | 8.60  | 8.60  | 8.72  | 8.03  | 6.04  | 6.03  | 7.36  | 7.08  |
| Up   | ENSMUSG00000041632  | 1.10  | 3.42E-14 | Mrs27         | protein_coding | 6.71  | 6.55  | 6.65  | 7.90  | 6.65  | 7.79  | 7.79  | 7.41  |
| Up   | ENSMUSG00000034216  | 1.01  | 3.46E-14 | Vps18         | protein_coding | 6.89  | 7.37  | 7.06  | 7.07  | 8.10  | 7.90  | 8.32  | 8.04  |
| Down | ENSMUSG00000030711  | -2.26 | 3.61E-14 | Sult1a1       | protein_coding | 5.38  | 5.60  | 5.05  | 4.89  | 3.35  | 4.04  | 2.71  | 3.48  |
| Down | ENSMUSG00000043279  | -1.46 | 4.02E-14 | Trim56        | protein_coding | 5.98  | 6.06  | 6.18  | 6.12  | 4.33  | 4.87  | 4.33  | 4.68  |
| Up   | ENSMUSG00000055424  | 1.23  | 4.15E-14 | Gm9970        | protein_coding | 5.54  | 5.81  | 5.52  | 5.66  | 6.84  | 6.71  | 6.64  | 6.98  |
| Down | ENSMUSG00000048747  | -2.54 | 4.15E-14 | E130114P18Rik | protein_coding | 6.54  | 6.45  | 6.39  | 6.39  | 4.10  | 4.30  | 2.71  | 4.90  |
| Down | ENSMUSG00000045776  | -2.61 | 4.18E-14 | Ltrm1         | protein_coding | 4.03  | 4.31  | 4.80  | 4.78  | 2.25  | 2.70  | 2.86  | 3.29  |
| Down | ENSMUSG00000016520  | -1.54 | 4.21E-14 | Lnx2          | protein_coding | 5.64  | 5.63  | 5.48  | 5.79  | 4.66  | 4.13  | 3.94  | 4.41  |
| Down | ENSMUSG00000046805  | -2.07 | 4.36E-14 | Mpeg1         | protein_coding | 5.81  | 6.15  | 6.21  | 6.13  | 4.54  | 4.27  | 4.22  | 3.99  |
| Up   | ENSMUSG00000026507  | 1.07  | 4.37E-14 | Aldh18a1      | protein_coding | 6.20  | 6.20  | 6.33  | 7.21  | 6.54  | 7.36  | 7.42  | 7.41  |
| Down | ENSMUSG00000036206  | -1.63 | 4.59E-14 | Sh3bp4        | protein_coding | 7.20  | 7.33  | 7.17  | 7.19  | 5.90  | 4.80  | 6.00  | 5.79  |
| Down | ENSMUSG00000036362  | -3.60 | 4.75E-14 | Pzry13        | protein_coding | 5.12  | 5.15  | 5.45  | 5.49  | 3.23  | 2.00  | 2.00  | 3.30  |
| Down | ENSMUSG00000029846  | -1.48 | 4.79E-14 | Rflnb         | protein_coding | 6.35  | 6.07  | 6.30  | 6.33  | 4.74  | 5.34  | 4.50  | 4.50  |
| Up   | ENSMUSG00000015107  | 1.33  | 4.79E-14 | Htp3          | protein_coding | 5.94  | 6.14  | 6.03  | 6.43  | 7.29  | 7.67  | 7.36  | 7.36  |
| Down | ENSMUSG00000029781  | -1.58 | 5.02E-14 | Fkbp9         | protein_coding | 7.01  | 6.93  | 6.95  | 7.07  | 5.84  | 4.87  | 5.84  | 5.65  |
| Down | ENSMUSG00000015950  | -2.83 | 5.21E-14 | Ncf1          | protein_coding | 5.80  | 5.40  | 5.43  | 5.82  | 3.85  | 2.00  | 3.50  | 3.57  |
| Up   | ENSMUSG00000045975  | 1.12  | 5.45E-14 | C2cd2         | protein_coding | 6.67  | 6.64  | 6.73  | 7.82  | 6.71  | 7.92  | 7.56  | 7.66  |
| Down | ENSMUSG00000018648  | -1.14 | 5.55E-14 | Dusp14        | protein_coding | 6.96  | 7.07  | 6.86  | 7.08  | 5.50  | 6.10  | 6.25  | 5.63  |
| Down | ENSMUSG00000040372  | -1.25 | 5.56E-14 | Gpr63         | protein_coding | 6.77  | 6.82  | 6.68  | 6.70  | 5.86  | 5.31  | 5.86  | 5.55  |
| Down | ENSMUSG00000026062  | -1.56 | 5.63E-14 | Sic9a2        | protein_coding | 7.03  | 7.14  | 6.98  | 6.61  | 4.99  | 5.57  | 5.73  | 5.52  |
| Down | ENSMUSG00000029337  | -3.08 | 5.88E-14 | Fgf5          | protein_coding | 5.89  | 5.28  | 5.94  | 5.25  | 2.74  | 2.85  | 3.35  | 3.74  |
| Down | ENSMUSG00000052387  | -1.42 | 5.95E-14 | Trpm3         | protein_coding | 9.89  | 9.47  | 9.35  | 10.26 | 8.11  | 8.15  | 8.36  | 8.80  |
| Down | ENSMUSG00000026921  | -1.18 | 6.01E-14 | Egfl7         | protein_coding | 6.14  | 6.59  | 6.35  | 5.37  | 6.26  | 5.21  | 5.26  | 5.35  |
| Down | ENSMUSG00000020037  | -1.99 | 6.22E-14 | Rfx4          | protein_coding | 6.14  | 6.12  | 6.08  | 6.03  | 3.40  | 4.64  | 3.90  | 4.95  |
| Down | ENSMUSG00000021221  | -1.43 | 6.58E-14 | Dp3           | protein_coding | 6.83  | 6.85  | 7.04  | 6.78  | 5.90  | 5.27  | 4.94  | 5.81  |
| Down | ENSMUSG00000036914  | -1.95 | 6.69E-14 | Sloc20a       | protein_coding | 5.36  | 5.95  | 5.49  | 5.49  | 3.52  | 3.97  | 4.25  | 4.25  |
| Down | ENSMUSG00000023359  | -2.14 | 6.71E-14 | Ct81          | protein_coding | 5.21  | 5.29  | 5.06  | 5.27  | 5.45  | 6.81  | 4.04  | 2.92  |
| Up   | ENSMUSG00000020363  | 1.65  | 6.81E-14 | Cfp2          | protein_coding | 5.19  | 5.44  | 5.94  | 5.53  | 5.95  | 7.06  | 5.72  | 7.17  |
| Up   | ENSMUSG00000030170  | 1.94  | 7.39E-14 | Wnt5b         | protein_coding | 4.57  | 4.82  | 4.27  | 4.19  | 6.22  | 6.12  | 6.31  | 6.18  |
| Down | ENSMUSG00000019761  | -2.00 | 7.63E-14 | Krt10         | protein_coding | 6.30  | 6.05  | 6.05  | 5.90  | 4.86  | 4.13  | 3.75  | 4.31  |
| Down | ENSMUSG00000060519  | -1.68 | 7.64E-14 | Tor3a         | protein_coding | 5.15  | 5.56  | 5.40  | 5.78  | 3.89  | 4.16  | 4.07  | 4.14  |
| Down | ENSMUSG00000004266  | -2.94 | 8.03E-14 | Ptpn6         | protein_coding | 4.82  | 4.56  | 4.46  | 4.76  | 3.40  | 2.70  | 2.24  | 2.44  |
| Up   | ENSMUSG00000026864  | 1.00  | 8.53E-14 | Hspa5         | protein_coding | 10.07 | 9.75  | 9.29  | 9.69  | 10.94 | 10.87 | 10.47 | 10.57 |
| Up   | ENSMUSG00000034226  | 1.43  | 9.05E-14 | Rhov          | protein_coding | 5.38  | 5.41  | 5.45  | 4.87  | 6.70  | 6.66  | 6.57  | 6.57  |
| Up   | ENSMUSG00000091811  | 1.14  | 9.66E-14 | Inafm1        | protein_coding | 6.21  | 6.45  | 6.65  | 6.39  | 7.38  | 7.49  | 7.47  | 7.34  |
| Up   | ENSMUSG00000036422  | 1.03  | 9.82E-14 | Pcdh8         | protein_coding | 7.54  | 7.50  | 7.65  | 7.39  | 8.40  | 8.48  | 8.48  | 8.78  |
| Down | ENSMUSG00000059182  | -1.51 | 9.90E-14 | Skap2         | protein_coding | 6.71  | 6.78  | 6.65  | 6.75  | 5.44  | 4.97  | 4.95  | 5.72  |
| Up   | ENSMUSG00000020067  | 1.89  | 9.96E-14 | Mypn          | protein_coding | 4.65  | 4.47  | 4.65  | 5.14  | 6.23  | 6.53  | 6.74  | 6.37  |
| Down | ENSMUSG00000044080  | -1.73 | 1.01E-13 | S100a1        | protein_coding | 7.47  | 7.49  | 7.32  | 7.52  | 6.26  | 4.90  | 5.88  | 5.82  |
| Up   | ENSMUSG00000033522  | 1.27  | 1.02E-13 | Absc7         | protein_coding | 5.78  | 5.23  | 5.63  | 6.23  | 6.92  | 6.77  | 6.92  | 6.92  |
| Up   | ENSMUSG00000020086  | 1.03  | 1.14E-13 | H2afy2</      |                |       |       |       |       |       |       |       |       |

|      |                    |       |          |               |                |      |          |      |       |      |      |      |      |
|------|--------------------|-------|----------|---------------|----------------|------|----------|------|-------|------|------|------|------|
| Down | ENSMUSG00000025739 | -2.01 | 1.20E-13 | Gng13         | protein_coding | 7.17 | 7.03     | 7.33 | 7.40  | 5.49 | 5.40 | 5.30 | 5.41 |
| Up   | ENSMUSG00000030043 | 1.90  | 1.27E-13 | Tacr1         | protein_coding | 4.51 | 5.04     | 4.91 | 5.00  | 6.59 | 6.79 | 6.41 | 6.68 |
| Down | ENSMUSG00000029089 | -1.49 | 1.37E-13 | 5730480H06Rik | protein_coding | 6.80 | 7.01     | 6.81 | 7.14  | 4.52 | 5.77 | 5.92 | 5.59 |
| Down | ENSMUSG00000040562 | -3.46 | 1.44E-13 | C3ar1         | protein_coding | 4.77 | 4.74     | 4.43 | 4.37  | 2.00 | 2.53 | 2.71 | 2.78 |
| Down | ENSMUSG00000028015 | -1.89 | 1.45E-13 | Ctso          | protein_coding | 6.92 | 6.90     | 7.11 | 7.08  | 5.34 | 4.87 | 4.35 | 5.91 |
| Up   | ENSMUSG00000041046 | 1.98  | 1.46E-13 | Ramp3         | protein_coding | 4.42 | 4.09     | 4.37 | 4.25  | 5.79 | 5.71 | 6.18 | 6.32 |
| Up   | ENSMUSG00000019647 | 1.05  | 1.46E-13 | Simsd1        | protein_coding | 8.03 | 7.95     | 8.14 | 8.44  | 9.32 | 9.32 | 9.16 | 9.45 |
| Down | ENSMUSG00000058936 | -2.06 | 1.55E-13 | Slc14a1       | protein_coding | 6.28 | 5.58     | 6.26 | 6.16  | 4.59 | 3.69 | 4.45 | 4.25 |
| Down | ENSMUSG00000036356 | -1.17 | 1.61E-13 | Csgalnac1     | protein_coding | 6.51 | 6.49     | 6.61 | 7.04  | 5.12 | 5.64 | 5.63 | 5.85 |
| Down | ENSMUSG00000010797 | -2.58 | 1.68E-13 | Wnt2          | protein_coding | 5.44 | 5.12     | 5.37 | 5.28  | 2.97 | 2.98 | 3.83 | 3.29 |
| Down | ENSMUSG00000022342 | -2.58 | 1.75E-13 | Kcnv1         | protein_coding | 7.43 | 7.53     | 7.54 | 7.57  | 4.74 | 5.95 | 4.13 | 4.90 |
| Down | ENSMUSG00000025537 | -1.42 | 1.84E-13 | Phkg1         | protein_coding | 6.27 | 6.46     | 6.36 | 6.21  | 5.01 | 4.66 | 5.07 | 5.29 |
| Down | ENSMUSG00000041797 | -1.37 | 1.96E-13 | Abca9         | protein_coding | 6.39 | 6.20     | 6.17 | 6.11  | 5.33 | 4.78 | 4.71 | 4.95 |
| Up   | ENSMUSG00000034037 | 1.78  | 2.00E-13 | Fgd5          | protein_coding | 5.15 | 5.26     | 4.93 | 5.45  | 6.37 | 7.27 | 6.39 | 7.22 |
| Down | ENSMUSG00000024900 | -1.71 | 2.22E-13 | Cpt1a         | protein_coding | 6.24 | 6.13     | 6.29 | 6.16  | 4.56 | 4.97 | 4.13 | 4.87 |
| Down | ENSMUSG00000030031 | -1.30 | 2.25E-13 | Kbtbd8        | protein_coding | 6.66 | 6.59     | 6.93 | 6.62  | 4.76 | 5.56 | 5.88 | 5.52 |
| Down | ENSMUSG00000028082 | -1.12 | 2.32E-13 | Sh3d19        | protein_coding | 8.30 | 7.82     | 8.12 | 8.35  | 7.35 | 6.54 | 6.84 | 7.36 |
| Down | ENSMUSG00000022176 | -1.90 | 2.33E-13 | Rem2          | protein_coding | 6.14 | 5.91     | 6.06 | 6.06  | 4.34 | 4.44 | 3.45 | 4.66 |
| Down | ENSMUSG00000022899 | -1.85 | 2.55E-13 | Slc15a2       | protein_coding | 6.72 | 6.88     | 6.63 | 6.87  | 4.42 | 4.58 | 5.34 | 5.58 |
| Down | ENSMUSG00000023264 | -1.09 | 2.70E-13 | Fstl4         | protein_coding | 6.51 | 6.22     | 6.74 | 6.52  | 5.25 | 5.29 | 5.70 | 5.66 |
| Up   | ENSMUSG00000052364 | 1.02  | 2.73E-13 | B630019K06Rik | protein_coding | 7.29 | 7.37     | 6.99 | 7.31  | 8.15 | 8.33 | 8.15 | 8.08 |
| Up   | ENSMUSG00000054204 | 2.30  | 2.92E-13 | Alkal2        | protein_coding | 5.04 | 4.56     | 4.65 | 4.39  | 6.70 | 6.50 | 7.31 | 6.48 |
| Up   | ENSMUSG00000039997 | -2.27 | 2.99E-13 | Ifi203        | protein_coding | 5.21 | 5.28     | 4.97 | 4.94  | 3.40 | 3.56 | 3.13 | 3.34 |
| Up   | ENSMUSG00000032763 | 1.83  | 3.43E-13 | Ilvl1         | protein_coding | 5.41 | 5.00     | 5.68 | 5.82  | 7.14 | 7.25 | 7.52 | 7.06 |
| Up   | ENSMUSG00000032590 | 1.58  | 3.48E-13 | Apeh          | protein_coding | 5.80 | 5.28     | 5.74 | 5.63  | 6.62 | 7.42 | 7.20 | 7.17 |
| Down | ENSMUSG00000026072 | -1.35 | 3.66E-13 | Il1r1         | protein_coding | 6.62 | 6.97     | 6.98 | 6.75  | 5.71 | 5.68 | 5.07 | 5.70 |
| Down | ENSMUSG00000030917 | -1.71 | 3.87E-13 | Tmem159       | protein_coding | 5.90 | 5.68     | 5.90 | 5.90  | 4.31 | 4.27 | 4.61 | 4.17 |
| Down | ENSMUSG00000071719 | -1.01 | 3.89E-13 | Tmem28        | protein_coding | 8.32 | 8.14     | 8.07 | 8.16  | 7.37 | 7.35 | 7.05 | 6.89 |
| Down | ENSMUSG00000044250 | -1.62 | 4.12E-13 | Pced1b        | protein_coding | 5.69 | 5.53     | 5.98 | 5.57  | 4.54 | 4.13 | 3.79 | 4.59 |
| Down | ENSMUSG00000024135 | -3.46 | 4.14E-13 | Srbd1         | protein_coding | 3.81 | 3.83     | 4.37 | 3.94  | 2.66 | 2.62 | 2.00 | 2.00 |
| Down | ENSMUSG00000027552 | -2.07 | 4.85E-13 | E2f5          | protein_coding | 6.30 | 6.21     | 6.57 | 6.36  | 3.98 | 3.98 | 4.83 | 5.10 |
| Up   | ENSMUSG00000014633 | 1.27  | 5.09E-13 | Cmc2          | protein_coding | 6.00 | 6.19     | 5.82 | 5.71  | 7.27 | 7.12 | 7.04 | 7.19 |
| Up   | ENSMUSG00000021964 | 1.00  | 5.31E-13 | Wnt5a         | protein_coding | 6.58 | 6.90     | 6.57 | 7.44  | 6.77 | 7.44 | 7.86 | 7.46 |
| Up   | ENSMUSG00000036242 | 1.02  | 5.32E-13 | Nrm4          | protein_coding | 7.84 | 8.05     | 7.54 | 7.76  | 9.06 | 9.02 | 8.49 | 8.61 |
| Down | ENSMUSG00000025050 | -1.37 | 5.32E-13 | Pcgf6         | protein_coding | 6.42 | 6.85     | 6.58 | 6.78  | 5.04 | 5.44 | 5.05 | 5.85 |
| Down | ENSMUSG00000038766 | -1.02 | 5.35E-13 | Gabpb2        | protein_coding | 7.58 | 7.80     | 7.79 | 7.60  | 6.84 | 6.43 | 7.09 | 6.67 |
| Down | ENSMUSG00000028188 | -1.56 | 5.52E-13 | Spata1        | protein_coding | 5.34 | 5.58     | 5.56 | 5.86  | 4.13 | 4.22 | 4.50 | 4.14 |
| Down | ENSMUSG00000009057 | -2.00 | 5.62E-13 | Mmp14         | protein_coding | 6.24 | 5.86     | 6.03 | 5.95  | 4.04 | 3.84 | 3.75 | 5.00 |
| Down | ENSMUSG00000042312 | -1.69 | 5.70E-13 | S100a13       | protein_coding | 6.90 | 6.55     | 6.48 | 6.48  | 5.73 | 4.42 | 4.63 | 5.08 |
| Up   | ENSMUSG00000075592 | 1.48  | 5.86E-13 | Nynrin        | protein_coding | 6.11 | 5.96     | 5.68 | 6.29  | 7.57 | 7.58 | 7.39 | 7.21 |
| Up   | ENSMUSG00000034949 | 1.04  | 6.06E-13 | Zfr2          | protein_coding | 7.74 | 7.89     | 7.81 | 7.56  | 8.95 | 8.93 | 8.57 | 8.61 |
| Up   | ENSMUSG00000060594 | 1.49  | 6.41E-13 | Layn          | protein_coding | 5.19 | 5.10     | 5.46 | 4.85  | 6.45 | 6.69 | 6.36 | 6.36 |
| Down | ENSMUSG00000032006 | -2.85 | 6.45E-13 | Pdgfd         | protein_coding | 5.47 | 5.76     | 4.95 | 5.53  | 2.82 | 3.43 | 3.24 | 3.44 |
| Down | ENSMUSG00000040605 | -2.53 | 6.62E-13 | Bace2         | protein_coding | 5.10 | 5.55     | 5.22 | 5.49  | 2.97 | 3.43 | 2.45 | 4.11 |
| Down | ENSMUSG00000042540 | -4.00 | 6.67E-13 | Aco15         | protein_coding | 4.87 | 4.60     | 4.92 | 4.91  | 2.00 | 2.00 | 2.00 | 2.54 |
| Down | ENSMUSG00000026343 | -3.13 | 7.26E-13 | Gpr39         | protein_coding | 9.10 | 9.26     | 8.77 | 9.42  | 5.42 | 6.42 | 4.00 | 7.00 |
| Up   | ENSMUSG00000022224 | 1.04  | 7.49E-13 | Nbn           | protein_coding | 6.62 | 7.45E-13 | 6.76 | 6.24  | 6.64 | 7.81 | 7.89 | 7.29 |
| Up   | ENSMUSG00000038112 | 1.77  | 7.58E-13 | AW551984      | protein_coding | 5.26 | 5.25     | 4.85 | 5.72  | 7.05 | 7.12 | 6.67 | 7.00 |
| Up   | ENSMUSG00000036611 | 1.45  | 7.63E-13 | Eapd1         | protein_coding | 5.88 | 6.08     | 5.92 | 6.19  | 7.43 | 7.42 | 7.61 | 7.17 |
| Down | ENSMUSG00000056947 | -1.97 | 7.95E-13 | Mab21l1       | protein_coding | 4.57 | 4.27     | 5.13 | 4.42  | 3.11 | 2.98 | 3.67 | 2.99 |
| Down | ENSMUSG00000019789 | -2.25 | 8.01E-13 | Hey2          | protein_coding | 5.74 | 5.71     | 5.50 | 5.62  | 4.28 | 3.28 | 3.19 | 4.05 |
| Down | ENSMUSG00000018634 | -2.00 | 8.08E-13 | Chrr1         | protein_coding | 5.62 | 5.26     | 5.57 | 5.35  | 3.11 | 3.47 | 3.54 | 4.61 |
| Down | ENSMUSG00000031209 | -2.54 | 8.68E-13 | Heph          | protein_coding | 5.55 | 5.53     | 5.46 | 5.52  | 4.16 | 3.38 | 2.86 | 3.23 |
| Down | ENSMUSG00000045519 | -1.30 | 9.95E-13 | Zfp560        | protein_coding | 6.33 | 6.27     | 6.29 | 6.63  | 4.82 | 5.45 | 4.94 | 5.42 |
| Down | ENSMUSG00000029843 | -3.29 | 1.02E-12 | Slc13a4       | protein_coding | 6.59 | 6.02     | 5.80 | 6.67  | 2.47 | 3.77 | 4.48 | 4.87 |
| Up   | ENSMUSG00000024084 | 1.69  | 1.11E-12 | Oqct          | protein_coding | 5.31 | 5.70     | 5.46 | 5.52  | 7.09 | 6.79 | 7.46 | 6.98 |
| Up   | ENSMUSG00000037169 | 1.13  | 1.14E-12 | Mycn          | protein_coding | 5.70 | 5.93     | 5.78 | 5.98  | 6.98 | 7.08 | 7.04 | 6.53 |
| Down | ENSMUSG00000037465 | -3.57 | 1.21E-12 | Klf10         | protein_coding | 7.13 | 6.87     | 7.20 | 7.42  | 2.34 | 3.50 | 4.48 | 4.68 |
| Down | ENSMUSG00000044197 | -1.76 | 1.27E-12 | Gpr146        | protein_coding | 6.62 | 6.56     | 6.58 | 6.49  | 5.51 | 4.13 | 4.38 | 5.29 |
| Down | ENSMUSG00000022459 | -1.12 | 1.37E-12 | Rgs19         | protein_coding | 7.20 | 7.10     | 7.45 | 6.45  | 6.10 | 6.45 | 6.65 | 6.36 |
| Up   | ENSMUSG00000026209 | 1.15  | 1.40E-12 | Dnpep         | protein_coding | 6.68 | 6.51     | 6.66 | 6.69  | 7.86 | 7.86 | 7.81 | 7.66 |
| Down | ENSMUSG00000048561 | -2.55 | 1.40E-12 | Arsj          | protein_coding | 5.64 | 5.82     | 5.68 | 5.48  | 4.22 | 3.05 | 3.07 | 3.86 |
| Up   | ENSMUSG00000003546 | 1.27  | 1.41E-12 | Klc4          | protein_coding | 6.27 | 6.57     | 6.43 | 6.12  | 7.34 | 7.70 | 7.72 | 7.54 |
| Down | ENSMUSG00000024098 | -1.02 | 1.44E-12 | Twsg1         | protein_coding | 7.59 | 7.57     | 7.71 | 7.76  | 6.40 | 6.56 | 6.85 | 6.80 |
| Down | ENSMUSG00000041959 | -2.01 | 1.50E-12 | S100a10       | protein_coding | 6.49 | 6.09     | 5.93 | 6.89  | 4.97 | 3.73 | 4.69 | 4.68 |
| Down | ENSMUSG00000025270 | -2.26 | 1.55E-12 | Alas2         | protein_coding | 4.62 | 5.23     | 4.40 | 4.58  | 2.74 | 2.92 | 3.54 | 3.17 |
| Down | ENSMUSG00000045912 | -1.57 | 1.60E-12 | C2cd4c        | protein_coding | 5.29 | 6.03     | 5.48 | 5.89  | 4.16 | 4.35 | 4.22 | 4.57 |
| Down | ENSMUSG00000068566 | -1.01 | 1.61E-12 | Myadm         | protein_coding | 8.00 | 8.01     | 7.83 | 8.04  | 6.83 | 7.10 | 7.24 | 6.71 |
| Down | ENSMUSG00000061517 | -2.30 | 1.73E-12 | Sox21         | protein_coding | 6.58 | 6.19     | 6.13 | 6.19  | 4.97 | 3.84 | 3.07 | 4.46 |
| Down | ENSMUSG00000071180 | -1.13 | 1.95E-12 | Smim15        | protein_coding | 8.16 | 7.98     | 7.09 | 6.97  | 8.28 | 6.52 | 7.43 | 7.36 |
| Down | ENSMUSG00000042903 | -1.24 | 1.98E-12 | Foxo4         | protein_coding | 7.27 | 6.80     | 6.84 | 6.80  | 5.78 | 5.27 | 6.81 | 6.16 |
| Up   | ENSMUSG00000033249 | 1.41  | 1.99E-12 | Hsf4          | protein_coding | 6.13 | 5.59     | 5.67 | 5.88  | 7.08 | 7.20 | 7.12 | 7.29 |
| Down | ENSMUSG00000027524 | -2.99 | 1.99E-12 | Efn3          | protein_coding | 4.87 | 4.53     | 4.95 | 4.95  | 3.17 | 2.53 | 2.35 | 2.92 |
| Up   | ENSMUSG00000051013 | 1.05  | 2.08E-12 | Mkx           | protein_coding | 6.39 | 6.45     | 6.70 | 6.56  | 7.81 | 6.55 | 7.42 | 7.36 |
| Down | ENSMUSG00000026655 | -1.34 | 2.10E-12 | Fam107b       | protein_coding | 6.94 | 7.07     | 7.00 | 7.10  | 6.14 | 5.72 | 5.36 | 5.70 |
| Up   | ENSMUSG00000062300 | 1.95  | 2.18E-12 | Nectin2       | protein_coding | 4.98 | 4.34     | 5.52 | 5.33  | 6.75 | 7.23 | 6.73 | 6.93 |
| Down | ENSMUSG00000056708 | -1.20 | 2.41E-12 | Ier5          | protein_coding | 7.66 | 7.60     | 7.67 | 7.48  | 6.60 | 6.50 | 6.51 | 6.09 |
| Down | ENSMUSG0000002897  | -1.58 | 2.51E-12 | Il17ra        | protein_coding | 6.16 | 6.06     | 6.00 | 5.88  | 4.42 | 3.84 | 4.45 | 5.32 |
| Down | ENSMUSG00000028927 | -1.20 | 2.51E-12 | Padi2         | protein_coding | 8.00 | 8.03     | 7.89 | 8.02  | 6.99 | 6.57 | 6.18 | 7.27 |
| Down | ENSMUSG00000035840 | -1.04 | 2.56E-12 | Lysmd3        | protein_coding | 6.67 | 7.02     | 6.63 | 7.02  | 5.84 | 5.93 | 5.75 | 5.93 |
| Down | ENSMUSG00000039934 | -1.20 | 2.63E-12 | Gsap          | protein_coding | 5.86 | 5.76     | 6.00 | 5.95  | 4.80 | 4.60 | 4.88 | 4.97 |
| Down | ENSMUSG00000115338 | -1.93 | 2.70E-12 | Pnp           | protein_coding | 6.06 | 5.74     | 5.94 | 6.13  | 3.45 | 4.76 | 3.97 | 4.59 |
| Up   | ENSMUSG00000062252 | 2.27  | 2.97E-12 | Lhfp15        | protein_coding | 4.11 | 3.52     | 3.93 | 4.09  | 5.66 | 6.44 | 5.67 | 5.46 |
| Down | ENSMUSG00000026344 | -3.12 | 3.06E-12 | Lypd1         | protein_coding | 9.75 | 9.98     | 9.50 | 10.20 | 5.71 | 7.24 | 4.77 | 7.76 |
| Up   | ENSMUSG00000060716 | 1.10  | 3.13E-12 | Plekhh1       | protein_coding | 8.10 | 7.59     | 8.17 | 7.96  | 9.49 | 8.51 | 8.99 | 9.09 |
| Down | ENSMUSG00000007872 | -1.25 | 3.21E-12 | Id3           | protein_coding | 6.24 | 6.04     | 5.90 | 6.25  | 5.38 | 4.51 | 4.94 | 4.97 |
| Up   | ENSMUSG00000026023 | 2.58  | 3.29E-12 | Cdk15         | protein_coding | 4.32 | 4.34     | 4.17 | 4.19  | 6.45 | 6.65 | 6.08 | 6.08 |
| Down | ENSMUSG00000060260 | -1.35 | 3.39E-12 | Pwn2          |                |      |          |      |       |      |      |      |      |



|      |                    |       |          |               |                |      |      |      |      |       |      |      |       |
|------|--------------------|-------|----------|---------------|----------------|------|------|------|------|-------|------|------|-------|
| Down | ENSMUSG00000053647 | -3.53 | 3.60E-12 | Gper1         | protein_coding | 3.81 | 4.31 | 3.80 | 4.25 | 2.37  | 2.78 | 2.13 | 2.00  |
| Down | ENSMUSG00000024985 | -1.49 | 3.98E-12 | Tcf7l2        | protein_coding | 6.87 | 6.75 | 7.09 | 6.62 | 5.92  | 5.31 | 4.75 | 5.52  |
| Up   | ENSMUSG00000032033 | 2.17  | 4.14E-12 | Bax2          | protein_coding | 4.07 | 4.17 | 3.75 | 3.86 | 5.82  | 5.58 | 5.63 | 6.17  |
| Up   | ENSMUSG00000042524 | 1.10  | 4.34E-12 | Sun2          | protein_coding | 6.98 | 7.03 | 6.97 | 6.69 | 8.32  | 7.93 | 7.84 | 7.85  |
| Down | ENSMUSG00000029999 | -1.10 | 4.55E-12 | Tgfa          | protein_coding | 7.77 | 8.16 | 7.91 | 8.02 | 6.70  | 6.52 | 7.14 | 7.13  |
| Down | ENSMUSG00000024534 | -1.49 | 4.71E-12 | Sncalp        | protein_coding | 5.85 | 6.04 | 6.10 | 6.20 | 5.06  | 4.44 | 4.00 | 5.08  |
| Up   | ENSMUSG00000027283 | 1.45  | 5.15E-12 | Eh4           | protein_coding | 5.69 | 5.74 | 5.66 | 5.77 | 6.88  | 6.75 | 7.51 | 6.72  |
| Down | ENSMUSG00000020209 | -2.15 | 5.17E-12 | Myh15         | protein_coding | 5.58 | 5.82 | 5.73 | 5.72 | 4.31  | 3.77 | 3.24 | 4.08  |
| Up   | ENSMUSG00000020234 | 1.13  | 5.19E-12 | 4930404N11Rik | protein_coding | 6.14 | 5.92 | 6.50 | 6.21 | 7.43  | 7.39 | 7.31 | 7.04  |
| Down | ENSMUSG00000045751 | -3.28 | 5.26E-12 | Mms22l        | protein_coding | 5.12 | 5.02 | 5.02 | 5.17 | 2.44  | 2.22 | 2.35 | 3.78  |
| Down | ENSMUSG00000026471 | -2.34 | 5.37E-12 | Mr1           | protein_coding | 5.66 | 5.44 | 5.43 | 5.62 | 3.69  | 3.05 | 4.10 | 3.53  |
| Down | ENSMUSG00000033542 | -2.42 | 5.73E-12 | Arhgef5       | protein_coding | 5.54 | 5.25 | 5.29 | 5.50 | 3.55  | 2.98 | 2.71 | 4.20  |
| Down | ENSMUSG00000038793 | -3.01 | 6.31E-12 | Lefty1        | protein_coding | 5.42 | 5.17 | 5.52 | 5.00 | 3.85  | 2.44 | 2.79 | 2.78  |
| Down | ENSMUSG00000064360 | -6.19 | 7.13E-12 | mt-Nd3        | protein_coding | 4.29 | 4.27 | 4.60 | 5.04 | 2.13  | 2.00 | 2.20 | 2.24  |
| Down | ENSMUSG00000024087 | -3.06 | 7.19E-12 | Cyp1b1        | protein_coding | 4.87 | 5.43 | 4.91 | 5.31 | 3.35  | 2.00 | 3.24 | 2.92  |
| Down | ENSMUSG00000022793 | -1.19 | 7.19E-12 | B4gal4        | protein_coding | 7.34 | 7.44 | 7.40 | 7.53 | 6.14  | 6.36 | 5.79 | 6.67  |
| Down | ENSMUSG00000028521 | -1.06 | 7.48E-12 | Slc35d1       | protein_coding | 6.62 | 6.97 | 6.66 | 6.71 | 5.30  | 5.78 | 6.04 | 5.76  |
| Down | ENSMUSG00000009614 | -1.40 | 7.59E-12 | Sardh         | protein_coding | 6.09 | 5.93 | 5.94 | 6.05 | 4.72  | 4.96 | 4.88 | 4.36  |
| Down | ENSMUSG00000026712 | -2.02 | 7.79E-12 | Mrc2          | protein_coding | 5.21 | 5.15 | 5.20 | 5.38 | 3.77  | 2.85 | 3.87 | 3.81  |
| Down | ENSMUSG00000040948 | -1.48 | 7.85E-12 | Slc22d2       | protein_coding | 7.76 | 7.51 | 7.45 | 7.92 | 6.44  | 5.65 | 6.44 | 6.11  |
| Down | ENSMUSG00000039167 | -2.64 | 7.90E-12 | Adgr4         | protein_coding | 5.23 | 4.95 | 5.26 | 5.24 | 3.60  | 2.85 | 2.13 | 3.70  |
| Down | ENSMUSG00000022018 | -1.13 | 8.01E-12 | Rgcc          | protein_coding | 6.54 | 6.32 | 6.54 | 6.29 | 5.41  | 5.62 | 5.10 | 5.33  |
| Up   | ENSMUSG00000001666 | 1.05  | 8.14E-12 | Ddt           | protein_coding | 6.66 | 6.43 | 6.57 | 6.36 | 7.33  | 7.56 | 7.86 | 7.27  |
| Down | ENSMUSG00000032744 | -2.89 | 8.28E-12 | Heyl          | protein_coding | 5.00 | 4.86 | 4.24 | 4.65 | 2.47  | 2.92 | 2.35 | 3.29  |
| Down | ENSMUSG00000073427 | -1.43 | 8.49E-12 | Gm4924        | protein_coding | 5.58 | 5.87 | 5.90 | 6.16 | 4.36  | 4.74 | 4.35 | 4.93  |
| Down | ENSMUSG00000022528 | -2.05 | 8.81E-12 | Hes1          | protein_coding | 5.80 | 5.88 | 6.22 | 6.36 | 4.56  | 4.22 | 4.52 | 3.66  |
| Down | ENSMUSG00000019880 | -1.84 | 9.45E-12 | Rspo3         | protein_coding | 6.71 | 7.18 | 6.79 | 6.88 | 5.33  | 6.21 | 5.64 | 5.21  |
| Down | ENSMUSG00000032327 | -2.26 | 9.84E-12 | Stra6         | protein_coding | 5.61 | 5.80 | 5.50 | 5.60 | 3.40  | 3.05 | 4.19 | 4.08  |
| Down | ENSMUSG00000106918 | -1.16 | 1.00E-11 | Mrip33        | protein_coding | 6.81 | 6.66 | 7.07 | 6.94 | 5.73  | 6.12 | 5.61 | 5.58  |
| Down | ENSMUSG00000044345 | -1.41 | 1.02E-11 | Marveld1      | protein_coding | 5.96 | 5.43 | 5.87 | 5.82 | 4.22  | 4.76 | 4.30 | 4.77  |
| Up   | ENSMUSG00000046854 | 2.06  | 1.04E-11 | Pip5k1l       | protein_coding | 3.38 | 4.05 | 3.93 | 4.39 | 5.50  | 5.17 | 6.11 | 5.98  |
| Down | ENSMUSG00000074743 | -2.55 | 1.08E-11 | Tbhd          | protein_coding | 5.82 | 5.60 | 5.82 | 5.76 | 3.45  | 2.00 | 4.16 | 4.11  |
| Down | ENSMUSG00000022836 | -2.71 | 1.12E-11 | Onc1          | protein_coding | 4.82 | 4.93 | 4.93 | 5.00 | 2.92  | 2.62 | 3.13 | 3.06  |
| Down | ENSMUSG00000058979 | 1.02  | 1.15E-11 | Hdh5d5        | protein_coding | 6.42 | 6.28 | 6.39 | 6.40 | 5.51  | 5.02 | 5.14 | 5.52  |
| Down | ENSMUSG00000022724 | -1.40 | 1.16E-11 | Riox2         | protein_coding | 6.20 | 6.08 | 6.73 | 6.59 | 5.29  | 4.58 | 5.38 | 5.15  |
| Up   | ENSMUSG00000026879 | 1.15  | 1.20E-11 | Gsn           | protein_coding | 7.51 | 7.27 | 7.60 | 7.41 | 8.73  | 8.39 | 8.64 | 8.58  |
| Down | ENSMUSG00000071341 | -1.32 | 1.20E-11 | Egr4          | protein_coding | 6.24 | 6.56 | 5.98 | 6.06 | 5.47  | 4.72 | 4.71 | 5.03  |
| Down | ENSMUSG00000031380 | -3.00 | 1.21E-11 | Vegfd         | protein_coding | 4.80 | 4.64 | 4.89 | 4.76 | 2.37  | 2.24 | 2.71 | 3.48  |
| Down | ENSMUSG00000027800 | -2.87 | 1.22E-11 | Tm4sf1        | protein_coding | 5.58 | 5.50 | 5.45 | 5.69 | 3.89  | 2.85 | 2.35 | 3.66  |
| Down | ENSMUSG00000021108 | -1.62 | 1.22E-11 | Prkch         | protein_coding | 5.10 | 4.93 | 4.82 | 5.04 | 2.82  | 3.73 | 4.07 | 3.85  |
| Up   | ENSMUSG00000036533 | 1.17  | 1.28E-11 | Cdc42ep3      | protein_coding | 5.26 | 5.36 | 5.11 | 5.77 | 6.36  | 6.69 | 6.66 | 6.23  |
| Down | ENSMUSG00000056501 | -1.45 | 1.33E-11 | Cebpb         | protein_coding | 7.26 | 6.81 | 7.11 | 6.73 | 5.74  | 5.62 | 5.93 | 5.62  |
| Down | ENSMUSG00000026830 | 1.03  | 1.35E-11 | Emm           | protein_coding | 9.15 | 9.06 | 8.76 | 9.14 | 10.43 | 9.52 | 9.81 | 10.30 |
| Up   | ENSMUSG00000040511 | -1.34 | 1.35E-11 | Pvr           | protein_coding | 6.25 | 6.27 | 5.93 | 5.96 | 4.72  | 4.72 | 4.79 | 4.63  |
| Down | ENSMUSG00000053164 | -1.56 | 1.39E-11 | Gpr21         | protein_coding | 4.72 | 5.15 | 4.82 | 4.89 | 3.64  | 3.98 | 3.63 | 3.39  |
| Down | ENSMUSG00000022836 | -1.42 | 1.47E-11 | Myk           | protein_coding | 7.16 | 6.87 | 7.26 | 7.29 | 5.64  | 5.50 | 6.44 | 5.35  |
| Down | ENSMUSG00000024039 | -1.69 | 1.49E-11 | Cse           | protein_coding | 6.57 | 6.26 | 6.31 | 6.42 | 4.68  | 4.32 | 4.90 | 5.49  |
| Up   | ENSMUSG00000071268 | 1.07  | 1.64E-11 | Zfp946        | protein_coding | 6.29 | 6.61 | 6.57 | 6.83 | 7.72  | 7.45 | 7.68 | 7.45  |
| Down | ENSMUSG00000022146 | -1.76 | 1.76E-11 | Osmr          | protein_coding | 5.21 | 5.21 | 5.13 | 5.31 | 3.77  | 3.77 | 4.10 | 4.02  |
| Down | ENSMUSG00000073752 | -2.44 | 1.78E-11 | Gm10570       | protein_coding | 5.15 | 4.84 | 5.31 | 4.87 | 3.17  | 3.17 | 2.63 | 3.74  |
| Down | ENSMUSG00000020805 | -1.62 | 1.79E-11 | Slc13a5       | protein_coding | 4.98 | 4.95 | 5.45 | 5.33 | 3.96  | 3.65 | 4.16 | 3.66  |
| Down | ENSMUSG00000044708 | -1.04 | 1.89E-11 | Kcnj10        | protein_coding | 9.72 | 9.70 | 9.88 | 9.65 | 9.14  | 8.15 | 8.39 | 8.93  |
| Down | ENSMUSG00000047123 | -1.44 | 2.01E-11 | Ticam1        | protein_coding | 5.57 | 5.72 | 6.07 | 5.82 | 4.28  | 4.58 | 4.77 | 4.46  |
| Down | ENSMUSG00000073293 | -1.08 | 2.15E-11 | Nudt10        | protein_coding | 7.35 | 7.43 | 7.29 | 7.16 | 6.59  | 6.33 | 5.81 | 6.25  |
| Down | ENSMUSG00000009378 | -3.15 | 2.24E-11 | Slc16a12      | protein_coding | 4.84 | 4.47 | 5.19 | 5.27 | 2.66  | 2.53 | 2.45 | 3.44  |
| Down | ENSMUSG00000035594 | -1.96 | 2.31E-11 | Chrna5        | protein_coding | 5.21 | 4.97 | 5.15 | 5.22 | 3.55  | 3.38 | 3.75 | 3.66  |
| Down | ENSMUSG00000042228 | -1.57 | 2.31E-11 | Lyn           | protein_coding | 6.13 | 6.05 | 6.04 | 6.06 | 4.86  | 4.76 | 4.75 | 4.17  |
| Down | ENSMUSG00000035910 | -1.39 | 2.58E-11 | Dcdc2a        | protein_coding | 7.03 | 7.01 | 7.07 | 7.05 | 4.93  | 6.15 | 5.63 | 5.87  |
| Down | ENSMUSG00000046285 | -1.29 | 2.71E-11 | Frm6b         | protein_coding | 6.85 | 7.23 | 7.08 | 7.14 | 5.89  | 6.31 | 4.90 | 5.97  |
| Down | ENSMUSG00000044712 | -1.16 | 2.71E-11 | Slc38a6       | protein_coding | 5.51 | 5.72 | 5.78 | 5.50 | 4.97  | 4.97 | 4.44 | 4.55  |
| Down | ENSMUSG00000023966 | -1.41 | 2.85E-11 | Rsp9b         | protein_coding | 6.08 | 6.18 | 6.08 | 6.38 | 4.61  | 4.27 | 5.13 | 5.35  |
| Up   | ENSMUSG00000036634 | 1.46  | 2.88E-11 | Mag           | protein_coding | 8.53 | 8.43 | 8.63 | 8.40 | 10.37 | 9.12 | 9.96 | 10.09 |
| Down | ENSMUSG00000045441 | -1.00 | 2.88E-11 | Gprin3        | protein_coding | 7.53 | 7.79 | 7.21 | 7.32 | 6.27  | 6.72 | 6.15 | 6.77  |
| Down | ENSMUSG00000024957 | -1.81 | 2.96E-11 | Kcnk4         | protein_coding | 6.09 | 5.58 | 6.05 | 5.74 | 4.27  | 3.33 | 4.27 | 4.66  |
| Down | ENSMUSG00000033502 | -1.32 | 3.21E-11 | Cdc14a        | protein_coding | 5.79 | 5.78 | 6.09 | 6.25 | 4.31  | 4.97 | 5.04 | 4.79  |
| Down | ENSMUSG00000062980 | -2.57 | 3.26E-11 | Cped1         | protein_coding | 5.47 | 5.83 | 5.29 | 6.04 | 3.17  | 4.30 | 2.35 | 3.81  |
| Down | ENSMUSG00000042745 | -2.75 | 3.61E-11 | Id1           | protein_coding | 5.51 | 5.10 | 4.75 | 4.87 | 2.37  | 2.78 | 2.86 | 3.85  |
| Down | ENSMUSG00000031613 | -3.05 | 3.68E-11 | Hpgd          | protein_coding | 4.80 | 5.06 | 4.75 | 5.69 | 2.13  | 2.44 | 3.45 | 3.34  |
| Down | ENSMUSG00000051118 | -2.73 | 3.84E-11 | Olf77         | protein_coding | 3.91 | 4.34 | 3.93 | 3.82 | 2.57  | 2.70 | 2.13 | 2.70  |
| Down | ENSMUSG00000036357 | -2.25 | 3.89E-11 | Gpr101        | protein_coding | 6.15 | 6.49 | 5.99 | 6.38 | 4.80  | 3.98 | 2.71 | 4.77  |
| Down | ENSMUSG00000048960 | -1.35 | 4.11E-11 | Prex2         | protein_coding | 9.33 | 9.41 | 9.30 | 9.24 | 7.77  | 8.22 | 7.32 | 8.39  |
| Down | ENSMUSG00000010064 | -2.33 | 4.16E-11 | Slc38a3       | protein_coding | 6.99 | 6.82 | 6.90 | 7.07 | 4.99  | 3.61 | 4.22 | 5.61  |
| Down | ENSMUSG00000010476 | -2.20 | 4.21E-11 | Eyb3          | protein_coding | 4.70 | 5.06 | 4.97 | 5.07 | 3.40  | 3.71 | 3.39 | 3.97  |
| Down | ENSMUSG00000018654 | -2.21 | 4.37E-11 | Ikarf1        | protein_coding | 6.13 | 6.55 | 6.31 | 5.09 | 3.81  | 3.71 | 3.81 | 2.71  |
| Down | ENSMUSG00000001844 | -1.25 | 4.59E-11 | Zdhhc4        | protein_coding | 6.46 | 6.75 | 6.86 | 6.86 | 5.25  | 5.00 | 5.88 | 5.92  |
| Up   | ENSMUSG00000034098 | 1.13  | 4.62E-11 | Fstl5         | protein_coding | 6.95 | 7.14 | 6.62 | 7.24 | 8.04  | 7.91 | 8.35 | 8.13  |
| Down | ENSMUSG00000020521 | -1.03 | 4.83E-11 | Rnf11         | protein_coding | 6.46 | 6.48 | 6.34 | 6.57 | 4.92  | 5.65 | 5.54 | 5.75  |
| Down | ENSMUSG00000044350 | -1.61 | 4.86E-11 | Lacc1         | protein_coding | 5.76 | 5.15 | 5.56 | 5.69 | 4.31  | 4.40 | 4.16 | 3.81  |
| Down | ENSMUSG00000031799 | -1.19 | 4.88E-11 | Tpm4          | protein_coding | 7.69 | 7.82 | 7.76 | 7.73 | 6.90  | 6.12 | 6.36 | 6.86  |
| Down | ENSMUSG00000024998 | -1.56 | 5.02E-11 | Plice1        | protein_coding | 7.26 | 6.96 | 6.73 | 7.33 | 5.51  | 5.89 | 4.59 | 6.06  |
| Down | ENSMUSG00000041075 | -1.30 | 5.02E-11 | Fzd7          | protein_coding | 6.06 | 6.08 | 6.25 | 6.36 | 4.92  | 4.51 | 5.26 | 5.61  |
| Down | ENSMUSG00000049892 | -1.73 | 5.22E-11 | Rasd1         | protein_coding | 7.06 | 7.37 | 7.44 | 6.94 | 4.52  | 6.26 | 5.20 | 5.75  |
| Up   | ENSMUSG00000010461 | 1.21  | 5.26E-11 | Eya4          | protein_coding | 5.47 | 5.62 | 5.68 | 6.59 | 5.72  | 7.11 | 6.68 | 6.68  |
| Up   | ENSMUSG00000004791 | 1.96  | 5.33E-11 | Pgf           | protein_coding | 4.70 | 3.88 | 4.57 | 4.37 | 6.51  | 6.13 | 6.13 | 5.75  |
| Down | ENSMUSG00000030322 | -1.23 | 5.63E-11 | Mbd4          | protein_coding | 6.01 | 6.18 | 5.74 | 5.88 | 5.15  | 4.82 | 4.50 | 4.85  |
| Down | ENSMUSG00000041378 | -3.08 | 5.86E-11 | Oldn5         | protein_coding | 4.89 | 5.08 | 4.37 | 4.65 | 2.66  | 2.34 | 3.54 | 2.00  |
| Down | ENSMUSG00000023259 | -1.33 | 5.89E-11 | Ngef          | protein_coding | 9.05 | 9.14 | 8.92 | 9.07 | 7.17  | 6.10 | 7.17 | 8.18  |
| Down | ENSMUSG00000078227 | -2.91 | 5.90E-11 | Ccr5          | protein_coding | 5.45 |      |      |      |       |      |      |       |

|      |                     |       |          |               |                |      |      |       |      |       |       |       |       |
|------|---------------------|-------|----------|---------------|----------------|------|------|-------|------|-------|-------|-------|-------|
| Down | ENSMUSG00000024317  | -1.10 | 6.26E-11 | Rnf138        | protein_coding | 6.63 | 6.97 | 7.08  | 7.15 | 5.50  | 6.15  | 6.07  | 5.87  |
| Down | ENSMUSG00000091956  | -1.85 | 6.44E-11 | C2cd4b        | protein_coding | 5.74 | 6.13 | 6.23  | 5.79 | 4.80  | 4.22  | 3.40  | 4.66  |
| Down | ENSMUSG00000040723  | -1.56 | 6.55E-11 | Rcsd1         | protein_coding | 5.17 | 5.33 | 3.69  | 5.31 | 5.37  | 4.22  | 4.27  | 3.70  |
| Down | ENSMUSG00000019214  | -1.65 | 6.61E-11 | Chf1f8        | protein_coding | 6.94 | 6.77 | 6.81  | 7.06 | 5.32  | 5.39  | 5.40  | 5.31  |
| Down | ENSMUSG00000049625  | -2.66 | 7.01E-11 | Tifab         | protein_coding | 4.87 | 4.69 | 4.93  | 4.80 | 3.47  | 2.62  | 2.13  | 3.39  |
| Down | ENSMUSG00000026029  | -2.77 | 7.17E-11 | Casp8         | protein_coding | 4.65 | 4.72 | 4.05  | 4.65 | 2.66  | 2.98  | 2.54  | 2.85  |
| Down | ENSMUSG00000027022  | -2.31 | 7.45E-11 | Xrp2          | protein_coding | 5.94 | 5.04 | 5.59  | 5.23 | 2.74  | 3.84  | 3.77  | 3.44  |
| Down | ENSMUSG00000071856  | -1.12 | 7.78E-11 | Msc           | protein_coding | 8.26 | 7.98 | 8.11  | 8.02 | 7.03  | 6.50  | 6.40  | 6.89  |
| Down | ENSMUSG00000050730  | -1.09 | 7.90E-11 | Arhgap42      | protein_coding | 6.83 | 6.79 | 6.59  | 6.67 | 5.56  | 5.60  | 5.51  | 6.06  |
| Down | ENSMUSG000000089804 | -3.55 | 7.91E-11 | Gm10277       | protein_coding | 3.56 | 4.37 | 3.89  | 3.55 | 2.00  | 2.62  | 2.00  | 2.44  |
| Up   | ENSMUSG00000009951  | 1.77  | 8.00E-11 | 6330409D20Rik | protein_coding | 3.95 | 3.73 | 3.93  | 4.05 | 5.09  | 5.56  | 5.56  | 5.31  |
| Up   | ENSMUSG00000074001  | 1.63  | 8.00E-11 | Klh40         | protein_coding | 4.82 | 4.72 | 4.52  | 5.05 | 6.15  | 6.35  | 6.40  | 6.20  |
| Down | ENSMUSG00000053070  | -1.54 | 8.06E-11 | Cfap300       | protein_coding | 6.14 | 6.13 | 5.99  | 6.25 | 5.20  | 4.96  | 4.04  | 4.50  |
| Up   | ENSMUSG00000020374  | 1.11  | 8.38E-11 | Rasgef1c      | protein_coding | 4.77 | 4.97 | 4.70  | 5.11 | 5.71  | 6.09  | 5.96  | 5.81  |
| Down | ENSMUSG00000029528  | -1.26 | 8.41E-11 | Pxn           | protein_coding | 6.85 | 6.46 | 6.87  | 6.83 | 5.20  | 5.42  | 5.45  | 6.09  |
| Down | ENSMUSG00000109564  | -2.35 | 8.59E-11 | Muc16         | protein_coding | 6.15 | 6.42 | 6.50  | 6.67 | 3.73  | 4.30  | 3.94  | 5.05  |
| Down | ENSMUSG00000040147  | -2.57 | 8.86E-11 | Maob          | protein_coding | 6.48 | 6.20 | 6.51  | 6.64 | 3.29  | 4.85  | 3.24  | 4.61  |
| Down | ENSMUSG00000019842  | -1.05 | 8.95E-11 | Traf3ip2      | protein_coding | 5.98 | 6.39 | 6.39  | 6.44 | 5.97  | 5.04  | 5.49  | 5.23  |
| Down | ENSMUSG000000058706 | -1.04 | 8.96E-11 | 0610030E20Rik | protein_coding | 6.98 | 7.27 | 7.34  | 6.90 | 6.05  | 6.22  | 6.26  | 5.98  |
| Up   | ENSMUSG000000481938 | 1.86  | 9.36E-11 | Dm12          | protein_coding | 4.89 | 4.58 | 4.27  | 4.31 | 6.47  | 6.26  | 5.81  | 6.20  |
| Down | ENSMUSG000000094747 | -2.97 | 9.78E-11 | Olf1r1307     | protein_coding | 5.31 | 4.93 | 5.15  | 5.27 | 2.66  | 2.92  | 3.35  | 3.12  |
| Down | ENSMUSG00000040490  | -1.10 | 1.03E-10 | Lfn2          | protein_coding | 7.18 | 7.08 | 7.05  | 7.30 | 5.93  | 6.12  | 6.43  | 5.85  |
| Down | ENSMUSG00000031610  | -1.95 | 1.04E-10 | Scrg1         | protein_coding | 6.69 | 6.71 | 6.09  | 6.40 | 5.47  | 4.98  | 4.77  | 4.14  |
| Down | ENSMUSG00000022687  | -1.09 | 1.05E-10 | Boc           | protein_coding | 6.66 | 6.48 | 6.17  | 6.23 | 5.46  | 5.49  | 5.11  | 5.44  |
| Down | ENSMUSG00000035783  | -2.93 | 1.08E-10 | Acta2         | protein_coding | 4.57 | 4.82 | 4.27  | 5.11 | 2.97  | 2.34  | 2.54  | 3.17  |
| Down | ENSMUSG00000061132  | -2.80 | 1.10E-10 | Blnk          | protein_coding | 4.75 | 5.36 | 4.97  | 5.76 | 3.40  | 2.62  | 2.00  | 3.92  |
| Down | ENSMUSG00000024620  | -1.34 | 1.18E-10 | Pdgfrb        | protein_coding | 6.48 | 5.98 | 6.31  | 6.35 | 5.37  | 5.18  | 4.99  | 4.57  |
| Down | ENSMUSG00000054889  | -1.22 | 1.21E-10 | Dsp           | protein_coding | 7.91 | 7.86 | 8.08  | 7.80 | 6.59  | 6.06  | 7.18  | 6.85  |
| Up   | ENSMUSG00000022407  | 1.21  | 1.24E-10 | Adsl          | protein_coding | 6.51 | 6.37 | 6.57  | 6.40 | 7.74  | 7.65  | 7.90  | 7.16  |
| Down | ENSMUSG00000002603  | -2.57 | 1.26E-10 | Tgfb1         | protein_coding | 5.31 | 5.63 | 5.35  | 5.42 | 2.37  | 3.38  | 2.71  | 4.33  |
| Down | ENSMUSG00000038415  | -3.30 | 1.29E-10 | Foxq1         | protein_coding | 4.70 | 4.41 | 4.43  | 5.04 | 2.00  | 3.05  | 2.00  | 3.06  |
| Down | ENSMUSG000000055190 | -1.63 | 1.30E-10 | Zfp78         | protein_coding | 5.65 | 5.53 | 5.80  | 5.12 | 3.45  | 4.49  | 4.22  | 4.25  |
| Down | ENSMUSG00000044468  | -2.45 | 1.35E-10 | Ten15c        | protein_coding | 5.28 | 4.91 | 5.38  | 5.30 | 3.23  | 3.17  | 2.71  | 3.95  |
| Down | ENSMUSG00000031216  | -1.01 | 1.35E-10 | Slart8b       | protein_coding | 5.60 | 5.40 | 4.04  | 4.61 | 4.61  | 4.57  | 3.05  | 4.57  |
| Up   | ENSMUSG00000020834  | 1.82  | 1.36E-10 | Dhrs13        | protein_coding | 4.65 | 4.82 | 4.37  | 4.50 | 6.00  | 6.03  | 6.68  | 6.09  |
| Down | ENSMUSG00000000211  | -2.96 | 1.41E-10 | Sp1           | protein_coding | 5.06 | 4.84 | 4.34  | 4.28 | 3.04  | 3.11  | 2.00  | 2.62  |
| Down | ENSMUSG00000108596  | -1.88 | 1.42E-10 | Gm49368       | protein_coding | 6.42 | 6.33 | 6.10  | 5.84 | 3.64  | 5.11  | 4.35  | 4.55  |
| Down | ENSMUSG00000059325  | -2.50 | 1.46E-10 | Hopx          | protein_coding | 8.25 | 8.08 | 7.89  | 8.28 | 5.36  | 5.59  | 6.12  | 5.72  |
| Down | ENSMUSG00000006611  | -2.06 | 1.50E-10 | Hfe           | protein_coding | 5.34 | 5.12 | 4.97  | 5.50 | 2.97  | 3.73  | 3.90  | 3.66  |
| Up   | ENSMUSG00000006782  | 1.20  | 1.58E-10 | Cnp           | protein_coding | 9.97 | 9.79 | 10.14 | 9.98 | 11.46 | 10.44 | 11.18 | 11.39 |
| Up   | ENSMUSG00000030612  | 1.01  | 1.64E-10 | Mrlp46        | protein_coding | 7.29 | 6.96 | 7.12  | 7.26 | 8.02  | 8.16  | 8.42  | 7.96  |
| Down | ENSMUSG00000021286  | -1.33 | 1.66E-10 | Zlyve21       | protein_coding | 6.32 | 6.14 | 6.12  | 5.71 | 4.82  | 4.68  | 5.26  | 4.68  |
| Down | ENSMUSG00000048915  | 1.26  | 1.78E-10 | Efna5         | protein_coding | 6.03 | 6.47 | 5.88  | 6.42 | 7.12  | 7.59  | 7.37  | 7.60  |
| Down | ENSMUSG00000040957  | -1.14 | 1.78E-10 | Cables1       | protein_coding | 7.39 | 7.69 | 7.15  | 7.23 | 6.43  | 6.43  | 6.31  | 6.60  |
| Down | ENSMUSG00000028747  | -1.76 | 1.79E-10 | Htr6          | protein_coding | 5.21 | 5.61 | 5.61  | 5.33 | 3.81  | 3.38  | 4.07  | 4.02  |
| Up   | ENSMUSG00000016757  | 1.19  | 1.80E-10 | Tll12         | protein_coding | 6.09 | 6.25 | 6.23  | 5.94 | 7.17  | 7.35  | 7.42  | 7.13  |
| Down | ENSMUSG00000028546  | -1.80 | 1.84E-10 | Cfap45        | protein_coding | 6.36 | 5.67 | 5.43  | 3.77 | 4.26  | 4.24  | 4.33  | 4.74  |
| Down | ENSMUSG00000028555  | -1.41 | 1.90E-10 | Ttc39a        | protein_coding | 5.08 | 4.84 | 4.84  | 4.45 | 5.62  | 6.23  | 6.00  | 5.86  |
| Down | ENSMUSG00000028583  | -2.71 | 1.97E-10 | Pdnp          | protein_coding | 6.09 | 5.58 | 5.75  | 6.02 | 4.03  | 4.10  | 2.00  | 3.57  |
| Down | ENSMUSG00000049001  | -1.08 | 2.05E-10 | Ndnf          | protein_coding | 7.24 | 7.37 | 7.50  | 7.36 | 6.04  | 6.29  | 6.71  | 6.17  |
| Down | ENSMUSG00000022488  | -1.71 | 2.15E-10 | Nckap1l       | protein_coding | 5.97 | 5.77 | 5.46  | 6.16 | 4.72  | 4.58  | 3.54  | 4.36  |
| Down | ENSMUSG00000030792  | -4.60 | 2.21E-10 | Dkk1          | protein_coding | 3.31 | 4.05 | 3.93  | 4.22 | 2.37  | 2.12  | 2.00  | 2.12  |
| Down | ENSMUSG00000006386  | -2.13 | 2.21E-10 | Tek           | protein_coding | 4.67 | 5.26 | 5.45  | 4.96 | 2.47  | 3.69  | 3.35  | 3.92  |
| Down | ENSMUSG00000051920  | -1.19 | 2.27E-10 | Rspo2         | protein_coding | 7.05 | 7.03 | 6.74  | 6.78 | 6.26  | 6.08  | 5.38  | 5.48  |
| Down | ENSMUSG000000069763 | -1.91 | 2.31E-10 | Tmem100       | protein_coding | 5.60 | 5.84 | 5.68  | 5.69 | 3.85  | 3.43  | 4.41  | 4.38  |
| Up   | ENSMUSG00000030093  | 1.34  | 2.33E-10 | Wnt7a         | protein_coding | 6.51 | 5.75 | 5.67  | 6.30 | 7.25  | 7.27  | 7.74  | 7.23  |
| Down | ENSMUSG00000044014  | -2.39 | 2.33E-10 | Npy5r         | protein_coding | 4.98 | 5.70 | 5.73  | 3.89 | 5.24  | 2.62  | 4.04  | 3.17  |
| Down | ENSMUSG00000062542  | -1.30 | 2.35E-10 | Syt9          | protein_coding | 6.29 | 5.98 | 5.79  | 6.19 | 5.01  | 5.04  | 4.88  | 4.63  |
| Up   | ENSMUSG00000004446  | 1.04  | 2.36E-10 | Bld           | protein_coding | 6.22 | 6.12 | 6.65  | 5.97 | 7.31  | 7.09  | 7.42  | 7.22  |
| Down | ENSMUSG00000098907  | -2.45 | 2.50E-10 | 4930453H04Rik | protein_coding | 5.74 | 5.06 | 5.52  | 5.48 | 2.82  | 2.53  | 3.63  | 4.33  |
| Up   | ENSMUSG00000042266  | 1.03  | 2.54E-10 | Ptchd4        | protein_coding | 6.51 | 6.63 | 6.36  | 6.50 | 7.40  | 7.55  | 7.74  | 7.24  |
| Down | ENSMUSG00000056856  | 1.60  | 2.61E-10 | Apo8          | protein_coding | 4.98 | 4.69 | 4.63  | 5.11 | 6.33  | 6.56  | 6.11  | 6.26  |
| Down | ENSMUSG00000091122  | -1.92 | 2.61E-10 | Gm8247        | protein_coding | 6.79 | 7.07 | 6.82  | 7.02 | 4.52  | 5.70  | 4.57  | 5.41  |
| Down | ENSMUSG00000037868  | -2.18 | 2.67E-10 | Egr2          | protein_coding | 4.67 | 4.50 | 4.68  | 4.74 | 2.90  | 2.92  | 2.54  | 3.78  |
| Down | ENSMUSG00000028801  | -1.36 | 2.71E-10 | Stgp1         | protein_coding | 5.62 | 5.88 | 5.77  | 5.75 | 4.68  | 4.19  | 4.69  | 4.61  |
| Down | ENSMUSG00000009687  | -2.52 | 2.75E-10 | Fxyd5         | protein_coding | 4.57 | 5.14 | 4.68  | 4.80 | 2.90  | 3.56  | 2.00  | 3.23  |
| Down | ENSMUSG00000031684  | -1.26 | 2.76E-10 | Slc10a7       | protein_coding | 5.85 | 5.98 | 5.77  | 5.94 | 4.56  | 4.62  | 4.97  | 4.81  |
| Up   | ENSMUSG00000015217  | 1.14  | 2.84E-10 | Hmgb3         | protein_coding | 6.16 | 6.25 | 6.82  | 6.60 | 7.51  | 7.42  | 7.78  | 7.61  |
| Down | ENSMUSG00000042436  | -3.71 | 2.84E-10 | Mfap4         | protein_coding | 4.26 | 4.58 | 4.70  | 4.78 | 2.00  | 2.62  | 2.63  | 2.54  |
| Down | ENSMUSG00000051043  | -3.22 | 2.90E-10 | Gprc5c        | protein_coding | 4.59 | 4.74 | 5.02  | 4.82 | 2.74  | 2.12  | 2.00  | 3.48  |
| Up   | ENSMUSG00000024376  | 1.54  | 2.93E-10 | Epb414a       | protein_coding | 5.68 | 6.00 | 5.94  | 5.94 | 7.59  | 7.04  | 7.54  | 7.26  |
| Down | ENSMUSG00000028643  | -1.53 | 3.01E-10 | Svbp          | protein_coding | 5.36 | 5.26 | 5.74  | 5.98 | 4.28  | 4.27  | 3.63  | 4.46  |
| Down | ENSMUSG00000040717  | -2.36 | 3.11E-10 | Il17rd        | protein_coding | 5.39 | 5.76 | 6.08  | 6.18 | 4.00  | 3.22  | 4.00  | 4.74  |
| Down | ENSMUSG00000031666  | -1.01 | 3.30E-10 | Sat11         | protein_coding | 7.52 | 7.18 | 7.56  | 7.33 | 6.08  | 6.31  | 6.33  | 6.76  |
| Down | ENSMUSG00000019820  | -1.12 | 3.34E-10 | Lims1         | protein_coding | 6.31 | 7.38 | 7.23  | 7.39 | 6.31  | 5.43  | 6.59  | 6.39  |
| Up   | ENSMUSG00000030607  | 2.08  | 3.47E-10 | Acan          | protein_coding | 5.17 | 4.84 | 5.27  | 5.19 | 7.35  | 7.26  | 6.96  | 6.61  |
| Up   | ENSMUSG00000048004  | 1.22  | 3.96E-10 | Tmem196       | protein_coding | 5.74 | 6.31 | 6.48  | 6.48 | 7.26  | 7.49  | 7.65  | 7.41  |
| Down | ENSMUSG00000044469  | -1.82 | 3.96E-10 | Trfaip8l1     | protein_coding | 5.17 | 5.26 | 4.57  | 5.14 | 3.23  | 3.61  | 3.67  | 3.89  |
| Up   | ENSMUSG00000024891  | 1.61  | 4.00E-10 | Slc29a2       | protein_coding | 5.06 | 4.56 | 5.38  | 5.59 | 6.34  | 6.88  | 6.94  | 6.56  |
| Down | ENSMUSG00000024076  | -1.76 | 4.13E-10 | Vit           | protein_coding | 5.15 | 5.33 | 5.50  | 5.48 | 3.45  | 3.84  | 3.83  | 4.36  |
| Up   | ENSMUSG000000403311 | 1.02  | 4.16E-10 | D17H6S53E     | protein_coding | 6.18 | 6.39 | 6.26  | 6.05 | 7.47  | 7.11  | 7.23  | 6.98  |
| Down | ENSMUSG00000004018  | -1.33 | 4.16E-10 | Fanci         | protein_coding | 5.70 | 5.88 | 5.75  | 6.10 | 4.63  | 4.16  | 4.83  | 4.97  |
| Down | ENSMUSG00000064090  | -1.73 | 4.21E-10 | Vrk2          | protein_coding | 5.15 | 5.80 | 5.69  | 4.03 | 5.82  | 4.22  | 4.63  | 4.67  |
| Up   | ENSMUSG00000020085  | 1.35  | 4.23E-10 | Aifm2         | protein_coding | 5.34 | 5.68 | 5.50  | 5.94 | 7.13  | 7.17  | 6.52  | 6.74  |
| Down | ENSMUSG00000050315  | -2.03 | 4.44E-10 | Synpo2        | protein_coding | 6.26 | 6.52 | 6.42  | 6.15 | 4.25  | 5.13  | 4.70  | 5.15  |
| Down | ENSMUSG00000026697  | -1.48 | 4.57E-10 | Mycp          | protein_coding | 5.57 | 5.70 | 5.68  | 5.82 | 4.47  | 3.61  | 4.71  | 4.59  |
| Down | ENSMUSG00000026896  | -2.09 | 4.70E-10 | Htr1          | protein_coding | 4.75 | 5.64 | 4.90  | 5.35 | 5.84  | 3.50  | 3.24  | 4.14  |
| Down | ENSMUSG00000059023  | -2.51 |          |               |                |      |      |       |      |       |       |       |       |

|      |                     |       |          |               |                |       |       |       |       |       |       |       |       |
|------|---------------------|-------|----------|---------------|----------------|-------|-------|-------|-------|-------|-------|-------|-------|
| Up   | ENSMUSG00000048281  | 1.75  | 4.82E-10 | Dleu7         | protein_coding | 4.42  | 5.19  | 5.00  | 5.17  | 6.38  | 6.62  | 6.52  | 6.79  |
| Down | ENSMUSG00000033685  | -2.59 | 4.83E-10 | Ucp2          | protein_coding | 7.71  | 7.11  | 6.51  | 7.81  | 5.68  | 4.49  | 3.50  | 5.25  |
| Down | ENSMUSG00000074166  | -1.50 | 4.84E-10 | AW146154      | protein_coding | 5.81  | 5.70  | 6.25  | 5.83  | 4.47  | 4.78  | 4.54  | 4.48  |
| Down | ENSMUSG00000028088  | -1.81 | 5.12E-10 | Fmo5          | protein_coding | 5.08  | 5.15  | 5.09  | 5.14  | 3.50  | 3.47  | 3.87  | 3.81  |
| Down | ENSMUSG000000052407 | -1.38 | 5.39E-10 | Ccdc171       | protein_coding | 6.87  | 7.03  | 6.89  | 6.98  | 5.61  | 4.49  | 6.11  | 5.87  |
| Down | ENSMUSG00000019762  | -3.36 | 5.44E-10 | lyd           | protein_coding | 5.12  | 5.60  | 5.50  | 5.17  | 2.25  | 3.77  | 2.86  | 2.24  |
| Up   | ENSMUSG00000002190  | 1.14  | 5.55E-10 | Cigln         | protein_coding | 6.57  | 6.58  | 6.67  | 6.58  | 7.90  | 6.34  | 7.77  | 7.71  |
| Down | ENSMUSG00000050122  | -2.11 | 5.83E-10 | Vwa3b         | protein_coding | 6.20  | 6.61  | 6.57  | 6.51  | 3.69  | 4.27  | 5.11  | 4.83  |
| Down | ENSMUSG00000026288  | -1.59 | 5.90E-10 | Inpp5d        | protein_coding | 6.57  | 5.93  | 6.39  | 5.98  | 4.19  | 4.13  | 5.20  | 5.27  |
| Down | ENSMUSG00000034485  | -1.75 | 5.91E-10 | Uaca          | protein_coding | 5.80  | 6.09  | 6.02  | 6.12  | 4.82  | 3.65  | 3.87  | 5.03  |
| Down | ENSMUSG00000051747  | -1.22 | 6.04E-10 | Ttn           | protein_coding | 8.29  | 8.48  | 8.45  | 8.45  | 6.69  | 7.73  | 6.76  | 7.43  |
| Down | ENSMUSG00000027907  | -4.80 | 6.20E-10 | S100a11       | protein_coding | 4.07  | 4.27  | 3.93  | 3.94  | 2.00  | 2.00  | 2.00  | 2.54  |
| Down | ENSMUSG00000022150  | -1.90 | 6.22E-10 | Dab2          | protein_coding | 5.85  | 6.07  | 5.83  | 6.72  | 4.06  | 4.60  | 4.24  | 4.85  |
| Down | ENSMUSG00000026786  | -1.50 | 6.26E-10 | Appb1p        | protein_coding | 6.14  | 5.74  | 5.85  | 5.60  | 4.00  | 4.30  | 4.69  | 4.90  |
| Down | ENSMUSG00000032278  | -2.18 | 6.43E-10 | Paqr5         | protein_coding | 4.59  | 4.44  | 4.60  | 4.67  | 2.74  | 3.05  | 3.07  | 3.34  |
| Down | ENSMUSG00000053012  | -1.12 | 6.46E-10 | Krcc1         | protein_coding | 7.01  | 7.03  | 7.07  | 7.17  | 5.90  | 5.61  | 6.22  | 6.55  |
| Down | ENSMUSG00000044816  | -1.94 | 6.54E-10 | D630023F18Rik | protein_coding | 5.19  | 5.95  | 5.60  | 6.05  | 3.92  | 3.65  | 4.54  | 4.02  |
| Up   | ENSMUSG000000062937 | 1.10  | 6.60E-10 | Mtap          | protein_coding | 5.95  | 6.02  | 5.88  | 5.82  | 6.96  | 6.83  | 7.25  | 6.76  |
| Up   | ENSMUSG000000032679 | 1.48  | 6.65E-10 | Cd59a2        | protein_coding | 6.47  | 5.92  | 5.72  | 6.77  | 7.66  | 7.61  | 7.96  | 7.60  |
| Down | ENSMUSG000000073530 | -2.00 | 6.65E-10 | Pappa2        | protein_coding | 5.76  | 5.28  | 5.73  | 5.33  | 3.77  | 4.13  | 3.40  | 4.46  |
| Down | ENSMUSG000000201778 | -2.97 | 7.43E-10 | Adora2a       | protein_coding | 3.61  | 4.05  | 3.54  | 3.69  | 2.13  | 2.00  | 2.54  | 2.54  |
| Up   | ENSMUSG000000327118 | 1.28  | 7.56E-10 | Mancs1        | protein_coding | 5.36  | 5.64  | 5.79  | 5.59  | 6.43  | 6.87  | 7.30  | 6.48  |
| Down | ENSMUSG00000074259  | -1.36 | 7.78E-10 | Gramd2        | protein_coding | 5.54  | 5.70  | 5.68  | 6.23  | 4.78  | 4.80  | 4.00  | 4.72  |
| Up   | ENSMUSG00000059203  | 1.47  | 7.79E-10 | Il1rapl2      | protein_coding | 4.82  | 5.56  | 5.42  | 5.73  | 7.34  | 6.53  | 6.48  | 6.71  |
| Down | ENSMUSG00000029442  | -1.47 | 7.95E-10 | Wdr66         | protein_coding | 5.69  | 5.82  | 5.53  | 5.91  | 4.13  | 4.64  | 3.94  | 4.88  |
| Down | ENSMUSG00000068167  | -3.86 | 7.99E-10 | Csnka2ip      | protein_coding | 3.77  | 4.50  | 4.52  | 3.94  | 2.13  | 2.00  | 2.00  | 2.92  |
| Down | ENSMUSG00000037973  | -2.89 | 8.21E-10 | lprid1        | protein_coding | 4.45  | 4.56  | 4.97  | 5.28  | 2.57  | 2.85  | 3.07  | 2.99  |
| Down | ENSMUSG00000046338  | -2.62 | 8.24E-10 | Gpal2         | protein_coding | 3.56  | 4.34  | 3.93  | 3.98  | 2.47  | 2.78  | 2.00  | 2.85  |
| Down | ENSMUSG00000032300  | -1.17 | 8.38E-10 | 1700017B05Rik | protein_coding | 7.11  | 6.88  | 7.09  | 7.04  | 5.86  | 6.18  | 5.63  | 5.94  |
| Down | ENSMUSG00000052957  | -2.33 | 8.54E-10 | Gas1          | protein_coding | 5.62  | 5.21  | 5.17  | 5.55  | 3.81  | 2.92  | 2.54  | 4.25  |
| Down | ENSMUSG00000029798  | -1.50 | 9.38E-10 | Herc6         | protein_coding | 5.60  | 5.21  | 5.49  | 5.76  | 3.89  | 4.74  | 3.50  | 4.50  |
| Down | ENSMUSG00000097328  | -1.65 | 9.59E-10 | Tnfrsf12      | protein_coding | 6.10  | 5.84  | 5.65  | 6.16  | 3.73  | 4.66  | 4.57  | 4.79  |
| Down | ENSMUSG000000028654 | -1.63 | 9.73E-10 | Mycl          | protein_coding | 7.70  | 7.64  | 7.91  | 7.33  | 5.98  | 5.80  | 6.26  | 6.70  |
| Down | ENSMUSG00000048367  | -5.05 | 9.95E-10 | Osr1          | protein_coding | 3.81  | 4.58  | 4.91  | 4.37  | 2.13  | 2.00  | 2.00  | 2.00  |
| Down | ENSMUSG00000047557  | -2.45 | 9.99E-10 | Lxn           | protein_coding | 7.03  | 7.23  | 7.24  | 7.36  | 4.74  | 5.49  | 3.07  | 5.40  |
| Down | ENSMUSG00000015568  | -1.21 | 1.00E-09 | Lpl           | protein_coding | 7.44  | 7.53  | 7.89  | 7.72  | 6.85  | 5.95  | 6.78  | 6.11  |
| Down | ENSMUSG00000040138  | -2.67 | 1.02E-09 | Ndp           | protein_coding | 4.32  | 5.33  | 5.27  | 5.69  | 2.66  | 3.33  | 2.79  | 3.78  |
| Down | ENSMUSG00000037808  | -1.02 | 1.02E-09 | Fam76b        | protein_coding | 6.71  | 6.96  | 6.99  | 7.11  | 5.94  | 6.06  | 5.45  | 6.33  |
| Down | ENSMUSG00000029552  | -2.75 | 1.03E-09 | Tes           | protein_coding | 4.29  | 4.44  | 4.57  | 4.63  | 2.57  | 2.70  | 2.00  | 3.39  |
| Down | ENSMUSG00000021702  | -2.22 | 1.03E-09 | Thbs4         | protein_coding | 5.96  | 6.49  | 5.67  | 5.71  | 4.22  | 3.05  | 4.07  | 4.57  |
| Down | ENSMUSG00000026094  | -1.94 | 1.05E-09 | Sik17b        | protein_coding | 5.28  | 5.04  | 5.05  | 5.11  | 3.23  | 3.98  | 2.71  | 4.02  |
| Up   | ENSMUSG00000020843  | 1.02  | 1.06E-09 | Timm22        | protein_coding | 6.97  | 6.63  | 6.63  | 6.88  | 7.59  | 7.92  | 7.93  | 7.67  |
| Down | ENSMUSG00000026322  | -1.15 | 1.12E-09 | Htr4          | protein_coding | 6.79  | 6.78  | 6.98  | 6.68  | 5.75  | 5.48  | 6.19  | 5.33  |
| Down | ENSMUSG00000017969  | -1.72 | 1.13E-09 | Ptgis         | protein_coding | 5.12  | 5.00  | 5.11  | 4.70  | 3.45  | 3.05  | 4.17  | 3.63  |
| Down | ENSMUSG00000025808  | -2.65 | 1.14E-09 | Ccdc7a        | protein_coding | 4.77  | 5.35  | 5.22  | 5.27  | 2.82  | 3.52  | 2.86  | 3.39  |
| Down | ENSMUSG00000004044  | -1.94 | 1.15E-09 | Cavin1        | protein_coding | 5.92  | 5.88  | 5.11  | 5.89  | 4.63  | 3.80  | 3.50  | 4.14  |
| Down | ENSMUSG000000070867 | -1.65 | 1.17E-09 | Tripart2      | protein_coding | 5.99  | 6.86  | 6.12  | 5.49  | 4.36  | 4.10  | 5.08  | 4.43  |
| Up   | ENSMUSG00000021990  | -1.03 | 1.18E-09 | Spata13       | protein_coding | 7.14  | 6.95  | 6.77  | 6.81  | 5.59  | 5.61  | 6.05  | 6.37  |
| Up   | ENSMUSG00000035172  | 1.18  | 1.21E-09 | Plekhh3       | protein_coding | 5.42  | 5.62  | 5.55  | 4.98  | 6.66  | 6.28  | 6.62  | 6.43  |
| Up   | ENSMUSG00000022203  | 1.18  | 1.22E-09 | Efs           | protein_coding | 5.71  | 5.02  | 5.50  | 5.67  | 6.95  | 6.17  | 6.35  | 6.85  |
| Down | ENSMUSG00000021534  | -1.66 | 1.24E-09 | 1700001L19Rik | protein_coding | 6.26  | 6.02  | 6.09  | 6.04  | 3.60  | 5.05  | 4.33  | 5.03  |
| Down | ENSMUSG00000116953  | -2.45 | 1.25E-09 | 9030025P20Rik | protein_coding | 3.99  | 4.31  | 4.43  | 3.90  | 2.57  | 2.62  | 2.45  | 3.12  |
| Down | ENSMUSG00000050945  | -1.10 | 1.27E-09 | Zfp438        | protein_coding | 6.25  | 6.21  | 6.10  | 6.09  | 5.04  | 4.83  | 5.19  | 5.49  |
| Down | ENSMUSG00000095547  | -3.42 | 1.28E-09 | Gm10719       | protein_coding | 9.31  | 9.49  | 9.39  | 9.88  | 5.72  | 6.16  | 5.30  | 7.00  |
| Down | ENSMUSG00000048070  | -2.98 | 1.29E-09 | Pirt          | protein_coding | 5.12  | 5.26  | 5.56  | 4.72  | 3.17  | 2.44  | 3.00  | 3.34  |
| Down | ENSMUSG00000020892  | -1.13 | 1.30E-09 | Aloxe3        | protein_coding | 5.76  | 5.75  | 6.02  | 5.69  | 4.88  | 4.82  | 4.69  | 4.77  |
| Up   | ENSMUSG00000002324  | 1.81  | 1.33E-09 | Rec8          | protein_coding | 3.86  | 4.24  | 4.20  | 4.31  | 5.72  | 5.71  | 5.61  | 5.85  |
| Down | ENSMUSG00000098112  | -2.09 | 1.34E-09 | Bin2          | protein_coding | 6.03  | 5.87  | 5.55  | 5.46  | 4.52  | 3.65  | 3.00  | 4.28  |
| Down | ENSMUSG00000053093  | -2.13 | 1.41E-09 | Myh7          | protein_coding | 7.72  | 7.79  | 7.33  | 8.34  | 4.95  | 5.93  | 5.05  | 6.58  |
| Down | ENSMUSG00000044244  | -2.15 | 1.48E-09 | Il20rb        | protein_coding | 4.95  | 4.86  | 5.13  | 4.87  | 3.04  | 3.47  | 3.30  | 3.48  |
| Down | ENSMUSG00000039891  | -2.38 | 1.53E-09 | Txinb         | protein_coding | 5.17  | 5.33  | 5.09  | 5.75  | 3.60  | 3.05  | 3.13  | 3.95  |
| Down | ENSMUSG00000052085  | -1.09 | 1.53E-09 | Dock8         | protein_coding | 5.85  | 6.31  | 6.08  | 6.02  | 5.04  | 5.27  | 5.11  | 4.85  |
| Up   | ENSMUSG00000055612  | 1.73  | 1.54E-09 | Cdca7         | protein_coding | 4.93  | 4.13  | 4.27  | 4.60  | 5.83  | 6.40  | 5.95  | 6.01  |
| Down | ENSMUSG00000039358  | -2.74 | 1.54E-09 | Drd5          | protein_coding | 5.96  | 6.03  | 5.88  | 5.63  | 2.13  | 4.37  | 3.35  | 3.74  |
| Down | ENSMUSG00000028028  | -1.65 | 1.54E-09 | Alpk1         | protein_coding | 5.65  | 5.76  | 5.55  | 5.96  | 4.06  | 3.56  | 4.57  | 4.74  |
| Down | ENSMUSG00000068134  | -1.20 | 1.54E-09 | Zfp120        | protein_coding | 7.21  | 7.10  | 7.15  | 7.46  | 5.50  | 6.00  | 6.15  | 6.50  |
| Down | ENSMUSG00000020847  | -2.27 | 1.55E-09 | Rph3al        | protein_coding | 5.12  | 5.31  | 5.29  | 5.55  | 3.17  | 3.61  | 4.13  | 2.85  |
| Down | ENSMUSG00000057719  | -2.58 | 1.56E-09 | Sh3rf2        | protein_coding | 4.22  | 3.92  | 4.05  | 4.82  | 2.13  | 3.28  | 2.00  | 3.06  |
| Down | ENSMUSG00000016526  | -1.51 | 1.57E-09 | Dyrk3         | protein_coding | 6.18  | 6.38  | 6.57  | 6.16  | 5.25  | 5.13  | 3.94  | 5.14  |
| Up   | ENSMUSG00000034714  | 1.06  | 1.62E-09 | Tlyh2         | protein_coding | 7.67  | 7.66  | 7.84  | 7.42  | 9.06  | 7.93  | 8.67  | 8.88  |
| Down | ENSMUSG00000031465  | -2.31 | 1.64E-09 | Angpt2        | protein_coding | 3.81  | 4.20  | 4.20  | 3.65  | 2.25  | 2.24  | 2.79  | 3.17  |
| Down | ENSMUSG00000026463  | -1.58 | 1.76E-09 | Atp2b4        | protein_coding | 9.84  | 10.08 | 9.42  | 10.25 | 7.69  | 8.74  | 7.57  | 8.93  |
| Down | ENSMUSG00000027297  | -2.22 | 1.79E-09 | Ltk           | protein_coding | 5.24  | 5.60  | 5.55  | 5.41  | 2.74  | 4.24  | 4.11  | 4.24  |
| Down | ENSMUSG000000424650 | -1.77 | 1.82E-09 | Slc22a6       | protein_coding | 4.54  | 4.44  | 4.44  | 5.09  | 4.24  | 2.37  | 2.13  | 2.70  |
| Down | ENSMUSG00000004661  | -1.17 | 1.83E-09 | Arid3b        | protein_coding | 5.60  | 5.47  | 6.23  | 5.53  | 4.36  | 4.56  | 5.04  | 4.77  |
| Down | ENSMUSG000000663796 | -1.96 | 1.86E-09 | Slc22a8       | protein_coding | 5.13  | 5.68  | 5.48  | 5.50  | 4.10  | 4.07  | 2.35  | 4.20  |
| Down | ENSMUSG00000026126  | -3.00 | 1.87E-09 | Ptpn18        | protein_coding | 5.15  | 4.74  | 4.49  | 4.98  | 3.45  | 2.62  | 2.00  | 2.92  |
| Down | ENSMUSG00000044243  | -3.75 | 1.92E-09 | Bhlha9        | protein_coding | 4.03  | 4.01  | 3.97  | 4.09  | 2.37  | 2.44  | 2.00  | 2.34  |
| Up   | ENSMUSG00000045664  | 1.41  | 1.93E-09 | Cdc42ep2      | protein_coding | 4.82  | 5.21  | 4.68  | 5.58  | 6.49  | 6.13  | 6.44  | 6.61  |
| Up   | ENSMUSG00000020937  | 1.05  | 1.97E-09 | Picd3         | protein_coding | 5.53  | 5.52  | 5.20  | 5.76  | 6.60  | 6.54  | 6.38  | 6.48  |
| Down | ENSMUSG00000047428  | -1.07 | 1.99E-09 | Dlk2          | protein_coding | 5.88  | 6.06  | 6.20  | 6.00  | 5.20  | 4.90  | 5.23  | 4.90  |
| Up   | ENSMUSG00000035202  | 1.06  | 2.03E-09 | Lars2         | protein_coding | 11.96 | 11.95 | 11.98 | 12.08 | 13.38 | 12.71 | 13.24 | 12.77 |
| Down | ENSMUSG00000022286  | -1.91 | 2.03E-09 | Grlh2         | protein_coding | 4.32  | 4.61  | 5.07  | 4.70  | 3.45  | 3.11  | 3.13  | 3.48  |
| Down | ENSMUSG00000047810  | -1.48 | 2.31E-09 | Ccdc88b       | protein_coding | 5.69  | 5.46  | 5.24  | 5.14  | 4.19  | 4.27  | 4.13  | 3.95  |
| Up   | ENSMUSG00000042514  | 1.80  | 2.32E-09 | Klhl14        | protein_coding | 4.51  | 4.50  | 3.80  | 4.09  | 5.63  | 5.61  | 4.85  | 6.12  |
| Down | ENSMUSG00000041974  | -1.30 | 2.35E-09 | Spidr         | protein_coding | 6.32  | 6.53  | 6.42  | 6.22  | 5.27  | 4.82  | 5.14  | 5.42  |
| Down | ENSMUSG00000039646  | -1.30 | 2.37E-09 | Vsnl          | protein_coding | 5.28  | 5.17  | 5.93  | 5.44  | 3.69  | 4.13  | 4.63  | 4.48  |
| Down | ENSMUSG00000090863  |       |          |               |                |       |       |       |       |       |       |       |       |

|      |                    |       |          |               |                |      |      |      |      |       |      |      |      |
|------|--------------------|-------|----------|---------------|----------------|------|------|------|------|-------|------|------|------|
| Down | ENSMUSG00000028228 | -1.10 | 2.61E-09 | Cpne3         | protein_coding | 6.63 | 6.15 | 6.45 | 6.92 | 5.86  | 5.24 | 5.41 | 5.56 |
| Down | ENSMUSG00000031698 | -2.29 | 2.63E-09 | Mylk3         | protein_coding | 5.04 | 5.00 | 4.87 | 4.70 | 3.17  | 2.92 | 2.79 | 3.78 |
| Down | ENSMUSG00000033923 | -1.43 | 2.64E-09 | Igfbp2        | protein_coding | 7.43 | 6.66 | 6.36 | 7.57 | 5.50  | 5.98 | 5.64 | 5.76 |
| Down | ENSMUSG00000032548 | -2.31 | 2.69E-09 | Sico2a1       | protein_coding | 5.51 | 5.63 | 5.70 | 5.57 | 4.00  | 3.22 | 2.86 | 4.28 |
| Up   | ENSMUSG00000027359 | 1.04  | 2.71E-09 | Sic27a2       | protein_coding | 5.79 | 5.38 | 5.59 | 5.14 | 6.48  | 6.53 | 6.29 | 6.53 |
| Down | ENSMUSG00000027287 | -1.15 | 2.86E-09 | Snap23        | protein_coding | 6.67 | 6.51 | 6.37 | 6.54 | 5.44  | 5.02 | 5.07 | 6.02 |
| Down | ENSMUSG00000016194 | -2.06 | 2.88E-09 | Hsf1f1b1      | protein_coding | 6.35 | 6.19 | 6.30 | 6.19 | 4.19  | 3.66 | 4.19 | 4.67 |
| Up   | ENSMUSG00000019865 | 1.83  | 2.93E-09 | Nmr1          | protein_coding | 4.67 | 5.02 | 3.80 | 4.28 | 5.97  | 6.48 | 6.09 | 5.97 |
| Down | ENSMUSG00000037353 | -1.00 | 3.07E-09 | Letmd1        | protein_coding | 7.49 | 7.76 | 7.60 | 7.55 | 6.30  | 6.70 | 6.55 | 6.90 |
| Down | ENSMUSG00000019359 | -2.48 | 3.08E-09 | Gdgd2         | protein_coding | 4.80 | 4.58 | 5.31 | 5.25 | 2.25  | 2.98 | 3.35 | 3.81 |
| Down | ENSMUSG00000029484 | -2.26 | 3.09E-09 | Arxa3         | protein_coding | 5.12 | 5.55 | 5.00 | 5.24 | 3.17  | 2.34 | 4.07 | 3.74 |
| Down | ENSMUSG00000046269 | -1.01 | 3.12E-09 | Usp27x        | protein_coding | 7.22 | 7.16 | 6.91 | 6.93 | 5.83  | 5.87 | 6.23 | 6.36 |
| Down | ENSMUSG00000068270 | -1.51 | 3.16E-09 | Shroom4       | protein_coding | 5.39 | 5.76 | 5.48 | 6.31 | 4.49  | 3.91 | 4.57 | 4.74 |
| Up   | ENSMUSG00000037568 | 1.72  | 3.23E-09 | Vash2         | protein_coding | 4.51 | 4.64 | 4.75 | 4.92 | 5.82  | 6.40 | 6.50 | 6.28 |
| Up   | ENSMUSG00000028164 | 1.22  | 3.23E-09 | Manba         | protein_coding | 6.05 | 5.72 | 6.06 | 6.11 | 7.20  | 7.18 | 7.17 | 7.10 |
| Down | ENSMUSG00000022309 | -2.24 | 3.27E-09 | Angpt1        | protein_coding | 5.57 | 5.98 | 5.79 | 5.59 | 4.06  | 2.70 | 3.71 | 4.43 |
| Down | ENSMUSG00000046417 | -1.54 | 3.31E-09 | Lrrc75a       | protein_coding | 5.31 | 5.78 | 5.48 | 5.90 | 3.40  | 4.83 | 4.54 | 4.02 |
| Down | ENSMUSG00000015947 | -3.20 | 3.38E-09 | Fcgr1         | protein_coding | 4.72 | 4.79 | 4.25 | 4.45 | 3.17  | 2.00 | 2.85 | 2.00 |
| Down | ENSMUSG00000035104 | -2.41 | 3.56E-09 | Eva1a         | protein_coding | 5.88 | 5.87 | 5.97 | 5.44 | 4.39  | 3.80 | 2.00 | 4.02 |
| Up   | ENSMUSG00000073185 | 1.08  | 3.70E-09 | Chmi1         | protein_coding | 6.72 | 6.69 | 6.77 | 7.32 | 7.70  | 7.70 | 7.89 | 7.89 |
| Down | ENSMUSG00000034200 | -2.07 | 3.70E-09 | Fcgr1         | protein_coding | 5.36 | 5.41 | 5.25 | 5.70 | 3.05  | 4.00 | 4.00 | 3.81 |
| Down | ENSMUSG00000037395 | -1.00 | 3.85E-09 | N4bp2         | protein_coding | 7.00 | 7.11 | 7.09 | 7.28 | 6.09  | 6.18 | 5.59 | 6.62 |
| Down | ENSMUSG00000032985 | -1.56 | 4.04E-09 | 5730522E02Rik | protein_coding | 4.98 | 5.10 | 5.17 | 5.34 | 4.16  | 3.94 | 3.45 | 3.89 |
| Down | ENSMUSG00000026389 | -1.49 | 4.09E-09 | Steap3        | protein_coding | 5.23 | 4.95 | 5.05 | 4.82 | 4.19  | 3.56 | 3.71 | 3.74 |
| Down | ENSMUSG00000027001 | -1.10 | 4.27E-09 | Dusp19        | protein_coding | 6.73 | 6.93 | 6.85 | 7.16 | 6.20  | 5.59 | 6.05 | 5.58 |
| Down | ENSMUSG00000032122 | -1.48 | 4.28E-09 | Sic37a2       | protein_coding | 5.33 | 5.44 | 4.87 | 5.19 | 4.28  | 3.91 | 3.40 | 4.23 |
| Down | ENSMUSG00000058099 | -2.56 | 4.48E-09 | Nfam1         | protein_coding | 5.15 | 4.93 | 4.27 | 5.16 | 3.04  | 3.52 | 2.00 | 3.34 |
| Down | ENSMUSG00000052384 | -1.72 | 4.57E-09 | Nrros         | protein_coding | 5.48 | 5.67 | 5.61 | 5.53 | 3.81  | 3.47 | 4.07 | 4.75 |
| Up   | ENSMUSG00000023266 | 1.13  | 4.62E-09 | Frs3          | protein_coding | 6.43 | 6.65 | 6.39 | 6.70 | 7.90  | 7.70 | 7.34 | 7.59 |
| Down | ENSMUSG00000022297 | -2.09 | 4.64E-09 | Fzd6          | protein_coding | 5.57 | 5.52 | 5.60 | 5.38 | 2.97  | 3.80 | 3.67 | 4.36 |
| Up   | ENSMUSG00000028883 | 1.13  | 4.73E-09 | Sema3a        | protein_coding | 5.96 | 5.97 | 5.85 | 6.53 | 6.52  | 6.52 | 7.28 | 7.35 |
| Down | ENSMUSG00000021226 | -1.33 | 4.78E-09 | Aco2          | protein_coding | 6.35 | 6.07 | 6.47 | 6.48 | 5.50  | 5.32 | 4.65 | 4.88 |
| Down | ENSMUSG00000020154 | -1.03 | 4.81E-09 | Ptpnb         | protein_coding | 6.31 | 6.74 | 6.24 | 6.33 | 4.74  | 5.17 | 5.17 | 5.65 |
| Down | ENSMUSG00000028011 | -3.41 | 4.87E-09 | Fcgr2         | protein_coding | 4.93 | 5.25 | 4.50 | 5.02 | 2.47  | 3.33 | 2.00 | 3.06 |
| Down | ENSMUSG00000024913 | -1.54 | 4.91E-09 | Lrp5          | protein_coding | 6.29 | 6.42 | 6.31 | 6.05 | 5.11  | 4.89 | 3.83 | 5.28 |
| Down | ENSMUSG00000090667 | -4.10 | 5.09E-09 | Gm765         | protein_coding | 3.72 | 3.73 | 4.30 | 4.34 | 2.47  | 2.00 | 2.35 | 2.12 |
| Down | ENSMUSG00000020513 | -1.28 | 5.49E-09 | Tubd1         | protein_coding | 5.53 | 5.41 | 5.60 | 5.81 | 4.36  | 4.16 | 4.81 | 4.48 |
| Down | ENSMUSG00000036381 | -2.78 | 5.54E-09 | P2ry14        | protein_coding | 5.17 | 5.02 | 5.17 | 5.38 | 2.24  | 3.87 | 3.39 | 3.98 |
| Down | ENSMUSG00000041134 | -2.59 | 5.73E-09 | Cyrr1         | protein_coding | 5.06 | 5.36 | 5.17 | 5.02 | 2.47  | 3.80 | 2.35 | 3.62 |
| Down | ENSMUSG00000037621 | -2.96 | 5.80E-09 | Atoh8         | protein_coding | 4.54 | 4.53 | 4.46 | 4.89 | 2.37  | 2.44 | 2.00 | 3.57 |
| Up   | ENSMUSG00000021255 | 2.10  | 6.01E-09 | Esrb          | protein_coding | 4.77 | 3.83 | 3.75 | 4.53 | 6.40  | 6.21 | 5.67 | 6.18 |
| Up   | ENSMUSG00000060923 | 1.22  | 6.07E-09 | Acyp2         | protein_coding | 6.54 | 6.48 | 6.48 | 6.49 | 7.36  | 7.74 | 7.83 | 7.75 |
| Up   | ENSMUSG00000047507 | 1.84  | 6.16E-09 | Baiap3        | protein_coding | 4.51 | 5.52 | 5.37 | 5.70 | 6.71  | 7.54 | 6.24 | 7.44 |
| Down | ENSMUSG00000016239 | -1.15 | 6.26E-09 | Lonr3         | protein_coding | 6.12 | 6.55 | 6.81 | 6.74 | 5.37  | 5.85 | 5.47 | 5.24 |
| Up   | ENSMUSG00000027996 | 2.31  | 6.28E-09 | Sfrp2         | protein_coding | 3.44 | 3.88 | 4.71 | 5.42 | 4.19  | 5.79 | 6.26 | 5.86 |
| Down | ENSMUSG00000041390 | -2.49 | 6.88E-09 | Mdfic         | protein_coding | 6.13 | 5.52 | 5.56 | 5.56 | 3.81  | 2.66 | 3.97 | 4.46 |
| Down | ENSMUSG00000028228 | -2.84 | 7.12E-09 | Hiv2b         | protein_coding | 3.86 | 3.19 | 3.36 | 3.36 | 2.44  | 2.57 | 2.00 | 2.44 |
| Up   | ENSMUSG00000018589 | 1.32  | 7.22E-09 | Cir2          | protein_coding | 5.55 | 5.97 | 5.46 | 6.30 | 7.14  | 7.37 | 6.74 | 7.17 |
| Down | ENSMUSG00000044317 | -1.71 | 7.44E-09 | Gpr4          | protein_coding | 4.54 | 4.72 | 4.82 | 4.74 | 3.73  | 2.70 | 3.24 | 3.81 |
| Down | ENSMUSG00000064357 | -6.47 | 7.51E-09 | mt-Atp6       | protein_coding | 3.38 | 3.19 | 3.23 | 3.45 | 2.00  | 2.00 | 2.00 | 2.00 |
| Up   | ENSMUSG00000036098 | 1.17  | 7.59E-09 | Myrf          | protein_coding | 9.00 | 8.63 | 8.77 | 8.56 | 10.41 | 9.19 | 9.86 | 9.94 |
| Down | ENSMUSG00000033420 | -1.29 | 7.72E-09 | Antxr1        | protein_coding | 6.91 | 7.13 | 7.00 | 7.09 | 6.30  | 4.60 | 5.87 | 5.98 |
| Up   | ENSMUSG00000020061 | 1.54  | 7.89E-09 | Mybpc1        | protein_coding | 5.10 | 5.95 | 5.69 | 5.17 | 6.99  | 6.71 | 7.54 | 6.40 |
| Down | ENSMUSG00000033717 | -1.29 | 7.92E-09 | Adra2a        | protein_coding | 6.56 | 6.64 | 6.49 | 6.78 | 4.70  | 5.80 | 5.10 | 5.77 |
| Down | ENSMUSG00000030409 | -1.77 | 7.95E-09 | Dmpk          | protein_coding | 5.55 | 5.31 | 4.73 | 5.54 | 3.43  | 3.43 | 3.35 | 4.14 |
| Down | ENSMUSG00000030220 | -2.19 | 7.97E-09 | Arhgdib       | protein_coding | 5.15 | 5.91 | 5.09 | 5.19 | 2.37  | 3.47 | 4.04 | 4.02 |
| Down | ENSMUSG00000064201 | -3.02 | 8.06E-09 | Krt2          | protein_coding | 5.12 | 5.59 | 5.52 | 5.20 | 3.42  | 3.22 | 3.07 | 3.74 |
| Down | ENSMUSG00000039217 | -1.51 | 8.08E-09 | Il18          | protein_coding | 5.92 | 5.68 | 5.75 | 5.75 | 5.05  | 4.16 | 3.67 | 4.55 |
| Down | ENSMUSG00000038147 | -2.20 | 8.14E-09 | Cd84          | protein_coding | 4.18 | 5.35 | 5.35 | 5.07 | 3.35  | 2.78 | 3.45 | 3.78 |
| Down | ENSMUSG00000070436 | -1.76 | 8.20E-09 | Serpinh1      | protein_coding | 5.91 | 5.63 | 5.45 | 5.52 | 4.36  | 4.64 | 3.19 | 3.95 |
| Up   | ENSMUSG00000010057 | 1.03  | 8.31E-09 | Nbr2          | protein_coding | 6.50 | 6.05 | 6.14 | 6.09 | 7.21  | 7.10 | 7.44 | 7.00 |
| Down | ENSMUSG00000029661 | -2.05 | 8.31E-09 | Col1a2        | protein_coding | 5.54 | 5.91 | 6.01 | 6.05 | 5.09  | 3.33 | 3.30 | 3.99 |
| Down | ENSMUSG00000052142 | -2.51 | 8.33E-09 | Rasal3        | protein_coding | 4.29 | 4.17 | 4.60 | 4.53 | 2.82  | 3.17 | 2.35 | 2.78 |
| Up   | ENSMUSG00000025141 | 1.92  | 8.37E-09 | Myadm12       | protein_coding | 4.18 | 3.88 | 4.09 | 4.78 | 5.94  | 6.44 | 5.47 | 5.81 |
| Down | ENSMUSG00000036446 | -4.70 | 8.39E-09 | Lum           | protein_coding | 3.25 | 4.20 | 4.80 | 4.72 | 2.00  | 2.44 | 2.00 | 2.34 |
| Up   | ENSMUSG00000045094 | 1.64  | 8.56E-09 | Arhgef37      | protein_coding | 5.00 | 5.08 | 4.65 | 4.53 | 6.50  | 6.08 | 6.53 | 6.12 |
| Up   | ENSMUSG00000108011 | 1.43  | 8.56E-09 | Gm44596       | protein_coding | 5.23 | 5.46 | 5.29 | 5.37 | 6.70  | 6.66 | 6.83 | 6.47 |
| Down | ENSMUSG00000061232 | -1.89 | 8.60E-09 | H2-K1         | protein_coding | 5.71 | 5.58 | 5.50 | 5.71 | 3.96  | 3.43 | 4.00 | 4.50 |
| Down | ENSMUSG00000001247 | -2.21 | 8.67E-09 | Lsr           | protein_coding | 4.75 | 5.19 | 4.89 | 5.02 | 2.90  | 2.00 | 2.00 | 3.53 |
| Down | ENSMUSG00000040987 | -3.61 | 8.68E-09 | Mill2         | protein_coding | 3.25 | 4.53 | 4.34 | 4.67 | 2.44  | 4.14 | 2.24 | 2.69 |
| Up   | ENSMUSG00000068876 | 1.20  | 8.90E-09 | Cgn           | protein_coding | 5.47 | 5.28 | 5.20 | 5.60 | 6.09  | 6.81 | 6.46 | 6.45 |
| Up   | ENSMUSG00000039103 | 1.51  | 8.99E-09 | Nexn          | protein_coding | 5.36 | 4.72 | 4.30 | 4.87 | 6.37  | 5.60 | 6.74 | 5.99 |
| Down | ENSMUSG00000028228 | -2.71 | 9.21E-09 | F11r          | protein_coding | 5.13 | 4.79 | 4.65 | 5.24 | 2.13  | 3.44 | 3.44 | 3.59 |
| Down | ENSMUSG00000041515 | -1.96 | 9.27E-09 | Irf9          | protein_coding | 5.84 | 5.43 | 5.91 | 5.95 | 4.44  | 2.62 | 3.40 | 4.11 |
| Down | ENSMUSG00000032377 | -2.50 | 9.29E-09 | Plscr4        | protein_coding | 3.81 | 4.50 | 5.15 | 5.22 | 3.11  | 2.44 | 3.13 | 3.29 |
| Down | ENSMUSG00000031239 | -1.42 | 9.51E-09 | Itm2a         | protein_coding | 5.28 | 5.68 | 5.94 | 5.84 | 4.03  | 4.70 | 4.38 | 4.63 |
| Down | ENSMUSG00000041703 | -2.19 | 9.76E-09 | Zic5          | protein_coding | 6.05 | 6.22 | 6.05 | 6.43 | 3.35  | 4.78 | 3.00 | 4.87 |
| Down | ENSMUSG00000022610 | -2.93 | 9.83E-09 | Mapk12        | protein_coding | 4.03 | 4.47 | 4.17 | 4.19 | 2.74  | 2.24 | 2.13 | 2.99 |
| Down | ENSMUSG00000039552 | -2.53 | 9.85E-09 | Rsph4a        | protein_coding | 5.82 | 5.93 | 5.64 | 6.42 | 3.52  | 4.47 | 2.54 | 4.23 |
| Down | ENSMUSG00000044092 | -4.05 | 9.95E-09 | C130050O18Rik | protein_coding | 3.31 | 3.68 | 4.17 | 3.55 | 2.00  | 2.44 | 2.00 | 2.24 |
| Down | ENSMUSG00000048703 | -2.58 | 1.01E-08 | Speer4b       | protein_coding | 3.99 | 3.68 | 4.05 | 3.60 | 2.37  | 3.05 | 2.13 | 2.34 |
| Down | ENSMUSG00000044258 | -4.14 | 1.02E-08 | Ctla2a        | protein_coding | 4.89 | 4.61 | 3.84 | 3.55 | 2.00  | 2.70 | 2.00 | 2.34 |
| Down | ENSMUSG00000096736 | -3.76 | 1.02E-08 | Gm17535       | protein_coding | 9.32 | 9.58 | 9.32 | 9.93 | 5.36  | 6.16 | 4.75 | 6.61 |
| Down | ENSMUSG00000078453 | -1.85 | 1.04E-08 | Abracl        | protein_coding | 6.30 | 6.15 | 6.10 | 6.34 | 3.50  | 5.25 | 4.24 | 4.72 |
| Up   | ENSMUSG00000039046 | 1.57  | 1.05E-08 | Usp6nl        | protein_coding | 4.26 | 3.73 | 3.97 | 4.60 | 5.76  | 5.52 | 5.29 | 5.42 |
| Down | ENSMUSG00000035000 | -1.72 | 1.06E-08 | Dpp4          | protein_coding | 4.65 | 5.47 | 5.43 | 5.19 | 3.64  | 3.94 | 3.50 | 4.11 |
| Down | ENSMUSG00000032501 | -1.34 | 1.07E-08 | Tnfr1         | protein_coding | 6.86 | 6.82 | 6.73 | 6.40 | 4.82  | 6.09 | 5.27 | 5.35 |
| Down | ENSMUSG00000018459 | -1.84 | 1.08E-08 | Sic13a3       |                |      |      |      |      |       |      |      |      |

|      |                     |       |          |               |                |      |       |      |       |      |      |      |      |
|------|---------------------|-------|----------|---------------|----------------|------|-------|------|-------|------|------|------|------|
| Down | ENSMUSG00000017754  | -1.27 | 1.18E-08 | PtIp          | protein_coding | 6.80 | 6.28  | 6.71 | 7.11  | 5.06 | 5.95 | 5.60 | 5.48 |
| Down | ENSMUSG00000027330  | -1.23 | 1.18E-08 | Cdc25b        | protein_coding | 6.00 | 5.82  | 5.67 | 5.98  | 4.92 | 4.40 | 4.61 | 5.06 |
| Down | ENSMUSG00000050944  | -1.14 | 1.18E-08 | Efcab5        | protein_coding | 6.85 | 6.64  | 6.67 | 6.56  | 5.51 | 5.20 | 6.09 | 5.48 |
| Down | ENSMUSG000000102758 | -1.13 | 1.18E-08 | Naaladl2      | protein_coding | 5.48 | 5.77  | 5.38 | 6.02  | 4.78 | 4.99 | 4.35 | 4.55 |
| Down | ENSMUSG00000072115  | -3.37 | 1.23E-08 | Ang           | protein_coding | 3.81 | 4.24  | 4.05 | 4.50  | 2.00 | 2.44 | 2.45 | 2.70 |
| Down | ENSMUSG000000023271 | -1.56 | 1.28E-08 | Col14a1       | protein_coding | 5.10 | 5.70  | 5.17 | 5.53  | 3.64 | 4.16 | 4.47 | 3.92 |
| Down | ENSMUSG000000220291 | -2.00 | 1.29E-08 | Diag3l        | protein_coding | 5.41 | 5.10  | 5.05 | 5.37  | 4.13 | 2.98 | 3.67 | 3.62 |
| Down | ENSMUSG00000025400  | -2.85 | 1.30E-08 | Tac2          | protein_coding | 4.67 | 3.46  | 4.01 | 4.67  | 2.47 | 2.78 | 2.45 | 2.70 |
| Down | ENSMUSG00000006720  | -1.68 | 1.31E-08 | Zfp184        | protein_coding | 5.19 | 5.06  | 5.07 | 5.12  | 3.23 | 4.24 | 3.24 | 4.02 |
| Down | ENSMUSG000000118819 | -2.50 | 1.32E-08 | Lsp1          | protein_coding | 4.62 | 4.95  | 5.09 | 5.12  | 2.13 | 2.85 | 3.13 | 3.89 |
| Down | ENSMUSG000000068617 | -1.45 | 1.33E-08 | Efcab1        | protein_coding | 6.73 | 6.34  | 6.18 | 7.01  | 5.40 | 5.79 | 4.61 | 4.92 |
| Down | ENSMUSG00000070564  | -2.55 | 1.34E-08 | Ntn5          | protein_coding | 5.28 | 4.97  | 5.15 | 4.94  | 3.23 | 2.24 | 3.45 | 3.53 |
| Down | ENSMUSG00000003418  | -1.81 | 1.38E-08 | St8sia6       | protein_coding | 5.65 | 5.87  | 5.88 | 6.14  | 4.25 | 4.16 | 3.45 | 4.97 |
| Down | ENSMUSG00000043943  | -1.98 | 1.45E-08 | Naalad2       | protein_coding | 4.54 | 4.97  | 4.89 | 4.96  | 3.04 | 3.56 | 3.30 | 3.48 |
| Up   | ENSMUSG00000027313  | 1.50  | 1.46E-08 | Chac1         | protein_coding | 4.45 | 4.79  | 4.17 | 4.34  | 6.08 | 5.58 | 5.80 | 5.56 |
| Down | ENSMUSG00000043541  | -2.59 | 1.49E-08 | Casc1         | protein_coding | 5.15 | 4.64  | 4.97 | 5.31  | 2.78 | 2.78 | 3.59 | 3.48 |
| Down | ENSMUSG00000031620  | -5.01 | 1.51E-08 | Iqcm          | protein_coding | 4.07 | 4.09  | 3.23 | 4.31  | 2.00 | 2.34 | 2.00 | 2.12 |
| Down | ENSMUSG00000020548  | -2.92 | 1.56E-08 | 1700086D15Rik | protein_coding | 3.31 | 3.92  | 3.80 | 4.19  | 2.00 | 2.34 | 2.00 | 3.06 |
| Down | ENSMUSG000000093910 | -1.45 | 1.59E-08 | Zfp853        | protein_coding | 5.85 | 5.92  | 6.06 | 6.18  | 4.36 | 4.44 | 4.43 | 5.35 |
| Down | ENSMUSG000000221198 | -1.44 | 1.61E-08 | Famr1         | protein_coding | 5.69 | 5.47  | 5.11 | 5.83  | 4.16 | 4.47 | 4.69 | 4.11 |
| Down | ENSMUSG000000520566 | -1.76 | 1.66E-08 | Zfp217        | protein_coding | 5.45 | 5.23  | 5.82 | 5.11  | 5.49 | 4.16 | 4.16 | 3.99 |
| Down | ENSMUSG00000036918  | -1.27 | 1.67E-08 | Tct7          | protein_coding | 5.47 | 5.60  | 5.85 | 6.11  | 4.70 | 4.19 | 4.54 | 5.05 |
| Up   | ENSMUSG00000002731  | 1.21  | 1.68E-08 | Pkrra         | protein_coding | 5.76 | 5.71  | 6.23 | 6.08  | 7.07 | 7.23 | 7.27 | 6.89 |
| Down | ENSMUSG00000027107  | -2.55 | 1.68E-08 | Chma1         | protein_coding | 4.51 | 4.13  | 4.70 | 5.04  | 2.47 | 3.28 | 2.54 | 3.17 |
| Down | ENSMUSG00000044026  | -2.09 | 1.76E-08 | Slc35g1       | protein_coding | 4.84 | 4.69  | 4.52 | 4.58  | 2.90 | 3.38 | 3.35 | 2.99 |
| Up   | ENSMUSG00000045532  | 1.06  | 1.77E-08 | C1ql1         | protein_coding | 5.78 | 6.10  | 5.81 | 5.98  | 7.21 | 6.91 | 6.66 | 6.90 |
| Up   | ENSMUSG00000005980  | 1.01  | 1.83E-08 | Dnase1        | protein_coding | 5.86 | 5.55  | 5.48 | 5.54  | 6.47 | 6.89 | 6.43 | 6.41 |
| Down | ENSMUSG00000053113  | -2.23 | 1.85E-08 | Socs3         | protein_coding | 4.48 | 4.47  | 4.20 | 4.34  | 2.97 | 2.53 | 3.07 | 3.06 |
| Down | ENSMUSG00000017724  | -1.62 | 1.89E-08 | Etv4          | protein_coding | 5.19 | 5.19  | 5.73 | 5.19  | 3.50 | 3.80 | 4.00 | 4.48 |
| Up   | ENSMUSG00000092035  | 1.15  | 1.90E-08 | Peg10         | protein_coding | 7.56 | 7.92  | 7.09 | 7.52  | 8.47 | 8.93 | 8.03 | 9.09 |
| Down | ENSMUSG00000032586  | -1.49 | 1.90E-08 | Traip         | protein_coding | 5.70 | 5.96  | 6.13 | 5.60  | 4.06 | 5.16 | 4.10 | 4.55 |
| Down | ENSMUSG00000050296  | -2.54 | 1.93E-08 | Abca12        | protein_coding | 5.78 | 5.55  | 4.93 | 5.78  | 3.74 | 3.52 | 3.79 | 3.57 |
| Down | ENSMUSG00000026414  | -2.17 | 2.09E-08 | Fmn1          | protein_coding | 5.38 | 5.59  | 5.76 | 5.40  | 3.06 | 4.13 | 3.92 | 3.92 |
| Up   | ENSMUSG00000031531  | 1.16  | 2.11E-08 | Gpn2          | protein_coding | 4.72 | 5.19  | 4.62 | 5.40  | 6.82 | 6.60 | 6.44 | 6.44 |
| Down | ENSMUSG00000048602  | -1.36 | 2.16E-08 | Morc2b        | protein_coding | 5.57 | 5.60  | 5.55 | 5.69  | 4.76 | 3.98 | 4.10 | 4.68 |
| Down | ENSMUSG000000110104 | -3.03 | 2.18E-08 | Gm45717       | protein_coding | 4.11 | 4.27  | 4.13 | 4.02  | 2.97 | 2.70 | 2.00 | 2.70 |
| Down | ENSMUSG00000023918  | -2.46 | 2.18E-08 | Adgrf4        | protein_coding | 4.22 | 4.58  | 4.24 | 4.60  | 2.25 | 3.38 | 2.79 | 2.70 |
| Down | ENSMUSG00000095115  | -2.61 | 2.19E-08 | ltpripl2      | protein_coding | 6.00 | 5.56  | 5.48 | 5.34  | 6.00 | 2.12 | 3.07 | 4.08 |
| Up   | ENSMUSG00000064179  | 2.15  | 2.20E-08 | Tnnt1         | protein_coding | 5.58 | 4.44  | 4.30 | 4.12  | 6.65 | 6.47 | 7.07 | 6.56 |
| Down | ENSMUSG00000005060  | -2.05 | 2.27E-08 | Gabra2        | protein_coding | 9.27 | 10.36 | 9.08 | 10.04 | 8.48 | 8.48 | 6.50 | 8.15 |
| Down | ENSMUSG00000040253  | -1.71 | 2.29E-08 | Gbp7          | protein_coding | 5.23 | 5.17  | 5.13 | 4.91  | 3.92 | 3.84 | 3.07 | 3.95 |
| Up   | ENSMUSG00000036913  | 1.03  | 2.38E-08 | Trim67        | protein_coding | 5.62 | 5.47  | 5.59 | 5.63  | 6.74 | 6.44 | 6.74 | 6.19 |
| Down | ENSMUSG00000053997  | -1.91 | 2.38E-08 | Slc39a8       | protein_coding | 4.89 | 4.69  | 4.95 | 4.60  | 2.74 | 3.52 | 3.40 | 3.62 |
| Down | ENSMUSG00000041380  | -1.73 | 2.39E-08 | Htr2c         | protein_coding | 7.93 | 7.50  | 7.66 | 8.34  | 6.13 | 6.05 | 5.14 | 6.97 |
| Up   | ENSMUSG00000036278  | 1.29  | 2.40E-08 | Macrocl1      | protein_coding | 5.62 | 5.68  | 5.82 | 5.67  | 6.96 | 7.07 | 6.98 | 6.67 |
| Down | ENSMUSG00000021281  | -2.10 | 2.40E-08 | Tnfrap2       | protein_coding | 4.80 | 5.02  | 5.15 | 5.05  | 3.11 | 3.65 | 3.50 | 3.29 |
| Up   | ENSMUSG00000023098  | 1.32  | 2.41E-08 | Pcbp1         | protein_coding | 4.22 | 4.95  | 4.46 | 5.97  | 5.54 | 6.61 | 5.97 | 5.75 |
| Down | ENSMUSG00000035004  | -3.44 | 2.41E-08 | Igsf6         | protein_coding | 3.95 | 3.92  | 3.36 | 3.90  | 2.74 | 2.00 | 2.00 | 2.54 |
| Down | ENSMUSG00000004655  | -4.65 | 2.47E-08 | Aqp1          | protein_coding | 4.75 | 3.39  | 2.93 | 4.70  | 2.00 | 2.00 | 2.00 | 2.62 |
| Down | ENSMUSG00000024292  | -2.09 | 2.47E-08 | Cyp4f14       | protein_coding | 5.24 | 4.86  | 5.48 | 4.91  | 4.06 | 3.56 | 2.71 | 3.39 |
| Up   | ENSMUSG00000037904  | 1.24  | 2.54E-08 | Ankrd9        | protein_coding | 5.69 | 5.71  | 5.57 | 5.62  | 6.78 | 7.11 | 6.79 | 6.53 |
| Down | ENSMUSG00000033488  | -1.97 | 2.64E-08 | Cryz12        | protein_coding | 5.17 | 4.64  | 5.11 | 4.89  | 3.69 | 2.98 | 3.00 | 3.92 |
| Down | ENSMUSG00000026222  | -2.29 | 2.70E-08 | Sp100         | protein_coding | 4.82 | 4.61  | 4.85 | 5.11  | 3.23 | 2.70 | 2.79 | 3.78 |
| Down | ENSMUSG00000026656  | -2.78 | 2.75E-08 | Fcgr2b        | protein_coding | 5.55 | 5.25  | 4.80 | 4.91  | 2.57 | 3.11 | 2.45 | 3.85 |
| Down | ENSMUSG00000078234  | -3.73 | 2.77E-08 | Klhd37a       | protein_coding | 6.68 | 6.39  | 6.55 | 6.71  | 6.91 | 2.37 | 2.00 | 4.23 |
| Down | ENSMUSG00000028487  | -2.54 | 2.77E-08 | Bnc2          | protein_coding | 4.98 | 5.25  | 4.82 | 4.80  | 2.00 | 3.52 | 2.45 | 3.74 |
| Down | ENSMUSG00000094840  | -3.24 | 2.80E-08 | Muc3a         | protein_coding | 3.31 | 3.83  | 4.09 | 2.13  | 2.34 | 4.02 | 2.53 | 2.38 |
| Down | ENSMUSG00000025574  | -2.66 | 2.81E-08 | Tk1           | protein_coding | 4.36 | 4.72  | 4.40 | 2.00  | 2.53 | 2.54 | 2.54 | 3.44 |
| Down | ENSMUSG00000020905  | -1.90 | 2.89E-08 | Usp43         | protein_coding | 4.36 | 5.06  | 4.27 | 4.37  | 2.90 | 2.85 | 3.54 | 3.39 |
| Down | ENSMUSG00000034786  | -2.28 | 2.94E-08 | Gpsm3         | protein_coding | 4.48 | 4.67  | 3.93 | 4.37  | 3.11 | 2.24 | 2.79 | 3.29 |
| Down | ENSMUSG00000032419  | -2.47 | 2.97E-08 | Tbx18         | protein_coding | 4.36 | 4.50  | 4.43 | 4.68  | 2.66 | 2.92 | 2.45 | 3.29 |
| Down | ENSMUSG00000029084  | -2.83 | 3.21E-08 | Cd38          | protein_coding | 5.79 | 5.36  | 5.79 | 5.58  | 2.34 | 2.34 | 2.35 | 4.08 |
| Up   | ENSMUSG00000025384  | 1.00  | 3.24E-08 | Faap100       | protein_coding | 6.09 | 5.95  | 5.69 | 5.77  | 7.09 | 6.84 | 6.69 | 6.69 |
| Down | ENSMUSG00000059136  | -1.91 | 3.30E-08 | Olfir539      | protein_coding | 5.21 | 4.97  | 4.95 | 5.16  | 3.04 | 3.43 | 3.83 | 3.85 |
| Down | ENSMUSG00000055228  | -1.16 | 3.30E-08 | Zfp935        | protein_coding | 6.52 | 6.59  | 6.22 | 6.02  | 5.40 | 5.32 | 4.97 | 5.41 |
| Down | ENSMUSG00000047369  | -1.21 | 3.32E-08 | Dnah14        | protein_coding | 6.09 | 5.86  | 5.95 | 6.14  | 4.70 | 4.99 | 4.38 | 5.40 |
| Down | ENSMUSG00000006369  | -1.99 | 3.35E-08 | Fbln1         | protein_coding | 5.82 | 6.48  | 5.46 | 6.02  | 3.45 | 3.56 | 4.99 | 4.43 |
| Down | ENSMUSG00000038007  | -2.10 | 3.36E-08 | Acer2         | protein_coding | 5.41 | 5.17  | 5.52 | 5.34  | 3.81 | 3.52 | 2.45 | 4.31 |
| Down | ENSMUSG00000037474  | -1.97 | 3.48E-08 | Dtl           | protein_coding | 5.42 | 5.49  | 5.24 | 5.89  | 3.64 | 4.32 | 3.50 | 3.92 |
| Down | ENSMUSG00000069919  | -3.27 | 3.68E-08 | Hba-a1        | protein_coding | 5.19 | 5.12  | 5.17 | 5.16  | 3.35 | 2.76 | 2.62 | 3.38 |
| Up   | ENSMUSG00000035105  | 1.34  | 3.74E-08 | Egln3         | protein_coding | 5.00 | 5.59  | 5.29 | 5.34  | 6.78 | 6.33 | 6.88 | 6.16 |
| Down | ENSMUSG00000025083  | -1.39 | 4.03E-08 | Atfp112       | protein_coding | 5.48 | 5.70  | 5.78 | 5.94  | 4.90 | 4.44 | 3.59 | 4.79 |
| Down | ENSMUSG00000026040  | -2.18 | 4.20E-08 | Adamts12      | protein_coding | 5.23 | 5.43  | 5.07 | 4.48  | 3.69 | 2.24 | 3.69 | 3.74 |
| Down | ENSMUSG00000038760  | -2.23 | 4.20E-08 | Tfr1          | protein_coding | 6.01 | 6.07  | 6.07 | 6.50  | 8.82 | 6.07 | 4.87 | 4.31 |
| Up   | ENSMUSG00000028241  | 1.69  | 4.45E-08 | Npcc          | protein_coding | 4.39 | 4.64  | 4.05 | 4.15  | 5.78 | 5.88 | 6.00 | 5.50 |
| Down | ENSMUSG00000045655  | -3.38 | 4.60E-08 | Fam216b       | protein_coding | 4.67 | 4.72  | 3.93 | 4.60  | 2.00 | 3.11 | 2.24 | 2.54 |
| Down | ENSMUSG00000022383  | -2.55 | 4.69E-08 | Ppara         | protein_coding | 5.54 | 5.44  | 5.24 | 5.24  | 2.00 | 3.24 | 3.24 | 3.74 |
| Up   | ENSMUSG00000022555  | 1.13  | 4.81E-08 | Dgat1         | protein_coding | 5.23 | 5.97  | 5.59 | 5.40  | 6.31 | 7.11 | 6.48 | 6.48 |
| Down | ENSMUSG00000037185  | -3.86 | 4.81E-08 | Krt80         | protein_coding | 4.11 | 4.41  | 4.37 | 3.90  | 2.00 | 2.00 | 2.00 | 2.99 |
| Down | ENSMUSG00000025017  | -1.62 | 4.81E-08 | Pik3ap1       | protein_coding | 5.44 | 5.31  | 4.95 | 4.94  | 4.03 | 3.56 | 3.50 | 4.20 |
| Down | ENSMUSG00000026383  | -1.14 | 5.05E-08 | Epb4115       | protein_coding | 6.34 | 6.50  | 6.48 | 6.79  | 5.22 | 5.91 | 5.05 | 5.55 |
| Down | ENSMUSG00000033033  | -1.14 | 5.14E-08 | Calhm2        | protein_coding | 5.29 | 5.21  | 5.31 | 5.24  | 4.56 | 4.24 | 4.07 | 4.25 |
| Down | ENSMUSG00000074272  | -2.15 | 5.24E-08 | Ceacam1       | protein_coding | 4.45 | 4.58  | 4.97 | 4.50  | 2.78 | 2.78 | 3.83 | 3.12 |
| Up   | ENSMUSG00000033579  | 1.00  | 5.25E-08 | Fa2h          | protein_coding | 7.56 | 7.42  | 7.55 | 7.44  | 8.93 | 7.95 | 8.13 | 8.69 |
| Down | ENSMUSG00000031207  | -1.30 | 5.31E-08 | Msn           | protein_coding | 6.52 | 6.59  | 6.42 | 6.88  | 5.74 | 4.87 | 5.46 | 5.80 |
| Down | ENSMUSG00000048440  | -3.75 | 5.44E-08 | Msx1          | protein_coding | 5.99 | 5.06  | 5.78 | 6.47  | 2.66 | 2.24 | 2.35 | 4.05 |
| Down | ENSMUSG00000008444  | -2.92 | 5.49E-08 | Psn1          | protein_coding | 5.58 | 6.13  | 5.78 | 5.93  | 3.85 | 3.17 | 2.00 | 4.05 |
| Down | ENSMUSG00000027015  | -2.68 | 5.74E-08 |               |                |      |       |      |       |      |      |      |      |

|      |                    |       |          |                |                |       |       |       |       |       |       |       |       |
|------|--------------------|-------|----------|----------------|----------------|-------|-------|-------|-------|-------|-------|-------|-------|
| Down | ENSMUSG00000030413 | -3.64 | 6.19E-08 | Pglyrp1        | protein_coding | 3.61  | 3.92  | 3.60  | 3.69  | 2.00  | 2.00  | 2.00  | 2.78  |
| Down | ENSMUSG00000031883 | -1.19 | 6.20E-08 | Car7           | protein_coding | 6.19  | 6.28  | 6.69  | 5.81  | 5.12  | 5.11  | 5.44  | 5.00  |
| Down | ENSMUSG00000040613 | -2.44 | 6.23E-08 | Apobec1        | protein_coding | 4.57  | 4.79  | 4.30  | 4.78  | 2.25  | 3.47  | 2.54  | 3.23  |
| Up   | ENSMUSG00000032776 | 1.30  | 6.44E-08 | Mctp2          | protein_coding | 5.84  | 5.74  | 5.61  | 5.99  | 6.87  | 7.48  | 6.79  | 6.67  |
| Down | ENSMUSG00000029134 | -1.81 | 6.44E-08 | Ptb1           | protein_coding | 5.78  | 5.17  | 5.32  | 5.70  | 4.10  | 4.22  | 3.40  | 4.10  |
| Down | ENSMUSG00000007041 | -2.34 | 6.64E-08 | Clic1          | protein_coding | 4.84  | 4.79  | 5.15  | 5.19  | 3.92  | 2.12  | 2.71  | 3.62  |
| Down | ENSMUSG00000020448 | -2.85 | 6.98E-08 | Vmn2b5         | protein_coding | 3.31  | 4.24  | 3.49  | 2.80  | 4.37  | 2.00  | 2.79  | 2.62  |
| Down | ENSMUSG00000003271 | -1.40 | 7.08E-08 | Sult2b1        | protein_coding | 6.06  | 5.17  | 5.97  | 5.87  | 4.13  | 5.00  | 4.19  | 4.50  |
| Down | ENSMUSG00000010592 | -2.39 | 7.13E-08 | Dazl           | protein_coding | 4.91  | 4.97  | 3.97  | 4.96  | 2.90  | 2.34  | 3.50  | 3.29  |
| Down | ENSMUSG00000032334 | -2.45 | 7.20E-08 | Loxl1          | protein_coding | 4.91  | 5.12  | 4.80  | 4.85  | 3.11  | 3.73  | 2.00  | 3.23  |
| Down | ENSMUSG00000105993 | -6.56 | 7.29E-08 | Tex13c2        | protein_coding | 4.36  | 3.92  | 4.75  | 4.48  | 2.00  | 2.00  | 2.00  | 2.24  |
| Down | ENSMUSG00000043631 | -2.72 | 7.55E-08 | Ecm2           | protein_coding | 5.38  | 5.87  | 5.46  | 5.57  | 3.45  | 4.07  | 2.13  | 3.39  |
| Down | ENSMUSG00000001123 | -2.37 | 7.55E-08 | Lgals9         | protein_coding | 4.65  | 4.50  | 5.45  | 4.31  | 3.29  | 2.70  | 2.93  | 3.39  |
| Down | ENSMUSG00000019872 | -1.24 | 7.63E-08 | Smpd3a         | protein_coding | 6.32  | 6.13  | 6.30  | 6.54  | 5.22  | 5.74  | 4.52  | 4.98  |
| Down | ENSMUSG00000017057 | -1.73 | 7.76E-08 | Il13ra1        | protein_coding | 5.08  | 4.89  | 5.26  | 5.44  | 3.40  | 3.77  | 3.71  | 4.14  |
| Down | ENSMUSG00000009291 | -1.51 | 7.99E-08 | Pttg1ip        | protein_coding | 7.88  | 7.90  | 8.04  | 8.03  | 7.22  | 5.81  | 5.71  | 6.69  |
| Up   | ENSMUSG00000030790 | 2.37  | 8.10E-08 | Adm            | protein_coding | 2.94  | 3.97  | 3.60  | 3.65  | 5.67  | 5.67  | 5.11  | 5.47  |
| Up   | ENSMUSG00000003644 | 1.02  | 8.11E-08 | Rps8ka1        | protein_coding | 6.22  | 5.88  | 5.86  | 6.18  | 6.78  | 6.77  | 7.43  | 6.99  |
| Up   | ENSMUSG00000003271 | 2.53  | 8.19E-08 | Nnmt           | protein_coding | 2.94  | 2.95  | 2.74  | 3.15  | 4.62  | 4.76  | 4.45  | 4.68  |
| Down | ENSMUSG00000027356 | -1.77 | 8.47E-08 | Ferrm1         | protein_coding | 5.24  | 5.38  | 4.95  | 4.58  | 3.50  | 4.13  | 3.54  | 3.34  |
| Down | ENSMUSG00000026890 | -1.46 | 8.79E-08 | Stom           | protein_coding | 5.12  | 5.38  | 5.46  | 5.37  | 3.69  | 4.10  | 3.97  | 4.53  |
| Down | ENSMUSG00000031490 | -2.52 | 8.88E-08 | Eif4ebp1       | protein_coding | 4.65  | 4.44  | 4.54  | 4.28  | 2.47  | 2.00  | 3.50  | 2.99  |
| Down | ENSMUSG00000075602 | -2.55 | 8.89E-08 | Ly6a           | protein_coding | 4.57  | 4.47  | 4.01  | 3.82  | 2.82  | 2.98  | 2.63  | 2.34  |
| Down | ENSMUSG00000027160 | -1.14 | 8.90E-08 | Ccdc34         | protein_coding | 7.44  | 7.42  | 7.45  | 7.44  | 6.57  | 5.56  | 6.02  | 6.85  |
| Up   | ENSMUSG00000006411 | 1.30  | 8.93E-08 | Nectin4        | protein_coding | 5.23  | 4.95  | 4.95  | 5.33  | 5.97  | 6.75  | 6.33  | 6.14  |
| Down | ENSMUSG00000018752 | -1.47 | 9.04E-08 | Tnfrsf13       | protein_coding | 5.91  | 5.58  | 5.67  | 5.98  | 3.89  | 4.76  | 4.45  | 4.72  |
| Down | ENSMUSG00000045930 | -2.27 | 9.65E-08 | Clec14a        | protein_coding | 4.98  | 4.44  | 4.73  | 4.50  | 2.74  | 3.11  | 2.79  | 3.53  |
| Down | ENSMUSG00000015053 | -3.07 | 9.70E-08 | Gata2          | protein_coding | 4.36  | 4.17  | 4.24  | 4.09  | 2.25  | 2.34  | 2.00  | 3.17  |
| Down | ENSMUSG00000029625 | -1.04 | 1.02E-07 | Cpsf4          | protein_coding | 6.33  | 5.99  | 6.45  | 6.22  | 4.86  | 5.23  | 5.53  | 5.48  |
| Up   | ENSMUSG00000024053 | 1.47  | 1.03E-07 | Emilin2        | protein_coding | 5.45  | 5.06  | 4.89  | 4.98  | 6.79  | 6.74  | 5.96  | 6.22  |
| Down | ENSMUSG00000029254 | -2.23 | 1.05E-07 | Stap1          | protein_coding | 4.54  | 4.58  | 4.30  | 4.50  | 2.57  | 2.78  | 3.40  | 3.06  |
| Down | ENSMUSG00000032092 | -3.16 | 1.06E-07 | Mpx2           | protein_coding | 3.72  | 4.31  | 4.73  | 3.98  | 2.66  | 2.00  | 2.54  | 2.70  |
| Down | ENSMUSG00000033952 | -2.16 | 1.07E-07 | Aspm           | protein_coding | 4.54  | 4.54  | 4.75  | 5.17  | 2.74  | 5.15  | 4.25  | 4.11  |
| Down | ENSMUSG00000033192 | -1.61 | 1.07E-07 | Lipca2         | protein_coding | 5.47  | 5.66  | 5.61  | 5.31  | 4.66  | 4.04  | 3.35  | 3.17  |
| Down | ENSMUSG00000031972 | -1.45 | 1.08E-07 | Acta1          | protein_coding | 5.48  | 5.87  | 6.07  | 5.97  | 3.60  | 4.24  | 5.14  | 4.87  |
| Down | ENSMUSG00000028019 | -1.27 | 1.09E-07 | Pdgfc          | protein_coding | 5.95  | 6.31  | 6.08  | 5.96  | 5.20  | 4.64  | 4.27  | 5.36  |
| Down | ENSMUSG00000026321 | -1.09 | 1.11E-07 | Tnfrsf11a      | protein_coding | 5.48  | 5.36  | 5.34  | 5.30  | 4.72  | 4.35  | 4.30  | 4.31  |
| Down | ENSMUSG00000074364 | -1.89 | 1.16E-07 | Ehd2           | protein_coding | 4.39  | 4.64  | 4.75  | 4.67  | 2.77  | 3.77  | 3.59  | 2.70  |
| Down | ENSMUSG00000034258 | -2.19 | 1.22E-07 | Filvr2         | protein_coding | 4.07  | 4.37  | 4.24  | 4.39  | 2.47  | 2.53  | 2.86  | 3.44  |
| Down | ENSMUSG00000047832 | -1.11 | 1.22E-07 | Cdca4          | protein_coding | 5.04  | 5.40  | 5.40  | 5.34  | 4.22  | 4.32  | 4.57  | 4.28  |
| Down | ENSMUSG00000067081 | -1.53 | 1.24E-07 | Asb18          | protein_coding | 4.87  | 5.38  | 5.63  | 5.42  | 3.77  | 4.30  | 3.75  | 4.33  |
| Up   | ENSMUSG00000027371 | 1.03  | 1.28E-07 | Fahd2a         | protein_coding | 5.74  | 5.80  | 5.45  | 5.57  | 6.76  | 6.60  | 6.51  | 6.58  |
| Down | ENSMUSG00000073988 | -3.24 | 1.31E-07 | Ttpa           | protein_coding | 5.02  | 5.23  | 5.17  | 5.30  | 2.00  | 3.28  | 2.00  | 3.57  |
| Down | ENSMUSG00000030499 | -1.26 | 1.31E-07 | Kctd15         | protein_coding | 6.24  | 5.93  | 6.15  | 6.14  | 4.63  | 4.78  | 5.26  | 5.14  |
| Up   | ENSMUSG00000045036 | -2.38 | 1.39E-07 | Tmem232        | protein_coding | 4.47  | 5.14  | 5.04  | 5.09  | 4.02  | 2.62  | 3.53  | 3.52  |
| Down | ENSMUSG00000026475 | 1.53  | 1.47E-07 | Rgs16          | protein_coding | 5.45  | 5.21  | 5.35  | 5.22  | 7.22  | 6.47  | 6.82  | 6.32  |
| Down | ENSMUSG00000006430 | -2.38 | 1.47E-07 | Pde6h          | protein_coding | 4.51  | 5.53  | 4.85  | 5.57  | 3.65  | 3.45  | 3.45  | 3.45  |
| Down | ENSMUSG00000020695 | -1.68 | 1.50E-07 | Mrc2           | protein_coding | 5.10  | 4.91  | 5.15  | 5.16  | 3.73  | 3.65  | 3.13  | 4.23  |
| Down | ENSMUSG00000068154 | -1.57 | 1.51E-07 | Insm1          | protein_coding | 5.61  | 5.66  | 5.93  | 5.65  | 4.22  | 4.01  | 3.79  | 5.03  |
| Down | ENSMUSG00000005087 | -1.57 | 1.58E-07 | Cd44           | protein_coding | 5.80  | 6.56  | 5.46  | 6.08  | 4.49  | 4.47  | 4.30  | 5.10  |
| Down | ENSMUSG00000041135 | -1.33 | 1.58E-07 | Ripk2          | protein_coding | 5.98  | 6.33  | 6.33  | 5.61  | 5.62  | 4.16  | 5.36  | 4.48  |
| Down | ENSMUSG00000042672 | -1.09 | 1.61E-07 | Dcst1          | protein_coding | 6.18  | 6.36  | 6.10  | 6.16  | 5.30  | 4.85  | 4.99  | 5.56  |
| Down | ENSMUSG00000031871 | -2.03 | 1.73E-07 | Cdh5           | protein_coding | 4.57  | 5.55  | 4.95  | 5.22  | 3.35  | 3.22  | 3.30  | 4.05  |
| Down | ENSMUSG00000069892 | -2.37 | 1.81E-07 | 9930111J21Rik2 | protein_coding | 4.87  | 4.41  | 4.43  | 4.31  | 3.11  | 2.62  | 2.35  | 3.44  |
| Down | ENSMUSG00000001034 | -1.16 | 1.85E-07 | Mapk7          | protein_coding | 6.65  | 6.73  | 6.83  | 6.65  | 6.87  | 5.41  | 5.67  | 6.87  |
| Up   | ENSMUSG00000037846 | 1.06  | 1.88E-07 | Rtkn2          | protein_coding | 5.23  | 5.00  | 4.89  | 5.44  | 6.34  | 5.71  | 6.31  | 6.09  |
| Down | ENSMUSG00000014791 | -1.19 | 1.88E-07 | Elmo3          | protein_coding | 5.31  | 4.74  | 4.74  | 4.49  | 3.94  | 4.16  | 3.90  | 3.74  |
| Down | ENSMUSG00000006014 | -1.40 | 1.89E-07 | Prg4           | protein_coding | 5.34  | 5.91  | 5.02  | 5.35  | 4.47  | 4.44  | 3.79  | 4.17  |
| Down | ENSMUSG00000014813 | -2.23 | 1.91E-07 | Stc1           | protein_coding | 5.06  | 5.59  | 5.50  | 5.69  | 4.24  | 4.24  | 2.63  | 3.78  |
| Down | ENSMUSG00000036588 | -2.03 | 1.91E-07 | Calcr1         | protein_coding | 6.36  | 5.82  | 6.11  | 6.14  | 5.47  | 2.78  | 5.00  | 4.28  |
| Down | ENSMUSG00000038292 | -2.54 | 1.92E-07 | Ccdc155        | protein_coding | 3.31  | 4.09  | 4.52  | 3.69  | 2.67  | 2.62  | 2.71  | 2.62  |
| Down | ENSMUSG00000020059 | -1.45 | 1.97E-07 | Sycp3          | protein_coding | 5.36  | 5.90  | 5.24  | 5.81  | 3.85  | 4.54  | 4.40  | 4.48  |
| Down | ENSMUSG00000027355 | -2.42 | 2.01E-07 | Tmco5          | protein_coding | 4.54  | 4.74  | 4.82  | 4.50  | 3.45  | 2.34  | 3.00  | 2.99  |
| Down | ENSMUSG00000019982 | -2.07 | 2.01E-07 | Myb            | protein_coding | 5.36  | 4.89  | 4.43  | 5.27  | 2.74  | 3.38  | 3.35  | 3.99  |
| Down | ENSMUSG00000030370 | -1.59 | 2.02E-07 | Efna2          | protein_coding | 6.11  | 6.12  | 6.40  | 6.22  | 4.44  | 5.32  | 3.79  | 5.10  |
| Down | ENSMUSG00000074863 | -1.35 | 2.02E-07 | Platr25        | protein_coding | 5.74  | 6.33  | 6.09  | 6.13  | 4.06  | 5.20  | 4.71  | 5.18  |
| Down | ENSMUSG00000060477 | -1.17 | 2.06E-07 | Irak2          | protein_coding | 5.73  | 6.02  | 6.14  | 6.21  | 5.33  | 4.92  | 4.13  | 5.24  |
| Down | ENSMUSG00000022997 | -6.17 | 2.07E-07 | Wnt1           | protein_coding | 3.44  | 3.39  | 2.00  | 3.49  | 2.00  | 2.12  | 2.00  | 2.00  |
| Up   | ENSMUSG00000024190 | 1.07  | 2.09E-07 | Dusp1          | protein_coding | 6.12  | 6.71  | 6.04  | 6.62  | 7.07  | 7.81  | 7.69  | 7.02  |
| Down | ENSMUSG00000079436 | -3.66 | 2.09E-07 | Kcnj13         | protein_coding | 5.12  | 4.24  | 2.93  | 5.42  | 2.74  | 2.12  | 2.00  | 2.99  |
| Down | ENSMUSG00000050534 | -3.04 | 2.09E-07 | Htr5b          | protein_coding | 4.54  | 4.09  | 4.79  | 4.65  | 3.04  | 2.44  | 2.70  | 2.62  |
| Down | ENSMUSG00000028587 | -1.98 | 2.09E-07 | Orc1           | protein_coding | 4.15  | 4.64  | 4.78  | 4.85  | 2.47  | 2.78  | 3.45  | 3.66  |
| Down | ENSMUSG00000035153 | -2.44 | 2.10E-07 | Speg16         | protein_coding | 5.26  | 5.33  | 5.40  | 5.46  | 3.17  | 3.17  | 3.63  | 3.78  |
| Down | ENSMUSG00000047854 | -2.51 | 2.10E-07 | Six1           | protein_coding | 3.02  | 3.92  | 3.92  | 3.45  | 2.66  | 2.12  | 2.00  | 2.12  |
| Down | ENSMUSG00000021806 | -1.69 | 2.16E-07 | Nid2           | protein_coding | 4.70  | 4.67  | 5.19  | 4.87  | 3.81  | 3.05  | 3.07  | 4.05  |
| Up   | ENSMUSG00000018166 | 1.18  | 2.23E-07 | Erb3           | protein_coding | 6.46  | 6.10  | 6.46  | 6.29  | 7.99  | 6.67  | 7.53  | 7.42  |
| Down | ENSMUSG00000016028 | -1.36 | 2.23E-07 | Celsr1         | protein_coding | 5.98  | 5.92  | 5.77  | 6.33  | 4.70  | 5.31  | 3.79  | 4.71  |
| Down | ENSMUSG00000075014 | -3.27 | 2.24E-07 | Gm10800        | protein_coding | 15.91 | 16.39 | 16.10 | 16.71 | 12.44 | 13.31 | 11.99 | 13.77 |
| Up   | ENSMUSG00000053603 | 1.19  | 2.25E-07 | 4930442H23Rik  | protein_coding | 5.08  | 4.89  | 5.27  | 5.14  | 6.23  | 6.34  | 6.27  | 5.93  |
| Down | ENSMUSG00000022947 | -1.77 | 2.25E-07 | Cbr3           | protein_coding | 5.08  | 5.56  | 4.78  | 4.94  | 4.06  | 2.92  | 4.07  | 3.48  |
| Down | ENSMUSG00000040841 | -4.44 | 2.27E-07 | Six5           | protein_coding | 3.56  | 3.97  | 4.00  | 4.19  | 2.00  | 2.13  | 2.54  | 3.48  |
| Down | ENSMUSG00000091382 | -3.04 | 2.29E-07 | Vmn1r18        | protein_coding | 4.57  | 4.86  | 4.80  | 4.96  | 2.37  | 2.53  | 3.00  | 3.12  |
| Down | ENSMUSG00000029915 | -3.71 | 2.31E-07 | Clec5a         | protein_coding | 4.75  | 5.36  | 4.95  | 5.23  | 2.00  | 2.00  | 2.00  | 2.00  |
| Down | ENSMUSG00000043635 | -1.09 | 2.33E-07 | Adams3         | protein_coding | 6.92  | 6.85  | 7.09  | 6.87  | 6.25  | 4.85  | 6.37  | 5.64  |
| Down | ENSMUSG00000040163 | -4.09 | 2.41E-07 | 1700034J05Rik  | protein_coding | 3.67  | 3.83  | 3.60  | 3.60  | 2.37  | 2.00  | 2.13  | 2.08  |
| Down | ENSMUSG00000005364 | -3.11 | 2.44E-07 | Il6ra          | protein_coding | 4.03  | 3.68  | 3.23  | 3.94  | 2.25  | 2.12  | 2.24  | 2.70  |
| Down | ENSMUSG00000004626 | -1.10 | 2.45E-07 | Six2           | protein_coding | 5.94  | 5.77  | 6.02  | 5.90  | 4.56  | 5.16  | 4.67  | 5.47  |
| Down | ENSMUSG00000046731 | -2.79 | 2.4      |                |                |       |       |       |       |       |       |       |       |

|      |                      |       |          |               |                |       |       |       |       |       |       |       |       |
|------|----------------------|-------|----------|---------------|----------------|-------|-------|-------|-------|-------|-------|-------|-------|
| Down | ENSMUSG00000032403   | -1.06 | 2.60E-07 | 2300009A05Rik | protein_coding | 5.95  | 5.67  | 6.06  | 6.04  | 5.12  | 4.97  | 5.24  | 4.43  |
| Down | ENSMUSG00000025723   | -2.53 | 2.66E-07 | Nmb           | protein_coding | 3.44  | 3.88  | 3.75  | 4.09  | 2.37  | 2.85  | 2.00  | 2.70  |
| Down | ENSMUSG00000031803   | -6.50 | 2.68E-07 | B3gnt3        | protein_coding | 4.22  | 3.57  | 4.17  | 2.94  | 2.00  | 2.00  | 2.00  | 2.12  |
| Down | ENSMUSG00000003907   | -1.53 | 2.74E-07 | Cpq           | protein_coding | 5.06  | 5.02  | 4.89  | 5.62  | 3.81  | 3.84  | 4.10  | 3.92  |
| Down | ENSMUSG000000042195  | -2.68 | 2.81E-07 | Slc35f2       | protein_coding | 4.84  | 4.24  | 4.54  | 4.63  | 2.90  | 2.78  | 2.00  | 3.34  |
| Up   | ENSMUSG000000024228  | 1.22  | 2.83E-07 | Nudt12        | protein_coding | 5.21  | 4.93  | 5.26  | 5.65  | 6.55  | 6.40  | 6.43  | 6.29  |
| Down | ENSMUSG000000025491  | -3.75 | 2.89E-07 | Ifitm1        | protein_coding | 3.95  | 4.27  | 3.75  | 3.94  | 2.13  | 2.13  | 2.54  | 2.54  |
| Down | ENSMUSG000000028133  | -1.05 | 3.01E-07 | Raxtd3        | protein_coding | 5.92  | 6.20  | 6.30  | 6.12  | 4.84  | 5.05  | 5.19  | 5.52  |
| Up   | ENSMUSG000000056394  | 1.01  | 3.03E-07 | Lig1          | protein_coding | 5.95  | 5.84  | 5.83  | 6.38  | 7.05  | 6.99  | 7.06  | 6.83  |
| Down | ENSMUSG000000078640  | -4.92 | 3.20E-07 | Gm11627       | protein_coding | 3.61  | 4.01  | 4.13  | 3.86  | 2.13  | 2.00  | 2.00  | 2.34  |
| Down | ENSMUSG000000038583  | -1.99 | 3.39E-07 | Pln           | protein_coding | 4.07  | 4.31  | 3.49  | 4.25  | 2.82  | 3.05  | 2.13  | 3.17  |
| Down | ENSMUSG000000015468  | -1.42 | 3.42E-07 | Notch4        | protein_coding | 4.84  | 5.23  | 5.53  | 5.40  | 4.00  | 4.37  | 3.59  | 4.25  |
| Down | ENSMUSG000000029086  | -1.57 | 3.43E-07 | Prom1         | protein_coding | 5.57  | 5.92  | 5.42  | 5.58  | 4.94  | 3.52  | 3.79  | 4.43  |
| Up   | ENSMUSG000000057967  | 1.65  | 3.59E-07 | Fgf18         | protein_coding | 4.45  | 4.24  | 4.40  | 4.96  | 6.44  | 6.12  | 5.19  | 6.05  |
| Down | ENSMUSG000000053617  | -1.02 | 3.72E-07 | Sh3pxd2a      | protein_coding | 7.38  | 7.34  | 7.16  | 7.01  | 5.46  | 6.72  | 6.12  | 6.41  |
| Up   | ENSMUSG000000033585  | 1.33  | 3.78E-07 | Ndn           | protein_coding | 9.38  | 9.45  | 9.37  | 9.57  | 10.65 | 10.92 | 10.73 | 10.76 |
| Down | ENSMUSG000000049160  | -2.97 | 3.83E-07 | Tex50         | protein_coding | 3.95  | 3.46  | 3.75  | 3.39  | 2.00  | 2.70  | 2.00  | 2.54  |
| Down | ENSMUSG000000095280  | -3.21 | 3.85E-07 | Gm21738       | protein_coding | 12.73 | 13.21 | 12.90 | 13.52 | 2.00  | 10.18 | 8.86  | 10.69 |
| Down | ENSMUSG000000018899  | -2.09 | 3.94E-07 | Ifi1          | protein_coding | 5.36  | 5.36  | 5.31  | 5.16  | 3.35  | 2.78  | 4.00  | 4.02  |
| Up   | ENSMUSG000000086438  | 1.33  | 4.05E-07 | Plekhf1       | protein_coding | 5.45  | 4.84  | 5.24  | 6.41  | 6.60  | 5.81  | 6.50  | 6.50  |
| Up   | ENSMUSG000000079694  | 1.39  | 4.07E-07 | Gm14862       | protein_coding | 3.38  | 3.03  | 4.17  | 3.50  | 5.22  | 5.39  | 5.58  | 5.58  |
| Down | ENSMUSG00000000167   | -2.46 | 4.09E-07 | Plh1d2        | protein_coding | 4.65  | 5.00  | 4.46  | 4.48  | 3.45  | 3.22  | 2.35  | 2.62  |
| Down | ENSMUSG000000031255  | -3.39 | 4.20E-07 | Sytl4         | protein_coding | 4.67  | 4.27  | 4.78  | 4.96  | 2.13  | 2.44  | 3.00  | 2.70  |
| Down | ENSMUSG000000045275  | -1.64 | 4.23E-07 | Lca5l         | protein_coding | 4.89  | 5.19  | 5.60  | 4.91  | 3.11  | 3.28  | 4.40  | 4.14  |
| Up   | ENSMUSG000000034161  | 1.89  | 4.26E-07 | Scx           | protein_coding | 3.02  | 3.63  | 3.36  | 3.98  | 4.54  | 4.66  | 5.36  | 5.32  |
| Down | ENSMUSG000000033486  | -1.40 | 4.41E-07 | Catsper2      | protein_coding | 4.98  | 4.64  | 4.57  | 4.89  | 3.60  | 3.38  | 3.94  | 3.78  |
| Down | ENSMUSG000000032942  | -2.86 | 4.44E-07 | Ucp3          | protein_coding | 4.18  | 4.44  | 4.46  | 4.67  | 2.62  | 2.79  | 2.92  | 2.92  |
| Down | ENSMUSG000000030074  | -1.50 | 4.45E-07 | Gxyl2         | protein_coding | 5.58  | 5.06  | 5.48  | 5.42  | 4.78  | 4.13  | 3.59  | 3.70  |
| Down | ENSMUSG000000032596  | -2.60 | 4.46E-07 | Uba7          | protein_coding | 4.29  | 4.05  | 4.65  | 4.25  | 2.37  | 2.53  | 3.13  | 2.78  |
| Up   | ENSMUSG000000028680  | 1.04  | 4.63E-07 | Plk3          | protein_coding | 5.55  | 6.15  | 5.85  | 5.46  | 6.56  | 7.17  | 6.59  | 6.64  |
| Down | ENSMUSG000000008307  | -1.30 | 4.64E-07 | 1700109H08Rik | protein_coding | 4.67  | 5.02  | 4.93  | 5.52  | 4.24  | 4.17  | 3.45  | 4.28  |
| Down | ENSMUSG000000034871  | -1.39 | 4.66E-07 | Fam151a       | protein_coding | 6.26  | 6.57  | 5.99  | 5.82  | 4.99  | 5.44  | 4.63  | 4.41  |
| Down | ENSMUSG000000040258  | -3.05 | 4.70E-07 | Nxph4         | protein_coding | 4.75  | 4.47  | 4.43  | 4.37  | 2.00  | 2.62  | 2.00  | 2.62  |
| Down | ENSMUSG000000040166  | -1.32 | 4.59E-07 | Nmem1         | protein_coding | 5.66  | 5.46  | 5.65  | 5.52  | 4.39  | 4.30  | 3.97  | 4.83  |
| Down | ENSMUSG000000006705  | -1.02 | 4.95E-07 | Pknox1        | protein_coding | 6.76  | 7.03  | 6.56  | 6.60  | 5.40  | 6.04  | 5.31  | 6.17  |
| Up   | ENSMUSG000000040472  | 1.05  | 4.96E-07 | Rabgga1       | protein_coding | 6.44  | 6.61  | 6.57  | 6.21  | 7.73  | 7.19  | 7.84  | 7.01  |
| Down | ENSMUSG000000042225  | -2.08 | 5.02E-07 | Ammecr1       | protein_coding | 4.54  | 4.84  | 5.24  | 5.42  | 3.04  | 3.43  | 2.13  | 4.33  |
| Down | ENSMUSG000000031953  | -1.58 | 5.14E-07 | Tmem170       | protein_coding | 5.51  | 5.26  | 5.63  | 5.63  | 3.64  | 3.80  | 4.19  | 4.79  |
| Down | ENSMUSG000000021615  | -1.31 | 5.15E-07 | Xrcc4         | protein_coding | 6.43  | 6.45  | 6.26  | 6.44  | 5.68  | 5.14  | 4.92  | 4.83  |
| Down | ENSMUSG000000033147  | -1.24 | 5.24E-07 | Slc22a15      | protein_coding | 6.33  | 6.42  | 6.78  | 6.20  | 4.66  | 5.11  | 5.07  | 5.98  |
| Down | ENSMUSG000000038932  | -4.11 | 5.34E-07 | Tcf8          | protein_coding | 3.61  | 3.63  | 3.54  | 3.50  | 2.00  | 2.00  | 2.13  | 2.44  |
| Down | ENSMUSG000000013766  | -3.00 | 5.34E-07 | Ly6g6e        | protein_coding | 4.51  | 4.47  | 4.55  | 4.74  | 2.00  | 3.43  | 2.00  | 2.44  |
| Down | ENSMUSG000000043008  | -2.71 | 5.55E-07 | Klhl6         | protein_coding | 3.56  | 4.31  | 3.93  | 4.60  | 2.74  | 2.62  | 2.35  | 2.70  |
| Down | ENSMUSG000000037010  | -1.70 | 5.55E-07 | Apln          | protein_coding | 6.59  | 6.79  | 6.88  | 6.68  | 5.47  | 3.98  | 5.08  | 5.59  |
| Down | ENSMUSG000000031586  | -1.75 | 5.69E-07 | Rbpms         | protein_coding | 4.95  | 4.47  | 5.02  | 4.76  | 3.73  | 3.87  | 3.53  | 3.53  |
| Down | ENSMUSG000000043687  | -1.49 | 5.82E-07 | 1190005I06Rik | protein_coding | 5.88  | 5.43  | 5.26  | 5.52  | 3.73  | 3.84  | 4.61  | 4.61  |
| Down | ENSMUSG000000078496  | -3.69 | 5.90E-07 | Zfp982        | protein_coding | 2.94  | 3.52  | 3.54  | 4.76  | 2.00  | 2.54  | 2.00  | 2.54  |
| Up   | ENSMUSG000000031813  | 1.15  | 5.91E-07 | Mvb12a        | protein_coding | 5.21  | 5.88  | 6.03  | 5.76  | 6.68  | 6.24  | 7.36  | 6.85  |
| Down | ENSMUSG000000062563  | -1.13 | 5.91E-07 | Cys1          | protein_coding | 6.34  | 6.19  | 6.23  | 6.38  | 5.77  | 4.80  | 4.81  | 5.37  |
| Down | ENSMUSG000000026726  | -1.55 | 6.01E-07 | Cubn          | protein_coding | 5.50  | 5.63  | 5.88  | 5.79  | 3.89  | 4.68  | 3.67  | 4.83  |
| Down | ENSMUSG000000043753  | -6.45 | 6.04E-07 | Dmrt1         | protein_coding | 3.61  | 3.78  | 3.65  | 4.02  | 2.13  | 2.00  | 2.00  | 2.00  |
| Down | ENSMUSG000000021998  | -1.38 | 6.09E-07 | Lcp1          | protein_coding | 5.82  | 6.08  | 5.65  | 5.64  | 4.74  | 4.13  | 4.57  | 4.81  |
| Down | ENSMUSG000000063275  | -1.56 | 6.21E-07 | Hacd1         | protein_coding | 6.07  | 5.83  | 5.85  | 6.05  | 3.35  | 4.80  | 4.87  | 4.77  |
| Down | ENSMUSG000000028989  | -2.11 | 6.39E-07 | Angptl7       | protein_coding | 3.31  | 4.09  | 4.13  | 4.09  | 2.47  | 3.28  | 2.79  | 2.12  |
| Down | ENSMUSG000000100846  | -1.61 | 6.56E-07 | Gm28845       | protein_coding | 4.54  | 5.40  | 5.31  | 5.24  | 3.98  | 3.50  | 3.20  | 3.50  |
| Down | ENSMUSG000000008999  | -1.74 | 6.69E-07 | Bmp7          | protein_coding | 5.65  | 5.87  | 5.56  | 6.37  | 5.04  | 4.07  | 3.50  | 4.46  |
| Down | ENSMUSG000000051590  | -1.43 | 6.75E-07 | Map3k19       | protein_coding | 6.17  | 5.97  | 5.69  | 5.76  | 5.11  | 3.75  | 4.66  | 4.66  |
| Down | ENSMUSG000000070034  | -1.99 | 6.89E-07 | Sp110         | protein_coding | 4.26  | 5.02  | 5.31  | 3.64  | 3.11  | 3.50  | 3.44  | 3.44  |
| Down | ENSMUSG000000036923  | -1.83 | 7.25E-07 | Stox1         | protein_coding | 4.98  | 5.30  | 4.54  | 4.94  | 3.64  | 3.33  | 3.83  | 3.78  |
| Down | ENSMUSG000000052133  | -1.55 | 7.39E-07 | Sema5b        | protein_coding | 6.40  | 5.88  | 6.23  | 5.89  | 5.38  | 3.17  | 4.77  | 4.79  |
| Down | ENSMUSG000000049811  | -1.22 | 7.41E-07 | Fam151a       | protein_coding | 5.91  | 5.50  | 5.35  | 5.92  | 4.36  | 4.56  | 5.02  | 4.43  |
| Down | ENSMUSG000000001134  | -1.35 | 7.43E-07 | Uxt           | protein_coding | 6.80  | 6.33  | 6.75  | 6.21  | 4.10  | 5.83  | 5.29  | 5.29  |
| Down | ENSMUSG000000041679  | -1.88 | 7.46E-07 | Lrrc29        | protein_coding | 4.22  | 3.63  | 4.70  | 4.09  | 2.82  | 2.62  | 2.93  | 3.44  |
| Down | ENSMUSG000000036111  | -2.30 | 7.69E-07 | Lmo1          | protein_coding | 7.08  | 7.10  | 7.11  | 7.14  | 5.14  | 5.28  | 2.71  | 5.47  |
| Down | ENSMUSG000000029070  | -2.34 | 7.72E-07 | Mxra8         | protein_coding | 5.12  | 4.44  | 5.40  | 4.85  | 3.17  | 2.98  | 2.79  | 3.81  |
| Down | ENSMUSG000000034028  | -2.73 | 7.96E-07 | Cd226         | protein_coding | 3.77  | 4.09  | 4.37  | 4.19  | 2.66  | 2.92  | 2.00  | 2.62  |
| Down | ENSMUSG000000042473  | -1.04 | 8.08E-07 | Tbc1d8b       | protein_coding | 6.53  | 6.67  | 6.48  | 6.58  | 5.94  | 5.81  | 5.19  | 5.28  |
| Down | ENSMUSG000000023224  | -2.03 | 8.25E-07 | Serpinc1      | protein_coding | 4.89  | 4.74  | 4.63  | 5.16  | 3.61  | 3.19  | 2.44  | 2.44  |
| Down | ENSMUSG000000035778  | -2.35 | 8.27E-07 | Ggta1         | protein_coding | 4.80  | 4.95  | 5.05  | 4.94  | 2.00  | 3.91  | 3.35  | 2.92  |
| Down | ENSMUSG000000082932  | -5.11 | 8.38E-07 | Cyp2j8        | protein_coding | 3.50  | 4.20  | 4.46  | 3.86  | 2.24  | 2.00  | 2.24  | 2.00  |
| Down | ENSMUSG000000040364  | -2.66 | 8.45E-07 | Sec1          | protein_coding | 4.36  | 4.31  | 4.09  | 4.09  | 3.11  | 2.00  | 2.63  | 2.85  |
| Down | ENSMUSG000000010142  | -2.93 | 8.47E-07 | Tnfrsf13b     | protein_coding | 4.67  | 4.13  | 4.09  | 4.15  | 2.90  | 2.62  | 2.00  | 2.70  |
| Down | ENSMUSG000000023558  | -2.31 | 8.54E-07 | Cdk2          | protein_coding | 4.54  | 4.47  | 4.13  | 4.31  | 2.62  | 2.62  | 3.00  | 3.23  |
| Down | ENSMUSG000000027554  | -1.25 | 8.79E-07 | Slc8b1        | protein_coding | 4.62  | 4.77  | 4.67  | 4.67  | 3.97  | 3.97  | 3.19  | 3.57  |
| Down | ENSMUSG0000000070871 | -1.06 | 8.85E-07 | Ccny1         | protein_coding | 5.94  | 6.63  | 6.55  | 6.62  | 4.80  | 5.90  | 5.29  | 5.65  |
| Down | ENSMUSG000000037406  | -2.15 | 9.24E-07 | Htra4         | protein_coding | 4.07  | 4.97  | 5.22  | 4.85  | 3.50  | 2.70  | 3.54  | 3.12  |
| Down | ENSMUSG000000004837  | -3.76 | 9.31E-07 | Grap          | protein_coding | 2.85  | 3.97  | 4.34  | 4.15  | 2.47  | 2.00  | 2.45  | 2.12  |
| Down | ENSMUSG000000091183  | -1.29 | 9.40E-07 | Gm5141        | protein_coding | 5.04  | 5.70  | 5.37  | 5.55  | 4.56  | 4.64  | 3.45  | 4.36  |
| Down | ENSMUSG000000024037  | -2.09 | 9.52E-07 | Wdr4          | protein_coding | 4.51  | 4.64  | 4.70  | 4.94  | 2.25  | 2.44  | 3.83  | 3.62  |
| Down | ENSMUSG000000032649  | -1.18 | 9.55E-07 | Colgalt2      | protein_coding | 5.15  | 5.25  | 5.37  | 5.31  | 4.47  | 4.01  | 4.19  | 4.38  |
| Down | ENSMUSG000000036169  | -2.25 | 9.67E-07 | Sostdc1       | protein_coding | 5.65  | 4.13  | 4.24  | 5.94  | 3.61  | 3.50  | 2.93  | 3.66  |
| Down | ENSMUSG000000027967  | -5.93 | 9.68E-07 | Neurog2       | protein_coding | 3.02  | 3.19  | 3.93  | 3.39  | 2.00  | 2.12  | 2.00  | 2.00  |
| Down | ENSMUSG000000022288  | -3.06 | 9.83E-07 | 4930447A16Rik | protein_coding | 3.10  | 3.39  | 3.80  | 2.00  | 2.24  | 2.34  | 2.35  | 2.44  |
| Up   | ENSMUSG000000009731  | 1.01  | 1.04E-06 | Kcnd1         | protein_coding | 5.82  | 6.01  | 5.86  | 6.02  | 7.12  | 7.03  | 6.73  | 6.62  |
| Down | ENSMUSG000000030562  | -4.76 | 1.04E-06 | Nox4          | protein_coding | 4.62  | 4.20  | 4.52  | 4.87  | 2.25  | 2.00  | 2.00  | 2.62  |
| Down | ENSMUSG000000039005  | -3.44 | 1.06E-06 | Tlr4          | protein_coding | 4.54  | 4.13  | 5.00  | 4.89  | 2.25  | 2.90  | 2.00  | 2.92  |
| Down | ENSMUSG000000049156  | -2.52 | 1.07E-06 | Gm14589       | protein_c      |       |       |       |       |       |       |       |       |

|                    |                    |          |          |                |                |       |       |       |       |      |      |      |       |
|--------------------|--------------------|----------|----------|----------------|----------------|-------|-------|-------|-------|------|------|------|-------|
| Down               | ENSMUSG00000015533 | -2.51    | 1.17E-06 | Itga2          | protein_coding | 4.45  | 4.69  | 4.46  | 4.91  | 3.29 | 2.44 | 2.13 | 3.48  |
| Down               | ENSMUSG00000048779 | -3.25    | 1.20E-06 | P2ry6          | protein_coding | 4.95  | 4.84  | 4.30  | 3.98  | 2.00 | 2.98 | 2.35 | 2.85  |
| Down               | ENSMUSG00000104301 | -2.35    | 1.22E-06 | Wdr49          | protein_coding | 5.76  | 5.59  | 5.24  | 5.49  | 3.35 | 4.24 | 3.20 | 3.23  |
| Down               | ENSMUSG00000042626 | -1.43    | 1.22E-06 | Shc1           | protein_coding | 5.47  | 6.00  | 6.21  | 5.92  | 4.68 | 3.52 | 5.22 | 4.72  |
| Down               | ENSMUSG00000075015 | -3.51    | 1.25E-06 | Gm10801        | protein_coding | 12.89 | 13.30 | 13.05 | 13.58 | 9.10 | 9.99 | 8.81 | 10.44 |
| Up                 | ENSMUSG00000022571 | 1.03     | 1.28E-06 | Pycr1          | protein_coding | 5.65  | 5.66  | 5.53  | 5.70  | 6.91 | 6.80 | 6.04 | 6.50  |
| Down               | ENSMUSG00000078137 | -1.87    | 1.28E-06 | Ankrd63        | protein_coding | 7.05  | 7.16  | 6.74  | 7.18  | 4.03 | 6.03 | 4.35 | 5.75  |
| Down               | ENSMUSG00000021848 | -3.12    | 1.32E-06 | Otx2           | protein_coding | 5.92  | 4.58  | 3.60  | 6.09  | 3.81 | 2.00 | 2.79 | 3.06  |
| Down               | ENSMUSG00000035429 | -2.37    | 1.32E-06 | Ptprh          | protein_coding | 3.61  | 4.31  | 4.40  | 4.28  | 2.57 | 2.92 | 2.71 | 2.78  |
| Down               | ENSMUSG00000070371 | -1.32    | 1.33E-06 | Prss36         | protein_coding | 4.91  | 5.02  | 5.70  | 5.16  | 3.55 | 4.32 | 4.16 | 4.33  |
| Down               | ENSMUSG00000050666 | -1.62    | 1.38E-06 | Vstm4          | protein_coding | 4.54  | 5.25  | 4.85  | 4.67  | 3.73 | 3.98 | 3.07 | 3.44  |
| Down               | ENSMUSG00000035397 | -1.27    | 1.38E-06 | Klf16          | protein_coding | 7.64  | 7.61  | 7.80  | 7.69  | 5.38 | 5.98 | 7.06 | 6.81  |
| Down               | ENSMUSG00000059412 | -1.54    | 1.41E-06 | Fxyd2          | protein_coding | 4.51  | 5.10  | 5.45  | 5.04  | 3.64 | 3.98 | 3.13 | 4.28  |
| Down               | ENSMUSG00000022978 | -1.41    | 1.41E-06 | Mis18a         | protein_coding | 5.44  | 5.63  | 5.87  | 5.48  | 4.63 | 4.30 | 4.19 | 4.41  |
| Down               | ENSMUSG00000061119 | -1.01    | 1.42E-06 | Prpc           | protein_coding | 5.70  | 5.64  | 5.65  | 5.77  | 4.94 | 4.58 | 4.43 | 5.14  |
| Down               | ENSMUSG00000031445 | -1.02    | 1.43E-06 | Proz           | protein_coding | 6.09  | 6.42  | 5.97  | 5.96  | 4.90 | 5.44 | 5.10 | 5.25  |
| Down               | ENSMUSG00000046470 | -2.28    | 1.47E-06 | Sox18          | protein_coding | 4.26  | 3.97  | 3.93  | 4.12  | 2.25 | 3.17 | 2.71 | 2.62  |
| Down               | ENSMUSG00000090122 | -2.63    | 1.50E-06 | Kcne11         | protein_coding | 4.07  | 4.44  | 4.17  | 4.22  | 2.24 | 2.24 | 2.93 | 2.78  |
| Up                 | ENSMUSG00000041842 | 1.25     | 1.53E-06 | Fhdcl1         | protein_coding | 5.73  | 5.17  | 5.40  | 5.59  | 6.45 | 6.18 | 7.19 | 6.63  |
| Down               | ENSMUSG00000047161 | -1.85    | 1.54E-06 | Chs9           | protein_coding | 5.17  | 4.84  | 5.45  | 5.09  | 3.64 | 4.19 | 3.19 | 3.48  |
| Down               | ENSMUSG00000032492 | -1.51    | 1.54E-06 | Ptfr1          | protein_coding | 5.02  | 4.93  | 5.57  | 5.38  | 3.96 | 3.98 | 3.79 | 4.23  |
| Down               | ENSMUSG00000046688 | -1.22    | 1.55E-06 | Tifa           | protein_coding | 5.42  | 5.12  | 5.43  | 5.65  | 4.10 | 4.60 | 4.54 | 4.17  |
| Down               | ENSMUSG00000031486 | -1.07    | 1.55E-06 | Adgra2         | protein_coding | 6.06  | 6.11  | 6.28  | 6.21  | 4.78 | 5.72 | 4.88 | 5.11  |
| Up                 | ENSMUSG00000030089 | 1.63     | 1.58E-06 | Sic41a3        | protein_coding | 4.03  | 3.78  | 4.57  | 3.82  | 5.71 | 4.97 | 5.30 | 5.76  |
| Down               | ENSMUSG00000032415 | -1.56    | 1.59E-06 | Ube2cbp        | protein_coding | 5.70  | 5.10  | 4.82  | 5.19  | 3.64 | 4.27 | 3.59 | 4.17  |
| Down               | ENSMUSG00000028553 | -2.53    | 1.60E-06 | Angptl3        | protein_coding | 3.99  | 4.17  | 3.65  | 4.19  | 2.66 | 2.00 | 2.00 | 3.34  |
| Up                 | ENSMUSG00000031603 | 1.30     | 1.61E-06 | Fgf20          | protein_coding | 5.92  | 5.76  | 5.57  | 5.72  | 6.98 | 7.14 | 7.12 | 7.12  |
| Down               | ENSMUSG00000020633 | -3.47    | 1.64E-06 | Dcdc2c         | protein_coding | 4.18  | 3.57  | 3.89  | 3.94  | 2.00 | 2.44 | 2.00 | 2.00  |
| Down               | ENSMUSG00000029802 | -1.21    | 1.66E-06 | Abcg2          | protein_coding | 5.82  | 6.21  | 6.26  | 5.82  | 4.56 | 5.10 | 5.05 | 5.70  |
| Down               | ENSMUSG00000095186 | -3.36    | 1.67E-06 | Gm10718        | protein_coding | 10.58 | 11.05 | 10.76 | 11.29 | 6.77 | 7.89 | 6.86 | 8.34  |
| Down               | ENSMUSG00000044162 | -2.75    | 1.74E-06 | Tnip3          | protein_coding | 3.91  | 4.44  | 4.34  | 5.04  | 2.70 | 5.04 | 2.70 | 2.63  |
| Down               | ENSMUSG00000019850 | -1.30    | 1.76E-06 | Tnfrap3        | protein_coding | 5.44  | 5.78  | 5.68  | 5.82  | 5.19 | 3.84 | 4.59 | 4.23  |
| Down               | ENSMUSG00000022666 | -1.75    | 1.79E-06 | Bax2           | protein_coding | 5.08  | 4.89  | 4.89  | 5.14  | 4.00 | 2.62 | 3.02 | 3.62  |
| Down               | ENSMUSG00000053004 | -1.43    | 1.80E-06 | Hrh1           | protein_coding | 4.65  | 5.55  | 4.89  | 4.48  | 4.31 | 4.24 | 4.24 | 4.25  |
| Down               | ENSMUSG00000046714 | -4.93    | 1.81E-06 | Foxc2          | protein_coding | 2.94  | 3.33  | 3.70  | 4.22  | 2.00 | 2.00 | 2.00 | 2.34  |
| Down               | ENSMUSG00000096966 | -1.70    | 1.84E-06 | Zfp960         | protein_coding | 4.03  | 4.31  | 4.24  | 4.28  | 3.17 | 3.22 | 2.93 | 2.99  |
| Down               | ENSMUSG00000027997 | -1.46    | 1.92E-06 | Casp6          | protein_coding | 4.77  | 4.27  | 4.09  | 4.63  | 3.11 | 3.47 | 3.24 | 3.70  |
| Up                 | ENSMUSG00000022887 | 1.34     | 1.94E-06 | Masp1          | protein_coding | 6.30  | 6.08  | 6.22  | 6.27  | 7.71 | 7.26 | 7.68 | 7.34  |
| Down               | ENSMUSG00000034320 | -1.03    | 1.94E-06 | Sic26a2        | protein_coding | 6.58  | 6.85  | 7.12  | 6.93  | 5.23 | 6.37 | 5.49 | 6.20  |
| Up                 | ENSMUSG00000034936 | 1.11     | 1.97E-06 | Arl4d          | protein_coding | 5.81  | 5.77  | 5.59  | 5.48  | 6.89 | 6.12 | 6.89 | 6.79  |
| Up                 | ENSMUSG00000070717 | 1.37     | 1.98E-06 | Gm10300        | protein_coding | 3.86  | 4.13  | 3.93  | 3.69  | 5.34 | 4.42 | 5.22 | 4.95  |
| Down               | ENSMUSG00000029343 | -2.52    | 1.99E-06 | Crybb1         | protein_coding | 4.67  | 3.88  | 4.13  | 4.22  | 3.22 | 3.22 | 2.92 | 2.92  |
| Down               | ENSMUSG00000030946 | -1.27    | 2.00E-06 | Lhpp           | protein_coding | 5.83  | 5.81  | 6.22  | 6.38  | 5.07 | 4.70 | 4.13 | 5.49  |
| Down               | ENSMUSG00000019851 | -2.68    | 2.02E-06 | Perp           | protein_coding | 5.15  | 4.20  | 4.49  | 3.55  | 2.92 | 2.00 | 2.99 | 2.99  |
| Down               | ENSMUSG00000043566 | -1.80    | 2.06E-06 | Fbx7           | protein_coding | 5.08  | 5.23  | 5.29  | 5.49  | 3.47 | 3.43 | 3.97 | 4.36  |
| Down               | ENSMUSG00000039450 | -2.02    | 2.10E-06 | Dcxr           | protein_coding | 4.89  | 4.44  | 4.57  | 4.82  | 3.11 | 2.62 | 3.24 | 3.74  |
| Down               | ENSMUSG00000059350 | -3.00    | 2.10E-06 | Gpr18          | protein_coding | 3.19  | 3.31  | 3.30  | 3.30  | 2.70 | 2.00 | 2.00 | 2.00  |
| Down               | ENSMUSG00000040740 | -2.99    | 2.21E-06 | Sic25a34       | protein_coding | 4.87  | 4.61  | 4.34  | 3.90  | 2.25 | 2.42 | 3.40 | 2.44  |
| Down               | ENSMUSG00000016942 | -2.51    | 2.22E-06 | Trmss6         | protein_coding | 4.77  | 4.34  | 4.80  | 3.60  | 2.82 | 2.00 | 2.00 | 3.12  |
| Down               | ENSMUSG00000031374 | -1.36    | 2.26E-06 | Zfp92          | protein_coding | 5.04  | 4.95  | 5.37  | 5.69  | 3.96 | 4.13 | 3.59 | 4.68  |
| Down               | ENSMUSG00000004730 | -2.25    | 2.29E-06 | Adgre1         | protein_coding | 5.10  | 4.84  | 5.00  | 5.12  | 2.22 | 3.77 | 2.79 | 3.78  |
| Down               | ENSMUSG00000057098 | -1.97    | 2.37E-06 | Ebf1           | protein_coding | 4.82  | 5.04  | 4.82  | 5.27  | 3.04 | 4.35 | 2.35 | 3.44  |
| Down               | ENSMUSG00000038843 | -2.43    | 2.38E-06 | Gcnt1          | protein_coding | 5.45  | 5.28  | 5.24  | 5.65  | 3.40 | 4.16 | 2.00 | 3.62  |
| Down               | ENSMUSG00000059898 | -1.75    | 2.43E-06 | Dsc3           | protein_coding | 5.66  | 5.70  | 5.38  | 5.89  | 4.06 | 3.69 | 3.50 | 4.95  |
| Down               | ENSMUSG00000020912 | -1.14    | 2.43E-06 | Krt12          | protein_coding | 6.04  | 5.50  | 6.09  | 6.56  | 4.44 | 5.49 | 5.49 | 5.38  |
| Down               | ENSMUSG00000038859 | -2.18    | 2.46E-06 | Baiap21        | protein_coding | 4.67  | 3.83  | 3.49  | 4.65  | 2.97 | 2.00 | 3.54 | 2.54  |
| Down               | ENSMUSG00000022665 | -1.31    | 2.48E-06 | Ccdc80         | protein_coding | 4.75  | 5.12  | 5.35  | 4.03  | 3.94 | 4.04 | 4.23 | 4.31  |
| Up                 | ENSMUSG00000039699 | 1.03     | 2.51E-06 | Batf2          | protein_coding | 4.95  | 5.44  | 5.43  | 5.42  | 6.51 | 6.14 | 6.31 | 6.15  |
| ENSMUSG00000070469 | -1.46              | 2.51E-06 | Adamts13 | protein_coding | 4.84           | 5.22  | 5.22  | 5.16  | 4.22  | 4.10 | 3.62 | 3.63 | 3.62  |
| Up                 | ENSMUSG00000045929 | 1.06     | 2.54E-06 | Gm20715        | protein_coding | 5.34  | 5.28  | 5.40  | 5.12  | 6.13 | 5.89 | 6.40 | 6.56  |
| Up                 | ENSMUSG00000043648 | 2.32     | 2.62E-06 | Pt66           | protein_coding | 2.43  | 2.66  | 3.01  | 3.01  | 4.68 | 4.35 | 3.67 | 4.08  |
| Down               | ENSMUSG00000038402 | -2.71    | 2.62E-06 | Foxf2          | protein_coding | 3.72  | 3.88  | 3.89  | 4.22  | 2.25 | 3.11 | 2.24 | 2.24  |
| Down               | ENSMUSG00000048310 | -1.10    | 2.62E-06 | Pskh1          | protein_coding | 6.13  | 6.00  | 6.02  | 5.79  | 4.94 | 4.35 | 4.88 | 5.54  |
| Down               | ENSMUSG00000056220 | -1.85    | 2.71E-06 | Pla2g4a        | protein_coding | 5.17  | 5.47  | 4.87  | 4.94  | 2.97 | 3.28 | 3.35 | 4.50  |
| Down               | ENSMUSG00000020077 | -2.63    | 2.74E-06 | Srgn           | protein_coding | 4.29  | 4.69  | 4.82  | 4.45  | 3.11 | 2.53 | 2.00 | 3.39  |
| Down               | ENSMUSG00000079484 | -1.10    | 2.74E-06 | Ptyhd1         | protein_coding | 5.58  | 5.89  | 5.22  | 5.69  | 4.25 | 4.90 | 4.35 | 4.93  |
| Down               | ENSMUSG00000020799 | -3.02    | 2.76E-06 | Tekt1          | protein_coding | 4.80  | 4.77  | 3.84  | 5.53  | 2.37 | 3.43 | 2.00 | 3.06  |
| Down               | ENSMUSG00000041653 | -1.36    | 2.78E-06 | Pnpla3         | protein_coding | 4.80  | 5.00  | 5.02  | 4.76  | 3.73 | 3.94 | 3.75 | 3.81  |
| Down               | ENSMUSG00000017756 | -1.64    | 2.81E-06 | Sic12a7        | protein_coding | 5.17  | 5.59  | 5.09  | 5.30  | 3.73 | 3.52 | 3.94 | 4.41  |
| Down               | ENSMUSG00000007655 | -2.26    | 2.82E-06 | Cav1           | protein_coding | 4.07  | 4.64  | 5.09  | 5.50  | 3.55 | 2.24 | 3.19 | 3.66  |
| Down               | ENSMUSG00000039480 | -1.75    | 2.82E-06 | Ni5dc1         | protein_coding | 4.22  | 4.31  | 4.70  | 5.27  | 2.70 | 2.70 | 3.24 | 4.05  |
| Down               | ENSMUSG00000030332 | -2.11    | 2.89E-06 | Klf4           | protein_coding | 4.91  | 4.34  | 5.37  | 4.53  | 2.00 | 3.52 | 3.45 | 3.62  |
| Down               | ENSMUSG00000078507 | -6.53    | 2.90E-06 | Aeadac3        | protein_coding | 4.11  | 3.69  | 3.60  | 3.90  | 2.13 | 2.00 | 2.00 | 2.00  |
| Down               | ENSMUSG00000006628 | -1.21    | 2.91E-06 | Hk1            | protein_coding | 5.44  | 5.49  | 5.52  | 4.61  | 4.61 | 4.92 | 3.90 | 4.92  |
| Down               | ENSMUSG00000033880 | -1.18    | 2.91E-06 | Lgals3bp       | protein_coding | 5.38  | 5.50  | 5.24  | 5.33  | 4.44 | 4.32 | 4.19 | 4.43  |
| Down               | ENSMUSG00000021640 | -3.22    | 2.96E-06 | Naip1          | protein_coding | 4.03  | 4.01  | 3.65  | 3.90  | 2.00 | 2.44 | 2.24 | 2.70  |
| Down               | ENSMUSG00000073412 | -3.28    | 3.12E-06 | Lst1           | protein_coding | 3.25  | 3.68  | 3.09  | 3.33  | 2.00 | 2.00 | 2.35 | 2.44  |
| Down               | ENSMUSG00000034732 | -1.22    | 3.15E-06 | Pabpc5         | protein_coding | 5.38  | 5.04  | 5.24  | 5.37  | 4.16 | 4.22 | 3.87 | 4.57  |
| Down               | ENSMUSG00000030921 | -2.56    | 3.18E-06 | Trim30a        | protein_coding | 4.07  | 4.13  | 4.68  | 4.65  | 2.90 | 3.17 | 2.24 | 2.70  |
| Down               | ENSMUSG00000028919 | -1.33    | 3.19E-06 | Arhgef19       | protein_coding | 5.66  | 4.89  | 5.89  | 5.30  | 4.47 | 4.46 | 4.63 | 5.66  |
| Down               | ENSMUSG00000030737 | -1.06    | 3.22E-06 | Sicc2b1        | protein_coding | 6.53  | 5.97  | 6.49  | 6.03  | 5.34 | 5.42 | 5.43 | 6.43  |
| Down               | ENSMUSG00000039081 | -1.92    | 3.23E-06 | Zfp503         | protein_coding | 4.89  | 5.43  | 4.80  | 5.00  | 3.73 | 3.33 | 2.45 | 4.17  |
| Down               | ENSMUSG00000052821 | -3.55    | 3.32E-06 | Cysltr1        | protein_coding | 4.29  | 4.09  | 3.23  | 4.05  | 2.00 | 2.62 | 2.00 | 2.54  |
| Down               | ENSMUSG00000036867 | -2.69    | 3.32E-06 | Smad6          | protein_coding | 3.61  | 3.83  | 3.36  | 3.86  | 2.13 | 2.53 | 2.00 | 2.85  |
| Down               | ENSMUSG00000036086 | -1.07    | 3.32E-06 | Zranb3         | protein_coding | 6.43  | 6.14  | 6.70  | 6.48  | 5.19 | 5.77 | 5.05 | 5.68  |
| Up                 | ENSMUSG00000020090 | 1.54     | 3.41E-06 | Npflr1         | protein_coding | 5.31  | 5.06  | 5.02  | 4.74  | 5.80 | 6.73 | 6.73 | 6.42  |
| Down               | ENSMUSG00000052404 | -2.32    | 3.46E-06 | Silf5          | protein_coding | 4.77  | 5.26  | 4.73  | 5.07  | 3.40 | 3.07 | 3.40 | 3.89  |
| Down               | ENSMUSG00000035894 | -1.23    | 3.49E-   |                |                |       |       |       |       |      |      |      |       |



|      |                     |       |          |               |                |       |       |       |       |      |      |      |      |
|------|---------------------|-------|----------|---------------|----------------|-------|-------|-------|-------|------|------|------|------|
| Down | ENSMUSG00000030889  | -1.44 | 3.67E-06 | Vwa3a         | protein_coding | 6.00  | 6.06  | 6.20  | 6.30  | 3.45 | 4.99 | 4.69 | 5.51 |
| Down | ENSMUSG00000073907  | -2.70 | 3.73E-06 | Olfir689      | protein_coding | 3.61  | 3.52  | 4.05  | 3.98  | 2.00 | 2.70 | 2.54 | 2.54 |
| Down | ENSMUSG00000036944  | -3.85 | 3.79E-06 | Tmem71        | protein_coding | 4.11  | 3.83  | 4.01  | 3.94  | 2.00 | 2.44 | 2.00 | 2.54 |
| Down | ENSMUSG000000021760 | -1.75 | 3.81E-06 | Gpx8          | protein_coding | 4.48  | 4.61  | 4.43  | 4.96  | 3.29 | 3.73 | 3.35 | 2.92 |
| Down | ENSMUSG000000060591 | -3.76 | 3.92E-06 | lftm2         | protein_coding | 4.84  | 4.74  | 4.68  | 4.91  | 2.97 | 2.70 | 2.00 | 2.24 |
| Up   | ENSMUSG00000010080  | 1.40  | 3.96E-06 | Epr3          | protein_coding | 5.21  | 4.67  | 4.09  | 5.63  | 6.13 | 6.58 | 6.36 | 6.07 |
| Up   | ENSMUSG000000027568 | 1.13  | 4.02E-06 | Igfbp4        | protein_coding | 5.99  | 5.72  | 5.93  | 6.41  | 7.30 | 6.41 | 7.02 | 7.01 |
| Down | ENSMUSG00000027932  | -1.46 | 4.09E-06 | Slc27a3       | protein_coding | 5.15  | 5.41  | 5.17  | 4.82  | 3.29 | 4.01 | 4.43 | 3.85 |
| Down | ENSMUSG00000037708  | -2.00 | 4.13E-06 | Spag6         | protein_coding | 4.80  | 4.56  | 4.49  | 4.39  | 2.66 | 3.22 | 2.63 | 3.78 |
| Down | ENSMUSG00000030108  | -1.80 | 4.13E-06 | Slc6a13       | protein_coding | 4.80  | 4.67  | 4.43  | 4.58  | 3.11 | 3.17 | 2.93 | 3.85 |
| Down | ENSMUSG00000027115  | -1.77 | 4.15E-06 | Kif18a        | protein_coding | 4.07  | 4.41  | 4.46  | 4.39  | 3.11 | 3.05 | 3.13 | 3.23 |
| Down | ENSMUSG00000062438  | -4.00 | 4.23E-06 | Adam1b        | protein_coding | 3.31  | 2.95  | 3.97  | 3.55  | 2.00 | 2.00 | 2.13 | 2.44 |
| Down | ENSMUSG00000091191  | -2.31 | 4.36E-06 | Gm17334       | protein_coding | 3.86  | 4.01  | 4.05  | 4.15  | 2.66 | 2.34 | 2.79 | 2.92 |
| Down | ENSMUSG00000046186  | -2.52 | 4.37E-06 | Cd109         | protein_coding | 5.66  | 5.33  | 5.61  | 5.57  | 3.04 | 2.12 | 4.04 | 4.08 |
| Down | ENSMUSG00000024986  | -3.02 | 4.42E-06 | Hhex          | protein_coding | 3.81  | 4.13  | 4.09  | 4.42  | 3.04 | 2.00 | 2.35 | 2.44 |
| Down | ENSMUSG00000046922  | -2.66 | 4.46E-06 | Gpr6          | protein_coding | 4.29  | 4.01  | 3.97  | 4.12  | 2.25 | 2.44 | 2.13 | 3.29 |
| Up   | ENSMUSG000000021200 | 1.74  | 4.49E-06 | Asb2          | protein_coding | 4.39  | 3.78  | 4.40  | 4.02  | 5.75 | 5.89 | 5.58 | 5.41 |
| Down | ENSMUSG000000028965 | -3.00 | 4.62E-06 | Tnfrsf9       | protein_coding | 3.25  | 4.37  | 3.97  | 4.05  | 2.37 | 2.92 | 2.00 | 2.34 |
| Down | ENSMUSG000000042099 | -1.14 | 4.66E-06 | Kank3         | protein_coding | 5.66  | 5.43  | 6.20  | 5.41  | 4.68 | 4.27 | 5.04 | 4.70 |
| Down | ENSMUSG000000087158 | -2.42 | 4.70E-06 | Cc444         | protein_coding | 5.15  | 5.17  | 5.69  | 5.62  | 3.04 | 2.62 | 3.45 | 4.31 |
| Down | ENSMUSG000000091631 | -2.55 | 4.71E-06 | Vmn2r65       | protein_coding | 4.39  | 4.79  | 4.75  | 4.65  | 2.66 | 2.66 | 2.86 | 3.44 |
| Up   | ENSMUSG000000031636 | 1.47  | 4.75E-06 | Pdim3         | protein_coding | 4.15  | 4.31  | 4.13  | 4.39  | 5.72 | 5.05 | 5.27 | 5.86 |
| Down | ENSMUSG00000014158  | -2.39 | 4.79E-06 | Trpv4         | protein_coding | 5.00  | 3.92  | 4.34  | 5.52  | 2.78 | 2.71 | 3.89 | 3.89 |
| Down | ENSMUSG00000070601  | -2.98 | 4.93E-06 | Vmn2r84       | protein_coding | 3.99  | 4.01  | 3.49  | 4.22  | 2.00 | 2.62 | 2.00 | 2.92 |
| Down | ENSMUSG00000027568  | -1.82 | 4.94E-06 | Ntsr1         | protein_coding | 4.62  | 5.31  | 5.02  | 5.48  | 4.13 | 3.80 | 2.24 | 3.95 |
| Down | ENSMUSG00000072770  | -1.58 | 4.94E-06 | Acrbp         | protein_coding | 4.59  | 4.77  | 4.87  | 4.58  | 3.11 | 4.10 | 2.93 | 3.57 |
| Down | ENSMUSG00000056870  | -2.71 | 4.98E-06 | Gulp1         | protein_coding | 4.57  | 4.01  | 4.65  | 4.85  | 3.35 | 2.00 | 2.24 | 3.17 |
| Down | ENSMUSG00000021592  | -1.37 | 5.37E-06 | Arsk          | protein_coding | 5.48  | 6.05  | 5.61  | 5.58  | 3.92 | 4.16 | 5.00 | 4.63 |
| Down | ENSMUSG00000027849  | -2.12 | 5.43E-06 | Syl6          | protein_coding | 5.87  | 5.90  | 6.00  | 5.92  | 4.13 | 2.79 | 4.92 | 4.92 |
| Down | ENSMUSG00000096385  | -3.53 | 5.44E-06 | Gm11168       | protein_coding | 10.49 | 10.82 | 10.64 | 11.20 | 6.80 | 7.63 | 6.28 | 7.96 |
| Up   | ENSMUSG000000030609 | 1.00  | 5.45E-06 | Aen           | protein_coding | 6.97  | 6.79  | 7.00  | 6.76  | 7.96 | 7.35 | 8.19 | 7.82 |
| Down | ENSMUSG000000005803 | -1.65 | 5.49E-06 | Sqor          | protein_coding | 5.17  | 5.21  | 4.75  | 5.33  | 3.35 | 3.87 | 3.54 | 4.25 |
| Down | ENSMUSG000000019485 | -4.31 | 5.66E-06 | Olfir07       | protein_coding | 4.03  | 4.44  | 4.03  | 4.15  | 4.44 | 2.24 | 2.62 | 2.62 |
| Down | ENSMUSG000000062960 | -1.73 | 5.80E-06 | Kalr          | protein_coding | 5.10  | 5.66  | 5.05  | 5.34  | 3.39 | 3.64 | 3.24 | 4.74 |
| Down | ENSMUSG000000078902 | -1.51 | 5.81E-06 | Gm14443       | protein_coding | 4.54  | 4.58  | 5.45  | 4.89  | 4.16 | 3.52 | 3.13 | 3.89 |
| Down | ENSMUSG000000034872 | -2.54 | 5.83E-06 | Gipc3         | protein_coding | 4.59  | 3.88  | 4.33  | 4.49  | 2.37 | 2.85 | 2.63 | 2.99 |
| Down | ENSMUSG00000066442  | -1.22 | 5.86E-06 | Mths          | protein_coding | 5.61  | 5.47  | 5.42  | 5.19  | 4.28 | 4.64 | 4.10 | 4.43 |
| Down | ENSMUSG00000030677  | -1.17 | 5.89E-06 | Klf22         | protein_coding | 5.24  | 5.49  | 4.65  | 4.82  | 4.10 | 4.19 | 3.87 | 4.28 |
| Down | ENSMUSG00000026480  | -1.76 | 5.90E-06 | Ncf2          | protein_coding | 5.66  | 5.68  | 5.31  | 5.16  | 3.89 | 4.13 | 2.45 | 4.70 |
| Down | ENSMUSG000000069633 | -1.73 | 5.94E-06 | Pex11g        | protein_coding | 3.81  | 4.74  | 4.95  | 4.34  | 3.11 | 3.05 | 2.63 | 3.99 |
| Down | ENSMUSG000000037664 | -1.71 | 6.16E-06 | Cdkn1c        | protein_coding | 5.42  | 4.47  | 4.43  | 5.52  | 3.11 | 3.77 | 4.07 | 3.66 |
| Down | ENSMUSG000000021866 | -1.34 | 6.23E-06 | Anxa11        | protein_coding | 6.42  | 6.04  | 6.10  | 5.87  | 4.47 | 4.16 | 5.51 | 5.11 |
| Down | ENSMUSG00000040983  | -1.09 | 6.25E-06 | Tmem205       | protein_coding | 5.86  | 5.84  | 5.95  | 5.76  | 4.99 | 4.07 | 4.71 | 5.42 |
| Down | ENSMUSG000000062175 | -1.40 | 6.26E-06 | Tgif2         | protein_coding | 4.93  | 4.91  | 5.57  | 5.19  | 3.69 | 4.04 | 3.83 | 4.41 |
| Down | ENSMUSG000000049929 | -3.07 | 6.45E-06 | Lpar4         | protein_coding | 4.22  | 4.37  | 4.43  | 5.09  | 2.13 | 3.38 | 2.45 | 2.34 |
| Up   | ENSMUSG000000032265 | 1.92  | 6.47E-06 | Tent5a        | protein_coding | 5.86  | 5.74  | 5.94  | 6.06  | 7.40 | 7.92 | 8.21 | 7.30 |
| Down | ENSMUSG000000028943 | -1.64 | 6.53E-06 | Espn          | protein_coding | 5.79  | 5.89  | 5.86  | 5.73  | 4.61 | 4.62 | 3.02 | 3.02 |
| Down | ENSMUSG000000058620 | -6.08 | 6.57E-06 | Adra2b        | protein_coding | 2.85  | 3.39  | 2.93  | 3.15  | 2.00 | 2.00 | 2.00 | 2.00 |
| Down | ENSMUSG000000092049 | -4.15 | 6.66E-06 | Vmn2r4        | protein_coding | 4.07  | 4.89  | 4.54  | 4.07  | 2.70 | 2.00 | 2.54 | 2.00 |
| Down | ENSMUSG00000076435  | -1.40 | 6.66E-06 | Acsf2         | protein_coding | 6.37  | 6.33  | 6.32  | 6.13  | 5.46 | 3.65 | 5.39 | 4.92 |
| Down | ENSMUSG00000040569  | -1.89 | 6.83E-06 | Slc26a7       | protein_coding | 4.11  | 4.72  | 4.37  | 4.09  | 2.90 | 3.11 | 2.93 | 3.29 |
| Down | ENSMUSG00000029925  | -1.67 | 6.83E-06 | Tbxas1        | protein_coding | 4.65  | 4.93  | 5.35  | 4.94  | 3.17 | 3.22 | 3.40 | 4.46 |
| Up   | ENSMUSG000000110086 | 1.75  | 6.84E-06 | Gm45623       | protein_coding | 3.10  | 3.83  | 3.65  | 3.50  | 5.02 | 4.64 | 4.57 | 5.24 |
| Down | ENSMUSG000000030047 | -1.64 | 6.91E-06 | Arhgap25      | protein_coding | 5.58  | 5.10  | 5.52  | 5.33  | 4.19 | 4.30 | 2.54 | 4.38 |
| Down | ENSMUSG000000030339 | -1.79 | 7.25E-06 | Ltbr          | protein_coding | 5.51  | 4.95  | 5.57  | 5.08  | 4.03 | 2.34 | 4.30 | 4.20 |
| Down | ENSMUSG000000063953 | -1.84 | 7.26E-06 | Amd2          | protein_coding | 4.11  | 4.37  | 4.13  | 4.63  | 3.40 | 3.33 | 2.63 | 2.85 |
| Down | ENSMUSG000000031283 | -2.58 | 7.29E-06 | Chrd1         | protein_coding | 3.61  | 5.26  | 4.95  | 5.17  | 3.69 | 3.17 | 2.00 | 3.17 |
| Down | ENSMUSG000000027875 | -2.01 | 7.34E-06 | Hmgcs2        | protein_coding | 4.89  | 4.93  | 4.89  | 4.89  | 2.57 | 4.24 | 3.30 | 3.12 |
| Down | ENSMUSG000000036522 | -2.82 | 7.38E-06 | Mfsd4b1       | protein_coding | 3.72  | 5.15  | 4.20  | 4.45  | 3.11 | 2.34 | 2.00 | 3.12 |
| Down | ENSMUSG000000033591 | -2.46 | 7.39E-06 | Igf2bp2       | protein_coding | 3.72  | 4.47  | 5.02  | 4.48  | 2.74 | 3.38 | 2.00 | 3.06 |
| Down | ENSMUSG000000031552 | -3.48 | 7.58E-06 | Adam18        | protein_coding | 3.95  | 4.47  | 3.90  | 4.09  | 2.00 | 2.44 | 2.13 | 2.78 |
| Down | ENSMUSG000000024960 | -1.05 | 7.61E-06 | Plcb3         | protein_coding | 6.27  | 6.30  | 6.12  | 6.21  | 4.49 | 4.49 | 4.94 | 5.56 |
| Down | ENSMUSG000000048939 | -1.67 | 7.62E-06 | Atp13a5       | protein_coding | 5.24  | 5.31  | 5.00  | 5.49  | 4.68 | 3.05 | 3.00 | 4.17 |
| Up   | ENSMUSG000000037188 | 1.58  | 7.68E-06 | Grh3          | protein_coding | 4.29  | 3.88  | 3.70  | 4.31  | 4.84 | 5.18 | 5.78 | 5.62 |
| Down | ENSMUSG00000027490  | -1.44 | 8.00E-06 | E2f1          | protein_coding | 5.13  | 5.31  | 5.53  | 5.45  | 2.97 | 3.94 | 4.43 | 4.40 |
| Down | ENSMUSG000000022683 | -2.67 | 8.17E-06 | Pla2g10       | protein_coding | 3.91  | 4.64  | 4.52  | 4.63  | 2.13 | 2.44 | 2.71 | 3.74 |
| Down | ENSMUSG000000030966 | -1.59 | 8.24E-06 | Trim21        | protein_coding | 4.93  | 4.69  | 4.60  | 4.76  | 2.90 | 3.91 | 3.30 | 3.81 |
| Down | ENSMUSG000000038663 | -2.73 | 8.25E-06 | Fsd2          | protein_coding | 3.99  | 4.41  | 3.93  | 4.25  | 2.00 | 2.24 | 2.79 | 3.12 |
| Up   | ENSMUSG000000005057 | 1.03  | 8.31E-06 | Sh2b2         | protein_coding | 5.41  | 5.41  | 5.02  | 5.14  | 6.56 | 6.03 | 6.11 | 6.06 |
| Down | ENSMUSG000000048120 | -2.00 | 8.32E-06 | Entpd1        | protein_coding | 6.33  | 6.26  | 6.53  | 6.38  | 4.59 | 4.78 | 2.71 | 5.71 |
| Down | ENSMUSG000000002699 | -2.02 | 8.49E-06 | Lcp2          | protein_coding | 5.44  | 5.50  | 4.85  | 5.07  | 2.37 | 3.28 | 4.13 | 4.08 |
| Down | ENSMUSG000000070780 | -2.11 | 8.52E-06 | Rbm47         | protein_coding | 5.69  | 4.74  | 4.34  | 4.34  | 3.50 | 2.92 | 3.24 | 4.59 |
| Down | ENSMUSG000000021903 | -2.25 | 8.64E-06 | Gai1t5        | protein_coding | 4.11  | 4.79  | 4.07  | 4.63  | 3.17 | 3.17 | 3.06 | 3.06 |
| Down | ENSMUSG000000024196 | -2.45 | 8.11E-06 | Dnss2         | protein_coding | 3.38  | 3.63  | 4.05  | 4.05  | 2.82 | 2.44 | 2.00 | 2.54 |
| Up   | ENSMUSG000000055775 | 1.21  | 9.33E-06 | Myn8          | protein_coding | 5.12  | 5.71  | 5.78  | 5.76  | 6.17 | 6.17 | 6.95 | 6.75 |
| Down | ENSMUSG000000071713 | -1.94 | 9.35E-06 | Csf2rb        | protein_coding | 4.84  | 4.13  | 4.82  | 4.45  | 3.69 | 3.05 | 2.45 | 3.39 |
| Down | ENSMUSG000000036647 | -3.62 | 9.41E-06 | Olfir6        | protein_coding | 3.56  | 4.58  | 4.13  | 4.09  | 2.35 | 4.09 | 2.35 | 2.54 |
| Down | ENSMUSG000000074342 | -2.12 | 9.46E-06 | 1830077J02Rik | protein_coding | 4.18  | 4.58  | 4.05  | 4.25  | 2.47 | 3.11 | 3.35 | 2.54 |
| Down | ENSMUSG000000021572 | -1.22 | 9.46E-06 | Cep72         | protein_coding | 4.72  | 4.93  | 4.57  | 4.98  | 3.23 | 4.16 | 3.87 | 3.95 |
| Down | ENSMUSG000000034401 | -1.41 | 9.54E-06 | Spata6        | protein_coding | 5.45  | 5.04  | 5.48  | 5.57  | 3.89 | 3.98 | 4.59 | 4.23 |
| Down | ENSMUSG000000051413 | -1.22 | 9.57E-06 | Plagl2        | protein_coding | 6.17  | 6.64  | 6.46  | 6.50  | 4.19 | 6.05 | 5.30 | 5.17 |
| Down | ENSMUSG000000020641 | -2.95 | 9.62E-06 | Rsad2         | protein_coding | 3.61  | 4.24  | 3.70  | 4.09  | 2.37 | 2.78 | 2.13 | 2.44 |
| Up   | ENSMUSG000000023905 | 1.60  | 9.74E-06 | Tnfrsf12a     | protein_coding | 4.39  | 3.78  | 3.70  | 4.15  | 4.63 | 5.74 | 5.73 | 5.15 |
| Down | ENSMUSG000000020542 | -2.40 | 9.79E-06 | Myocd         | protein_coding | 4.39  | 4.41  | 4.40  | 4.67  | 2.57 | 3.17 | 2.45 | 3.23 |
| Down | ENSMUSG000000035355 | -1.67 | 1.01E-05 | Kcnh4         | protein_coding | 4.57  | 4.13  | 4.13  | 4.70  | 3.58 | 3.38 | 2.00 | 3.53 |
| Down | ENSMUSG000000029700 | -2.65 | 1.04E-05 | Slc13a1       | protein_coding | 4.42  | 4.47  | 4.75  | 4.98  | 2.00 | 3.28 | 2.63 | 3.29 |
| Down | ENSMUSG000000009568 | -1.79 | 1.04E-05 | Prot2         | protein_coding | 5.58  | 5.59  | 5.50  | 5.59  | 4.84 | 5.66 |      |      |

|      |                      |       |          |               |                |      |       |       |       |       |      |      |      |
|------|----------------------|-------|----------|---------------|----------------|------|-------|-------|-------|-------|------|------|------|
| Down | ENSMUSG00000105504   | -2.77 | 1.06E-05 | Gbp5          | protein_coding | 4.26 | 4.74  | 4.70  | 4.19  | 2.25  | 2.34 | 2.63 | 3.44 |
| Down | ENSMUSG00000028392   | -2.64 | 1.06E-05 | Bspry         | protein_coding | 4.15 | 4.50  | 4.05  | 3.78  | 2.57  | 2.53 | 2.00 | 3.17 |
| Up   | ENSMUSG00000042529   | 1.02  | 1.07E-05 | Kcnj12        | protein_coding | 5.82 | 6.06  | 5.40  | 5.48  | 6.86  | 6.74 | 6.30 | 6.74 |
| Down | ENSMUSG000000024168  | -1.97 | 1.07E-05 | Tmem204       | protein_coding | 4.72 | 4.61  | 4.75  | 4.39  | 2.57  | 2.70 | 3.94 | 3.23 |
| Down | ENSMUSG000000003824  | -1.75 | 1.12E-05 | Syce2         | protein_coding | 5.55 | 5.21  | 5.32  | 5.09  | 3.17  | 4.35 | 3.54 | 4.08 |
| Down | ENSMUSG000000050103  | -1.61 | 1.14E-05 | Agmo          | protein_coding | 5.17 | 5.23  | 4.63  | 5.14  | 3.60  | 3.56 | 3.50 | 4.25 |
| Down | ENSMUSG000000046799  | -1.67 | 1.15E-05 | Rhcg          | protein_coding | 5.61 | 5.31  | 5.49  | 5.31  | 4.39  | 4.78 | 4.50 | 3.92 |
| Down | ENSMUSG00000108748   | -3.31 | 1.18E-05 | Gm44679       | protein_coding | 4.32 | 4.13  | 4.13  | 4.19  | 2.00  | 2.00 | 2.85 | 2.85 |
| Down | ENSMUSG00000040812   | -1.64 | 1.18E-05 | Agbl2         | protein_coding | 5.42 | 5.60  | 5.11  | 5.50  | 2.90  | 4.40 | 4.04 | 4.38 |
| Down | ENSMUSG00000020904   | -2.54 | 1.20E-05 | Cfap52        | protein_coding | 4.07 | 5.08  | 5.08  | 4.98  | 2.82  | 2.24 | 2.35 | 4.02 |
| Down | ENSMUSG00000108929   | -2.14 | 1.21E-05 | Cc2d2b        | protein_coding | 4.54 | 4.69  | 5.00  | 4.87  | 2.37  | 3.43 | 2.86 | 3.81 |
| Down | ENSMUSG000000031351  | -2.53 | 1.23E-05 | Zfp185        | protein_coding | 4.15 | 4.09  | 4.57  | 5.11  | 2.00  | 3.05 | 2.54 | 3.48 |
| Up   | ENSMUSG00000006342   | 1.30  | 1.24E-05 | Susd2         | protein_coding | 4.36 | 4.09  | 3.89  | 4.22  | 5.04  | 4.85 | 5.20 | 5.70 |
| Down | ENSMUSG000000084262  | -4.30 | 1.24E-05 | Olfv588-ps1   | protein_coding | 3.95 | 4.01  | 3.54  | 4.53  | 2.00  | 2.00 | 2.24 | 2.54 |
| Down | ENSMUSG00000062713   | -3.95 | 1.24E-05 | Sim2          | protein_coding | 3.77 | 3.97  | 3.60  | 3.08  | 2.00  | 2.12 | 2.13 | 2.44 |
| Down | ENSMUSG000000095891  | -3.26 | 1.24E-05 | Gm10717       | protein_coding | 9.97 | 10.45 | 10.26 | 10.79 | 6.64  | 7.23 | 6.39 | 7.93 |
| Down | ENSMUSG000000027886  | -2.27 | 1.24E-05 | 1700013F07Rik | protein_coding | 4.39 | 3.88  | 4.09  | 4.19  | 2.97  | 2.98 | 2.54 | 2.54 |
| Down | ENSMUSG000000057278  | -1.08 | 1.24E-05 | Snrgp         | protein_coding | 5.36 | 5.72  | 5.74  | 5.90  | 4.66  | 4.24 | 4.99 | 4.93 |
| Up   | ENSMUSG000000036295  | 1.15  | 1.25E-05 | Atg9b         | protein_coding | 4.84 | 4.64  | 5.02  | 4.85  | 5.90  | 5.71 | 5.59 | 6.22 |
| Down | ENSMUSG000000043122  | -2.26 | 1.25E-05 | A530016L24Rik | protein_coding | 3.72 | 3.52  | 3.70  | 3.55  | 2.00  | 2.00 | 3.24 | 2.44 |
| Down | ENSMUSG000000044702  | -2.05 | 1.25E-05 | Pati2         | protein_coding | 3.95 | 4.53  | 4.97  | 4.67  | 2.47  | 2.71 | 3.85 | 3.85 |
| Down | ENSMUSG000000054986  | -2.56 | 1.26E-05 | Sec14i3       | protein_coding | 4.89 | 4.91  | 5.17  | 4.87  | 2.00  | 2.53 | 3.54 | 3.70 |
| Down | ENSMUSG000000032057  | -6.05 | 1.27E-05 | 4833427G06Rik | protein_coding | 2.85 | 3.03  | 2.84  | 3.50  | 2.00  | 2.00 | 2.00 | 2.00 |
| Down | ENSMUSG000000041117  | -1.85 | 1.27E-05 | Ccdc8         | protein_coding | 4.62 | 4.79  | 4.43  | 4.55  | 2.66  | 3.61 | 2.63 | 3.78 |
| Up   | ENSMUSG000000021411  | 1.13  | 1.29E-05 | Pxdc1         | protein_coding | 5.21 | 5.38  | 5.48  | 5.44  | 6.32  | 6.63 | 6.11 | 6.58 |
| Down | ENSMUSG000000039238  | -2.37 | 1.29E-05 | Zfp750        | protein_coding | 4.03 | 3.03  | 3.54  | 3.33  | 2.47  | 2.53 | 2.00 | 2.70 |
| Down | ENSMUSG000000067818  | -2.11 | 1.30E-05 | Myf9          | protein_coding | 4.00 | 4.50  | 4.20  | 4.72  | 2.00  | 3.47 | 2.11 | 2.34 |
| Down | ENSMUSG000000033386  | -1.97 | 1.31E-05 | Frrs1         | protein_coding | 5.44 | 5.28  | 4.85  | 5.65  | 3.64  | 4.19 | 2.35 | 4.11 |
| Down | ENSMUSG000000073294  | -4.64 | 1.33E-05 | AU022751      | protein_coding | 3.10 | 3.19  | 3.70  | 3.65  | 2.00  | 2.00 | 2.00 | 2.34 |
| Down | ENSMUSG000000026380  | -1.57 | 1.35E-05 | Tfcp2l1       | protein_coding | 6.11 | 6.35  | 5.19  | 5.97  | 3.92  | 5.29 | 3.50 | 4.87 |
| Down | ENSMUSG000000019874  | -2.06 | 1.36E-05 | Fabp7         | protein_coding | 6.34 | 6.33  | 7.21  | 7.24  | 4.86  | 5.05 | 4.54 | 5.21 |
| Down | ENSMUSG000000091243  | -1.17 | 1.37E-05 | Vgll3         | protein_coding | 6.16 | 6.65  | 5.64  | 6.85  | 5.09  | 5.62 | 5.27 | 5.20 |
| Down | ENSMUSG000000050079  | -3.70 | 1.44E-05 | Gpr171        | protein_coding | 2.85 | 3.11  | 3.25  | 2.00  | 2.44  | 2.00 | 2.00 | 2.00 |
| Up   | ENSMUSG000000030689  | 1.45  | 1.45E-05 | Calca         | protein_coding | 3.77 | 3.87  | 3.60  | 3.86  | 5.07  | 5.10 | 4.81 | 5.10 |
| Down | ENSMUSG000000032110  | -3.95 | 1.46E-05 | Acv1          | protein_coding | 3.86 | 4.20  | 3.70  | 3.90  | 2.00  | 2.44 | 2.00 | 2.44 |
| Down | ENSMUSG000000032343  | -3.03 | 1.46E-05 | Impg1         | protein_coding | 3.86 | 4.20  | 3.54  | 4.48  | 2.66  | 2.00 | 2.00 | 2.99 |
| Down | ENSMUSG000000090035  | -1.60 | 1.46E-05 | Gaint4        | protein_coding | 4.84 | 4.95  | 5.19  | 5.20  | 3.50  | 3.94 | 4.16 | 3.34 |
| Down | ENSMUSG000000027887  | -1.51 | 1.46E-05 | Sypl2         | protein_coding | 4.72 | 5.04  | 5.09  | 5.16  | 3.85  | 4.07 | 3.07 | 4.02 |
| Down | ENSMUSG000000044055  | -4.34 | 1.48E-05 | Otos          | protein_coding | 3.44 | 3.78  | 4.37  | 3.90  | 2.00  | 2.00 | 2.24 | 2.44 |
| Down | ENSMUSG000000037086  | -4.43 | 1.49E-05 | Prr32         | protein_coding | 3.61 | 3.19  | 2.42  | 4.37  | 2.13  | 2.00 | 2.00 | 2.34 |
| Down | ENSMUSG000000026167  | -2.24 | 1.49E-05 | Wnt10a        | protein_coding | 4.65 | 4.95  | 4.46  | 4.34  | 2.25  | 2.98 | 2.35 | 3.95 |
| Down | ENSMUSG000000026479  | -1.45 | 1.50E-05 | Lamc2         | protein_coding | 5.81 | 5.53  | 5.73  | 5.54  | 3.81  | 5.20 | 3.61 | 4.38 |
| Up   | ENSMUSG000000034771  | 1.15  | 1.52E-05 | Tle2          | protein_coding | 5.57 | 5.26  | 5.45  | 5.50  | 6.84  | 6.17 | 5.71 | 7.02 |
| Down | ENSMUSG000000043029  | -1.52 | 1.54E-05 | Trpv3         | protein_coding | 4.51 | 4.74  | 5.19  | 4.98  | 3.35  | 3.17 | 3.63 | 4.31 |
| Down | ENSMUSG000000092162  | -2.65 | 1.59E-05 | Vmn2r86       | protein_coding | 3.95 | 4.47  | 3.75  | 4.12  | 2.00  | 2.24 | 2.63 | 3.23 |
| Down | ENSMUSG000000020399  | -2.13 | 1.60E-05 | Havr2         | protein_coding | 4.45 | 4.79  | 4.65  | 4.78  | 2.62  | 2.44 | 3.50 | 3.57 |
| Down | ENSMUSG000000072949  | -1.47 | 1.60E-05 | Acv1          | protein_coding | 5.96 | 6.00  | 5.94  | 6.00  | 4.76  | 5.00 | 5.00 | 5.00 |
| Down | ENSMUSG000000073940  | -2.12 | 1.64E-05 | Hbb-bt        | protein_coding | 3.50 | 4.01  | 3.60  | 4.02  | 2.74  | 2.85 | 2.13 | 2.78 |
| Down | ENSMUSG000000020566  | -2.55 | 1.65E-05 | Atp6v1c2      | protein_coding | 3.91 | 4.31  | 4.30  | 4.42  | 2.97  | 2.44 | 2.00 | 3.17 |
| Down | ENSMUSG000000074215  | -1.58 | 1.67E-05 | Gm10643       | protein_coding | 5.79 | 5.52  | 5.72  | 5.72  | 4.19  | 5.78 | 4.57 | 4.95 |
| Up   | ENSMUSG000000039481  | 1.50  | 1.72E-05 | Ntn           | protein_coding | 4.03 | 3.57  | 3.43  | 3.65  | 4.84  | 5.17 | 5.22 | 3.85 |
| Down | ENSMUSG000000026303  | -1.61 | 1.74E-05 | Mlph          | protein_coding | 4.77 | 5.00  | 4.63  | 4.28  | 3.81  | 3.69 | 2.79 | 3.44 |
| Down | ENSMUSG000000019539  | -2.59 | 1.78E-05 | Rcn3          | protein_coding | 4.51 | 5.15  | 5.27  | 5.16  | 3.77  | 2.44 | 2.54 | 2.24 |
| Down | ENSMUSG000000038387  | -1.58 | 1.78E-05 | Rras          | protein_coding | 5.47 | 4.95  | 5.46  | 5.53  | 2.82  | 3.91 | 4.73 | 4.11 |
| Up   | ENSMUSG000000037349  | 1.60  | 1.79E-05 | Nudt22        | protein_coding | 3.91 | 3.83  | 4.09  | 3.50  | 5.58  | 4.68 | 5.45 | 4.63 |
| Down | ENSMUSG000000046056  | -1.57 | 1.79E-05 | Sbsn          | protein_coding | 4.65 | 4.86  | 4.95  | 4.72  | 3.55  | 3.05 | 3.19 | 4.25 |
| Down | ENSMUSG000000068854  | -1.14 | 1.81E-05 | Hist2h2be     | protein_coding | 5.94 | 5.70  | 5.19  | 5.94  | 4.33  | 4.42 | 4.33 | 4.25 |
| Down | ENSMUSG000000035298  | -2.37 | 1.82E-05 | Klh35         | protein_coding | 3.18 | 4.01  | 4.24  | 4.39  | 2.74  | 2.00 | 2.00 | 3.44 |
| Down | ENSMUSG000000045392  | -6.27 | 1.84E-05 | Kera          | protein_coding | 3.18 | 3.46  | 2.54  | 3.45  | 2.00  | 2.00 | 2.00 | 2.00 |
| Down | ENSMUSG000000024659  | -2.86 | 1.84E-05 | Anx1          | protein_coding | 3.56 | 3.63  | 3.93  | 4.05  | 2.57  | 2.63 | 2.44 | 2.44 |
| Down | ENSMUSG000000038496  | -1.20 | 1.85E-05 | Pou2f2        | protein_coding | 6.22 | 6.16  | 5.82  | 6.27  | 5.76  | 4.24 | 4.38 | 5.21 |
| Down | ENSMUSG000000055547  | -4.89 | 1.86E-05 | Apobec4       | protein_coding | 3.18 | 2.76  | 3.54  | 3.33  | 2.00  | 2.00 | 2.00 | 2.24 |
| Down | ENSMUSG000000070532  | -2.43 | 1.90E-05 | Ccdc190       | protein_coding | 6.70 | 6.61  | 6.51  | 6.65  | 4.78  | 4.85 | 2.00 | 4.68 |
| Down | ENSMUSG000000027082  | -1.62 | 1.92E-05 | Tfpi          | protein_coding | 4.36 | 4.91  | 5.20  | 4.98  | 2.66  | 3.98 | 3.94 | 3.57 |
| Down | ENSMUSG000000026348  | -2.24 | 1.95E-05 | Acmds         | protein_coding | 3.95 | 4.37  | 4.30  | 4.22  | 2.66  | 2.00 | 2.54 | 3.62 |
| Down | ENSMUSG000000019832  | -2.45 | 1.96E-05 | Rab32         | protein_coding | 4.67 | 4.58  | 3.09  | 4.45  | 2.66  | 2.98 | 2.71 | 2.78 |
| Up   | ENSMUSG000000037625  | 1.08  | 1.97E-05 | Cldn11        | protein_coding | 9.01 | 8.70  | 8.85  | 8.69  | 10.47 | 9.12 | 9.68 | 9.95 |
| Down | ENSMUSG000000079363  | -2.47 | 1.97E-05 | Gbp4          | protein_coding | 5.00 | 4.34  | 4.46  | 4.58  | 2.00  | 2.85 | 2.35 | 3.85 |
| Down | ENSMUSG000000089669  | -1.81 | 1.97E-05 | Tnfrsf13      | protein_coding | 4.07 | 4.41  | 4.43  | 4.53  | 3.04  | 3.43 | 2.54 | 3.34 |
| Down | ENSMUSG000000022704  | -1.06 | 1.97E-05 | Qtrt2         | protein_coding | 6.35 | 6.22  | 6.82  | 6.93  | 6.26  | 6.93 | 5.31 | 6.98 |
| Down | ENSMUSG000000031491  | -3.76 | 2.00E-05 | Chrna6        | protein_coding | 3.81 | 3.57  | 3.80  | 2.47  | 2.00  | 2.00 | 2.00 | 2.44 |
| Down | ENSMUSG000000045392  | -6.39 | 2.02E-05 | Olfir1033     | protein_coding | 3.99 | 3.26  | 2.64  | 2.00  | 2.77  | 2.00 | 2.00 | 2.00 |
| Down | ENSMUSG000000019446  | -1.57 | 2.04E-05 | Esam          | protein_coding | 4.45 | 4.74  | 4.91  | 4.92  | 3.11  | 3.11 | 4.08 | 3.71 |
| Down | ENSMUSG000000031373  | -1.91 | 2.07E-05 | Gerb3         | protein_coding | 4.77 | 4.74  | 4.82  | 5.05  | 2.37  | 4.07 | 3.45 | 3.92 |
| Up   | ENSMUSG0000000115112 | 1.40  | 2.08E-05 | Slc25a13      | protein_coding | 4.18 | 4.09  | 5.05  | 4.22  | 5.47  | 5.72 | 6.14 | 5.15 |
| Down | ENSMUSG000000048001  | -1.46 | 2.08E-05 | Hes5          | protein_coding | 5.02 | 4.97  | 5.02  | 5.58  | 3.92  | 2.92 | 4.16 | 4.46 |
| Down | ENSMUSG000000101391  | -7.07 | 2.13E-05 | Olfir1217     | protein_coding | 4.07 | 4.84  | 3.80  | 4.00  | 2.00  | 2.00 | 2.00 | 2.12 |
| Down | ENSMUSG000000063661  | -2.28 | 2.13E-05 | Krt73         | protein_coding | 5.51 | 4.69  | 4.57  | 4.60  | 3.55  | 3.05 | 2.93 | 3.29 |
| Down | ENSMUSG000000026069  | -2.28 | 2.15E-05 | Il1r1         | protein_coding | 4.32 | 4.05  | 4.37  | 4.39  | 2.66  | 2.62 | 3.13 | 2.92 |
| Down | ENSMUSG000000040113  | -3.30 | 2.16E-05 | Mett11b       | protein_coding | 4.98 | 3.73  | 4.09  | 4.28  | 2.82  | 2.24 | 2.00 | 2.78 |
| Down | ENSMUSG000000050288  | -1.95 | 2.24E-05 | Fzd2          | protein_coding | 5.31 | 5.06  | 5.04  | 5.28  | 2.66  | 4.37 | 3.40 | 3.53 |
| Down | ENSMUSG000000034151  | -1.86 | 2.24E-05 | Zbbx          | protein_coding | 5.53 | 5.40  | 5.55  | 5.92  | 3.45  | 2.78 | 4.87 | 4.20 |
| Down | ENSMUSG000000024803  | -3.75 | 2.26E-05 | Ankrd1        | protein_coding | 4.26 | 4.31  | 4.09  | 4.58  | 2.00  | 2.34 | 2.00 | 2.62 |
| Down | ENSMUSG000000017309  | -2.68 | 2.26E-05 | Cd300g        | protein_coding | 3.67 | 3.63  | 3.30  | 3.78  | 2.37  | 2.34 | 2.00 | 2.78 |
| Down | ENSMUSG000000071234  | -1.64 | 2.26E-05 | Syndig11      | protein_coding | 6.09 | 6.03  | 6.28  | 5.52  | 5.07  | 3.47 | 4.90 | 4.23 |
| Down | ENSMUSG000000018774  | -1.55 | 2.26E-05 | Cd88          | protein_coding | 4.80 | 4.77  | 4.63  | 5.07  | 3.69  | 4.35 | 3.00 | 2.99 |
| Down | ENSMUSG000000072943  | -2.36 | 2.28E-05 | Pten22        | protein_coding | 4.39 | 4.89  |       |       |       |      |      |      |

|      |                     |       |          |               |                |       |      |      |       |      |      |      |      |
|------|---------------------|-------|----------|---------------|----------------|-------|------|------|-------|------|------|------|------|
| Down | ENSMUSG00000061808  | -5.26 | 2.31E-05 | Tlr           | protein_coding | 12.49 | 6.15 | 5.49 | 13.19 | 7.51 | 3.05 | 2.86 | 7.75 |
| Down | ENSMUSG00000073002  | -2.34 | 2.32E-05 | Vamp5         | protein_coding | 4.03  | 4.09 | 4.27 | 4.09  | 2.37 | 2.34 | 2.54 | 3.39 |
| Down | ENSMUSG00000034422  | -1.62 | 2.33E-05 | Parp14        | protein_coding | 4.91  | 5.43 | 4.87 | 4.63  | 3.29 | 4.10 | 3.07 | 4.05 |
| Down | ENSMUSG00000022754  | -3.39 | 2.37E-05 | Tmem45a       | protein_coding | 4.11  | 3.73 | 3.54 | 3.60  | 2.13 | 2.12 | 2.24 | 2.62 |
| Down | ENSMUSG00000030796  | -2.33 | 2.37E-05 | Tead2         | protein_coding | 4.57  | 4.67 | 4.34 | 4.89  | 3.17 | 2.85 | 2.13 | 3.57 |
| Down | ENSMUSG00000028159  | -1.94 | 2.38E-05 | Dapp1         | protein_coding | 5.48  | 5.71 | 5.34 | 5.49  | 3.69 | 2.00 | 4.47 | 4.33 |
| Down | ENSMUSG00000026493  | -2.22 | 2.42E-05 | Cc2a1         | protein_coding | 4.93  | 4.61 | 4.63 | 5.59  | 2.37 | 3.69 | 3.40 | 3.78 |
| Down | ENSMUSG00000022831  | -1.98 | 2.42E-05 | Hcls1         | protein_coding | 4.42  | 4.89 | 4.63 | 5.45  | 4.19 | 2.98 | 2.54 | 3.39 |
| Down | ENSMUSG00000001288  | -1.26 | 2.42E-05 | Rarg          | protein_coding | 5.42  | 5.68 | 5.98 | 5.79  | 4.39 | 5.48 | 3.90 | 4.14 |
| Down | ENSMUSG00000026224  | -2.38 | 2.43E-05 | 4933407L21Rik | protein_coding | 4.11  | 4.13 | 4.01 | 4.28  | 2.00 | 2.24 | 2.44 | 2.44 |
| Down | ENSMUSG00000032374  | -1.25 | 2.46E-05 | Plod2         | protein_coding | 4.89  | 5.62 | 5.45 | 5.48  | 4.22 | 3.69 | 4.77 | 4.36 |
| Down | ENSMUSG00000041633  | -1.88 | 2.48E-05 | Kctd12b       | protein_coding | 5.69  | 4.89 | 5.34 | 5.59  | 2.57 | 3.98 | 3.67 | 4.57 |
| Down | ENSMUSG00000060794  | -6.05 | 2.50E-05 | Tssk5         | protein_coding | 3.02  | 3.33 | 3.01 | 2.94  | 2.00 | 2.00 | 2.00 | 2.00 |
| Down | ENSMUSG00000064358  | -5.23 | 2.52E-05 | mt-Co3        | protein_coding | 2.75  | 2.66 | 2.42 | 2.94  | 2.00 | 2.00 | 2.00 | 2.00 |
| Down | ENSMUSG00000016756  | -2.83 | 2.52E-05 | Cmah          | protein_coding | 4.57  | 4.61 | 5.38 | 5.09  | 2.47 | 3.47 | 2.93 | 2.78 |
| Down | ENSMUSG00000054626  | -6.01 | 2.54E-05 | Xlr           | protein_coding | 2.85  | 2.66 | 3.01 | 3.55  | 2.00 | 2.00 | 2.00 | 2.00 |
| Down | ENSMUSG00000028600  | -1.86 | 2.54E-05 | Podn          | protein_coding | 4.42  | 4.72 | 5.29 | 4.63  | 2.97 | 2.44 | 4.16 | 3.48 |
| Down | ENSMUSG00000031488  | -1.94 | 2.55E-05 | Rab11fip1     | protein_coding | 5.10  | 5.44 | 4.68 | 5.31  | 3.40 | 3.61 | 2.86 | 4.25 |
| Down | ENSMUSG00000042106  | -1.99 | 2.57E-05 | Inka1         | protein_coding | 5.36  | 4.53 | 5.15 | 4.80  | 2.37 | 4.22 | 2.79 | 3.74 |
| Down | ENSMUSG00000046593  | -1.83 | 2.58E-05 | Tmem215       | protein_coding | 5.17  | 5.71 | 5.72 | 5.57  | 4.42 | 4.22 | 2.13 | 4.33 |
| Down | ENSMUSG00000068304  | -1.43 | 2.58E-05 | Lir2b6        | protein_coding | 5.91  | 5.76 | 5.35 | 5.59  | 4.00 | 3.69 | 3.71 | 5.44 |
| Up   | ENSMUSG00000002661  | 1.11  | 2.63E-05 | Alkbh7        | protein_coding | 4.26  | 4.56 | 4.85 | 4.89  | 5.49 | 5.77 | 5.46 | 5.82 |
| Down | ENSMUSG00000030230  | -2.62 | 2.63E-05 | Plcz1         | protein_coding | 4.36  | 4.01 | 3.97 | 4.15  | 2.74 | 2.12 | 2.25 | 3.12 |
| Down | ENSMUSG00000079427  | -1.09 | 2.64E-05 | Mthfs1        | protein_coding | 5.04  | 5.08 | 5.37 | 5.28  | 4.49 | 4.66 | 3.67 | 4.08 |
| Up   | ENSMUSG00000006270  | 2.33  | 2.66E-05 | Vax1          | protein_coding | 3.25  | 2.66 | 2.54 | 2.94  | 4.59 | 3.80 | 3.60 | 4.17 |
| Down | ENSMUSG00000037279  | -1.78 | 2.69E-05 | Ovol2         | protein_coding | 4.77  | 4.61 | 4.40 | 3.90  | 3.29 | 3.87 | 2.71 | 2.54 |
| Down | ENSMUSG00000102752  | -1.18 | 2.69E-05 | Gm7694        | protein_coding | 5.15  | 5.28 | 5.13 | 5.11  | 4.36 | 4.72 | 3.63 | 3.70 |
| Up   | ENSMUSG00000009633  | 1.17  | 2.70E-05 | G0s2          | protein_coding | 5.34  | 5.64 | 4.70 | 4.74  | 6.68 | 6.06 | 6.20 | 5.88 |
| Down | ENSMUSG00000034467  | -2.46 | 2.72E-05 | Dynlrb2       | protein_coding | 4.84  | 4.37 | 3.70 | 4.05  | 3.35 | 2.78 | 2.35 | 2.44 |
| Down | ENSMUSG00000042284  | -1.22 | 2.72E-05 | Itga1         | protein_coding | 5.55  | 5.86 | 5.26 | 6.14  | 4.39 | 3.84 | 4.65 | 5.33 |
| Down | ENSMUSG00000091318  | -2.54 | 2.74E-05 | Gm5415        | protein_coding | 3.31  | 3.33 | 3.23 | 3.21  | 2.25 | 2.24 | 2.00 | 2.85 |
| Down | ENSMUSG00000040514  | -5.43 | 2.79E-05 | Tex47         | protein_coding | 3.31  | 3.92 | 3.49 | 3.50  | 2.13 | 2.00 | 2.00 | 2.12 |
| Down | ENSMUSG00000074254  | -2.32 | 2.87E-05 | Iih2          | protein_coding | 4.11  | 4.74 | 4.73 | 5.05  | 2.74 | 3.32 | 3.02 | 3.74 |
| Down | ENSMUSG00000015066  | -1.27 | 2.89E-05 | Ctcf1a1       | protein_coding | 4.91  | 5.70 | 6.03 | 5.49  | 4.22 | 4.68 | 4.29 | 4.83 |
| Down | ENSMUSG00000036915  | -1.79 | 2.90E-05 | Kirrel2       | protein_coding | 5.31  | 5.25 | 5.49 | 4.80  | 4.13 | 2.92 | 3.35 | 4.31 |
| Down | ENSMUSG00000069516  | -1.48 | 2.92E-05 | Lyz2          | protein_coding | 5.53  | 5.19 | 5.65 | 4.00  | 4.94 | 4.00 | 3.95 | 4.94 |
| Down | ENSMUSG00000066537  | -1.60 | 2.95E-05 | Vmn2r57       | protein_coding | 5.15  | 5.15 | 4.65 | 5.52  | 2.90 | 4.10 | 4.10 | 3.99 |
| Down | ENSMUSG00000054450  | -1.31 | 2.95E-05 | Gm9945        | protein_coding | 5.23  | 5.25 | 5.57 | 5.19  | 4.42 | 4.58 | 3.40 | 4.17 |
| Down | ENSMUSG00000046192  | -1.32 | 2.96E-05 | Iqub          | protein_coding | 5.33  | 5.44 | 5.27 | 5.60  | 4.47 | 4.35 | 4.27 | 4.02 |
| Down | ENSMUSG00000016024  | -2.08 | 2.97E-05 | Lbp           | protein_coding | 5.39  | 5.17 | 4.73 | 5.59  | 2.97 | 3.61 | 2.25 | 4.53 |
| Down | ENSMUSG00000005540  | -1.59 | 3.00E-05 | Fcer2a        | protein_coding | 4.75  | 4.69 | 4.65 | 4.72  | 3.29 | 2.34 | 4.27 | 3.48 |
| Down | ENSMUSG00000004891  | -1.81 | 3.01E-05 | Nes           | protein_coding | 5.61  | 5.14 | 4.60 | 4.91  | 4.00 | 3.33 | 2.93 | 4.11 |
| Down | ENSMUSG00000096330  | -3.82 | 3.06E-05 | Gm21976       | protein_coding | 3.50  | 3.73 | 4.20 | 3.15  | 2.00 | 2.62 | 2.00 | 2.12 |
| Down | ENSMUSG00000031146  | -1.92 | 3.06E-05 | Plp2          | protein_coding | 4.18  | 3.68 | 4.37 | 4.65  | 2.82 | 3.47 | 3.00 | 2.54 |
| Down | ENSMUSG00000044408  | -1.14 | 3.07E-05 | Sptssa        | protein_coding | 6.80  | 7.00 | 6.70 | 6.96  | 5.90 | 5.58 | 5.85 | 5.81 |
| Down | ENSMUSG00000056890  | -1.20 | 3.13E-05 | Gad1f         | protein_coding | 4.29  | 4.20 | 4.05 | 4.39  | 3.89 | 3.11 | 3.00 | 3.44 |
| Down | ENSMUSG00000000522  | -1.19 | 3.14E-05 | Iih3          | protein_coding | 6.00  | 6.11 | 5.83 | 6.13  | 4.97 | 5.29 | 4.16 | 5.13 |
| Down | ENSMUSG00000094921  | -3.23 | 3.19E-05 | Vmn2r112      | protein_coding | 4.72  | 4.27 | 4.67 | 4.67  | 2.82 | 2.53 | 2.35 | 2.70 |
| Down | ENSMUSG00000003863  | -3.28 | 3.20E-05 | Ppfia3        | protein_coding | 3.61  | 2.95 | 3.30 | 3.86  | 2.37 | 2.00 | 2.00 | 2.54 |
| Up   | ENSMUSG00000037752  | 1.15  | 3.22E-05 | Kxr8          | protein_coding | 4.22  | 4.53 | 4.87 | 5.00  | 5.89 | 5.77 | 5.64 | 5.54 |
| Down | ENSMUSG00000028294  | -1.80 | 3.23E-05 | Cfap206       | protein_coding | 4.18  | 4.58 | 4.17 | 4.98  | 2.37 | 3.24 | 3.23 | 3.23 |
| Down | ENSMUSG00000037731  | -1.96 | 3.26E-05 | Themis2       | protein_coding | 4.32  | 4.31 | 3.80 | 4.15  | 2.82 | 2.70 | 2.93 | 3.17 |
| Down | ENSMUSG00000062017  | -2.17 | 3.29E-05 | Abca14        | protein_coding | 4.07  | 5.02 | 5.04 | 4.50  | 2.74 | 3.22 | 3.13 | 3.44 |
| Down | ENSMUSG00000050623  | -1.52 | 3.33E-05 | Catsperz      | protein_coding | 4.84  | 4.50 | 4.49 | 4.25  | 3.35 | 3.22 | 3.87 | 3.12 |
| Down | ENSMUSG00000031112  | -1.22 | 3.33E-05 | Stk26         | protein_coding | 5.10  | 5.28 | 5.38 | 5.57  | 4.03 | 4.42 | 3.59 | 4.87 |
| Down | ENSMUSG00000027935  | -1.33 | 3.36E-05 | Rab13         | protein_coding | 5.45  | 5.08 | 5.27 | 5.19  | 4.68 | 3.73 | 3.79 | 4.17 |
| Down | ENSMUSG00000041187  | -1.18 | 3.37E-05 | Prkd2         | protein_coding | 4.80  | 5.06 | 5.26 | 5.20  | 4.10 | 3.80 | 3.40 | 4.77 |
| Down | ENSMUSG00000021965  | -1.72 | 3.38E-05 | Ska3          | protein_coding | 4.03  | 4.31 | 4.68 | 4.80  | 3.50 | 2.98 | 3.00 | 3.48 |
| Down | ENSMUSG00000021187  | -2.32 | 3.52E-05 | Tc2n          | protein_coding | 4.26  | 4.05 | 4.20 | 4.87  | 2.62 | 3.05 | 2.13 | 3.29 |
| Up   | ENSMUSG00000030847  | 1.01  | 3.53E-05 | Bag3          | protein_coding | 6.41  | 5.75 | 5.77 | 5.67  | 7.10 | 6.91 | 6.74 | 6.78 |
| Down | ENSMUSG00000073494  | -5.71 | 3.54E-05 | Str21h2       | protein_coding | 3.99  | 3.68 | 3.70 | 3.65  | 2.00 | 2.00 | 2.00 | 2.24 |
| Down | ENSMUSG00000001685  | -2.32 | 3.63E-05 | Gstl3         | protein_coding | 3.86  | 3.88 | 3.97 | 4.45  | 2.37 | 2.62 | 2.54 | 3.12 |
| Down | ENSMUSG00000000794  | -1.58 | 3.65E-05 | Kcnn3         | protein_coding | 7.62  | 7.68 | 7.67 | 7.99  | 5.12 | 6.51 | 4.97 | 7.15 |
| Down | ENSMUSG00000020424  | -3.39 | 3.66E-05 | Castor1       | protein_coding | 3.61  | 4.05 | 3.23 | 3.08  | 2.00 | 2.00 | 2.00 | 2.78 |
| Down | ENSMUSG00000026922  | -2.13 | 3.71E-05 | Agpat2        | protein_coding | 4.80  | 4.34 | 3.70 | 4.12  | 3.04 | 2.78 | 2.79 | 3.06 |
| Down | ENSMUSG00000030157  | -2.12 | 3.81E-05 | Clec2d        | protein_coding | 4.80  | 5.28 | 4.17 | 4.42  | 2.25 | 2.62 | 4.04 | 3.23 |
| Down | ENSMUSG00000031286  | -3.21 | 3.94E-05 | Glh2d2        | protein_coding | 3.18  | 3.73 | 3.75 | 4.05  | 2.00 | 2.70 | 2.00 | 2.44 |
| Down | ENSMUSG00000036083  | -2.83 | 4.00E-05 | Slc17a3       | protein_coding | 4.11  | 4.34 | 4.37 | 4.65  | 2.25 | 2.93 | 2.62 | 2.93 |
| Down | ENSMUSG00000027463  | -3.70 | 4.03E-05 | Slc52a3       | protein_coding | 3.38  | 3.03 | 3.65 | 3.08  | 2.00 | 2.34 | 2.00 | 2.24 |
| Down | ENSMUSG00000049013  | -2.49 | 4.03E-05 | Prss48        | protein_coding | 3.56  | 3.11 | 3.70 | 2.00  | 2.00 | 2.44 | 2.00 | 2.25 |
| Down | ENSMUSG00000019944  | -1.07 | 4.05E-05 | Rhoblb1       | protein_coding | 5.00  | 5.17 | 5.59 | 4.94  | 4.49 | 4.47 | 3.79 | 4.31 |
| Down | ENSMUSG00000024565  | -2.70 | 4.09E-05 | Sall3         | protein_coding | 5.89  | 6.29 | 5.86 | 6.24  | 4.25 | 3.28 | 2.00 | 4.50 |
| Up   | ENSMUSG00000074793  | 1.19  | 4.10E-05 | Hspa12b       | protein_coding | 4.18  | 3.97 | 4.27 | 4.63  | 5.19 | 4.89 | 5.59 | 5.43 |
| Down | ENSMUSG00000031273  | -2.08 | 4.16E-05 | Hspa12b       | protein_coding | 4.07  | 4.05 | 5.42 | 4.98  | 2.47 | 3.34 | 3.13 | 3.74 |
| Down | ENSMUSG00000095061  | -2.26 | 4.20E-05 | E030018B13Rik | protein_coding | 3.10  | 3.57 | 3.65 | 3.45  | 2.25 | 2.00 | 2.24 | 3.06 |
| Down | ENSMUSG00000042707  | -2.00 | 4.20E-05 | Dnal1         | protein_coding | 5.12  | 4.67 | 4.20 | 5.17  | 3.04 | 3.61 | 2.45 | 3.89 |
| Down | ENSMUSG00000020788  | -1.59 | 4.22E-05 | Atp2a3        | protein_coding | 4.48  | 4.56 | 4.73 | 4.92  | 3.17 | 3.56 | 3.59 | 3.57 |
| Down | ENSMUSG00000038893  | -1.03 | 4.32E-05 | Fam117a       | protein_coding | 5.55  | 5.12 | 5.35 | 5.63  | 4.70 | 4.68 | 3.83 | 4.74 |
| Down | ENSMUSG00000091028  | -3.60 | 4.41E-05 | Gm10722       | protein_coding | 9.31  | 9.88 | 9.51 | 10.17 | 5.66 | 6.42 | 5.11 | 7.02 |
| Down | ENSMUSG00000028369  | -1.10 | 4.43E-05 | Svep1         | protein_coding | 5.47  | 5.76 | 5.05 | 5.52  | 4.28 | 4.27 | 4.63 | 4.79 |
| Down | ENSMUSG00000030125  | -1.60 | 4.48E-05 | Lrrc23        | protein_coding | 4.89  | 4.27 | 4.65 | 5.35  | 3.04 | 3.87 | 3.63 | 3.74 |
| Down | ENSMUSG00000034584  | -2.27 | 4.53E-05 | Exph5         | protein_coding | 5.82  | 6.50 | 5.97 | 6.05  | 3.55 | 4.70 | 2.13 | 4.79 |
| Down | ENSMUSG00000026946  | -1.63 | 4.56E-05 | Nmi           | protein_coding | 4.77  | 5.17 | 5.02 | 4.92  | 3.96 | 3.98 | 2.45 | 3.89 |
| Down | ENSMUSG00000033777  | -3.47 | 4.58E-05 | Tlr13         | protein_coding | 4.62  | 3.11 | 4.43 | 4.15  | 2.00 | 2.00 | 2.00 | 2.62 |
| Down | ENSMUSG00000071317  | -1.77 | 4.63E-05 | Bves          | protein_coding | 5.50  | 5.38 | 5.13 | 5.33  | 4.34 | 2.53 | 4.54 | 3.29 |
| Down | ENSMUSG00000035403  | -1.38 | 4.63E-05 | Orb2          | protein_coding | 5.65  | 5.38 | 5.05 | 5.49  | 4.76 | 4.24 | 3.07 | 4.38 |
| Down | ENSMUSG000000047090 | -1.12 | 4.64E-05 | Tmem198b      | protein_coding | 5.29  | 5.41 | 5.95 | 5.38  | 4.42 | 4.52 | 3.90 | 5.13 |
| Down | ENSMUSG00000001020  | -3.67 |          |               |                |       |      |      |       |      |      |      |      |

|      |                     |       |          |               |                |      |      |      |      |      |      |      |      |
|------|---------------------|-------|----------|---------------|----------------|------|------|------|------|------|------|------|------|
| Up   | ENSMUSG00000028318  | 1.21  | 4.93E-05 | Polr1e        | protein_coding | 4.95 | 5.02 | 5.19 | 5.14 | 5.95 | 6.56 | 6.38 | 5.66 |
| Down | ENSMUSG00000020377  | -2.58 | 4.95E-05 | Ltc4s         | protein_coding | 3.86 | 3.57 | 3.93 | 4.55 | 3.45 | 2.34 | 2.00 | 2.12 |
| Down | ENSMUSG00000034520  | -1.67 | 4.97E-05 | Gjc1          | protein_coding | 4.62 | 4.89 | 4.75 | 5.52 | 3.91 | 3.24 | 3.67 | 3.92 |
| Down | ENSMUSG00000019232  | -1.43 | 5.00E-05 | Etnppl        | protein_coding | 6.85 | 6.84 | 6.27 | 5.46 | 5.30 | 5.24 | 5.27 | 4.63 |
| Down | ENSMUSG00000026567  | -1.70 | 5.01E-05 | Adcy10        | protein_coding | 4.59 | 5.17 | 5.38 | 5.53 | 3.64 | 4.01 | 2.86 | 4.38 |
| Down | ENSMUSG000000091844 | -2.18 | 5.03E-05 | Gm8251        | protein_coding | 4.75 | 4.44 | 4.93 | 5.31 | 3.55 | 2.62 | 2.71 | 3.85 |
| Down | ENSMUSG000000195600 | -2.36 | 5.14E-05 | Adora2b       | protein_coding | 3.95 | 4.64 | 4.60 | 4.65 | 2.46 | 3.40 | 3.12 | 3.12 |
| Down | ENSMUSG00000035473  | -1.55 | 5.22E-05 | Gaim          | protein_coding | 4.82 | 4.24 | 4.57 | 4.78 | 3.40 | 3.61 | 3.24 | 3.57 |
| Down | ENSMUSG00000029735  | -1.93 | 5.25E-05 | Tpk1          | protein_coding | 4.11 | 4.61 | 4.95 | 4.91 | 3.69 | 3.11 | 2.00 | 3.74 |
| Down | ENSMUSG00000049580  | -2.74 | 5.26E-05 | Tsku          | protein_coding | 3.86 | 3.88 | 2.84 | 3.78 | 2.00 | 2.44 | 2.24 | 2.99 |
| Down | ENSMUSG00000029005  | -2.00 | 5.28E-05 | Draxin        | protein_coding | 4.15 | 4.27 | 4.20 | 4.45 | 2.82 | 2.34 | 3.13 | 3.39 |
| Down | ENSMUSG00000002104  | -5.78 | 5.32E-05 | Rapsn         | protein_coding | 2.43 | 3.46 | 3.01 | 2.69 | 2.00 | 2.00 | 2.00 | 2.00 |
| Down | ENSMUSG00000025038  | -1.73 | 5.38E-05 | Efhc2         | protein_coding | 4.36 | 4.27 | 4.30 | 4.91 | 3.17 | 3.28 | 3.13 | 3.44 |
| Down | ENSMUSG00000034023  | -1.78 | 5.43E-05 | Fancd2        | protein_coding | 5.64 | 5.47 | 5.78 | 5.89 | 4.66 | 3.91 | 2.24 | 4.75 |
| Down | ENSMUSG00000019952  | -1.13 | 5.58E-05 | Poc1b         | protein_coding | 5.94 | 6.07 | 6.32 | 6.30 | 5.49 | 4.74 | 4.13 | 5.67 |
| Down | ENSMUSG00000032089  | -1.12 | 5.60E-05 | Il10ra        | protein_coding | 5.12 | 5.41 | 5.64 | 5.33 | 4.16 | 4.74 | 4.88 | 3.48 |
| Down | ENSMUSG00000079418  | -1.37 | 5.62E-05 | Atg4a         | protein_coding | 4.36 | 4.79 | 5.27 | 5.31 | 3.89 | 3.84 | 3.83 | 3.95 |
| Down | ENSMUSG00000047632  | -1.26 | 5.71E-05 | Fgfbp3        | protein_coding | 4.72 | 4.72 | 5.13 | 4.65 | 3.64 | 4.13 | 3.87 | 3.57 |
| Down | ENSMUSG000000021871 | -2.18 | 5.79E-05 | Gm49342       | protein_coding | 4.59 | 4.84 | 5.15 | 5.09 | 2.26 | 3.65 | 2.63 | 3.99 |
| Down | ENSMUSG00000050423  | -2.95 | 6.05E-05 | Pcp1r3g       | protein_coding | 5.17 | 5.41 | 5.38 | 5.09 | 2.65 | 2.00 | 4.19 | 2.44 |
| Down | ENSMUSG00000074824  | -1.59 | 6.08E-05 | Rlican18      | protein_coding | 5.08 | 5.04 | 4.80 | 4.92 | 3.11 | 3.63 | 4.25 | 3.63 |
| Down | ENSMUSG00000038304  | -2.18 | 6.15E-05 | Cd160         | protein_coding | 3.56 | 4.27 | 3.65 | 3.82 | 3.29 | 2.34 | 2.00 | 2.70 |
| Down | ENSMUSG00000029595  | -6.20 | 6.18E-05 | Lhx5          | protein_coding | 3.44 | 2.43 | 3.23 | 3.33 | 2.00 | 2.00 | 2.00 | 2.00 |
| Down | ENSMUSG00000024909  | -1.04 | 6.22E-05 | Efemp2        | protein_coding | 5.55 | 5.64 | 5.34 | 5.59 | 3.89 | 4.54 | 4.95 | 4.87 |
| Down | ENSMUSG00000079001  | -3.32 | 6.27E-05 | 4930404H24Rik | protein_coding | 3.10 | 3.19 | 3.16 | 2.94 | 2.00 | 2.00 | 2.54 | 2.40 |
| Down | ENSMUSG00000027510  | -1.87 | 6.27E-05 | Rbm38         | protein_coding | 4.51 | 4.20 | 3.84 | 4.45 | 3.29 | 3.11 | 2.13 | 3.34 |
| Down | ENSMUSG00000028836  | -1.91 | 6.33E-05 | Slc30a2       | protein_coding | 4.82 | 4.72 | 4.24 | 4.70 | 2.57 | 2.44 | 4.05 | 4.70 |
| Down | ENSMUSG00000020216  | -1.87 | 6.38E-05 | Jrsp1         | protein_coding | 4.51 | 4.58 | 4.68 | 4.70 | 2.66 | 2.98 | 2.63 | 4.17 |
| Down | ENSMUSG00000035435  | -1.54 | 6.43E-05 | Abca17        | protein_coding | 4.87 | 4.82 | 4.78 | 4.63 | 3.35 | 3.38 | 3.00 | 4.25 |
| Down | ENSMUSG00000049103  | -3.35 | 6.45E-05 | Ccr2          | protein_coding | 4.15 | 4.69 | 4.46 | 4.37 | 2.13 | 2.12 | 2.54 | 3.06 |
| Down | ENSMUSG00000040919  | -4.39 | 6.74E-05 | 4930505A04Rik | protein_coding | 3.91 | 3.03 | 3.70 | 3.39 | 2.00 | 2.00 | 2.13 | 2.34 |
| Down | ENSMUSG00000028339  | -1.26 | 6.79E-05 | Col15a1       | protein_coding | 4.93 | 5.00 | 5.45 | 5.35 | 3.69 | 3.77 | 4.19 | 4.70 |
| Down | ENSMUSG00000031752  | -1.59 | 6.82E-05 | Il4l1         | protein_coding | 5.08 | 4.51 | 4.53 | 4.19 | 3.25 | 2.78 | 3.55 | 3.35 |
| Down | ENSMUSG000000103258 | -2.27 | 6.85E-05 | Ilf55         | protein_coding | 3.99 | 3.92 | 3.23 | 2.13 | 2.92 | 3.82 | 2.71 | 2.78 |
| Down | ENSMUSG00000027931  | -1.91 | 6.89E-05 | Npr1          | protein_coding | 4.39 | 4.53 | 5.35 | 5.24 | 2.97 | 3.22 | 3.13 | 4.20 |
| Down | ENSMUSG00000074340  | -1.56 | 6.96E-05 | Ovgp1         | protein_coding | 4.72 | 4.01 | 4.85 | 4.28 | 3.81 | 2.98 | 3.07 | 3.48 |
| Down | ENSMUSG00000114487  | -5.51 | 7.07E-05 | Gm49393       | protein_coding | 3.86 | 3.03 | 2.84 | 2.69 | 2.00 | 2.00 | 2.00 | 2.12 |
| Down | ENSMUSG00000036545  | -1.00 | 7.10E-05 | Adams2        | protein_coding | 6.80 | 6.40 | 6.22 | 6.16 | 5.77 | 4.66 | 5.71 | 5.54 |
| Down | ENSMUSG00000026547  | -1.04 | 7.11E-05 | Tagln2        | protein_coding | 5.06 | 5.23 | 5.38 | 4.92 | 4.76 | 3.84 | 4.10 | 4.25 |
| Up   | ENSMUSG00000074811  | 1.10  | 7.17E-05 | Hps6          | protein_coding | 5.10 | 4.79 | 5.38 | 5.11 | 5.86 | 6.09 | 6.53 | 5.87 |
| Down | ENSMUSG00000069378  | -2.68 | 7.21E-05 | Prdm6         | protein_coding | 3.72 | 4.05 | 3.01 | 4.19 | 2.82 | 2.44 | 2.00 | 2.54 |
| Down | ENSMUSG00000015839  | -1.02 | 7.27E-05 | Nfe2l2        | protein_coding | 6.20 | 5.98 | 5.46 | 6.18 | 5.44 | 5.34 | 4.40 | 4.83 |
| Down | ENSMUSG00000068114  | -1.09 | 7.48E-05 | Ccdc134       | protein_coding | 5.64 | 5.60 | 5.48 | 5.63 | 5.06 | 4.44 | 4.16 | 4.70 |
| Down | ENSMUSG00000063681  | -1.86 | 7.54E-05 | Crb1          | protein_coding | 5.00 | 4.69 | 5.09 | 5.09 | 4.98 | 4.13 | 3.70 | 4.70 |
| Up   | ENSMUSG00000047953  | 1.66  | 7.58E-05 | Gp5           | protein_coding | 3.38 | 3.97 | 3.97 | 3.74 | 5.55 | 4.19 | 5.07 | 5.35 |
| Down | ENSMUSG00000060603  | -1.12 | 7.76E-05 | 1110032F04Rik | protein_coding | 5.80 | 5.97 | 5.64 | 5.53 | 4.95 | 3.65 | 5.10 | 4.88 |
| Down | ENSMUSG00000027932  | -5.12 | 7.89E-05 | Icos          | protein_coding | 3.72 | 3.88 | 3.36 | 2.12 | 2.00 | 2.24 | 2.00 | 2.24 |
| Up   | ENSMUSG00000029314  | 1.22  | 7.89E-05 | Gpai3         | protein_coding | 5.17 | 4.89 | 4.87 | 5.30 | 6.43 | 5.95 | 6.05 | 6.27 |
| Down | ENSMUSG00000046317  | -5.13 | 7.99E-05 | BC107364      | protein_coding | 2.85 | 2.95 | 2.54 | 2.27 | 2.00 | 2.00 | 2.00 | 2.00 |
| Down | ENSMUSG00000022667  | -3.95 | 8.06E-05 | Cd200r1       | protein_coding | 3.56 | 3.11 | 3.84 | 3.21 | 2.00 | 2.00 | 2.00 | 2.54 |
| Down | ENSMUSG00000033826  | -1.10 | 8.10E-05 | Dnah8         | protein_coding | 5.74 | 6.11 | 5.83 | 6.33 | 5.04 | 5.24 | 4.35 | 5.28 |
| Down | ENSMUSG00000029155  | -1.95 | 8.24E-05 | Spata18       | protein_coding | 3.77 | 4.34 | 4.52 | 5.58 | 3.29 | 2.98 | 3.24 | 3.57 |
| Down | ENSMUSG00000086022  | -1.65 | 8.38E-05 | Rad51ap2      | protein_coding | 4.32 | 4.41 | 4.40 | 3.86 | 2.47 | 2.53 | 3.94 | 3.12 |
| Down | ENSMUSG00000029530  | -2.58 | 8.53E-05 | Ccr9          | protein_coding | 5.17 | 5.04 | 4.40 | 4.67 | 2.13 | 2.00 | 2.93 | 4.05 |
| Down | ENSMUSG00000034333  | -1.23 | 8.59E-05 | Zbed4         | protein_coding | 5.82 | 6.00 | 5.26 | 5.85 | 4.36 | 3.84 | 5.39 | 4.63 |
| Down | ENSMUSG00000022906  | -1.32 | 8.89E-05 | Parp9         | protein_coding | 5.10 | 5.44 | 5.35 | 5.38 | 3.45 | 4.24 | 4.24 | 4.63 |
| Down | ENSMUSG00000028609  | -1.88 | 8.90E-05 | Ush2a         | protein_coding | 5.70 | 5.59 | 5.32 | 5.77 | 2.98 | 4.43 | 4.43 | 4.61 |
| Down | ENSMUSG00000033177  | -2.39 | 8.98E-05 | Tmprss7       | protein_coding | 4.29 | 5.14 | 4.57 | 4.25 | 3.17 | 3.13 | 3.23 | 3.23 |
| Down | ENSMUSG0000006018   | -2.15 | 8.99E-05 | Alox5ap       | protein_coding | 4.95 | 4.86 | 4.54 | 4.65 | 2.16 | 2.92 | 2.13 | 3.06 |
| Up   | ENSMUSG00000020732  | 1.85  | 9.00E-05 | Rab37         | protein_coding | 3.95 | 4.56 | 4.43 | 4.48 | 5.84 | 6.45 | 5.80 | 5.84 |
| Down | ENSMUSG00000073975  | -2.33 | 9.02E-05 | Olfir50       | protein_coding | 4.42 | 5.30 | 4.91 | 4.67 | 2.00 | 3.28 | 3.63 | 3.29 |
| Down | ENSMUSG00000074569  | -1.89 | 9.03E-05 | Gcnt7         | protein_coding | 3.38 | 3.63 | 4.01 | 3.45 | 2.37 | 2.98 | 2.24 | 2.85 |
| Down | ENSMUSG00000092511  | -1.10 | 9.05E-05 | Gm20547       | protein_coding | 5.60 | 5.76 | 5.93 | 5.86 | 4.47 | 5.38 | 4.45 | 4.72 |
| Down | ENSMUSG00000043873  | -3.22 | 9.12E-05 | Chi5          | protein_coding | 3.25 | 3.57 | 3.43 | 3.45 | 2.00 | 2.00 | 2.00 | 2.78 |
| Down | ENSMUSG00000023484  | -1.83 | 9.12E-05 | Prph          | protein_coding | 3.56 | 4.69 | 4.09 | 3.98 | 2.47 | 3.38 | 2.93 | 2.92 |
| Down | ENSMUSG00000070390  | -1.86 | 9.15E-05 | Nlrp1b        | protein_coding | 4.70 | 5.26 | 4.68 | 4.45 | 2.97 | 2.70 | 3.97 | 3.62 |
| Down | ENSMUSG00000032807  | -1.51 | 9.17E-05 | Alox12b       | protein_coding | 5.41 | 5.15 | 5.50 | 4.94 | 2.74 | 4.44 | 4.22 | 5.11 |
| Down | ENSMUSG00000048905  | -1.14 | 9.17E-05 | 4930539E08Rik | protein_coding | 5.26 | 5.83 | 5.72 | 5.94 | 4.16 | 4.42 | 4.71 | 4.24 |
| Down | ENSMUSG00000019892  | -1.03 | 9.36E-05 | Lrric1        | protein_coding | 5.75 | 5.58 | 5.70 | 6.12 | 5.09 | 4.60 | 4.07 | 5.42 |
| Down | ENSMUSG00000028599  | -1.87 | 9.40E-05 | Tnfrsf1b      | protein_coding | 5.24 | 4.86 | 4.17 | 4.67 | 3.77 | 2.62 | 2.63 | 3.99 |
| Down | ENSMUSG00000038725  | -1.65 | 9.47E-05 | Pkhd111       | protein_coding | 5.50 | 5.96 | 5.72 | 5.35 | 3.35 | 4.78 | 3.19 | 4.88 |
| Down | ENSMUSG00000056018  | -2.95 | 9.49E-05 | Ccdc7b        | protein_coding | 3.95 | 3.39 | 3.30 | 3.78 | 2.00 | 2.62 | 2.13 | 2.54 |
| Down | ENSMUSG00000019804  | -2.57 | 9.55E-05 | Dsg4          | protein_coding | 4.54 | 4.50 | 4.64 | 4.60 | 2.13 | 3.86 | 3.23 | 3.23 |
| Down | ENSMUSG00000079235  | -1.05 | 9.55E-05 | Ccdc13        | protein_coding | 5.48 | 5.80 | 5.98 | 5.64 | 6.08 | 5.64 | 4.43 | 4.92 |
| Down | ENSMUSG00000035299  | -1.21 | 9.57E-05 | Mid1          | protein_coding | 5.41 | 6.12 | 5.83 | 6.18 | 4.59 | 4.99 | 4.33 | 5.24 |
| Up   | ENSMUSG00000033213  | 1.06  | 9.66E-05 | Tmem266       | protein_coding | 5.08 | 5.25 | 4.52 | 5.40 | 6.56 | 6.03 | 5.56 | 5.95 |
| Down | ENSMUSG00000036826  | -2.61 | 9.71E-05 | Igfr1         | protein_coding | 3.61 | 3.11 | 3.16 | 3.08 | 2.00 | 2.35 | 2.00 | 2.78 |
| Down | ENSMUSG00000074847  | -3.97 | 9.85E-05 | Gm10775       | protein_coding | 3.18 | 3.39 | 3.65 | 2.77 | 2.00 | 2.44 | 2.00 | 2.00 |
| Down | ENSMUSG00000042596  | -2.38 | 9.89E-05 | Tfap2d        | protein_coding | 3.91 | 4.24 | 3.60 | 4.25 | 2.00 | 2.70 | 2.35 | 3.29 |
| Down | ENSMUSG00000017499  | -2.21 | 9.89E-05 | Cdc6          | protein_coding | 3.44 | 3.73 | 3.80 | 4.09 | 2.82 | 2.34 | 2.45 | 2.78 |
| Down | ENSMUSG00000040584  | -1.15 | 9.96E-05 | Abcb1a        | protein_coding | 4.98 | 5.12 | 4.80 | 5.30 | 4.31 | 3.52 | 4.52 | 3.89 |
| Down | ENSMUSG00000022952  | -2.06 | 1.00E-04 | Runx1         | protein_coding | 5.83 | 5.89 | 5.52 | 5.22 | 4.92 | 3.61 | 2.24 | 3.70 |
| Down | ENSMUSG00000048572  | -1.88 | 1.01E-04 | Tmem252       | protein_coding | 5.24 | 5.55 | 4.20 | 4.53 | 3.64 | 3.94 | 2.63 | 3.50 |
| Down | ENSMUSG00000109864  | -2.44 | 1.02E-04 | Eid3          | protein_coding | 3.56 | 2.86 | 4.01 | 3.39 | 2.00 | 2.70 | 2.79 | 2.00 |
| Down | ENSMUSG00000049093  | -4.39 | 1.04E-04 | Il23r         | protein_coding | 3.61 | 4.13 | 2.64 | 3.39 | 2.00 | 2.24 | 2.00 | 2.24 |
| Down | ENSMUSG00000017897  | -1.64 | 1.04E-04 | Eys2          | protein_coding | 5.00 | 5.28 | 5.04 | 4.72 | 4.13 | 4.13 | 3.24 | 4.31 |
| Down | ENSMUSG00000032499  | -1.11 | 1.05E-04 | Mym1          | protein_coding | 5.44 | 5.36 | 5.43 | 5.57 | 3.89 | 4.51 | 4.30 | 5.02 |
| Down | ENSM                |       |          |               |                |      |      |      |      |      |      |      |      |

|      |                    |       |          |               |                |      |      |      |      |      |      |      |      |
|------|--------------------|-------|----------|---------------|----------------|------|------|------|------|------|------|------|------|
| Down | ENSMUSG00000016995 | -1.25 | 1.12E-04 | Matn4         | protein_coding | 5.86 | 6.36 | 5.32 | 5.76 | 5.11 | 3.87 | 4.77 | 4.97 |
| Up   | ENSMUSG00000035946 | 3.45  | 1.13E-04 | Gsx2          | protein_coding | 2.16 | 2.16 | 2.93 | 2.59 | 4.56 | 4.47 | 4.77 | 3.89 |
| Down | ENSMUSG00000034164 | -1.72 | 1.13E-04 | Emid1         | protein_coding | 4.95 | 4.74 | 4.43 | 4.37 | 3.64 | 2.12 | 3.83 | 3.39 |
| Down | ENSMUSG00000015880 | -1.21 | 1.13E-04 | Ncapg         | protein_coding | 5.21 | 5.50 | 5.69 | 5.84 | 3.73 | 4.22 | 5.00 | 4.79 |
| Down | ENSMUSG00000056204 | -1.20 | 1.13E-04 | Ppgep1        | protein_coding | 6.46 | 6.17 | 5.87 | 5.69 | 6.36 | 4.24 | 4.77 | 5.03 |
| Down | ENSMUSG00000072878 | -4.16 | 1.14E-04 | 1700123L14Rik | protein_coding | 2.30 | 3.52 | 3.54 | 2.94 | 2.00 | 2.00 | 2.00 | 2.34 |
| Down | ENSMUSG00000037661 | -2.36 | 1.14E-04 | Gpr100        | protein_coding | 3.99 | 4.05 | 4.37 | 4.32 | 2.29 | 2.29 | 2.00 | 3.48 |
| Down | ENSMUSG00000021835 | -1.85 | 1.14E-04 | Bmp4          | protein_coding | 4.57 | 4.20 | 4.43 | 4.55 | 3.23 | 2.34 | 2.93 | 3.78 |
| Down | ENSMUSG00000036880 | -1.24 | 1.17E-04 | Acaa2         | protein_coding | 6.28 | 6.29 | 5.91 | 6.85 | 5.07 | 5.39 | 5.00 | 5.38 |
| Down | ENSMUSG00000060176 | -1.33 | 1.18E-04 | Kif27         | protein_coding | 6.10 | 5.76 | 5.55 | 6.36 | 5.49 | 4.72 | 3.54 | 4.75 |
| Down | ENSMUSG00000092086 | -2.60 | 1.20E-04 | Gm6793        | protein_coding | 3.10 | 3.11 | 3.16 | 3.27 | 2.13 | 2.53 | 2.13 | 2.24 |
| Down | ENSMUSG00000018727 | -2.14 | 1.20E-04 | Cpsf4l        | protein_coding | 3.31 | 4.05 | 4.05 | 3.45 | 3.40 | 2.98 | 2.00 | 2.12 |
| Down | ENSMUSG00000006724 | -2.12 | 1.23E-04 | Cyp27b1       | protein_coding | 3.25 | 3.88 | 3.97 | 3.98 | 2.66 | 2.53 | 2.35 | 2.99 |
| Down | ENSMUSG00000020844 | -1.46 | 1.23E-04 | Nxn           | protein_coding | 6.46 | 6.57 | 6.00 | 6.53 | 4.88 | 5.48 | 3.50 | 5.60 |
| Down | ENSMUSG00000050762 | -5.37 | 1.24E-04 | Prss27        | protein_coding | 2.94 | 2.95 | 2.42 | 2.69 | 2.00 | 2.00 | 2.00 | 2.00 |
| Down | ENSMUSG00000079466 | -2.75 | 1.24E-04 | Prdm12        | protein_coding | 4.45 | 4.47 | 4.24 | 4.85 | 2.25 | 2.70 | 2.63 | 3.29 |
| Down | ENSMUSG00000051354 | -2.52 | 1.24E-04 | Samd3         | protein_coding | 4.32 | 3.97 | 4.20 | 4.31 | 2.00 | 3.22 | 2.00 | 2.00 |
| Down | ENSMUSG00000074825 | -1.97 | 1.24E-04 | Itprl1        | protein_coding | 4.39 | 4.67 | 4.80 | 5.09 | 2.66 | 3.38 | 3.24 | 3.74 |
| Down | ENSMUSG00000031980 | -1.74 | 1.24E-04 | Ag1           | protein_coding | 5.81 | 5.92 | 5.92 | 6.06 | 4.06 | 4.37 | 3.35 | 5.20 |
| Down | ENSMUSG00000029286 | -3.33 | 1.25E-04 | Enam          | protein_coding | 4.03 | 4.20 | 4.49 | 4.49 | 2.25 | 2.34 | 2.00 | 3.17 |
| Down | ENSMUSG00000042501 | -2.97 | 1.25E-04 | Cpa6          | protein_coding | 4.62 | 4.84 | 4.34 | 4.50 | 2.70 | 3.00 | 2.70 | 3.00 |
| Down | ENSMUSG00000060084 | -5.91 | 1.26E-04 | Olfir148      | protein_coding | 3.44 | 3.63 | 3.09 | 3.45 | 2.00 | 2.00 | 2.00 | 2.12 |
| Down | ENSMUSG00000074619 | -4.62 | 1.26E-04 | 1700034I23Rik | protein_coding | 2.54 | 2.95 | 3.43 | 3.27 | 2.00 | 2.00 | 2.00 | 2.24 |
| Down | ENSMUSG00000019848 | -1.47 | 1.26E-04 | Popdc3        | protein_coding | 5.28 | 5.38 | 4.57 | 5.14 | 3.96 | 3.38 | 4.40 | 3.74 |
| Down | ENSMUSG00000046879 | -1.17 | 1.26E-04 | Irgm1         | protein_coding | 5.15 | 5.59 | 5.52 | 5.12 | 4.52 | 4.27 | 3.83 | 4.68 |
| Down | ENSMUSG00000034833 | -2.32 | 1.28E-04 | Tespa1        | protein_coding | 4.18 | 3.97 | 4.80 | 4.58 | 2.97 | 2.85 | 2.79 | 2.99 |
| Down | ENSMUSG00000038146 | -1.14 | 1.29E-04 | Notch3        | protein_coding | 5.00 | 5.21 | 5.69 | 5.42 | 3.96 | 4.01 | 4.04 | 5.13 |
| Down | ENSMUSG00000049372 | -3.92 | 1.30E-04 | Olfir1183     | protein_coding | 4.84 | 4.44 | 4.52 | 4.91 | 2.00 | 2.62 | 2.00 | 2.92 |
| Down | ENSMUSG00000075307 | -3.76 | 1.30E-04 | Klh41         | protein_coding | 3.10 | 2.95 | 3.65 | 3.55 | 2.00 | 2.00 | 2.00 | 2.54 |
| Down | ENSMUSG00000042282 | -2.63 | 1.30E-04 | Gucy2f        | protein_coding | 4.36 | 4.41 | 4.49 | 4.58 | 2.66 | 2.78 | 2.00 | 3.39 |
| Down | ENSMUSG00000057058 | -1.81 | 1.30E-04 | Skap1         | protein_coding | 5.10 | 5.21 | 5.22 | 4.87 | 3.60 | 3.43 | 3.35 | 4.14 |
| Down | ENSMUSG00000035021 | -1.05 | 1.31E-04 | Baz1a         | protein_coding | 4.89 | 5.25 | 5.19 | 5.41 | 3.81 | 4.37 | 3.63 | 4.98 |
| Down | ENSMUSG00000047990 | -2.68 | 1.32E-04 | C22orf44      | protein_coding | 3.72 | 3.57 | 3.57 | 3.45 | 2.70 | 2.53 | 2.24 | 2.62 |
| Down | ENSMUSG00000054598 | -2.40 | 1.32E-04 | 913020L23Rik  | protein_coding | 4.20 | 4.20 | 4.01 | 4.98 | 2.74 | 3.03 | 3.06 | 3.06 |
| Down | ENSMUSG00000000216 | -3.61 | 1.33E-04 | Scmn1g        | protein_coding | 4.32 | 3.73 | 3.36 | 4.05 | 2.00 | 2.12 | 2.24 | 2.70 |
| Down | ENSMUSG00000071547 | -1.66 | 1.33E-04 | Nl5dc2        | protein_coding | 5.36 | 5.14 | 5.14 | 5.42 | 4.68 | 2.70 | 3.97 | 4.23 |
| Down | ENSMUSG00000098715 | -5.18 | 1.34E-04 | Gm28053       | protein_coding | 3.31 | 3.03 | 2.84 | 2.77 | 2.00 | 2.00 | 2.13 | 2.00 |
| Down | ENSMUSG00000056824 | -3.64 | 1.34E-04 | Zfp663        | protein_coding | 3.44 | 3.26 | 3.43 | 3.60 | 2.00 | 2.24 | 2.44 | 2.44 |
| Down | ENSMUSG00000029994 | -1.55 | 1.34E-04 | Anxa4         | protein_coding | 4.54 | 5.21 | 4.87 | 4.89 | 3.35 | 2.98 | 4.13 | 3.95 |
| Down | ENSMUSG00000068587 | -1.96 | 1.35E-04 | Mgam          | protein_coding | 5.69 | 5.74 | 5.95 | 5.63 | 3.64 | 4.60 | 3.54 | 4.25 |
| Down | ENSMUSG00000030798 | -2.53 | 1.36E-04 | Cd37          | protein_coding | 4.32 | 4.34 | 4.17 | 4.12 | 3.17 | 2.00 | 2.13 | 3.17 |
| Down | ENSMUSG00000037469 | -2.00 | 1.36E-04 | Acp7          | protein_coding | 3.81 | 4.37 | 4.46 | 4.42 | 2.93 | 2.98 | 2.93 | 3.53 |
| Down | ENSMUSG00000025504 | -1.73 | 1.36E-04 | Eps8l2        | protein_coding | 5.26 | 4.72 | 4.80 | 5.22 | 2.82 | 4.30 | 2.86 | 4.02 |
| Down | ENSMUSG00000037375 | -1.23 | 1.36E-04 | Hhat          | protein_coding | 4.67 | 4.95 | 4.73 | 5.02 | 3.96 | 3.80 | 3.30 | 4.25 |
| Down | ENSMUSG00000018604 | -1.65 | 1.37E-04 | Tbx3          | protein_coding | 4.29 | 3.88 | 4.34 | 4.42 | 3.55 | 2.78 | 2.54 | 3.44 |
| Down | ENSMUSG00000060445 | -1.25 | 1.38E-04 | Sycp2         | protein_coding | 4.29 | 4.64 | 4.63 | 4.58 | 4.16 | 2.70 | 3.07 | 3.99 |
| Down | ENSMUSG00000114432 | -3.77 | 1.40E-04 | Gm49391       | protein_coding | 4.72 | 4.37 | 3.84 | 3.78 | 2.00 | 2.00 | 3.06 | 2.00 |
| Up   | ENSMUSG00000092094 | 1.19  | 1.42E-04 | Zfp804b       | protein_coding | 4.18 | 5.17 | 4.80 | 5.24 | 5.66 | 5.91 | 5.89 | 6.38 |
| Down | ENSMUSG00000044957 | -2.27 | 1.43E-04 | Pp2d1         | protein_coding | 3.56 | 3.19 | 3.54 | 3.33 | 2.74 | 2.00 | 2.54 | 2.34 |
| Down | ENSMUSG00000050621 | -1.92 | 1.43E-04 | Rps27rt       | protein_coding | 3.10 | 3.03 | 2.93 | 3.45 | 2.47 | 2.24 | 2.54 | 2.34 |
| Down | ENSMUSG00000028862 | -1.23 | 1.43E-04 | Map3k6        | protein_coding | 5.08 | 5.02 | 5.22 | 5.27 | 4.47 | 3.65 | 3.45 | 4.59 |
| Up   | ENSMUSG00000024430 | 1.03  | 1.44E-04 | Cabyr         | protein_coding | 5.53 | 5.77 | 5.27 | 5.50 | 5.59 | 7.27 | 6.31 | 6.27 |
| Down | ENSMUSG00000015652 | -4.26 | 1.44E-04 | Steap1        | protein_coding | 3.38 | 3.19 | 3.09 | 3.98 | 2.00 | 2.24 | 2.00 | 2.24 |
| Down | ENSMUSG00000024206 | -1.91 | 1.44E-04 | Rfx2          | protein_coding | 5.53 | 5.23 | 4.82 | 5.12 | 3.89 | 2.70 | 2.35 | 4.61 |
| Down | ENSMUSG00000020200 | -2.63 | 1.45E-04 | Usp44         | protein_coding | 3.38 | 3.68 | 3.49 | 3.78 | 2.57 | 2.62 | 2.13 | 2.24 |
| Down | ENSMUSG0000001225  | -2.47 | 1.45E-04 | Slc26a3       | protein_coding | 3.67 | 4.09 | 4.20 | 4.74 | 2.74 | 2.53 | 2.45 | 3.12 |
| Down | ENSMUSG00000023336 | -2.85 | 1.46E-04 | Wfdc1         | protein_coding | 3.91 | 3.97 | 3.84 | 3.23 | 2.34 | 2.34 | 2.00 | 4.28 |
| Down | ENSMUSG00000033053 | -2.15 | 1.46E-04 | 1700028P14Rik | protein_coding | 3.72 | 4.31 | 3.16 | 2.66 | 2.62 | 2.62 | 2.86 | 2.70 |
| Down | ENSMUSG00000044122 | -1.59 | 1.46E-04 | Procr1        | protein_coding | 4.98 | 4.93 | 4.58 | 5.38 | 4.03 | 2.70 | 4.61 | 3.66 |
| Down | ENSMUSG00000049999 | -1.15 | 1.46E-04 | Ppp1r3d       | protein_coding | 4.84 | 5.06 | 5.55 | 5.20 | 4.66 | 3.84 | 4.54 | 3.57 |
| Down | ENSMUSG00000047025 | -4.53 | 1.48E-04 | Cscr1         | protein_coding | 4.32 | 3.63 | 3.09 | 3.09 | 2.00 | 2.24 | 2.00 | 2.34 |
| Down | ENSMUSG00000028480 | -1.94 | 1.48E-04 | Glipr2        | protein_coding | 4.84 | 4.17 | 4.82 | 4.02 | 3.73 | 3.28 | 2.00 | 3.12 |
| Down | ENSMUSG00000033268 | -1.43 | 1.48E-04 | Duox1         | protein_coding | 4.32 | 3.83 | 4.01 | 4.48 | 2.57 | 3.61 | 3.24 | 3.23 |
| Down | ENSMUSG00000025877 | -1.70 | 1.49E-04 | Hk3           | protein_coding | 4.07 | 4.05 | 3.89 | 3.82 | 2.66 | 2.85 | 2.45 | 3.48 |
| Down | ENSMUSG00000071551 | -3.21 | 1.52E-04 | Akr1c19       | protein_coding | 3.61 | 4.13 | 3.93 | 4.19 | 2.37 | 2.24 | 2.13 | 2.78 |
| Down | ENSMUSG00000029096 | -1.29 | 1.52E-04 | Htra3         | protein_coding | 4.54 | 5.14 | 5.26 | 4.82 | 4.13 | 3.61 | 4.13 | 3.74 |
| Down | ENSMUSG00000029027 | -1.04 | 1.52E-04 | Dffb          | protein_coding | 4.80 | 5.40 | 5.89 | 5.04 | 4.47 | 4.74 | 4.24 | 4.25 |
| Down | ENSMUSG00000038872 | -1.03 | 1.55E-04 | Zfx3          | protein_coding | 7.62 | 7.77 | 5.83 | 7.79 | 6.01 | 7.15 | 6.01 | 7.29 |
| Down | ENSMUSG00000089943 | -1.78 | 1.56E-04 | Ugt1a5        | protein_coding | 5.23 | 5.15 | 5.35 | 5.22 | 3.50 | 4.44 | 3.24 | 3.66 |
| Up   | ENSMUSG00000035223 | 1.32  | 1.57E-04 | Hhat          | protein_coding | 4.70 | 5.43 | 4.82 | 6.28 | 5.98 | 6.82 | 6.18 | 6.18 |
| Down | ENSMUSG00000047227 | -1.08 | 1.63E-04 | Gm527         | protein_coding | 5.55 | 5.50 | 5.88 | 5.82 | 4.16 | 5.36 | 4.71 | 4.43 |
| Down | ENSMUSG00000025058 | -5.39 | 1.66E-04 | 5430427O19Rik | protein_coding | 3.50 | 3.73 | 3.43 | 3.50 | 2.00 | 2.00 | 2.00 | 2.24 |
| Down | ENSMUSG00000049221 | -2.13 | 1.69E-04 | Rass9f        | protein_coding | 4.84 | 5.23 | 4.30 | 4.62 | 3.96 | 3.43 | 3.62 | 3.62 |
| Down | ENSMUSG00000032113 | -2.01 | 1.69E-04 | Chk1          | protein_coding | 4.22 | 4.72 | 4.57 | 5.00 | 3.81 | 3.28 | 2.00 | 3.06 |
| Down | ENSMUSG00000075480 | -2.01 | 1.70E-04 | Gm10840       | protein_coding | 4.65 | 4.24 | 4.34 | 4.37 | 3.89 | 3.11 | 2.00 | 2.54 |
| Down | ENSMUSG00000074564 | -2.98 | 1.71E-04 | Gm10720       | protein_coding | 6.19 | 6.88 | 6.71 | 7.25 | 3.45 | 4.22 | 2.79 | 5.10 |
| Down | ENSMUSG00000039672 | -3.36 | 1.76E-04 | Kcne2         | protein_coding | 5.68 | 2.66 | 2.42 | 6.27 | 2.82 | 2.98 | 2.93 | 2.44 |
| Down | ENSMUSG00000018170 | -1.24 | 1.76E-04 | Ltbp1         | protein_coding | 5.58 | 5.76 | 6.17 | 5.98 | 3.55 | 4.24 | 5.13 | 5.47 |
| Down | ENSMUSG00000022996 | -3.15 | 1.77E-04 | Wnt10b        | protein_coding | 3.50 | 2.43 | 4.09 | 3.08 | 2.47 | 2.00 | 2.00 | 2.44 |
| Down | ENSMUSG00000028036 | -2.60 | 1.78E-04 | Ptgrf         | protein_coding | 3.81 | 4.47 | 4.20 | 4.76 | 2.13 | 2.70 | 2.13 | 3.53 |
| Down | ENSMUSG00000031712 | -2.58 | 1.78E-04 | Il15          | protein_coding | 3.72 | 3.57 | 4.40 | 4.12 | 2.13 | 2.78 | 2.00 | 3.12 |
| Down | ENSMUSG00000010136 | -2.27 | 1.79E-04 | Pifo          | protein_coding | 4.15 | 4.47 | 3.97 | 4.34 | 2.37 | 2.78 | 3.40 | 2.54 |
| Down | ENSMUSG00000049154 | -1.40 | 1.81E-04 | Fam183b       | protein_coding | 4.84 | 4.67 | 4.37 | 4.31 | 3.55 | 3.38 | 3.07 | 3.92 |
| Down | ENSMUSG00000037801 | -2.05 | 1.82E-04 | lqch          | protein_coding | 3.44 | 5.12 | 4.91 | 5.14 | 2.97 | 3.05 | 2.45 | 4.11 |
| Down | ENSMUSG00000096141 | -1.38 | 1.85E-04 | Dnah7a        | protein_coding | 5.41 | 6.00 | 6.00 | 6.02 | 4.99 | 4.66 | 3.35 | 5.05 |
| Down | ENSMUSG00000024677 | -2.79 | 1.86E-04 | Ms4a6b        | protein_coding | 4.22 | 4.79 | 3.89 | 3.65 | 2.00 | 2.53 | 2.45 | 3.17 |
| Down | ENSMUSG00000061802 | -1.94 | 1.89E-04 | Armc4         | protein_coding | 4.29 | 4.05 | 4.05 | 4.70 | 2.57 | 3.11 | 3.07 | 3.24 |
| Down |                    |       |          |               |                |      |      |      |      |      |      |      |      |

|      |                     |       |          |               |                |      |      |      |      |      |      |      |      |
|------|---------------------|-------|----------|---------------|----------------|------|------|------|------|------|------|------|------|
| Down | ENSMUSG00000031382  | -2.31 | 1.94E-04 | Asb11         | protein_coding | 4.11 | 3.83 | 4.65 | 4.60 | 2.00 | 2.44 | 3.45 | 3.12 |
| Down | ENSMUSG00000043925  | -3.10 | 1.95E-04 | Olfr544       | protein_coding | 3.44 | 2.66 | 3.93 | 3.86 | 2.00 | 2.00 | 2.00 | 2.92 |
| Down | ENSMUSG00000006235  | -1.78 | 1.95E-04 | Epor          | protein_coding | 3.67 | 4.31 | 4.73 | 4.28 | 3.67 | 3.00 | 2.35 | 3.57 |
| Down | ENSMUSG00000008964  | -5.54 | 1.97E-04 | Nat8f7        | protein_coding | 3.10 | 3.03 | 2.42 | 2.69 | 2.00 | 2.00 | 2.00 | 2.00 |
| Down | ENSMUSG00000015133  | -1.13 | 1.97E-04 | Lrrk1         | protein_coding | 4.70 | 5.38 | 5.53 | 5.44 | 4.74 | 4.16 | 3.50 | 4.63 |
| Up   | ENSMUSG00000004152  | 1.21  | 2.06E-04 | Tlbs1         | protein_coding | 3.72 | 4.53 | 4.82 | 4.96 | 5.44 | 5.98 | 5.65 | 5.44 |
| Down | ENSMUSG00000001929  | -2.17 | 2.06E-04 | Gm266         | protein_coding | 3.10 | 3.19 | 3.93 | 3.85 | 2.37 | 2.78 | 2.00 | 2.70 |
| Down | ENSMUSG00000007319  | -1.96 | 2.09E-04 | Speer4a       | protein_coding | 3.56 | 4.27 | 4.46 | 4.34 | 3.40 | 3.40 | 2.53 | 2.54 |
| Down | ENSMUSG00000028017  | -1.05 | 2.10E-04 | Egf           | protein_coding | 5.28 | 5.17 | 5.24 | 5.16 | 4.19 | 4.62 | 3.45 | 4.70 |
| Down | ENSMUSG000000094622 | -1.03 | 2.10E-04 | Gm3055        | protein_coding | 5.55 | 5.21 | 5.32 | 5.60 | 4.49 | 4.72 | 3.97 | 4.81 |
| Down | ENSMUSG00000004842  | -3.88 | 2.11E-04 | Pou1f1        | protein_coding | 3.77 | 4.50 | 4.05 | 4.45 | 2.00 | 2.00 | 2.00 | 2.99 |
| Down | ENSMUSG000000094338 | -2.47 | 2.11E-04 | Hist1h2bl     | protein_coding | 3.44 | 2.76 | 3.23 | 2.86 | 2.13 | 2.00 | 2.45 | 2.44 |
| Down | ENSMUSG000000026831 | -2.07 | 2.12E-04 | 1700007K13Rik | protein_coding | 4.51 | 4.05 | 3.75 | 4.80 | 3.29 | 3.33 | 2.00 | 2.92 |
| Down | ENSMUSG000000096169 | -1.96 | 2.12E-04 | Olfr1564      | protein_coding | 3.31 | 4.09 | 4.91 | 4.42 | 3.23 | 3.22 | 2.45 | 2.99 |
| Down | ENSMUSG000000035459 | -1.52 | 2.12E-04 | Stab2         | protein_coding | 5.64 | 5.47 | 5.32 | 5.71 | 3.55 | 4.62 | 3.45 | 4.81 |
| Down | ENSMUSG000000079022 | -1.40 | 2.15E-04 | Col22a1       | protein_coding | 4.80 | 5.84 | 5.63 | 5.73 | 4.28 | 4.64 | 3.87 | 4.46 |
| Down | ENSMUSG000000021228 | -1.21 | 2.16E-04 | Aco13         | protein_coding | 5.04 | 5.14 | 5.05 | 5.34 | 3.81 | 3.73 | 4.50 | 4.36 |
| Down | ENSMUSG000000075569 | -1.14 | 2.16E-04 | RspH10b       | protein_coding | 5.28 | 5.47 | 5.38 | 5.64 | 5.04 | 3.47 | 3.94 | 4.87 |
| Down | ENSMUSG000000048191 | -1.00 | 2.16E-04 | Muc6          | protein_coding | 4.57 | 5.26 | 4.68 | 5.25 | 4.19 | 3.94 | 4.47 | 3.92 |
| Down | ENSMUSG000000044583 | -2.11 | 2.19E-04 | Trf7          | protein_coding | 4.65 | 3.83 | 4.89 | 4.96 | 2.00 | 3.43 | 3.45 | 3.29 |
| Down | ENSMUSG000000049608 | -1.93 | 2.19E-04 | Gpr55         | protein_coding | 3.86 | 4.09 | 3.86 | 4.50 | 3.17 | 2.00 | 3.39 | 3.39 |
| Down | ENSMUSG000000020467 | -1.42 | 2.19E-04 | Efemp1        | protein_coding | 4.89 | 4.84 | 5.35 | 5.58 | 4.19 | 3.05 | 3.54 | 4.75 |
| Up   | ENSMUSG00000004703  | 1.20  | 2.23E-04 | Cyp2s1        | protein_coding | 4.29 | 4.50 | 4.17 | 4.65 | 5.58 | 5.81 | 5.52 | 5.10 |
| Down | ENSMUSG000000026931 | -3.96 | 2.23E-04 | 1700019N19Rik | protein_coding | 3.10 | 3.39 | 3.54 | 3.01 | 2.13 | 2.00 | 2.00 | 2.34 |
| Down | ENSMUSG000000115020 | -1.78 | 2.28E-04 | Vmn1r218      | protein_coding | 4.22 | 4.67 | 4.22 | 4.92 | 3.23 | 3.05 | 3.63 | 3.34 |
| Down | ENSMUSG000000038745 | -3.55 | 2.29E-04 | Nlrp6         | protein_coding | 4.07 | 3.57 | 4.09 | 4.42 | 2.13 | 2.00 | 2.63 | 2.54 |
| Down | ENSMUSG000000056130 | -3.21 | 2.30E-04 | Ticam2        | protein_coding | 3.81 | 4.79 | 5.04 | 4.19 | 2.00 | 2.78 | 2.00 | 3.23 |
| Down | ENSMUSG000000022901 | -2.83 | 2.31E-04 | Cd86          | protein_coding | 3.95 | 4.20 | 4.54 | 4.34 | 2.00 | 3.38 | 2.00 | 2.62 |
| Down | ENSMUSG000000030111 | -1.94 | 2.31E-04 | A2m           | protein_coding | 5.70 | 5.17 | 5.19 | 5.37 | 4.10 | 2.98 | 3.54 | 4.20 |
| Down | ENSMUSG000000003545 | -1.04 | 2.32E-04 | Fosb          | protein_coding | 5.82 | 5.98 | 5.98 | 5.97 | 4.86 | 5.21 | 4.47 | 5.28 |
| Down | ENSMUSG000000079018 | -2.08 | 2.34E-04 | Ly6c1         | protein_coding | 4.80 | 4.89 | 4.43 | 4.22 | 2.74 | 3.87 | 2.35 | 3.12 |
| Down | ENSMUSG000000068299 | -1.34 | 2.35E-04 | Nat8f4        | protein_coding | 5.89 | 6.57 | 5.78 | 6.25 | 4.25 | 5.67 | 4.47 | 4.90 |
| Down | ENSMUSG000000017765 | -1.06 | 2.35E-04 | Slc12a4       | protein_coding | 5.55 | 5.93 | 6.05 | 6.54 | 4.54 | 5.17 | 4.30 | 4.30 |
| Down | ENSMUSG000000064366 | -4.63 | 2.37E-04 | mt-Atp8       | protein_coding | 5.64 | 2.37 | 2.64 | 2.27 | 2.00 | 2.00 | 2.00 | 2.00 |
| Down | ENSMUSG000000072663 | -1.42 | 2.37E-04 | Spef2         | protein_coding | 5.45 | 5.70 | 5.55 | 6.06 | 5.30 | 3.61 | 3.35 | 4.74 |
| Up   | ENSMUSG000000024697 | 1.78  | 2.38E-04 | Gna14         | protein_coding | 3.50 | 3.03 | 3.36 | 3.86 | 4.94 | 4.47 | 4.85 | 5.00 |
| Down | ENSMUSG000000048865 | -1.72 | 2.38E-04 | Arhgap30      | protein_coding | 5.17 | 5.21 | 5.42 | 5.37 | 4.10 | 4.10 | 2.54 | 4.23 |
| Down | ENSMUSG000000028813 | -1.86 | 2.41E-04 | CK137956      | protein_coding | 4.15 | 4.31 | 3.54 | 4.60 | 3.50 | 2.70 | 2.54 | 3.06 |
| Down | ENSMUSG000000036395 | -1.79 | 2.41E-04 | Gilb12        | protein_coding | 4.75 | 4.95 | 4.89 | 5.44 | 2.13 | 4.47 | 3.24 | 3.70 |
| Down | ENSMUSG000000054545 | -1.58 | 2.41E-04 | Ugt1a6a       | protein_coding | 5.60 | 5.49 | 5.50 | 5.64 | 4.22 | 4.87 | 3.40 | 3.92 |
| Down | ENSMUSG000000090124 | -1.66 | 2.42E-04 | Ugt1a7c       | protein_coding | 5.78 | 5.38 | 5.49 | 5.70 | 3.89 | 4.70 | 3.67 | 4.20 |
| Down | ENSMUSG000000047986 | -1.70 | 2.43E-04 | Palm3         | protein_coding | 4.62 | 5.21 | 4.78 | 5.00 | 4.07 | 4.07 | 3.59 | 3.44 |
| Down | ENSMUSG000000027456 | -1.17 | 2.43E-04 | Sdcbp2        | protein_coding | 4.70 | 5.23 | 4.49 | 4.50 | 4.06 | 3.77 | 3.97 | 3.48 |
| Down | ENSMUSG000000044948 | -1.11 | 2.43E-04 | Cfap43        | protein_coding | 5.98 | 5.71 | 5.72 | 5.94 | 4.61 | 4.58 | 4.33 | 5.52 |
| Down | ENSMUSG000000060508 | -3.10 | 2.44E-04 | Nlrp9b        | protein_coding | 3.86 | 3.68 | 3.54 | 3.86 | 2.25 | 2.44 | 2.00 | 2.62 |
| Up   | ENSMUSG000000062694 | 2.89  | 2.50E-04 | Cav3          | protein_coding | 2.65 | 3.26 | 2.00 | 2.66 | 4.26 | 4.89 | 5.40 | 4.17 |
| Down | ENSMUSG000000035288 | -2.45 | 2.50E-04 | Sfrs8         | protein_coding | 4.36 | 3.78 | 4.20 | 3.17 | 2.34 | 2.34 | 2.99 | 2.99 |
| Down | ENSMUSG000000022749 | -2.38 | 2.50E-04 | Tmc1          | protein_coding | 3.67 | 4.72 | 4.75 | 5.24 | 3.29 | 2.62 | 2.54 | 3.48 |
| Down | ENSMUSG000000022464 | -2.33 | 2.50E-04 | Slc38a4       | protein_coding | 4.36 | 4.79 | 4.49 | 4.98 | 3.17 | 3.43 | 3.00 | 3.23 |
| Down | ENSMUSG00000016918  | -2.16 | 2.51E-04 | Sulf1         | protein_coding | 6.80 | 6.20 | 6.17 | 6.93 | 5.42 | 3.69 | 2.45 | 5.17 |
| Down | ENSMUSG000000039518 | -3.08 | 2.52E-04 | Cdsn          | protein_coding | 3.18 | 3.88 | 3.70 | 2.86 | 2.37 | 2.00 | 2.00 | 2.62 |
| Down | ENSMUSG000000074872 | -1.15 | 2.52E-04 | Cbx2          | protein_coding | 5.12 | 5.50 | 4.93 | 5.45 | 4.34 | 4.94 | 3.79 | 3.78 |
| Down | ENSMUSG000000040838 | -1.24 | 2.53E-04 | Gm11639       | protein_coding | 6.24 | 6.31 | 6.35 | 6.43 | 3.69 | 5.70 | 4.73 | 5.76 |
| Down | ENSMUSG000000039109 | -1.80 | 2.55E-04 | F13a1         | protein_coding | 5.29 | 4.89 | 5.15 | 4.82 | 4.13 | 4.47 | 2.24 | 3.39 |
| Down | ENSMUSG000000047143 | -2.48 | 2.64E-04 | Dmrt2         | protein_coding | 2.00 | 4.67 | 3.88 | 4.52 | 4.09 | 3.06 | 2.35 | 2.70 |
| Down | ENSMUSG000000056481 | -1.78 | 2.64E-04 | Cd248         | protein_coding | 4.67 | 3.78 | 4.54 | 4.28 | 3.81 | 2.24 | 2.93 | 3.17 |
| Down | ENSMUSG000000027896 | -3.01 | 2.66E-04 | Slc16a4       | protein_coding | 4.32 | 4.79 | 4.87 | 4.53 | 2.00 | 2.62 | 2.00 | 3.62 |
| Down | ENSMUSG000000073599 | -1.94 | 2.69E-04 | Ecscr         | protein_coding | 4.32 | 4.67 | 4.34 | 4.30 | 3.43 | 3.35 | 3.06 | 3.06 |
| Down | ENSMUSG000000110576 | -4.05 | 2.70E-04 | Gm36368       | protein_coding | 3.50 | 2.55 | 3.09 | 3.08 | 2.00 | 2.00 | 2.00 | 2.34 |
| Down | ENSMUSG000000027684 | -1.50 | 2.72E-04 | Mecom         | protein_coding | 4.91 | 5.67 | 5.81 | 5.38 | 3.96 | 3.28 | 4.14 | 4.14 |
| Down | ENSMUSG000000079061 | -4.96 | 2.79E-04 | Gm11042       | protein_coding | 2.54 | 2.55 | 2.64 | 2.69 | 2.00 | 2.00 | 2.00 | 2.00 |
| Down | ENSMUSG000000007039 | -2.28 | 2.82E-04 | Sult5a1       | protein_coding | 3.61 | 4.01 | 4.43 | 3.39 | 2.37 | 2.98 | 2.54 | 2.62 |
| Down | ENSMUSG000000066797 | -2.24 | 2.84E-04 | Zfp648        | protein_coding | 3.02 | 4.09 | 3.43 | 3.27 | 2.47 | 2.12 | 2.71 | 2.54 |
| Down | ENSMUSG000000046618 | -1.41 | 2.87E-04 | Ofml2a        | protein_coding | 4.29 | 4.79 | 4.13 | 4.28 | 3.29 | 2.78 | 3.79 | 3.62 |
| Down | ENSMUSG000000020186 | -1.15 | 2.87E-04 | Crsp2         | protein_coding | 5.24 | 5.02 | 4.85 | 5.31 | 3.89 | 3.52 | 4.85 | 4.03 |
| Up   | ENSMUSG000000050394 | 1.20  | 2.88E-04 | Armxc6        | protein_coding | 4.89 | 4.58 | 4.63 | 4.70 | 5.71 | 5.96 | 5.41 | 5.92 |
| Down | ENSMUSG000000022510 | -1.94 | 2.89E-04 | Trp63         | protein_coding | 5.02 | 5.35 | 5.00 | 5.72 | 2.57 | 4.22 | 3.79 | 3.85 |
| Down | ENSMUSG000000037016 | -1.20 | 2.89E-04 | Frem2         | protein_coding | 5.64 | 5.64 | 5.56 | 5.90 | 4.68 | 4.13 | 5.38 | 5.38 |
| Down | ENSMUSG000000051727 | -2.58 | 2.91E-04 | Kctd14        | protein_coding | 4.45 | 3.92 | 4.85 | 4.70 | 2.00 | 2.98 | 2.79 | 3.29 |
| Down | ENSMUSG000000010841 | -2.89 | 2.97E-04 | Cfap97d1      | protein_coding | 2.94 | 3.68 | 2.93 | 3.27 | 2.44 | 2.44 | 2.00 | 2.00 |
| Down | ENSMUSG000000022715 | -2.90 | 2.98E-04 | Tmem114       | protein_coding | 4.32 | 4.67 | 4.46 | 4.39 | 2.00 | 2.00 | 2.71 | 3.39 |
| Down | ENSMUSG000000054690 | -2.39 | 2.98E-04 | Ercn          | protein_coding | 4.15 | 4.67 | 4.75 | 4.42 | 3.73 | 2.92 | 2.00 | 2.54 |
| Down | ENSMUSG000000027360 | -2.50 | 3.01E-04 | Hdc           | protein_coding | 4.59 | 4.82 | 4.85 | 4.80 | 3.23 | 3.47 | 2.99 | 2.99 |
| Down | ENSMUSG000000034384 | -1.11 | 3.02E-04 | Beth2         | protein_coding | 3.56 | 2.95 | 3.01 | 2.94 | 2.00 | 2.00 | 2.00 | 2.00 |
| Down | ENSMUSG000000040616 | -1.77 | 3.02E-04 | Tmem51        | protein_coding | 4.54 | 4.24 | 4.24 | 4.34 | 3.17 | 3.73 | 2.86 | 2.92 |
| Down | ENSMUSG000000031323 | -1.81 | 3.04E-04 | Dmrtc1a       | protein_coding | 4.03 | 3.83 | 4.63 | 4.53 | 2.25 | 2.78 | 3.07 | 3.78 |
| Down | ENSMUSG000000035179 | -2.00 | 3.13E-04 | Ppp1r32       | protein_coding | 4.32 | 4.09 | 3.49 | 3.69 | 2.13 | 3.11 | 3.00 | 2.62 |
| Down | ENSMUSG000000096753 | -4.31 | 3.14E-04 | Fam181a       | protein_coding | 2.65 | 2.55 | 3.65 | 3.69 | 2.00 | 2.00 | 2.00 | 2.34 |
| Down | ENSMUSG000000028270 | -2.80 | 3.14E-04 | Gbp2          | protein_coding | 4.18 | 4.01 | 4.09 | 3.94 | 2.47 | 2.44 | 2.00 | 3.06 |
| Down | ENSMUSG000000078439 | -2.50 | 3.20E-04 | Smim24        | protein_coding | 3.77 | 3.57 | 3.49 | 3.39 | 2.57 | 2.00 | 2.00 | 2.92 |
| Up   | ENSMUSG000000005124 | 1.10  | 3.21E-04 | Ccn4          | protein_coding | 3.81 | 4.17 | 3.60 | 4.28 | 4.59 | 4.64 | 5.33 | 4.85 |
| Down | ENSMUSG000000029826 | -2.31 | 3.23E-04 | Zc3hav1       | protein_coding | 5.57 | 5.38 | 5.83 | 5.73 | 4.28 | 3.69 | 2.00 | 4.05 |
| Down | ENSMUSG000000036962 | -1.98 | 3.23E-04 | Cfap221       | protein_coding | 4.15 | 4.20 | 3.93 | 3.74 | 3.05 | 3.13 | 2.62 | 2.62 |
| Down | ENSMUSG000000036768 | -1.67 | 3.24E-04 | Kif15         | protein_coding | 4.87 | 4.91 | 5.52 | 5.27 | 3.50 | 4.13 | 2.71 | 4.36 |
| Up   | ENSMUSG000000023031 | 1.39  | 3.26E-04 | Cela1         | protein_coding | 3.44 | 4.05 | 3.16 | 4.02 | 4.59 | 4.58 | 4.85 | 5.13 |
| Down | ENSMUSG000000032231 | -1.20 | 3.26E-04 | Anxa2         | protein_coding | 5.08 | 5.44 | 4.93 | 5.00 | 3.77 | 3.80 | 3.90 | 4.77 |
| Down | ENSMUSG000000026065 | -1.12 | 3.29E-04 | Cenpf         | protein_coding | 5.75 |      |      |      |      |      |      |      |

|      |                     |       |          |               |                |      |      |      |      |      |      |      |      |
|------|---------------------|-------|----------|---------------|----------------|------|------|------|------|------|------|------|------|
| Down | ENSMUSG00000073945  | -5.61 | 3.32E-04 | Olf1f18       | protein_coding | 2.85 | 2.76 | 2.74 | 3.08 | 2.00 | 2.00 | 2.00 | 2.00 |
| Down | ENSMUSG00000019838  | -1.15 | 3.32E-04 | Sic16a10      | protein_coding | 5.26 | 5.10 | 5.42 | 5.46 | 3.17 | 4.40 | 4.67 | 4.63 |
| Down | ENSMUSG00000037440  | -5.38 | 3.34E-04 | Vnn1          | protein_coding | 3.18 | 2.00 | 3.23 | 3.82 | 2.00 | 2.00 | 2.00 | 2.24 |
| Down | ENSMUSG000000051503 | -4.51 | 3.35E-04 | Gm6583        | protein_coding | 2.75 | 2.95 | 2.93 | 3.39 | 2.00 | 2.12 | 2.00 | 2.12 |
| Down | ENSMUSG000000042988 | -3.02 | 3.35E-04 | Notum         | protein_coding | 2.94 | 3.03 | 3.49 | 3.65 | 2.00 | 2.34 | 2.00 | 2.54 |
| Down | ENSMUSG000000033107 | -1.80 | 3.37E-04 | Rnf125        | protein_coding | 3.91 | 4.05 | 3.93 | 4.02 | 2.90 | 3.17 | 2.63 | 2.78 |
| Down | ENSMUSG000000049799 | -2.09 | 3.38E-04 | Linc19        | protein_coding | 3.18 | 3.61 | 3.49 | 3.98 | 2.00 | 2.00 | 2.00 | 2.99 |
| Down | ENSMUSG000000098687 | -4.53 | 3.39E-04 | Gm20594       | protein_coding | 2.43 | 2.43 | 2.64 | 2.38 | 2.00 | 2.00 | 2.00 | 2.00 |
| Down | ENSMUSG000000061188 | -4.56 | 3.45E-04 | Cxcl17        | protein_coding | 2.54 | 2.86 | 3.54 | 3.08 | 2.00 | 2.00 | 2.00 | 2.24 |
| Down | ENSMUSG000000033220 | -3.38 | 3.45E-04 | Rac2          | protein_coding | 3.95 | 4.31 | 4.17 | 3.94 | 2.00 | 2.00 | 2.00 | 3.17 |
| Down | ENSMUSG000000042417 | -2.50 | 3.45E-04 | Ccno          | protein_coding | 3.95 | 4.05 | 3.70 | 3.60 | 2.37 | 2.44 | 2.13 | 3.06 |
| Down | ENSMUSG000000091006 | -2.41 | 3.45E-04 | Vmn2r69       | protein_coding | 4.51 | 4.89 | 4.80 | 4.48 | 3.35 | 2.53 | 3.30 | 2.70 |
| Down | ENSMUSG000000029204 | -2.17 | 3.45E-04 | Rhoc          | protein_coding | 4.36 | 4.77 | 5.04 | 4.70 | 2.82 | 2.12 | 2.71 | 4.17 |
| Down | ENSMUSG000000009097 | -3.44 | 3.46E-04 | Tbx1          | protein_coding | 3.72 | 3.39 | 3.30 | 3.33 | 2.13 | 2.44 | 2.00 | 2.24 |
| Down | ENSMUSG000000039977 | -1.92 | 3.50E-04 | Deup1         | protein_coding | 4.18 | 4.17 | 3.65 | 4.19 | 2.82 | 3.33 | 2.45 | 2.78 |
| Down | ENSMUSG000000031274 | -2.04 | 3.55E-04 | Col4a5        | protein_coding | 4.65 | 4.61 | 5.05 | 5.11 | 3.69 | 3.22 | 2.00 | 3.85 |
| Down | ENSMUSG000000027994 | -1.56 | 3.57E-04 | Mcub          | protein_coding | 5.47 | 4.67 | 4.63 | 4.67 | 3.64 | 4.04 | 3.30 | 3.85 |
| Down | ENSMUSG000000021765 | -1.85 | 3.59E-04 | Fst           | protein_coding | 4.15 | 4.56 | 4.43 | 4.25 | 2.74 | 2.62 | 2.86 | 3.81 |
| Down | ENSMUSG000000049537 | -4.70 | 3.62E-04 | Teor1         | protein_coding | 3.10 | 3.63 | 3.16 | 4.63 | 2.37 | 2.00 | 2.00 | 2.12 |
| Down | ENSMUSG000000071001 | -2.73 | 3.64E-04 | Hrc11         | protein_coding | 3.31 | 2.95 | 2.64 | 2.59 | 2.00 | 2.00 | 2.00 | 2.00 |
| Down | ENSMUSG000000022429 | -2.69 | 3.64E-04 | Dms1          | protein_coding | 4.26 | 3.73 | 3.09 | 3.21 | 2.57 | 2.12 | 2.00 | 2.78 |
| Down | ENSMUSG000000061048 | -2.12 | 3.64E-04 | Cdh3          | protein_coding | 3.91 | 4.13 | 4.01 | 3.39 | 2.74 | 2.85 | 2.35 | 2.78 |
| Down | ENSMUSG000000050377 | -1.73 | 3.64E-04 | Il31ra        | protein_coding | 4.67 | 3.97 | 5.00 | 4.96 | 3.29 | 3.39 | 3.19 | 3.85 |
| Down | ENSMUSG000000018920 | -1.91 | 3.65E-04 | Cxcl16        | protein_coding | 4.39 | 4.47 | 3.89 | 4.39 | 2.74 | 3.84 | 2.00 | 2.92 |
| Down | ENSMUSG000000030693 | -2.65 | 3.69E-04 | Klk10         | protein_coding | 3.72 | 4.27 | 3.89 | 4.02 | 2.00 | 3.33 | 2.13 | 2.34 |
| Down | ENSMUSG000000026650 | -2.45 | 3.71E-04 | Meig1         | protein_coding | 4.67 | 4.27 | 4.57 | 4.92 | 2.47 | 2.98 | 2.00 | 3.78 |
| Down | ENSMUSG000000028589 | -6.37 | 3.78E-04 | 1700012P22Rik | protein_coding | 3.38 | 2.66 | 3.36 | 3.50 | 2.00 | 2.00 | 2.00 | 2.00 |
| Down | ENSMUSG000000028970 | -1.18 | 3.81E-04 | Abcb1b        | protein_coding | 5.70 | 5.71 | 6.02 | 5.81 | 4.66 | 5.51 | 3.59 | 4.66 |
| Down | ENSMUSG000000008845 | -1.87 | 3.83E-04 | Cd163         | protein_coding | 5.00 | 5.02 | 5.07 | 4.65 | 2.13 | 3.94 | 3.63 | 3.70 |
| Down | ENSMUSG000000020388 | -1.74 | 3.85E-04 | Pdim4         | protein_coding | 4.80 | 5.10 | 4.52 | 5.41 | 2.25 | 4.37 | 2.79 | 4.04 |
| Down | ENSMUSG000000057503 | -4.22 | 3.91E-04 | Olf1r1459     | protein_coding | 3.61 | 4.31 | 3.30 | 3.86 | 2.00 | 2.44 | 2.00 | 2.28 |
| Down | ENSMUSG000000049872 | -1.08 | 3.92E-04 | Calhm5        | protein_coding | 5.68 | 5.87 | 5.78 | 5.53 | 3.96 | 5.37 | 4.79 | 4.55 |
| Down | ENSMUSG000000048766 | -6.31 | 3.93E-04 | Srsf110       | protein_coding | 3.25 | 4.01 | 3.30 | 3.20 | 2.00 | 2.12 | 2.00 | 2.12 |
| Down | ENSMUSG000000027331 | 2.04  | 3.93E-04 | Kns3r         | protein_coding | 4.42 | 4.86 | 4.24 | 4.87 | 2.79 | 3.73 | 2.79 | 3.95 |
| Down | ENSMUSG000000073968 | -1.26 | 3.95E-04 | Trim68        | protein_coding | 4.84 | 4.97 | 4.49 | 5.16 | 3.60 | 3.69 | 4.22 | 3.92 |
| Down | ENSMUSG000000045555 | -1.52 | 3.97E-04 | Mettl24       | protein_coding | 3.95 | 4.05 | 4.54 | 4.65 | 2.74 | 3.87 | 2.86 | 3.29 |
| Up   | ENSMUSG000000015247 | 1.14  | 3.99E-04 | Nipsnap3b     | protein_coding | 5.24 | 5.56 | 5.45 | 5.94 | 6.65 | 6.43 | 6.79 | 6.71 |
| Down | ENSMUSG000000041301 | -1.73 | 4.00E-04 | Ctr           | protein_coding | 4.11 | 4.37 | 4.85 | 4.87 | 3.04 | 3.05 | 3.13 | 3.89 |
| Down | ENSMUSG000000026814 | -1.65 | 4.01E-04 | Eng           | protein_coding | 5.13 | 5.35 | 5.17 | 4.70 | 2.00 | 3.77 | 4.38 | 4.02 |
| Down | ENSMUSG000000036459 | -1.76 | 4.05E-04 | Wtip          | protein_coding | 4.42 | 3.63 | 4.75 | 4.53 | 2.90 | 3.52 | 2.00 | 3.70 |
| Down | ENSMUSG000000005107 | -2.02 | 4.07E-04 | Sic2a9        | protein_coding | 4.98 | 4.93 | 5.26 | 5.17 | 2.13 | 3.17 | 4.19 | 3.81 |
| Down | ENSMUSG000000035394 | -1.85 | 4.07E-04 | Cfap53        | protein_coding | 4.18 | 4.41 | 4.17 | 4.25 | 3.43 | 4.72 | 2.86 | 3.72 |
| Down | ENSMUSG000000112160 | -1.04 | 4.07E-04 | BC024063      | protein_coding | 4.84 | 5.87 | 5.45 | 5.79 | 4.92 | 4.10 | 4.79 | 4.57 |
| Down | ENSMUSG000000006649 | -1.77 | 4.14E-04 | Nphs1         | protein_coding | 4.32 | 3.83 | 4.54 | 4.28 | 3.11 | 4.15 | 3.35 | 2.92 |
| Down | ENSMUSG000000034452 | -1.77 | 4.15E-04 | Sic24a1       | protein_coding | 4.07 | 3.88 | 4.73 | 4.25 | 3.17 | 2.92 | 2.24 | 3.66 |
| Down | ENSMUSG000000041954 | -1.03 | 4.15E-04 | Trnfrf18      | protein_coding | 3.77 | 3.92 | 4.30 | 4.31 | 3.60 | 3.78 | 3.67 | 3.34 |
| Up   | ENSMUSG000000041901 | 1.20  | 4.19E-04 | Phd3a3        | protein_coding | 5.86 | 5.40 | 5.77 | 6.05 | 7.23 | 6.03 | 6.86 | 7.27 |
| Down | ENSMUSG000000068696 | -1.84 | 4.19E-04 | Gpr88         | protein_coding | 5.87 | 6.51 | 5.77 | 6.86 | 3.29 | 5.53 | 3.30 | 5.13 |
| Down | ENSMUSG000000051262 | -3.36 | 4.37E-04 | Nat8f3        | protein_coding | 2.65 | 3.39 | 2.42 | 3.65 | 2.00 | 2.00 | 2.13 | 2.44 |
| Down | ENSMUSG000000089272 | -1.98 | 4.37E-04 | Hist1h2ae     | protein_coding | 3.99 | 4.17 | 4.65 | 3.86 | 2.57 | 2.62 | 2.24 | 3.78 |
| Down | ENSMUSG000000047031 | -2.31 | 4.43E-04 | Vmn1r68       | protein_coding | 4.77 | 4.95 | 5.07 | 4.97 | 3.47 | 3.47 | 3.35 | 2.44 |
| Down | ENSMUSG000000020573 | -1.73 | 4.43E-04 | Pik3cg        | protein_coding | 5.33 | 5.14 | 5.02 | 5.63 | 4.34 | 3.87 | 2.00 | 4.31 |
| Down | ENSMUSG000000031461 | -1.86 | 4.44E-04 | Myom2         | protein_coding | 4.62 | 4.64 | 4.27 | 4.85 | 2.97 | 3.69 | 2.54 | 3.57 |
| Down | ENSMUSG000000055912 | -1.08 | 4.45E-04 | Tmem150a      | protein_coding | 4.77 | 4.50 | 4.91 | 5.22 | 4.49 | 3.47 | 3.59 | 4.23 |
| Down | ENSMUSG000000024227 | -2.17 | 4.47E-04 | Pdzph1        | protein_coding | 4.45 | 4.53 | 4.20 | 4.50 | 3.47 | 3.47 | 2.24 | 3.48 |
| Down | ENSMUSG000000081769 | -1.69 | 4.50E-04 | Gm12216       | protein_coding | 3.81 | 3.73 | 4.20 | 4.15 | 3.55 | 3.17 | 2.00 | 2.62 |
| Down | ENSMUSG000000073424 | -1.07 | 4.52E-04 | Cyp4f15       | protein_coding | 5.26 | 5.47 | 5.17 | 5.17 | 4.85 | 4.85 | 4.61 | 3.17 |
| Down | ENSMUSG000000032572 | -1.78 | 4.53E-04 | Col8a4        | protein_coding | 4.75 | 5.68 | 5.73 | 3.29 | 4.35 | 3.50 | 3.50 | 4.25 |
| Down | ENSMUSG000000024862 | -1.83 | 4.58E-04 | Klc2          | protein_coding | 3.44 | 3.73 | 3.54 | 2.94 | 2.74 | 2.53 | 2.24 | 2.70 |
| Down | ENSMUSG000000028346 | -1.31 | 4.59E-04 | Cavin4        | protein_coding | 4.54 | 4.44 | 4.95 | 4.22 | 4.82 | 4.24 | 3.19 | 3.62 |
| Down | ENSMUSG000000109179 | -1.77 | 4.68E-04 | Gm35339       | protein_coding | 3.99 | 4.91 | 4.93 | 4.82 | 3.23 | 5.53 | 3.71 | 3.85 |
| Down | ENSMUSG000000006179 | -3.20 | 4.69E-04 | Prss16        | protein_coding | 4.91 | 4.17 | 3.60 | 4.02 | 2.00 | 2.00 | 2.00 | 3.17 |
| Down | ENSMUSG000000038560 | -3.36 | 4.74E-04 | Sp6           | protein_coding | 3.50 | 3.39 | 3.70 | 3.86 | 2.00 | 2.00 | 2.00 | 2.85 |
| Down | ENSMUSG000000005493 | -1.84 | 4.76E-04 | Msh4          | protein_coding | 4.22 | 4.01 | 3.97 | 3.94 | 2.47 | 2.53 | 3.40 | 2.99 |
| Down | ENSMUSG000000042895 | -2.32 | 4.77E-04 | Abra          | protein_coding | 2.85 | 3.11 | 3.97 | 3.74 | 2.13 | 2.34 | 2.00 | 3.06 |
| Down | ENSMUSG000000033207 | -1.87 | 4.77E-04 | Mamdc2        | protein_coding | 3.61 | 4.24 | 4.09 | 4.22 | 2.82 | 2.24 | 2.63 | 3.57 |
| Down | ENSMUSG000000062200 | -2.92 | 4.78E-04 | Vmn2r7        | protein_coding | 4.72 | 4.53 | 4.17 | 4.70 | 2.66 | 2.53 | 2.00 | 3.34 |
| Down | ENSMUSG000000061535 | -2.64 | 4.79E-04 | C1qtnf7       | protein_coding | 3.50 | 4.69 | 4.54 | 4.20 | 2.62 | 3.12 | 2.79 | 3.70 |
| Down | ENSMUSG000000036899 | -3.01 | 4.81E-04 | Trpv5         | protein_coding | 3.50 | 4.58 | 3.49 | 3.74 | 2.25 | 2.53 | 2.00 | 2.78 |
| Down | ENSMUSG000000035296 | -3.01 | 4.83E-04 | Sgcg          | protein_coding | 3.67 | 4.01 | 3.89 | 4.50 | 2.24 | 2.24 | 2.00 | 2.92 |
| Down | ENSMUSG000000024538 | -2.45 | 4.84E-04 | Ppic          | protein_coding | 2.00 | 3.63 | 2.00 | 2.75 | 2.00 | 2.78 | 2.35 | 2.44 |
| Down | ENSMUSG000000035916 | -2.33 | 4.87E-04 | Ptprq         | protein_coding | 4.45 | 5.43 | 5.09 | 5.38 | 3.04 | 3.33 | 3.13 | 3.78 |
| Down | ENSMUSG000000028346 | -1.82 | 4.89E-04 | Lst2          | protein_coding | 4.11 | 4.41 | 3.60 | 4.19 | 2.90 | 3.70 | 2.34 | 3.24 |
| Up   | ENSMUSG000000048376 | 1.09  | 4.90E-04 | F2r           | protein_coding | 4.82 | 5.10 | 5.73 | 4.96 | 5.73 | 5.04 | 5.70 | 5.96 |
| Down | ENSMUSG000000011154 | -1.85 | 4.90E-04 | Cfap161       | protein_coding | 4.15 | 4.93 | 4.30 | 4.53 | 3.11 | 2.92 | 3.67 | 2.99 |
| Up   | ENSMUSG000000029557 | 1.01  | 4.95E-04 | Mrm2          | protein_coding | 4.77 | 5.00 | 4.70 | 5.71 | 6.58 | 5.87 | 5.84 | 5.66 |
| Down | ENSMUSG000000058831 | -2.17 | 4.97E-04 | Opn1sw        | protein_coding | 3.50 | 3.83 | 3.75 | 4.05 | 2.90 | 2.53 | 3.40 | 2.99 |
| Down | ENSMUSG000000026405 | -2.72 | 4.98E-04 | C4bp          | protein_coding | 3.91 | 4.56 | 4.63 | 4.70 | 3.17 | 2.62 | 2.00 | 2.99 |
| Down | ENSMUSG000000002885 | -1.30 | 4.99E-04 | Adgre5        | protein_coding | 4.95 | 4.67 | 4.91 | 4.60 | 2.66 | 4.22 | 3.87 | 3.89 |
| Down | ENSMUSG000000026142 | -1.08 | 5.10E-04 | Rhbdd1        | protein_coding | 5.69 | 5.49 | 5.73 | 5.95 | 5.29 | 4.19 | 4.33 | 4.98 |
| Down | ENSMUSG000000109561 | -2.77 | 5.16E-04 | Ankrd31       | protein_coding | 4.54 | 4.09 | 4.05 | 4.96 | 2.12 | 3.00 | 3.17 | 3.17 |
| Up   | ENSMUSG000000043448 | 1.09  | 5.20E-04 | Gjc2          | protein_coding | 5.89 | 5.50 | 5.86 | 6.15 | 7.39 | 6.12 | 6.52 | 7.22 |
| Down | ENSMUSG000000091455 | -1.32 | 5.24E-04 | Otogl         | protein_coding | 5.06 | 5.04 | 5.32 | 5.44 | 4.10 | 4.40 | 4.07 | 5.44 |
| Down | ENSMUSG000000044017 | -1.08 | 5.28E-04 | Adgrd1        | protein_coding | 4.57 | 4.82 | 5.19 | 5.17 | 4.59 | 3.87 | 4.17 | 4.17 |
| Down | ENSMUSG000000015202 | -1.12 | 5.29E-04 | Cnksr3        | protein_coding | 5.38 | 5.29 | 5.53 | 5.58 | 4.13 | 3.59 | 4.61 | 4.61 |
| Down | ENSMUSG000000023571 | -1.58 | 5.31E-04 | C1qtnf12      | protein_coding | 3.95 | 3.78 | 4.05 | 4.28 | 3.29 | 2.92 | 2.63 | 3.17 |
| Down | ENSMUSG000000022184 | -1.12 | 5.31E-04 | Fbxo4         | protein_coding | 5.04 | 5.21 | 5.19 |      |      |      |      |      |

|      |                    |       |          |               |                |      |      |      |      |      |      |      |      |
|------|--------------------|-------|----------|---------------|----------------|------|------|------|------|------|------|------|------|
| Down | ENSMUSG0000001663  | -1.43 | 5.44E-04 | Gstt1         | protein_coding | 3.56 | 4.20 | 4.20 | 3.78 | 3.11 | 2.78 | 3.19 | 3.12 |
| Down | ENSMUSG0000001555  | -1.36 | 5.45E-04 | Fkbp10        | protein_coding | 5.19 | 4.61 | 4.70 | 4.60 | 4.03 | 3.05 | 3.19 | 4.28 |
| Down | ENSMUSG00000024349 | -2.18 | 5.46E-04 | Tmem173       | protein_coding | 4.51 | 4.84 | 4.40 | 4.58 | 2.00 | 3.38 | 3.59 | 2.85 |
| Down | ENSMUSG00000021175 | -1.99 | 5.59E-04 | Cdca71        | protein_coding | 3.95 | 4.69 | 4.65 | 4.34 | 2.37 | 2.92 | 3.24 | 3.53 |
| Down | ENSMUSG00000051611 | -3.81 | 5.60E-04 | Olfr112       | protein_coding | 3.81 | 4.37 | 3.23 | 3.65 | 2.00 | 2.24 | 2.00 | 2.62 |
| Down | ENSMUSG00000051136 | -2.93 | 5.60E-04 | Ghr           | protein_coding | 4.48 | 4.41 | 4.73 | 4.55 | 2.00 | 2.00 | 3.40 | 2.92 |
| Down | ENSMUSG00000030969 | -2.47 | 5.61E-04 | Alkb4b        | protein_coding | 3.81 | 4.05 | 3.93 | 3.96 | 2.00 | 2.70 | 3.12 | 3.12 |
| Down | ENSMUSG00000034394 | -2.22 | 5.61E-04 | Lif           | protein_coding | 4.26 | 3.78 | 4.05 | 4.15 | 3.11 | 3.05 | 2.00 | 2.62 |
| Down | ENSMUSG00000009114 | -2.21 | 5.61E-04 | 2610028H24Rik | protein_coding | 4.11 | 4.05 | 4.01 | 3.60 | 2.97 | 2.00 | 3.00 | 2.62 |
| Down | ENSMUSG00000029864 | -1.28 | 5.63E-04 | Gstk1         | protein_coding | 5.34 | 5.35 | 5.48 | 5.27 | 4.39 | 3.47 | 4.87 | 3.99 |
| Down | ENSMUSG00000050549 | -1.41 | 5.65E-04 | Fam241a       | protein_coding | 4.39 | 3.97 | 4.49 | 4.58 | 3.40 | 3.69 | 2.54 | 3.57 |
| Down | ENSMUSG00000068794 | -2.57 | 5.66E-04 | Col28a1       | protein_coding | 3.99 | 4.58 | 3.84 | 4.98 | 2.82 | 2.24 | 3.40 | 2.44 |
| Down | ENSMUSG00000074995 | -6.19 | 5.69E-04 | Olfr201       | protein_coding | 2.94 | 3.33 | 2.64 | 3.55 | 2.00 | 2.00 | 2.00 | 2.00 |
| Down | ENSMUSG0000006519  | -2.51 | 5.69E-04 | Cyba          | protein_coding | 4.45 | 4.17 | 4.20 | 4.58 | 2.00 | 2.85 | 3.45 | 2.44 |
| Down | ENSMUSG00000056987 | -1.73 | 5.71E-04 | Fam71d        | protein_coding | 3.81 | 3.73 | 3.80 | 3.60 | 2.47 | 2.98 | 2.54 | 2.99 |
| Down | ENSMUSG00000063975 | -4.15 | 5.73E-04 | Sloca1a5      | protein_coding | 3.77 | 3.83 | 3.01 | 3.65 | 2.13 | 2.12 | 2.00 | 2.34 |
| Down | ENSMUSG00000068129 | -3.29 | 5.77E-04 | Cst7          | protein_coding | 2.94 | 3.26 | 3.23 | 2.86 | 2.00 | 2.00 | 2.13 | 2.44 |
| Down | ENSMUSG00000027776 | -1.97 | 5.77E-04 | Il12a         | protein_coding | 3.61 | 3.73 | 3.93 | 3.27 | 2.74 | 2.12 | 2.54 | 2.99 |
| Down | ENSMUSG00000038543 | -2.24 | 5.84E-04 | BC028528      | protein_coding | 4.26 | 3.46 | 3.84 | 4.02 | 2.57 | 2.70 | 2.13 | 3.12 |
| Down | ENSMUSG00000091239 | -1.74 | 5.92E-04 | Vmn2r76       | protein_coding | 5.48 | 5.28 | 5.63 | 5.52 | 2.82 | 4.47 | 4.24 | 4.05 |
| Down | ENSMUSG00000027318 | -1.65 | 5.92E-04 | Adam33        | protein_coding | 3.99 | 3.73 | 4.05 | 3.37 | 3.17 | 2.79 | 3.23 | 2.79 |
| Down | ENSMUSG00000045802 | -5.91 | 5.96E-04 | Hsf3          | protein_coding | 2.94 | 2.55 | 4.01 | 3.69 | 2.00 | 2.00 | 2.00 | 2.12 |
| Down | ENSMUSG00000094091 | -3.82 | 6.10E-04 | Gm21885       | protein_coding | 3.31 | 2.95 | 2.15 | 3.21 | 2.00 | 2.00 | 2.00 | 2.34 |
| Down | ENSMUSG00000047363 | -1.73 | 6.11E-04 | Cstad         | protein_coding | 3.77 | 4.47 | 5.04 | 4.28 | 4.16 | 2.62 | 2.63 | 2.92 |
| Down | ENSMUSG00000019890 | -2.49 | 6.15E-04 | Nts           | protein_coding | 5.44 | 5.84 | 5.72 | 5.70 | 2.13 | 3.91 | 2.24 | 4.68 |
| Down | ENSMUSG00000056910 | -2.63 | 6.17E-04 | Vmn2r107      | protein_coding | 4.62 | 4.50 | 4.52 | 4.60 | 3.55 | 2.24 | 2.79 | 2.44 |
| Down | ENSMUSG00000003932 | -1.90 | 6.19E-04 | Fap           | protein_coding | 4.39 | 4.84 | 4.09 | 5.20 | 2.00 | 3.61 | 2.86 | 3.99 |
| Down | ENSMUSG00000005268 | -1.48 | 6.19E-04 | Prir          | protein_coding | 7.20 | 6.04 | 5.67 | 7.80 | 5.52 | 5.47 | 4.90 | 6.02 |
| Down | ENSMUSG00000047053 | -3.21 | 6.22E-04 | Teddm1a       | protein_coding | 3.50 | 2.66 | 2.74 | 3.08 | 2.00 | 2.50 | 2.00 | 2.04 |
| Down | ENSMUSG00000038963 | -1.57 | 6.22E-04 | Sloca4a1      | protein_coding | 4.39 | 4.34 | 3.84 | 4.12 | 3.35 | 2.53 | 3.30 | 3.23 |
| Down | ENSMUSG00000041849 | -1.65 | 6.24E-04 | Card6         | protein_coding | 6.02 | 5.74 | 5.77 | 5.65 | 5.02 | 2.70 | 3.97 | 4.77 |
| Down | ENSMUSG00000058396 | -1.39 | 6.26E-04 | Gpr182        | protein_coding | 4.22 | 4.34 | 4.91 | 4.63 | 2.66 | 3.80 | 3.07 | 4.08 |
| Down | ENSMUSG0000002249  | -1.76 | 6.29E-04 | Tpa33         | protein_coding | 4.18 | 4.05 | 3.80 | 3.53 | 2.82 | 3.56 | 3.17 | 3.56 |
| Down | ENSMUSG00000050771 | -3.31 | 6.32E-04 | Tmem37        | protein_coding | 3.10 | 2.43 | 3.10 | 3.08 | 2.00 | 2.35 | 2.00 | 2.35 |
| Down | ENSMUSG00000032530 | -1.53 | 6.45E-04 | Lyz4          | protein_coding | 3.50 | 3.97 | 4.34 | 3.50 | 2.74 | 2.53 | 3.13 | 3.23 |
| Down | ENSMUSG00000044937 | -1.23 | 6.45E-04 | Ttc1          | protein_coding | 4.67 | 4.86 | 4.68 | 4.96 | 4.06 | 3.35 | 4.20 | 4.20 |
| Down | ENSMUSG00000021469 | -2.71 | 6.55E-04 | Mx2           | protein_coding | 3.91 | 3.73 | 3.30 | 3.15 | 2.00 | 2.12 | 2.45 | 2.78 |
| Up   | ENSMUSG00000028024 | 1.61  | 6.63E-04 | Enpep         | protein_coding | 4.03 | 3.63 | 4.70 | 4.39 | 6.11 | 5.50 | 5.84 | 4.75 |
| Down | ENSMUSG00000090145 | -1.64 | 6.65E-04 | Ugt1a6b       | protein_coding | 5.28 | 5.08 | 5.15 | 5.09 | 3.50 | 4.54 | 3.24 | 3.62 |
| Down | ENSMUSG00000019588 | -3.02 | 6.66E-04 | Lnp1          | protein_coding | 3.31 | 3.19 | 4.20 | 3.78 | 2.00 | 2.34 | 2.44 | 2.44 |
| Down | ENSMUSG00000038775 | -1.50 | 7.02E-04 | Vill          | protein_coding | 4.18 | 4.01 | 3.93 | 4.09 | 3.04 | 3.28 | 2.54 | 3.34 |
| Down | ENSMUSG00000028597 | -1.99 | 7.05E-04 | Gpx7          | protein_coding | 4.03 | 4.13 | 4.20 | 4.45 | 3.17 | 2.85 | 2.54 | 3.29 |
| Down | ENSMUSG00000045237 | 1.07  | 7.09E-04 | 1110012L19Rik | protein_coding | 5.10 | 4.58 | 4.80 | 4.91 | 5.32 | 6.06 | 6.14 | 5.60 |
| Up   | ENSMUSG00000033634 | -4.42 | 7.09E-04 | Nat8l2        | protein_coding | 3.91 | 2.86 | 3.43 | 3.82 | 2.00 | 2.00 | 2.00 | 2.44 |
| Down | ENSMUSG00000036598 | -1.36 | 7.09E-04 | Ccdc113       | protein_coding | 4.15 | 4.91 | 4.87 | 5.14 | 3.66 | 3.73 | 2.71 | 4.43 |
| Up   | ENSMUSG00000037305 | 1.56  | 7.11E-04 | Cenps         | protein_coding | 3.50 | 4.09 | 4.24 | 3.80 | 5.86 | 5.39 | 4.38 | 5.02 |
| Down | ENSMUSG00000032249 | -1.84 | 7.12E-04 | Cd4           | protein_coding | 3.18 | 3.83 | 3.75 | 3.27 | 2.00 | 2.62 | 3.23 | 3.17 |
| Up   | ENSMUSG00000023947 | 1.17  | 7.14E-04 | Nkfbie        | protein_coding | 5.00 | 5.08 | 4.87 | 4.29 | 6.13 | 5.82 | 6.07 | 6.07 |
| Down | ENSMUSG00000027868 | -2.39 | 7.16E-04 | Tbx15         | protein_coding | 3.61 | 3.97 | 4.05 | 4.25 | 2.00 | 3.17 | 2.44 | 2.44 |
| Down | ENSMUSG00000044634 | -1.42 | 7.16E-04 | Pkd11l        | protein_coding | 4.54 | 5.40 | 5.24 | 5.40 | 3.96 | 3.47 | 4.45 | 3.99 |
| Down | ENSMUSG00000055978 | -1.84 | 7.23E-04 | Fut2          | protein_coding | 3.67 | 4.34 | 3.43 | 3.94 | 2.57 | 2.44 | 3.30 | 2.78 |
| Down | ENSMUSG00000089675 | -1.65 | 7.30E-04 | Ugt1a8        | protein_coding | 5.36 | 5.23 | 5.15 | 5.11 | 3.60 | 4.44 | 3.24 | 3.89 |
| Down | ENSMUSG00000082766 | -3.07 | 7.33E-04 | 1700064H15Rik | protein_coding | 2.85 | 2.76 | 2.84 | 3.33 | 2.13 | 2.34 | 2.00 | 2.12 |
| Down | ENSMUSG00000047286 | -4.11 | 7.42E-04 | Olfr370       | protein_coding | 3.95 | 3.52 | 3.80 | 3.78 | 2.47 | 2.00 | 2.13 | 2.12 |
| Down | ENSMUSG00000022617 | -4.08 | 7.44E-04 | Chkb          | protein_coding | 3.31 | 2.43 | 3.30 | 3.21 | 2.00 | 2.00 | 2.35 | 2.00 |
| Down | ENSMUSG00000026668 | -1.98 | 7.51E-04 | Dennd1c       | protein_coding | 3.61 | 4.41 | 4.65 | 4.55 | 2.74 | 2.92 | 3.07 | 3.34 |
| Down | ENSMUSG00000059994 | -4.46 | 7.55E-04 | Tyrl1         | protein_coding | 3.67 | 3.52 | 3.30 | 3.82 | 2.13 | 2.00 | 2.00 | 2.00 |
| Down | ENSMUSG00000095990 | -1.43 | 7.57E-04 | Zfp97         | protein_coding | 4.62 | 4.24 | 4.05 | 4.98 | 3.73 | 3.91 | 3.00 | 2.99 |
| Down | ENSMUSG00000024300 | -1.33 | 7.57E-04 | Myo1f         | protein_coding | 5.19 | 5.08 | 4.87 | 4.60 | 3.60 | 3.80 | 4.16 | 3.89 |
| Down | ENSMUSG00000052759 | -1.24 | 7.60E-04 | Gpr25         | protein_coding | 5.00 | 4.93 | 4.54 | 5.07 | 3.23 | 3.73 | 4.50 | 3.85 |
| Up   | ENSMUSG00000064282 | -3.51 | 7.79E-04 | Gimap8        | protein_coding | 2.94 | 2.78 | 3.43 | 3.55 | 2.25 | 2.00 | 2.24 | 2.24 |
| Down | ENSMUSG00000027880 | -4.39 | 7.80E-04 | Slc25a54      | protein_coding | 2.65 | 3.92 | 3.54 | 3.74 | 2.00 | 2.00 | 2.00 | 2.44 |
| Down | ENSMUSG00000036523 | -1.45 | 7.85E-04 | Greb1         | protein_coding | 4.36 | 4.86 | 4.87 | 4.37 | 2.90 | 2.92 | 3.30 | 4.43 |
| Down | ENSMUSG00000029307 | -1.42 | 7.98E-04 | Dmp1          | protein_coding | 5.06 | 5.67 | 5.55 | 5.25 | 4.25 | 4.13 | 4.19 | 4.20 |
| Down | ENSMUSG00000028776 | -2.27 | 8.13E-04 | Tinagl1       | protein_coding | 3.77 | 3.39 | 4.13 | 3.90 | 2.57 | 2.24 | 2.00 | 3.29 |
| Down | ENSMUSG00000044322 | -2.51 | 8.14E-04 | Dsc1          | protein_coding | 3.67 | 4.37 | 3.97 | 4.48 | 2.25 | 3.22 | 2.13 | 2.85 |
| Down | ENSMUSG00000020241 | -1.98 | 8.21E-04 | Col6a2        | protein_coding | 4.59 | 4.56 | 5.48 | 5.07 | 2.97 | 3.56 | 2.35 | 4.25 |
| Down | ENSMUSG00000020865 | -1.45 | 8.29E-04 | Abcc3         | protein_coding | 4.48 | 4.41 | 4.80 | 4.78 | 3.23 | 2.53 | 3.87 | 4.05 |
| Down | ENSMUSG00000035352 | -6.08 | 8.32E-04 | Ccl12         | protein_coding | 2.85 | 3.88 | 2.74 | 2.49 | 2.00 | 2.00 | 2.00 | 2.00 |
| Down | ENSMUSG00000071552 | -3.23 | 8.35E-04 | Tigit         | protein_coding | 3.31 | 3.39 | 3.23 | 3.74 | 2.00 | 2.00 | 2.78 | 2.00 |
| Down | ENSMUSG00000025515 | -1.96 | 8.36E-04 | Muc2          | protein_coding | 3.95 | 3.44 | 4.57 | 4.31 | 2.13 | 3.05 | 2.86 | 3.62 |
| Down | ENSMUSG00000037813 | -1.02 | 8.37E-04 | D630003M21Rik | protein_coding | 4.84 | 4.79 | 5.04 | 4.65 | 3.77 | 3.38 | 4.40 | 4.25 |
| Down | ENSMUSG00000030215 | -3.50 | 8.41E-04 | Ins2          | protein_coding | 2.85 | 3.70 | 3.86 | 3.65 | 2.00 | 2.00 | 2.00 | 2.00 |
| Up   | ENSMUSG00000017446 | 1.33  | 8.44E-04 | C1orf11       | protein_coding | 3.95 | 4.69 | 5.74 | 4.80 | 5.74 | 5.33 | 5.51 | 5.79 |
| Down | ENSMUSG00000055994 | -1.84 | 8.45E-04 | Nod2          | protein_coding | 4.32 | 4.89 | 3.65 | 4.53 | 2.90 | 2.98 | 2.44 | 3.92 |
| Down | ENSMUSG00000059901 | -2.22 | 8.53E-04 | Adams14       | protein_coding | 3.72 | 4.74 | 4.54 | 4.50 | 3.23 | 3.11 | 2.13 | 3.12 |
| Down | ENSMUSG00000050569 | -1.86 | 8.54E-04 | Rab39         | protein_coding | 4.26 | 4.01 | 4.65 | 4.55 | 3.23 | 3.17 | 2.86 | 3.17 |
| Down | ENSMUSG00000030775 | -2.39 | 8.59E-04 | Trat1         | protein_coding | 3.38 | 3.33 | 3.70 | 3.50 | 2.25 | 2.00 | 2.24 | 2.99 |
| Down | ENSMUSG00000047904 | -1.18 | 8.62E-04 | Sstr2         | protein_coding | 5.70 | 5.71 | 5.78 | 6.04 | 3.45 | 5.00 | 4.30 | 5.02 |
| Down | ENSMUSG00000046718 | -4.00 | 8.74E-04 | Bst1          | protein_coding | 2.43 | 3.52 | 3.97 | 3.65 | 2.00 | 2.00 | 2.00 | 2.54 |
| Down | ENSMUSG00000027386 | -2.31 | 8.76E-04 | Fbln7         | protein_coding | 4.45 | 5.02 | 4.70 | 4.86 | 2.37 | 2.70 | 3.85 | 3.96 |
| Down | ENSMUSG00000109764 | -2.67 | 8.77E-04 | Klkb1         | protein_coding | 3.56 | 4.37 | 3.30 | 3.44 | 2.57 | 2.12 | 2.71 | 2.70 |
| Down | ENSMUSG00000091620 | -2.62 | 8.79E-04 | Vmn2r23       | protein_coding | 4.42 | 4.56 | 4.43 | 5.25 | 2.13 | 3.61 | 2.45 | 3.06 |
| Down | ENSMUSG00000024670 | -1.99 | 8.84E-04 | Cd6           | protein_coding | 3.31 | 4.44 | 4.13 | 4.65 | 2.90 | 2.00 | 3.13 | 3.39 |
| Down | ENSMUSG00000061171 | -3.21 | 8.88E-04 | Slc38a11      | protein_coding | 3.77 | 4.05 | 3.49 | 3.90 | 2.00 | 2.00 | 2.00 | 3.00 |
| Down | ENSMUSG00000073771 | -1.10 | 8.91E-04 | Btd19         | protein_coding | 5.08 | 4.79 | 5.15 | 4.91 | 4.72 | 3.84 | 3.35 | 4.08 |
| Down | ENSMUSG00000094308 | -4.82 | 9.01E-04 | 2410137M14Rik | protein_coding | 2.65 | 2.76 | 2.42 | 2.38 | 2.00 | 2.00 | 2.00 | 2.00 |
| Down | ENSMUSG0000006     |       |          |               |                |      |      |      |      |      |      |      |      |



|      |                     |       |          |          |                |      |      |      |      |      |      |      |      |
|------|---------------------|-------|----------|----------|----------------|------|------|------|------|------|------|------|------|
| Up   | ENSMUSG00000045775  | 1.22  | 9.20E-04 | Slc16a5  | protein_coding | 3.67 | 4.09 | 3.49 | 4.19 | 5.01 | 5.00 | 5.14 | 4.11 |
| Down | ENSMUSG00000099517  | -4.18 | 9.23E-04 | Hist1h3g | protein_coding | 2.54 | 2.55 | 2.93 | 2.27 | 2.00 | 2.12 | 2.00 | 2.00 |
| Down | ENSMUSG00000090165  | -1.64 | 9.23E-04 | Ugt1a10  | protein_coding | 5.23 | 5.04 | 5.24 | 5.12 | 4.44 | 4.44 | 3.24 | 3.62 |
| Down | ENSMUSG00000073791  | -1.56 | 9.32E-04 | Efcab7   | protein_coding | 4.29 | 4.24 | 4.97 | 4.78 | 2.47 | 3.43 | 3.54 | 3.95 |
| Down | ENSMUSG00000027790  | -3.23 | 9.38E-04 | Sis      | protein_coding | 3.91 | 4.79 | 4.01 | 4.45 | 2.40 | 2.24 | 2.93 | 2.70 |
| Down | ENSMUSG00000009628  | -1.59 | 9.49E-04 | Tex15    | protein_coding | 4.57 | 5.12 | 4.49 | 5.34 | 2.25 | 4.37 | 3.87 | 3.44 |
| Down | ENSMUSG00000032364  | -1.46 | 9.55E-04 | Igdc3    | protein_coding | 5.19 | 4.74 | 5.19 | 5.12 | 4.63 | 4.63 | 4.20 | 2.63 |
| Down | ENSMUSG00000029499  | -2.50 | 9.56E-04 | Fhmp2    | protein_coding | 4.91 | 4.61 | 4.30 | 4.42 | 3.35 | 2.00 | 3.35 | 2.54 |
| Down | ENSMUSG00000030800  | -1.93 | 9.65E-04 | Prss8    | protein_coding | 3.81 | 2.95 | 3.36 | 4.09 | 2.13 | 2.44 | 2.63 | 3.12 |
| Down | ENSMUSG00000036151  | -2.64 | 9.67E-04 | Tm6st2   | protein_coding | 4.15 | 3.46 | 3.43 | 2.59 | 2.13 | 2.34 | 2.00 | 2.85 |
| Down | ENSMUSG00000019737  | -2.53 | 9.73E-04 | Syne4    | protein_coding | 3.10 | 3.19 | 3.84 | 3.50 | 2.25 | 2.00 | 2.13 | 2.92 |
| Down | ENSMUSG00000057054  | -1.08 | 9.81E-04 | Inca1    | protein_coding | 5.17 | 5.23 | 4.65 | 4.94 | 4.19 | 4.16 | 4.35 | 3.70 |
| Down | ENSMUSG00000070332  | -3.72 | 9.88E-04 | Trim80   | protein_coding | 3.44 | 3.19 | 2.74 | 3.15 | 2.37 | 2.00 | 2.00 | 2.12 |
| Down | ENSMUSG00000024727  | -1.55 | 9.89E-04 | Trpm6    | protein_coding | 5.34 | 5.14 | 4.85 | 5.42 | 2.90 | 3.87 | 4.10 | 4.43 |
| Down | ENSMUSG00000005397  | -1.22 | 1.00E-03 | Nid1     | protein_coding | 5.34 | 4.77 | 5.49 | 5.97 | 4.44 | 3.94 | 3.75 | 4.77 |
| Down | ENSMUSG00000091491  | -2.18 | 1.01E-03 | Vmn2r97  | protein_coding | 4.51 | 4.97 | 4.49 | 4.98 | 2.47 | 3.05 | 3.45 | 3.53 |
| Down | ENSMUSG00000040280  | -2.17 | 1.01E-03 | Ndufa4i2 | protein_coding | 3.31 | 3.57 | 3.43 | 3.33 | 2.97 | 2.44 | 2.24 | 2.00 |
| Down | ENSMUSG00000050493  | -5.10 | 1.02E-03 | Fam167b  | protein_coding | 3.31 | 2.76 | 3.01 | 2.69 | 2.00 | 2.00 | 2.00 | 2.12 |
| Down | ENSMUSG00000072934  | -3.53 | 1.02E-03 | Trpc5os  | protein_coding | 2.54 | 2.95 | 3.65 | 3.90 | 2.00 | 2.00 | 2.62 | 2.90 |
| Down | ENSMUSG00000052013  | -2.35 | 1.02E-03 | Bta1     | protein_coding | 3.95 | 3.33 | 4.01 | 3.27 | 2.00 | 2.70 | 2.24 | 2.70 |
| Up   | ENSMUSG00000047759  | 1.23  | 1.04E-03 | Hs3t3a1  | protein_coding | 3.95 | 4.50 | 4.65 | 5.11 | 4.62 | 5.38 | 4.72 | 5.38 |
| Down | ENSMUSG00000061397  | -4.14 | 1.04E-03 | Krt79    | protein_coding | 3.25 | 3.57 | 3.36 | 3.33 | 2.00 | 2.00 | 2.24 | 2.24 |
| Down | ENSMUSG000000096201 | -3.29 | 1.04E-03 | Gm10715  | protein_coding | 8.98 | 9.43 | 9.04 | 9.73 | 5.56 | 6.14 | 5.07 | 6.99 |
| Down | ENSMUSG00000068788  | -3.64 | 1.05E-03 | Map7d3   | protein_coding | 2.30 | 3.11 | 3.75 | 4.02 | 2.00 | 2.00 | 2.13 | 2.54 |
| Down | ENSMUSG00000070423  | -5.20 | 1.07E-03 | Olfir558 | protein_coding | 3.18 | 3.19 | 3.70 | 3.55 | 2.00 | 2.00 | 2.24 | 2.00 |
| Down | ENSMUSG00000037437  | -1.74 | 1.07E-03 | Adam32   | protein_coding | 4.51 | 4.77 | 4.91 | 4.42 | 4.19 | 2.62 | 2.24 | 3.66 |
| Down | ENSMUSG00000004988  | -1.27 | 1.07E-03 | Fxyd4    | protein_coding | 3.44 | 4.01 | 4.24 | 4.09 | 2.90 | 2.44 | 3.54 | 3.44 |
| Down | ENSMUSG00000035582  | -2.44 | 1.08E-03 | Gdpd4    | protein_coding | 4.54 | 4.27 | 4.20 | 4.37 | 2.97 | 2.34 | 2.35 | 3.34 |
| Down | ENSMUSG00000040429  | -1.13 | 1.08E-03 | Mterf1a  | protein_coding | 4.82 | 4.89 | 4.73 | 4.92 | 3.04 | 4.04 | 4.27 | 4.08 |
| Down | ENSMUSG00000090175  | -1.64 | 1.09E-03 | Ugt1a9   | protein_coding | 5.24 | 5.12 | 5.11 | 5.05 | 3.50 | 4.44 | 3.24 | 3.74 |
| Down | ENSMUSG00000050919  | -1.30 | 1.09E-03 | Zfp266   | protein_coding | 4.32 | 4.56 | 4.57 | 4.78 | 2.90 | 4.13 | 3.63 | 3.39 |
| Down | ENSMUSG000000105518 | -3.31 | 1.10E-03 | Gm42674  | protein_coding | 2.54 | 3.19 | 3.16 | 3.33 | 2.00 | 2.00 | 2.00 | 2.54 |
| Down | ENSMUSG00000035468  | -2.50 | 1.10E-03 | Cdca1    | protein_coding | 3.25 | 4.20 | 4.09 | 4.02 | 2.00 | 2.53 | 2.63 | 2.90 |
| Down | ENSMUSG00000110332  | -2.10 | 1.10E-03 | Gm19935  | protein_coding | 5.33 | 4.67 | 4.54 | 5.19 | 2.00 | 3.11 | 3.89 | 2.00 |
| Down | ENSMUSG00000035095  | -1.29 | 1.10E-03 | Fam167a  | protein_coding | 4.22 | 4.74 | 4.43 | 5.11 | 3.77 | 3.84 | 2.93 | 3.95 |
| Down | ENSMUSG00000034810  | -1.04 | 1.10E-03 | Scn7a    | protein_coding | 4.84 | 5.52 | 5.43 | 5.55 | 3.64 | 4.72 | 4.90 | 4.28 |
| Down | ENSMUSG00000019779  | -3.22 | 1.11E-03 | Frk      | protein_coding | 3.91 | 4.20 | 3.43 | 4.48 | 2.00 | 2.44 | 2.00 | 2.99 |
| Down | ENSMUSG00000030263  | -1.93 | 1.11E-03 | Lrmp     | protein_coding | 3.86 | 4.05 | 4.09 | 4.70 | 2.82 | 3.65 | 2.00 | 2.92 |
| Down | ENSMUSG00000021763  | -1.36 | 1.11E-03 | BC067074 | protein_coding | 5.04 | 4.69 | 5.00 | 5.30 | 2.82 | 3.43 | 4.27 | 4.53 |
| Down | ENSMUSG00000000359  | -4.90 | 1.12E-03 | Rem1     | protein_coding | 2.43 | 2.95 | 2.42 | 2.49 | 2.00 | 2.00 | 2.00 | 2.00 |
| Down | ENSMUSG00000089960  | -1.70 | 1.12E-03 | Ugt1a1   | protein_coding | 5.58 | 5.53 | 5.60 | 5.69 | 3.55 | 5.04 | 3.50 | 3.92 |
| Down | ENSMUSG00000026042  | -1.54 | 1.13E-03 | Col5a2   | protein_coding | 5.06 | 5.14 | 4.82 | 5.30 | 3.92 | 4.10 | 3.00 | 4.08 |
| Down | ENSMUSG00000041718  | -1.05 | 1.13E-03 | Alg13    | protein_coding | 5.57 | 5.89 | 6.05 | 5.97 | 5.52 | 4.66 | 5.79 | 5.23 |
| Down | ENSMUSG00000002100  | -2.14 | 1.15E-03 | Mybpc3   | protein_coding | 3.50 | 4.05 | 4.01 | 3.78 | 2.25 | 2.00 | 3.07 | 3.06 |
| Down | ENSMUSG00000004688  | -2.01 | 1.15E-03 | Abca13   | protein_coding | 5.44 | 5.28 | 5.80 | 5.74 | 4.47 | 2.62 | 3.19 | 4.53 |
| Down | ENSMUSG00000006811  | -1.92 | 1.15E-03 | Mkrc2os  | protein_coding | 4.87 | 4.37 | 4.05 | 3.69 | 2.66 | 3.33 | 2.13 | 3.53 |
| Down | ENSMUSG00000015405  | -2.70 | 1.16E-03 | Acp2     | protein_coding | 3.02 | 3.89 | 4.46 | 2.97 | 2.44 | 2.00 | 2.71 | 2.44 |
| Down | ENSMUSG00000039304  | -2.61 | 1.16E-03 | Tnfrsf10 | protein_coding | 3.61 | 3.97 | 3.89 | 4.45 | 2.13 | 2.00 | 2.63 | 3.12 |
| Down | ENSMUSG00000026976  | -3.10 | 1.17E-03 | Pax8     | protein_coding | 4.42 | 4.50 | 3.93 | 3.99 | 2.37 | 2.34 | 3.12 | 3.12 |
| Down | ENSMUSG00000026630  | -2.72 | 1.17E-03 | Batf3    | protein_coding | 3.44 | 3.11 | 3.43 | 3.27 | 2.00 | 2.12 | 2.24 | 2.70 |
| Down | ENSMUSG00000000290  | -1.51 | 1.17E-03 | Irgb2    | protein_coding | 4.93 | 4.91 | 4.75 | 4.37 | 2.74 | 3.17 | 3.97 | 4.08 |
| Down | ENSMUSG00000061882  | -1.22 | 1.17E-03 | Ccdc62   | protein_coding | 5.19 | 5.21 | 5.26 | 5.25 | 3.29 | 3.47 | 4.65 | 4.77 |
| Down | ENSMUSG00000022144  | -2.70 | 1.18E-03 | Gdnf     | protein_coding | 3.77 | 3.57 | 3.09 | 3.69 | 2.37 | 2.00 | 2.24 | 2.78 |
| Down | ENSMUSG00000046806  | -1.00 | 1.18E-03 | Cyren    | protein_coding | 5.34 | 4.93 | 5.09 | 4.89 | 4.19 | 4.37 | 3.50 | 4.63 |
| Up   | ENSMUSG00000021278  | 1.04  | 1.20E-03 | Amn      | protein_coding | 3.95 | 4.27 | 4.59 | 3.98 | 5.07 | 5.52 | 4.95 | 4.46 |
| Down | ENSMUSG00000028174  | -2.62 | 1.20E-03 | Rpe65    | protein_coding | 3.38 | 4.09 | 3.49 | 3.55 | 2.97 | 2.00 | 2.54 | 2.00 |
| Down | ENSMUSG00000025407  | -1.45 | 1.20E-03 | Gli1     | protein_coding | 4.36 | 5.04 | 4.70 | 3.74 | 2.85 | 3.19 | 3.78 | 3.74 |
| Down | ENSMUSG00000037995  | -1.24 | 1.21E-03 | Igsf9    | protein_coding | 4.57 | 4.20 | 4.24 | 3.57 | 3.33 | 3.33 | 3.24 | 3.90 |
| Up   | ENSMUSG00000078963  | 1.62  | 1.26E-03 | Hsbp111  | protein_coding | 3.50 | 3.33 | 2.74 | 3.65 | 4.94 | 4.37 | 4.65 | 3.95 |
| Up   | ENSMUSG00000047281  | 1.62  | 1.26E-03 | Sfn      | protein_coding | 3.86 | 3.02 | 3.84 | 3.39 | 5.20 | 3.43 | 5.66 | 5.17 |
| Down | ENSMUSG00000068335  | -4.08 | 1.26E-03 | Dok1     | protein_coding | 2.94 | 3.03 | 3.93 | 3.27 | 2.00 | 2.00 | 2.45 | 2.00 |
| Down | ENSMUSG00000041361  | -2.02 | 1.26E-03 | Myzap    | protein_coding | 4.48 | 4.74 | 4.40 | 4.89 | 3.69 | 2.44 | 2.00 | 3.85 |
| Down | ENSMUSG00000022408  | -4.36 | 1.27E-03 | Fam83f   | protein_coding | 3.18 | 3.88 | 2.84 | 2.94 | 2.00 | 2.00 | 2.24 | 2.12 |
| Down | ENSMUSG00000031230  | -2.68 | 1.27E-03 | Fgf16    | protein_coding | 4.18 | 4.17 | 4.34 | 3.39 | 2.00 | 2.92 | 2.13 | 2.99 |
| Down | ENSMUSG00000025902  | -1.71 | 1.27E-03 | Sox17    | protein_coding | 4.03 | 4.31 | 3.70 | 3.74 | 2.82 | 3.11 | 2.54 | 3.12 |
| Down | ENSMUSG00000063564  | -1.55 | 1.27E-03 | Col23a1  | protein_coding | 5.82 | 6.63 | 5.99 | 6.73 | 5.80 | 4.76 | 3.24 | 4.88 |
| Down | ENSMUSG00000073492  | -3.75 | 1.28E-03 | Gm10521  | protein_coding | 2.94 | 4.01 | 3.84 | 2.86 | 2.00 | 2.12 | 2.00 | 2.54 |
| Down | ENSMUSG00000018927  | -2.64 | 1.29E-03 | Ccl6     | protein_coding | 4.42 | 4.44 | 4.05 | 3.39 | 3.45 | 2.00 | 2.24 | 2.34 |
| Down | ENSMUSG00000041731  | -1.20 | 1.29E-03 | Pgm5     | protein_coding | 4.59 | 5.02 | 4.93 | 5.28 | 3.64 | 3.22 | 4.73 | 3.95 |
| Down | ENSMUSG00000041779  | -1.05 | 1.29E-03 | Tram2    | protein_coding | 5.33 | 5.06 | 4.95 | 5.55 | 3.77 | 4.54 | 5.05 | 4.81 |
| Down | ENSMUSG00000021213  | -3.91 | 1.30E-03 | Akrtc13  | protein_coding | 3.18 | 3.52 | 4.01 | 3.60 | 2.00 | 2.00 | 2.00 | 2.62 |
| Down | ENSMUSG00000038384  | -2.28 | 1.30E-03 | Olfir239 | protein_coding | 3.31 | 3.46 | 3.09 | 3.50 | 2.00 | 2.44 | 2.45 | 2.62 |
| Down | ENSMUSG00000037762  | -1.67 | 1.30E-03 | Slc16a9  | protein_coding | 3.95 | 4.41 | 3.93 | 3.92 | 3.29 | 3.05 | 3.12 | 3.86 |
| Up   | ENSMUSG00000050603  | 1.65  | 1.31E-03 | Klf6     | protein_coding | 2.94 | 3.68 | 3.97 | 3.15 | 4.44 | 4.85 | 4.50 | 5.08 |
| Down | ENSMUSG00000039391  | -2.35 | 1.31E-03 | Ccdc81   | protein_coding | 4.29 | 4.91 | 4.95 | 4.80 | 2.82 | 2.24 | 2.24 | 4.11 |
| Down | ENSMUSG00000055799  | -2.29 | 1.32E-03 | Tcf7l1   | protein_coding | 5.62 | 5.62 | 5.43 | 6.00 | 3.96 | 3.17 | 2.00 | 4.72 |
| Down | ENSMUSG00000021898  | -1.87 | 1.32E-03 | Asb14    | protein_coding | 3.81 | 4.50 | 3.75 | 3.69 | 3.11 | 2.44 | 2.13 | 3.39 |
| Down | ENSMUSG00000079434  | -1.21 | 1.32E-03 | Neu2     | protein_coding | 6.52 | 6.32 | 6.18 | 6.33 | 4.42 | 5.96 | 3.97 | 5.64 |
| Down | ENSMUSG00000020901  | -1.04 | 1.32E-03 | Pik3r5   | protein_coding | 5.36 | 5.02 | 4.78 | 5.27 | 3.69 | 4.27 | 4.45 | 4.46 |
| Down | ENSMUSG00000109228  | -2.49 | 1.33E-03 | Fam81b   | protein_coding | 4.22 | 3.68 | 4.01 | 4.34 | 2.90 | 2.00 | 2.45 | 3.06 |
| Down | ENSMUSG00000022468  | -2.44 | 1.33E-03 | Endou    | protein_coding | 3.61 | 3.78 | 4.13 | 4.34 | 2.90 | 2.00 | 2.00 | 3.23 |
| Down | ENSMUSG00000052850  | -5.21 | 1.34E-03 | Tas2r137 | protein_coding | 2.30 | 2.43 | 2.84 | 3.08 | 2.00 | 2.00 | 2.00 | 2.00 |
| Down | ENSMUSG00000030945  | -2.37 | 1.34E-03 | Acsm2    | protein_coding | 4.32 | 4.84 | 4.63 | 5.14 | 2.24 | 2.24 | 2.79 | 2.79 |
| Down | ENSMUSG00000005373  | -1.49 | 1.34E-03 | Mlxip1   | protein_coding | 4.22 | 4.56 | 4.40 | 4.50 | 2.13 | 3.77 | 3.30 | 3.70 |
| Down | ENSMUSG00000051617  | -1.00 | 1.34E-03 | Krt9     | protein_coding | 5.33 | 5.26 | 5.57 | 5.53 | 4.78 | 4.64 | 4.33 | 4.43 |
| Down | ENSMUSG00000047040  | -1.87 | 1.35E-03 | Prr15l   | protein_coding | 3.99 | 2.95 | 4.13 | 3.74 | 2.00 | 2.44 | 3.19 | 2.99 |
| Down | ENSMUSG00000053688  | -1.61 | 1.35E-03 | Rab7b    | protein_coding | 5.00 | 4.01 | 4.43 | 4.63 | 2.00 | 3.43 | 3.83 | 3.86 |
| Down | ENSMUSG00000032254  |       |          |          |                |      |      |      |      |      |      |      |      |

|      |                     |       |          |               |                |      |      |      |      |      |      |      |      |
|------|---------------------|-------|----------|---------------|----------------|------|------|------|------|------|------|------|------|
| Down | ENSMUSG00000043015  | -1.08 | 1.37E-03 | Nemp2         | protein_coding | 5.06 | 5.52 | 5.27 | 5.28 | 4.03 | 3.22 | 4.38 | 5.17 |
| Down | ENSMUSG00000079494  | -3.08 | 1.38E-03 | Nat8f5        | protein_coding | 2.65 | 3.03 | 3.01 | 3.15 | 2.00 | 2.00 | 2.00 | 2.54 |
| Down | ENSMUSG00000001435  | -1.83 | 1.38E-03 | Col18a1       | protein_coding | 4.32 | 4.09 | 4.63 | 5.02 | 2.00 | 3.17 | 2.13 | 4.25 |
| Down | ENSMUSG00000025492  | -2.30 | 1.41E-03 | Ilfm3         | protein_coding | 5.15 | 5.08 | 4.52 | 4.53 | 3.45 | 3.61 | 2.54 | 2.85 |
| Up   | ENSMUSG000000061878 | 1.22  | 1.42E-03 | Sphk1         | protein_coding | 4.42 | 3.33 | 3.49 | 4.05 | 4.56 | 4.96 | 5.00 | 4.92 |
| Down | ENSMUSG000000042251 | -1.89 | 1.46E-03 | Pm20d1        | protein_coding | 4.65 | 4.62 | 5.02 | 4.72 | 3.29 | 3.73 | 2.13 | 3.85 |
| Down | ENSMUSG00000003024  | -1.83 | 1.47E-03 | Lag3          | protein_coding | 4.07 | 4.09 | 3.97 | 3.94 | 2.00 | 2.92 | 2.45 | 2.85 |
| Down | ENSMUSG00000056854  | -1.23 | 1.47E-03 | Pou3f4        | protein_coding | 4.87 | 4.72 | 5.53 | 5.33 | 4.61 | 2.78 | 4.16 | 4.36 |
| Down | ENSMUSG00000047420  | -3.62 | 1.48E-03 | Fam180a       | protein_coding | 2.43 | 2.66 | 3.01 | 3.82 | 2.13 | 2.12 | 2.00 | 2.24 |
| Down | ENSMUSG00000091805  | -2.51 | 1.48E-03 | Vmn2r108      | protein_coding | 4.11 | 4.69 | 4.17 | 4.19 | 3.11 | 2.78 | 2.24 | 2.70 |
| Down | ENSMUSG00000090336  | -2.16 | 1.48E-03 | Cfap97d2      | protein_coding | 4.18 | 4.41 | 4.57 | 4.92 | 2.00 | 3.05 | 3.35 | 3.44 |
| Up   | ENSMUSG000000037977 | 1.09  | 1.51E-03 | 6430571L13Rik | protein_coding | 4.84 | 4.74 | 3.89 | 4.96 | 5.29 | 5.80 | 5.86 | 5.50 |
| Down | ENSMUSG00000054293  | -5.29 | 1.51E-03 | P2ry10b       | protein_coding | 2.85 | 2.30 | 3.43 | 3.39 | 2.13 | 2.00 | 2.00 | 2.00 |
| Down | ENSMUSG000000066273 | -5.10 | 1.51E-03 | Olfir33       | protein_coding | 2.54 | 2.86 | 2.93 | 3.39 | 2.00 | 2.00 | 2.00 | 2.12 |
| Down | ENSMUSG00000057604  | -2.12 | 1.52E-03 | Lmcd1         | protein_coding | 4.18 | 5.02 | 5.04 | 5.05 | 3.35 | 2.24 | 2.63 | 4.17 |
| Down | ENSMUSG00000072722  | -2.10 | 1.52E-03 | Gm6588        | protein_coding | 3.38 | 2.86 | 3.23 | 3.01 | 2.00 | 2.00 | 2.00 | 2.24 |
| Down | ENSMUSG00000043948  | -2.49 | 1.53E-03 | Olfir691      | protein_coding | 2.94 | 4.17 | 3.23 | 3.78 | 2.37 | 2.53 | 2.00 | 2.78 |
| Down | ENSMUSG00000035697  | -1.27 | 1.53E-03 | Arlgap45      | protein_coding | 5.24 | 4.72 | 5.22 | 4.67 | 4.03 | 3.28 | 4.22 | 4.11 |
| Down | ENSMUSG000000064057 | -3.27 | 1.55E-03 | Scgb3a1       | protein_coding | 3.77 | 3.03 | 2.74 | 3.08 | 2.00 | 2.34 | 2.00 | 2.34 |
| Down | ENSMUSG000000223288 | -1.54 | 1.56E-03 | Tll8          | protein_coding | 4.39 | 3.92 | 3.36 | 4.70 | 3.11 | 2.98 | 2.86 | 3.53 |
| Down | ENSMUSG00000019312  | -2.43 | 1.58E-03 | Grt7          | protein_coding | 4.42 | 4.44 | 4.40 | 4.48 | 2.25 | 2.12 | 2.00 | 3.99 |
| Down | ENSMUSG00000030862  | -1.38 | 1.58E-03 | Cpxn2         | protein_coding | 4.54 | 4.86 | 4.43 | 5.16 | 4.00 | 3.80 | 2.45 | 4.05 |
| Down | ENSMUSG000000032034 | -3.47 | 1.60E-03 | Kcnj5         | protein_coding | 3.18 | 3.88 | 3.75 | 3.45 | 2.00 | 2.12 | 2.00 | 2.70 |
| Down | ENSMUSG00000095440  | -1.78 | 1.60E-03 | Figl2         | protein_coding | 3.72 | 3.63 | 3.80 | 3.82 | 2.25 | 2.44 | 2.63 | 3.39 |
| Down | ENSMUSG00000018932  | -1.09 | 1.60E-03 | Map2k3        | protein_coding | 5.48 | 6.01 | 5.70 | 5.64 | 4.97 | 4.07 | 3.71 | 5.54 |
| Down | ENSMUSG00000057464  | -3.33 | 1.61E-03 | Olfir1415     | protein_coding | 3.61 | 3.26 | 2.93 | 3.15 | 2.37 | 2.00 | 2.00 | 2.34 |
| Down | ENSMUSG00000008384  | -1.36 | 1.62E-03 | Sertad1       | protein_coding | 4.95 | 4.58 | 4.05 | 4.98 | 3.81 | 4.13 | 3.07 | 3.34 |
| Down | ENSMUSG00000051977  | -1.29 | 1.62E-03 | Prdm9         | protein_coding | 4.62 | 5.02 | 4.70 | 4.87 | 3.50 | 3.87 | 3.00 | 4.41 |
| Down | ENSMUSG00000058019  | -2.20 | 1.63E-03 | Ces5a         | protein_coding | 3.10 | 3.92 | 3.30 | 3.65 | 2.37 | 2.78 | 2.13 | 2.62 |
| Down | ENSMUSG00000021239  | -4.15 | 1.64E-03 | Vsx2          | protein_coding | 2.85 | 3.03 | 3.30 | 3.33 | 2.00 | 2.00 | 2.00 | 2.34 |
| Down | ENSMUSG000000069301 | -3.49 | 1.65E-03 | Hist1h2ag     | protein_coding | 2.54 | 2.55 | 3.09 | 3.01 | 2.00 | 2.34 | 2.00 | 2.00 |
| Down | ENSMUSG00000026840  | -1.56 | 1.65E-03 | Lamc3         | protein_coding | 4.75 | 3.92 | 4.80 | 4.58 | 3.45 | 3.43 | 2.13 | 4.02 |
| Down | ENSMUSG00000051048  | -1.77 | 1.65E-03 | P4ha3         | protein_coding | 4.82 | 4.30 | 4.30 | 4.30 | 3.43 | 3.50 | 2.86 | 3.53 |
| Down | ENSMUSG00000038644  | -2.24 | 1.67E-03 | Ermap         | protein_coding | 3.61 | 4.58 | 4.65 | 4.02 | 2.00 | 2.25 | 3.62 | 3.50 |
| Down | ENSMUSG00000039476  | -2.35 | 1.71E-03 | Prrx2         | protein_coding | 3.02 | 3.46 | 3.43 | 3.33 | 2.00 | 2.85 | 2.00 | 2.44 |
| Down | ENSMUSG000000035775 | -1.92 | 1.71E-03 | Krt20         | protein_coding | 3.67 | 4.97 | 4.46 | 4.25 | 2.25 | 3.00 | 3.29 | 3.29 |
| Down | ENSMUSG00000044581  | -1.74 | 1.71E-03 | 4932415D10Rik | protein_coding | 4.26 | 4.61 | 5.32 | 5.19 | 3.11 | 3.98 | 3.19 | 3.78 |
| Down | ENSMUSG00000057135  | -3.26 | 1.72E-03 | Scmp          | protein_coding | 3.61 | 2.86 | 4.05 | 3.08 | 2.57 | 2.00 | 2.00 | 2.34 |
| Down | ENSMUSG00000067522  | -2.84 | 1.72E-03 | Olfir76       | protein_coding | 3.77 | 3.78 | 3.93 | 4.15 | 2.57 | 2.44 | 2.00 | 2.78 |
| Down | ENSMUSG000000031875 | -1.70 | 1.72E-03 | Cmtm3         | protein_coding | 4.84 | 4.72 | 5.22 | 5.09 | 2.82 | 2.53 | 4.73 | 3.39 |
| Down | ENSMUSG00000040189  | -1.02 | 1.72E-03 | Ccdc114       | protein_coding | 5.29 | 5.31 | 4.80 | 4.87 | 4.52 | 4.01 | 3.87 | 4.43 |
| Down | ENSMUSG00000073489  | -3.87 | 1.73E-03 | Ifi204        | protein_coding | 3.44 | 3.52 | 3.30 | 4.09 | 2.66 | 2.00 | 2.00 | 2.00 |
| Down | ENSMUSG00000027744  | -3.67 | 1.74E-03 | Stoml3        | protein_coding | 4.03 | 4.44 | 4.13 | 3.94 | 2.00 | 2.70 | 2.00 | 2.54 |
| Down | ENSMUSG000000115091 | -5.02 | 1.77E-03 | Vmn1r22       | protein_coding | 2.65 | 3.73 | 3.09 | 2.13 | 2.00 | 3.55 | 2.00 | 2.12 |
| Down | ENSMUSG00000047642  | -1.99 | 1.77E-03 | D930020B18Rik | protein_coding | 4.29 | 4.56 | 3.54 | 4.25 | 2.57 | 3.38 | 2.00 | 3.34 |
| Up   | ENSMUSG000000027857 | 1.10  | 1.78E-03 | Tshb          | protein_coding | 3.99 | 4.64 | 4.78 | 4.80 | 5.47 | 6.04 | 5.38 | 5.17 |
| Down | ENSMUSG000000078491 | -2.26 | 1.78E-03 | Vmn2r56       | protein_coding | 4.26 | 4.09 | 4.30 | 2.57 | 3.00 | 2.92 | 2.44 | 3.06 |
| Down | ENSMUSG000000068323 | -1.87 | 1.78E-03 | Slc4a5        | protein_coding | 5.57 | 4.61 | 4.05 | 6.28 | 3.50 | 3.05 | 3.71 | 4.61 |
| Down | ENSMUSG000000027326 | -1.44 | 1.78E-03 | Kn11          | protein_coding | 3.86 | 4.50 | 4.30 | 4.91 | 2.57 | 3.91 | 3.63 | 3.12 |
| Down | ENSMUSG00000071192  | -1.95 | 1.81E-03 | Wfikkn1       | protein_coding | 2.94 | 3.33 | 3.16 | 2.69 | 2.25 | 2.12 | 2.13 | 2.78 |
| Down | ENSMUSG00000031639  | -1.80 | 1.81E-03 | Tlr3          | protein_coding | 5.83 | 6.09 | 5.40 | 6.03 | 4.56 | 3.73 | 2.86 | 5.10 |
| Down | ENSMUSG00000030249  | -1.42 | 1.81E-03 | Abcc9         | protein_coding | 5.97 | 5.84 | 5.89 | 5.73 | 3.23 | 3.98 | 5.36 | 4.92 |
| Down | ENSMUSG000000060070 | -5.17 | 1.82E-03 | Defa26        | protein_coding | 2.75 | 2.66 | 2.54 | 2.77 | 2.00 | 2.00 | 2.00 | 2.00 |
| Down | ENSMUSG00000015085  | -1.50 | 1.82E-03 | Entpd2        | protein_coding | 4.65 | 4.93 | 4.82 | 4.55 | 2.25 | 3.84 | 3.59 | 4.08 |
| Down | ENSMUSG000000075115 | -5.32 | 1.83E-03 | Olfir1200     | protein_coding | 2.85 | 3.39 | 2.84 | 3.15 | 2.00 | 2.00 | 2.00 | 2.12 |
| Down | ENSMUSG00000001930  | -1.07 | 1.83E-03 | Vwf           | protein_coding | 5.61 | 5.86 | 5.86 | 5.58 | 5.09 | 4.92 | 3.71 | 5.00 |
| Down | ENSMUSG000000078773 | -1.07 | 1.83E-03 | Rad54b        | protein_coding | 4.26 | 4.61 | 4.24 | 3.69 | 4.80 | 3.65 | 3.54 | 3.85 |
| Down | ENSMUSG000000039994 | -2.88 | 1.84E-03 | Timeless      | protein_coding | 2.85 | 2.95 | 3.16 | 2.49 | 2.13 | 2.00 | 2.00 | 2.44 |
| Down | ENSMUSG000000037418 | -1.68 | 1.84E-03 | Best1         | protein_coding | 4.51 | 4.05 | 3.60 | 4.15 | 2.25 | 3.52 | 2.24 | 3.53 |
| Down | ENSMUSG000000078491 | -3.26 | 1.86E-03 | Gm13090       | protein_coding | 2.54 | 2.00 | 3.36 | 3.27 | 2.00 | 2.00 | 2.00 | 2.44 |
| Down | ENSMUSG00000007030  | -2.00 | 1.86E-03 | Vwv7          | protein_coding | 3.18 | 3.73 | 3.84 | 4.02 | 3.04 | 2.24 | 2.24 | 2.92 |
| Down | ENSMUSG000000054966 | -1.80 | 1.86E-03 | Lmnd1         | protein_coding | 3.86 | 4.34 | 4.87 | 5.05 | 2.13 | 3.65 | 2.54 | 4.05 |
| Up   | ENSMUSG000000029177 | 1.28  | 1.89E-03 | Cenpa         | protein_coding | 5.00 | 4.61 | 4.68 | 4.31 | 5.38 | 6.10 | 6.19 | 5.32 |
| Down | ENSMUSG000000036172 | -3.70 | 1.92E-03 | Cd200r3       | protein_coding | 2.75 | 4.20 | 4.17 | 4.63 | 2.00 | 2.24 | 2.70 | 2.70 |
| Down | ENSMUSG000000051452 | -2.87 | 1.92E-03 | Gm11437       | protein_coding | 2.43 | 3.52 | 3.09 | 3.21 | 2.00 | 2.00 | 2.00 | 2.00 |
| Down | ENSMUSG000000090171 | -1.67 | 1.92E-03 | Ugt1a2        | protein_coding | 5.23 | 5.02 | 5.17 | 5.09 | 3.50 | 4.44 | 3.24 | 3.62 |
| Down | ENSMUSG00000029136  | -1.34 | 1.94E-03 | Rbks          | protein_coding | 4.80 | 4.17 | 4.63 | 4.25 | 3.11 | 3.94 | 2.54 | 3.92 |
| Down | ENSMUSG000000078157 | -1.57 | 1.95E-03 | 4931440F15Rik | protein_coding | 4.42 | 3.63 | 3.36 | 3.45 | 2.25 | 3.56 | 2.54 | 2.70 |
| Down | ENSMUSG00000001119  | -1.06 | 1.96E-03 | Col6a1        | protein_coding | 4.87 | 4.84 | 4.91 | 5.12 | 3.85 | 4.22 | 2.86 | 4.75 |
| Down | ENSMUSG000000032257 | -1.74 | 1.98E-03 | Ank1          | protein_coding | 3.81 | 3.68 | 2.74 | 3.01 | 2.85 | 2.63 | 2.00 | 3.01 |
| Down | ENSMUSG00000000682  | -3.18 | 2.00E-03 | Cd52          | protein_coding | 3.81 | 2.95 | 2.84 | 2.37 | 2.00 | 2.00 | 2.00 | 2.00 |
| Down | ENSMUSG000000043430 | -2.86 | 2.00E-03 | Psap1         | protein_coding | 2.54 | 2.86 | 2.64 | 2.69 | 2.00 | 2.00 | 2.00 | 2.44 |
| Down | ENSMUSG000000026938 | -4.02 | 2.01E-03 | Fma3          | protein_coding | 4.02 | 3.19 | 3.60 | 2.30 | 2.12 | 2.12 | 2.00 | 2.12 |
| Down | ENSMUSG000000042371 | -2.53 | 2.02E-03 | Slc5a10       | protein_coding | 3.02 | 3.78 | 3.78 | 3.65 | 3.45 | 2.45 | 2.45 | 2.85 |
| Down | ENSMUSG000000024235 | -1.32 | 2.02E-03 | Map3k8        | protein_coding | 3.91 | 4.95 | 4.65 | 4.09 | 2.97 | 3.77 | 3.62 | 3.62 |
| Down | ENSMUSG000000054134 | -1.87 | 2.03E-03 | Umod1         | protein_coding | 4.07 | 4.72 | 4.17 | 4.45 | 3.11 | 2.34 | 2.93 | 3.70 |
| Down | ENSMUSG000000041052 | -4.16 | 2.05E-03 | Slc7a13       | protein_coding | 3.56 | 3.19 | 3.93 | 3.60 | 2.34 | 2.00 | 2.24 | 2.00 |
| Down | ENSMUSG00000029182  | -2.04 | 2.05E-03 | 1700001C02Rik | protein_coding | 3.38 | 3.33 | 3.54 | 4.34 | 3.23 | 2.44 | 2.00 | 2.62 |
| Down | ENSMUSG000000035860 | -1.49 | 2.05E-03 | Cdhr3         | protein_coding | 4.80 | 4.89 | 5.04 | 4.78 | 4.37 | 4.37 | 3.59 | 3.66 |
| Down | ENSMUSG000000063447 | -2.74 | 2.06E-03 | Ube2d2b       | protein_coding | 2.94 | 2.43 | 3.36 | 2.86 | 2.00 | 2.00 | 2.00 | 2.62 |
| Down | ENSMUSG000000028717 | -1.93 | 2.06E-03 | Tal1          | protein_coding | 4.11 | 3.63 | 4.05 | 4.48 | 2.90 | 3.56 | 2.00 | 2.70 |
| Down | ENSMUSG000000096795 | -1.47 | 2.06E-03 | Zfp433        | protein_coding | 3.77 | 4.20 | 4.20 | 4.45 | 3.64 | 2.85 | 3.30 | 2.78 |
| Up   | ENSMUSG000000034773 | 2.21  | 2.08E-03 | BC030867      | protein_coding | 2.65 | 2.95 | 3.01 | 3.21 | 4.16 | 3.65 | 5.14 | 4.23 |
| Down | ENSMUSG000000089901 | -5.34 | 2.11E-03 | Gm8113        | protein_coding | 3.50 | 3.26 | 2.74 | 2.69 | 2.00 | 2.00 | 2.00 | 2.12 |
| Down | ENSMUSG000000044824 | -2.70 | 2.11E-03 | Olfir545      | protein_coding | 3.25 | 3.83 | 2.54 | 3.33 | 2.00 | 2.12 | 2.45 | 2.54 |
| Down | ENSMUSG000000006012 | -1.24 | 2.14E-03 | 0610040J01Rik | protein_coding | 5.21 | 5.36 | 4.82 | 4.94 | 3.96 | 4.72 | 3.94 | 3.34 |
| Up   | ENSMUSG000000056715 | 1.41  | 2.17E-03 | Ilec1         | protein_coding |      |      |      |      |      |      |      |      |

|      |                    |       |          |               |                |      |      |      |      |      |      |      |      |
|------|--------------------|-------|----------|---------------|----------------|------|------|------|------|------|------|------|------|
| Down | ENSMUSG00000025150 | -4.97 | 2.20E-03 | Cbr2          | protein_coding | 3.72 | 2.86 | 3.54 | 2.77 | 2.00 | 2.00 | 2.00 | 2.24 |
| Down | ENSMUSG00000040732 | -1.84 | 2.20E-03 | Erg           | protein_coding | 3.95 | 3.57 | 4.75 | 3.86 | 2.00 | 3.77 | 2.45 | 2.92 |
| Down | ENSMUSG00000064006 | -3.18 | 2.21E-03 | Olfir190      | protein_coding | 4.03 | 4.17 | 3.82 | 2.13 | 2.00 | 2.00 | 2.62 | 2.62 |
| Down | ENSMUSG00000095961 | -2.56 | 2.21E-03 | Vmn2r102      | protein_coding | 4.72 | 4.95 | 4.89 | 4.96 | 2.57 | 3.87 | 2.13 | 3.06 |
| Down | ENSMUSG00000031891 | -3.09 | 2.22E-03 | Hsd11b2       | protein_coding | 2.30 | 2.55 | 3.49 | 2.69 | 2.00 | 2.34 | 2.00 | 2.69 |
| Down | ENSMUSG00000057596 | -1.80 | 2.22E-03 | Trim30d       | protein_coding | 4.32 | 4.84 | 3.93 | 4.80 | 3.64 | 2.24 | 3.59 | 3.12 |
| Down | ENSMUSG00000059243 | -2.23 | 2.23E-03 | Olfir5        | protein_coding | 4.22 | 4.64 | 4.20 | 4.48 | 2.24 | 2.44 | 3.13 | 3.44 |
| Down | ENSMUSG00000021135 | -1.62 | 2.28E-03 | Slc10a1       | protein_coding | 2.94 | 4.20 | 3.84 | 3.65 | 2.25 | 3.28 | 2.62 | 2.62 |
| Down | ENSMUSG00000042489 | -1.61 | 2.28E-03 | Clspn         | protein_coding | 4.89 | 5.44 | 5.35 | 5.07 | 3.29 | 2.85 | 4.54 | 4.23 |
| Down | ENSMUSG00000025927 | -2.27 | 2.28E-03 | Tfap2b        | protein_coding | 4.39 | 4.34 | 4.80 | 4.78 | 2.74 | 3.47 | 2.00 | 3.44 |
| Down | ENSMUSG00000068758 | -1.85 | 2.28E-03 | Il3ra         | protein_coding | 3.72 | 3.78 | 4.30 | 4.34 | 2.25 | 3.22 | 3.30 | 2.62 |
| Down | ENSMUSG00000043051 | -1.39 | 2.29E-03 | Disc1         | protein_coding | 5.23 | 5.26 | 5.05 | 5.12 | 3.40 | 4.74 | 2.45 | 4.46 |
| Down | ENSMUSG00000024401 | -5.64 | 2.31E-03 | Tnf           | protein_coding | 3.50 | 3.26 | 2.74 | 3.39 | 2.00 | 2.00 | 2.00 | 2.12 |
| Down | ENSMUSG00000021751 | -2.56 | 2.31E-03 | Acox2         | protein_coding | 3.95 | 3.26 | 3.93 | 4.05 | 2.57 | 2.44 | 2.24 | 2.78 |
| Down | ENSMUSG00000024013 | -1.30 | 2.31E-03 | Fgd2          | protein_coding | 5.00 | 5.53 | 4.91 | 5.50 | 4.97 | 3.22 | 4.40 | 3.34 |
| Down | ENSMUSG00000054400 | -1.26 | 2.31E-03 | Klf1          | protein_coding | 4.57 | 5.04 | 4.75 | 4.85 | 3.85 | 3.05 | 3.63 | 4.41 |
| Down | ENSMUSG00000030351 | -2.01 | 2.32E-03 | Tspan11       | protein_coding | 4.22 | 3.33 | 3.36 | 3.60 | 2.13 | 2.12 | 2.71 | 3.23 |
| Down | ENSMUSG00000039899 | -2.10 | 2.34E-03 | Fgl2          | protein_coding | 4.32 | 4.34 | 4.09 | 4.58 | 2.34 | 2.12 | 2.13 | 3.12 |
| Down | ENSMUSG00000021388 | -4.04 | 2.36E-03 | Aspn          | protein_coding | 2.65 | 3.39 | 3.36 | 2.77 | 2.00 | 2.24 | 2.00 | 2.12 |
| Down | ENSMUSG00000057722 | -1.96 | 2.39E-03 | Lep1          | protein_coding | 5.48 | 4.17 | 4.49 | 5.52 | 2.90 | 2.34 | 4.30 | 3.74 |
| Down | ENSMUSG00000022622 | -1.87 | 2.39E-03 | Acr           | protein_coding | 2.75 | 3.78 | 3.30 | 3.90 | 2.00 | 2.00 | 2.86 | 2.92 |
| Down | ENSMUSG00000099611 | -5.23 | 2.40E-03 | Vmn1r189      | protein_coding | 3.25 | 3.39 | 2.64 | 2.69 | 2.00 | 2.00 | 2.00 | 2.12 |
| Down | ENSMUSG00000041736 | -2.31 | 2.41E-03 | Tspo          | protein_coding | 3.25 | 3.63 | 2.84 | 3.15 | 2.37 | 2.00 | 2.00 | 2.85 |
| Down | ENSMUSG00000041565 | -1.54 | 2.41E-03 | L3mbt4        | protein_coding | 4.42 | 4.67 | 4.30 | 3.94 | 3.11 | 3.43 | 2.24 | 3.85 |
| Down | ENSMUSG00000034918 | -1.23 | 2.44E-03 | Cdhr2         | protein_coding | 4.15 | 4.17 | 4.17 | 4.05 | 3.04 | 3.17 | 3.83 | 2.92 |
| Down | ENSMUSG00000090609 | -3.28 | 2.46E-03 | Olfir61       | protein_coding | 3.10 | 2.95 | 3.89 | 2.77 | 2.66 | 2.00 | 2.00 | 2.00 |
| Down | ENSMUSG00000028378 | -2.22 | 2.47E-03 | Ptgr1         | protein_coding | 4.48 | 4.13 | 4.80 | 4.63 | 2.82 | 2.98 | 2.00 | 3.74 |
| Up   | ENSMUSG00000075405 | 1.57  | 2.48E-03 | 9430097D07Rik | protein_coding | 2.85 | 3.11 | 2.64 | 3.27 | 4.31 | 3.80 | 3.35 | 4.25 |
| Down | ENSMUSG00000022061 | -2.01 | 2.48E-03 | Nlx3-1        | protein_coding | 4.39 | 3.46 | 3.80 | 4.09 | 2.37 | 3.22 | 2.13 | 3.12 |
| Down | ENSMUSG00000048373 | -2.49 | 2.50E-03 | Fgfbp1        | protein_coding | 3.61 | 3.39 | 3.43 | 3.69 | 2.00 | 2.53 | 2.45 | 2.62 |
| Down | ENSMUSG00000031394 | -3.25 | 2.51E-03 | Opn1mw        | protein_coding | 3.31 | 3.11 | 3.23 | 3.60 | 2.00 | 2.34 | 2.13 | 2.34 |
| Down | ENSMUSG00000073413 | -1.97 | 2.51E-03 | Ly6g6d        | protein_coding | 4.07 | 4.34 | 3.93 | 3.94 | 3.04 | 3.38 | 2.00 | 2.70 |
| Down | ENSMUSG00000030469 | -2.86 | 2.51E-03 | Trim30b       | protein_coding | 4.32 | 4.17 | 4.70 | 4.55 | 2.82 | 3.53 | 2.00 | 2.53 |
| Down | ENSMUSG00000030742 | -3.50 | 2.53E-03 | Lat           | protein_coding | 3.38 | 3.68 | 3.53 | 3.33 | 2.00 | 2.00 | 2.34 | 2.00 |
| Down | ENSMUSG00000073938 | -2.42 | 2.54E-03 | Olfir632      | protein_coding | 3.38 | 4.01 | 3.16 | 3.33 | 2.47 | 2.24 | 2.45 | 2.54 |
| Down | ENSMUSG00000033223 | -1.64 | 2.54E-03 | Cyp11a1       | protein_coding | 4.80 | 5.14 | 4.43 | 4.55 | 4.81 | 4.55 | 2.35 | 4.41 |
| Down | ENSMUSG00000026638 | -1.13 | 2.55E-03 | Irf6          | protein_coding | 4.18 | 5.06 | 4.54 | 4.67 | 3.50 | 4.10 | 3.19 | 4.08 |
| Up   | ENSMUSG00000042485 | 1.85  | 2.57E-03 | Mustn1        | protein_coding | 3.86 | 3.88 | 3.65 | 3.08 | 5.36 | 3.22 | 5.79 | 5.05 |
| Down | ENSMUSG00000112129 | -3.22 | 2.57E-03 | Pblid1        | protein_coding | 3.81 | 2.76 | 3.23 | 3.74 | 2.47 | 2.00 | 2.00 | 2.44 |
| Down | ENSMUSG00000044176 | -1.05 | 2.57E-03 | Spink10       | protein_coding | 6.33 | 6.69 | 6.23 | 6.36 | 5.04 | 6.12 | 4.54 | 5.56 |
| Down | ENSMUSG0000007591  | -3.62 | 2.58E-03 | Tssk4         | protein_coding | 3.67 | 2.95 | 2.54 | 2.94 | 2.00 | 2.00 | 2.00 | 2.44 |
| Down | ENSMUSG00000052616 | -1.65 | 2.60E-03 | Terb1         | protein_coding | 3.67 | 4.20 | 4.17 | 3.35 | 3.74 | 2.53 | 2.63 | 3.12 |
| Down | ENSMUSG00000042554 | -2.55 | 2.62E-03 | Zp3r          | protein_coding | 3.56 | 4.58 | 3.93 | 4.02 | 2.13 | 2.00 | 2.71 | 3.29 |
| Down | ENSMUSG00000026398 | -3.12 | 2.64E-03 | Nr5a2         | protein_coding | 3.72 | 3.63 | 3.54 | 3.78 | 2.00 | 2.45 | 2.00 | 2.45 |
| Down | ENSMUSG00000049565 | -2.69 | 2.65E-03 | Aknad1        | protein_coding | 4.07 | 4.20 | 4.13 | 4.65 | 2.97 | 2.00 | 2.79 | 2.78 |
| Down | ENSMUSG00000051367 | -2.35 | 2.65E-03 | Six1          | protein_coding | 3.38 | 4.01 | 3.89 | 3.78 | 2.57 | 2.98 | 2.00 | 2.54 |
| Down | ENSMUSG00000090698 | -1.22 | 2.66E-03 | Apo1e1        | protein_coding | 4.05 | 4.29 | 4.05 | 4.37 | 2.47 | 3.69 | 3.99 | 3.99 |
| Down | ENSMUSG00000092174 | -5.50 | 2.67E-03 | Myrmk         | protein_coding | 2.16 | 2.86 | 3.09 | 3.15 | 2.00 | 2.00 | 2.00 | 2.00 |
| Down | ENSMUSG00000041644 | -1.80 | 2.67E-03 | Slc5a12       | protein_coding | 3.50 | 3.97 | 4.65 | 4.65 | 3.50 | 2.70 | 2.00 | 3.44 |
| Down | ENSMUSG00000025610 | -4.74 | 2.68E-03 | Map3k7cd      | protein_coding | 2.94 | 2.43 | 2.74 | 3.01 | 2.00 | 2.00 | 2.00 | 2.12 |
| Down | ENSMUSG00000030340 | -1.84 | 2.68E-03 | Scnn1a        | protein_coding | 6.05 | 5.96 | 6.09 | 5.64 | 4.10 | 4.24 | 2.79 | 5.23 |
| Down | ENSMUSG00000028172 | -2.97 | 2.69E-03 | Tacr3         | protein_coding | 4.22 | 5.56 | 4.78 | 4.74 | 2.00 | 2.98 | 2.00 | 3.74 |
| Down | ENSMUSG00000091415 | -1.16 | 2.69E-03 | Ak9           | protein_coding | 4.51 | 5.10 | 4.73 | 5.11 | 3.64 | 4.44 | 3.71 | 5.11 |
| Down | ENSMUSG00000021414 | -2.58 | 2.70E-03 | Fam217a       | protein_coding | 3.67 | 4.20 | 3.97 | 5.25 | 3.50 | 2.85 | 2.00 | 2.34 |
| Down | ENSMUSG00000021685 | -2.92 | 2.72E-03 | Otp           | protein_coding | 3.31 | 3.46 | 3.84 | 3.50 | 2.47 | 2.53 | 2.00 | 2.24 |
| Down | ENSMUSG00000027474 | -2.73 | 2.72E-03 | Ccm2l         | protein_coding | 3.18 | 4.17 | 3.23 | 3.45 | 2.00 | 2.00 | 2.00 | 3.12 |
| Down | ENSMUSG00000039851 | -1.84 | 2.72E-03 | 4932438H23Rik | protein_coding | 4.07 | 4.05 | 3.93 | 4.03 | 2.37 | 2.24 | 3.07 | 3.78 |
| Down | ENSMUSG00000043102 | -3.29 | 2.73E-03 | Qrfp          | protein_coding | 2.85 | 3.63 | 2.29 | 3.21 | 2.00 | 2.00 | 2.00 | 2.54 |
| Down | ENSMUSG00000048772 | -1.59 | 2.73E-03 | P115          | protein_coding | 4.48 | 4.86 | 4.27 | 4.91 | 3.23 | 2.70 | 3.90 | 3.74 |
| Down | ENSMUSG00000007827 | -4.46 | 2.74E-03 | Ankrk26       | protein_coding | 2.43 | 3.46 | 3.09 | 2.86 | 2.00 | 2.00 | 2.24 | 2.24 |
| Down | ENSMUSG00000101860 | -2.37 | 2.74E-03 | Mindy4b-ps    | protein_coding | 4.51 | 4.34 | 3.49 | 4.31 | 2.00 | 2.53 | 2.45 | 3.57 |
| Down | ENSMUSG00000118895 | -1.66 | 2.74E-03 | Gm3435        | protein_coding | 3.91 | 3.11 | 3.84 | 4.19 | 2.25 | 2.34 | 3.45 | 2.99 |
| Down | ENSMUSG00000047502 | -1.15 | 2.75E-03 | Mroh7         | protein_coding | 5.12 | 4.77 | 4.17 | 4.42 | 3.85 | 3.56 | 3.30 | 4.20 |
| Down | ENSMUSG00000056531 | -1.28 | 2.78E-03 | Ccdc18        | protein_coding | 5.24 | 4.95 | 5.13 | 5.58 | 4.31 | 4.60 | 2.86 | 4.36 |
| Down | ENSMUSG00000094950 | -2.29 | 2.79E-03 | Vmn2r66       | protein_coding | 3.95 | 4.74 | 4.91 | 4.74 | 2.13 | 3.47 | 2.86 | 3.34 |
| Down | ENSMUSG00000031786 | -2.11 | 2.83E-03 | Drc7          | protein_coding | 5.94 | 4.69 | 4.68 | 6.67 | 4.76 | 2.98 | 2.54 | 4.41 |
| Down | ENSMUSG00000031966 | -2.33 | 2.84E-03 | Gilb1i3       | protein_coding | 4.59 | 4.09 | 3.84 | 4.12 | 2.25 | 2.70 | 3.40 | 2.44 |
| Down | ENSMUSG00000089844 | -1.39 | 2.84E-03 | A530032D15Rik | protein_coding | 4.11 | 3.88 | 4.20 | 4.25 | 2.82 | 3.05 | 3.30 | 3.48 |
| Down | ENSMUSG00000022210 | -1.06 | 2.85E-03 | Dhrs4         | protein_coding | 5.80 | 6.11 | 5.53 | 5.69 | 5.15 | 5.47 | 3.54 | 4.55 |
| Down | ENSMUSG00000054191 | -4.57 | 2.87E-03 | Kif1          | protein_coding | 2.30 | 2.76 | 2.93 | 2.86 | 2.00 | 2.00 | 2.00 | 2.12 |
| Down | ENSMUSG00000026177 | -1.50 | 2.87E-03 | Slc11a1       | protein_coding | 4.07 | 3.53 | 3.70 | 4.37 | 3.81 | 2.70 | 3.07 | 2.92 |
| Up   | ENSMUSG00000048772 | 1.68  | 2.88E-03 | Tmem53        | protein_coding | 3.99 | 4.68 | 3.23 | 3.78 | 4.82 | 4.99 | 5.17 | 5.11 |
| Down | ENSMUSG00000031983 | -3.98 | 2.89E-03 | Olfir57       | protein_coding | 2.65 | 3.26 | 2.93 | 3.27 | 2.00 | 2.12 | 2.00 | 2.24 |
| Down | ENSMUSG00000095677 | -2.21 | 2.89E-03 | Dynhl1        | protein_coding | 3.25 | 3.26 | 2.95 | 3.36 | 2.37 | 3.15 | 2.35 | 2.34 |
| Down | ENSMUSG00000044811 | -1.97 | 2.88E-03 | Cd300c2       | protein_coding | 4.57 | 4.46 | 4.46 | 4.22 | 3.80 | 3.24 | 2.54 | 3.24 |
| Down | ENSMUSG00000031160 | -4.79 | 2.89E-03 | Eras          | protein_coding | 2.30 | 2.55 | 2.54 | 2.77 | 2.00 | 2.00 | 2.00 | 2.00 |
| Down | ENSMUSG00000021322 | -2.27 | 2.90E-03 | Acah          | protein_coding | 4.07 | 4.09 | 4.05 | 4.53 | 3.50 | 2.92 | 2.00 | 2.34 |
| Down | ENSMUSG00000072584 | -3.81 | 2.91E-03 | Gm7489        | protein_coding | 2.94 | 2.43 | 2.93 | 2.49 | 2.13 | 2.00 | 2.00 | 2.12 |
| Down | ENSMUSG00000043953 | -3.97 | 2.92E-03 | Ccr12         | protein_coding | 2.65 | 3.57 | 3.80 | 3.60 | 2.00 | 2.34 | 2.00 | 2.24 |
| Down | ENSMUSG00000046031 | -5.66 | 2.93E-03 | Calhm6        | protein_coding | 2.43 | 2.76 | 3.23 | 3.01 | 2.00 | 2.00 | 2.00 | 2.00 |
| Down | ENSMUSG00000060572 | -1.38 | 2.94E-03 | Mfap2         | protein_coding | 3.31 | 4.01 | 4.24 | 3.69 | 2.85 | 3.35 | 2.92 | 2.92 |
| Down | ENSMUSG00000054702 | -1.23 | 2.94E-03 | Ap1s3         | protein_coding | 4.91 | 4.50 | 3.97 | 4.70 | 2.90 | 3.52 | 3.40 | 4.31 |
| Down | ENSMUSG00000032083 | -3.88 | 2.96E-03 | Apoa1         | protein_coding | 3.61 | 2.00 | 3.23 | 3.60 | 2.00 | 2.00 | 2.00 | 2.24 |
| Down | ENSMUSG00000035472 | -2.07 | 3.00E-03 | Slc25a21      | protein_coding | 4.82 | 4.64 | 3.93 | 4.43 | 2.78 | 2.78 | 2.93 | 3.66 |
| Down | ENSMUSG00000039783 | -1.55 | 3.01E-03 | Kmo           | protein_coding | 3.77 | 4.09 | 4.27 | 4.58 | 3.24 | 2.85 | 3.00 | 3.48 |
| Down | ENSMUSG00000094396 | -2.31 | 3.02E-03 | Vmn2r124      | protein_coding | 4.18 | 4.93 | 4.17 | 4.42 | 2.25 | 2.85 | 3.00 | 3.39 |
| Down | ENSMUSG00000036687 | -1.55 | 3.02E-03 | Tmem184a      | protein_coding | 4.18 | 3.57 | 5.30 | 4.37 | 2.66 | 3.22 | 3.63 | 3.23 |
| Up   | ENSMUSG00000043    |       |          |               |                |      |      |      |      |      |      |      |      |



|      |                     |       |          |               |                |      |      |      |      |      |      |      |      |
|------|---------------------|-------|----------|---------------|----------------|------|------|------|------|------|------|------|------|
| Up   | ENSMUSG00000042631  | 1.16  | 4.08E-03 | Xkr7          | protein_coding | 3.50 | 4.13 | 3.09 | 3.69 | 3.92 | 4.70 | 4.57 | 4.77 |
| Down | ENSMUSG00000090019  | -1.75 | 4.11E-03 | Gimap1        | protein_coding | 3.72 | 3.83 | 3.60 | 3.74 | 2.82 | 3.28 | 2.35 | 2.34 |
| Down | ENSMUSG00000071068  | -1.70 | 4.11E-03 | Trem1         | protein_coding | 3.91 | 4.05 | 4.34 | 4.37 | 2.47 | 3.47 | 2.86 | 3.23 |
| Down | ENSMUSG00000078302  | -1.64 | 4.11E-03 | Foxd1         | protein_coding | 3.25 | 3.92 | 3.70 | 4.19 | 3.17 | 2.92 | 2.00 | 3.06 |
| Down | ENSMUSG00000031927  | -2.61 | 4.12E-03 | 1700012B09Rik | protein_coding | 3.25 | 3.83 | 3.80 | 3.60 | 3.74 | 2.12 | 2.00 | 2.70 |
| Down | ENSMUSG00000040752  | -1.17 | 4.12E-03 | Myh6          | protein_coding | 4.29 | 4.27 | 4.30 | 4.72 | 3.40 | 3.43 | 3.19 | 4.02 |
| Up   | ENSMUSG00000025205  | 1.03  | 4.15E-03 | Oprk1         | protein_coding | 4.29 | 4.13 | 4.45 | 4.34 | 4.31 | 4.46 | 5.34 | 4.72 |
| Down | ENSMUSG00000063060  | -1.53 | 4.15E-03 | Sox7          | protein_coding | 4.22 | 4.27 | 3.89 | 4.31 | 2.25 | 3.47 | 3.71 | 2.70 |
| Down | ENSMUSG00000025787  | -1.18 | 4.17E-03 | Tgm4          | protein_coding | 4.93 | 4.50 | 4.68 | 4.80 | 4.22 | 3.98 | 3.00 | 3.78 |
| Down | ENSMUSG00000032591  | -3.15 | 4.21E-03 | Mst1          | protein_coding | 2.75 | 2.86 | 2.37 | 2.64 | 2.49 | 2.00 | 2.00 | 2.00 |
| Down | ENSMUSG00000040562  | -1.82 | 4.21E-03 | Gstm2         | protein_coding | 2.75 | 3.73 | 4.27 | 3.82 | 2.57 | 2.00 | 3.00 | 3.12 |
| Down | ENSMUSG00000096553  | -1.81 | 4.21E-03 | Gm10097       | protein_coding | 2.85 | 2.76 | 4.09 | 3.90 | 2.00 | 2.00 | 2.93 | 2.70 |
| Down | ENSMUSG00000059060  | -2.19 | 4.26E-03 | Rad51b        | protein_coding | 3.44 | 4.44 | 3.75 | 4.12 | 3.11 | 2.12 | 2.35 | 3.06 |
| Down | ENSMUSG00000030247  | -2.12 | 4.27E-03 | Kcnj8         | protein_coding | 2.94 | 4.82 | 4.09 | 3.98 | 3.17 | 2.70 | 2.00 | 3.12 |
| Down | ENSMUSG00000028963  | -4.59 | 4.31E-03 | Uts2          | protein_coding | 2.30 | 3.39 | 2.00 | 2.86 | 2.00 | 2.12 | 2.00 | 2.00 |
| Down | ENSMUSG00000047014  | -2.29 | 4.31E-03 | Catsperb      | protein_coding | 3.02 | 4.93 | 4.05 | 4.45 | 2.97 | 2.62 | 2.79 | 2.92 |
| Down | ENSMUSG00000062593  | -3.41 | 4.32E-03 | Gm49339       | protein_coding | 3.02 | 2.95 | 2.74 | 3.15 | 2.00 | 2.12 | 2.13 | 2.24 |
| Down | ENSMUSG00000028885  | -1.95 | 4.32E-03 | Smpd3b        | protein_coding | 2.94 | 3.52 | 3.97 | 4.02 | 2.25 | 2.85 | 2.35 | 2.99 |
| Down | ENSMUSG00000007034  | -3.20 | 4.35E-03 | Slc44a4       | protein_coding | 2.54 | 3.26 | 3.01 | 3.98 | 2.00 | 2.00 | 2.00 | 2.70 |
| Down | ENSMUSG00000035486  | -1.48 | 4.35E-03 | Pik5          | protein_coding | 5.19 | 4.77 | 5.24 | 5.30 | 2.37 | 2.92 | 4.45 | 4.70 |
| Down | ENSMUSG00000040489  | -2.98 | 4.37E-03 | Sox30         | protein_coding | 3.99 | 2.86 | 4.37 | 3.33 | 2.74 | 2.53 | 2.00 | 2.12 |
| Down | ENSMUSG00000100586  | -2.77 | 4.40E-03 | Vmn1f90       | protein_coding | 2.85 | 3.26 | 3.97 | 3.78 | 2.66 | 2.53 | 2.13 | 2.00 |
| Down | ENSMUSG00000076433  | -1.87 | 4.41E-03 | Cep295nl      | protein_coding | 2.43 | 3.03 | 4.17 | 3.94 | 2.90 | 2.24 | 2.54 | 2.00 |
| Down | ENSMUSG00000113061  | -1.87 | 4.42E-03 | Gm11361       | protein_coding | 2.65 | 2.43 | 3.49 | 2.69 | 2.00 | 2.34 | 2.24 | 2.54 |
| Down | ENSMUSG00000033187  | -2.40 | 4.43E-03 | BC016579      | protein_coding | 3.95 | 3.26 | 4.09 | 4.02 | 2.66 | 2.85 | 2.00 | 2.70 |
| Down | ENSMUSG00000033794  | -2.37 | 4.43E-03 | Lpcat2b       | protein_coding | 2.75 | 3.03 | 3.16 | 3.45 | 2.00 | 2.00 | 2.79 | 2.24 |
| Down | ENSMUSG00000029298  | -1.85 | 4.43E-03 | Gbp9          | protein_coding | 4.03 | 4.53 | 4.52 | 4.92 | 2.37 | 3.77 | 2.71 | 3.57 |
| Down | ENSMUSG00000044338  | -3.07 | 4.44E-03 | Aplnr         | protein_coding | 3.38 | 3.97 | 3.36 | 2.94 | 2.47 | 2.00 | 2.35 | 2.24 |
| Down | ENSMUSG00000079698  | -2.98 | 4.46E-03 | Vmn2r93       | protein_coding | 4.48 | 4.34 | 3.80 | 4.48 | 2.25 | 2.24 | 2.00 | 3.39 |
| Down | ENSMUSG00000012705  | -2.65 | 4.46E-03 | Retn          | protein_coding | 3.38 | 2.30 | 2.74 | 2.94 | 2.00 | 2.24 | 2.24 | 2.34 |
| Down | ENSMUSG00000024521  | -1.54 | 4.50E-03 | Pmaip1        | protein_coding | 3.25 | 4.86 | 4.43 | 4.19 | 3.69 | 2.74 | 2.93 | 3.24 |
| Down | ENSMUSG00000040139  | -1.07 | 4.51E-03 | 943003801Rik  | protein_coding | 4.62 | 4.91 | 4.95 | 5.28 | 3.85 | 4.30 | 4.35 | 3.74 |
| Down | ENSMUSG00000022461  | -2.91 | 4.52E-03 | Pik5          | protein_coding | 2.54 | 3.19 | 2.54 | 2.86 | 2.00 | 2.00 | 2.00 | 2.70 |
| Down | ENSMUSG00000010176  | -2.97 | 4.52E-03 | Vmn2r115      | protein_coding | 3.91 | 4.50 | 4.54 | 4.62 | 2.13 | 2.00 | 3.34 | 2.00 |
| Down | ENSMUSG00000055010  | -2.51 | 4.53E-03 | A830031A19Rik | protein_coding | 3.31 | 3.52 | 2.74 | 3.39 | 2.00 | 2.92 | 2.00 | 2.12 |
| Down | ENSMUSG00000056257  | -3.45 | 4.58E-03 | Gm5447        | protein_coding | 3.91 | 3.33 | 2.84 | 3.55 | 2.00 | 2.00 | 2.35 | 2.44 |
| Down | ENSMUSG00000020928  | -2.69 | 4.61E-03 | Hgd1b         | protein_coding | 4.07 | 3.57 | 3.36 | 3.27 | 2.00 | 2.34 | 2.13 | 2.92 |
| Down | ENSMUSG00000056144  | -2.58 | 4.61E-03 | Trim34a       | protein_coding | 3.77 | 4.44 | 3.97 | 4.55 | 2.13 | 2.00 | 3.07 | 3.17 |
| Down | ENSMUSG00000019893  | -1.62 | 4.62E-03 | Ros1          | protein_coding | 3.91 | 4.67 | 4.95 | 5.24 | 3.11 | 3.65 | 3.54 | 3.74 |
| Down | ENSMUSG00000011305  | -2.27 | 4.65E-03 | Plin5         | protein_coding | 3.25 | 3.46 | 3.16 | 2.94 | 2.00 | 2.44 | 2.00 | 2.78 |
| Down | ENSMUSG00000019734  | -1.23 | 4.67E-03 | Tmc4          | protein_coding | 4.48 | 4.53 | 4.73 | 4.02 | 4.31 | 2.85 | 2.93 | 3.62 |
| Down | ENSMUSG00000078598  | -3.94 | 4.74E-03 | Skint5        | protein_coding | 3.67 | 3.83 | 3.80 | 4.34 | 2.37 | 2.44 | 2.00 | 2.12 |
| Down | ENSMUSG00000032322  | -1.09 | 4.76E-03 | Pstpip1       | protein_coding | 3.81 | 4.47 | 4.40 | 4.09 | 2.66 | 3.28 | 3.97 | 3.53 |
| Down | ENSMUSG00000047230  | -2.80 | 4.77E-03 | Cldn2         | protein_coding | 4.22 | 3.03 | 3.60 | 5.94 | 2.90 | 2.00 | 2.71 | 3.34 |
| Down | ENSMUSG00000017723  | -2.67 | 4.77E-03 | Wfdc2         | protein_coding | 2.85 | 2.55 | 3.16 | 3.86 | 2.00 | 2.70 | 2.00 | 2.24 |
| Down | ENSMUSG00000034837  | -1.97 | 4.78E-03 | Gnat1         | protein_coding | 3.50 | 3.46 | 3.43 | 3.50 | 2.66 | 2.44 | 2.00 | 2.92 |
| Down | ENSMUSG00000022363  | -3.94 | 4.80E-03 | Tlec          | protein_coding | 4.51 | 3.92 | 3.70 | 3.92 | 2.00 | 2.12 | 2.00 | 2.82 |
| Down | ENSMUSG00000028307  | -1.85 | 4.84E-03 | Aldob         | protein_coding | 3.91 | 3.83 | 4.40 | 4.74 | 2.00 | 2.98 | 3.19 | 3.57 |
| Up   | ENSMUSG000000553475 | 1.14  | 4.85E-03 | Tnfrap8       | protein_coding | 5.26 | 5.52 | 5.22 | 5.24 | 7.35 | 5.02 | 5.84 | 6.31 |
| Down | ENSMUSG00000026070  | -3.00 | 4.86E-03 | Il18r1        | protein_coding | 3.56 | 3.46 | 4.24 | 3.98 | 2.74 | 2.12 | 2.00 | 2.62 |
| Down | ENSMUSG00000054383  | -1.06 | 4.94E-03 | Pnma1         | protein_coding | 4.03 | 4.95 | 4.63 | 4.74 | 3.73 | 4.16 | 3.45 | 3.78 |
| Down | ENSMUSG00000032436  | -2.13 | 4.95E-03 | Cmtm7         | protein_coding | 3.91 | 4.53 | 4.09 | 4.02 | 2.00 | 3.11 | 2.00 | 3.57 |
| Up   | ENSMUSG00000028865  | 1.08  | 5.00E-03 | Cd1642        | protein_coding | 4.59 | 4.20 | 4.07 | 3.60 | 5.42 | 4.49 | 4.79 | 4.98 |
| Down | ENSMUSG00000095562  | -5.12 | 5.11E-03 | Gm21887       | protein_coding | 2.75 | 2.55 | 2.84 | 2.49 | 2.00 | 2.00 | 2.00 | 2.00 |
| Down | ENSMUSG00000074676  | -4.91 | 5.11E-03 | Foxs1         | protein_coding | 2.65 | 2.55 | 2.84 | 2.27 | 2.00 | 2.00 | 2.00 | 2.00 |
| Down | ENSMUSG00000030708  | -1.71 | 5.11E-03 | Dnajb13       | protein_coding | 3.81 | 4.50 | 3.60 | 4.22 | 3.11 | 2.70 | 2.54 | 3.44 |
| Down | ENSMUSG00000030484  | -1.62 | 5.15E-03 | Cyp4f18       | protein_coding | 3.72 | 4.22 | 3.80 | 4.22 | 3.20 | 2.72 | 2.71 | 2.99 |
| Down | ENSMUSG00000015355  | -3.10 | 5.16E-03 | Cd48          | protein_coding | 3.44 | 3.03 | 3.01 | 3.00 | 2.00 | 2.62 | 2.00 | 2.12 |
| Down | ENSMUSG00000053783  | -1.66 | 5.18E-03 | 1700016K19Rik | protein_coding | 3.67 | 4.50 | 4.24 | 4.98 | 3.77 | 3.77 | 2.63 | 2.24 |
| Down | ENSMUSG00000079560  | -3.83 | 5.21E-03 | Hoxa3         | protein_coding | 3.67 | 3.33 | 3.97 | 3.78 | 2.12 | 2.13 | 2.00 | 2.54 |
| Down | ENSMUSG00000032454  | -2.54 | 5.21E-03 | Tdgf1         | protein_coding | 4.39 | 3.68 | 3.43 | 3.60 | 2.00 | 2.70 | 2.24 | 2.92 |
| Down | ENSMUSG00000049241  | -2.28 | 5.21E-03 | Hcar1         | protein_coding | 3.18 | 3.97 | 3.65 | 3.39 | 2.00 | 2.44 | 2.86 | 2.54 |
| Down | ENSMUSG00000024575  | -1.21 | 5.22E-03 | Pde6a         | protein_coding | 4.26 | 4.69 | 4.30 | 4.50 | 2.57 | 3.38 | 4.19 | 3.62 |
| Down | ENSMUSG00000066071  | -5.30 | 5.23E-03 | Cyp4a12a      | protein_coding | 3.10 | 3.39 | 3.43 | 3.90 | 2.00 | 2.00 | 2.00 | 2.24 |
| Down | ENSMUSG00000073043  | -4.68 | 5.25E-03 | Atoh1         | protein_coding | 3.61 | 3.33 | 3.49 | 3.39 | 2.00 | 2.00 | 2.00 | 2.34 |
| Down | ENSMUSG00000050865  | -3.21 | 5.25E-03 | Olfir1494     | protein_coding | 3.61 | 3.33 | 3.89 | 3.65 | 2.00 | 2.24 | 2.35 | 2.54 |
| Down | ENSMUSG00000040046  | -2.11 | 5.27E-03 | Tph1          | protein_coding | 4.15 | 4.17 | 4.13 | 4.09 | 3.23 | 2.24 | 2.00 | 3.39 |
| Down | ENSMUSG00000006204  | -1.62 | 5.30E-03 | 5430419D17Rik | protein_coding | 4.54 | 5.31 | 5.67 | 5.48 | 3.89 | 4.24 | 3.19 | 4.28 |
| Down | ENSMUSG00000090121  | -3.80 | 5.33E-03 | Abhd12b       | protein_coding | 3.61 | 3.11 | 3.30 | 3.45 | 2.25 | 2.00 | 2.00 | 2.34 |
| Down | ENSMUSG00000043036  | -2.36 | 5.33E-03 | Ccdc63        | protein_coding | 3.86 | 3.46 | 4.46 | 4.78 | 2.98 | 3.78 | 2.35 | 3.79 |
| Down | ENSMUSG00000016496  | -1.48 | 5.38E-03 | Cd274         | protein_coding | 4.98 | 4.67 | 4.20 | 4.85 | 4.34 | 2.70 | 3.30 | 3.48 |
| Down | ENSMUSG00000100512  | -4.16 | 5.39E-03 | Ovo3          | protein_coding | 2.43 | 2.86 | 2.29 | 2.69 | 2.00 | 2.00 | 2.00 | 2.12 |
| Down | ENSMUSG00000029547  | -1.86 | 5.42E-03 | Ilgse4        | protein_coding | 4.48 | 4.41 | 3.93 | 3.93 | 2.13 | 3.70 | 3.94 | 3.70 |
| Down | ENSMUSG00000027702  | -2.76 | 5.45E-03 | Lrrc34        | protein_coding | 3.31 | 3.39 | 3.23 | 3.69 | 2.00 | 2.00 | 2.00 | 2.12 |
| Down | ENSMUSG00000027995  | -2.61 | 5.46E-03 | Tlr2          | protein_coding | 4.26 | 3.57 | 4.09 | 3.08 | 2.90 | 2.70 | 2.00 | 2.24 |
| Down | ENSMUSG00000095576  | -2.60 | 5.47E-03 | Fmo6          | protein_coding | 4.07 | 3.57 | 3.75 | 3.50 | 2.37 | 2.78 | 2.00 | 2.62 |
| Down | ENSMUSG00000022871  | -3.38 | 5.48E-03 | Fetub         | protein_coding | 2.75 | 3.11 | 3.23 | 3.33 | 2.00 | 2.24 | 2.24 | 2.24 |
| Down | ENSMUSG00000028544  | -3.04 | 5.48E-03 | Slc5a9        | protein_coding | 4.18 | 4.31 | 4.30 | 4.60 | 2.66 | 2.34 | 2.00 | 3.12 |
| Down | ENSMUSG00000024696  | -1.90 | 5.48E-03 | Lpxn          | protein_coding | 3.81 | 4.05 | 3.84 | 4.12 | 2.82 | 3.28 | 2.45 | 2.62 |
| Down | ENSMUSG00000004231  | -1.83 | 5.49E-03 | Pax2          | protein_coding | 4.03 | 3.92 | 3.89 | 4.19 | 3.04 | 2.24 | 3.19 | 2.92 |
| Down | ENSMUSG00000035528  | -2.85 | 5.51E-03 | Npffr2        | protein_coding | 2.94 | 3.33 | 3.23 | 2.86 | 2.00 | 2.12 | 2.35 | 2.34 |
| Down | ENSMUSG00000025747  | -1.15 | 5.53E-03 | Tyms          | protein_coding | 4.48 | 5.08 | 4.85 | 5.05 | 3.73 | 4.22 | 3.19 | 4.38 |
| Down | ENSMUSG00000039376  | -1.33 | 5.54E-03 | Synpo2l       | protein_coding | 4.91 | 4.44 | 4.72 | 4.72 | 3.55 | 2.98 | 4.07 | 3.89 |
| Down | ENSMUSG00000100838  | -1.41 | 5.58E-03 | Gm29094       | protein_coding | 4.89 | 4.53 | 4.54 | 4.55 | 3.89 | 2.62 | 3.79 | 3.66 |
| Down | ENSMUSG00000022759  | -1.31 | 5.58E-03 | Lrrc74b       | protein_coding | 4.45 | 4.79 | 3.60 | 4.53 | 2.82 | 3.61 | 3.59 | 3.62 |
| Down | ENSMUSG00000002578  | -2.83 | 5.59E-03 | Ikzf4         | protein_coding | 2.30 | 3.19 | 3.09 | 2.69 | 2.00 | 2.12 | 2.24 | 2.24 |
| Down | ENSMUSG00000021636  | -1.76 | 5.59E-03 | Marveld2      | protein_coding | 3.38 | 3.88 | 3.89 | 3.88 | 2.00 | 3.22 | 2.94 | 2.92 |

|      |                    |       |          |               |                |      |      |      |      |      |      |      |      |
|------|--------------------|-------|----------|---------------|----------------|------|------|------|------|------|------|------|------|
| Down | ENSMUSG00000042918 | -1.24 | 5.63E-03 | Mamstr        | protein_coding | 4.26 | 4.86 | 4.27 | 4.87 | 3.60 | 3.84 | 2.71 | 4.11 |
| Down | ENSMUSG00000093839 | -3.67 | 5.69E-03 | Olfr462       | protein_coding | 4.26 | 4.17 | 3.84 | 3.39 | 2.00 | 2.34 | 2.00 | 2.70 |
| Down | ENSMUSG00000050994 | -1.55 | 5.69E-03 | Adgb          | protein_coding | 4.22 | 5.64 | 5.19 | 5.30 | 4.62 | 4.62 | 2.00 | 4.20 |
| Down | ENSMUSG00000039457 | -1.09 | 5.70E-03 | Ppl           | protein_coding | 5.26 | 5.19 | 6.04 | 5.94 | 4.22 | 4.72 | 4.92 | 4.61 |
| Down | ENSMUSG00000042961 | -1.49 | 5.74E-03 | Egflam        | protein_coding | 4.77 | 4.77 | 4.89 | 4.89 | 4.22 | 4.72 | 2.45 | 4.81 |
| Down | ENSMUSG00000029695 | -1.27 | 5.74E-03 | Aass          | protein_coding | 4.72 | 4.79 | 4.24 | 4.96 | 3.64 | 3.87 | 2.71 | 4.23 |
| Down | ENSMUSG00000015173 | -1.20 | 5.75E-03 | Rnls          | protein_coding | 4.75 | 4.75 | 4.93 | 4.93 | 2.24 | 2.47 | 3.75 | 4.41 |
| Up   | ENSMUSG00000110358 | 1.49  | 5.80E-03 | A730009.09Rik | protein_coding | 3.38 | 3.19 | 3.49 | 3.94 | 4.80 | 4.85 | 4.27 | 4.61 |
| Down | ENSMUSG00000058513 | -3.31 | 5.81E-03 | Olfr801       | protein_coding | 2.75 | 4.24 | 3.89 | 4.02 | 2.74 | 2.12 | 2.00 | 2.34 |
| Down | ENSMUSG00000026602 | -2.71 | 5.82E-03 | Nphs2         | protein_coding | 3.99 | 3.73 | 3.43 | 3.90 | 2.92 | 2.12 | 2.00 | 2.62 |
| Down | ENSMUSG00000092335 | -1.81 | 5.82E-03 | Zfp977        | protein_coding | 3.10 | 3.68 | 4.05 | 3.69 | 3.04 | 2.00 | 2.54 | 2.99 |
| Down | ENSMUSG00000048126 | -1.08 | 5.88E-03 | Col6a3        | protein_coding | 5.51 | 5.55 | 5.50 | 5.95 | 4.10 | 4.58 | 4.10 | 5.49 |
| Down | ENSMUSG00000078599 | -2.47 | 5.90E-03 | Skint8        | protein_coding | 3.81 | 4.09 | 2.84 | 3.82 | 2.57 | 2.62 | 2.24 | 2.54 |
| Down | ENSMUSG00000054836 | -1.06 | 5.90E-03 | Elp6          | protein_coding | 6.03 | 6.26 | 6.31 | 6.51 | 4.80 | 5.77 | 5.13 | 5.36 |
| Down | ENSMUSG00000046650 | -2.57 | 5.91E-03 | Olfr1440      | protein_coding | 3.77 | 3.83 | 3.93 | 4.15 | 2.13 | 2.78 | 2.13 | 2.99 |
| Down | ENSMUSG00000079546 | -2.19 | 5.91E-03 | Gm11146       | protein_coding | 2.43 | 3.78 | 2.29 | 3.15 | 2.00 | 2.78 | 2.00 | 2.35 |
| Down | ENSMUSG00000030510 | -2.40 | 5.92E-03 | Cers3         | protein_coding | 3.50 | 3.92 | 3.43 | 4.50 | 2.13 | 2.78 | 2.24 | 3.06 |
| Down | ENSMUSG00000046916 | -4.51 | 6.00E-03 | Myct1         | protein_coding | 2.30 | 3.68 | 3.01 | 2.77 | 2.00 | 2.12 | 2.00 | 2.00 |
| Down | ENSMUSG00000022149 | -4.64 | 6.01E-03 | C9            | protein_coding | 3.67 | 3.52 | 3.23 | 3.27 | 2.00 | 2.00 | 2.00 | 2.34 |
| Down | ENSMUSG00000038379 | -2.20 | 6.01E-03 | Ttk           | protein_coding | 4.42 | 4.01 | 4.09 | 3.94 | 2.86 | 2.24 | 3.07 | 3.06 |
| Down | ENSMUSG00000066000 | -4.04 | 6.04E-03 | Zfp979        | protein_coding | 2.54 | 3.03 | 3.09 | 3.50 | 2.00 | 2.00 | 2.00 | 2.00 |
| Down | ENSMUSG00000034917 | -1.78 | 6.04E-03 | Tjp3          | protein_coding | 4.32 | 4.01 | 3.36 | 4.74 | 2.47 | 2.44 | 2.71 | 3.92 |
| Down | ENSMUSG00000026875 | -2.21 | 6.05E-03 | Traf1         | protein_coding | 4.51 | 4.27 | 3.84 | 4.28 | 2.00 | 3.22 | 2.86 | 3.06 |
| Down | ENSMUSG00000027861 | -2.01 | 6.06E-03 | Casq2         | protein_coding | 3.67 | 4.20 | 3.49 | 3.78 | 2.90 | 2.24 | 2.54 | 2.99 |
| Down | ENSMUSG00000050270 | -1.83 | 6.06E-03 | Tmem220       | protein_coding | 4.32 | 4.34 | 4.43 | 3.98 | 2.13 | 3.17 | 2.93 | 3.62 |
| Down | ENSMUSG00000072572 | -1.72 | 6.07E-03 | Slc39a2       | protein_coding | 4.18 | 4.27 | 4.24 | 4.19 | 2.47 | 3.38 | 2.00 | 3.78 |
| Down | ENSMUSG00000037627 | -2.04 | 6.08E-03 | Rgs22         | protein_coding | 4.98 | 5.43 | 5.37 | 5.41 | 2.82 | 4.22 | 2.00 | 4.38 |
| Down | ENSMUSG00000026807 | -1.10 | 6.08E-03 | Ak8           | protein_coding | 3.86 | 4.24 | 4.13 | 4.50 | 2.97 | 3.17 | 3.59 | 3.81 |
| Down | ENSMUSG00000067010 | -3.23 | 6.09E-03 | Vmn2r10       | protein_coding | 3.38 | 4.34 | 4.34 | 4.50 | 2.00 | 2.44 | 2.00 | 3.12 |
| Down | ENSMUSG00000020434 | -2.36 | 6.10E-03 | 4921536K21Rik | protein_coding | 3.86 | 3.57 | 3.70 | 3.78 | 2.25 | 2.78 | 2.00 | 2.92 |
| Down | ENSMUSG00000028558 | -2.22 | 6.10E-03 | Gair4         | protein_coding | 4.22 | 4.01 | 3.93 | 4.05 | 2.00 | 2.78 | 2.24 | 3.48 |
| Up   | ENSMUSG00000005611 | 1.02  | 6.11E-03 | Mrv1          | protein_coding | 4.77 | 5.08 | 4.65 | 5.09 | 5.69 | 6.53 | 5.52 | 5.20 |
| Down | ENSMUSG00000060470 | -1.68 | 6.13E-03 | Adigr3        | protein_coding | 3.91 | 4.05 | 4.17 | 3.55 | 3.29 | 2.47 | 3.07 | 3.06 |
| Down | ENSMUSG00000022219 | -1.45 | 6.14E-03 | Gdab          | protein_coding | 4.89 | 4.17 | 4.48 | 4.48 | 2.74 | 2.79 | 4.28 | 4.28 |
| Down | ENSMUSG00000031101 | -1.58 | 6.16E-03 | Sash3         | protein_coding | 4.26 | 4.01 | 3.75 | 3.90 | 2.00 | 3.43 | 2.71 | 3.39 |
| Down | ENSMUSG00000030406 | -1.73 | 6.17E-03 | Gipr          | protein_coding | 3.18 | 3.63 | 4.13 | 3.86 | 2.13 | 2.34 | 3.07 | 3.23 |
| Down | ENSMUSG00000034329 | -1.42 | 6.18E-03 | Brip1         | protein_coding | 4.32 | 4.27 | 4.80 | 4.37 | 2.90 | 3.52 | 3.40 | 3.74 |
| Down | ENSMUSG00000067615 | -4.73 | 6.19E-03 | Krt81         | protein_coding | 3.10 | 3.73 | 2.64 | 2.86 | 2.00 | 2.00 | 2.00 | 2.24 |
| Down | ENSMUSG00000024936 | -2.39 | 6.19E-03 | Kenk7         | protein_coding | 3.25 | 2.95 | 2.93 | 3.33 | 2.00 | 2.53 | 2.00 | 2.54 |
| Down | ENSMUSG00000045877 | -2.14 | 6.23E-03 | 4933415A04Rik | protein_coding | 3.44 | 3.52 | 3.84 | 3.60 | 3.11 | 2.00 | 2.24 | 2.62 |
| Down | ENSMUSG00000043659 | -1.54 | 6.24E-03 | Npsr1         | protein_coding | 4.45 | 4.50 | 4.52 | 4.92 | 2.66 | 3.11 | 4.33 | 3.17 |
| Down | ENSMUSG00000018907 | -2.49 | 6.26E-03 | Alox12e       | protein_coding | 3.10 | 3.68 | 3.84 | 4.22 | 2.92 | 2.92 | 2.45 | 2.54 |
| Down | ENSMUSG00000029299 | -2.81 | 6.32E-03 | Abcg3         | protein_coding | 3.18 | 3.88 | 3.93 | 3.90 | 2.00 | 2.00 | 2.00 | 2.78 |
| Down | ENSMUSG00000048416 | -1.46 | 6.33E-03 | Mif1          | protein_coding | 4.82 | 4.05 | 3.89 | 4.42 | 4.04 | 4.04 | 2.63 | 3.12 |
| Down | ENSMUSG00000024691 | -1.53 | 6.35E-03 | Fam111a       | protein_coding | 4.93 | 5.02 | 3.84 | 4.22 | 3.73 | 3.73 | 2.35 | 3.29 |
| Down | ENSMUSG00000062659 | -2.55 | 6.37E-03 | Olfr461       | protein_coding | 4.18 | 4.20 | 4.17 | 4.19 | 3.35 | 2.00 | 2.92 | 2.92 |
| Down | ENSMUSG00000115343 | -4.61 | 6.38E-03 | Vmn1r21       | protein_coding | 2.30 | 2.43 | 3.01 | 3.08 | 2.00 | 2.00 | 2.12 | 2.12 |
| Down | ENSMUSG00000039616 | -1.50 | 6.38E-03 | Moccs         | protein_coding | 3.44 | 4.91 | 4.01 | 4.05 | 2.98 | 3.63 | 3.44 | 3.44 |
| Down | ENSMUSG00000049588 | -2.35 | 6.42E-03 | Ccdc69        | protein_coding | 3.67 | 3.63 | 2.74 | 3.60 | 2.25 | 2.00 | 2.54 | 2.78 |
| Down | ENSMUSG00000035606 | -1.13 | 6.45E-03 | Ky            | protein_coding | 5.19 | 5.31 | 5.07 | 4.91 | 3.23 | 4.51 | 4.00 | 4.59 |
| Down | ENSMUSG00000049098 | -3.43 | 6.50E-03 | Olfr147       | protein_coding | 3.77 | 3.83 | 3.23 | 4.19 | 2.00 | 2.00 | 2.70 | 2.70 |
| Down | ENSMUSG00000092032 | -1.87 | 6.55E-03 | Vmn2r59       | protein_coding | 3.91 | 4.95 | 4.68 | 5.19 | 2.97 | 3.63 | 3.63 | 3.12 |
| Down | ENSMUSG00000054901 | -1.19 | 6.57E-03 | Arhgef33      | protein_coding | 5.31 | 4.86 | 5.07 | 4.82 | 3.31 | 4.82 | 4.87 | 4.31 |
| Down | ENSMUSG00000031444 | -4.79 | 6.59E-03 | F10           | protein_coding | 2.94 | 2.66 | 3.70 | 3.20 | 2.00 | 2.00 | 2.00 | 2.24 |
| Down | ENSMUSG00000091572 | -2.59 | 6.60E-03 | Vmn2r3        | protein_coding | 4.45 | 4.67 | 4.70 | 5.01 | 2.25 | 2.62 | 2.35 | 3.89 |
| Down | ENSMUSG00000041660 | -2.28 | 6.60E-03 | Bbox1         | protein_coding | 4.07 | 4.64 | 4.40 | 4.87 | 3.69 | 2.92 | 2.00 | 2.85 |
| Down | ENSMUSG00000059460 | -2.66 | 6.61E-03 | Olfr286       | protein_coding | 4.07 | 3.68 | 3.43 | 3.60 | 2.00 | 2.53 | 2.45 | 2.70 |
| Down | ENSMUSG00000058163 | -2.09 | 6.61E-03 | Gms431        | protein_coding | 3.72 | 3.19 | 4.17 | 4.10 | 2.82 | 2.70 | 2.71 | 2.71 |
| Down | ENSMUSG00000039098 | -1.19 | 6.61E-03 | Gm9767        | protein_coding | 5.47 | 4.56 | 4.30 | 4.63 | 3.89 | 4.10 | 4.07 | 3.23 |
| Down | ENSMUSG00000031173 | -4.10 | 6.71E-03 | Otc           | protein_coding | 2.54 | 3.33 | 3.78 | 3.78 | 2.00 | 2.00 | 2.13 | 2.44 |
| Down | ENSMUSG00000060131 | -2.32 | 6.71E-03 | Atp8b4        | protein_coding | 4.11 | 4.74 | 4.73 | 4.02 | 2.37 | 2.70 | 3.40 | 2.99 |
| Down | ENSMUSG00000059327 | -1.18 | 6.71E-03 | Eda           | protein_coding | 5.10 | 5.10 | 5.11 | 5.44 | 5.11 | 4.49 | 4.79 | 3.89 |
| Down | ENSMUSG00000029788 | -2.75 | 6.74E-03 | Cpa5          | protein_coding | 3.18 | 2.86 | 4.09 | 3.65 | 2.66 | 2.00 | 2.00 | 2.62 |
| Down | ENSMUSG00000072980 | -2.02 | 6.76E-03 | Olp5          | protein_coding | 3.50 | 3.52 | 3.93 | 3.50 | 3.55 | 2.12 | 2.45 | 2.12 |
| Down | ENSMUSG00000005628 | -1.91 | 6.78E-03 | Tmod4         | protein_coding | 3.31 | 3.46 | 3.01 | 3.55 | 2.57 | 2.24 | 2.00 | 2.99 |
| Down | ENSMUSG00000037446 | -1.75 | 6.78E-03 | Tulp1         | protein_coding | 3.86 | 3.92 | 3.36 | 4.31 | 3.63 | 2.70 | 3.13 | 3.17 |
| Down | ENSMUSG00000027720 | -4.50 | 6.81E-03 | Il2           | protein_coding | 2.75 | 2.16 | 2.93 | 2.86 | 2.00 | 2.00 | 2.00 | 2.12 |
| Down | ENSMUSG00000073926 | -3.97 | 6.84E-03 | Olfr653       | protein_coding | 3.50 | 3.63 | 2.60 | 3.94 | 2.47 | 2.00 | 2.00 | 2.24 |
| Down | ENSMUSG00000059900 | -2.26 | 6.84E-03 | Tmem40        | protein_coding | 4.07 | 3.52 | 3.49 | 3.82 | 3.23 | 2.00 | 2.00 | 2.70 |
| Down | ENSMUSG00000107677 | -2.06 | 6.85E-03 | Olfr316       | protein_coding | 3.31 | 4.27 | 4.09 | 4.02 | 2.00 | 2.98 | 2.00 | 3.48 |
| Down | ENSMUSG00000029026 | -2.39 | 6.87E-03 | Trp73         | protein_coding | 4.72 | 4.64 | 5.09 | 5.13 | 4.17 | 3.47 | 2.00 | 4.02 |
| Down | ENSMUSG00000041696 | -1.32 | 6.87E-03 | Rasl12        | protein_coding | 3.61 | 3.78 | 5.02 | 4.74 | 3.29 | 2.70 | 3.71 | 3.85 |
| Down | ENSMUSG00000027379 | -2.55 | 6.89E-03 | Bub1          | protein_coding | 3.72 | 3.57 | 3.89 | 3.89 | 2.00 | 2.92 | 2.00 | 2.92 |
| Down | ENSMUSG00000047686 | -1.94 | 6.90E-03 | Rtp3          | protein_coding | 5.06 | 5.06 | 5.06 | 5.06 | 2.00 | 2.44 | 3.48 | 2.62 |
| Down | ENSMUSG00000074003 | -2.47 | 6.93E-03 | Gucy2d        | protein_coding | 2.65 | 3.33 | 3.23 | 3.90 | 2.74 | 2.12 | 2.35 | 2.12 |
| Down | ENSMUSG00000010830 | -2.20 | 6.94E-03 | Kdelr3        | protein_coding | 2.75 | 2.16 | 3.65 | 2.86 | 2.00 | 2.24 | 2.00 | 2.70 |
| Down | ENSMUSG00000075104 | -3.17 | 6.96E-03 | Olfr1219      | protein_coding | 3.61 | 3.68 | 3.54 | 4.25 | 2.35 | 2.00 | 2.35 | 2.62 |
| Down | ENSMUSG00000025701 | -1.46 | 6.98E-03 | Alox5         | protein_coding | 3.91 | 4.17 | 3.43 | 3.98 | 3.45 | 3.05 | 2.00 | 3.12 |
| Down | ENSMUSG00000022220 | -2.14 | 7.00E-03 | Adcy4         | protein_coding | 4.22 | 3.88 | 3.84 | 4.82 | 2.00 | 3.61 | 2.54 | 2.92 |
| Down | ENSMUSG00000038227 | -1.76 | 7.00E-03 | Hoxa9         | protein_coding | 3.44 | 3.46 | 3.60 | 3.39 | 2.37 | 2.53 | 2.63 | 2.85 |
| Down | ENSMUSG00000045440 | -2.10 | 7.11E-03 | Insm2         | protein_coding | 3.31 | 2.76 | 2.64 | 3.55 | 2.13 | 2.00 | 2.79 | 2.34 |
| Up   | ENSMUSG00000020218 | 1.78  | 7.14E-03 | Wif1          | protein_coding | 3.50 | 2.95 | 3.93 | 3.60 | 4.84 | 4.68 | 4.52 | 5.43 |
| Down | ENSMUSG00000046643 | -3.41 | 7.14E-03 | Olfr218       | protein_coding | 2.75 | 2.95 | 3.36 | 3.39 | 2.00 | 2.34 | 2.00 | 2.24 |
| Down | ENSMUSG00000043020 | -1.24 | 7.15E-03 | Wdr63         | protein_coding | 4.18 | 4.56 | 4.20 | 4.48 | 2.97 | 3.69 | 3.75 | 3.29 |
| Down | ENSMUSG00000113255 | -1.81 | 7.16E-03 | Tes3-ps       | protein_coding | 3.44 | 3.11 | 3.23 | 2.69 | 2.00 | 2.53 | 2.00 | 2.00 |
| Down | ENSMUSG00000075302 | -1.57 | 7.16E-03 | Erich2        | protein_coding | 4.89 | 4.05 | 3.70 | 5.17 | 2.90 | 4.24 | 2.71 | 3.29 |
| Down | ENSMUSG00000023085 | -1.11 | 7.20E-03 | Tegln         | protein_coding | 3.77 | 4.37 | 4.75 | 4.53 | 3.69 | 2.85 | 4.19 | 3.23 |
| Down | ENSMUSG00000079362 | -1.97 | 7.22     |               |                |      |      |      |      |      |      |      |      |

|      |                    |       |          |               |                |      |      |      |      |      |      |      |      |
|------|--------------------|-------|----------|---------------|----------------|------|------|------|------|------|------|------|------|
| Down | ENSMUSG00000030148 | -2.56 | 7.37E-03 | Clec4a2       | protein_coding | 3.91 | 3.73 | 4.54 | 4.31 | 2.37 | 3.33 | 2.00 | 2.62 |
| Down | ENSMUSG00000095932 | -2.75 | 7.38E-03 | Vmn1r49       | protein_coding | 3.77 | 4.31 | 3.70 | 4.39 | 2.47 | 2.44 | 2.00 | 3.12 |
| Down | ENSMUSG00000021335 | -2.86 | 7.43E-03 | Slc17a1       | protein_coding | 4.07 | 3.46 | 2.74 | 3.50 | 2.66 | 2.00 | 2.35 | 2.24 |
| Down | ENSMUSG00000047786 | -1.60 | 7.45E-03 | Lix1          | protein_coding | 3.31 | 3.52 | 4.09 | 4.37 | 2.90 | 2.24 | 2.93 | 3.39 |
| Down | ENSMUSG00000075217 | -2.99 | 7.51E-03 | 4833423E24Rik | protein_coding | 4.07 | 3.83 | 3.70 | 3.60 | 2.07 | 2.53 | 2.00 | 2.80 |
| Down | ENSMUSG00000028860 | -2.79 | 7.51E-03 | Sytl8         | protein_coding | 2.85 | 3.92 | 4.13 | 3.21 | 2.57 | 2.12 | 2.00 | 2.70 |
| Down | ENSMUSG00000051922 | -2.49 | 7.53E-03 | Gnrf1f09      | protein_coding | 2.43 | 3.95 | 2.34 | 3.98 | 2.00 | 2.00 | 2.00 | 2.82 |
| Down | ENSMUSG00000047115 | -1.49 | 7.54E-03 | Fam221a       | protein_coding | 4.51 | 4.41 | 3.65 | 4.55 | 3.64 | 2.92 | 2.79 | 3.57 |
| Down | ENSMUSG00000029414 | -1.45 | 7.54E-03 | Kntc1         | protein_coding | 5.33 | 5.19 | 5.19 | 5.00 | 3.29 | 3.33 | 4.38 | 4.50 |
| Down | ENSMUSG00000022824 | -3.04 | 7.56E-03 | Muc13         | protein_coding | 3.10 | 3.68 | 2.64 | 3.60 | 2.00 | 2.70 | 2.00 | 2.12 |
| Down | ENSMUSG00000029184 | -3.05 | 7.60E-03 | Olfir109      | protein_coding | 4.18 | 4.37 | 3.54 | 4.28 | 2.00 | 2.53 | 2.54 | 2.78 |
| Down | ENSMUSG00000047534 | -1.37 | 7.60E-03 | Mis18bp1      | protein_coding | 4.42 | 4.31 | 4.34 | 4.72 | 3.04 | 3.11 | 4.00 | 3.44 |
| Down | ENSMUSG00000022876 | -1.70 | 7.64E-03 | Samsn1        | protein_coding | 4.51 | 4.01 | 3.97 | 4.67 | 2.74 | 2.62 | 3.83 | 3.12 |
| Up   | ENSMUSG00000047963 | 1.20  | 7.69E-03 | Stbd1         | protein_coding | 4.75 | 4.44 | 3.43 | 4.48 | 5.49 | 5.74 | 4.82 | 5.27 |
| Down | ENSMUSG00000026668 | -2.43 | 7.75E-03 | Ucma          | protein_coding | 4.15 | 4.09 | 2.74 | 3.65 | 2.97 | 2.00 | 2.00 | 2.85 |
| Up   | ENSMUSG00000043375 | 1.55  | 7.79E-03 | Pcare         | protein_coding | 3.38 | 2.95 | 3.54 | 3.82 | 3.45 | 4.99 | 4.97 | 4.59 |
| Down | ENSMUSG00000051029 | -1.55 | 7.79E-03 | Serpinb1b     | protein_coding | 4.07 | 4.37 | 3.16 | 4.67 | 3.50 | 2.62 | 3.24 | 3.06 |
| Down | ENSMUSG00000047259 | -1.11 | 7.79E-03 | Mc4r          | protein_coding | 5.19 | 5.26 | 5.05 | 5.00 | 3.50 | 4.49 | 3.50 | 4.81 |
| Down | ENSMUSG00000029683 | -3.18 | 7.82E-03 | Lmo2          | protein_coding | 3.25 | 3.52 | 4.49 | 3.78 | 2.97 | 2.00 | 2.00 | 2.24 |
| Down | ENSMUSG00000025477 | -1.15 | 7.89E-03 | Abcc2         | protein_coding | 4.67 | 4.52 | 5.00 | 4.58 | 3.96 | 3.73 | 3.24 | 4.14 |
| Down | ENSMUSG00000025194 | -1.29 | 7.90E-03 | C130026121Rik | protein_coding | 4.98 | 4.64 | 4.80 | 5.28 | 3.40 | 4.22 | 3.95 | 3.95 |
| Down | ENSMUSG00000069792 | -5.21 | 7.91E-03 | Wfdc17        | protein_coding | 3.67 | 2.76 | 2.29 | 3.01 | 2.00 | 2.12 | 2.00 | 2.00 |
| Down | ENSMUSG00000003283 | -1.48 | 7.91E-03 | Hck           | protein_coding | 3.77 | 4.20 | 3.60 | 3.94 | 2.00 | 3.11 | 3.45 | 2.99 |
| Down | ENSMUSG00000051663 | -2.93 | 7.94E-03 | Pcdhb1        | protein_coding | 4.03 | 3.88 | 3.30 | 3.60 | 2.82 | 2.24 | 2.00 | 2.34 |
| Down | ENSMUSG00000035836 | -5.71 | 7.96E-03 | Ugt2b1        | protein_coding | 3.10 | 3.73 | 3.23 | 3.01 | 2.00 | 2.00 | 2.00 | 2.12 |
| Down | ENSMUSG00000030399 | -2.06 | 7.96E-03 | Ckm           | protein_coding | 3.25 | 2.66 | 3.54 | 3.98 | 2.00 | 2.00 | 2.93 | 2.78 |
| Down | ENSMUSG00000035383 | -3.03 | 7.99E-03 | Pmch          | protein_coding | 2.75 | 3.39 | 3.09 | 3.01 | 2.00 | 2.12 | 2.35 | 2.24 |
| Down | ENSMUSG00000031070 | -2.79 | 8.00E-03 | Mrgprf        | protein_coding | 3.77 | 3.19 | 2.74 | 3.55 | 2.00 | 2.00 | 2.54 | 2.54 |
| Down | ENSMUSG00000043336 | -1.12 | 8.00E-03 | Filip1l       | protein_coding | 6.02 | 5.67 | 6.18 | 5.85 | 4.76 | 4.66 | 4.24 | 5.64 |
| Down | ENSMUSG00000050150 | -1.22 | 8.04E-03 | Sic9b1        | protein_coding | 3.91 | 4.27 | 4.05 | 4.63 | 3.50 | 3.56 | 2.54 | 3.66 |
| Down | ENSMUSG00000030869 | -3.16 | 8.05E-03 | Fam24a        | protein_coding | 2.65 | 2.66 | 2.74 | 2.69 | 2.00 | 2.00 | 2.00 | 2.34 |
| Down | ENSMUSG00000001128 | -1.30 | 8.09E-03 | Ctp           | protein_coding | 3.38 | 4.01 | 4.49 | 4.55 | 2.97 | 2.62 | 3.75 | 3.53 |
| Down | ENSMUSG00000007819 | -3.95 | 8.16E-03 | Rnf148        | protein_coding | 3.81 | 3.92 | 3.36 | 3.52 | 3.00 | 2.00 | 2.00 | 2.44 |
| Down | ENSMUSG00000031595 | -2.03 | 8.20E-03 | Pdgfrf        | protein_coding | 3.25 | 3.92 | 4.17 | 4.42 | 3.04 | 3.04 | 3.29 | 2.71 |
| Down | ENSMUSG00000026429 | -2.17 | 8.23E-03 | Ube2t         | protein_coding | 4.03 | 3.68 | 3.70 | 3.74 | 2.13 | 2.00 | 3.30 | 2.70 |
| Down | ENSMUSG00000009108 | -3.00 | 8.25E-03 | Gnat2         | protein_coding | 4.22 | 3.52 | 3.01 | 3.27 | 2.00 | 2.00 | 2.00 | 2.99 |
| Down | ENSMUSG00000015316 | -1.73 | 8.27E-03 | Slamf1        | protein_coding | 4.42 | 4.41 | 3.54 | 4.22 | 2.74 | 3.43 | 2.79 | 3.12 |
| Down | ENSMUSG00000032207 | -2.77 | 8.33E-03 | Lipc          | protein_coding | 3.81 | 3.68 | 3.75 | 3.60 | 2.00 | 2.00 | 2.00 | 3.23 |
| Down | ENSMUSG00000079679 | -1.96 | 8.33E-03 | Vwde          | protein_coding | 4.26 | 4.17 | 4.40 | 4.42 | 2.57 | 2.62 | 3.13 | 3.53 |
| Down | ENSMUSG00000027276 | -1.61 | 8.34E-03 | Jag1          | protein_coding | 5.42 | 5.14 | 5.72 | 5.81 | 4.03 | 4.10 | 2.13 | 5.10 |
| Down | ENSMUSG00000063954 | -2.21 | 8.37E-03 | Hist2haa2     | protein_coding | 3.31 | 3.52 | 3.23 | 3.45 | 2.82 | 2.34 | 2.00 | 2.44 |
| Down | ENSMUSG00000030228 | -1.29 | 8.38E-03 | Plk3c2g       | protein_coding | 5.33 | 5.08 | 5.26 | 5.37 | 4.22 | 3.97 | 3.97 | 4.61 |
| Down | ENSMUSG00000024402 | -3.48 | 8.42E-03 | Lta           | protein_coding | 3.38 | 2.76 | 3.09 | 3.39 | 2.00 | 2.12 | 2.00 | 2.44 |
| Down | ENSMUSG00000042821 | -3.62 | 8.47E-03 | Snai1         | protein_coding | 2.54 | 2.95 | 3.36 | 3.33 | 2.00 | 2.00 | 2.45 | 2.00 |
| Down | ENSMUSG00000025197 | -3.03 | 8.47E-03 | Cyp2c23       | protein_coding | 3.38 | 3.93 | 3.54 | 3.94 | 2.13 | 2.24 | 2.00 | 2.70 |
| Down | ENSMUSG00000008937 | -1.47 | 8.48E-03 | Mmp19         | protein_coding | 4.32 | 4.05 | 5.29 | 4.63 | 2.13 | 4.30 | 2.79 | 4.36 |
| Down | ENSMUSG00000031506 | -2.38 | 8.54E-03 | Ptprf         | protein_coding | 3.61 | 3.11 | 3.64 | 3.61 | 2.13 | 2.00 | 2.00 | 3.23 |
| Down | ENSMUSG00000072812 | -1.58 | 8.54E-03 | Ahnak2        | protein_coding | 4.80 | 3.88 | 4.42 | 4.12 | 2.25 | 3.69 | 3.35 | 3.17 |
| Down | ENSMUSG00000032369 | -2.13 | 8.58E-03 | Plscr1        | protein_coding | 3.86 | 3.26 | 3.75 | 4.05 | 2.00 | 2.53 | 3.13 | 2.62 |
| Down | ENSMUSG00000045678 | -2.51 | 8.60E-03 | Olfir1489     | protein_coding | 4.03 | 4.89 | 4.37 | 4.78 | 2.00 | 3.05 | 2.79 | 3.39 |
| Down | ENSMUSG00000021880 | -2.28 | 8.60E-03 | Rnase6        | protein_coding | 3.25 | 4.13 | 3.84 | 3.74 | 2.00 | 2.24 | 2.71 | 3.12 |
| Down | ENSMUSG00000020395 | -1.43 | 8.64E-03 | Ilk           | protein_coding | 4.54 | 4.34 | 4.49 | 4.60 | 2.66 | 3.56 | 3.45 | 3.85 |
| Down | ENSMUSG00000046942 | -3.41 | 8.67E-03 | Mageb16       | protein_coding | 2.94 | 2.86 | 3.49 | 3.74 | 2.37 | 2.24 | 2.00 | 2.12 |
| Down | ENSMUSG00000009900 | -4.49 | 8.71E-03 | Wnt3a         | protein_coding | 2.94 | 2.86 | 3.36 | 2.86 | 2.00 | 2.00 | 2.00 | 2.24 |
| Down | ENSMUSG00000020057 | -1.06 | 8.72E-03 | Dram1         | protein_coding | 3.99 | 4.44 | 4.43 | 4.37 | 3.00 | 3.17 | 3.35 | 3.53 |
| Down | ENSMUSG00000069308 | -3.01 | 8.76E-03 | Hist1h2bp     | protein_coding | 2.85 | 2.55 | 2.29 | 2.77 | 2.00 | 2.24 | 2.00 | 2.12 |
| Down | ENSMUSG00000026331 | -2.76 | 8.76E-03 | Sico6c1       | protein_coding | 3.50 | 3.57 | 2.64 | 3.82 | 2.57 | 2.24 | 2.24 | 2.44 |
| Down | ENSMUSG00000020718 | -1.14 | 8.83E-03 | Polg2         | protein_coding | 4.82 | 4.67 | 5.01 | 4.70 | 3.73 | 2.71 | 3.73 | 3.81 |
| Down | ENSMUSG00000008937 | -1.93 | 8.85E-03 | Tgfbf3l       | protein_coding | 2.43 | 3.11 | 3.01 | 3.39 | 2.00 | 2.62 | 2.45 | 2.24 |
| Down | ENSMUSG00000031077 | -1.05 | 8.85E-03 | Fadd          | protein_coding | 5.08 | 4.67 | 4.70 | 4.78 | 4.00 | 4.27 | 4.28 | 4.28 |
| Down | ENSMUSG00000058678 | -3.25 | 8.86E-03 | Lipm          | protein_coding | 3.50 | 3.52 | 3.60 | 3.94 | 2.00 | 2.00 | 2.00 | 2.70 |
| Down | ENSMUSG00000029707 | -2.13 | 8.87E-03 | Fscn3         | protein_coding | 2.85 | 3.57 | 3.54 | 3.82 | 2.44 | 2.00 | 2.00 | 2.78 |
| Down | ENSMUSG00000061928 | -2.38 | 8.88E-03 | Dsg1b         | protein_coding | 3.81 | 3.88 | 4.24 | 4.15 | 2.57 | 2.53 | 2.00 | 3.29 |
| Down | ENSMUSG00000026395 | -1.75 | 8.94E-03 | Ptprc         | protein_coding | 5.55 | 6.11 | 5.83 | 6.07 | 5.19 | 4.40 | 2.13 | 4.38 |
| Down | ENSMUSG00000024338 | -1.67 | 8.95E-03 | Psmb8         | protein_coding | 3.56 | 4.20 | 4.30 | 4.58 | 3.69 | 2.12 | 2.86 | 3.29 |
| Down | ENSMUSG00000050105 | -2.02 | 9.01E-03 | Grp1          | protein_coding | 3.50 | 4.17 | 3.89 | 3.15 | 2.37 | 2.34 | 2.63 | 3.12 |
| Down | ENSMUSG00000046207 | -1.43 | 9.04E-03 | Plk3r6        | protein_coding | 3.31 | 4.47 | 4.75 | 4.12 | 2.13 | 3.43 | 3.40 | 3.66 |
| Down | ENSMUSG00000024600 | -2.57 | 9.05E-03 | Slc27a6       | protein_coding | 3.67 | 3.46 | 3.65 | 4.19 | 2.00 | 2.78 | 2.45 | 2.62 |
| Down | ENSMUSG00000094672 | -2.66 | 9.07E-03 | Vmn2r25       | protein_coding | 3.44 | 4.24 | 4.43 | 4.34 | 2.82 | 3.11 | 2.00 | 2.34 |
| Down | ENSMUSG00000037139 | -1.04 | 9.08E-03 | Myom3         | protein_coding | 4.65 | 4.53 | 4.78 | 5.25 | 4.31 | 3.47 | 3.67 | 4.31 |
| Down | ENSMUSG00000035683 | -2.14 | 9.13E-03 | Melk          | protein_coding | 3.31 | 3.68 | 3.97 | 2.71 | 2.00 | 2.24 | 2.24 | 3.12 |
| Down | ENSMUSG00000008937 | -3.73 | 9.14E-03 | Olfir427      | protein_coding | 2.94 | 3.97 | 3.54 | 3.86 | 2.00 | 2.12 | 2.13 | 2.54 |
| Down | ENSMUSG00000023447 | -1.22 | 9.19E-03 | Npc1l1        | protein_coding | 4.42 | 4.09 | 3.97 | 4.42 | 3.35 | 3.11 | 2.00 | 3.63 |
| Down | ENSMUSG00000041012 | -1.20 | 9.19E-03 | Cttnb9        | protein_coding | 4.80 | 4.41 | 3.97 | 4.70 | 3.35 | 4.07 | 3.07 | 4.38 |
| Down | ENSMUSG00000074452 | -1.45 | 9.22E-03 | Pate2         | protein_coding | 3.86 | 4.44 | 3.65 | 4.25 | 2.74 | 3.05 | 3.19 | 3.44 |
| Down | ENSMUSG00000043782 | -3.80 | 9.24E-03 | Bicdl2        | protein_coding | 3.18 | 3.73 | 3.49 | 2.94 | 2.00 | 2.34 | 2.00 | 2.24 |
| Down | ENSMUSG00000050613 | -4.45 | 9.26E-03 | Olfir125      | protein_coding | 3.18 | 3.73 | 2.93 | 4.15 | 2.00 | 2.00 | 2.00 | 2.44 |
| Down | ENSMUSG00000032915 | -3.66 | 9.29E-03 | Adgre4        | protein_coding | 3.91 | 3.52 | 3.23 | 3.60 | 2.00 | 2.00 | 2.00 | 2.70 |
| Up   | ENSMUSG00000025213 | 1.23  | 9.33E-03 | Kazald1       | protein_coding | 3.67 | 4.05 | 3.43 | 3.55 | 4.66 | 3.69 | 5.05 | 4.83 |
| Down | ENSMUSG00000069305 | -1.45 | 9.33E-03 | Hist1h4n      | protein_coding | 4.59 | 3.88 | 4.40 | 4.12 | 3.40 | 3.11 | 3.30 | 3.23 |
| Down | ENSMUSG00000095864 | -2.57 | 9.34E-03 | Vmn1r77       | protein_coding | 4.26 | 5.14 | 4.43 | 4.85 | 3.69 | 2.78 | 2.13 | 2.78 |
| Down | ENSMUSG00000054000 | -1.05 | 9.34E-03 | Tusc1         | protein_coding | 4.77 | 5.08 | 5.46 | 4.74 | 3.81 | 4.66 | 3.30 | 4.50 |
| Down | ENSMUSG00000082980 | -4.80 | 9.35E-03 | Olfir1274-ps  | protein_coding | 3.31 | 4.13 | 3.49 | 3.08 | 2.25 | 2.00 | 2.00 | 2.12 |
| Down | ENSMUSG00000000409 | -1.26 | 9.35E-03 | Lck           | protein_coding | 3.95 | 4.58 | 4.01 | 4.25 | 3.04 | 3.38 | 2.93 | 3.81 |
| Down | ENSMUSG00000024033 | -1.26 | 9.36E-03 | Rsph1         | protein_coding | 5.92 | 5.52 | 4.57 | 6.37 | 4.47 | 5.10 | 3.07 | 5.08 |
| Down | ENSMUSG00000028602 | -2.39 | 9.40E-03 | Tnfrsf8       | protein_coding | 3.31 | 3.78 | 3.54 | 3.21 | 2.25 | 2.00 | 2.00 | 3.12 |
| Down | ENSMUSG00000030236 | -3.14 | 9.41E-03 | Sico1h2       | protein_coding | 4.32 | 3.26 | 3.70 | 3.98 | 2.00 | 2.53 | 2.00 | 2.54 |
| Down | ENSMUSG00000031965 |       |          |               |                |      |      |      |      |      |      |      |      |

|      |                     |       |           |               |                |       |       |       |       |      |      |      |      |
|------|---------------------|-------|-----------|---------------|----------------|-------|-------|-------|-------|------|------|------|------|
| Down | ENSMUSG00000024778  | -1.91 | 9.53E-03  | Fas           | protein_coding | 4.45  | 4.17  | 4.49  | 3.50  | 2.82 | 3.05 | 2.00 | 3.57 |
| Down | ENSMUSG00000009876  | -2.12 | 9.54E-03  | Cox4i2        | protein_coding | 2.94  | 3.46  | 3.43  | 3.15  | 2.25 | 2.00 | 2.71 | 2.54 |
| Down | ENSMUSG00000027961  | -1.02 | 9.55E-03  | Lrrc39        | protein_coding | 4.89  | 5.41  | 5.48  | 5.35  | 3.04 | 4.49 | 4.45 | 5.05 |
| Down | ENSMUSG000000057751 | -1.36 | 9.58E-03  | Megf6         | protein_coding | 4.39  | 4.41  | 4.46  | 5.02  | 3.17 | 2.12 | 4.13 | 3.05 |
| Down | ENSMUSG000000051313 | -2.73 | 9.65E-03  | Olfir1262     | protein_coding | 4.07  | 3.46  | 3.80  | 4.31  | 2.00 | 2.00 | 2.71 | 4.06 |
| Down | ENSMUSG000000073491 | -3.27 | 9.66E-03  | Ifi1213       | protein_coding | 4.07  | 4.20  | 4.34  | 4.02  | 2.00 | 2.53 | 2.00 | 2.99 |
| Down | ENSMUSG000000019444 | -2.83 | 9.68E-03  | Gata4         | protein_coding | 3.44  | 3.57  | 3.49  | 3.44  | 2.13 | 2.78 | 2.00 | 2.92 |
| Down | ENSMUSG000000046886 | -1.75 | 9.68E-03  | Zfp474        | protein_coding | 3.56  | 3.97  | 3.43  | 3.98  | 2.57 | 3.07 | 2.62 | 3.07 |
| Down | ENSMUSG000000053441 | -2.49 | 9.67E-03  | Adams19       | protein_coding | 5.00  | 4.91  | 4.82  | 5.40  | 2.90 | 3.17 | 2.54 | 3.85 |
| Down | ENSMUSG000000023159 | -1.62 | 9.67E-03  | Psg29         | protein_coding | 4.15  | 4.31  | 3.49  | 4.05  | 2.47 | 3.11 | 3.13 | 3.17 |
| Down | ENSMUSG000000031023 | -1.07 | 9.67E-03  | Akip1         | protein_coding | 4.57  | 4.41  | 4.89  | 4.45  | 3.40 | 3.28 | 3.59 | 4.46 |
| Down | ENSMUSG000000001827 | -1.92 | 9.68E-03  | Folr1         | protein_coding | 5.75  | 4.31  | 3.80  | 5.82  | 4.06 | 3.91 | 2.13 | 3.78 |
| Down | ENSMUSG000000069267 | -2.78 | 9.70E-03  | Hist1h3b      | protein_coding | 2.43  | 4.13  | 3.60  | 3.08  | 2.00 | 2.00 | 2.24 | 2.85 |
| Down | ENSMUSG000000053469 | -1.36 | 9.73E-03  | Tg            | protein_coding | 4.82  | 4.50  | 4.80  | 4.89  | 3.04 | 3.80 | 3.07 | 4.41 |
| Down | ENSMUSG000000004951 | -2.36 | 9.75E-03  | Hspb1         | protein_coding | 3.50  | 3.11  | 2.93  | 3.45  | 2.00 | 2.00 | 3.07 | 2.00 |
| Down | ENSMUSG000000023959 | -1.05 | 9.82E-03  | Clic5         | protein_coding | 4.45  | 4.69  | 5.69  | 5.28  | 4.03 | 3.69 | 4.79 | 4.20 |
| Down | ENSMUSG000000096373 | -3.45 | 9.84E-03  | Vmn2r31       | protein_coding | 3.02  | 4.27  | 4.13  | 3.86  | 2.00 | 2.00 | 2.00 | 2.99 |
| Down | ENSMUSG000000040969 | -2.52 | 9.90E-03  | Arhgef38      | protein_coding | 4.45  | 4.01  | 4.46  | 5.35  | 2.00 | 2.78 | 2.35 | 3.89 |
| Down | ENSMUSG000000091648 | -1.90 | 9.91E-03  | C2c04d        | protein_coding | 3.91  | 3.46  | 3.60  | 3.98  | 2.00 | 2.34 | 2.93 | 3.23 |
| Down | ENSMUSG000000028182 | -1.45 | 9.92E-03  | Lrr1q3        | protein_coding | 3.25  | 3.78  | 4.13  | 4.25  | 2.82 | 2.65 | 3.00 | 2.54 |
| Down | ENSMUSG000000031097 | -4.05 | 9.96E-03  | Tnni2         | protein_coding | 2.54  | 3.03  | 3.49  | 3.15  | 2.00 | 2.00 | 2.34 | 2.00 |
| Down | ENSMUSG000000006313 | -3.09 | 9.97E-03  | Upk1a         | protein_coding | 3.02  | 2.55  | 3.43  | 3.27  | 2.00 | 2.34 | 2.00 | 2.34 |
| Down | ENSMUSG000000075525 | -3.34 | 1.51E-12  | Gm10849       | pseudogene     | 4.87  | 5.06  | 5.43  | 4.39  | 2.37 | 3.05 | 2.00 | 3.23 |
| Down | ENSMUSG000000054304 | -1.48 | 2.48E-04  | D130007C19Rik | pseudogene     | 3.95  | 4.41  | 4.09  | 4.12  | 2.57 | 2.62 | 3.67 | 3.44 |
| Down | ENSMUSG000000074467 | -1.73 | 2.93E-04  | Gm10702       | pseudogene     | 4.80  | 5.02  | 4.85  | 4.58  | 4.13 | 2.44 | 3.00 | 3.85 |
| Down | ENSMUSG000000046145 | -2.13 | 7.45E-04  | 1700018M17Rik | pseudogene     | 3.91  | 3.52  | 3.60  | 3.27  | 2.74 | 2.24 | 2.24 | 2.85 |
| Down | ENSMUSG000000092837 | -5.18 | 5.55E-215 | Rpph1         | ribozyme       | 14.03 | 13.89 | 13.67 | 13.82 | 8.65 | 8.80 | 8.75 | 8.55 |
| Down | ENSMUSG000000088088 | -8.38 | 3.03E-98  | Rmrp          | ribozyme       | 11.31 | 11.03 | 11.00 | 11.00 | 3.17 | 3.84 | 3.19 | 3.29 |
| Down | ENSMUSG000000080544 | -4.62 | 2.78E-04  | Gm22714       | ribozyme       | 2.65  | 2.43  | 2.29  | 2.59  | 2.00 | 2.00 | 2.00 | 2.00 |
| Down | ENSMUSG000000065887 | -2.28 | 2.55E-05  | n-R5s185      | rRNA           | 2.30  | 3.03  | 3.80  | 3.08  | 2.47 | 2.34 | 2.00 | 2.44 |
| Down | ENSMUSG000000084431 | -4.65 | 1.43E-04  | n-R5s48       | rRNA           | 2.54  | 3.11  | 2.64  | 2.89  | 2.00 | 2.00 | 2.00 | 2.00 |
| Down | ENSMUSG000000087721 | -4.59 | 2.54E-04  | Gm28280       | rRNA           | 2.85  | 2.55  | 2.93  | 2.59  | 2.00 | 2.00 | 2.00 | 2.12 |
| Down | ENSMUSG000000065652 | -4.42 | 2.63E-04  | n-R5s141      | rRNA           | 2.30  | 2.55  | 2.64  | 2.27  | 2.00 | 2.00 | 2.00 | 2.00 |
| Down | ENSMUSG000000065102 | -4.05 | 1.34E-03  | n-R5s50       | rRNA           | 2.30  | 2.55  | 2.64  | 2.00  | 2.00 | 2.00 | 2.00 | 2.00 |
| Down | ENSMUSG000000089465 | -4.31 | 2.20E-03  | Gm23702       | rRNA           | 2.16  | 2.43  | 2.74  | 2.27  | 2.00 | 2.00 | 2.00 | 2.00 |
| Down | ENSMUSG000000065837 | -3.73 | 7.41E-03  | n-R5s85       | rRNA           | 2.43  | 2.43  | 2.15  | 2.14  | 2.00 | 2.00 | 2.00 | 2.00 |
| Down | ENSMUSG000000077309 | -4.28 | 7.88E-03  | n-R5s8        | rRNA           | 2.00  | 2.00  | 2.84  | 2.59  | 2.00 | 2.00 | 2.00 | 2.00 |
| Down | ENSMUSG000000087881 | -4.16 | 5.11E-124 | Gm22442       | scarRNA        | 8.18  | 8.06  | 8.13  | 7.93  | 3.50 | 4.10 | 4.54 | 4.55 |
| Down | ENSMUSG000000089417 | -6.63 | 9.82E-62  | Gm22009       | scarRNA        | 8.17  | 8.07  | 8.16  | 8.52  | 2.37 | 2.53 | 3.13 | 3.06 |
| Down | ENSMUSG000000088185 | -3.11 | 7.17E-49  | Scarna2       | scarRNA        | 8.92  | 8.80  | 8.84  | 8.78  | 6.00 | 5.21 | 6.37 | 5.36 |
| Down | ENSMUSG000000088529 | -7.00 | 1.27E-22  | Gm26083       | scarRNA        | 6.22  | 5.80  | 5.93  | 5.88  | 2.00 | 2.00 | 2.35 | 2.24 |
| Down | ENSMUSG000000089281 | -5.31 | 1.18E-21  | Scarna6       | scarRNA        | 5.70  | 5.15  | 5.04  | 5.34  | 2.00 | 2.62 | 2.00 | 2.44 |
| Down | ENSMUSG000000087968 | -3.13 | 6.59E-11  | Gm25395       | scarRNA        | 6.20  | 5.56  | 5.67  | 5.41  | 3.96 | 2.44 | 3.54 | 2.62 |
| Down | ENSMUSG000000089536 | -5.57 | 1.12E-06  | Scarna3a      | scarRNA        | 2.54  | 2.55  | 3.23  | 2.00  | 2.94 | 2.00 | 2.00 | 2.00 |
| Down | ENSMUSG000000105288 | -5.30 | 7.98E-06  | Gm29820       | scarRNA        | 2.75  | 2.66  | 2.84  | 2.69  | 2.00 | 2.00 | 2.00 | 2.00 |
| Down | ENSMUSG000000088008 | -4.13 | 2.50E-05  | Gm29492       | scarRNA        | 2.85  | 3.39  | 3.43  | 2.77  | 2.00 | 2.00 | 2.00 | 2.34 |
| Down | ENSMUSG000000098151 | -5.25 | 3.65E-05  | Gm26347       | scarRNA        | 2.65  | 2.76  | 2.93  | 2.49  | 2.00 | 2.00 | 2.00 | 2.00 |
| Down | ENSMUSG000000088254 | -4.69 | 6.10E-04  | Gm24289       | scarRNA        | 2.43  | 2.43  | 2.43  | 2.15  | 2.00 | 2.00 | 2.00 | 2.00 |
| Down | ENSMUSG000000089235 | -3.32 | 9.27E-04  | Gm23119       | scarRNA        | 2.94  | 3.68  | 3.01  | 2.94  | 2.00 | 2.53 | 2.00 | 2.00 |
| Down | ENSMUSG000000106307 | -4.04 | 1.57E-03  | Gm23370       | scarRNA        | 2.54  | 2.00  | 2.29  | 2.49  | 2.00 | 2.00 | 2.00 | 2.00 |
| Down | ENSMUSG000000088158 | -2.94 | 4.67E-03  | Scarna3b      | scarRNA        | 2.94  | 2.43  | 2.25  | 2.77  | 2.00 | 2.00 | 2.35 | 2.00 |
| Down | ENSMUSG000000088990 | -3.66 | 4.88E-03  | Gm22767       | scarRNA        | 2.94  | 2.30  | 2.42  | 2.86  | 2.00 | 2.00 | 2.00 | 2.24 |
| Down | ENSMUSG000000099587 | -4.17 | 3.33E-66  | Gm28967       | sense_intronic | 7.52  | 7.35  | 7.31  | 7.31  | 3.69 | 3.80 | 4.04 | 3.12 |
| Down | ENSMUSG000000085133 | -1.14 | 3.41E-23  | B930095G15Rik | sense_intronic | 8.39  | 8.60  | 8.25  | 8.30  | 7.16 | 7.23 | 7.05 | 7.61 |
| Down | ENSMUSG000000097042 | -2.72 | 1.05E-11  | Gm17491       | sense_intronic | 3.95  | 5.50  | 5.02  | 3.90  | 4.42 | 2.54 | 3.44 | 2.54 |
| Down | ENSMUSG000000109460 | -3.36 | 3.88E-11  | Gm45591       | sense_intronic | 3.91  | 3.92  | 5.31  | 4.15  | 2.66 | 2.24 | 2.13 | 2.92 |
| Down | ENSMUSG000000105824 | -3.40 | 4.49E-11  | Gm43466       | sense_intronic | 3.67  | 4.01  | 4.24  | 3.90  | 2.52 | 2.34 | 2.35 | 2.10 |
| Down | ENSMUSG000000108297 | -4.28 | 5.54E-11  | Gm44167       | sense_intronic | 3.72  | 3.92  | 4.01  | 3.82  | 2.00 | 2.00 | 2.00 | 2.62 |
| Down | ENSMUSG000000106099 | -1.76 | 2.28E-10  | Gm42664       | sense_intronic | 4.87  | 4.58  | 4.57  | 4.91  | 2.66 | 3.47 | 3.59 | 3.74 |
| Down | ENSMUSG000000106229 | -3.32 | 4.55E-07  | Gm19409       | sense_intronic | 3.50  | 3.73  | 4.05  | 3.90  | 2.37 | 2.12 | 2.24 | 2.54 |
| Down | ENSMUSG000000075538 | -6.73 | 9.02E-10  | Gm10855       | sense_intronic | 3.81  | 3.46  | 4.40  | 4.09  | 2.00 | 2.00 | 2.00 | 2.12 |
| Down | ENSMUSG000000105864 | -3.13 | 1.32E-09  | Gm10484       | sense_intronic | 3.38  | 3.97  | 3.93  | 4.50  | 2.47 | 2.78 | 2.24 | 2.12 |
| Down | ENSMUSG000000104969 | -2.49 | 2.90E-09  | Gm43445       | sense_intronic | 3.18  | 3.83  | 4.17  | 4.15  | 2.74 | 2.34 | 2.35 | 2.78 |
| Down | ENSMUSG000000112734 | -2.19 | 3.19E-09  | Gm47644       | sense_intronic | 4.67  | 4.05  | 3.97  | 4.31  | 2.82 | 2.98 | 2.13 | 3.34 |
| Down | ENSMUSG000000102302 | -1.52 | 3.88E-09  | Gm38190       | sense_intronic | 4.87  | 5.14  | 5.78  | 5.42  | 4.68 | 3.61 | 3.63 | 4.08 |
| Down | ENSMUSG000000105677 | -3.61 | 7.56E-09  | Gm43328       | sense_intronic | 3.56  | 3.39  | 4.57  | 3.86  | 2.13 | 2.00 | 2.35 | 2.62 |
| Down | ENSMUSG000000106032 | -2.42 | 1.74E-08  | Gm42463       | sense_intronic | 4.18  | 4.53  | 4.01  | 3.94  | 2.62 | 2.62 | 2.00 | 3.29 |
| Down | ENSMUSG000000099924 | -2.07 | 2.76E-08  | Gm28320       | sense_intronic | 3.72  | 3.78  | 4.46  | 4.58  | 2.44 | 2.44 | 2.54 | 3.12 |
| Down | ENSMUSG000000110471 | -6.33 | 3.23E-08  | Gm45823       | sense_intronic | 3.31  | 3.19  | 3.01  | 3.39  | 2.00 | 2.00 | 2.00 | 2.00 |
| Down | ENSMUSG000000114253 | -2.61 | 1.54E-07  | Gm47798       | sense_intronic | 3.77  | 4.58  | 4.05  | 4.31  | 2.53 | 2.00 | 2.00 | 3.17 |
| Down | ENSMUSG000000107688 | -6.10 | 2.01E-07  | Gm44091       | sense_intronic | 3.44  | 2.43  | 3.09  | 3.72  | 2.00 | 2.00 | 2.00 | 2.20 |
| Down | ENSMUSG000000104284 | -1.99 | 3.41E-07  | Gm10862       | sense_intronic | 4.29  | 3.97  | 3.93  | 4.37  | 2.66 | 2.92 | 2.35 | 3.44 |
| Down | ENSMUSG000000097894 | -5.88 | 4.21E-07  | Gm26543       | sense_intronic | 3.19  | 3.19  | 2.84  | 3.27  | 2.00 | 2.00 | 2.00 | 2.00 |
| Down | ENSMUSG000000105561 | -1.31 | 5.08E-07  | Gm43482       | sense_intronic | 3.99  | 4.50  | 4.50  | 4.60  | 3.61 | 2.86 | 3.71 | 3.55 |
| Down | ENSMUSG000000100158 | -2.30 | 9.62E-07  | Gm28119       | sense_intronic | 3.69  | 3.57  | 3.75  | 3.65  | 2.25 | 2.85 | 2.35 | 2.54 |
| Down | ENSMUSG000000102136 | -3.32 | 1.11E-06  | Gm37107       | sense_intronic | 3.72  | 2.66  | 3.93  | 4.65  | 2.47 | 2.00 | 2.00 | 2.78 |
| Down | ENSMUSG000000105818 | -3.36 | 1.13E-06  | Gm43256       | sense_intronic | 3.56  | 3.68  | 3.36  | 4.22  | 2.24 | 2.24 | 2.13 | 2.44 |
| Down | ENSMUSG000000102142 | -2.06 | 1.63E-06  | Gm26930       | sense_intronic | 3.18  | 4.01  | 3.93  | 3.94  | 3.04 | 2.70 | 2.13 | 2.70 |
| Down | ENSMUSG000000113041 | -5.71 | 1.78E-06  | Gm48302       | sense_intronic | 2.43  | 3.26  | 2.64  | 3.15  | 2.00 | 2.00 | 2.00 | 2.00 |
| Down | ENSMUSG000000112229 | -5.55 | 1.81E-06  | Gm48086       | sense_intronic | 3.50  | 2.76  | 4.09  | 3.90  | 2.00 | 2.00 | 2.00 | 2.24 |
| Down | ENSMUSG000000105137 | -3.68 | 1.85E-06  | Gm42869       | sense_intronic | 2.94  | 3.73  | 2.64  | 3.60  | 2.00 | 2.00 | 2.00 | 2.54 |
| Down | ENSMUSG000000102397 | -5.62 | 2.32E-06  | Gm37573       | sense_intronic | 3.02  | 2.66  | 2.74  | 3.01  | 2.00 | 2.00 | 2.00 | 2.24 |
| Down | ENSMUSG000000101778 | -4.47 | 2.52E-06  | Gm29488       | sense_intronic | 3.44  | 3.39  | 3.16  | 3.33  | 2.00 | 2.00 | 2.00 | 2.24 |
| Down | ENSMUSG000000101450 | -3.76 | 3.17E-06  | Gm28941       | sense_intronic | 2.75  | 3.88  | 3.43  | 3.15  | 2.57 | 2.00 | 2.00 | 2.00 |
| Down | ENSMUSG000000086012 | -2.61 | 3.19E-06  | Gm15902       | sense_intronic | 3.02  | 3.33  | 3.33  | 3.90  | 2.25 | 2.34 | 2.45 | 2.44 |
| Down | ENSMUSG000000102517 | -2.81 | 4.56E-06  | Gm38085       | sense_intronic | 3.38  | 3.88  | 3.30  | 3.55  | 2.   |      |      |      |



|      |                    |       |          |               |                   |      |      |      |      |      |      |      |      |
|------|--------------------|-------|----------|---------------|-------------------|------|------|------|------|------|------|------|------|
| Down | ENSMUSG00000106287 | -5.53 | 1.30E-05 | Gm43585       | sense_intronic    | 2.94 | 2.66 | 2.93 | 2.77 | 2.00 | 2.00 | 2.00 | 2.00 |
| Down | ENSMUSG00000105304 | -1.59 | 1.37E-05 | Gm43696       | sense_intronic    | 4.26 | 4.01 | 4.09 | 4.31 | 3.04 | 3.38 | 2.00 | 3.57 |
| Down | ENSMUSG00000106432 | -3.83 | 1.69E-05 | Gm43259       | sense_intronic    | 3.02 | 3.39 | 3.60 | 2.00 | 2.24 | 2.13 | 2.24 | 2.24 |
| Down | ENSMUSG00000113575 | -5.45 | 2.26E-05 | A930023M06Rik | sense_intronic    | 2.94 | 2.55 | 2.15 | 3.27 | 2.00 | 2.00 | 2.00 | 2.00 |
| Down | ENSMUSG00000104973 | -3.12 | 2.40E-05 | A530041M06Rik | sense_intronic    | 3.18 | 3.11 | 3.23 | 3.01 | 2.25 | 2.00 | 2.13 | 2.34 |
| Down | ENSMUSG00000105287 | -3.11 | 2.61E-05 | Gm43577       | sense_intronic    | 3.18 | 3.03 | 3.49 | 3.27 | 2.00 | 2.00 | 2.24 | 2.54 |
| Down | ENSMUSG00000095527 | -1.89 | 2.69E-05 | Gm15535       | sense_intronic    | 4.99 | 3.98 | 4.48 | 2.13 | 2.78 | 3.39 | 2.78 | 3.39 |
| Down | ENSMUSG00000104867 | -5.46 | 2.81E-05 | Gm43728       | sense_intronic    | 4.22 | 3.39 | 3.36 | 3.15 | 2.00 | 2.00 | 2.24 | 2.24 |
| Down | ENSMUSG00000106212 | -4.24 | 2.86E-05 | Gm43112       | sense_intronic    | 2.43 | 3.11 | 3.70 | 3.27 | 2.00 | 2.00 | 2.13 | 2.24 |
| Down | ENSMUSG00000097559 | -2.32 | 3.01E-05 | D430018E03Rik | sense_intronic    | 3.67 | 3.73 | 3.97 | 3.45 | 2.25 | 2.00 | 2.13 | 3.34 |
| Down | ENSMUSG00000105412 | -5.10 | 3.03E-05 | Gm43768       | sense_intronic    | 2.30 | 2.66 | 3.01 | 3.55 | 2.13 | 2.00 | 2.00 | 2.00 |
| Down | ENSMUSG00000102401 | -2.70 | 3.08E-05 | Gm37864       | sense_intronic    | 3.02 | 3.78 | 3.60 | 3.39 | 2.00 | 2.00 | 2.93 | 2.24 |
| Down | ENSMUSG00000104925 | -4.08 | 3.43E-05 | Gm43061       | sense_intronic    | 3.44 | 2.86 | 2.54 | 3.39 | 2.00 | 2.12 | 2.00 | 2.24 |
| Down | ENSMUSG00000086916 | -1.43 | 3.75E-05 | Gm15903       | sense_intronic    | 4.15 | 4.13 | 3.97 | 4.28 | 3.17 | 3.11 | 3.40 | 2.99 |
| Down | ENSMUSG00000114709 | -2.38 | 3.85E-05 | Gm47920       | sense_intronic    | 3.72 | 3.52 | 2.64 | 3.94 | 2.13 | 2.78 | 2.00 | 2.70 |
| Down | ENSMUSG00000107937 | -2.68 | 4.30E-05 | Gm44200       | sense_intronic    | 2.85 | 3.57 | 4.05 | 3.69 | 2.00 | 2.24 | 2.00 | 3.06 |
| Down | ENSMUSG00000104737 | -3.78 | 5.24E-05 | Gm42937       | sense_intronic    | 3.18 | 3.26 | 3.09 | 3.15 | 2.00 | 2.44 | 2.00 | 2.00 |
| Down | ENSMUSG00000085176 | -4.33 | 6.75E-05 | Gm15397       | sense_intronic    | 3.18 | 3.33 | 3.60 | 2.77 | 2.00 | 2.12 | 2.00 | 2.24 |
| Down | ENSMUSG00000090582 | -4.08 | 7.17E-05 | Gm17024       | sense_intronic    | 3.25 | 3.11 | 2.84 | 3.21 | 2.13 | 2.00 | 2.24 | 2.00 |
| Down | ENSMUSG00000111323 | -4.89 | 7.65E-05 | Gm48129       | sense_intronic    | 2.16 | 2.76 | 2.64 | 2.49 | 2.00 | 2.00 | 2.00 | 2.00 |
| Down | ENSMUSG00000090135 | -4.63 | 1.03E-04 | Gm15809       | sense_intronic    | 2.75 | 2.16 | 3.01 | 2.94 | 2.00 | 2.00 | 2.12 | 2.00 |
| Down | ENSMUSG00000106710 | -2.21 | 1.48E-04 | Gm43166       | sense_intronic    | 2.75 | 3.46 | 3.97 | 3.27 | 2.57 | 2.00 | 2.62 | 2.62 |
| Down | ENSMUSG00000104910 | -2.77 | 1.56E-04 | Gm43331       | sense_intronic    | 4.29 | 3.19 | 2.93 | 2.86 | 2.00 | 2.63 | 2.54 | 2.54 |
| Down | ENSMUSG00000100394 | -3.37 | 1.61E-04 | Gm28791       | sense_intronic    | 2.85 | 3.11 | 3.09 | 2.77 | 2.00 | 2.00 | 2.44 | 2.44 |
| Down | ENSMUSG00000102494 | -2.60 | 1.68E-04 | Gm36988       | sense_intronic    | 3.44 | 3.52 | 3.84 | 3.33 | 2.00 | 2.44 | 2.00 | 2.92 |
| Down | ENSMUSG00000113094 | -4.79 | 2.03E-04 | Gm47447       | sense_intronic    | 2.54 | 2.86 | 2.64 | 3.15 | 2.00 | 2.00 | 2.12 | 2.12 |
| Down | ENSMUSG00000093858 | -2.17 | 2.11E-04 | Gm19967       | sense_intronic    | 3.44 | 3.03 | 3.23 | 3.15 | 2.00 | 2.12 | 2.35 | 2.85 |
| Down | ENSMUSG00000102816 | -1.72 | 2.46E-04 | Gm37814       | sense_intronic    | 3.86 | 3.46 | 3.70 | 3.74 | 2.13 | 2.85 | 2.24 | 3.39 |
| Down | ENSMUSG00000089746 | -4.71 | 2.51E-04 | Gm3513        | sense_intronic    | 2.54 | 2.43 | 2.54 | 2.59 | 2.00 | 2.00 | 2.00 | 2.00 |
| Down | ENSMUSG00000105986 | -5.25 | 2.65E-04 | Gm43065       | sense_intronic    | 3.02 | 2.30 | 2.93 | 2.49 | 2.00 | 2.00 | 2.00 | 2.00 |
| Down | ENSMUSG00000106061 | -3.13 | 2.71E-04 | Gm43773       | sense_intronic    | 2.75 | 2.86 | 3.75 | 2.94 | 2.00 | 2.53 | 2.00 | 2.12 |
| Down | ENSMUSG00000108101 | -4.81 | 2.81E-04 | Gm45738       | sense_intronic    | 2.43 | 2.43 | 2.93 | 2.38 | 2.00 | 2.00 | 2.00 | 2.00 |
| Down | ENSMUSG00000102357 | -2.81 | 2.82E-04 | Gm38348       | sense_intronic    | 3.51 | 3.63 | 2.64 | 2.25 | 2.00 | 2.00 | 2.24 | 2.24 |
| Down | ENSMUSG00000113765 | -1.32 | 3.71E-04 | Gm48027       | sense_intronic    | 3.73 | 4.05 | 4.05 | 3.77 | 2.97 | 3.50 | 4.34 | 3.50 |
| Down | ENSMUSG00000105062 | -2.93 | 4.04E-04 | Gm43113       | sense_intronic    | 2.75 | 2.66 | 2.93 | 3.86 | 2.00 | 2.34 | 2.00 | 2.44 |
| Down | ENSMUSG00000114851 | -2.46 | 4.11E-04 | Gm46409       | sense_intronic    | 4.03 | 3.83 | 4.40 | 4.45 | 2.25 | 3.07 | 3.17 | 3.17 |
| Down | ENSMUSG00000104721 | -4.96 | 4.29E-04 | Gm42696       | sense_intronic    | 2.30 | 2.55 | 2.84 | 2.69 | 2.00 | 2.00 | 2.00 | 2.00 |
| Down | ENSMUSG00000106202 | -4.41 | 4.66E-04 | Gm43727       | sense_intronic    | 3.10 | 3.73 | 3.01 | 3.21 | 2.00 | 2.00 | 2.34 | 2.34 |
| Down | ENSMUSG00000085811 | -1.67 | 4.75E-04 | Cep112it      | sense_intronic    | 4.15 | 3.78 | 4.34 | 4.02 | 3.69 | 2.62 | 2.63 | 2.85 |
| Down | ENSMUSG00000105842 | -2.24 | 5.25E-04 | Gm43329       | sense_intronic    | 3.56 | 3.88 | 3.01 | 3.82 | 2.00 | 2.00 | 3.24 | 2.44 |
| Down | ENSMUSG00000108390 | -3.33 | 6.82E-04 | Gm39038       | sense_intronic    | 2.16 | 2.95 | 3.70 | 2.49 | 2.00 | 2.00 | 2.45 | 2.00 |
| Down | ENSMUSG00000112153 | -1.00 | 7.50E-04 | Gm47591       | sense_intronic    | 4.03 | 4.05 | 4.52 | 4.22 | 3.43 | 2.82 | 3.87 | 3.66 |
| Down | ENSMUSG00000106197 | -2.08 | 7.92E-04 | Gm42717       | sense_intronic    | 3.25 | 2.95 | 3.75 | 3.15 | 2.97 | 2.00 | 2.13 | 2.44 |
| Down | ENSMUSG00000100313 | -4.53 | 8.38E-04 | Gm28323       | sense_intronic    | 3.02 | 2.95 | 2.15 | 2.59 | 2.00 | 2.00 | 2.12 | 2.00 |
| Down | ENSMUSG00000111434 | -2.35 | 9.32E-04 | Gm47121       | sense_intronic    | 3.25 | 3.43 | 3.01 | 3.27 | 2.00 | 2.53 | 2.00 | 2.44 |
| Down | ENSMUSG00000102930 | -2.07 | 1.03E-03 | Gm38115       | sense_intronic    | 2.75 | 2.11 | 3.60 | 2.69 | 2.25 | 2.44 | 2.00 | 2.92 |
| Down | ENSMUSG00000094887 | -4.11 | 1.19E-03 | Gm11749       | sense_intronic    | 2.16 | 2.00 | 2.54 | 2.69 | 2.00 | 2.00 | 2.00 | 2.00 |
| Down | ENSMUSG00000107472 | -4.70 | 1.27E-03 | Gm44265       | sense_intronic    | 2.00 | 2.95 | 3.23 | 2.69 | 2.00 | 2.00 | 2.13 | 2.00 |
| Down | ENSMUSG00000105229 | -3.42 | 1.28E-03 | Gm43149       | sense_intronic    | 2.43 | 2.55 | 3.23 | 3.45 | 2.00 | 2.00 | 2.44 | 2.44 |
| Down | ENSMUSG00000092559 | -4.71 | 1.39E-03 | Gm20475       | sense_intronic    | 2.00 | 3.03 | 2.15 | 2.69 | 2.00 | 2.00 | 2.00 | 2.00 |
| Down | ENSMUSG00000104764 | -4.18 | 1.61E-03 | Gm43066       | sense_intronic    | 2.65 | 2.16 | 3.09 | 2.16 | 2.00 | 2.00 | 2.12 | 2.12 |
| Down | ENSMUSG00000102331 | -1.57 | 1.67E-03 | Gm19938       | sense_intronic    | 3.18 | 3.26 | 3.36 | 3.15 | 2.82 | 2.70 | 2.35 | 2.24 |
| Down | ENSMUSG00000085908 | -4.73 | 1.83E-03 | Gm14209       | sense_intronic    | 2.16 | 2.86 | 2.64 | 2.38 | 2.00 | 2.00 | 2.00 | 2.00 |
| Down | ENSMUSG00000114598 | -1.90 | 1.92E-03 | D130062J10Rik | sense_intronic    | 2.94 | 3.52 | 3.54 | 3.65 | 2.47 | 2.00 | 2.00 | 3.29 |
| Down | ENSMUSG00000105659 | -2.28 | 2.00E-03 | 4930509H03Rik | sense_intronic    | 3.25 | 3.11 | 2.64 | 2.94 | 2.00 | 2.86 | 2.00 | 2.00 |
| Down | ENSMUSG00000106107 | -4.20 | 2.44E-03 | Gm43190       | sense_intronic    | 3.44 | 2.66 | 3.54 | 2.86 | 2.00 | 2.00 | 2.34 | 2.34 |
| Down | ENSMUSG00000091079 | -3.09 | 2.52E-03 | Gm17105       | sense_intronic    | 2.94 | 2.76 | 2.93 | 2.69 | 2.00 | 2.00 | 2.49 | 2.00 |
| Down | ENSMUSG00000087342 | -3.09 | 2.76E-03 | Gm12238       | sense_intronic    | 2.43 | 2.95 | 2.64 | 2.59 | 2.00 | 2.00 | 2.35 | 2.59 |
| Down | ENSMUSG00000114602 | -1.54 | 3.17E-03 | Gm49223       | sense_intronic    | 3.18 | 3.63 | 3.36 | 3.27 | 2.00 | 2.53 | 2.93 | 2.85 |
| Down | ENSMUSG00000095793 | -3.81 | 3.52E-03 | Gm26971       | sense_intronic    | 2.54 | 2.16 | 2.84 | 2.27 | 2.13 | 2.00 | 2.00 | 2.00 |
| Down | ENSMUSG00000113183 | -1.27 | 3.66E-03 | Gm47664       | sense_intronic    | 4.18 | 3.19 | 3.65 | 3.60 | 2.13 | 2.78 | 3.30 | 3.29 |
| Down | ENSMUSG00000104874 | -2.35 | 3.86E-03 | Gm43387       | sense_intronic    | 2.43 | 2.43 | 3.16 | 3.21 | 2.57 | 2.00 | 2.00 | 2.24 |
| Down | ENSMUSG00000085093 | -4.19 | 4.12E-03 | Gm12737       | sense_intronic    | 2.30 | 2.66 | 2.29 | 2.27 | 2.00 | 2.00 | 2.00 | 2.00 |
| Down | ENSMUSG00000105753 | -1.85 | 4.38E-03 | Gm43847       | sense_intronic    | 3.67 | 3.63 | 2.74 | 3.21 | 2.00 | 2.93 | 2.85 | 2.85 |
| Down | ENSMUSG00000104592 | -5.20 | 4.59E-03 | Gm42721       | sense_intronic    | 2.54 | 2.43 | 3.36 | 2.14 | 2.00 | 2.00 | 2.00 | 2.00 |
| Down | ENSMUSG00000109399 | -4.05 | 4.62E-03 | Gm44982       | sense_intronic    | 2.65 | 2.30 | 2.15 | 2.27 | 2.00 | 2.00 | 2.00 | 2.00 |
| Down | ENSMUSG00000105655 | -1.95 | 4.76E-03 | Gm42659       | sense_intronic    | 3.50 | 3.88 | 2.29 | 3.55 | 2.00 | 2.98 | 2.00 | 2.78 |
| Down | ENSMUSG00000090168 | -2.56 | 4.93E-03 | D630014O11Rik | sense_intronic    | 2.85 | 2.55 | 3.36 | 3.27 | 2.00 | 2.44 | 2.00 | 2.44 |
| Down | ENSMUSG00000085724 | -4.18 | 5.31E-03 | Gm13096       | sense_intronic    | 2.00 | 2.66 | 2.42 | 2.38 | 2.00 | 2.00 | 2.00 | 2.00 |
| Down | ENSMUSG00000108267 | -1.91 | 5.69E-03 | Gm44190       | sense_intronic    | 2.94 | 3.03 | 3.23 | 3.08 | 2.00 | 2.24 | 2.13 | 2.00 |
| Down | ENSMUSG00000110087 | -2.53 | 5.80E-03 | Gm45309       | sense_intronic    | 2.00 | 3.46 | 2.42 | 2.51 | 2.00 | 2.53 | 2.00 | 2.12 |
| Down | ENSMUSG00000099954 | -2.24 | 6.35E-03 | Gm28112       | sense_intronic    | 3.25 | 2.95 | 2.64 | 3.55 | 2.82 | 2.00 | 2.00 | 2.34 |
| Down | ENSMUSG00000092722 | -1.75 | 6.35E-03 | Gm6378        | sense_intronic    | 3.44 | 3.92 | 3.92 | 3.90 | 2.00 | 3.35 | 2.00 | 3.35 |
| Down | ENSMUSG00000098204 | -1.95 | 6.45E-03 | Gm26984       | sense_intronic    | 3.67 | 3.39 | 4.23 | 3.27 | 2.00 | 2.13 | 2.82 | 2.82 |
| Down | ENSMUSG00000104639 | -3.39 | 6.54E-03 | Gm42939       | sense_intronic    | 2.43 | 2.43 | 2.64 | 3.39 | 2.37 | 2.00 | 2.00 | 2.00 |
| Down | ENSMUSG00000113203 | -4.02 | 7.45E-03 | Gm47587       | sense_intronic    | 2.43 | 3.03 | 2.29 | 2.27 | 2.00 | 2.12 | 2.00 | 2.00 |
| Down | ENSMUSG00000100603 | -2.93 | 7.46E-03 | 1700129L04Rik | sense_intronic    | 3.44 | 2.95 | 3.70 | 4.12 | 2.00 | 2.00 | 2.54 | 2.54 |
| Down | ENSMUSG00000106522 | -4.33 | 7.67E-03 | Gm42871       | sense_intronic    | 2.75 | 2.86 | 2.29 | 2.59 | 2.00 | 2.12 | 2.00 | 2.00 |
| Down | ENSMUSG00000105199 | -1.68 | 7.86E-03 | Gm43581       | sense_intronic    | 2.94 | 4.17 | 3.27 | 2.82 | 2.34 | 2.54 | 2.78 | 2.78 |
| Down | ENSMUSG00000113886 | -4.01 | 8.06E-03 | Gm48905       | sense_intronic    | 2.00 | 2.30 | 2.29 | 2.69 | 2.00 | 2.00 | 2.00 | 2.00 |
| Down | ENSMUSG00000085638 | -1.85 | 9.53E-03 | Gm15521       | sense_intronic    | 3.72 | 3.46 | 3.36 | 3.39 | 2.00 | 2.78 | 3.19 | 2.00 |
| Down | ENSMUSG00000080705 | -3.69 | 9.74E-03 | Gm11948       | sense_intronic    | 2.30 | 2.55 | 2.29 | 2.59 | 2.00 | 2.00 | 2.13 | 2.00 |
| Up   | ENSMUSG00000047935 | 1.90  | 2.99E-55 | Sox1ot        | sense_overlapping | 7.64 | 7.70 | 7.45 | 9.54 | 9.55 | 9.55 | 9.57 | 9.51 |
| Down | ENSMUSG00000090116 | -4.81 | 9.01E-04 | Gm15680       | sense_overlapping | 2.16 | 2.76 | 2.74 | 2.49 | 2.00 | 2.00 | 2.00 | 2.00 |
| Down | ENSMUSG00000089617 | -4.17 | 3.33E-66 | Scarna10      | snoRNA            | 7.52 | 7.35 | 7.31 | 3.69 | 3.80 | 4.04 | 3.12 | 3.12 |
| Down | ENSMUSG00000077394 | -4.34 | 2.15E-53 | Gm24339       | snoRNA            | 6.05 |      |      |      |      |      |      |      |

|      |                    |       |          |          |        |      |      |      |      |      |      |      |      |
|------|--------------------|-------|----------|----------|--------|------|------|------|------|------|------|------|------|
| Down | ENSMUSG00000089542 | -5.72 | 1.00E-23 | Gm25835  | snoRNA | 5.69 | 5.74 | 5.81 | 5.63 | 2.74 | 2.00 | 2.13 | 2.24 |
| Down | ENSMUSG00000088948 | -3.30 | 3.21E-20 | Gm23262  | snoRNA | 6.49 | 6.17 | 5.73 | 6.26 | 2.66 | 2.98 | 3.71 | 4.05 |
| Down | ENSMUSG00000065259 | -5.81 | 3.46E-19 | Snora30  | snoRNA | 5.19 | 5.17 | 5.05 | 5.07 | 2.00 | 2.00 | 2.00 | 2.24 |
| Down | ENSMUSG00000066549 | -7.02 | 6.94E-19 | Snora74a | snoRNA | 6.34 | 6.43 | 6.13 | 5.94 | 2.00 | 2.00 | 2.00 | 2.62 |
| Down | ENSMUSG00000065353 | -5.57 | 2.04E-18 | Snora73b | snoRNA | 5.95 | 6.46 | 5.78 | 5.94 | 2.00 | 2.00 | 2.00 | 2.44 |
| Down | ENSMUSG00000064380 | -4.08 | 2.56E-18 | Gm26448  | snoRNA | 4.48 | 5.12 | 4.60 | 4.78 | 2.00 | 2.98 | 2.00 | 2.44 |
| Down | ENSMUSG00000064901 | -3.95 | 2.92E-16 | Snora21  | snoRNA | 5.74 | 5.74 | 5.45 | 5.37 | 2.00 | 2.00 | 2.00 | 2.24 |
| Down | ENSMUSG00000080465 | -3.95 | 1.71E-14 | Gm22486  | snoRNA | 4.65 | 4.84 | 4.63 | 4.80 | 2.00 | 2.00 | 2.34 | 2.86 |
| Down | ENSMUSG00000077637 | -2.25 | 3.24E-14 | Gm22771  | snoRNA | 5.42 | 5.72 | 5.35 | 5.07 | 3.04 | 4.01 | 3.35 | 3.78 |
| Down | ENSMUSG00000064816 | -2.38 | 3.26E-14 | Gm22357  | snoRNA | 4.54 | 4.47 | 4.49 | 4.48 | 2.71 | 3.22 | 2.71 | 3.12 |
| Down | ENSMUSG00000064387 | -8.23 | 3.47E-14 | Snora73a | snoRNA | 5.83 | 6.06 | 5.65 | 5.94 | 2.13 | 2.00 | 2.00 | 2.12 |
| Down | ENSMUSG00000087935 | -8.51 | 4.77E-14 | Snora81  | snoRNA | 5.45 | 4.79 | 4.80 | 3.90 | 2.00 | 2.00 | 2.00 | 2.00 |
| Down | ENSMUSG00000064841 | -2.89 | 5.17E-14 | Gm26205  | snoRNA | 4.72 | 4.61 | 4.43 | 5.07 | 3.40 | 2.78 | 2.71 | 2.12 |
| Down | ENSMUSG00000064453 | -2.56 | 1.05E-13 | Snord21  | snoRNA | 4.26 | 4.31 | 4.63 | 4.42 | 2.66 | 2.78 | 2.71 | 2.99 |
| Down | ENSMUSG00000077714 | -5.33 | 3.12E-13 | Snord17  | snoRNA | 5.54 | 5.44 | 5.48 | 5.38 | 2.00 | 2.00 | 2.00 | 2.99 |
| Down | ENSMUSG00000095734 | -1.95 | 3.58E-13 | Gm23767  | snoRNA | 5.54 | 5.30 | 5.59 | 5.54 | 2.00 | 2.70 | 3.75 | 4.31 |
| Down | ENSMUSG00000064451 | -7.98 | 1.40E-12 | Snora23  | snoRNA | 4.59 | 4.34 | 4.43 | 4.19 | 2.00 | 2.00 | 2.00 | 2.00 |
| Down | ENSMUSG00000064655 | -2.74 | 3.48E-12 | Gm25788  | snoRNA | 4.51 | 3.83 | 4.34 | 4.76 | 2.97 | 2.70 | 2.93 | 2.12 |
| Down | ENSMUSG00000064653 | -3.53 | 4.89E-12 | Gm23442  | snoRNA | 4.32 | 4.13 | 4.30 | 3.82 | 3.11 | 2.00 | 2.00 | 2.12 |
| Down | ENSMUSG00000090365 | -4.93 | 9.45E-12 | Gm25776  | snoRNA | 4.67 | 3.57 | 3.97 | 4.22 | 2.00 | 2.00 | 2.24 | 2.34 |
| Down | ENSMUSG00000087819 | -2.60 | 1.04E-11 | Gm25117  | snoRNA | 4.26 | 4.05 | 4.24 | 4.09 | 2.44 | 2.57 | 2.44 | 2.85 |
| Down | ENSMUSG00000064966 | -2.97 | 2.23E-11 | Snord15b | snoRNA | 6.16 | 6.73 | 6.26 | 5.57 | 3.40 | 2.62 | 3.94 | 4.36 |
| Down | ENSMUSG00000077391 | -7.30 | 4.15E-11 | Gm24336  | snoRNA | 4.57 | 4.64 | 4.09 | 4.34 | 2.00 | 2.00 | 2.12 | 2.24 |
| Down | ENSMUSG00000065124 | -3.74 | 5.28E-11 | Snora65  | snoRNA | 3.95 | 4.01 | 3.75 | 4.31 | 2.13 | 2.00 | 2.00 | 2.85 |
| Down | ENSMUSG00000093355 | -6.99 | 4.98E-10 | Snora26  | snoRNA | 3.72 | 3.78 | 3.54 | 3.55 | 2.00 | 2.00 | 2.00 | 2.00 |
| Down | ENSMUSG00000064585 | -3.31 | 5.75E-10 | Gm25129  | snoRNA | 3.95 | 3.92 | 3.65 | 3.69 | 2.00 | 2.12 | 2.24 | 2.78 |
| Down | ENSMUSG00000065087 | -2.95 | 1.39E-09 | Snord22  | snoRNA | 4.62 | 4.09 | 4.78 | 2.57 | 2.00 | 3.24 | 2.62 | 2.24 |
| Down | ENSMUSG00000084708 | -2.43 | 1.92E-09 | Gm22988  | snoRNA | 5.21 | 4.20 | 4.43 | 4.58 | 2.82 | 2.53 | 3.19 | 3.29 |
| Down | ENSMUSG00000077167 | -6.87 | 1.96E-09 | Gm24119  | snoRNA | 4.03 | 3.26 | 3.97 | 2.00 | 2.59 | 2.00 | 2.00 | 2.00 |
| Down | ENSMUSG00000080440 | -3.94 | 3.78E-09 | Gm25848  | snoRNA | 3.81 | 3.68 | 3.36 | 3.65 | 2.00 | 2.62 | 2.00 | 2.00 |
| Down | ENSMUSG00000077506 | -6.62 | 1.30E-08 | Scama9   | snoRNA | 3.02 | 3.39 | 3.60 | 3.55 | 2.00 | 2.00 | 2.00 | 2.00 |
| Down | ENSMUSG00000065041 | -4.20 | 1.74E-08 | Gm24044  | snoRNA | 3.77 | 3.39 | 3.70 | 3.65 | 2.00 | 2.34 | 2.00 | 2.24 |
| Down | ENSMUSG00000065126 | -6.17 | 2.72E-08 | Gm25084  | snoRNA | 3.73 | 3.16 | 3.67 | 3.69 | 2.00 | 2.00 | 2.00 | 2.00 |
| Down | ENSMUSG00000065862 | -6.20 | 3.02E-08 | Gm24029  | snoRNA | 3.02 | 3.52 | 2.93 | 3.33 | 2.00 | 2.00 | 2.00 | 2.00 |
| Down | ENSMUSG00000092730 | -5.97 | 1.20E-07 | Snora24  | snoRNA | 3.72 | 3.19 | 3.30 | 3.55 | 2.00 | 2.00 | 2.00 | 2.12 |
| Down | ENSMUSG00000065287 | -2.79 | 1.64E-07 | Gm24451  | snoRNA | 3.25 | 3.63 | 3.30 | 3.60 | 2.00 | 2.00 | 2.93 | 2.12 |
| Down | ENSMUSG00000064994 | -5.93 | 1.70E-07 | Gm22422  | snoRNA | 3.38 | 3.39 | 3.54 | 3.39 | 2.00 | 2.00 | 2.00 | 2.12 |
| Down | ENSMUSG00000077493 | -2.22 | 1.76E-07 | Snord91a | snoRNA | 5.21 | 4.53 | 4.40 | 4.63 | 2.47 | 3.56 | 2.71 | 3.48 |
| Down | ENSMUSG00000064604 | -5.03 | 2.06E-07 | Snora44  | snoRNA | 3.67 | 4.13 | 3.49 | 3.39 | 2.00 | 2.00 | 2.13 | 2.24 |
| Down | ENSMUSG00000093044 | -5.82 | 3.01E-07 | Snord8   | snoRNA | 3.81 | 3.88 | 3.84 | 2.00 | 2.00 | 2.00 | 2.00 | 2.24 |
| Down | ENSMUSG00000065840 | -5.97 | 3.06E-07 | Gm25187  | snoRNA | 2.65 | 3.39 | 3.16 | 2.86 | 2.00 | 2.00 | 2.00 | 2.00 |
| Down | ENSMUSG00000070063 | -5.90 | 3.08E-07 | Snora33  | snoRNA | 2.85 | 3.39 | 3.01 | 2.69 | 2.00 | 2.00 | 2.00 | 2.00 |
| Down | ENSMUSG00000084421 | -2.55 | 5.15E-07 | Gm25107  | snoRNA | 3.44 | 3.39 | 3.54 | 3.45 | 2.57 | 2.62 | 2.24 | 2.00 |
| Down | ENSMUSG00000064925 | -5.81 | 8.58E-07 | Snora62  | snoRNA | 3.02 | 3.19 | 2.74 | 2.00 | 2.86 | 2.00 | 2.00 | 2.00 |
| Down | ENSMUSG00000064797 | -5.99 | 9.43E-07 | Gm24357  | snoRNA | 3.77 | 3.57 | 3.36 | 3.08 | 2.00 | 2.00 | 2.00 | 2.12 |
| Down | ENSMUSG00000065265 | -5.97 | 9.66E-07 | Gm23455  | snoRNA | 4.22 | 3.57 | 3.80 | 4.12 | 2.00 | 2.00 | 2.00 | 2.24 |
| Down | ENSMUSG00000077625 | -4.86 | 1.22E-06 | Snord4a  | snoRNA | 3.56 | 3.52 | 3.75 | 3.55 | 2.00 | 2.00 | 2.24 | 2.24 |
| Down | ENSMUSG00000087895 | -5.49 | 1.62E-06 | Gm23600  | snoRNA | 2.94 | 3.19 | 3.30 | 3.21 | 2.00 | 2.00 | 2.13 | 2.00 |
| Down | ENSMUSG00000064563 | -3.02 | 1.71E-06 | Snora7a  | snoRNA | 4.80 | 5.26 | 4.93 | 5.00 | 2.37 | 2.00 | 3.75 | 2.85 |
| Down | ENSMUSG00000065097 | -4.45 | 2.80E-06 | Snora16a | snoRNA | 3.77 | 3.33 | 2.93 | 3.15 | 2.00 | 2.00 | 2.24 | 2.12 |
| Down | ENSMUSG00000070167 | -3.79 | 3.03E-06 | Snora57  | snoRNA | 3.50 | 3.26 | 3.36 | 3.90 | 2.13 | 2.00 | 2.00 | 2.54 |
| Down | ENSMUSG00000064858 | -5.73 | 4.17E-06 | Snora43  | snoRNA | 3.38 | 2.76 | 2.84 | 2.59 | 2.00 | 2.00 | 2.00 | 2.00 |
| Down | ENSMUSG00000065304 | -5.47 | 4.20E-06 | Gm23245  | snoRNA | 2.54 | 2.76 | 2.84 | 2.00 | 2.00 | 2.00 | 2.00 | 2.00 |
| Down | ENSMUSG00000077254 | -3.28 | 4.40E-06 | Gm26079  | snoRNA | 3.86 | 4.17 | 4.30 | 3.74 | 2.00 | 2.00 | 3.13 | 2.12 |
| Down | ENSMUSG00000094888 | -5.47 | 4.49E-06 | Gm25120  | snoRNA | 2.75 | 2.95 | 2.64 | 2.86 | 2.00 | 2.00 | 2.00 | 2.00 |
| Down | ENSMUSG00000065822 | -4.06 | 5.30E-06 | Snord15a | snoRNA | 4.26 | 3.63 | 4.17 | 4.05 | 2.00 | 2.00 | 2.00 | 2.12 |
| Down | ENSMUSG00000089509 | -3.45 | 6.22E-06 | Gm23474  | snoRNA | 3.31 | 2.66 | 3.36 | 3.21 | 2.12 | 2.00 | 2.00 | 2.44 |
| Down | ENSMUSG00000065870 | -3.38 | 7.99E-06 | Rnu3a    | snoRNA | 4.36 | 3.03 | 4.49 | 3.99 | 2.00 | 2.00 | 2.54 | 2.00 |
| Down | ENSMUSG00000088108 | -5.33 | 8.55E-06 | Snora47  | snoRNA | 3.10 | 3.52 | 2.64 | 2.13 | 2.00 | 2.00 | 2.00 | 2.70 |
| Down | ENSMUSG00000090461 | -5.23 | 1.06E-05 | Gm22498  | snoRNA | 2.54 | 2.30 | 2.74 | 3.08 | 2.00 | 2.00 | 2.00 | 2.00 |
| Down | ENSMUSG00000064536 | -5.54 | 1.17E-05 | Gm23615  | snoRNA | 2.94 | 3.11 | 2.54 | 2.69 | 2.00 | 2.00 | 2.00 | 2.00 |
| Down | ENSMUSG00000064666 | -5.43 | 1.34E-05 | Snora52  | snoRNA | 3.10 | 2.95 | 2.42 | 2.59 | 2.00 | 2.00 | 2.00 | 2.00 |
| Down | ENSMUSG00000088294 | -1.99 | 1.59E-05 | AF357425 | snoRNA | 3.44 | 3.73 | 3.36 | 3.60 | 3.04 | 2.12 | 2.45 | 2.54 |
| Down | ENSMUSG00000064952 | -5.47 | 2.13E-05 | Gm24920  | snoRNA | 2.85 | 2.95 | 2.42 | 2.94 | 2.00 | 2.00 | 2.00 | 2.00 |
| Up   | ENSMUSG00000093784 | 1.89  | 2.28E-05 | Gm22394  | snoRNA | 2.75 | 3.33 | 3.36 | 3.33 | 4.76 | 3.91 | 4.87 | 4.55 |
| Down | ENSMUSG00000065715 | -5.53 | 2.36E-05 | Snord7   | snoRNA | 2.43 | 3.03 | 3.01 | 2.77 | 2.00 | 2.00 | 2.00 | 2.00 |
| Down | ENSMUSG00000077505 | -4.89 | 2.72E-05 | Gm24233  | snoRNA | 3.44 | 3.03 | 3.16 | 3.27 | 2.00 | 2.12 | 2.00 | 2.12 |
| Down | ENSMUSG00000088059 | -5.32 | 2.90E-05 | Mir1949  | snoRNA | 2.43 | 3.46 | 3.16 | 3.08 | 2.13 | 2.00 | 2.00 | 2.00 |
| Down | ENSMUSG00000064600 | -5.35 | 3.01E-05 | Gm25636  | snoRNA | 2.65 | 2.66 | 2.64 | 3.01 | 2.00 | 2.00 | 2.00 | 2.00 |
| Down | ENSMUSG00000065016 | -5.05 | 3.37E-05 | Snora3   | snoRNA | 2.54 | 2.43 | 3.16 | 2.00 | 2.27 | 2.00 | 2.00 | 2.00 |
| Down | ENSMUSG00000065899 | -4.80 | 4.67E-05 | Gm24523  | snoRNA | 2.94 | 2.66 | 2.84 | 2.86 | 2.13 | 2.00 | 2.00 | 2.00 |
| Down | ENSMUSG00000065686 | -5.18 | 4.72E-05 | Snora5c  | snoRNA | 2.54 | 2.43 | 3.09 | 2.59 | 2.00 | 2.00 | 2.00 | 2.00 |
| Down | ENSMUSG00000095099 | -4.97 | 4.81E-05 | Gm25175  | snoRNA | 2.54 | 2.76 | 2.64 | 2.49 | 2.00 | 2.00 | 2.00 | 2.00 |
| Down | ENSMUSG00000064890 | -5.04 | 6.80E-05 | Gm24201  | snoRNA | 2.16 | 3.03 | 2.64 | 2.69 | 2.00 | 2.00 | 2.00 | 2.00 |
| Down | ENSMUSG00000064620 | -4.97 | 1.20E-04 | Gm22303  | snoRNA | 2.43 | 2.86 | 2.54 | 2.59 | 2.00 | 2.00 | 2.00 | 2.00 |
| Down | ENSMUSG00000084667 | -2.24 | 1.27E-04 | Gm23212  | snoRNA | 3.02 | 2.86 | 3.36 | 3.45 | 2.13 | 2.12 | 2.35 | 2.70 |
| Down | ENSMUSG00000077565 | -3.92 | 1.64E-04 | Gm23201  | snoRNA | 2.85 | 2.95 | 2.42 | 3.60 | 2.00 | 2.00 | 2.35 | 2.00 |
| Down | ENSMUSG00000096677 | -2.05 | 1.72E-04 | Gm24518  | snoRNA | 3.50 | 3.11 | 2.93 | 3.27 | 2.66 | 2.44 | 2.00 | 2.44 |
| Down | ENSMUSG00000065799 | -5.32 | 1.88E-04 | Gm25517  | snoRNA | 2.30 | 2.76 | 2.15 | 3.39 | 2.00 | 2.00 | 2.00 | 2.00 |
| Down | ENSMUSG00000065878 | -4.82 | 2.11E-04 | Snord34  | snoRNA | 2.65 | 2.86 | 2.42 | 2.27 | 2.00 | 2.00 | 2.00 | 2.00 |
| Down | ENSMUSG00000064513 | -3.58 | 2.25E-04 | Snora9   | snoRNA | 2.85 | 2.86 | 3.01 | 3.45 | 2.00 | 2.00 | 2.00 | 2.44 |
| Down | ENSMUSG00000064844 | -4.80 | 2.33E-04 | Gm26202  | snoRNA | 2.85 | 2.00 | 2.64 | 2.59 | 2.00 | 2.00 | 2.00 | 2.00 |
| Down | ENSMUSG00000065750 | -4.95 | 2.69E-04 | Gm23346  | snoRNA | 2.65 | 2.30 | 2.54 | 2.86 | 2.00 | 2.00 | 2.00 | 2.00 |
| Down | ENSMUSG00000064452 | -4.63 | 2.71E-04 | Gm24564  | snoRNA | 2.16 | 2.86 | 2.42 | 2.49 | 2.00 | 2.00 | 2.00 | 2.00 |
| Down | ENSMUSG00000094068 | -4.28 | 2.73E-04 | Gm25156  | snoRNA | 2.94 | 2.86 | 2.93 | 2.94 | 2.00 | 2.12 | 2.00 | 2.12 |
| Down | ENSMUSG00000092819 | -2.18 | 2.73E-04 | Gm23639  | snoRNA | 3.18 | 3.57 | 3.16 | 3.50 | 3.04 | 2.00 | 2.00 | 2.44 |
| Down | ENSMUSG00000095208 | -4.77 | 3.07E-04 | Gm24916  | snoRNA | 2.00 | 2.30 | 3.09 | 3.33 | 2.00 |      |      |      |

|      |                   |       |          |             |       |      |      |      |      |      |      |      |      |
|------|-------------------|-------|----------|-------------|-------|------|------|------|------|------|------|------|------|
| Down | ENSMUSG0000088835 | -1.37 | 4.80E-04 | Gm23547     | snRNA | 5.28 | 5.78 | 5.64 | 5.17 | 4.78 | 3.43 | 4.63 | 4.05 |
| Down | ENSMUSG0000065036 | -4.64 | 4.96E-04 | Gm22362     | snRNA | 2.85 | 2.55 | 2.84 | 2.77 | 2.00 | 2.00 | 2.00 | 2.12 |
| Down | ENSMUSG0000065226 | -4.38 | 5.56E-04 | Gm25791     | snRNA | 3.10 | 2.76 | 3.30 | 2.59 | 2.00 | 2.12 | 2.00 | 2.12 |
| Down | ENSMUSG0000064612 | -4.93 | 5.68E-04 | Gm26457     | snRNA | 2.00 | 2.30 | 2.74 | 3.08 | 2.00 | 2.00 | 2.00 | 2.00 |
| Down | ENSMUSG0000099684 | -4.26 | 6.63E-04 | Gm25989     | snRNA | 2.75 | 2.43 | 3.01 | 2.00 | 2.00 | 2.00 | 2.00 | 2.12 |
| Down | ENSMUSG0000077390 | -5.48 | 7.99E-04 | Gm22661     | snRNA | 3.25 | 2.66 | 2.42 | 2.77 | 2.00 | 2.00 | 2.00 | 2.00 |
| Down | ENSMUSG0000077321 | -4.43 | 6.13E-04 | Snora927    | snRNA | 2.03 | 2.02 | 2.00 | 2.00 | 2.00 | 2.00 | 2.00 | 2.00 |
| Down | ENSMUSG0000065676 | -1.22 | 8.98E-04 | Snord42b    | snRNA | 4.18 | 4.01 | 4.17 | 4.19 | 3.11 | 3.28 | 3.63 | 3.12 |
| Down | ENSMUSG0000064405 | -4.41 | 9.17E-04 | Gm23925     | snRNA | 2.16 | 2.43 | 2.54 | 2.59 | 2.00 | 2.00 | 2.00 | 2.00 |
| Down | ENSMUSG0000065778 | -1.52 | 9.43E-04 | Gm22154     | snRNA | 3.10 | 3.57 | 3.36 | 3.86 | 2.90 | 2.53 | 2.79 | 2.62 |
| Down | ENSMUSG0000077212 | -4.84 | 1.00E-03 | Snord69     | snRNA | 3.18 | 2.16 | 2.64 | 2.00 | 2.00 | 2.00 | 2.00 | 2.00 |
| Down | ENSMUSG0000064621 | -4.16 | 1.04E-03 | Gm26922     | snRNA | 2.43 | 2.16 | 2.84 | 2.77 | 2.13 | 2.00 | 2.00 | 2.00 |
| Down | ENSMUSG0000088308 | -3.99 | 1.09E-03 | Gm24507     | snRNA | 2.16 | 2.66 | 2.15 | 2.94 | 2.00 | 2.00 | 2.00 | 2.12 |
| Down | ENSMUSG0000064427 | -3.71 | 1.12E-03 | Gm22748     | snRNA | 2.30 | 3.46 | 3.09 | 2.59 | 2.00 | 2.00 | 2.00 | 2.34 |
| Down | ENSMUSG0000099411 | -4.02 | 1.19E-03 | Snord16a    | snRNA | 2.75 | 2.76 | 2.54 | 3.08 | 2.00 | 2.12 | 2.00 | 2.12 |
| Down | ENSMUSG0000065272 | -2.87 | 1.20E-03 | Snord57     | snRNA | 3.02 | 3.26 | 3.01 | 2.69 | 2.37 | 2.00 | 2.13 | 2.24 |
| Down | ENSMUSG0000099641 | -2.42 | 1.39E-03 | Gm25615     | snRNA | 3.10 | 2.86 | 2.42 | 3.08 | 2.00 | 2.00 | 2.45 | 2.34 |
| Down | ENSMUSG0000065147 | -3.97 | 1.47E-03 | Snora31     | snRNA | 2.16 | 2.76 | 3.09 | 2.94 | 2.00 | 2.00 | 2.00 | 2.24 |
| Down | ENSMUSG0000065013 | -4.04 | 1.49E-03 | Gm23508     | snRNA | 2.54 | 3.33 | 2.54 | 2.69 | 2.00 | 2.24 | 2.00 | 2.00 |
| Down | ENSMUSG0000093925 | -5.81 | 1.52E-03 | Rnu3b2      | snRNA | 3.10 | 2.86 | 3.09 | 2.77 | 2.00 | 2.00 | 2.00 | 2.00 |
| Down | ENSMUSG0000064767 | -4.64 | 1.57E-03 | Snord35b    | snRNA | 2.43 | 2.16 | 3.09 | 2.14 | 2.00 | 2.00 | 2.00 | 2.00 |
| Down | ENSMUSG0000065669 | -5.29 | 1.71E-03 | Gm22581     | snRNA | 2.65 | 2.55 | 2.74 | 2.94 | 2.00 | 2.00 | 2.00 | 2.00 |
| Down | ENSMUSG0000065282 | -4.40 | 1.74E-03 | Gm24455     | snRNA | 2.00 | 2.55 | 2.42 | 2.69 | 2.00 | 2.00 | 2.00 | 2.00 |
| Down | ENSMUSG0000065022 | -5.10 | 1.79E-03 | AF357341    | snRNA | 2.30 | 2.16 | 3.30 | 2.59 | 2.00 | 2.00 | 2.00 | 2.00 |
| Down | ENSMUSG0000064823 | -2.07 | 1.81E-03 | Snord82     | snRNA | 3.31 | 3.39 | 2.64 | 3.21 | 2.37 | 2.44 | 2.35 | 2.34 |
| Down | ENSMUSG0000089517 | -4.19 | 1.89E-03 | Gm24899     | snRNA | 2.00 | 2.76 | 2.54 | 2.14 | 2.00 | 2.00 | 2.00 | 2.00 |
| Down | ENSMUSG0000099604 | -4.30 | 1.90E-03 | Gm27295     | snRNA | 2.16 | 2.55 | 2.42 | 2.00 | 2.00 | 2.00 | 2.00 | 2.00 |
| Down | ENSMUSG0000077689 | -4.86 | 1.92E-03 | Gm22499     | snRNA | 2.30 | 2.16 | 2.84 | 2.86 | 2.00 | 2.00 | 2.00 | 2.00 |
| Down | ENSMUSG0000099002 | -2.93 | 1.92E-03 | Gm25053     | snRNA | 2.65 | 2.86 | 2.93 | 2.59 | 2.00 | 2.00 | 2.00 | 2.44 |
| Down | ENSMUSG0000077704 | -4.05 | 2.04E-03 | Snord89     | snRNA | 2.00 | 2.76 | 2.29 | 2.27 | 2.00 | 2.00 | 2.00 | 2.00 |
| Down | ENSMUSG0000099026 | -4.54 | 2.11E-03 | Gm27604     | snRNA | 2.65 | 2.55 | 2.42 | 2.27 | 2.00 | 2.00 | 2.00 | 2.00 |
| Down | ENSMUSG0000098943 | -4.18 | 2.12E-03 | Rnu3b1      | snRNA | 2.85 | 2.16 | 2.15 | 2.27 | 2.00 | 2.00 | 2.00 | 2.00 |
| Down | ENSMUSG0000065295 | -4.18 | 2.13E-03 | Gm23534     | snRNA | 2.16 | 2.66 | 2.29 | 2.00 | 2.00 | 2.00 | 2.00 | 2.00 |
| Down | ENSMUSG0000077767 | -4.58 | 2.29E-03 | Snora35     | snRNA | 2.43 | 2.00 | 2.49 | 3.01 | 2.00 | 2.00 | 2.00 | 2.00 |
| Down | ENSMUSG0000065061 | -3.09 | 2.41E-03 | Gm22884     | snRNA | 2.43 | 2.95 | 2.64 | 2.59 | 2.00 | 2.00 | 2.35 | 2.00 |
| Down | ENSMUSG0000065817 | -4.61 | 2.50E-03 | Gm24698     | snRNA | 2.00 | 2.43 | 2.84 | 2.59 | 2.00 | 2.00 | 2.00 | 2.00 |
| Down | ENSMUSG0000064442 | -3.73 | 2.56E-03 | Gm26225     | snRNA | 2.94 | 2.30 | 2.74 | 2.69 | 2.00 | 2.00 | 2.00 | 2.24 |
| Down | ENSMUSG0000065228 | -3.91 | 2.57E-03 | Gm25789     | snRNA | 2.16 | 3.03 | 2.54 | 3.08 | 2.00 | 2.00 | 2.13 | 2.12 |
| Down | ENSMUSG0000084519 | -3.39 | 2.64E-03 | Gm22478     | snRNA | 2.30 | 2.30 | 3.65 | 3.15 | 2.00 | 2.00 | 2.00 | 2.44 |
| Down | ENSMUSG0000080610 | -4.64 | 2.68E-03 | Snord110    | snRNA | 2.85 | 2.43 | 2.42 | 2.00 | 2.00 | 2.00 | 2.00 | 2.00 |
| Down | ENSMUSG0000065336 | -1.60 | 2.74E-03 | Snora34     | snRNA | 3.10 | 3.19 | 2.93 | 2.69 | 2.00 | 2.70 | 2.24 | 2.54 |
| Down | ENSMUSG0000065818 | -3.92 | 2.76E-03 | Snord35a    | snRNA | 2.43 | 2.76 | 2.54 | 2.27 | 2.00 | 2.00 | 2.00 | 2.00 |
| Down | ENSMUSG0000077734 | -3.89 | 2.81E-03 | Snord83b    | snRNA | 2.00 | 2.43 | 2.42 | 2.38 | 2.00 | 2.00 | 2.00 | 2.00 |
| Down | ENSMUSG0000065757 | -4.41 | 2.82E-03 | Gm23347     | snRNA | 2.75 | 2.30 | 2.00 | 2.59 | 2.00 | 2.00 | 2.00 | 2.00 |
| Down | ENSMUSG0000065728 | -3.89 | 2.91E-03 | Gm26175     | snRNA | 2.16 | 2.55 | 2.15 | 2.38 | 2.00 | 2.00 | 2.00 | 2.00 |
| Down | ENSMUSG0000064994 | -4.29 | 2.99E-03 | Snord73a    | snRNA | 2.43 | 2.16 | 2.42 | 2.59 | 2.00 | 2.00 | 2.00 | 2.00 |
| Down | ENSMUSG0000099427 | -1.33 | 3.22E-03 | Snord116i12 | snRNA | 3.39 | 3.39 | 3.30 | 3.04 | 2.54 | 2.54 | 2.54 | 2.54 |
| Down | ENSMUSG0000065687 | -2.49 | 3.27E-03 | Gm23734     | snRNA | 2.94 | 2.16 | 3.01 | 3.01 | 2.13 | 2.00 | 2.00 | 2.54 |
| Down | ENSMUSG0000070170 | -4.50 | 3.48E-03 | Gm24163     | snRNA | 2.16 | 2.55 | 2.29 | 2.77 | 2.00 | 2.00 | 2.00 | 2.00 |
| Down | ENSMUSG0000080478 | -3.89 | 3.65E-03 | Snord23     | snRNA | 2.30 | 2.43 | 2.29 | 2.27 | 2.00 | 2.00 | 2.00 | 2.00 |
| Down | ENSMUSG0000096496 | -4.15 | 4.32E-03 | Gm25646     | snRNA | 2.43 | 2.30 | 2.00 | 2.69 | 2.00 | 2.00 | 2.00 | 2.00 |
| Down | ENSMUSG0000095868 | -4.27 | 4.62E-03 | Gm23136     | snRNA | 2.16 | 2.00 | 2.64 | 2.89 | 2.00 | 2.00 | 2.00 | 2.00 |
| Down | ENSMUSG0000064450 | -3.66 | 4.85E-03 | Snord68     | snRNA | 2.65 | 2.43 | 2.64 | 2.66 | 2.00 | 2.00 | 2.00 | 2.00 |
| Down | ENSMUSG0000077220 | -3.09 | 5.25E-03 | Snord78     | snRNA | 2.43 | 3.19 | 2.29 | 2.59 | 2.00 | 2.00 | 2.00 | 2.34 |
| Down | ENSMUSG0000088875 | -3.22 | 5.62E-03 | Gm25862     | snRNA | 2.94 | 2.30 | 2.00 | 2.94 | 2.00 | 2.12 | 2.24 | 2.24 |
| Down | ENSMUSG0000093830 | -3.96 | 5.66E-03 | Gm23145     | snRNA | 2.30 | 2.00 | 2.64 | 2.94 | 2.00 | 2.00 | 2.00 | 2.12 |
| Down | ENSMUSG0000077698 | -2.00 | 5.80E-03 | Snord12     | snRNA | 2.30 | 2.66 | 3.16 | 3.15 | 2.00 | 2.00 | 2.13 | 2.44 |
| Down | ENSMUSG0000065735 | -3.71 | 5.83E-03 | Snord80     | snRNA | 2.16 | 2.55 | 2.93 | 2.00 | 2.00 | 2.00 | 2.13 | 2.00 |
| Down | ENSMUSG0000080542 | -3.88 | 6.12E-03 | Gm29617     | snRNA | 2.43 | 2.30 | 2.00 | 2.49 | 2.00 | 2.00 | 2.00 | 2.00 |
| Down | ENSMUSG0000065693 | -3.16 | 6.59E-03 | Gm22579     | snRNA | 2.94 | 2.66 | 2.54 | 2.59 | 2.00 | 2.00 | 2.34 | 2.34 |
| Down | ENSMUSG0000077578 | -4.63 | 6.74E-03 | Gm25631     | snRNA | 2.65 | 2.43 | 2.54 | 2.38 | 2.00 | 2.00 | 2.00 | 2.00 |
| Down | ENSMUSG0000064440 | -3.44 | 7.03E-03 | Gm26224     | snRNA | 2.54 | 2.76 | 2.29 | 2.69 | 2.00 | 2.00 | 2.24 | 2.24 |
| Up   | ENSMUSG0000093443 | 1.37  | 7.13E-03 | Gm22871     | snRNA | 3.02 | 3.26 | 3.43 | 3.21 | 4.10 | 3.33 | 4.65 | 4.31 |
| Down | ENSMUSG0000065378 | -4.38 | 8.30E-03 | Gm22744     | snRNA | 2.30 | 2.30 | 2.15 | 2.86 | 2.00 | 2.00 | 2.00 | 2.00 |
| Down | ENSMUSG0000088372 | -4.52 | 8.33E-03 | Gm22881     | snRNA | 2.85 | 2.30 | 2.00 | 2.59 | 2.00 | 2.00 | 2.00 | 2.00 |
| Down | ENSMUSG0000065219 | -2.94 | 8.37E-03 | Snord32a    | snRNA | 2.43 | 2.66 | 2.64 | 2.69 | 2.13 | 2.12 | 2.13 | 2.00 |
| Down | ENSMUSG0000080518 | -3.94 | 8.88E-03 | Gm22193     | snRNA | 2.54 | 2.76 | 2.64 | 2.00 | 2.00 | 2.00 | 2.00 | 2.12 |
| Down | ENSMUSG0000064811 | -3.90 | 9.68E-03 | Gm22358     | snRNA | 2.00 | 2.66 | 2.29 | 2.27 | 2.00 | 2.00 | 2.00 | 2.00 |
| Down | ENSMUSG0000096243 | -6.20 | 1.19E-04 | Gm24265     | snRNA | 8.04 | 7.84 | 7.52 | 7.44 | 2.90 | 2.44 | 2.79 | 2.92 |
| Down | ENSMUSG0000096349 | -5.43 | 6.93E-03 | Gm22513     | snRNA | 9.06 | 8.65 | 4.13 | 8.55 | 3.83 | 3.83 | 4.05 | 3.83 |
| Down | ENSMUSG0000094377 | -7.37 | 9.95E-03 | Gm24407     | snRNA | 7.81 | 7.61 | 7.49 | 7.00 | 2.34 | 2.24 | 2.24 | 2.24 |
| Down | ENSMUSG0000080542 | -3.72 | 2.20E-12 | Gm22710     | snRNA | 4.26 | 4.56 | 4.37 | 4.67 | 2.97 | 2.12 | 2.24 | 2.24 |
| Down | ENSMUSG0000096455 | -4.25 | 2.20E-12 | Gm25360     | snRNA | 4.03 | 4.17 | 3.97 | 4.30 | 2.13 | 2.13 | 2.24 | 2.24 |
| Down | ENSMUSG0000095590 | -7.18 | 7.02E-11 | Gm24305     | snRNA | 3.67 | 3.46 | 4.09 | 3.82 | 2.00 | 2.00 | 2.00 | 2.00 |
| Down | ENSMUSG0000093843 | -6.97 | 1.84E-10 | Gm25939     | snRNA | 4.65 | 4.82 | 4.93 | 4.60 | 2.00 | 2.00 | 2.24 | 2.00 |
| Down | ENSMUSG0000080538 | -6.65 | 7.97E-09 | Gm25541     | snRNA | 3.77 | 4.05 | 3.65 | 4.15 | 2.13 | 2.00 | 2.00 | 2.00 |
| Down | ENSMUSG0000077323 | -3.98 | 5.87E-07 | Rnu11       | snRNA | 3.99 | 3.26 | 3.89 | 4.42 | 2.70 | 2.00 | 2.00 | 2.00 |
| Down | ENSMUSG0000065176 | -4.44 | 2.84E-06 | Rnu12       | snRNA | 4.45 | 3.97 | 3.84 | 3.69 | 2.66 | 2.00 | 2.00 | 2.00 |
| Down | ENSMUSG0000088549 | -5.15 | 4.88E-05 | Gm24959     | snRNA | 2.65 | 2.43 | 2.15 | 3.21 | 2.00 | 2.00 | 2.00 | 2.00 |
| Down | ENSMUSG0000088378 | -3.70 | 8.33E-05 | Gm25184     | snRNA | 2.43 | 3.63 | 3.80 | 3.01 | 2.00 | 2.44 | 2.00 | 2.12 |
| Down | ENSMUSG0000065627 | -4.73 | 1.07E-04 | Gm24803     | snRNA | 2.65 | 2.95 | 2.00 | 2.38 | 2.00 | 2.00 | 2.00 | 2.00 |
| Down | ENSMUSG0000095676 | -4.41 | 1.39E-04 | Gm25099     | snRNA | 3.50 | 2.66 | 2.64 | 2.94 | 2.25 | 2.00 | 2.00 | 2.00 |
| Down | ENSMUSG0000065251 | -4.53 | 1.68E-04 | Gm23971     | snRNA | 2.43 | 2.16 | 2.74 | 2.49 | 2.00 | 2.00 | 2.00 | 2.00 |
| Down | ENSMUSG0000088951 | -5.71 | 1.71E-04 | Gm24940     | snRNA | 3.10 | 2.55 | 2.93 | 3.01 | 2.00 | 2.00 | 2.00 | 2.00 |
| Down | ENSMUSG0000075833 | -4.62 | 1.79E-04 | Gm22003     | snRNA | 2.43 | 2.43 | 2.64 | 3.27 | 2.00 | 2.00 | 2.00 | 2.00 |
| Down | ENSMUSG0000096391 | -4.53 | 2.28E-04 | Gm23686     | snRNA | 2.54 | 2.16 | 2.84 | 2.27 | 2.00 | 2.00 | 2.00 | 2.00 |
| Down | ENSMUSG0000094772 | -4.52 | 2.54E-04 | Gm25202     | snRNA | 2.16 | 2.43 | 2.74 | 2.49 | 2.00 | 2.00 | 2.00 | 2.00 |
| Down | ENSMUSG0000088783 | -3.8  |          |             |       |      |      |      |      |      |      |      |      |

|      |                     |       |           |               |       |       |       |       |       |       |       |       |       |
|------|---------------------|-------|-----------|---------------|-------|-------|-------|-------|-------|-------|-------|-------|-------|
| Down | ENSMUSG00000084497  | -4.85 | 5.74E-04  | Gm22107       | snRNA | 2.54  | 2.16  | 2.29  | 3.08  | 2.00  | 2.00  | 2.00  | 2.00  |
| Down | ENSMUSG00000089199  | -3.55 | 5.75E-04  | Gm25772       | snRNA | 2.85  | 2.76  | 2.84  | 2.94  | 2.00  | 2.00  | 2.00  | 2.34  |
| Down | ENSMUSG00000093964  | -4.65 | 5.84E-04  | Gm22633       | snRNA | 2.54  | 2.95  | 2.29  | 2.14  | 2.00  | 2.00  | 2.00  | 2.00  |
| Down | ENSMUSG00000094668  | -4.09 | 6.67E-04  | Gm24871       | snRNA | 2.65  | 2.43  | 2.64  | 2.49  | 2.00  | 2.00  | 2.00  | 2.12  |
| Down | ENSMUSG00000094976  | -4.29 | 7.45E-04  | Gm25257       | snRNA | 2.65  | 2.40  | 2.15  | 2.00  | 2.00  | 2.00  | 2.00  | 2.00  |
| Down | ENSMUSG00000095399  | -4.18 | 8.24E-04  | Gm24414       | snRNA | 2.43  | 2.30  | 2.54  | 2.27  | 2.00  | 2.00  | 2.00  | 2.00  |
| Down | ENSMUSG00000096479  | -4.43 | 1.02E-03  | Gm25020       | snRNA | 2.54  | 2.43  | 2.29  | 2.49  | 2.00  | 2.00  | 2.00  | 2.00  |
| Down | ENSMUSG00000096474  | -4.64 | 1.04E-03  | Gm23517       | snRNA | 2.00  | 2.66  | 3.01  | 2.14  | 2.00  | 2.00  | 2.00  | 2.00  |
| Down | ENSMUSG00000096482  | -4.04 | 1.19E-03  | Gm25813       | snRNA | 2.43  | 2.43  | 2.42  | 2.14  | 2.00  | 2.00  | 2.00  | 2.00  |
| Down | ENSMUSG00000096486  | -4.04 | 1.36E-03  | Gm23444       | snRNA | 2.65  | 2.16  | 2.00  | 2.49  | 2.00  | 2.00  | 2.00  | 2.00  |
| Down | ENSMUSG00000098292  | -4.52 | 1.41E-03  | Gm23209       | snRNA | 2.00  | 2.55  | 2.74  | 2.49  | 2.00  | 2.00  | 2.00  | 2.00  |
| Down | ENSMUSG000000964982 | -4.44 | 1.51E-03  | Gm25259       | snRNA | 2.16  | 2.66  | 2.74  | 2.14  | 2.00  | 2.00  | 2.00  | 2.00  |
| Down | ENSMUSG00000093956  | -2.80 | 1.88E-03  | Gm24497       | snRNA | 3.18  | 2.43  | 2.64  | 3.39  | 2.13  | 2.53  | 2.00  | 2.00  |
| Down | ENSMUSG000000964689 | -3.89 | 2.29E-03  | Gm25815       | snRNA | 2.16  | 2.16  | 2.64  | 2.27  | 2.00  | 2.00  | 2.00  | 2.00  |
| Down | ENSMUSG00000093074  | -3.21 | 2.82E-03  | Gm25949       | snRNA | 3.18  | 3.03  | 3.49  | 2.94  | 2.00  | 2.62  | 2.00  | 2.00  |
| Down | ENSMUSG00000096341  | -4.05 | 2.86E-03  | Gm22886       | snRNA | 2.30  | 2.30  | 2.64  | 2.14  | 2.00  | 2.00  | 2.00  | 2.00  |
| Down | ENSMUSG00000096205  | -2.57 | 3.39E-03  | Gm22068       | snRNA | 3.10  | 3.03  | 3.54  | 2.94  | 2.00  | 2.00  | 2.00  | 2.00  |
| Down | ENSMUSG000000964941 | -3.72 | 3.73E-03  | Gm23238       | snRNA | 2.30  | 2.30  | 2.00  | 2.49  | 2.00  | 2.00  | 2.00  | 2.00  |
| Down | ENSMUSG00000090384  | -3.50 | 4.04E-03  | Gm22105       | snRNA | 3.18  | 2.30  | 2.93  | 2.77  | 2.13  | 2.00  | 2.00  | 2.24  |
| Down | ENSMUSG00000097947  | -4.05 | 4.24E-03  | Gm24249       | snRNA | 2.30  | 2.00  | 2.93  | 2.00  | 2.00  | 2.00  | 2.00  | 2.00  |
| Down | ENSMUSG000000964653 | -3.87 | 4.51E-03  | Gm26129       | snRNA | 2.30  | 2.16  | 2.15  | 2.59  | 2.00  | 2.00  | 2.00  | 2.00  |
| Down | ENSMUSG00000095961  | -3.56 | 4.72E-03  | Gm24967       | snRNA | 3.02  | 2.55  | 2.93  | 2.86  | 2.00  | 2.24  | 2.00  | 2.12  |
| Down | ENSMUSG00000095982  | -4.37 | 4.87E-03  | Rnu5g         | snRNA | 2.16  | 2.30  | 2.15  | 2.94  | 2.00  | 2.00  | 2.00  | 2.00  |
| Down | ENSMUSG00000095738  | -3.71 | 4.92E-03  | Gm25313       | snRNA | 2.16  | 2.00  | 2.29  | 2.59  | 2.00  | 2.00  | 2.00  | 2.00  |
| Down | ENSMUSG00000075864  | -4.43 | 5.00E-03  | Gm26002       | snRNA | 2.00  | 2.76  | 2.64  | 2.27  | 2.00  | 2.00  | 2.00  | 2.00  |
| Down | ENSMUSG000000965191 | -4.22 | 5.07E-03  | Gm23458       | snRNA | 2.00  | 2.76  | 2.42  | 3.01  | 2.00  | 2.00  | 2.00  | 2.12  |
| Down | ENSMUSG00000088119  | -2.12 | 6.78E-03  | Gm24060       | snRNA | 2.54  | 2.43  | 3.80  | 3.27  | 2.00  | 2.70  | 2.00  | 2.54  |
| Up   | ENSMUSG000000965819 | 3.85  | 7.38E-03  | Gm24693       | snRNA | 2.00  | 2.00  | 2.00  | 2.00  | 2.25  | 2.92  | 2.00  | 2.12  |
| Down | ENSMUSG000000964851 | -3.52 | 7.43E-03  | Gm24525       | snRNA | 2.16  | 2.16  | 2.15  | 2.49  | 2.00  | 2.00  | 2.00  | 2.00  |
| Down | ENSMUSG000000965049 | -4.62 | 7.57E-03  | Gm24041       | snRNA | 2.00  | 2.86  | 2.42  | 2.59  | 2.00  | 2.00  | 2.00  | 2.00  |
| Down | ENSMUSG000000965347 | -4.51 | 7.61E-03  | Gm25583       | snRNA | 2.65  | 2.30  | 2.15  | 2.89  | 2.00  | 2.00  | 2.00  | 2.00  |
| Down | ENSMUSG000000964494 | -4.45 | 7.68E-03  | Gm22063       | snRNA | 2.00  | 2.86  | 2.93  | 2.00  | 2.12  | 2.00  | 2.00  | 2.00  |
| Down | ENSMUSG000000964632 | -4.09 | 7.69E-03  | Gm23987       | snRNA | 2.16  | 2.30  | 2.00  | 2.77  | 2.00  | 2.00  | 2.00  | 2.00  |
| Down | ENSMUSG00000094726  | -3.72 | 7.77E-03  | Gm23525       | snRNA | 2.94  | 2.43  | 2.43  | 2.13  | 2.00  | 2.00  | 2.00  | 2.00  |
| Down | ENSMUSG00000094306  | -3.32 | 9.10E-03  | Gm24924       | snRNA | 2.54  | 2.55  | 2.29  | 2.00  | 2.00  | 2.00  | 2.00  | 2.12  |
| Down | ENSMUSG00000094710  | -4.10 | 9.27E-03  | Gm22823       | snRNA | 2.54  | 2.55  | 2.54  | 2.38  | 2.00  | 2.00  | 2.00  | 2.12  |
| Down | ENSMUSG00000087951  | -4.29 | 9.52E-03  | Gm22558       | snRNA | 2.00  | 2.00  | 3.01  | 2.38  | 2.00  | 2.00  | 2.00  | 2.00  |
| Up   | ENSMUSG00000098657  | 1.48  | 2.93E-05  | Gm27675       | snRNA | 3.44  | 4.17  | 3.43  | 4.72  | 4.47  | 5.33  | 4.90  | 5.51  |
| Down | ENSMUSG00000102900  | -3.66 | 6.36E-283 | Gm37811       | TEC   | 9.15  | 9.07  | 9.10  | 8.95  | 5.72  | 5.50  | 5.38  | 5.51  |
| Down | ENSMUSG00000102349  | -4.26 | 1.89E-183 | Gm37376       | TEC   | 14.90 | 14.50 | 14.37 | 14.75 | 10.65 | 10.15 | 10.60 | 10.60 |
| Up   | ENSMUSG00000102796  | 2.91  | 1.17E-59  | Gm37711       | TEC   | 5.15  | 5.31  | 5.55  | 5.48  | 8.18  | 8.32  | 7.99  | 8.14  |
| Down | ENSMUSG00000104459  | -3.61 | 4.33E-59  | Gm37824       | TEC   | 7.53  | 7.37  | 7.48  | 3.17  | 4.47  | 4.47  | 4.75  | 4.75  |
| Up   | ENSMUSG000000966752 | 2.01  | 4.43E-58  | Gm10176       | TEC   | 6.33  | 6.28  | 6.06  | 5.82  | 8.12  | 7.95  | 8.20  | 8.04  |
| Up   | ENSMUSG00000110711  | 1.57  | 1.29E-43  | Gm45760       | TEC   | 7.21  | 7.46  | 7.25  | 7.24  | 8.80  | 8.65  | 9.08  | 8.76  |
| Down | ENSMUSG00000115685  | -1.88 | 7.78E-39  | D730044K07Rik | TEC   | 8.95  | 8.88  | 8.81  | 8.83  | 6.82  | 6.82  | 7.08  | 6.96  |
| Down | ENSMUSG00000110249  | -2.13 | 1.68E-32  | 9330121K16Rik | TEC   | 7.17  | 7.29  | 7.02  | 7.17  | 4.56  | 5.41  | 5.49  | 5.02  |
| Up   | ENSMUSG00000113494  | 1.14  | 2.49E-31  | Gm49759       | TEC   | 8.47  | 8.38  | 8.58  | 8.58  | 9.63  | 9.63  | 9.28  | 9.28  |
| Down | ENSMUSG00000102615  | -1.27 | 1.61E-30  | Gm37844       | TEC   | 8.32  | 8.20  | 8.45  | 8.28  | 6.69  | 7.25  | 7.21  | 7.07  |
| Down | ENSMUSG00000110350  | -1.80 | 3.77E-30  | Gm10252       | TEC   | 8.48  | 8.19  | 8.55  | 8.44  | 6.72  | 7.05  | 6.23  | 6.52  |
| Up   | ENSMUSG00000103136  | 1.33  | 1.08E-29  | Gm37980       | TEC   | 6.13  | 6.03  | 6.18  | 5.95  | 7.42  | 7.28  | 7.28  | 7.42  |
| Down | ENSMUSG00000104868  | -1.90 | 7.26E-29  | Gm9954        | TEC   | 6.84  | 6.89  | 6.99  | 7.16  | 4.72  | 5.38  | 5.14  | 5.43  |
| Down | ENSMUSG00000102555  | -2.91 | 2.02E-27  | 6430511E19Rik | TEC   | 5.23  | 5.44  | 5.26  | 5.11  | 2.90  | 3.22  | 3.07  | 3.17  |
| Up   | ENSMUSG00000103001  | 1.15  | 1.33E-24  | A930005N03Rik | TEC   | 7.01  | 6.79  | 6.83  | 7.12  | 8.19  | 7.99  | 7.86  | 8.20  |
| Down | ENSMUSG00000102657  | -2.91 | 1.00E-23  | Gm37899       | TEC   | 5.39  | 4.91  | 4.82  | 4.96  | 2.57  | 2.70  | 3.07  | 3.70  |
| Down | ENSMUSG00000106826  | -3.66 | 3.94E-23  | Gm42583       | TEC   | 4.87  | 4.82  | 5.00  | 4.82  | 2.00  | 2.00  | 2.00  | 2.70  |
| Down | ENSMUSG00000108443  | -4.52 | 5.21E-22  | Gm44510       | TEC   | 4.42  | 5.15  | 5.37  | 4.74  | 2.00  | 2.13  | 3.06  | 3.06  |
| Down | ENSMUSG00000108912  | -3.45 | 1.56E-21  | E230020D15Rik | TEC   | 4.57  | 4.86  | 5.13  | 4.80  | 2.13  | 2.00  | 3.40  | 2.62  |
| Up   | ENSMUSG00000094868  | 2.48  | 6.24E-20  | Dlx6os2       | TEC   | 4.26  | 4.27  | 4.09  | 4.55  | 6.91  | 6.49  | 6.61  | 6.51  |
| Down | ENSMUSG00000106320  | -3.38 | 1.14E-19  | Gm42992       | TEC   | 5.04  | 4.31  | 5.07  | 4.42  | 2.24  | 2.00  | 3.17  | 3.17  |
| Down | ENSMUSG00000102465  | -4.07 | 1.49E-19  | Gm38198       | TEC   | 4.80  | 4.79  | 4.49  | 4.58  | 2.00  | 2.34  | 2.00  | 2.99  |
| Up   | ENSMUSG00000113589  | 1.09  | 5.22E-19  | Gm48374       | TEC   | 6.29  | 6.20  | 6.18  | 7.41  | 6.07  | 7.14  | 7.19  | 7.18  |
| Down | ENSMUSG00000103146  | -3.15 | 1.42E-18  | Gm37745       | TEC   | 4.15  | 4.89  | 4.60  | 4.67  | 2.90  | 2.85  | 2.13  | 2.62  |
| Down | ENSMUSG00000104132  | -3.29 | 2.64E-18  | Gm36952       | TEC   | 4.48  | 5.10  | 4.97  | 4.39  | 2.00  | 3.28  | 2.79  | 2.24  |
| Down | ENSMUSG00000104443  | -1.53 | 3.79E-18  | 4932442E05Rik | TEC   | 6.35  | 6.61  | 6.37  | 5.09  | 5.24  | 5.14  | 4.75  | 4.75  |
| Down | ENSMUSG00000105449  | -2.79 | 4.61E-18  | Gm43379       | TEC   | 5.34  | 5.88  | 6.16  | 5.88  | 3.04  | 4.16  | 3.19  | 3.53  |
| Down | ENSMUSG00000104118  | -4.04 | 6.82E-18  | Gm37298       | TEC   | 4.07  | 5.04  | 4.54  | 4.76  | 2.00  | 2.12  | 2.00  | 3.12  |
| Down | ENSMUSG00000107320  | -2.46 | 1.58E-17  | Gm42549       | TEC   | 4.87  | 4.84  | 5.09  | 5.04  | 3.29  | 3.61  | 2.00  | 3.29  |
| Down | ENSMUSG00000109498  | -3.72 | 1.91E-17  | Gm45222       | TEC   | 4.36  | 4.89  | 4.91  | 4.55  | 3.17  | 2.12  | 2.24  | 2.24  |
| Up   | ENSMUSG00000113662  | 1.08  | 2.33E-17  | Gm35558       | TEC   | 6.94  | 6.80  | 6.67  | 6.75  | 7.84  | 7.71  | 8.03  | 8.00  |
| Down | ENSMUSG00000105985  | -2.81 | 2.41E-17  | Gm42993       | TEC   | 4.22  | 5.00  | 4.93  | 4.63  | 3.38  | 2.63  | 2.63  | 2.63  |
| Up   | ENSMUSG00000107331  | 1.03  | 3.06E-17  | Gm42732       | TEC   | 7.63  | 7.47  | 7.48  | 7.37  | 8.48  | 8.66  | 8.41  | 8.46  |
| Down | ENSMUSG00000104030  | -4.58 | 1.29E-16  | 5330406M23Rik | TEC   | 4.59  | 4.67  | 4.17  | 4.25  | 2.37  | 2.34  | 2.00  | 2.24  |
| Down | ENSMUSG000001124501 | -2.48 | 1.49E-16  | Gm48582       | TEC   | 4.36  | 4.74  | 5.11  | 3.17  | 3.22  | 3.17  | 3.24  | 3.23  |
| Down | ENSMUSG00000101823  | -3.84 | 1.67E-16  | Gm29438       | TEC   | 4.29  | 4.20  | 4.40  | 2.25  | 2.00  | 2.37  | 2.35  | 2.85  |
| Down | ENSMUSG00000111212  | -3.67 | 2.08E-16  | Gm47087       | TEC   | 4.67  | 4.01  | 4.43  | 4.50  | 2.00  | 2.78  | 2.00  | 2.70  |
| Down | ENSMUSG00000103697  | -1.92 | 2.69E-16  | Gm38020       | TEC   | 5.21  | 5.78  | 6.28  | 6.35  | 4.03  | 3.73  | 4.61  | 4.59  |
| Down | ENSMUSG00000108890  | -2.95 | 3.11E-16  | Gm44847       | TEC   | 4.18  | 4.44  | 4.34  | 4.19  | 2.82  | 2.92  | 2.00  | 2.44  |
| Down | ENSMUSG00000107118  | -4.18 | 8.80E-16  | Gm42986       | TEC   | 4.22  | 4.72  | 4.40  | 4.05  | 2.66  | 2.00  | 2.00  | 2.44  |
| Down | ENSMUSG00000109239  | -3.40 | 1.44E-15  | Gm45176       | TEC   | 4.45  | 4.24  | 4.34  | 4.37  | 2.00  | 2.62  | 2.79  | 2.34  |
| Down | ENSMUSG00000105771  | -3.14 | 6.49E-15  | 2900064K03Rik | TEC   | 4.03  | 4.64  | 4.52  | 4.31  | 3.23  | 2.34  | 2.45  | 2.00  |
| Down | ENSMUSG00000103924  | -3.30 | 2.03E-14  | Gm37895       | TEC   | 4.29  | 4.82  | 4.27  | 4.39  | 2.13  | 3.28  | 2.00  | 2.34  |
| Down | ENSMUSG00000102451  | -2.14 | 2.90E-14  | Gm37655       | TEC   | 5.62  | 5.53  | 5.50  | 5.59  | 2.57  | 3.98  | 3.83  | 4.25  |
| Down | ENSMUSG00000103696  | -2.54 | 3.31E-14  | Gm37531       | TEC   | 4.18  | 4.44  | 4.20  | 4.55  | 2.90  | 2.45  | 2.45  | 2.99  |
| Down | ENSMUSG00000103563  | -3.06 | 8.43E-14  | 8030445P17Rik | TEC   | 3.95  | 4.89  | 4.49  | 4.25  | 2.66  | 2.44  | 2.00  | 3.12  |
| Down | ENSMUSG00000105293  | -3.03 | 9.22E-14  | Gm42843       | TEC   | 4.26  | 4.17  | 4.49  | 4.02  | 2.00  | 2.92  | 2.00  | 2.92  |
| Down | ENSMUSG00000111496  | -2.13 | 9.55E-14  | Gm47483       | TEC   | 4.57  | 5.06  | 5.09  | 4.76  | 2.57  | 3.73  |       |       |

|      |                    |       |          |               |     |      |      |      |      |      |      |      |      |
|------|--------------------|-------|----------|---------------|-----|------|------|------|------|------|------|------|------|
| Down | ENSMUSG00000104503 | -2.77 | 3.03E-13 | Gm37738       | TEC | 4.48 | 4.31 | 4.52 | 4.53 | 2.00 | 2.78 | 2.63 | 3.23 |
| Down | ENSMUSG00000116809 | -4.09 | 3.13E-13 | A630036G19Rik | TEC | 4.15 | 3.73 | 4.49 | 4.60 | 2.00 | 2.12 | 2.00 | 2.85 |
| Down | ENSMUSG00000114282 | -3.15 | 3.74E-13 | 5330431K02Rik | TEC | 3.56 | 3.63 | 4.49 | 4.39 | 2.00 | 2.00 | 2.00 | 2.85 |
| Down | ENSMUSG00000108394 | -2.74 | 4.91E-13 | Gm45477       | TEC | 3.81 | 4.44 | 4.60 | 4.12 | 2.57 | 2.62 | 2.63 | 2.78 |
| Down | ENSMUSG00000112601 | -3.09 | 5.44E-13 | Gm47590       | TEC | 3.67 | 4.20 | 4.78 | 4.05 | 2.00 | 2.70 | 2.00 | 3.06 |
| Down | ENSMUSG00000109429 | -2.27 | 7.92E-13 | Gm45223       | TEC | 4.87 | 4.72 | 4.30 | 4.65 | 2.37 | 2.98 | 3.63 | 2.99 |
| Down | ENSMUSG00000103064 | -3.77 | 1.04E-12 | Gm37558       | TEC | 4.15 | 4.53 | 4.20 | 4.55 | 2.00 | 2.70 | 2.00 | 2.44 |
| Down | ENSMUSG00000107197 | -3.24 | 1.13E-12 | Gm45312       | TEC | 3.81 | 4.20 | 4.37 | 3.55 | 2.66 | 2.44 | 2.00 | 2.44 |
| Down | ENSMUSG00000115276 | -3.80 | 1.30E-12 | 9930017N22Rik | TEC | 3.31 | 4.27 | 4.49 | 3.94 | 2.13 | 2.00 | 2.00 | 2.85 |
| Down | ENSMUSG00000103183 | -3.42 | 2.10E-12 | Gm37090       | TEC | 3.56 | 4.41 | 3.93 | 4.22 | 2.00 | 2.85 | 2.00 | 2.44 |
| Down | ENSMUSG00000108168 | -3.74 | 2.14E-12 | Gm43864       | TEC | 4.87 | 4.01 | 4.30 | 3.90 | 2.90 | 2.00 | 2.24 | 2.24 |
| Down | ENSMUSG00000115275 | -2.78 | 2.23E-12 | 9630050E16Rik | TEC | 4.11 | 4.84 | 4.73 | 4.70 | 2.00 | 3.33 | 2.24 | 3.17 |
| Down | ENSMUSG00000116867 | -5.05 | 2.57E-12 | Gm49677       | TEC | 4.18 | 4.41 | 4.40 | 4.02 | 2.13 | 2.24 | 2.00 | 2.24 |
| Down | ENSMUSG00000111910 | -2.67 | 2.59E-12 | Gm47472       | TEC | 3.56 | 3.88 | 4.65 | 4.31 | 2.25 | 2.85 | 2.63 | 2.70 |
| Down | ENSMUSG00000108521 | -4.28 | 3.35E-12 | Gm44639       | TEC | 3.99 | 3.83 | 3.75 | 4.45 | 2.00 | 2.44 | 2.00 | 2.34 |
| Down | ENSMUSG00000105601 | -2.46 | 3.67E-12 | Gm42725       | TEC | 3.91 | 4.50 | 4.49 | 4.60 | 2.82 | 2.62 | 2.93 | 2.92 |
| Down | ENSMUSG00000109812 | -1.27 | 4.89E-12 | Gm45640       | TEC | 6.76 | 6.13 | 6.39 | 5.92 | 5.30 | 5.21 | 5.07 | 5.06 |
| Down | ENSMUSG00000102662 | -3.21 | 5.38E-12 | Gm38377       | TEC | 4.15 | 3.68 | 4.09 | 3.98 | 2.00 | 2.24 | 2.94 | 2.94 |
| Down | ENSMUSG00000108812 | -3.32 | 8.27E-12 | C130063A15Rik | TEC | 4.03 | 4.13 | 4.13 | 4.28 | 2.74 | 2.00 | 2.54 | 2.34 |
| Down | ENSMUSG00000102498 | -2.18 | 8.77E-12 | Gm19445       | TEC | 3.91 | 4.64 | 4.65 | 4.12 | 2.74 | 3.05 | 3.07 | 2.85 |
| Down | ENSMUSG00000103851 | -2.63 | 1.32E-11 | Gm37606       | TEC | 3.99 | 4.47 | 4.27 | 4.57 | 2.44 | 2.57 | 2.93 | 2.85 |
| Down | ENSMUSG00000103869 | -3.70 | 1.36E-11 | Gm37420       | TEC | 4.11 | 4.13 | 3.70 | 3.98 | 2.37 | 2.00 | 2.00 | 2.70 |
| Down | ENSMUSG00000102747 | -2.98 | 1.80E-11 | Gm37602       | TEC | 3.72 | 4.82 | 4.09 | 4.19 | 2.00 | 3.22 | 2.24 | 2.44 |
| Down | ENSMUSG00000102461 | -2.89 | 2.08E-11 | Gm37166       | TEC | 3.72 | 4.47 | 3.43 | 4.02 | 2.13 | 2.53 | 2.35 | 2.78 |
| Down | ENSMUSG00000109539 | -2.25 | 2.37E-11 | Gm44667       | TEC | 3.67 | 4.05 | 4.24 | 4.65 | 2.82 | 2.24 | 3.07 | 2.99 |
| Down | ENSMUSG00000102776 | -1.88 | 2.39E-11 | Gm38162       | TEC | 5.58 | 5.25 | 5.60 | 5.64 | 4.61 | 3.77 | 3.13 | 3.92 |
| Down | ENSMUSG00000115471 | -4.03 | 2.81E-11 | C230086J09Rik | TEC | 3.56 | 4.17 | 4.13 | 4.05 | 2.37 | 2.12 | 2.35 | 2.12 |
| Down | ENSMUSG00000110342 | -4.00 | 2.98E-11 | Gm45263       | TEC | 3.95 | 3.88 | 3.54 | 4.72 | 2.00 | 2.70 | 2.00 | 2.24 |
| Up   | ENSMUSG00000074355 | 1.04  | 3.95E-11 | Gm10676       | TEC | 6.86 | 6.52 | 6.72 | 6.81 | 7.78 | 7.65 | 7.87 | 7.69 |
| Down | ENSMUSG00000108070 | -3.62 | 4.04E-11 | Gm43872       | TEC | 4.03 | 4.17 | 3.93 | 3.98 | 2.13 | 2.53 | 2.00 | 2.54 |
| Down | ENSMUSG00000106959 | -3.16 | 4.28E-11 | Gm42548       | TEC | 3.38 | 4.64 | 4.30 | 4.31 | 2.66 | 2.12 | 2.24 | 2.85 |
| Down | ENSMUSG00000109320 | -3.10 | 4.85E-11 | Gm44679       | TEC | 4.36 | 3.63 | 4.09 | 3.74 | 2.47 | 2.00 | 3.00 | 2.00 |
| Down | ENSMUSG00000106940 | -2.82 | 4.86E-11 | Gm42600       | TEC | 3.61 | 3.97 | 4.17 | 4.25 | 2.00 | 2.24 | 3.00 | 2.23 |
| Up   | ENSMUSG00000107134 | 1.48  | 5.10E-11 | Gm42528       | TEC | 5.48 | 5.33 | 5.33 | 6.92 | 5.25 | 7.12 | 6.67 | 6.67 |
| Down | ENSMUSG00000105358 | -2.33 | 6.44E-11 | Gm43099       | TEC | 3.91 | 4.64 | 4.46 | 5.04 | 3.40 | 3.33 | 2.00 | 2.85 |
| Down | ENSMUSG00000102194 | -4.28 | 7.23E-11 | Gm38169       | TEC | 3.31 | 4.34 | 3.89 | 4.37 | 2.00 | 2.24 | 2.00 | 2.54 |
| Down | ENSMUSG00000104344 | -1.78 | 7.39E-11 | Gm38077       | TEC | 4.77 | 5.43 | 5.35 | 5.12 | 3.23 | 3.73 | 3.13 | 4.48 |
| Down | ENSMUSG00000103572 | -3.61 | 7.40E-11 | Gm37115       | TEC | 3.81 | 3.57 | 4.24 | 4.85 | 2.00 | 2.86 | 2.44 | 2.44 |
| Down | ENSMUSG00000110047 | -3.81 | 7.66E-11 | A230085B16Rik | TEC | 3.72 | 4.01 | 4.17 | 4.31 | 2.00 | 2.00 | 2.35 | 2.70 |
| Down | ENSMUSG00000106612 | -3.78 | 8.03E-11 | Gm43750       | TEC | 3.61 | 3.97 | 3.75 | 3.90 | 2.00 | 2.12 | 2.13 | 2.62 |
| Down | ENSMUSG00000112947 | -2.25 | 1.01E-10 | Gm47493       | TEC | 4.39 | 3.83 | 4.17 | 4.45 | 2.82 | 2.78 | 2.86 | 2.85 |
| Down | ENSMUSG00000104235 | -2.71 | 1.22E-10 | Gm37589       | TEC | 3.77 | 3.78 | 4.27 | 4.45 | 2.00 | 2.13 | 2.85 | 2.13 |
| Down | ENSMUSG00000102212 | -2.55 | 1.36E-10 | C230085N15Rik | TEC | 4.51 | 4.17 | 4.17 | 4.37 | 2.37 | 3.38 | 2.00 | 2.85 |
| Down | ENSMUSG00000108042 | -2.15 | 1.39E-10 | B130021K23Rik | TEC | 4.39 | 4.56 | 4.57 | 4.02 | 2.90 | 2.53 | 3.30 | 3.06 |
| Down | ENSMUSG00000102290 | -3.42 | 1.42E-10 | Gm38260       | TEC | 3.72 | 3.88 | 3.93 | 3.98 | 2.00 | 2.53 | 2.13 | 2.54 |
| Down | ENSMUSG00000102516 | -4.01 | 1.62E-10 | Gm38340       | TEC | 4.11 | 3.63 | 3.75 | 4.19 | 2.37 | 2.00 | 2.00 | 2.54 |
| Down | ENSMUSG00000107227 | -2.69 | 1.62E-10 | Gm44090       | TEC | 3.62 | 3.97 | 4.75 | 3.82 | 2.57 | 2.71 | 2.54 | 2.44 |
| Down | ENSMUSG00000106815 | -7.02 | 1.84E-10 | Gm43658       | TEC | 3.31 | 3.92 | 3.75 | 3.65 | 2.00 | 2.00 | 2.00 | 2.00 |
| Down | ENSMUSG00000112358 | -2.34 | 1.91E-10 | Gm33869       | TEC | 4.87 | 3.97 | 4.87 | 4.82 | 2.00 | 2.98 | 2.71 | 2.85 |
| Down | ENSMUSG00000103427 | -2.16 | 2.21E-10 | Gm37534       | TEC | 4.18 | 4.17 | 4.82 | 4.12 | 3.45 | 2.34 | 2.54 | 3.17 |
| Down | ENSMUSG00000105071 | -3.48 | 2.41E-10 | Gm43336       | TEC | 3.61 | 3.83 | 3.84 | 3.98 | 2.25 | 2.00 | 2.00 | 2.78 |
| Down | ENSMUSG00000107019 | -1.67 | 2.63E-10 | Gm43682       | TEC | 5.28 | 5.35 | 5.73 | 5.59 | 3.45 | 4.16 | 4.63 | 3.81 |
| Down | ENSMUSG00000105748 | -3.25 | 3.10E-10 | Gm43088       | TEC | 3.77 | 3.39 | 4.24 | 4.42 | 2.00 | 2.00 | 2.79 | 2.62 |
| Down | ENSMUSG00000105970 | -3.52 | 3.48E-10 | Gm43360       | TEC | 3.67 | 3.88 | 3.65 | 3.78 | 2.00 | 2.00 | 2.13 | 2.78 |
| Down | ENSMUSG00000112483 | -4.14 | 4.34E-10 | Gm48542       | TEC | 3.99 | 4.09 | 3.93 | 3.69 | 2.00 | 2.00 | 2.00 | 2.70 |
| Down | ENSMUSG00000109206 | -3.09 | 4.81E-10 | Gm45137       | TEC | 3.72 | 3.92 | 3.89 | 3.74 | 2.13 | 2.44 | 2.00 | 2.78 |
| Down | ENSMUSG00000105700 | -4.33 | 5.49E-10 | Gm42772       | TEC | 3.91 | 3.92 | 4.20 | 3.55 | 2.00 | 2.53 | 2.00 | 2.12 |
| Down | ENSMUSG00000109709 | -1.89 | 6.09E-10 | Gm45290       | TEC | 4.11 | 4.13 | 4.13 | 4.45 | 2.66 | 3.28 | 2.63 | 3.23 |
| Down | ENSMUSG00000102593 | -3.85 | 6.38E-10 | Gm38384       | TEC | 3.56 | 4.09 | 4.09 | 3.65 | 2.13 | 2.44 | 2.00 | 2.34 |
| Down | ENSMUSG00000112254 | -2.96 | 7.02E-10 | Gm47690       | TEC | 3.44 | 3.88 | 3.89 | 3.94 | 2.66 | 2.34 | 2.00 | 2.54 |
| Up   | ENSMUSG00000103529 | 1.32  | 7.86E-10 | A730089K16Rik | TEC | 4.70 | 5.04 | 5.15 | 5.00 | 6.25 | 6.15 | 6.09 | 6.25 |
| Down | ENSMUSG00000103976 | -1.98 | 8.15E-10 | Gm37677       | TEC | 4.29 | 4.64 | 4.49 | 4.89 | 2.74 | 3.73 | 2.45 | 3.44 |
| Down | ENSMUSG00000109162 | -3.47 | 8.48E-10 | 2900027M19Rik | TEC | 4.11 | 3.92 | 3.84 | 3.33 | 2.37 | 2.44 | 2.00 | 2.34 |
| Down | ENSMUSG00000113326 | -3.47 | 8.59E-10 | Gm47586       | TEC | 3.72 | 4.01 | 3.80 | 3.74 | 2.00 | 2.12 | 2.00 | 2.85 |
| Down | ENSMUSG00000115023 | -3.52 | 1.09E-09 | Gm48967       | TEC | 4.22 | 3.03 | 3.97 | 4.28 | 2.47 | 2.00 | 2.00 | 2.70 |
| Down | ENSMUSG00000113055 | -2.83 | 1.10E-09 | Gm48700       | TEC | 3.86 | 3.57 | 3.80 | 3.86 | 2.00 | 2.62 | 2.00 | 2.85 |
| Down | ENSMUSG00000105950 | -2.74 | 1.25E-09 | Gm43679       | TEC | 4.26 | 4.31 | 4.05 | 3.86 | 3.11 | 2.53 | 2.13 | 2.44 |
| Up   | ENSMUSG00000109243 | 1.54  | 1.30E-09 | Gm45867       | TEC | 4.65 | 4.41 | 4.57 | 4.15 | 5.25 | 6.18 | 5.98 | 5.65 |
| Down | ENSMUSG00000106691 | -2.86 | 1.52E-09 | 2700029L08Rik | TEC | 3.25 | 4.13 | 3.84 | 3.86 | 2.13 | 2.44 | 2.00 | 2.92 |
| Down | ENSMUSG00000102940 | -3.35 | 1.56E-09 | Gm37551       | TEC | 3.86 | 3.92 | 3.30 | 2.37 | 2.00 | 2.12 | 2.63 | 2.24 |
| Down | ENSMUSG00000108597 | -6.67 | 1.58E-09 | Gm44708       | TEC | 3.61 | 3.83 | 4.52 | 3.60 | 2.00 | 2.00 | 2.00 | 2.12 |
| Down | ENSMUSG00000107962 | -1.79 | 1.63E-09 | Gm43980       | TEC | 5.34 | 5.23 | 5.32 | 3.81 | 5.57 | 3.28 | 4.57 | 3.57 |
| Down | ENSMUSG00000116626 | -2.47 | 1.69E-09 | Gm45705       | TEC | 3.72 | 3.57 | 4.87 | 3.96 | 2.90 | 2.92 | 2.70 | 2.70 |
| Down | ENSMUSG00000109167 | 2.00  | 1.72E-09 | Gm44829       | TEC | 3.91 | 4.31 | 4.68 | 3.98 | 2.37 | 3.06 | 3.30 | 3.06 |
| Down | ENSMUSG00000111131 | -4.51 | 1.83E-09 | 9930024M15Rik | TEC | 3.31 | 4.41 | 3.49 | 3.94 | 2.00 | 2.00 | 2.13 | 2.44 |
| Down | ENSMUSG00000105556 | -3.75 | 1.83E-09 | Gm43080       | TEC | 3.77 | 3.83 | 4.70 | 3.50 | 2.00 | 2.44 | 2.35 | 2.34 |
| Down | ENSMUSG00000103898 | -1.93 | 2.00E-09 | Gm30238       | TEC | 4.62 | 5.00 | 4.57 | 4.89 | 3.55 | 3.11 | 3.59 | 3.06 |
| Down | ENSMUSG00000103948 | -3.22 | 2.12E-09 | 4930594C11Rik | TEC | 3.56 | 3.46 | 3.70 | 4.12 | 2.00 | 2.00 | 2.00 | 2.99 |
| Down | ENSMUSG00000105981 | -2.79 | 2.22E-09 | 2810428J06Rik | TEC | 3.50 | 4.58 | 4.75 | 4.42 | 2.00 | 3.22 | 2.54 | 2.70 |
| Down | ENSMUSG00000107858 | -3.47 | 2.30E-09 | Gm43879       | TEC | 3.31 | 3.33 | 4.37 | 3.98 | 2.00 | 2.53 | 2.24 | 2.34 |
| Down | ENSMUSG00000103382 | -3.15 | 2.97E-09 | Gm37755       | TEC | 4.07 | 3.11 | 4.54 | 4.02 | 2.82 | 2.00 | 2.35 | 2.44 |
| Down | ENSMUSG00000103611 | -4.06 | 2.98E-09 | Gm37195       | TEC | 3.56 | 3.88 | 3.36 | 3.98 | 2.00 | 2.00 | 2.63 | 2.00 |
| Down | ENSMUSG00000106354 | -1.44 | 3.01E-09 | Gm42607       | TEC | 4.51 | 4.09 | 4.60 | 4.34 | 3.29 | 3.22 | 3.35 | 3.57 |
| Down | ENSMUSG00000104315 | -6.72 | 3.02E-09 | Gm37906       | TEC | 3.50 | 3.33 | 3.84 | 3.15 | 2.00 | 2.00 | 2.00 | 2.00 |
| Down | ENSMUSG00000109481 | -2.22 | 3.47E-09 | Gm45130       | TEC | 3.81 | 4.05 | 3.93 | 4.28 | 3.11 | 2.98 | 2.00 | 2.62 |
| Down | ENSMUSG00000112036 | -4.12 | 3.52E-09 | Gm47801       | TEC | 3.91 | 3.26 | 4.27 | 4.05 | 2.   |      |      |      |

|      |                    |       |          |               |     |      |      |      |      |      |      |      |      |
|------|--------------------|-------|----------|---------------|-----|------|------|------|------|------|------|------|------|
| Down | ENSMUSG00000103216 | -3.37 | 4.07E-09 | Gm37248       | TEC | 3.86 | 3.73 | 3.54 | 3.82 | 2.00 | 2.34 | 2.00 | 2.70 |
| Down | ENSMUSG00000108802 | -2.21 | 4.29E-09 | Gm44769       | TEC | 3.86 | 3.39 | 3.93 | 4.15 | 2.57 | 2.70 | 2.71 | 2.62 |
| Down | ENSMUSG00000112556 | -3.25 | 4.77E-09 | Gm47339       | TEC | 4.18 | 3.46 | 4.27 | 4.02 | 2.13 | 2.00 | 3.00 | 2.24 |
| Down | ENSMUSG00000103466 | -2.50 | 5.12E-09 | Gm37247       | TEC | 3.81 | 3.92 | 3.84 | 3.78 | 2.25 | 2.12 | 2.00 | 3.34 |
| Down | ENSMUSG00000103049 | -4.40 | 5.13E-09 | Gm37311       | TEC | 3.02 | 4.01 | 3.93 | 3.90 | 2.00 | 2.00 | 2.00 | 2.50 |
| Down | ENSMUSG00000108005 | -4.10 | 5.37E-09 | Gm44435       | TEC | 3.95 | 4.13 | 3.09 | 4.19 | 2.00 | 2.00 | 2.00 | 2.70 |
| Down | ENSMUSG00000106386 | -4.08 | 5.08E-09 | Gm42991       | TEC | 3.75 | 3.73 | 3.54 | 2.47 | 2.00 | 2.00 | 2.00 | 2.24 |
| Down | ENSMUSG00000106946 | -3.31 | 5.48E-09 | Gm42856       | TEC | 3.44 | 3.63 | 4.17 | 3.86 | 2.00 | 2.24 | 2.00 | 2.85 |
| Down | ENSMUSG00000107643 | -6.62 | 5.51E-09 | Gm43885       | TEC | 3.18 | 3.19 | 3.49 | 3.69 | 2.00 | 2.00 | 2.00 | 2.00 |
| Down | ENSMUSG00000110751 | -4.71 | 5.51E-09 | C230053D17Rik | TEC | 3.95 | 3.83 | 3.60 | 3.65 | 2.00 | 2.00 | 2.00 | 2.44 |
| Down | ENSMUSG00000109139 | -3.61 | 5.83E-09 | Gm44798       | TEC | 3.67 | 3.63 | 3.49 | 3.94 | 2.25 | 2.00 | 2.54 | 2.12 |
| Down | ENSMUSG00000104044 | -3.38 | 6.15E-09 | Gm37566       | TEC | 3.31 | 3.57 | 3.70 | 4.50 | 2.00 | 2.78 | 2.00 | 2.34 |
| Down | ENSMUSG00000102725 | -1.93 | 6.24E-09 | Gm37939       | TEC | 5.00 | 4.89 | 5.19 | 4.94 | 3.89 | 2.44 | 3.83 | 3.48 |
| Down | ENSMUSG00000108460 | -2.24 | 6.49E-09 | Gm39041       | TEC | 4.03 | 3.78 | 3.75 | 3.82 | 2.97 | 2.24 | 2.54 | 2.70 |
| Down | ENSMUSG00000109625 | -2.56 | 6.77E-09 | 3110080E11Rik | TEC | 4.11 | 4.13 | 3.97 | 3.50 | 3.17 | 2.12 | 2.13 | 2.62 |
| Down | ENSMUSG00000105201 | -5.31 | 7.26E-09 | Gm43362       | TEC | 3.56 | 4.05 | 4.20 | 3.69 | 2.00 | 2.24 | 2.00 | 2.12 |
| Down | ENSMUSG00000107756 | -3.09 | 7.95E-09 | Gm44164       | TEC | 3.56 | 3.63 | 3.23 | 4.05 | 2.25 | 2.00 | 2.00 | 2.85 |
| Down | ENSMUSG00000108465 | -3.31 | 8.63E-09 | Gm45110       | TEC | 2.85 | 4.72 | 4.40 | 4.31 | 2.90 | 2.34 | 2.00 | 2.44 |
| Down | ENSMUSG00000104033 | -3.48 | 9.51E-09 | Gm37773       | TEC | 3.44 | 3.52 | 3.89 | 3.98 | 2.74 | 2.12 | 2.00 | 2.12 |
| Up   | ENSMUSG00000103301 | 1.61  | 9.59E-09 | Gm37804       | TEC | 4.26 | 4.17 | 4.46 | 4.02 | 5.66 | 5.63 | 5.50 | 5.46 |
| Down | ENSMUSG00000107511 | 4.01  | 1.02E-08 | Gm44440       | TEC | 3.44 | 3.92 | 4.25 | 4.01 | 3.90 | 2.25 | 2.00 | 2.34 |
| Down | ENSMUSG00000109005 | -2.58 | 1.04E-08 | Gm45221       | TEC | 3.67 | 4.09 | 3.84 | 4.45 | 2.00 | 3.22 | 2.00 | 2.78 |
| Down | ENSMUSG00000114970 | -2.90 | 1.30E-08 | Gm49069       | TEC | 3.86 | 4.50 | 3.84 | 3.08 | 2.00 | 2.62 | 2.86 | 2.12 |
| Down | ENSMUSG00000107461 | -6.54 | 1.45E-08 | Gm44045       | TEC | 3.25 | 3.11 | 3.16 | 3.78 | 2.00 | 2.00 | 2.00 | 2.00 |
| Down | ENSMUSG00000102594 | -2.70 | 1.52E-08 | Gm38381       | TEC | 3.18 | 3.83 | 3.97 | 3.90 | 2.37 | 2.44 | 2.13 | 2.78 |
| Down | ENSMUSG00000102854 | -2.22 | 1.56E-08 | C130023A14Rik | TEC | 3.91 | 4.58 | 4.68 | 5.17 | 2.47 | 3.56 | 2.63 | 3.39 |
| Down | ENSMUSG00000113250 | -3.43 | 1.57E-08 | Gm48585       | TEC | 3.77 | 3.88 | 3.30 | 3.74 | 2.00 | 2.00 | 2.00 | 2.85 |
| Down | ENSMUSG00000102621 | -3.69 | 1.67E-08 | Gm37674       | TEC | 2.94 | 3.46 | 3.89 | 3.94 | 2.00 | 2.00 | 2.24 | 2.54 |
| Down | ENSMUSG00000110928 | -2.51 | 2.06E-08 | Gm48114       | TEC | 3.38 | 3.83 | 4.37 | 4.05 | 2.82 | 2.62 | 2.00 | 2.78 |
| Down | ENSMUSG00000104415 | -2.32 | 2.37E-08 | Gm37069       | TEC | 5.00 | 5.33 | 4.46 | 4.60 | 3.04 | 2.24 | 3.40 | 3.70 |
| Down | ENSMUSG00000102407 | -3.86 | 2.63E-08 | Gm37862       | TEC | 3.67 | 2.76 | 3.93 | 3.69 | 2.25 | 2.00 | 2.00 | 2.44 |
| Down | ENSMUSG00000109575 | -2.14 | 2.63E-08 | Gm44831       | TEC | 3.95 | 3.88 | 3.75 | 4.25 | 3.11 | 2.24 | 3.00 | 2.44 |
| Down | ENSMUSG00000102635 | -4.29 | 2.64E-08 | Gm36636       | TEC | 2.94 | 3.68 | 4.17 | 3.69 | 2.00 | 2.00 | 2.00 | 2.54 |
| Down | ENSMUSG00000113472 | -4.58 | 2.83E-08 | Gm47602       | TEC | 3.50 | 3.63 | 3.97 | 3.55 | 2.00 | 3.24 | 2.00 | 2.12 |
| Down | ENSMUSG00000103285 | -2.45 | 2.85E-08 | Gm37274       | TEC | 3.77 | 3.83 | 4.01 | 3.98 | 2.00 | 3.22 | 2.00 | 2.70 |
| Down | ENSMUSG00000104358 | -1.75 | 2.98E-08 | Gm37127       | TEC | 6.08 | 5.88 | 5.52 | 6.06 | 4.66 | 5.22 | 2.86 | 4.74 |
| Down | ENSMUSG00000107041 | -4.56 | 3.15E-08 | Gm42735       | TEC | 3.86 | 3.78 | 3.84 | 3.01 | 2.00 | 2.00 | 2.00 | 2.44 |
| Down | ENSMUSG00000105302 | -5.10 | 3.28E-08 | Gm19817       | TEC | 3.31 | 3.68 | 4.13 | 3.74 | 2.13 | 2.00 | 2.00 | 2.24 |
| Down | ENSMUSG00000104239 | -6.31 | 3.39E-08 | Gm37588       | TEC | 2.94 | 3.88 | 2.84 | 3.01 | 2.00 | 2.00 | 2.00 | 2.00 |
| Down | ENSMUSG00000108268 | -3.37 | 3.55E-08 | Gm44187       | TEC | 3.72 | 4.09 | 4.05 | 2.86 | 2.00 | 2.34 | 2.00 | 2.70 |
| Down | ENSMUSG00000107706 | -2.35 | 3.84E-08 | Gm44022       | TEC | 3.77 | 4.17 | 4.30 | 3.90 | 2.00 | 2.70 | 2.35 | 3.34 |
| Down | ENSMUSG00000103867 | -2.79 | 4.17E-08 | 9630010A21Rik | TEC | 3.67 | 3.68 | 3.80 | 3.27 | 2.00 | 2.74 | 2.00 | 2.62 |
| Down | ENSMUSG00000102950 | -3.61 | 4.50E-08 | Gm37018       | TEC | 3.31 | 3.88 | 3.23 | 4.12 | 2.13 | 2.00 | 2.00 | 2.70 |
| Down | ENSMUSG00000113841 | -2.25 | 4.96E-08 | Gm48701       | TEC | 4.03 | 4.27 | 4.09 | 3.78 | 2.47 | 2.85 | 2.93 | 2.62 |
| Down | ENSMUSG00000115380 | -2.50 | 5.10E-08 | Gm48932       | TEC | 4.03 | 3.97 | 4.01 | 4.12 | 2.47 | 2.00 | 3.00 | 2.85 |
| Down | ENSMUSG00000106291 | -3.52 | 5.26E-08 | Gm44292       | TEC | 3.56 | 4.20 | 3.16 | 3.39 | 2.00 | 2.12 | 2.00 | 2.70 |
| Down | ENSMUSG00000104153 | -5.06 | 5.79E-08 | Gm38105       | TEC | 3.61 | 3.73 | 3.75 | 3.78 | 2.25 | 2.00 | 2.12 | 2.44 |
| Down | ENSMUSG00000102676 | -3.74 | 6.05E-08 | Gm37435       | TEC | 4.93 | 4.74 | 4.65 | 4.65 | 2.37 | 2.00 | 2.45 | 3.12 |
| Down | ENSMUSG00000111918 | -3.75 | 6.08E-08 | Gm47624       | TEC | 3.38 | 3.03 | 3.60 | 3.86 | 2.00 | 2.12 | 2.00 | 2.54 |
| Down | ENSMUSG00000102764 | -3.33 | 6.18E-08 | Gm37183       | TEC | 3.18 | 3.78 | 3.49 | 3.90 | 2.25 | 2.24 | 2.00 | 2.54 |
| Down | ENSMUSG00000102317 | -1.78 | 6.22E-08 | Gm37628       | TEC | 4.36 | 4.17 | 4.37 | 4.58 | 3.64 | 2.53 | 2.93 | 3.29 |
| Down | ENSMUSG00000107362 | -2.53 | 6.50E-08 | Gm40309       | TEC | 3.31 | 3.33 | 3.97 | 3.82 | 2.66 | 2.00 | 2.86 | 2.12 |
| Down | ENSMUSG00000105322 | -2.13 | 6.82E-08 | Gm43751       | TEC | 3.50 | 4.13 | 3.84 | 3.98 | 2.25 | 3.11 | 2.13 | 2.99 |
| Down | ENSMUSG00000103509 | -2.38 | 6.88E-08 | Gm38372       | TEC | 5.47 | 5.41 | 5.56 | 6.24 | 2.74 | 2.98 | 4.61 | 3.81 |
| Down | ENSMUSG00000104293 | -2.08 | 6.96E-08 | Gm38043       | TEC | 3.81 | 3.52 | 3.75 | 4.09 | 2.00 | 2.70 | 3.35 | 2.24 |
| Down | ENSMUSG00000104362 | -1.16 | 7.58E-08 | Gm37928       | TEC | 4.62 | 5.14 | 5.09 | 4.89 | 3.81 | 3.69 | 4.27 | 4.14 |
| Down | ENSMUSG00000109370 | -5.92 | 7.63E-08 | Gm44675       | TEC | 3.67 | 4.20 | 4.05 | 3.69 | 2.00 | 2.00 | 2.00 | 2.00 |
| Down | ENSMUSG00000109642 | -3.61 | 8.15E-08 | Gm45289       | TEC | 3.44 | 3.68 | 3.97 | 3.00 | 2.00 | 2.00 | 2.00 | 2.00 |
| Down | ENSMUSG00000113917 | -4.07 | 8.37E-08 | Gm48382       | TEC | 3.56 | 3.73 | 3.70 | 3.15 | 2.00 | 2.12 | 2.00 | 2.44 |
| Down | ENSMUSG00000103571 | -5.15 | 9.27E-08 | Gm43662       | TEC | 3.38 | 3.88 | 4.01 | 3.78 | 2.00 | 2.00 | 2.00 | 2.34 |
| Down | ENSMUSG00000103706 | -2.71 | 9.48E-08 | 6820402A03Rik | TEC | 3.38 | 4.27 | 3.60 | 3.65 | 2.00 | 2.00 | 2.00 | 3.06 |
| Down | ENSMUSG00000104104 | -6.65 | 9.71E-08 | Gm37877       | TEC | 3.44 | 3.52 | 3.36 | 3.39 | 2.00 | 2.00 | 2.00 | 2.00 |
| Down | ENSMUSG00000113864 | -2.43 | 9.89E-08 | Gm48381       | TEC | 3.10 | 3.88 | 4.05 | 3.94 | 2.00 | 2.85 | 2.24 | 2.85 |
| Down | ENSMUSG00000108049 | -2.42 | 1.01E-07 | Gm44168       | TEC | 4.26 | 4.37 | 4.95 | 4.28 | 2.66 | 2.53 | 2.00 | 3.78 |
| Down | ENSMUSG00000105695 | -4.10 | 1.03E-07 | Gm43327       | TEC | 3.81 | 4.05 | 4.01 | 4.25 | 2.00 | 2.00 | 2.00 | 2.78 |
| Down | ENSMUSG00000105445 | -1.83 | 1.08E-07 | Gm42972       | TEC | 3.31 | 4.20 | 4.54 | 4.67 | 3.55 | 2.62 | 3.00 | 2.92 |
| Down | ENSMUSG00000102659 | -5.92 | 1.20E-07 | Gm37077       | TEC | 3.95 | 3.73 | 4.24 | 3.69 | 2.00 | 2.12 | 2.00 | 2.12 |
| Down | ENSMUSG00000110442 | -2.10 | 1.31E-07 | Gm45804       | TEC | 4.07 | 4.50 | 4.17 | 3.90 | 2.37 | 3.47 | 2.00 | 3.12 |
| Down | ENSMUSG00000108784 | -4.29 | 1.36E-07 | 4930517G19Rik | TEC | 3.81 | 3.19 | 3.23 | 3.60 | 2.47 | 2.00 | 2.00 | 2.00 |
| Down | ENSMUSG00000104027 | -2.52 | 1.36E-07 | Gm37211       | TEC | 3.18 | 3.78 | 3.20 | 4.22 | 2.00 | 2.86 | 2.00 | 2.86 |
| Down | ENSMUSG00000110269 | -2.42 | 1.40E-07 | Gm45258       | TEC | 4.07 | 3.33 | 3.23 | 4.05 | 2.00 | 2.70 | 2.35 | 2.85 |
| Down | ENSMUSG00000105973 | -2.22 | 1.40E-07 | Gm42881       | TEC | 3.38 | 4.31 | 4.27 | 4.37 | 2.74 | 3.17 | 2.00 | 2.99 |
| Down | ENSMUSG00000105701 | -6.73 | 1.42E-07 | Gm42887       | TEC | 3.38 | 3.78 | 3.36 | 3.33 | 2.00 | 2.00 | 2.00 | 2.00 |
| Down | ENSMUSG00000108146 | -2.89 | 1.44E-07 | Gm45959       | TEC | 3.44 | 3.63 | 3.83 | 2.25 | 2.00 | 2.12 | 2.00 | 2.00 |
| Down | ENSMUSG00000109505 | -2.23 | 1.45E-07 | Gm44677       | TEC | 4.07 | 4.77 | 4.78 | 4.02 | 2.25 | 2.92 | 2.54 | 3.70 |
| Down | ENSMUSG00000113385 | -4.01 | 1.49E-07 | Gm48405       | TEC | 3.56 | 3.39 | 3.89 | 3.08 | 2.00 | 2.53 | 2.00 | 2.00 |
| Down | ENSMUSG00000110914 | -3.72 | 1.70E-07 | Gm48611       | TEC | 3.18 | 3.57 | 3.65 | 3.50 | 2.00 | 2.00 | 2.00 | 2.62 |
| Down | ENSMUSG00000106043 | -1.04 | 1.72E-07 | Gm42968       | TEC | 5.78 | 5.76 | 6.07 | 5.94 | 4.42 | 4.87 | 5.16 | 5.23 |
| Down | ENSMUSG00000103780 | -3.42 | 1.75E-07 | Gm37524       | TEC | 3.56 | 3.03 | 3.65 | 3.45 | 2.25 | 2.00 | 2.00 | 2.54 |
| Down | ENSMUSG00000105679 | -4.19 | 1.79E-07 | Gm43338       | TEC | 3.50 | 3.78 | 3.60 | 3.60 | 2.00 | 2.00 | 2.00 | 2.54 |
| Down | ENSMUSG00000104324 | -2.39 | 1.88E-07 | Gm37320       | TEC | 3.67 | 4.44 | 4.17 | 3.55 | 2.66 | 2.78 | 2.00 | 2.99 |
| Down | ENSMUSG00000103984 | -1.80 | 1.95E-07 | Gm37447       | TEC | 3.56 | 4.41 | 4.57 | 3.94 | 2.74 | 2.92 | 2.79 | 3.44 |
| Down | ENSMUSG00000109279 | -2.56 | 2.01E-07 | Gm45220       | TEC | 3.56 | 3.83 | 3.43 | 3.78 | 2.13 | 2.00 | 2.45 | 2.99 |
| Down | ENSMUSG00000112067 | -3.32 | 2.18E-07 | Gm48015       | TEC | 3.44 | 3.97 | 3.75 | 3.65 | 2.00 | 2.00 | 2.00 | 2.92 |
| Down | ENSMUSG00000102729 | -2.23 | 2.35E-07 | Gm32444       | TEC | 3.77 | 4.93 | 4.20 | 3.82 | 3.23 | 2.62 | 2.71 | 2.71 |
| Down | ENSMUSG00000110411 | -2.16 | 2.44E-07 | Gm45457       | TEC | 3.25 | 3.97 | 4.17 | 3.94 | 2.00 | 2.12 | 2.79 | 3.34 |
| Down | ENSMUSG            |       |          |               |     |      |      |      |      |      |      |      |      |

|      |                    |       |          |               |     |      |      |      |      |      |      |      |      |
|------|--------------------|-------|----------|---------------|-----|------|------|------|------|------|------|------|------|
| Down | ENSMUSG00000108780 | -1.98 | 2.77E-07 | 543043F05Rik  | TEC | 4.29 | 4.01 | 4.70 | 4.12 | 2.00 | 3.43 | 2.63 | 3.44 |
| Down | ENSMUSG00000109217 | -3.46 | 2.78E-07 | Gm44676       | TEC | 3.25 | 3.03 | 3.84 | 3.60 | 2.47 | 2.12 | 2.00 | 2.24 |
| Down | ENSMUSG00000107021 | -2.56 | 2.86E-07 | Gm42853       | TEC | 4.18 | 3.39 | 4.75 | 4.19 | 2.00 | 2.62 | 2.35 | 3.39 |
| Down | ENSMUSG00000102411 | -2.30 | 2.89E-07 | Gm36936       | TEC | 4.80 | 3.83 | 4.57 | 4.22 | 2.74 | 2.78 | 2.00 | 3.62 |
| Down | ENSMUSG00000110084 | -2.28 | 2.95E-07 | Gm45257       | TEC | 3.77 | 3.88 | 4.27 | 2.94 | 2.25 | 2.78 | 2.00 | 3.06 |
| Down | ENSMUSG00000102602 | -1.52 | 2.97E-07 | A930004J17Rik | TEC | 4.42 | 5.25 | 5.07 | 5.50 | 3.04 | 3.47 | 4.43 | 4.14 |
| Down | ENSMUSG00000105495 | -2.89 | 3.09E-07 | Gm42447       | TEC | 4.23 | 3.82 | 3.86 | 4.22 | 3.74 | 2.00 | 2.70 | 2.12 |
| Down | ENSMUSG00000109529 | -2.15 | 3.15E-07 | Gm44801       | TEC | 3.86 | 4.24 | 4.01 | 4.65 | 3.11 | 2.00 | 2.86 | 3.23 |
| Down | ENSMUSG00000110159 | -2.54 | 3.29E-07 | Gm45501       | TEC | 3.10 | 3.52 | 4.05 | 3.74 | 2.47 | 3.05 | 2.00 | 2.00 |
| Down | ENSMUSG00000112248 | -4.49 | 3.41E-07 | Gm47910       | TEC | 3.67 | 3.46 | 3.65 | 3.65 | 2.00 | 2.12 | 2.00 | 2.34 |
| Down | ENSMUSG00000107571 | -5.99 | 3.67E-07 | Gm43877       | TEC | 2.85 | 2.86 | 3.09 | 3.33 | 2.00 | 2.00 | 2.00 | 2.00 |
| Down | ENSMUSG00000105936 | -5.90 | 3.70E-07 | Gm43544       | TEC | 3.02 | 3.68 | 3.01 | 3.74 | 2.00 | 2.00 | 2.00 | 2.12 |
| Down | ENSMUSG00000106211 | -5.75 | 3.70E-07 | Gm42842       | TEC | 3.86 | 3.33 | 3.93 | 3.94 | 2.00 | 2.00 | 2.00 | 2.24 |
| Down | ENSMUSG00000103122 | -6.07 | 3.81E-07 | Gm37391       | TEC | 2.65 | 3.26 | 3.09 | 3.27 | 2.00 | 2.00 | 2.00 | 2.00 |
| Down | ENSMUSG00000106560 | -4.74 | 4.04E-07 | Gm43119       | TEC | 3.50 | 3.33 | 3.65 | 3.50 | 2.00 | 2.00 | 2.00 | 2.34 |
| Down | ENSMUSG00000103730 | -2.43 | 4.08E-07 | Gm38316       | TEC | 4.77 | 4.64 | 4.75 | 4.82 | 3.37 | 3.61 | 3.19 | 2.70 |
| Down | ENSMUSG00000104287 | -6.86 | 4.13E-07 | Gm37456       | TEC | 3.10 | 3.26 | 4.01 | 3.69 | 2.00 | 2.00 | 2.00 | 2.00 |
| Down | ENSMUSG00000113690 | -2.13 | 4.43E-07 | Gm47826       | TEC | 3.61 | 4.34 | 3.70 | 4.09 | 2.37 | 2.00 | 3.24 | 2.99 |
| Down | ENSMUSG00000109359 | -4.43 | 4.54E-07 | Gm44797       | TEC | 2.85 | 3.92 | 3.65 | 3.65 | 2.00 | 2.12 | 2.00 | 2.34 |
| Down | ENSMUSG00000103914 | -4.03 | 4.63E-07 | Gm48624       | TEC | 2.54 | 4.37 | 3.16 | 3.39 | 2.00 | 2.34 | 2.00 | 2.24 |
| Down | ENSMUSG00000107155 | -5.90 | 4.69E-07 | Gm43793       | TEC | 2.85 | 2.66 | 2.85 | 4.02 | 2.00 | 2.00 | 2.00 | 2.12 |
| Down | ENSMUSG00000102868 | -3.26 | 4.69E-07 | Gm37633       | TEC | 3.72 | 2.76 | 3.49 | 4.02 | 2.00 | 2.12 | 2.00 | 2.78 |
| Down | ENSMUSG00000102995 | -1.97 | 5.15E-07 | A330074H02Rik | TEC | 3.81 | 3.83 | 3.54 | 4.25 | 3.29 | 2.62 | 2.00 | 2.85 |
| Down | ENSMUSG00000108526 | -3.09 | 5.85E-07 | Gm45828       | TEC | 3.18 | 3.52 | 3.80 | 2.77 | 2.37 | 2.00 | 2.13 | 2.44 |
| Down | ENSMUSG00000116735 | -3.84 | 5.87E-07 | Gm49555       | TEC | 3.56 | 3.26 | 3.23 | 3.50 | 2.13 | 2.00 | 2.00 | 2.44 |
| Down | ENSMUSG00000106870 | -1.66 | 6.01E-07 | Gm43681       | TEC | 4.62 | 4.20 | 4.75 | 5.05 | 2.74 | 3.38 | 3.35 | 4.02 |
| Down | ENSMUSG00000113752 | -3.56 | 6.23E-07 | Gm47817       | TEC | 3.18 | 3.52 | 3.89 | 3.45 | 2.00 | 2.00 | 2.35 | 2.44 |
| Down | ENSMUSG00000104078 | -3.43 | 6.28E-07 | Gm37023       | TEC | 3.31 | 3.57 | 3.93 | 3.39 | 2.00 | 2.24 | 2.63 | 2.00 |
| Down | ENSMUSG00000113076 | -3.26 | 6.37E-07 | Gm47088       | TEC | 3.18 | 3.52 | 3.89 | 2.49 | 2.00 | 2.24 | 2.54 | 2.00 |
| Down | ENSMUSG00000107205 | -5.62 | 6.45E-07 | Gm42576       | TEC | 3.31 | 3.46 | 3.23 | 2.94 | 2.00 | 2.00 | 2.00 | 2.12 |
| Down | ENSMUSG00000106414 | -4.56 | 7.41E-07 | Gm43320       | TEC | 3.67 | 3.88 | 3.23 | 3.78 | 2.00 | 2.00 | 2.00 | 2.44 |
| Down | ENSMUSG00000109576 | -3.51 | 7.60E-07 | Gm44704       | TEC | 3.38 | 3.63 | 3.30 | 3.65 | 2.37 | 2.44 | 2.00 | 2.00 |
| Down | ENSMUSG00000103214 | -2.34 | 7.63E-07 | Gm38286       | TEC | 3.56 | 3.68 | 3.49 | 3.33 | 2.00 | 3.24 | 2.53 | 2.00 |
| Down | ENSMUSG00000104571 | -5.69 | 7.92E-07 | Gm43010       | TEC | 3.81 | 4.47 | 3.09 | 3.21 | 2.00 | 2.00 | 2.24 | 2.00 |
| Down | ENSMUSG00000109784 | -1.90 | 7.93E-07 | Gm45493       | TEC | 3.10 | 4.17 | 3.93 | 4.05 | 2.97 | 3.92 | 2.45 | 2.70 |
| Down | ENSMUSG00000116881 | -3.16 | 7.97E-07 | Gm49674       | TEC | 3.44 | 3.97 | 3.84 | 3.97 | 2.00 | 4.74 | 2.53 | 2.00 |
| Down | ENSMUSG00000108808 | -5.79 | 8.50E-07 | Gm45204       | TEC | 2.94 | 3.03 | 3.60 | 3.65 | 2.00 | 2.00 | 2.00 | 2.12 |
| Down | ENSMUSG00000114153 | -2.93 | 8.70E-07 | Gm48692       | TEC | 3.18 | 3.52 | 3.49 | 3.60 | 2.25 | 2.00 | 2.45 | 2.44 |
| Down | ENSMUSG00000103818 | -4.71 | 9.08E-07 | Gm38009       | TEC | 3.50 | 3.11 | 3.60 | 3.65 | 2.00 | 2.00 | 2.35 | 2.00 |
| Down | ENSMUSG00000108819 | -5.67 | 9.61E-07 | Gm45177       | TEC | 3.31 | 3.46 | 3.09 | 3.20 | 2.00 | 2.12 | 2.00 | 2.00 |
| Down | ENSMUSG00000103544 | -3.47 | 9.61E-07 | Gm10048       | TEC | 3.50 | 4.09 | 3.30 | 3.33 | 2.00 | 2.34 | 2.00 | 2.54 |
| Down | ENSMUSG00000107370 | -2.41 | 9.64E-07 | Gm43588       | TEC | 3.44 | 4.05 | 3.49 | 3.39 | 2.00 | 2.12 | 2.71 | 2.85 |
| Down | ENSMUSG00000102267 | -2.69 | 9.77E-07 | 9530003O04Rik | TEC | 3.38 | 3.88 | 3.60 | 3.55 | 2.00 | 2.85 | 2.00 | 2.54 |
| Down | ENSMUSG00000113073 | -4.26 | 9.83E-07 | Gm48261       | TEC | 2.94 | 3.97 | 3.70 | 3.01 | 2.12 | 2.00 | 2.00 | 2.00 |
| Down | ENSMUSG00000103657 | -1.72 | 1.01E-06 | Gm37204       | TEC | 3.91 | 4.50 | 4.09 | 4.28 | 2.97 | 2.78 | 3.71 | 2.54 |
| Down | ENSMUSG00000109420 | -2.05 | 1.02E-06 | Gm37984       | TEC | 3.18 | 3.88 | 4.46 | 4.09 | 2.74 | 3.05 | 2.00 | 3.06 |
| Down | ENSMUSG00000104420 | -3.11 | 1.04E-06 | E230020A03Rik | TEC | 3.99 | 3.96 | 3.54 | 2.74 | 2.24 | 2.12 | 2.00 | 2.44 |
| Down | ENSMUSG00000102157 | -3.32 | 1.07E-06 | Gm37470       | TEC | 3.50 | 3.26 | 3.01 | 3.65 | 2.25 | 2.00 | 2.00 | 2.00 |
| Down | ENSMUSG00000104821 | -5.67 | 1.08E-06 | Gm42481       | TEC | 2.85 | 2.95 | 2.84 | 2.00 | 2.00 | 2.00 | 2.00 | 2.00 |
| Down | ENSMUSG00000106458 | -5.82 | 1.10E-06 | Gm42633       | TEC | 2.75 | 3.03 | 3.54 | 2.27 | 2.00 | 2.00 | 2.00 | 2.00 |
| Down | ENSMUSG00000114448 | -1.92 | 1.10E-06 | C630044B11Rik | TEC | 2.54 | 3.88 | 3.84 | 3.69 | 2.82 | 2.12 | 2.93 | 2.44 |
| Down | ENSMUSG00000106010 | -4.19 | 1.12E-06 | Gm42616       | TEC | 3.31 | 3.63 | 3.23 | 3.45 | 2.00 | 2.44 | 2.00 | 2.00 |
| Down | ENSMUSG00000104107 | -2.77 | 1.12E-06 | Gm37879       | TEC | 3.77 | 3.52 | 3.75 | 2.94 | 2.00 | 2.24 | 2.24 | 2.78 |
| Down | ENSMUSG00000105545 | -3.06 | 1.16E-06 | 4930599N24Rik | TEC | 2.94 | 3.11 | 3.70 | 4.09 | 2.00 | 2.00 | 2.86 | 2.12 |
| Down | ENSMUSG00000110972 | -4.17 | 1.23E-06 | 5830462O15Rik | TEC | 3.44 | 3.57 | 3.60 | 2.94 | 2.00 | 2.44 | 2.00 | 2.44 |
| Down | ENSMUSG00000105726 | -3.63 | 1.24E-06 | Gm42443       | TEC | 3.86 | 3.68 | 2.84 | 3.15 | 2.37 | 2.34 | 2.00 | 2.00 |
| Down | ENSMUSG00000108372 | -3.01 | 1.24E-06 | Gm45124       | TEC | 3.44 | 3.26 | 4.05 | 3.82 | 2.25 | 2.62 | 2.00 | 2.44 |
| Down | ENSMUSG00000103161 | -3.80 | 1.28E-06 | Gm38148       | TEC | 3.25 | 3.83 | 3.23 | 3.08 | 2.00 | 2.00 | 2.00 | 2.54 |
| Down | ENSMUSG00000108693 | -2.36 | 1.31E-06 | Gm45153       | TEC | 3.31 | 3.63 | 3.16 | 3.86 | 2.13 | 2.78 | 2.00 | 2.70 |
| Down | ENSMUSG00000109585 | -5.60 | 1.36E-06 | Gm45358       | TEC | 2.75 | 3.19 | 3.16 | 3.65 | 2.00 | 2.00 | 2.12 | 2.00 |
| Down | ENSMUSG00000114503 | -3.00 | 1.41E-06 | Gm20242       | TEC | 3.25 | 2.86 | 3.65 | 3.33 | 2.13 | 2.34 | 2.00 | 2.44 |
| Down | ENSMUSG00000108073 | -1.98 | 1.41E-06 | Gm42892       | TEC | 4.03 | 3.52 | 4.20 | 4.25 | 2.82 | 2.85 | 2.79 | 3.29 |
| Down | ENSMUSG00000105543 | -3.80 | 1.43E-06 | Gm43169       | TEC | 4.32 | 3.33 | 3.30 | 3.55 | 2.00 | 2.12 | 2.00 | 2.62 |
| Down | ENSMUSG00000102964 | -3.37 | 1.51E-06 | 9430034N14Rik | TEC | 3.72 | 3.73 | 2.64 | 4.09 | 2.00 | 2.12 | 2.00 | 2.78 |
| Down | ENSMUSG00000102831 | -5.98 | 1.53E-06 | Gm37382       | TEC | 3.61 | 2.86 | 2.74 | 2.77 | 2.00 | 2.00 | 2.00 | 2.00 |
| Down | ENSMUSG00000103739 | -2.34 | 1.54E-06 | Gm37653       | TEC | 3.25 | 3.83 | 4.05 | 3.45 | 2.00 | 2.62 | 2.00 | 3.12 |
| Down | ENSMUSG00000103194 | -3.78 | 1.59E-06 | Gm37643       | TEC | 3.02 | 2.76 | 3.75 | 3.65 | 2.00 | 2.12 | 2.00 | 2.44 |
| Down | ENSMUSG00000109725 | -4.55 | 1.63E-06 | Gm45265       | TEC | 3.25 | 3.52 | 3.16 | 3.55 | 2.00 | 2.00 | 2.24 | 2.12 |
| Down | ENSMUSG00000108238 | -3.73 | 1.73E-06 | Gm43984       | TEC | 3.61 | 2.86 | 3.23 | 3.50 | 2.00 | 2.00 | 2.00 | 2.54 |
| Down | ENSMUSG00000105326 | -2.71 | 2.05E-06 | 6030400A10Rik | TEC | 3.10 | 3.11 | 3.84 | 4.34 | 2.57 | 2.00 | 2.93 | 2.00 |
| Down | ENSMUSG00000107286 | -2.69 | 2.08E-06 | Gm43788       | TEC | 3.02 | 3.11 | 3.36 | 3.86 | 2.25 | 2.00 | 2.00 | 2.85 |
| Down | ENSMUSG00000103233 | -2.67 | 2.09E-06 | Gm37159       | TEC | 3.44 | 3.63 | 3.09 | 3.60 | 2.00 | 2.44 | 2.00 | 2.78 |
| Down | ENSMUSG00000103914 | -3.33 | 2.11E-06 | Gm38073       | TEC | 3.67 | 3.57 | 3.80 | 3.80 | 2.00 | 2.70 | 2.00 | 2.24 |
| Down | ENSMUSG00000107225 | -3.69 | 2.18E-06 | Gm43637       | TEC | 3.02 | 2.95 | 3.30 | 4.19 | 2.00 | 2.00 | 2.00 | 2.54 |
| Down | ENSMUSG00000113528 | -1.56 | 2.18E-06 | Gm32699       | TEC | 4.67 | 4.37 | 4.63 | 5.02 | 4.63 | 3.81 | 3.61 | 3.66 |
| Down | ENSMUSG00000105624 | -2.94 | 2.20E-06 | Gm43187       | TEC | 3.44 | 3.83 | 3.16 | 3.33 | 2.25 | 2.00 | 2.63 | 2.24 |
| Down | ENSMUSG00000102133 | -3.17 | 2.28E-06 | Gm37106       | TEC | 3.81 | 3.68 | 2.84 | 3.08 | 2.13 | 2.00 | 2.00 | 2.70 |
| Down | ENSMUSG00000102619 | -5.79 | 2.35E-06 | Gm37849       | TEC | 3.02 | 3.19 | 3.49 | 3.60 | 2.00 | 2.00 | 2.00 | 2.12 |
| Down | ENSMUSG00000103076 | -2.41 | 2.49E-06 | Gm37902       | TEC | 3.10 | 3.73 | 4.13 | 3.55 | 2.25 | 2.34 | 2.63 | 2.70 |
| Down | ENSMUSG00000102642 | -3.69 | 2.65E-06 | A130048G24Rik | TEC | 3.77 | 3.78 | 3.16 | 3.01 | 2.00 | 2.00 | 2.00 | 2.62 |
| Down | ENSMUSG00000103377 | -4.00 | 2.72E-06 | Gm37180       | TEC | 3.50 | 3.19 | 3.01 | 3.45 | 2.00 | 2.12 | 2.24 | 2.12 |
| Down | ENSMUSG00000107433 | -5.76 | 2.73E-06 | Gm43882       | TEC | 2.85 | 3.03 | 2.84 | 3.01 | 2.00 | 2.00 | 2.00 | 2.00 |
| Down | ENSMUSG00000102481 | -3.11 | 2.79E-06 | Gm37925       | TEC | 3.86 | 2.76 | 3.65 | 3.39 | 2.00 | 2.00 | 2.00 | 2.85 |
| Down | ENSMUSG00000106665 | -3.46 | 2.82E-06 | Gm43389       | TEC | 2.85 | 3.03 | 3.49 | 3.74 | 2.00 | 2.44 | 2.00 | 2.24 |
| Down | ENSMUSG00000106408 | -5.57 | 2.84E-06 | Gm43321       | TEC | 2.94 | 3.92 | 3.75 | 3.86 | 2.00 | 2.44 | 2.00 | 2.24 |
| Down | ENSMUSG00000105791 | -5.50 | 3.11E-06 | Gm43341       | TEC | 3.25 | 3.19 | 3.43 | 2.77 | 2.00 | 2.00 | 2.00 |      |

|        |                    |       |          |               |     |      |      |      |      |      |      |      |      |
|--------|--------------------|-------|----------|---------------|-----|------|------|------|------|------|------|------|------|
| Down   | ENSMUSG00000104271 | -5.36 | 3.42E-06 | Gm37891       | TEC | 3.61 | 3.88 | 3.43 | 3.08 | 2.00 | 2.00 | 2.00 | 2.24 |
| Down   | ENSMUSG00000103937 | -2.50 | 3.51E-06 | Gm37186       | TEC | 3.10 | 3.19 | 3.97 | 3.94 | 2.13 | 3.05 | 2.00 | 2.34 |
| Down   | ENSMUSG00000103000 | -3.25 | 3.56E-06 | Gm37900       | TEC | 3.50 | 3.97 | 3.97 | 3.55 | 2.00 | 2.00 | 2.00 | 2.78 |
| Down   | ENSMUSG00000107804 | -2.70 | 3.57E-06 | Gm44439       | TEC | 2.94 | 4.50 | 3.93 | 3.78 | 3.11 | 2.00 | 2.00 | 2.62 |
| Down   | ENSMUSG00000114584 | -1.21 | 3.67E-06 | Gm47694       | TEC | 4.80 | 5.47 | 5.49 | 5.00 | 3.64 | 3.65 | 4.59 | 4.59 |
| Down   | ENSMUSG00000106732 | -5.36 | 3.69E-06 | Gm43792       | TEC | 2.65 | 3.19 | 3.54 | 2.86 | 2.00 | 2.00 | 2.00 | 2.12 |
| Down   | ENSMUSG00000107940 | -2.30 | 3.70E-06 | Gm44241       | TEC | 3.38 | 3.73 | 3.09 | 3.65 | 2.00 | 2.00 | 2.00 | 2.24 |
| Down   | ENSMUSG00000103432 | -2.47 | 3.75E-06 | 6720464F23Rik | TEC | 2.85 | 4.05 | 3.43 | 3.78 | 2.00 | 2.34 | 2.45 | 2.85 |
| Down   | ENSMUSG00000103614 | -3.21 | 3.83E-06 | Gm37949       | TEC | 3.67 | 3.63 | 2.74 | 3.01 | 2.37 | 2.34 | 2.00 | 2.12 |
| Down   | ENSMUSG00000104994 | -3.76 | 4.05E-06 | Gm42989       | TEC | 3.50 | 3.57 | 3.43 | 3.55 | 2.00 | 2.00 | 2.00 | 2.62 |
| Down   | ENSMUSG00000114746 | -6.26 | 4.07E-06 | 4933436N17Rik | TEC | 3.50 | 2.86 | 2.64 | 3.55 | 2.00 | 2.00 | 2.00 | 2.00 |
| Up     | ENSMUSG00000103378 | 1.06  | 4.08E-06 | Gm37176       | TEC | 5.19 | 5.50 | 5.52 | 5.52 | 6.80 | 6.31 | 6.23 | 6.07 |
| Down   | ENSMUSG00000113309 | -2.36 | 4.16E-06 | Gm48408       | TEC | 4.42 | 4.93 | 4.78 | 4.72 | 2.00 | 3.05 | 3.45 | 3.34 |
| Down   | ENSMUSG00000113067 | -5.38 | 4.19E-06 | Gm47166       | TEC | 2.94 | 2.76 | 3.43 | 3.21 | 2.00 | 2.00 | 2.00 | 2.12 |
| Down   | ENSMUSG00000106859 | -2.52 | 4.27E-06 | Gm42737       | TEC | 3.25 | 3.26 | 3.65 | 3.55 | 2.00 | 2.44 | 2.00 | 2.00 |
| Down   | ENSMUSG00000113505 | -2.66 | 4.31E-06 | Gm48593       | TEC | 3.77 | 4.05 | 3.60 | 4.19 | 3.29 | 2.00 | 2.00 | 2.44 |
| Down   | ENSMUSG00000114624 | -1.80 | 4.38E-06 | Gm48267       | TEC | 3.61 | 3.63 | 4.24 | 3.45 | 2.37 | 3.05 | 3.00 | 2.44 |
| Down   | ENSMUSG00000103247 | -2.42 | 4.53E-06 | Gm38091       | TEC | 4.15 | 3.78 | 4.24 | 3.39 | 2.25 | 2.70 | 2.00 | 2.17 |
| Down   | ENSMUSG00000112420 | -5.60 | 4.74E-06 | Gm48543       | TEC | 2.43 | 3.39 | 3.09 | 2.27 | 2.00 | 2.00 | 2.00 | 2.00 |
| Down   | ENSMUSG00000107402 | -2.04 | 4.87E-06 | 4732418N19Rik | TEC | 4.77 | 4.47 | 4.27 | 4.34 | 2.13 | 3.80 | 2.45 | 3.29 |
| Down   | ENSMUSG00000113328 | -1.10 | 4.97E-06 | Gm47260       | TEC | 5.12 | 4.86 | 5.13 | 4.52 | 5.73 | 4.82 | 4.48 | 4.48 |
| Down   | ENSMUSG00000109555 | -2.39 | 5.00E-06 | Gm44891       | TEC | 3.18 | 3.19 | 4.09 | 3.50 | 2.47 | 2.98 | 2.00 | 2.12 |
| Down   | ENSMUSG00000109090 | -5.42 | 5.04E-06 | Gm45088       | TEC | 2.43 | 3.11 | 2.84 | 2.69 | 2.00 | 2.00 | 2.00 | 2.00 |
| Down   | ENSMUSG00000106103 | -3.85 | 5.17E-06 | Gm43081       | TEC | 3.50 | 3.63 | 3.54 | 3.60 | 2.00 | 2.00 | 2.13 | 2.54 |
| Down   | ENSMUSG00000106092 | -4.39 | 5.27E-06 | Gm43072       | TEC | 2.75 | 3.52 | 3.09 | 2.00 | 2.34 | 2.00 | 2.00 | 2.00 |
| Down   | ENSMUSG00000112548 | -5.45 | 5.54E-06 | Gm47338       | TEC | 3.10 | 2.95 | 3.09 | 3.39 | 2.00 | 2.00 | 2.00 | 2.12 |
| Down   | ENSMUSG00000105341 | -2.55 | 5.65E-06 | Gm43817       | TEC | 3.61 | 3.52 | 4.20 | 3.01 | 2.00 | 2.34 | 2.13 | 3.06 |
| Down   | ENSMUSG00000103238 | -2.34 | 5.73E-06 | Gm36527       | TEC | 3.25 | 4.13 | 4.17 | 3.78 | 2.37 | 2.24 | 2.54 | 3.12 |
| Down   | ENSMUSG00000107083 | -5.14 | 5.86E-06 | Gm43313       | TEC | 3.18 | 3.63 | 3.49 | 3.21 | 2.00 | 2.24 | 2.00 | 2.00 |
| Down   | ENSMUSG00000108341 | -3.80 | 6.06E-06 | Gm44746       | TEC | 2.30 | 2.95 | 3.80 | 3.27 | 2.00 | 2.24 | 2.00 | 2.24 |
| Down   | ENSMUSG00000104391 | -3.27 | 6.18E-06 | Gm37960       | TEC | 3.67 | 3.26 | 3.84 | 3.45 | 2.00 | 2.00 | 2.00 | 2.85 |
| Down   | ENSMUSG00000104919 | -5.29 | 6.32E-06 | Gm42617       | TEC | 3.38 | 3.03 | 3.09 | 2.69 | 2.00 | 2.00 | 2.00 | 2.12 |
| Down   | ENSMUSG00000104672 | -4.74 | 6.37E-06 | Gm48665       | TEC | 3.44 | 3.44 | 3.39 | 3.36 | 2.25 | 2.00 | 2.00 | 2.00 |
| Down   | ENSMUSG00000103981 | -5.58 | 6.63E-06 | Gm38031       | TEC | 3.44 | 3.33 | 3.30 | 3.46 | 2.00 | 2.00 | 2.00 | 2.34 |
| Down   | ENSMUSG00000105198 | -3.00 | 6.65E-06 | Gm42502       | TEC | 3.67 | 3.03 | 3.80 | 2.94 | 2.13 | 2.70 | 2.00 | 2.12 |
| Down   | ENSMUSG00000102466 | -2.28 | 6.65E-06 | Gm38200       | TEC | 3.61 | 3.63 | 3.16 | 3.65 | 2.37 | 2.85 | 2.35 | 2.24 |
| Down   | ENSMUSG00000106694 | -1.86 | 6.76E-06 | Gm42894       | TEC | 3.86 | 4.31 | 4.34 | 4.22 | 3.11 | 2.98 | 2.63 | 3.17 |
| Down   | ENSMUSG00000110499 | -3.59 | 6.77E-06 | Gm45873       | TEC | 3.10 | 3.52 | 3.93 | 2.86 | 2.13 | 2.24 | 2.00 | 2.34 |
| Down   | ENSMUSG00000104929 | -3.96 | 6.80E-06 | Gm42766       | TEC | 2.85 | 2.76 | 3.97 | 3.86 | 2.13 | 2.00 | 2.00 | 2.44 |
| Down   | ENSMUSG00000116888 | -5.49 | 7.20E-06 | 7120432i05Rik | TEC | 2.54 | 3.33 | 3.43 | 2.00 | 3.21 | 2.00 | 2.00 | 2.00 |
| Up     | ENSMUSG00000105776 | 1.01  | 7.27E-06 | Gm43292       | TEC | 5.10 | 4.97 | 4.73 | 4.85 | 5.47 | 6.15 | 5.66 | 5.91 |
| Down   | ENSMUSG00000107647 | -4.37 | 7.72E-06 | Gm44445       | TEC | 3.02 | 3.52 | 3.43 | 3.08 | 2.00 | 2.00 | 2.00 | 2.34 |
| Down   | ENSMUSG00000107207 | -4.42 | 8.09E-06 | Gm42897       | TEC | 2.65 | 3.68 | 3.80 | 3.82 | 2.00 | 2.00 | 2.13 | 2.34 |
| Down   | ENSMUSG00000105568 | -3.15 | 8.14E-06 | Gm42971       | TEC | 3.02 | 2.76 | 3.54 | 3.15 | 2.00 | 2.00 | 2.35 | 2.34 |
| Down   | ENSMUSG00000102963 | -2.31 | 8.16E-06 | Gm37945       | TEC | 3.56 | 3.57 | 4.09 | 3.90 | 2.00 | 2.70 | 2.00 | 3.23 |
| Down   | ENSMUSG00000103010 | -4.38 | 8.31E-06 | Gm37504       | TEC | 3.38 | 4.09 | 4.46 | 3.60 | 2.00 | 2.12 | 2.45 | 2.12 |
| Down   | ENSMUSG00000108353 | -2.50 | 8.37E-06 | Gm43205       | TEC | 3.05 | 4.09 | 3.54 | 3.90 | 2.00 | 2.62 | 3.00 | 2.00 |
| Down   | ENSMUSG00000103291 | -2.01 | 8.61E-06 | Gm38235       | TEC | 3.56 | 4.31 | 3.89 | 4.28 | 2.00 | 2.78 | 3.54 | 2.54 |
| Down   | ENSMUSG00000105946 | -3.42 | 8.80E-06 | Gm43776       | TEC | 3.02 | 3.52 | 3.60 | 3.55 | 2.00 | 2.00 | 2.00 | 2.70 |
| Down   | ENSMUSG00000104037 | -4.35 | 8.83E-06 | Gm37776       | TEC | 2.75 | 3.19 | 3.16 | 3.74 | 2.00 | 2.00 | 2.00 | 2.34 |
| Down   | ENSMUSG00000106149 | -2.30 | 8.97E-06 | Gm43430       | TEC | 3.44 | 3.78 | 4.01 | 4.31 | 2.13 | 2.62 | 2.00 | 3.39 |
| Down   | ENSMUSG00000105637 | -3.31 | 9.22E-06 | Gm42480       | TEC | 3.67 | 2.55 | 3.49 | 3.01 | 2.37 | 2.00 | 2.00 | 2.34 |
| Down   | ENSMUSG00000105942 | -2.52 | 9.34E-06 | Gm43175       | TEC | 2.85 | 3.52 | 3.43 | 3.55 | 2.57 | 2.70 | 2.00 | 2.00 |
| Down   | ENSMUSG00000108217 | -3.06 | 9.46E-06 | Gm43883       | TEC | 2.85 | 3.63 | 3.09 | 4.19 | 2.13 | 2.00 | 2.00 | 2.85 |
| Down   | ENSMUSG00000111605 | -1.65 | 9.53E-06 | 4632418H02Rik | TEC | 3.81 | 4.31 | 4.27 | 4.74 | 2.97 | 3.52 | 3.45 | 2.62 |
| Down   | ENSMUSG00000103973 | -2.28 | 9.54E-06 | BC055308      | TEC | 3.25 | 3.78 | 3.43 | 3.78 | 2.00 | 2.78 | 2.00 | 2.92 |
| Down   | ENSMUSG00000104852 | -2.91 | 9.58E-06 | Gm43201       | TEC | 3.56 | 2.76 | 3.89 | 3.65 | 2.62 | 2.00 | 2.00 | 2.54 |
| Down   | ENSMUSG00000111491 | -2.60 | 9.59E-06 | Gm47503       | TEC | 3.38 | 3.83 | 3.36 | 3.65 | 3.04 | 2.00 | 2.00 | 2.34 |
| Down   | ENSMUSG00000104383 | -3.71 | 9.74E-06 | Gm37553       | TEC | 3.50 | 2.43 | 3.89 | 3.08 | 2.00 | 2.00 | 2.45 | 2.12 |
| Down   | ENSMUSG00000112169 | -3.55 | 9.77E-06 | Gm48536       | TEC | 3.18 | 3.11 | 3.65 | 2.86 | 2.00 | 2.24 | 2.00 | 2.34 |
| Down   | ENSMUSG00000107905 | -2.82 | 1.00E-05 | Gm44230       | TEC | 3.81 | 3.57 | 3.09 | 3.69 | 2.82 | 2.00 | 2.24 | 2.24 |
| Down   | ENSMUSG00000102960 | -2.43 | 1.01E-05 | Gm37943       | TEC | 3.86 | 3.88 | 3.84 | 4.12 | 2.00 | 2.78 | 2.00 | 3.23 |
| Down   | ENSMUSG00000108825 | -3.32 | 1.02E-05 | Gm45838       | TEC | 2.65 | 3.97 | 4.09 | 4.15 | 2.82 | 2.00 | 2.00 | 2.34 |
| Down   | ENSMUSG00000116238 | -4.61 | 1.04E-05 | Gm49413       | TEC | 3.50 | 2.66 | 3.75 | 3.55 | 2.13 | 2.00 | 2.00 | 2.24 |
| Down   | ENSMUSG00000110077 | -2.55 | 1.04E-05 | Gm45632       | TEC | 3.10 | 3.46 | 3.49 | 3.15 | 2.00 | 2.34 | 2.45 | 2.44 |
| Down   | ENSMUSG00000102565 | -5.13 | 1.06E-05 | Gm37036       | TEC | 3.81 | 2.95 | 3.16 | 3.45 | 2.13 | 2.00 | 2.00 | 2.12 |
| Down   | ENSMUSG00000105733 | -2.02 | 1.07E-05 | Gm42973       | TEC | 3.18 | 3.19 | 3.84 | 3.55 | 2.74 | 2.12 | 2.00 | 2.99 |
| Down   | ENSMUSG00000106757 | -2.26 | 1.11E-05 | Gm43482       | TEC | 3.91 | 3.73 | 3.70 | 4.22 | 2.00 | 2.57 | 3.13 | 2.00 |
| Down   | ENSMUSG00000108088 | -5.33 | 1.14E-05 | Gm44229       | TEC | 2.43 | 3.11 | 2.84 | 3.65 | 2.00 | 2.00 | 2.00 | 2.12 |
| Down   | ENSMUSG00000102919 | -3.00 | 1.18E-05 | Gm37726       | TEC | 3.25 | 3.68 | 3.01 | 3.21 | 2.12 | 2.00 | 2.00 | 2.24 |
| Down   | ENSMUSG00000105750 | -2.68 | 1.19E-05 | Gm43130       | TEC | 3.25 | 4.24 | 3.65 | 3.33 | 2.34 | 2.24 | 2.00 | 2.34 |
| Down   | ENSMUSG00000104706 | -3.39 | 1.20E-05 | Gm43421       | TEC | 2.94 | 3.03 | 3.65 | 2.77 | 2.00 | 2.00 | 2.00 | 2.54 |
| Down   | ENSMUSG00000104432 | -2.30 | 1.27E-05 | A430027C01Rik | TEC | 3.56 | 3.39 | 3.89 | 3.57 | 2.00 | 2.77 | 2.00 | 2.71 |
| Down   | ENSMUSG00000103331 | -2.08 | 1.24E-05 | Gm37995       | TEC | 2.65 | 3.83 | 2.15 | 3.15 | 2.74 | 2.00 | 2.00 | 2.85 |
| Down   | ENSMUSG00000103642 | -3.03 | 1.26E-05 | Gm37769       | TEC | 3.02 | 3.03 | 3.70 | 3.74 | 2.00 | 2.24 | 2.00 | 2.70 |
| Down   | ENSMUSG00000102258 | -2.12 | 1.28E-05 | Gm38257       | TEC | 3.77 | 3.88 | 3.70 | 3.86 | 2.37 | 2.00 | 3.19 | 2.78 |
| Down   | ENSMUSG00000109775 | -2.35 | 1.30E-05 | Gm45297       | TEC | 3.72 | 3.46 | 3.27 | 3.20 | 2.85 | 2.00 | 2.00 | 2.85 |
| Down   | ENSMUSG00000104116 | -2.02 | 1.31E-05 | Gm37296       | TEC | 3.67 | 3.63 | 3.43 | 3.82 | 2.00 | 2.98 | 2.00 | 3.06 |
| Down   | ENSMUSG00000109873 | -3.02 | 1.36E-05 | Gm45407       | TEC | 2.94 | 3.39 | 3.30 | 3.15 | 2.74 | 2.00 | 2.00 | 2.00 |
| Down   | ENSMUSG00000104060 | -2.62 | 1.36E-05 | Gm37954       | TEC | 2.94 | 3.57 | 3.49 | 3.33 | 2.47 | 2.00 | 2.00 | 2.70 |
| Down   | ENSMUSG00000108910 | -5.31 | 1.37E-05 | Gm44625       | TEC | 2.16 | 2.95 | 3.23 | 2.38 | 2.00 | 2.00 | 2.00 | 2.00 |
| Down   | ENSMUSG00000104966 | -2.62 | 1.42E-05 | Gm43273       | TEC | 3.10 | 2.95 | 3.65 | 3.55 | 2.00 | 2.62 | 2.00 | 2.54 |
| Down   | ENSMUSG00000102672 | -2.37 | 1.43E-05 | Gm37105       | TEC | 3.10 | 3.57 | 3.30 | 3.50 | 2.13 | 2.62 | 2.00 | 2.54 |
| Down   | ENSMUSG00000102386 | -2.15 | 1.43E-05 | 2900022M07Rik | TEC | 3.56 | 3.46 | 3.65 | 3.08 | 2.37 | 2.53 | 2.63 | 2.34 |
| Down   | ENSMUSG00000107278 | -3.30 | 1.45E-05 | Gm42600       | TEC | 3.56 | 3.03 | 3.30 | 3.50 | 2.00 | 2.00 | 2.00 | 2.70 |
| Down   | ENSMUSG00000106448 | -2.77 | 1.46E-05 | Gm43486       | TEC | 4.48 | 4.56 | 4.52 | 4.55 | 2.00 | 2.98 | 2.00 | 3.48 |
| Down</ |                    |       |          |               |     |      |      |      |      |      |      |      |      |



|      |                    |       |          |               |     |      |      |      |      |      |      |      |      |
|------|--------------------|-------|----------|---------------|-----|------|------|------|------|------|------|------|------|
| Down | ENSMUSG00000106749 | -2.46 | 1.58E-05 | Gm43281       | TEC | 3.61 | 3.88 | 3.89 | 3.39 | 2.00 | 2.00 | 2.79 | 2.92 |
| Down | ENSMUSG00000103025 | -4.55 | 1.59E-05 | Gm37686       | TEC | 3.10 | 3.78 | 2.84 | 3.60 | 2.00 | 2.00 | 2.00 | 2.34 |
| Down | ENSMUSG00000103525 | -4.32 | 1.60E-05 | Gm37262       | TEC | 2.75 | 3.11 | 3.36 | 3.60 | 2.00 | 2.00 | 2.00 | 2.34 |
| Down | ENSMUSG00000105332 | -4.49 | 1.70E-05 | Gm43316       | TEC | 2.75 | 3.83 | 2.74 | 3.69 | 2.00 | 2.00 | 2.00 | 2.34 |
| Down | ENSMUSG00000107970 | -3.19 | 1.71E-05 | Gm49058       | TEC | 2.85 | 3.46 | 3.23 | 3.08 | 2.00 | 2.24 | 2.00 | 2.44 |
| Down | ENSMUSG00000102319 | -6.22 | 1.73E-05 | Gm37626       | TEC | 3.10 | 3.39 | 2.15 | 3.65 | 2.00 | 2.00 | 2.00 | 2.00 |
| Down | ENSMUSG00000102967 | -3.67 | 1.75E-05 | Gm38214       | TEC | 2.93 | 3.23 | 3.02 | 3.69 | 2.00 | 2.25 | 2.00 | 2.34 |
| Down | ENSMUSG00000106310 | -4.29 | 1.76E-05 | Gm43523       | TEC | 3.91 | 3.83 | 3.80 | 3.15 | 2.25 | 2.00 | 2.00 | 2.34 |
| Down | ENSMUSG00000113792 | -3.09 | 1.81E-05 | Gm10933       | TEC | 3.10 | 3.63 | 3.01 | 3.15 | 2.00 | 2.44 | 2.00 | 2.34 |
| Down | ENSMUSG00000103317 | -3.01 | 1.88E-05 | Gm38359       | TEC | 2.85 | 3.03 | 3.84 | 3.27 | 2.00 | 2.44 | 2.00 | 2.44 |
| Down | ENSMUSG00000103443 | -2.60 | 1.90E-05 | Gm37132       | TEC | 2.85 | 3.97 | 3.43 | 3.98 | 2.82 | 2.00 | 2.00 | 2.70 |
| Down | ENSMUSG00000110564 | -5.49 | 1.95E-05 | Gm45697       | TEC | 2.85 | 3.33 | 3.16 | 3.27 | 2.00 | 2.00 | 2.00 | 2.12 |
| Down | ENSMUSG00000102744 | -4.92 | 1.99E-05 | 5830444F18Rik | TEC | 2.54 | 3.57 | 3.30 | 3.39 | 2.00 | 2.00 | 2.00 | 2.24 |
| Down | ENSMUSG00000112367 | -4.02 | 2.00E-05 | A230081H15Rik | TEC | 3.02 | 3.63 | 2.93 | 3.55 | 2.25 | 2.00 | 2.13 | 2.12 |
| Down | ENSMUSG00000103624 | -3.96 | 2.07E-05 | Gm3081        | TEC | 2.75 | 3.63 | 2.64 | 3.74 | 2.13 | 2.12 | 2.00 | 2.24 |
| Down | ENSMUSG00000114707 | -3.18 | 2.09E-05 | Gm47558       | TEC | 3.61 | 3.46 | 3.65 | 2.77 | 2.00 | 2.12 | 2.00 | 2.24 |
| Down | ENSMUSG00000113927 | -3.32 | 2.15E-05 | 5330409N07Rik | TEC | 3.02 | 3.92 | 3.16 | 3.21 | 2.00 | 2.00 | 2.00 | 2.70 |
| Down | ENSMUSG00000106670 | -2.51 | 2.15E-05 | C230071H17Rik | TEC | 3.10 | 3.57 | 3.93 | 3.27 | 2.00 | 2.00 | 2.00 | 2.70 |
| Down | ENSMUSG00000105050 | -5.11 | 2.16E-05 | Gm42482       | TEC | 2.16 | 2.86 | 2.74 | 2.77 | 2.00 | 2.00 | 2.00 | 2.00 |
| Down | ENSMUSG00000104365 | -2.81 | 2.16E-05 | 4930470B4Rik  | TEC | 2.75 | 3.52 | 3.49 | 2.25 | 2.00 | 2.00 | 2.00 | 2.34 |
| Down | ENSMUSG00000109418 | -3.47 | 2.18E-05 | Gm44800       | TEC | 4.11 | 4.31 | 4.54 | 3.55 | 2.00 | 2.00 | 2.00 | 3.17 |
| Down | ENSMUSG00000102441 | -3.91 | 2.25E-05 | Gm38032       | TEC | 2.43 | 3.63 | 3.80 | 2.69 | 2.00 | 2.00 | 2.00 | 2.44 |
| Down | ENSMUSG00000107136 | -2.25 | 2.28E-05 | Gm42466       | TEC | 2.54 | 4.05 | 4.57 | 4.19 | 2.57 | 2.98 | 2.13 | 2.99 |
| Down | ENSMUSG00000105434 | -2.73 | 2.31E-05 | Gm43359       | TEC | 3.77 | 3.11 | 4.57 | 3.74 | 2.00 | 2.12 | 2.35 | 3.17 |
| Down | ENSMUSG00000109956 | -2.18 | 2.37E-05 | Gm45428       | TEC | 3.91 | 4.47 | 3.89 | 4.45 | 2.47 | 2.92 | 2.71 | 3.17 |
| Down | ENSMUSG00000109438 | -2.18 | 2.45E-05 | Gm45073       | TEC | 2.94 | 3.78 | 3.23 | 3.33 | 2.00 | 2.92 | 2.00 | 2.54 |
| Down | ENSMUSG00000107009 | -4.28 | 2.49E-05 | 6720475M21Rik | TEC | 2.94 | 3.03 | 3.75 | 3.01 | 2.00 | 2.00 | 2.00 | 2.34 |
| Down | ENSMUSG00000104205 | -4.85 | 2.54E-05 | Gm37396       | TEC | 3.18 | 3.11 | 2.84 | 3.60 | 2.00 | 2.00 | 2.00 | 2.24 |
| Down | ENSMUSG00000103046 | -3.59 | 2.63E-05 | Gm37309       | TEC | 3.72 | 2.95 | 2.42 | 3.55 | 2.00 | 2.00 | 2.00 | 2.44 |
| Down | ENSMUSG00000111481 | -3.23 | 2.63E-05 | Gm47652       | TEC | 3.44 | 4.69 | 2.84 | 3.69 | 2.13 | 2.78 | 2.13 | 2.54 |
| Down | ENSMUSG00000103195 | -3.59 | 2.65E-05 | Gm37644       | TEC | 3.38 | 3.78 | 3.01 | 3.33 | 2.00 | 2.00 | 2.13 | 2.24 |
| Down | ENSMUSG00000108678 | -2.87 | 2.71E-05 | Gm44758       | TEC | 3.67 | 3.73 | 3.23 | 3.33 | 2.25 | 2.00 | 2.00 | 2.85 |
| Down | ENSMUSG00000108563 | -2.60 | 2.75E-05 | Gm46628       | TEC | 2.85 | 4.31 | 2.95 | 2.82 | 2.00 | 2.00 | 2.00 | 2.34 |
| Down | ENSMUSG00000105983 | -3.44 | 2.84E-05 | Gm42770       | TEC | 3.56 | 3.97 | 4.20 | 3.65 | 2.00 | 2.65 | 2.35 | 2.44 |
| Down | ENSMUSG00000115210 | -1.96 | 2.88E-05 | Gm49308       | TEC | 3.50 | 4.50 | 3.80 | 4.25 | 2.00 | 3.11 | 2.54 | 3.39 |
| Down | ENSMUSG00000106758 | -3.36 | 2.95E-05 | Gm42731       | TEC | 2.94 | 3.63 | 3.65 | 3.27 | 2.00 | 2.00 | 2.00 | 2.70 |
| Down | ENSMUSG00000102951 | -5.34 | 3.00E-05 | Gm37216       | TEC | 3.02 | 3.73 | 2.54 | 2.77 | 2.00 | 2.12 | 2.00 | 2.00 |
| Down | ENSMUSG00000108920 | -4.87 | 3.00E-05 | Gm44678       | TEC | 3.25 | 3.39 | 3.36 | 2.86 | 2.00 | 2.12 | 2.00 | 2.12 |
| Down | ENSMUSG00000104145 | -1.95 | 3.00E-05 | D130019J16Rik | TEC | 3.18 | 3.46 | 3.80 | 3.55 | 2.00 | 2.78 | 2.86 | 2.44 |
| Down | ENSMUSG00000108993 | -2.61 | 3.03E-05 | Gm44846       | TEC | 4.07 | 5.17 | 5.24 | 5.09 | 2.00 | 2.70 | 3.90 | 3.06 |
| Down | ENSMUSG00000116397 | -5.50 | 3.08E-05 | Gm49525       | TEC | 2.85 | 3.03 | 3.16 | 3.55 | 2.00 | 2.00 | 2.00 | 2.12 |
| Down | ENSMUSG00000104576 | -5.01 | 3.08E-05 | F830115B05Rik | TEC | 2.75 | 3.11 | 3.23 | 2.49 | 2.00 | 2.00 | 2.00 | 2.12 |
| Down | ENSMUSG00000103940 | -2.48 | 3.08E-05 | Gm38227       | TEC | 4.07 | 4.37 | 4.09 | 3.60 | 2.13 | 2.62 | 2.93 | 2.78 |
| Down | ENSMUSG00000103552 | -3.21 | 3.10E-05 | Gm38217       | TEC | 2.54 | 4.13 | 2.64 | 3.33 | 2.00 | 2.34 | 2.00 | 2.44 |
| Down | ENSMUSG00000103932 | -3.71 | 3.22E-05 | Gm36963       | TEC | 3.02 | 3.73 | 2.64 | 3.60 | 2.00 | 2.12 | 2.00 | 2.44 |
| Down | ENSMUSG00000114104 | -5.05 | 3.24E-05 | Gm47585       | TEC | 2.43 | 2.86 | 3.54 | 2.69 | 2.00 | 2.12 | 2.00 | 2.00 |
| Down | ENSMUSG00000113065 | -1.86 | 3.25E-05 | Gm48870       | TEC | 3.97 | 3.44 | 4.52 | 3.45 | 3.05 | 3.05 | 2.13 | 2.70 |
| Down | ENSMUSG00000104410 | -3.64 | 3.26E-05 | Gm37066       | TEC | 2.54 | 3.11 | 3.49 | 3.08 | 2.00 | 3.00 | 2.00 | 2.34 |
| Down | ENSMUSG00000108601 | -2.28 | 3.29E-05 | Gm44645       | TEC | 4.22 | 4.31 | 4.37 | 4.09 | 2.12 | 2.12 | 2.79 | 3.66 |
| Down | ENSMUSG00000108574 | -3.98 | 3.42E-05 | Gm44981       | TEC | 2.94 | 3.46 | 2.74 | 3.01 | 2.25 | 2.00 | 2.00 | 2.12 |
| Down | ENSMUSG00000104488 | -3.11 | 3.52E-05 | Gm38062       | TEC | 3.56 | 3.19 | 3.36 | 3.69 | 2.00 | 2.12 | 2.00 | 2.78 |
| Down | ENSMUSG00000109044 | -3.64 | 3.57E-05 | Gm44680       | TEC | 3.18 | 2.95 | 3.23 | 3.01 | 2.13 | 2.00 | 2.13 | 2.24 |
| Down | ENSMUSG00000112106 | -3.48 | 3.57E-05 | Gm47026       | TEC | 2.65 | 3.39 | 4.01 | 2.94 | 2.00 | 2.00 | 2.54 | 2.12 |
| Down | ENSMUSG00000106676 | -2.42 | 3.60E-05 | Gm42895       | TEC | 3.72 | 3.46 | 3.54 | 3.90 | 2.00 | 2.98 | 2.00 | 2.70 |
| Down | ENSMUSG00000103412 | -2.98 | 3.67E-05 | Gm37340       | TEC | 2.75 | 3.33 | 2.93 | 3.15 | 2.25 | 2.24 | 2.00 | 2.24 |
| Down | ENSMUSG00000104525 | -2.28 | 3.83E-05 | Gm37334       | TEC | 4.15 | 3.73 | 4.87 | 4.15 | 2.37 | 2.00 | 2.24 | 3.34 |
| Down | ENSMUSG00000111341 | -2.99 | 3.95E-05 | Gm47111       | TEC | 3.67 | 2.95 | 3.43 | 3.45 | 2.00 | 3.45 | 2.71 | 2.24 |
| Down | ENSMUSG00000103916 | -2.21 | 3.96E-05 | Gm38071       | TEC | 3.96 | 4.37 | 4.34 | 4.25 | 3.77 | 3.47 | 2.00 | 2.44 |
| Down | ENSMUSG00000105962 | -2.98 | 4.03E-05 | Gm48652       | TEC | 2.65 | 2.86 | 3.60 | 2.57 | 2.24 | 2.00 | 2.00 | 2.12 |
| Down | ENSMUSG00000115340 | -2.83 | 4.12E-05 | Gm48965       | TEC | 3.77 | 2.86 | 3.30 | 3.78 | 2.00 | 2.00 | 2.00 | 2.99 |
| Down | ENSMUSG00000102321 | -2.67 | 4.17E-05 | Gm37792       | TEC | 2.65 | 3.39 | 3.30 | 3.65 | 2.24 | 2.00 | 2.00 | 2.54 |
| Down | ENSMUSG00000105374 | -3.56 | 4.24E-05 | Gm42551       | TEC | 2.43 | 3.26 | 3.36 | 3.60 | 2.00 | 2.00 | 2.00 | 2.54 |
| Down | ENSMUSG00000108478 | -2.86 | 4.46E-05 | Gm19514       | TEC | 3.25 | 4.17 | 3.30 | 3.45 | 2.47 | 2.00 | 2.63 | 2.24 |
| Down | ENSMUSG00000106516 | -5.19 | 4.47E-05 | Gm42441       | TEC | 2.94 | 2.30 | 3.09 | 2.27 | 2.00 | 2.00 | 2.00 | 2.00 |
| Down | ENSMUSG00000102719 | -2.69 | 4.47E-05 | Gm37760       | TEC | 3.25 | 3.92 | 3.89 | 3.82 | 2.25 | 2.24 | 2.24 | 2.92 |
| Down | ENSMUSG00000103763 | -4.99 | 4.48E-05 | Gm37860       | TEC | 3.10 | 2.66 | 2.54 | 3.21 | 2.00 | 2.00 | 2.00 | 2.12 |
| Down | ENSMUSG00000113078 | -3.08 | 4.59E-05 | Gm48734       | TEC | 3.67 | 3.33 | 3.49 | 3.69 | 2.37 | 2.00 | 2.00 | 2.70 |
| Down | ENSMUSG00000103891 | -2.08 | 4.62E-05 | Gm37941       | TEC | 3.44 | 3.46 | 3.36 | 3.33 | 2.00 | 3.00 | 2.00 | 2.62 |
| Down | ENSMUSG00000103761 | -1.98 | 4.62E-05 | Gm37859       | TEC | 3.38 | 3.68 | 3.60 | 3.45 | 2.00 | 2.78 | 2.24 | 2.99 |
| Down | ENSMUSG00000104114 | -3.52 | 4.69E-05 | Gm37297       | TEC | 2.85 | 3.03 | 3.16 | 3.08 | 2.00 | 2.12 | 2.13 | 2.24 |
| Down | ENSMUSG00000108918 | -2.79 | 4.72E-05 | Gm44802       | TEC | 3.25 | 2.66 | 3.97 | 2.86 | 2.12 | 2.00 | 2.00 | 2.70 |
| Down | ENSMUSG00000105962 | -5.58 | 4.82E-05 | Gm42432       | TEC | 2.00 | 3.11 | 3.16 | 2.86 | 2.00 | 2.00 | 2.00 | 2.00 |
| Down | ENSMUSG00000103962 | -2.09 | 4.86E-05 | Gm48562       | TEC | 3.56 | 3.88 | 3.49 | 3.27 | 2.90 | 2.34 | 2.00 | 2.78 |
| Down | ENSMUSG00000103859 | -1.62 | 4.87E-05 | Gm37807       | TEC | 4.82 | 5.26 | 4.12 | 5.62 | 3.60 | 4.87 | 3.00 | 4.81 |
| Down | ENSMUSG00000112944 | -3.70 | 4.89E-05 | Gm48885       | TEC | 2.43 | 3.92 | 2.42 | 3.78 | 2.00 | 2.00 | 2.00 | 2.54 |
| Down | ENSMUSG00000112142 | -3.04 | 4.95E-05 | Gm47022       | TEC | 3.25 | 3.33 | 3.54 | 3.15 | 2.00 | 2.34 | 2.00 | 2.54 |
| Down | ENSMUSG00000112203 | -1.11 | 5.11E-05 | Gm49167       | TEC | 5.31 | 5.04 | 5.31 | 5.84 | 4.06 | 5.84 | 4.73 | 5.99 |
| Down | ENSMUSG00000113687 | -4.70 | 5.13E-05 | Gm49703       | TEC | 3.18 | 3.03 | 3.01 | 3.27 | 2.00 | 2.00 | 2.00 | 2.24 |
| Down | ENSMUSG00000109036 | -4.74 | 5.15E-05 | 2210406H18Rik | TEC | 2.65 | 3.46 | 3.16 | 3.21 | 2.00 | 2.00 | 2.00 | 2.24 |
| Down | ENSMUSG00000102452 | -4.17 | 5.24E-05 | Gm38344       | TEC | 3.25 | 3.52 | 3.09 | 2.69 | 2.00 | 2.34 | 2.00 | 2.00 |
| Down | ENSMUSG00000108752 | -1.95 | 5.30E-05 | Gm45191       | TEC | 3.99 | 3.78 | 4.95 | 4.58 | 2.47 | 3.77 | 3.07 | 2.62 |
| Down | ENSMUSG00000107796 | -4.68 | 5.31E-05 | Gm44068       | TEC | 3.56 | 2.76 | 3.30 | 2.69 | 2.00 | 2.12 | 2.00 | 2.12 |
| Down | ENSMUSG00000107042 | -2.30 | 5.50E-05 | 4921513H07Rik | TEC | 2.54 | 3.68 | 3.89 | 3.50 | 2.00 | 2.44 | 2.86 | 2.24 |
| Down | ENSMUSG00000109191 | -2.11 | 5.54E-05 | Gm45131       | TEC | 3.38 | 3.88 | 3.43 | 2.86 | 2.25 | 2.62 | 2.00 | 2.85 |
| Down | ENSMUSG00000108519 | -3.27 | 5.61E-05 | 4833421K07Rik | TEC | 3.81 | 2.76 | 3.49 | 3.60 | 2.25 | 2.60 | 2.00 | 2.44 |
| Down | ENSMUSG00000103050 | -2.91 | 5.62E-05 | Gm38273       | TEC | 3.61 | 3.39 | 4.20 | 3.74 | 2.47 | 2.24 | 2.13 |      |

|      |                    |       |          |                |     |      |      |      |      |      |      |      |      |
|------|--------------------|-------|----------|----------------|-----|------|------|------|------|------|------|------|------|
| Down | ENSMUSG00000103783 | -2.53 | 5.84E-05 | Gm37522        | TEC | 2.94 | 3.39 | 3.80 | 3.74 | 2.00 | 2.00 | 2.86 | 2.54 |
| Down | ENSMUSG0000073867  | -1.09 | 5.86E-05 | AA474408       | TEC | 5.02 | 4.91 | 5.17 | 5.07 | 4.66 | 3.77 | 4.19 | 3.78 |
| Down | ENSMUSG00000103497 | -4.60 | 5.90E-05 | Gm37407        | TEC | 2.75 | 3.26 | 2.93 | 3.27 | 2.13 | 2.00 | 2.00 | 2.12 |
| Down | ENSMUSG00000110397 | -3.61 | 6.00E-05 | Gm45540        | TEC | 4.07 | 3.46 | 2.74 | 3.65 | 2.00 | 2.00 | 2.00 | 2.00 |
| Down | ENSMUSG00000103747 | -2.54 | 6.01E-05 | Gm38236        | TEC | 3.10 | 3.52 | 3.60 | 3.21 | 2.00 | 2.00 | 2.34 | 2.80 |
| Down | ENSMUSG00000109574 | -3.18 | 6.07E-05 | Gm42913        | TEC | 2.65 | 3.63 | 3.54 | 3.94 | 2.00 | 2.00 | 2.00 | 2.85 |
| Down | ENSMUSG00000115148 | -6.63 | 6.08E-05 | Gm49125        | TEC | 3.50 | 3.43 | 4.57 | 3.50 | 2.45 | 2.70 | 2.70 | 2.78 |
| Down | ENSMUSG00000109302 | -4.80 | 6.13E-05 | Gm44967        | TEC | 3.44 | 3.33 | 2.74 | 3.15 | 2.00 | 2.00 | 2.00 | 2.24 |
| Down | ENSMUSG00000104039 | -5.00 | 6.28E-05 | Gm37772        | TEC | 2.16 | 2.95 | 3.49 | 2.77 | 2.00 | 2.00 | 2.00 | 2.12 |
| Down | ENSMUSG00000108741 | -3.64 | 6.41E-05 | Gm44553        | TEC | 3.38 | 3.19 | 2.74 | 3.01 | 2.00 | 2.00 | 2.00 | 2.44 |
| Down | ENSMUSG00000102780 | -2.36 | 6.50E-05 | Gm38253        | TEC | 4.07 | 4.34 | 4.17 | 4.22 | 2.13 | 3.33 | 2.00 | 3.12 |
| Down | ENSMUSG00000105974 | -2.86 | 6.53E-05 | Gm43318        | TEC | 2.94 | 3.39 | 3.30 | 3.21 | 2.00 | 2.00 | 2.71 | 2.12 |
| Down | ENSMUSG00000102153 | -3.38 | 6.54E-05 | Gm37474        | TEC | 2.85 | 3.57 | 2.84 | 4.02 | 2.00 | 2.00 | 2.63 | 2.12 |
| Down | ENSMUSG00000107094 | -4.94 | 6.64E-05 | Gm43294        | TEC | 2.54 | 2.76 | 2.93 | 3.21 | 2.00 | 2.00 | 2.00 | 2.12 |
| Down | ENSMUSG00000106904 | -2.33 | 6.90E-05 | Gm43029        | TEC | 2.85 | 3.63 | 3.54 | 3.98 | 2.00 | 2.85 | 2.00 | 2.78 |
| Down | ENSMUSG00000105530 | -3.82 | 7.11E-05 | Gm43829        | TEC | 3.95 | 3.63 | 2.84 | 2.77 | 2.00 | 2.00 | 2.00 | 2.54 |
| Down | ENSMUSG00000112448 | -2.53 | 7.11E-05 | Gm48182        | TEC | 3.61 | 3.46 | 2.93 | 2.69 | 2.00 | 2.53 | 2.54 | 2.00 |
| Down | ENSMUSG00000102841 | -1.54 | 7.12E-05 | Gm38036        | TEC | 3.72 | 4.44 | 3.70 | 3.94 | 3.29 | 2.92 | 3.30 | 2.34 |
| Down | ENSMUSG00000107103 | -5.01 | 7.26E-05 | Gm43164        | TEC | 2.30 | 2.30 | 2.54 | 3.15 | 2.00 | 2.00 | 2.00 | 2.00 |
| Down | ENSMUSG00000110088 | -4.96 | 7.26E-05 | Gm45343        | TEC | 2.43 | 2.95 | 2.15 | 2.77 | 2.00 | 2.00 | 2.00 | 2.24 |
| Down | ENSMUSG00000102570 | -2.50 | 7.27E-05 | Gm37968        | TEC | 3.67 | 3.63 | 3.01 | 3.55 | 2.00 | 2.85 | 2.13 | 2.44 |
| Down | ENSMUSG00000103038 | -2.64 | 7.31E-05 | Gm37124        | TEC | 3.31 | 2.86 | 3.75 | 3.08 | 2.90 | 2.00 | 2.00 | 2.12 |
| Down | ENSMUSG00000104988 | -4.98 | 7.36E-05 | Gm43622        | TEC | 3.10 | 2.00 | 3.01 | 2.00 | 2.00 | 2.00 | 2.00 | 2.00 |
| Down | ENSMUSG00000108102 | -1.85 | 7.36E-05 | Gm44437        | TEC | 3.86 | 4.20 | 3.01 | 4.19 | 2.74 | 3.22 | 2.00 | 2.99 |
| Down | ENSMUSG00000103024 | -2.77 | 7.38E-05 | Gm37685        | TEC | 3.18 | 3.73 | 3.54 | 3.55 | 2.00 | 2.53 | 2.00 | 2.70 |
| Down | ENSMUSG00000102287 | -2.01 | 7.48E-05 | Gm37003        | TEC | 3.18 | 3.26 | 3.70 | 4.15 | 2.00 | 3.05 | 2.63 | 2.54 |
| Down | ENSMUSG00000102521 | -4.64 | 7.58E-05 | Gm37781        | TEC | 2.94 | 2.86 | 3.80 | 2.49 | 2.00 | 2.00 | 2.00 | 2.24 |
| Down | ENSMUSG00000113269 | -2.22 | 7.66E-05 | Gm47494        | TEC | 3.31 | 3.78 | 3.65 | 2.86 | 2.47 | 2.62 | 2.00 | 2.62 |
| Down | ENSMUSG00000105079 | -5.44 | 7.71E-05 | Gm43715        | TEC | 2.30 | 2.55 | 2.84 | 3.27 | 2.00 | 2.00 | 2.00 | 2.00 |
| Down | ENSMUSG00000104398 | -3.34 | 7.73E-05 | Gm37964        | TEC | 4.03 | 4.56 | 4.17 | 4.37 | 2.00 | 2.00 | 2.00 | 3.34 |
| Down | ENSMUSG00000104647 | -1.54 | 7.84E-05 | Gm43485        | TEC | 3.67 | 3.11 | 3.60 | 3.74 | 2.66 | 2.44 | 3.00 | 2.78 |
| Down | ENSMUSG00000104369 | -1.62 | 7.85E-05 | Gm38082        | TEC | 4.07 | 3.52 | 3.75 | 3.98 | 2.74 | 2.24 | 2.86 | 3.44 |
| Down | ENSMUSG00000110088 | -2.53 | 7.88E-05 | Gm45343        | TEC | 3.91 | 3.43 | 3.43 | 3.45 | 2.00 | 3.13 | 2.00 | 2.24 |
| Down | ENSMUSG00000108359 | -4.81 | 7.90E-05 | C430039J01Rik  | TEC | 3.02 | 2.55 | 3.01 | 2.69 | 2.00 | 2.00 | 2.12 | 2.00 |
| Down | ENSMUSG00000108115 | -2.54 | 7.98E-05 | Gm43420        | TEC | 3.25 | 3.26 | 4.52 | 3.08 | 3.04 | 2.44 | 2.00 | 2.12 |
| Down | ENSMUSG00000107966 | -2.13 | 8.03E-05 | Gm44001        | TEC | 3.02 | 3.78 | 4.30 | 3.01 | 2.37 | 3.23 | 2.12 | 3.03 |
| Down | ENSMUSG00000106391 | -3.72 | 8.10E-05 | Gm42690        | TEC | 3.86 | 3.57 | 3.65 | 3.39 | 2.00 | 2.00 | 2.00 | 2.70 |
| Down | ENSMUSG00000109513 | -1.59 | 8.10E-05 | Gm44928        | TEC | 6.46 | 5.35 | 5.83 | 5.58 | 4.16 | 4.32 | 5.19 | 3.78 |
| Down | ENSMUSG00000112307 | -1.88 | 8.19E-05 | Gm48751        | TEC | 4.18 | 4.05 | 4.20 | 3.86 | 3.40 | 2.92 | 2.00 | 2.99 |
| Down | ENSMUSG00000106045 | -2.70 | 8.45E-05 | Gm42996        | TEC | 2.75 | 3.33 | 3.16 | 3.21 | 2.00 | 2.00 | 2.00 | 2.78 |
| Down | ENSMUSG00000108447 | -2.48 | 8.45E-05 | Gm44567        | TEC | 3.02 | 3.11 | 3.23 | 3.33 | 2.00 | 2.34 | 2.00 | 2.70 |
| Down | ENSMUSG00000109040 | -1.90 | 8.52E-05 | Gm44542        | TEC | 3.77 | 3.68 | 3.49 | 4.19 | 2.24 | 2.86 | 2.62 | 2.62 |
| Down | ENSMUSG00000103348 | -5.13 | 8.54E-05 | Gm37053        | TEC | 3.44 | 3.03 | 2.29 | 2.94 | 2.00 | 2.12 | 2.00 | 2.00 |
| Down | ENSMUSG00000106384 | -3.61 | 8.59E-05 | Gm43188        | TEC | 2.43 | 3.68 | 4.30 | 3.74 | 2.00 | 2.78 | 2.00 | 2.00 |
| Down | ENSMUSG00000106469 | -5.13 | 8.67E-05 | C030015E24Rik  | TEC | 2.54 | 2.76 | 3.09 | 2.14 | 2.00 | 2.00 | 2.00 | 2.00 |
| Down | ENSMUSG00000103882 | -4.02 | 8.80E-05 | Gm37452        | TEC | 3.25 | 3.03 | 3.01 | 3.01 | 2.00 | 2.00 | 2.00 | 2.34 |
| Down | ENSMUSG00000113984 | -2.96 | 8.91E-05 | Gm49890        | TEC | 3.38 | 2.86 | 3.09 | 3.28 | 2.00 | 2.00 | 2.00 | 2.62 |
| Down | ENSMUSG00000105063 | -3.70 | 8.95E-05 | Gm43488        | TEC | 3.67 | 3.19 | 3.16 | 3.15 | 2.00 | 3.16 | 2.00 | 2.34 |
| Down | ENSMUSG00000107729 | -3.01 | 8.97E-05 | B230112124Rik  | TEC | 3.18 | 2.43 | 3.43 | 3.08 | 2.44 | 2.00 | 2.00 | 2.24 |
| Down | ENSMUSG00000104138 | -4.63 | 9.06E-05 | Gm36949        | TEC | 3.50 | 2.30 | 3.01 | 3.27 | 2.13 | 2.00 | 2.00 | 2.12 |
| Down | ENSMUSG00000102573 | -1.06 | 9.13E-05 | Gm7265         | TEC | 3.95 | 4.44 | 4.40 | 4.53 | 3.50 | 4.07 | 3.30 | 3.23 |
| Down | ENSMUSG00000103756 | -2.27 | 9.22E-05 | Gm37285        | TEC | 2.94 | 3.26 | 3.23 | 3.78 | 2.00 | 2.24 | 2.24 | 2.44 |
| Down | ENSMUSG00000108917 | -1.84 | 9.34E-05 | Gm38451        | TEC | 3.86 | 3.33 | 4.24 | 4.28 | 2.00 | 2.98 | 3.59 | 2.34 |
| Down | ENSMUSG00000113341 | -4.98 | 9.38E-05 | 9430031K09Rik  | TEC | 2.54 | 2.95 | 2.42 | 2.49 | 2.00 | 2.00 | 2.00 | 2.00 |
| Down | ENSMUSG00000106887 | -3.38 | 9.57E-05 | A930005G22Rik  | TEC | 3.38 | 3.46 | 3.36 | 4.19 | 2.00 | 2.00 | 2.00 | 2.85 |
| Down | ENSMUSG00000109606 | -2.87 | 9.74E-05 | Gm45537        | TEC | 3.02 | 2.95 | 3.16 | 2.86 | 2.00 | 2.00 | 2.00 | 2.62 |
| Down | ENSMUSG00000105720 | -2.29 | 9.84E-05 | Gm42440        | TEC | 3.67 | 4.09 | 3.75 | 3.67 | 3.17 | 2.00 | 2.00 | 2.92 |
| Down | ENSMUSG00000111003 | -4.59 | 9.90E-05 | Gm47122        | TEC | 2.85 | 3.03 | 2.84 | 3.45 | 2.00 | 2.00 | 2.00 | 2.00 |
| Down | ENSMUSG00000106254 | -2.99 | 1.01E-04 | Gm42907        | TEC | 3.31 | 3.39 | 2.84 | 2.59 | 2.13 | 2.00 | 2.24 | 2.34 |
| Down | ENSMUSG00000103373 | -2.78 | 1.01E-04 | Gm37238        | TEC | 3.95 | 5.02 | 4.78 | 5.05 | 2.92 | 2.00 | 2.00 | 2.24 |
| Down | ENSMUSG00000103032 | -2.07 | 1.02E-04 | Gm37121        | TEC | 3.81 | 3.39 | 3.23 | 2.97 | 2.00 | 2.24 | 2.24 | 2.78 |
| Down | ENSMUSG00000105510 | -5.18 | 1.04E-04 | Gm43815        | TEC | 2.94 | 2.43 | 2.74 | 2.59 | 2.00 | 2.00 | 2.00 | 2.00 |
| Down | ENSMUSG00000094832 | -2.41 | 1.04E-04 | Gm21846        | TEC | 2.65 | 3.68 | 3.30 | 3.39 | 2.47 | 2.00 | 2.35 | 2.54 |
| Down | ENSMUSG00000112317 | -2.34 | 1.04E-04 | Gm47580        | TEC | 3.56 | 2.30 | 3.23 | 3.08 | 2.57 | 2.00 | 2.45 | 2.12 |
| Down | ENSMUSG00000103225 | -2.26 | 1.04E-04 | Gm37731        | TEC | 3.44 | 3.46 | 3.89 | 2.86 | 2.00 | 3.11 | 2.00 | 2.34 |
| Down | ENSMUSG00000102533 | -1.35 | 1.04E-04 | Gm37226        | TEC | 4.26 | 4.17 | 3.75 | 4.28 | 3.23 | 3.11 | 3.13 | 3.39 |
| Down | ENSMUSG00000104061 | -4.05 | 1.09E-04 | Gm37953        | TEC | 3.44 | 2.86 | 2.74 | 3.21 | 2.00 | 2.00 | 2.00 | 2.34 |
| Down | ENSMUSG00000108055 | -3.62 | 1.09E-04 | Gm43876        | TEC | 3.81 | 3.33 | 3.36 | 3.08 | 2.00 | 2.00 | 2.00 | 2.62 |
| Down | ENSMUSG00000112637 | -2.00 | 1.09E-04 | Gm48225        | TEC | 3.18 | 3.92 | 3.36 | 3.90 | 2.00 | 2.98 | 2.63 | 2.62 |
| Down | ENSMUSG00000109131 | -3.52 | 1.10E-04 | Gm44862        | TEC | 2.43 | 3.33 | 3.01 | 3.21 | 2.00 | 2.12 | 2.00 | 2.34 |
| Down | ENSMUSG00000103303 | -2.55 | 1.11E-04 | Gm37802        | TEC | 3.25 | 3.52 | 3.16 | 4.15 | 2.13 | 2.92 | 2.00 | 2.44 |
| Down | ENSMUSG00000103824 | -5.26 | 1.12E-04 | Gm38177        | TEC | 3.02 | 2.00 | 3.23 | 2.27 | 2.00 | 2.00 | 2.00 | 2.00 |
| Down | ENSMUSG00000102417 | -4.00 | 1.12E-04 | Gm38239        | TEC | 3.94 | 3.46 | 3.30 | 2.94 | 2.00 | 2.00 | 2.00 | 2.00 |
| Down | ENSMUSG00000107806 | -2.07 | 1.14E-04 | Gm43873        | TEC | 3.10 | 3.68 | 3.68 | 3.69 | 2.12 | 2.00 | 2.24 | 2.44 |
| Down | ENSMUSG00000108904 | -1.66 | 1.14E-04 | Gm45819        | TEC | 4.84 | 4.95 | 4.60 | 4.37 | 3.11 | 3.43 | 3.24 | 3.92 |
| Down | ENSMUSG00000107782 | -3.98 | 1.17E-04 | Gm43888        | TEC | 2.43 | 3.11 | 3.43 | 3.08 | 2.00 | 2.00 | 2.00 | 2.34 |
| Down | ENSMUSG00000115095 | -2.45 | 1.18E-04 | Gm49311        | TEC | 3.10 | 3.11 | 3.09 | 3.60 | 2.00 | 2.00 | 2.00 | 2.00 |
| Down | ENSMUSG00000114193 | -1.73 | 1.18E-04 | Gm48139        | TEC | 2.94 | 3.57 | 3.75 | 3.45 | 2.82 | 2.70 | 2.00 | 2.78 |
| Down | ENSMUSG00000104469 | -3.27 | 1.19E-04 | Gm37663        | TEC | 2.65 | 3.33 | 3.09 | 3.15 | 2.13 | 2.12 | 2.24 | 2.12 |
| Down | ENSMUSG00000109031 | -1.22 | 1.21E-04 | Gm45201        | TEC | 4.65 | 4.41 | 4.73 | 4.31 | 3.29 | 3.05 | 4.33 | 3.44 |
| Down | ENSMUSG00000112512 | -5.18 | 1.22E-04 | Gm48203        | TEC | 2.65 | 2.86 | 2.54 | 2.69 | 2.00 | 2.00 | 2.00 | 2.00 |
| Down | ENSMUSG00000102721 | -2.89 | 1.23E-04 | A630081D01Rik  | TEC | 2.43 | 3.52 | 2.93 | 3.39 | 2.00 | 2.24 | 2.54 | 2.00 |
| Down | ENSMUSG00000104918 | -2.10 | 1.24E-04 | Gm42944        | TEC | 4.45 | 4.79 | 4.40 | 4.96 | 3.40 | 3.84 | 2.00 | 2.78 |
| Down | ENSMUSG00000104400 | -3.93 | 1.25E-04 | Gm38010        | TEC | 2.94 | 3.03 | 2.84 | 3.27 | 2.00 | 2.00 | 2.00 | 2.34 |
| Down | ENSMUSG00000113349 | -2.32 | 1.27E-04 | Gm48369        | TEC | 2.75 | 3.57 | 3.84 | 3.39 | 2.74 | 2.00 | 2.00 | 2.00 |
| Down | ENSMUSG00000106825 | -3.27 | 1.28E-04 | 2510016D111Rik | TEC | 2.54 | 3.73 | 3.54 | 2.69 | 2.00 | 2.13 | 2.13 | 2.44 |
| Down | EN                 |       |          |                |     |      |      |      |      |      |      |      |      |

|      |                    |       |          |               |     |      |      |      |      |      |      |      |      |
|------|--------------------|-------|----------|---------------|-----|------|------|------|------|------|------|------|------|
| Down | ENSMUSG00000114094 | -3.33 | 1.39E-04 | Gm48375       | TEC | 3.10 | 2.86 | 3.09 | 2.69 | 2.00 | 2.00 | 2.00 | 2.44 |
| Down | ENSMUSG00000103762 | -2.17 | 1.39E-04 | Gm37861       | TEC | 3.72 | 3.88 | 3.16 | 3.94 | 2.74 | 2.00 | 2.00 | 3.23 |
| Down | ENSMUSG00000108956 | -1.90 | 1.39E-04 | Gm45179       | TEC | 3.91 | 3.19 | 3.60 | 4.25 | 2.78 | 2.54 | 2.00 | 3.17 |
| Down | ENSMUSG00000104709 | -4.05 | 1.41E-04 | Gm42484       | TEC | 3.10 | 3.19 | 3.23 | 2.86 | 2.37 | 2.00 | 2.00 | 2.00 |
| Down | ENSMUSG00000114882 | -3.97 | 1.42E-04 | Gm48581       | TEC | 2.85 | 2.95 | 3.16 | 3.21 | 2.30 | 2.00 | 2.00 | 2.34 |
| Down | ENSMUSG00000102902 | -2.99 | 1.44E-04 | Gm38263       | TEC | 3.50 | 2.95 | 3.16 | 2.49 | 2.00 | 2.00 | 2.45 | 2.24 |
| Down | ENSMUSG00000104493 | -3.75 | 1.45E-04 | Gm19552       | TEC | 3.81 | 3.11 | 3.15 | 3.15 | 2.00 | 2.00 | 2.00 | 2.54 |
| Down | ENSMUSG00000104292 | -2.04 | 1.45E-04 | Gm38042       | TEC | 3.38 | 4.41 | 4.30 | 3.86 | 2.97 | 2.44 | 2.00 | 3.12 |
| Down | ENSMUSG00000103734 | -2.17 | 1.46E-04 | Gm37651       | TEC | 3.67 | 2.55 | 3.54 | 3.60 | 2.74 | 2.44 | 2.00 | 2.54 |
| Down | ENSMUSG00000104125 | -1.81 | 1.46E-04 | Gm37488       | TEC | 3.72 | 3.26 | 2.93 | 4.22 | 2.13 | 3.05 | 2.71 | 2.62 |
| Down | ENSMUSG00000109045 | -2.16 | 1.49E-04 | Gm45084       | TEC | 3.38 | 3.26 | 3.16 | 3.86 | 2.00 | 2.85 | 2.00 | 2.78 |
| Down | ENSMUSG00000105861 | -2.24 | 1.51E-04 | Gm43508       | TEC | 2.94 | 3.52 | 3.30 | 3.86 | 2.25 | 2.12 | 2.35 | 2.92 |
| Down | ENSMUSG00000108077 | -2.94 | 1.53E-04 | 6330415B21Rik | TEC | 3.18 | 2.95 | 3.30 | 3.55 | 2.00 | 2.00 | 2.79 | 2.00 |
| Down | ENSMUSG00000105613 | -2.06 | 1.53E-04 | Gm43684       | TEC | 4.26 | 4.50 | 4.17 | 4.58 | 2.00 | 3.69 | 2.63 | 3.17 |
| Down | ENSMUSG00000102673 | -2.05 | 1.53E-04 | Gm37437       | TEC | 3.38 | 3.78 | 3.43 | 3.69 | 2.74 | 2.70 | 2.54 | 2.24 |
| Down | ENSMUSG00000103343 | -2.01 | 1.57E-04 | Gm37052       | TEC | 3.77 | 3.46 | 3.75 | 3.33 | 2.00 | 3.17 | 2.00 | 2.78 |
| Down | ENSMUSG00000106962 | -4.02 | 1.59E-04 | Gm43633       | TEC | 2.43 | 3.46 | 3.30 | 2.94 | 2.00 | 2.00 | 2.00 | 2.34 |
| Down | ENSMUSG00000107448 | -3.73 | 1.62E-04 | Gm43947       | TEC | 3.02 | 2.86 | 2.64 | 3.15 | 2.00 | 2.00 | 2.00 | 2.30 |
| Down | ENSMUSG00000116624 | -3.44 | 1.62E-04 | Gm49706       | TEC | 2.54 | 2.86 | 3.16 | 3.27 | 2.00 | 2.00 | 2.00 | 2.44 |
| Down | ENSMUSG00000109596 | -1.40 | 1.64E-04 | Gm42822       | TEC | 3.31 | 4.27 | 3.84 | 3.55 | 2.98 | 2.71 | 2.00 | 2.54 |
| Down | ENSMUSG00000115161 | -2.11 | 1.68E-04 | Gm20555       | TEC | 3.50 | 2.95 | 3.84 | 3.45 | 2.00 | 2.12 | 2.45 | 3.12 |
| Down | ENSMUSG00000108008 | -3.07 | 1.70E-04 | Gm43869       | TEC | 3.50 | 3.52 | 3.84 | 2.69 | 2.00 | 2.12 | 2.00 | 2.78 |
| Down | ENSMUSG00000103272 | -1.60 | 1.70E-04 | Gm37914       | TEC | 3.56 | 3.57 | 2.93 | 3.86 | 2.66 | 2.24 | 2.86 | 2.92 |
| Down | ENSMUSG00000102419 | -2.70 | 1.73E-04 | Gm36940       | TEC | 3.61 | 2.95 | 3.09 | 3.15 | 2.00 | 2.53 | 2.45 | 2.00 |
| Down | ENSMUSG00000105990 | -5.09 | 1.79E-04 | Gm43307       | TEC | 3.61 | 3.33 | 3.23 | 3.21 | 2.00 | 2.00 | 2.00 | 2.24 |
| Down | ENSMUSG00000105828 | -4.64 | 1.79E-04 | Gm43048       | TEC | 2.85 | 3.11 | 3.36 | 3.01 | 2.00 | 2.24 | 2.00 | 2.00 |
| Down | ENSMUSG00000113290 | -5.30 | 1.87E-04 | A530058O07Rik | TEC | 2.85 | 3.19 | 2.64 | 3.45 | 2.00 | 2.00 | 2.13 | 2.00 |
| Up   | ENSMUSG00000102299 | 1.44  | 1.92E-04 | Gm37539       | TEC | 4.18 | 3.39 | 4.49 | 4.05 | 5.50 | 5.43 | 5.10 | 5.06 |
| Down | ENSMUSG0000031802  | -2.33 | 1.92E-04 | Phxr4         | TEC | 3.18 | 3.33 | 3.30 | 3.45 | 2.00 | 2.34 | 2.00 | 2.92 |
| Down | ENSMUSG00000103149 | -2.90 | 1.93E-04 | AA914427      | TEC | 3.72 | 4.13 | 3.75 | 3.69 | 2.37 | 2.00 | 2.79 | 2.44 |
| Down | ENSMUSG00000107240 | -2.44 | 1.93E-04 | Gm43231       | TEC | 3.10 | 3.57 | 3.80 | 4.25 | 2.92 | 2.00 | 2.00 | 2.70 |
| Down | ENSMUSG00000108040 | -2.87 | 1.94E-04 | Gm43900       | TEC | 4.29 | 3.88 | 3.54 | 3.90 | 2.00 | 2.92 | 2.45 | 2.34 |
| Down | ENSMUSG00000113335 | -5.54 | 1.97E-04 | Gm48266       | TEC | 2.65 | 3.11 | 2.93 | 2.59 | 2.00 | 2.00 | 2.00 | 2.00 |
| Down | ENSMUSG00000107454 | -4.40 | 2.06E-04 | Gm43875       | TEC | 3.02 | 2.55 | 3.23 | 2.00 | 2.04 | 2.00 | 2.00 | 2.00 |
| Down | ENSMUSG00000106858 | -2.91 | 2.07E-04 | Gm43844       | TEC | 4.57 | 3.73 | 4.40 | 3.90 | 2.13 | 2.12 | 2.00 | 3.44 |
| Down | ENSMUSG00000103889 | -3.05 | 2.09E-04 | Gm37011       | TEC | 2.54 | 3.46 | 3.09 | 3.15 | 2.00 | 2.00 | 2.13 | 2.50 |
| Down | ENSMUSG00000105894 | -4.45 | 2.13E-04 | Gm42710       | TEC | 3.18 | 3.19 | 2.42 | 3.08 | 2.13 | 2.00 | 2.00 | 2.12 |
| Down | ENSMUSG00000105822 | -1.60 | 2.13E-04 | Gm42969       | TEC | 3.18 | 4.24 | 3.43 | 3.55 | 2.47 | 3.11 | 2.35 | 2.99 |
| Down | ENSMUSG00000105848 | -2.15 | 2.14E-04 | Gm42683       | TEC | 3.18 | 3.26 | 3.49 | 3.60 | 2.25 | 2.00 | 2.63 | 2.78 |
| Down | ENSMUSG00000104010 | -2.17 | 2.17E-04 | Gm37366       | TEC | 2.85 | 3.11 | 4.09 | 3.21 | 2.25 | 2.62 | 2.13 | 2.70 |
| Down | ENSMUSG00000112369 | -3.66 | 2.19E-04 | Gm47911       | TEC | 3.25 | 2.55 | 3.16 | 3.33 | 2.00 | 2.34 | 2.00 | 2.12 |
| Down | ENSMUSG00000110986 | -2.73 | 2.19E-04 | Gm20276       | TEC | 3.10 | 3.26 | 3.23 | 3.33 | 2.00 | 2.62 | 2.00 | 2.34 |
| Down | ENSMUSG00000109057 | -2.62 | 2.19E-04 | Gm44741       | TEC | 3.61 | 3.03 | 3.09 | 4.34 | 2.00 | 2.62 | 2.00 | 2.85 |
| Down | ENSMUSG00000112391 | -2.54 | 2.24E-04 | Gm48230       | TEC | 4.32 | 3.78 | 3.97 | 4.12 | 2.00 | 4.12 | 3.30 | 2.70 |
| Down | ENSMUSG00000103662 | -1.90 | 2.25E-04 | Gm34294       | TEC | 4.42 | 3.52 | 3.65 | 3.74 | 3.35 | 2.92 | 2.00 | 2.54 |
| Down | ENSMUSG00000112008 | -2.56 | 2.32E-04 | Gm47218       | TEC | 2.75 | 2.76 | 3.65 | 3.50 | 2.00 | 2.00 | 2.54 | 2.54 |
| Down | ENSMUSG00000104017 | -1.89 | 2.35E-04 | Gm37363       | TEC | 3.02 | 3.11 | 3.70 | 3.20 | 2.00 | 2.37 | 2.70 | 2.70 |
| Down | ENSMUSG00000102681 | -3.69 | 2.36E-04 | Gm37221       | TEC | 2.94 | 3.11 | 2.54 | 3.01 | 2.00 | 2.24 | 2.00 | 2.12 |
| Down | ENSMUSG00000114555 | -2.44 | 2.37E-04 | Gm48706       | TEC | 2.75 | 3.11 | 3.54 | 2.75 | 2.12 | 2.12 | 2.00 | 2.34 |
| Down | ENSMUSG00000103596 | -1.86 | 2.38E-04 | Gm37354       | TEC | 3.02 | 3.11 | 3.84 | 3.65 | 2.57 | 3.05 | 2.00 | 2.44 |
| Down | ENSMUSG00000111509 | -3.62 | 2.39E-04 | Gm47266       | TEC | 2.75 | 3.03 | 2.93 | 3.50 | 2.00 | 2.00 | 2.00 | 2.44 |
| Down | ENSMUSG00000102410 | -4.88 | 2.43E-04 | Gm36935       | TEC | 3.10 | 2.16 | 2.15 | 2.69 | 2.00 | 2.00 | 2.00 | 2.00 |
| Down | ENSMUSG00000107823 | -4.69 | 2.44E-04 | Gm44436       | TEC | 2.94 | 3.52 | 3.23 | 2.89 | 2.00 | 2.00 | 2.00 | 2.24 |
| Down | ENSMUSG00000107668 | -5.09 | 2.45E-04 | Gm44424       | TEC | 2.85 | 3.11 | 3.09 | 2.77 | 2.00 | 2.00 | 2.00 | 2.12 |
| Down | ENSMUSG00000112020 | -4.84 | 2.46E-04 | Gm48532       | TEC | 2.43 | 3.19 | 2.42 | 2.00 | 2.00 | 2.00 | 2.00 | 2.00 |
| Down | ENSMUSG00000115543 | -2.08 | 2.47E-04 | B230362B09Rik | TEC | 2.85 | 2.66 | 3.65 | 3.08 | 2.37 | 2.34 | 2.00 | 2.62 |
| Down | ENSMUSG00000114016 | -3.77 | 2.55E-04 | Gm47258       | TEC | 2.75 | 2.55 | 3.09 | 3.27 | 2.00 | 3.24 | 2.00 | 2.20 |
| Down | ENSMUSG00000108189 | -2.29 | 2.57E-04 | Gm43887       | TEC | 3.18 | 3.03 | 3.84 | 3.50 | 2.25 | 2.12 | 2.93 | 2.70 |
| Down | ENSMUSG00000107596 | -2.61 | 2.58E-04 | Gm44423       | TEC | 2.75 | 4.41 | 3.60 | 3.78 | 2.00 | 2.00 | 2.93 | 2.24 |
| Down | ENSMUSG00000108790 | -2.12 | 2.59E-04 | Gm44806       | TEC | 3.02 | 3.57 | 2.93 | 3.60 | 2.00 | 2.24 | 2.45 | 2.85 |
| Down | ENSMUSG00000108256 | -4.81 | 2.60E-04 | Gm44681       | TEC | 2.94 | 2.43 | 2.29 | 2.49 | 2.00 | 2.00 | 2.00 | 2.00 |
| Down | ENSMUSG00000113965 | -3.43 | 2.60E-04 | A730091E23Rik | TEC | 3.86 | 3.92 | 3.93 | 4.15 | 2.00 | 2.00 | 2.00 | 3.06 |
| Down | ENSMUSG00000107967 | -2.60 | 2.62E-04 | Gm44094       | TEC | 3.02 | 2.95 | 2.84 | 3.08 | 2.00 | 2.34 | 2.24 | 2.24 |
| Down | ENSMUSG00000106337 | -3.24 | 2.64E-04 | Gm42478       | TEC | 2.94 | 2.95 | 3.01 | 2.69 | 2.00 | 2.00 | 2.00 | 2.44 |
| Down | ENSMUSG00000110556 | -2.20 | 2.65E-04 | Gm45762       | TEC | 3.10 | 3.26 | 3.36 | 3.21 | 2.00 | 2.62 | 2.63 | 2.12 |
| Down | ENSMUSG00000106049 | -2.54 | 2.68E-04 | Gm43019       | TEC | 2.30 | 3.11 | 3.75 | 3.60 | 2.00 | 2.62 | 2.24 | 2.34 |
| Down | ENSMUSG00000104453 | -1.84 | 2.71E-04 | Gm37829       | TEC | 3.95 | 4.13 | 3.75 | 4.42 | 2.00 | 3.38 | 3.40 | 2.44 |
| Down | ENSMUSG00000107624 | -1.54 | 2.75E-04 | Gm44005       | TEC | 3.99 | 3.92 | 4.52 | 3.45 | 2.37 | 3.69 | 2.45 | 3.17 |
| Down | ENSMUSG00000102749 | -4.32 | 2.81E-04 | Gm37598       | TEC | 2.65 | 2.55 | 2.93 | 2.38 | 2.00 | 2.00 | 2.00 | 2.12 |
| Down | ENSMUSG00000113003 | -1.84 | 2.90E-04 | Gm47138       | TEC | 3.86 | 4.01 | 3.97 | 3.82 | 2.90 | 3.52 | 2.13 | 2.34 |
| Down | ENSMUSG00000110540 | -1.92 | 3.03E-04 | Gm45743       | TEC | 3.18 | 2.95 | 3.16 | 3.90 | 2.00 | 2.44 | 2.00 | 2.54 |
| Down | ENSMUSG00000107813 | -2.37 | 3.10E-04 | Gm44434       | TEC | 3.18 | 3.03 | 2.84 | 3.60 | 2.00 | 2.70 | 2.00 | 2.44 |
| Down | ENSMUSG00000108064 | -1.56 | 3.12E-04 | Gm44423       | TEC | 3.18 | 3.92 | 3.60 | 4.28 | 2.47 | 3.47 | 2.99 | 3.47 |
| Down | ENSMUSG00000103854 | -3.30 | 3.19E-04 | Gm37250       | TEC | 2.65 | 2.43 | 3.97 | 3.30 | 2.00 | 3.33 | 2.00 | 2.34 |
| Down | ENSMUSG00000108807 | -3.87 | 3.25E-04 | 4833404L02Rik | TEC | 3.31 | 3.39 | 3.01 | 3.15 | 2.00 | 2.00 | 2.35 | 2.12 |
| Down | ENSMUSG00000103388 | -2.31 | 3.26E-04 | Gm37581       | TEC | 2.43 | 3.63 | 3.30 | 3.08 | 2.37 | 2.00 | 2.00 | 2.78 |
| Down | ENSMUSG00000115228 | -3.41 | 3.29E-04 | Gm48948       | TEC | 2.85 | 3.19 | 2.84 | 3.01 | 2.12 | 2.12 | 2.13 | 2.24 |
| Down | ENSMUSG00000104034 | -1.68 | 3.30E-04 | 2900092N22Rik | TEC | 3.18 | 3.78 | 3.93 | 3.60 | 3.04 | 2.44 | 2.35 | 2.99 |
| Down | ENSMUSG00000103887 | -3.55 | 3.42E-04 | Gm37008       | TEC | 2.85 | 3.52 | 3.93 | 2.94 | 2.00 | 2.00 | 2.00 | 2.62 |
| Down | ENSMUSG00000109656 | -3.01 | 3.42E-04 | Gm45548       | TEC | 3.31 | 3.03 | 2.54 | 3.27 | 2.00 | 2.00 | 2.00 | 2.62 |
| Down | ENSMUSG00000104170 | -2.43 | 3.44E-04 | Gm37702       | TEC | 3.38 | 3.03 | 2.93 | 2.94 | 2.25 | 2.00 | 2.00 | 2.70 |
| Down | ENSMUSG00000107054 | -2.71 | 3.45E-04 | C730045M19Rik | TEC | 2.54 | 3.52 | 3.80 | 3.45 | 2.13 | 2.92 | 2.00 | 2.00 |
| Down | ENSMUSG00000108216 | -1.88 | 3.49E-04 | Gm44153       | TEC | 3.50 | 2.76 | 3.49 | 3.86 | 2.00 | 3.22 | 2.00 | 2.62 |
| Down | ENSMUSG00000105261 | -5.69 | 3.61E-04 | Gm43333       | TEC | 3.10 | 3.11 | 2.64 | 2.69 | 2.00 | 2.00 | 2.00 | 2.00 |
| Down | ENSMUSG00000102496 | -2.29 | 3.74E-04 | Gm36989       | TEC | 3.31 | 4.53 | 4.27 | 4.34 | 2.13 | 2.53 | 2.24 | 3.66 |
| Down | ENSMUSG00000110689 | -1.96 | 3.77E-04 | Gm45731       | TEC | 3.61 | 2.95 | 3.30 | 3.39 | 3.04 | 2.62 | 2.00 | 2.00 |
| Down | ENSMUS             |       |          |               |     |      |      |      |      |      |      |      |      |

|      |                    |       |          |               |     |      |      |      |      |      |      |      |      |
|------|--------------------|-------|----------|---------------|-----|------|------|------|------|------|------|------|------|
| Down | ENSMUSG00000108108 | -4.74 | 3.93E-04 | Gm44270       | TEC | 2.43 | 2.66 | 2.84 | 2.14 | 2.00 | 2.00 | 2.00 | 2.00 |
| Down | ENSMUSG00000112090 | -4.44 | 3.93E-04 | Gm48231       | TEC | 2.75 | 2.76 | 3.23 | 3.15 | 2.00 | 2.00 | 2.00 | 2.24 |
| Down | ENSMUSG00000106364 | -4.40 | 3.94E-04 | Gm42994       | TEC | 2.43 | 2.95 | 2.93 | 2.27 | 2.00 | 2.12 | 2.00 | 2.00 |
| Down | ENSMUSG00000105707 | -1.92 | 4.00E-04 | Gm43753       | TEC | 3.56 | 3.26 | 2.84 | 3.08 | 2.74 | 2.00 | 2.00 | 2.78 |
| Down | ENSMUSG00000104094 | -1.70 | 4.05E-04 | Gm37314       | TEC | 3.31 | 3.73 | 3.43 | 4.39 | 3.22 | 2.00 | 2.00 | 2.85 |
| Down | ENSMUSG00000114817 | -2.49 | 4.06E-04 | Gm48356       | TEC | 3.77 | 3.68 | 3.30 | 3.08 | 2.25 | 2.34 | 2.00 | 2.65 |
| Down | ENSMUSG00000112256 | -2.20 | 4.19E-04 | Gm48014       | TEC | 2.94 | 2.94 | 2.00 | 3.15 | 2.00 | 2.00 | 2.70 | 2.70 |
| Down | ENSMUSG00000102448 | -1.96 | 4.20E-04 | Gm37101       | TEC | 3.50 | 4.27 | 3.97 | 2.82 | 2.00 | 3.82 | 2.00 | 2.78 |
| Down | ENSMUSG00000102939 | -2.63 | 4.21E-04 | Gm38111       | TEC | 2.94 | 3.39 | 3.75 | 3.21 | 2.00 | 2.00 | 2.93 | 2.12 |
| Down | ENSMUSG00000108689 | -2.16 | 4.29E-04 | Gm45354       | TEC | 2.85 | 3.11 | 3.84 | 3.15 | 2.66 | 2.12 | 2.24 | 2.54 |
| Down | ENSMUSG00000099893 | -1.80 | 4.30E-04 | Gm29245       | TEC | 2.94 | 3.68 | 2.54 | 3.50 | 2.00 | 2.34 | 2.79 | 2.62 |
| Down | ENSMUSG00000109387 | -2.38 | 4.44E-04 | Gm45182       | TEC | 4.15 | 4.41 | 4.57 | 4.34 | 2.90 | 2.12 | 3.71 | 2.00 |
| Down | ENSMUSG00000106706 | -2.25 | 4.45E-04 | C530043K16Rik | TEC | 2.94 | 3.39 | 3.16 | 3.69 | 2.00 | 3.05 | 2.00 | 2.24 |
| Down | ENSMUSG00000107195 | -2.45 | 4.54E-04 | 4930589O11Rik | TEC | 3.25 | 3.03 | 3.23 | 3.15 | 2.00 | 2.34 | 2.45 | 2.34 |
| Down | ENSMUSG00000113812 | -4.79 | 4.57E-04 | Gm48699       | TEC | 2.00 | 2.55 | 2.74 | 2.77 | 2.00 | 2.00 | 2.00 | 2.00 |
| Down | ENSMUSG00000105877 | -4.25 | 4.70E-04 | Gm42479       | TEC | 2.54 | 2.95 | 2.29 | 2.59 | 2.00 | 2.00 | 2.12 | 2.00 |
| Down | ENSMUSG00000102289 | -2.62 | 4.81E-04 | Gm31258       | TEC | 4.26 | 3.57 | 3.80 | 4.02 | 2.82 | 2.00 | 2.00 | 2.70 |
| Down | ENSMUSG00000103420 | -3.55 | 4.87E-04 | Gm37537       | TEC | 3.25 | 2.86 | 2.15 | 2.94 | 2.24 | 2.00 | 2.12 | 2.00 |
| Down | ENSMUSG00000107655 | -1.93 | 4.87E-04 | Gm44220       | TEC | 3.95 | 3.92 | 4.27 | 4.22 | 2.47 | 3.22 | 2.45 | 3.23 |
| Down | ENSMUSG00000102172 | -4.15 | 4.93E-04 | Gm37873       | TEC | 2.85 | 4.01 | 2.54 | 2.59 | 2.00 | 2.00 | 2.00 | 2.34 |
| Down | ENSMUSG00000110529 | -1.16 | 4.93E-04 | Gm45694       | TEC | 3.99 | 4.34 | 4.54 | 3.23 | 3.47 | 3.54 | 3.48 | 3.54 |
| Down | ENSMUSG00000103220 | -1.74 | 4.99E-04 | Gm37728       | TEC | 3.02 | 4.20 | 4.70 | 3.86 | 2.37 | 2.92 | 2.86 | 3.48 |
| Down | ENSMUSG00000105520 | -4.01 | 5.08E-04 | Gm42837       | TEC | 3.10 | 2.86 | 3.09 | 3.21 | 2.00 | 3.24 | 2.13 | 2.24 |
| Down | ENSMUSG00000104325 | -2.23 | 5.08E-04 | Gm37321       | TEC | 3.25 | 3.78 | 2.64 | 3.15 | 2.25 | 2.78 | 2.00 | 2.34 |
| Up   | ENSMUSG00000106834 | 1.50  | 5.18E-04 | Gm10459       | TEC | 4.22 | 4.37 | 4.40 | 4.48 | 4.82 | 6.10 | 5.59 | 5.88 |
| Down | ENSMUSG00000108522 | -1.97 | 5.19E-04 | Gm44664       | TEC | 3.18 | 3.03 | 3.16 | 3.08 | 2.37 | 2.53 | 2.00 | 2.54 |
| Down | ENSMUSG00000106244 | -1.87 | 5.25E-04 | Gm43046       | TEC | 3.10 | 3.46 | 4.24 | 4.15 | 2.57 | 2.00 | 3.50 | 2.54 |
| Down | ENSMUSG00000107531 | -3.05 | 5.41E-04 | E330037G11Rik | TEC | 3.02 | 3.33 | 2.54 | 2.86 | 2.00 | 2.45 | 2.00 | 2.12 |
| Down | ENSMUSG00000113045 | -2.25 | 5.53E-04 | Gm48621       | TEC | 3.67 | 3.57 | 3.54 | 4.12 | 3.33 | 2.00 | 2.54 | 2.54 |
| Down | ENSMUSG00000112197 | -2.25 | 5.59E-04 | Gm47337       | TEC | 3.50 | 3.92 | 3.54 | 2.86 | 2.00 | 2.78 | 2.00 | 2.85 |
| Down | ENSMUSG00000103543 | -4.78 | 5.60E-04 | Gm37669       | TEC | 2.16 | 2.55 | 2.42 | 2.00 | 2.94 | 2.00 | 2.00 | 2.00 |
| Down | ENSMUSG00000103945 | -2.50 | 5.68E-04 | Gm38228       | TEC | 2.75 | 3.63 | 3.01 | 4.12 | 2.12 | 2.00 | 3.12 | 2.00 |
| Down | ENSMUSG00000106073 | -3.91 | 5.77E-04 | Gm44875       | TEC | 3.11 | 3.11 | 2.54 | 3.55 | 2.12 | 2.12 | 2.00 | 3.12 |
| Down | ENSMUSG00000108912 | -2.22 | 5.77E-04 | Gm43785       | TEC | 3.18 | 3.39 | 3.16 | 2.69 | 2.00 | 2.57 | 2.00 | 2.62 |
| Down | ENSMUSG00000107835 | -2.04 | 5.90E-04 | Gm43999       | TEC | 2.30 | 3.57 | 3.36 | 3.08 | 2.25 | 2.92 | 2.00 | 2.12 |
| Down | ENSMUSG00000110903 | -2.44 | 5.94E-04 | Gm47857       | TEC | 3.02 | 3.33 | 3.49 | 3.82 | 2.00 | 2.53 | 2.13 | 2.78 |
| Down | ENSMUSG00000102257 | -2.68 | 5.96E-04 | Gm37649       | TEC | 3.44 | 3.26 | 3.16 | 2.94 | 2.00 | 2.34 | 2.00 | 2.62 |
| Down | ENSMUSG00000111254 | -1.79 | 6.03E-04 | Gm48717       | TEC | 3.10 | 3.33 | 3.65 | 3.78 | 2.00 | 3.30 | 2.70 | 2.70 |
| Down | ENSMUSG00000109332 | -2.99 | 6.11E-04 | Gm44742       | TEC | 2.43 | 3.19 | 3.09 | 2.94 | 2.37 | 2.12 | 2.00 | 2.12 |
| Down | ENSMUSG00000105500 | -4.51 | 6.12E-04 | Gm42591       | TEC | 2.43 | 2.16 | 2.54 | 2.69 | 2.00 | 2.00 | 2.00 | 2.00 |
| Down | ENSMUSG00000102664 | -1.83 | 6.12E-04 | Gm38380       | TEC | 2.54 | 3.46 | 3.23 | 3.39 | 2.00 | 2.62 | 2.00 | 2.92 |
| Down | ENSMUSG00000112309 | -4.33 | 6.25E-04 | Gm48353       | TEC | 2.85 | 2.95 | 2.15 | 2.49 | 2.13 | 2.00 | 2.00 | 2.00 |
| Down | ENSMUSG00000104641 | -2.41 | 6.36E-04 | Gm43290       | TEC | 2.54 | 3.33 | 4.05 | 3.86 | 2.00 | 3.07 | 2.00 | 2.44 |
| Down | ENSMUSG00000110160 | -2.50 | 6.37E-04 | Gm45560       | TEC | 3.38 | 2.43 | 3.36 | 3.39 | 2.13 | 2.00 | 2.35 | 2.62 |
| Down | ENSMUSG00000104221 | -2.87 | 6.39E-04 | Gm37051       | TEC | 2.54 | 2.86 | 3.54 | 2.86 | 2.00 | 2.00 | 2.00 | 2.62 |
| Down | ENSMUSG00000109317 | -2.36 | 6.39E-04 | Gm44663       | TEC | 3.25 | 3.26 | 3.16 | 4.15 | 2.25 | 2.00 | 2.00 | 3.17 |
| Down | ENSMUSG00000104928 | -3.45 | 6.55E-04 | Gm42998       | TEC | 3.45 | 2.94 | 2.76 | 2.74 | 2.94 | 2.13 | 2.00 | 2.00 |
| Down | ENSMUSG00000109245 | -1.91 | 6.66E-04 | Gm44860       | TEC | 4.48 | 4.64 | 4.57 | 3.82 | 3.87 | 2.63 | 2.24 | 2.24 |
| Down | ENSMUSG00000110758 | -3.99 | 6.66E-04 | Gm48092       | TEC | 2.94 | 3.03 | 2.42 | 3.60 | 2.00 | 2.00 | 2.00 | 2.34 |
| Down | ENSMUSG00000114617 | -1.66 | 6.68E-04 | Gm48766       | TEC | 3.61 | 3.52 | 3.36 | 3.82 | 2.00 | 2.85 | 3.24 | 2.44 |
| Down | ENSMUSG00000108630 | -4.29 | 6.70E-04 | Gm44607       | TEC | 3.18 | 2.86 | 3.16 | 2.38 | 2.25 | 2.00 | 2.00 | 2.00 |
| Down | ENSMUSG00000103422 | -2.35 | 6.73E-04 | Gm37536       | TEC | 3.10 | 3.19 | 3.65 | 3.55 | 2.00 | 2.12 | 2.00 | 3.12 |
| Down | ENSMUSG00000103522 | -2.54 | 6.74E-04 | 9430087J23Rik | TEC | 2.43 | 2.76 | 3.16 | 2.94 | 2.47 | 2.00 | 2.00 | 2.24 |
| Down | ENSMUSG00000104282 | -5.91 | 6.80E-04 | Gm37460       | TEC | 3.10 | 3.11 | 3.09 | 2.69 | 2.00 | 2.00 | 2.00 | 2.00 |
| Down | ENSMUSG00000111951 | -4.46 | 6.86E-04 | Gm48755       | TEC | 3.50 | 3.11 | 2.42 | 2.13 | 2.12 | 2.00 | 2.00 | 2.00 |
| Down | ENSMUSG00000108076 | -3.44 | 6.92E-04 | 9530086O07Rik | TEC | 2.30 | 2.43 | 3.09 | 3.15 | 2.13 | 2.24 | 2.00 | 2.00 |
| Down | ENSMUSG00000102276 | -4.39 | 7.01E-04 | 2900069G24Rik | TEC | 2.00 | 3.03 | 2.64 | 2.00 | 2.77 | 2.00 | 2.00 | 2.00 |
| Down | ENSMUSG00000105119 | -3.49 | 7.03E-04 | Gm43765       | TEC | 2.00 | 2.86 | 3.09 | 3.08 | 2.00 | 2.00 | 2.00 | 2.00 |
| Down | ENSMUSG00000106205 | -1.48 | 7.18E-04 | C230096K16Rik | TEC | 4.03 | 4.41 | 3.65 | 3.74 | 3.35 | 2.70 | 3.00 | 3.06 |
| Down | ENSMUSG00000112900 | -3.58 | 7.38E-04 | Gm48204       | TEC | 3.18 | 2.66 | 2.64 | 3.55 | 2.00 | 2.00 | 2.44 | 2.44 |
| Down | ENSMUSG00000108152 | -1.29 | 7.46E-04 | Gm44152       | TEC | 2.94 | 2.95 | 2.84 | 3.15 | 2.25 | 2.00 | 2.00 | 2.70 |
| Down | ENSMUSG00000091272 | -1.29 | 7.49E-04 | Gm17641       | TEC | 4.75 | 4.24 | 4.52 | 4.39 | 3.81 | 3.22 | 3.07 | 3.85 |
| Down | ENSMUSG00000115155 | -3.80 | 7.58E-04 | Gm49182       | TEC | 3.02 | 2.55 | 2.93 | 3.27 | 2.13 | 2.00 | 2.00 | 2.24 |
| Down | ENSMUSG00000116766 | -3.34 | 7.59E-04 | Gm49702       | TEC | 3.10 | 2.76 | 2.74 | 2.38 | 2.00 | 2.00 | 2.35 | 2.00 |
| Down | ENSMUSG00000102322 | -4.30 | 7.60E-04 | 4930566N20Rik | TEC | 2.00 | 2.66 | 2.15 | 2.69 | 2.00 | 2.00 | 2.00 | 2.00 |
| Down | ENSMUSG00000102324 | -1.59 | 7.60E-04 | Gm19721       | TEC | 3.38 | 3.92 | 4.24 | 3.74 | 2.66 | 2.12 | 3.13 | 3.39 |
| Down | ENSMUSG00000106048 | -2.41 | 7.82E-04 | Gm42444       | TEC | 2.43 | 3.46 | 3.01 | 3.45 | 2.00 | 2.00 | 2.24 | 2.78 |
| Down | ENSMUSG00000108214 | -2.35 | 7.94E-04 | Gm43982       | TEC | 2.85 | 3.26 | 3.23 | 3.08 | 2.25 | 2.00 | 2.00 | 2.78 |
| Down | ENSMUSG00000109622 | -4.57 | 8.06E-04 | Gm45517       | TEC | 2.54 | 2.30 | 3.60 | 3.39 | 2.25 | 2.00 | 2.00 | 2.00 |
| Down | ENSMUSG00000103632 | -4.96 | 8.11E-04 | Gm38329       | TEC | 2.30 | 3.46 | 2.64 | 2.94 | 2.00 | 2.00 | 2.12 | 2.00 |
| Down | ENSMUSG00000113196 | -2.16 | 8.34E-04 | D230049E03Rik | TEC | 4.77 | 3.92 | 3.60 | 4.77 | 2.85 | 3.75 | 2.34 | 2.34 |
| Down | ENSMUSG00000104873 | -4.91 | 8.59E-04 | Gm40332       | TEC | 3.50 | 2.55 | 2.54 | 2.69 | 2.00 | 2.00 | 2.12 | 2.00 |
| Down | ENSMUSG00000102225 | -2.32 | 8.67E-04 | Gm37983       | TEC | 2.43 | 3.26 | 2.74 | 2.43 | 2.00 | 2.44 | 2.00 | 2.35 |
| Down | ENSMUSG00000107913 | 4.08  | 8.72E-04 | Gm48711       | TEC | 3.02 | 2.16 | 2.63 | 2.13 | 2.00 | 2.12 | 2.00 | 2.12 |
| Down | ENSMUSG00000107529 | -1.51 | 8.78E-04 | Gm44291       | TEC | 3.10 | 3.57 | 3.30 | 3.55 | 2.82 | 2.12 | 3.00 | 2.54 |
| Down | ENSMUSG00000113776 | -1.98 | 8.87E-04 | Gm19327       | TEC | 3.10 | 3.57 | 3.36 | 3.65 | 2.37 | 2.00 | 2.45 | 2.54 |
| Down | ENSMUSG00000103622 | -1.33 | 8.87E-04 | Gm38391       | TEC | 4.77 | 4.47 | 4.75 | 5.04 | 3.65 | 4.19 | 3.55 | 2.54 |
| Down | ENSMUSG00000107620 | -3.23 | 8.89E-04 | Gm44256       | TEC | 3.10 | 2.55 | 2.74 | 3.08 | 2.00 | 2.44 | 2.00 | 2.00 |
| Down | ENSMUSG00000104735 | -2.10 | 9.11E-04 | C130075A20Rik | TEC | 2.85 | 3.26 | 3.23 | 3.33 | 2.70 | 2.00 | 2.00 | 2.62 |
| Down | ENSMUSG00000102935 | -3.49 | 9.16E-04 | Gm38355       | TEC | 2.43 | 3.46 | 2.93 | 3.08 | 2.00 | 2.12 | 2.00 | 2.34 |
| Down | ENSMUSG00000115318 | -6.07 | 9.18E-04 | Gm49089       | TEC | 3.50 | 2.43 | 3.16 | 3.08 | 2.00 | 2.00 | 2.00 | 2.00 |
| Down | ENSMUSG00000105466 | -2.88 | 9.23E-04 | Gm42998       | TEC | 2.94 | 3.26 | 2.74 | 3.45 | 2.13 | 2.12 | 2.24 | 2.34 |
| Down | ENSMUSG00000108850 | -1.62 | 9.24E-04 | Gm44914       | TEC | 3.10 | 2.95 | 3.60 | 3.15 | 2.00 | 2.92 | 2.71 | 2.24 |
| Down | ENSMUSG00000102844 | -2.22 | 9.35E-04 | Gm38034       | TEC | 2.54 | 2.86 | 3.93 | 3.27 | 2.00 | 2.00 | 2.63 | 2.00 |
| Down | ENSMUSG00000104562 | -4.31 | 9.37E-04 | Gm42767       | TEC | 2.00 | 2.95 | 3.43 | 3.01 | 2.00 | 2.00 | 2.24 | 2.24 |
| Down | ENSMUSG00000102733 | -4.40 | 9.48E-04 | Gm38262       | TEC | 2.00 | 2.16 | 2.74 | 2.69 | 2.00 | 2.00 | 2.00 | 2.0  |

|      |                    |       |          |               |     |      |      |      |      |      |      |      |      |
|------|--------------------|-------|----------|---------------|-----|------|------|------|------|------|------|------|------|
| Down | ENSMUSG00000103207 | -2.19 | 9.98E-04 | Gm9874        | TEC | 2.75 | 3.19 | 3.60 | 2.69 | 2.00 | 2.34 | 2.00 | 2.78 |
| Down | ENSMUSG00000109652 | -1.38 | 1.00E-03 | Gm45555       | TEC | 3.72 | 4.20 | 4.63 | 3.74 | 3.73 | 3.11 | 2.13 | 3.39 |
| Down | ENSMUSG00000113154 | -2.49 | 1.01E-03 | Gm48713       | TEC | 2.65 | 3.19 | 3.23 | 2.49 | 2.00 | 2.34 | 2.00 | 2.44 |
| Up   | ENSMUSG00000108466 | 1.26  | 1.02E-03 | Gm44771       | TEC | 4.51 | 4.58 | 3.70 | 4.22 | 4.76 | 5.88 | 5.66 | 4.83 |
| Down | ENSMUSG00000106603 | -2.32 | 1.02E-03 | Gm43509       | TEC | 2.75 | 2.66 | 3.89 | 3.01 | 2.00 | 2.53 | 2.00 | 2.61 |
| Down | ENSMUSG00000108143 | -2.71 | 1.03E-03 | Gm44414       | TEC | 3.02 | 3.39 | 3.23 | 4.22 | 2.00 | 2.62 | 2.35 | 2.44 |
| Down | ENSMUSG00000102650 | -2.03 | 1.03E-03 | Gm19983       | TEC | 3.50 | 4.34 | 3.97 | 3.55 | 2.37 | 2.00 | 2.54 | 2.44 |
| Down | ENSMUSG00000108264 | -3.19 | 1.04E-03 | Gm20371       | TEC | 2.54 | 3.52 | 2.29 | 3.39 | 2.00 | 2.00 | 2.45 | 2.12 |
| Down | ENSMUSG00000108155 | -1.60 | 1.04E-03 | Gm44443       | TEC | 3.99 | 4.47 | 4.05 | 4.37 | 3.81 | 3.05 | 2.00 | 3.23 |
| Down | ENSMUSG00000110282 | -1.34 | 1.06E-03 | B930086L07Rik | TEC | 3.77 | 3.78 | 3.89 | 3.78 | 2.82 | 2.92 | 3.00 | 3.17 |
| Down | ENSMUSG00000106994 | -1.87 | 1.08E-03 | Gm10829       | TEC | 3.18 | 3.46 | 2.93 | 3.08 | 2.00 | 2.00 | 2.86 | 2.62 |
| Down | ENSMUSG00000106729 | -2.48 | 1.09E-03 | Gm43165       | TEC | 2.75 | 3.33 | 3.60 | 2.49 | 2.00 | 2.00 | 2.79 | 2.12 |
| Down | ENSMUSG00000110137 | -5.34 | 1.10E-03 | Gm45577       | TEC | 2.30 | 2.95 | 3.49 | 3.33 | 2.00 | 2.00 | 2.00 | 2.12 |
| Down | ENSMUSG00000116707 | -4.14 | 1.10E-03 | Gm49590       | TEC | 2.16 | 2.30 | 2.54 | 3.08 | 2.00 | 2.00 | 2.00 | 2.12 |
| Down | ENSMUSG00000108067 | -1.86 | 1.10E-03 | Gm43953       | TEC | 3.10 | 2.66 | 3.09 | 3.08 | 2.00 | 2.92 | 2.00 | 2.24 |
| Down | ENSMUSG00000108455 | -1.70 | 1.10E-03 | Gm44745       | TEC | 3.61 | 3.46 | 3.16 | 2.94 | 2.00 | 3.17 | 2.00 | 2.62 |
| Down | ENSMUSG00000107414 | -2.65 | 1.11E-03 | 6330419E04Rik | TEC | 3.50 | 3.03 | 3.16 | 3.01 | 2.00 | 2.78 | 2.00 | 2.12 |
| Down | ENSMUSG00000108753 | -1.99 | 1.11E-03 | Gm45094       | TEC | 3.77 | 2.86 | 3.16 | 3.45 | 2.47 | 2.34 | 2.71 | 2.34 |
| Down | ENSMUSG00000103060 | -3.85 | 1.12E-03 | Gm36969       | TEC | 2.85 | 2.86 | 3.01 | 3.21 | 2.00 | 2.00 | 2.00 | 2.34 |
| Down | ENSMUSG00000104100 | -2.13 | 1.13E-03 | Gm37860       | TEC | 4.11 | 3.88 | 3.80 | 4.12 | 2.00 | 3.28 | 2.00 | 3.17 |
| Down | ENSMUSG00000103360 | -3.22 | 1.14E-03 | Gm38156       | TEC | 2.86 | 2.86 | 2.64 | 3.78 | 2.00 | 2.37 | 2.00 | 2.24 |
| Down | ENSMUSG00000108169 | -3.24 | 1.15E-03 | Gm43958       | TEC | 2.85 | 3.03 | 3.30 | 3.50 | 2.00 | 2.44 | 2.00 | 2.24 |
| Down | ENSMUSG00000107947 | -1.84 | 1.15E-03 | Gm44438       | TEC | 3.31 | 3.19 | 3.70 | 3.78 | 2.47 | 3.28 | 2.00 | 2.34 |
| Down | ENSMUSG00000115264 | -4.63 | 1.17E-03 | Gm49260       | TEC | 2.30 | 2.55 | 2.74 | 2.38 | 2.00 | 2.00 | 2.00 | 2.00 |
| Down | ENSMUSG00000103132 | -1.85 | 1.17E-03 | Gm37978       | TEC | 3.50 | 2.76 | 3.16 | 3.33 | 2.90 | 2.53 | 2.00 | 2.24 |
| Down | ENSMUSG00000104662 | -2.73 | 1.20E-03 | Gm43267       | TEC | 3.67 | 3.46 | 3.43 | 3.82 | 3.17 | 2.00 | 2.00 | 2.00 |
| Down | ENSMUSG00000106536 | -1.58 | 1.21E-03 | Gm42508       | TEC | 3.56 | 3.57 | 3.89 | 3.08 | 2.90 | 2.12 | 2.93 | 2.78 |
| Down | ENSMUSG00000109452 | -2.14 | 1.22E-03 | Gm44530       | TEC | 3.31 | 2.95 | 4.24 | 3.90 | 2.90 | 2.44 | 2.00 | 2.85 |
| Down | ENSMUSG00000114896 | -1.97 | 1.23E-03 | Gm34245       | TEC | 3.10 | 3.39 | 3.30 | 3.50 | 2.00 | 2.71 | 2.00 | 2.92 |
| Down | ENSMUSG00000106290 | -4.98 | 1.24E-03 | Gm43429       | TEC | 2.94 | 2.76 | 2.64 | 3.21 | 2.00 | 2.12 | 2.00 | 2.00 |
| Down | ENSMUSG00000107676 | -4.90 | 1.24E-03 | Gm44178       | TEC | 2.54 | 2.86 | 3.09 | 2.94 | 2.00 | 2.12 | 2.00 | 2.00 |
| Down | ENSMUSG00000105454 | -4.43 | 1.25E-03 | Gm43930       | TEC | 2.54 | 2.55 | 2.42 | 2.27 | 2.00 | 2.00 | 2.00 | 2.00 |
| Down | ENSMUSG00000112075 | -4.09 | 1.25E-03 | Gm47700       | TEC | 2.94 | 2.94 | 3.43 | 3.09 | 2.00 | 2.00 | 2.13 | 2.24 |
| Down | ENSMUSG00000102750 | -3.03 | 1.25E-03 | Gm37058       | TEC | 2.43 | 2.43 | 3.36 | 2.77 | 2.00 | 2.12 | 2.00 | 2.12 |
| Down | ENSMUSG00000106579 | -2.13 | 1.25E-03 | Gm42771       | TEC | 3.18 | 3.11 | 3.65 | 3.27 | 2.00 | 2.00 | 3.00 | 2.44 |
| Down | ENSMUSG00000105742 | -1.93 | 1.26E-03 | Gm42748       | TEC | 3.10 | 3.52 | 3.70 | 3.60 | 2.00 | 3.07 | 2.00 | 2.70 |
| Down | ENSMUSG00000107200 | -1.82 | 1.26E-03 | Gm43039       | TEC | 4.32 | 3.46 | 4.13 | 3.60 | 3.35 | 2.00 | 3.24 | 2.34 |
| Down | ENSMUSG00000103307 | -5.78 | 1.27E-03 | Gm19335       | TEC | 2.85 | 3.11 | 3.09 | 2.69 | 2.00 | 2.00 | 2.00 | 2.00 |
| Down | ENSMUSG00000112759 | -4.40 | 1.27E-03 | Gm47615       | TEC | 2.65 | 2.00 | 2.29 | 2.69 | 2.00 | 2.00 | 2.00 | 2.00 |
| Down | ENSMUSG00000109648 | -1.42 | 1.27E-03 | Svet1         | TEC | 3.61 | 3.57 | 3.75 | 3.94 | 2.66 | 2.78 | 2.63 | 3.39 |
| Down | ENSMUSG00000105762 | -2.33 | 1.28E-03 | Gm43605       | TEC | 3.38 | 3.57 | 3.49 | 3.94 | 2.00 | 2.00 | 2.54 | 3.12 |
| Down | ENSMUSG00000105586 | -2.15 | 1.29E-03 | Gm43009       | TEC | 2.54 | 3.11 | 3.30 | 3.45 | 2.00 | 2.62 | 2.00 | 2.54 |
| Down | ENSMUSG00000104018 | -1.83 | 1.31E-03 | 4833412K13Rik | TEC | 3.50 | 3.57 | 3.43 | 3.86 | 2.74 | 2.34 | 2.00 | 3.23 |
| Down | ENSMUSG00000102542 | -5.34 | 1.34E-03 | Gm38133       | TEC | 3.25 | 3.39 | 2.93 | 2.69 | 2.00 | 2.00 | 2.00 | 2.00 |
| Down | ENSMUSG00000102618 | -1.40 | 1.36E-03 | Gm37848       | TEC | 3.96 | 3.97 | 3.54 | 3.65 | 2.00 | 3.38 | 3.07 | 2.70 |
| Down | ENSMUSG00000104342 | -3.04 | 1.38E-03 | Gm36401       | TEC | 2.43 | 2.95 | 3.23 | 3.08 | 2.00 | 2.00 | 2.35 | 2.24 |
| Down | ENSMUSG00000103199 | -2.90 | 1.39E-03 | Gm37648       | TEC | 2.43 | 2.43 | 3.09 | 2.12 | 2.00 | 2.12 | 2.00 | 2.34 |
| Down | ENSMUSG00000103482 | -1.73 | 1.39E-03 | Gm37999       | TEC | 2.94 | 2.95 | 3.36 | 3.45 | 2.57 | 2.00 | 2.00 | 3.06 |
| Down | ENSMUSG00000108953 | -1.72 | 1.39E-03 | Gm45129       | TEC | 3.50 | 3.73 | 3.93 | 3.15 | 3.17 | 3.11 | 2.00 | 2.12 |
| Down | ENSMUSG00000102344 | -1.31 | 1.39E-03 | 9430053O09Rik | TEC | 4.72 | 5.15 | 5.22 | 4.96 | 3.96 | 4.30 | 4.22 | 3.06 |
| Down | ENSMUSG00000102325 | -3.74 | 1.42E-03 | Gm37789       | TEC | 3.18 | 3.52 | 3.09 | 4.02 | 2.00 | 2.00 | 2.35 | 2.34 |
| Down | ENSMUSG00000105517 | -1.92 | 1.42E-03 | Gm42436       | TEC | 3.61 | 3.19 | 4.01 | 4.12 | 3.11 | 2.98 | 2.00 | 2.54 |
| Down | ENSMUSG00000103591 | -1.91 | 1.44E-03 | Gm38365       | TEC | 3.25 | 3.03 | 2.93 | 2.86 | 2.00 | 2.78 | 2.00 | 2.44 |
| Down | ENSMUSG00000102236 | -5.63 | 1.45E-03 | Gm37887       | TEC | 2.75 | 2.66 | 3.30 | 2.69 | 2.00 | 2.00 | 2.00 | 2.00 |
| Down | ENSMUSG00000108474 | -4.47 | 1.45E-03 | Gm44895       | TEC | 3.56 | 3.19 | 2.42 | 2.59 | 2.00 | 2.00 | 2.00 | 2.24 |
| Down | ENSMUSG00000108633 | -4.28 | 1.45E-03 | Gm44694       | TEC | 2.54 | 2.95 | 3.36 | 2.69 | 2.00 | 2.00 | 2.00 | 2.00 |
| Down | ENSMUSG00000108053 | -2.43 | 1.47E-03 | Gm43890       | TEC | 3.50 | 3.57 | 2.93 | 3.39 | 2.00 | 2.70 | 2.00 | 2.24 |
| Down | ENSMUSG00000111424 | -2.50 | 1.50E-03 | Gm48478       | TEC | 3.18 | 3.39 | 2.42 | 3.27 | 2.37 | 2.44 | 2.13 | 2.12 |
| Down | ENSMUSG00000107199 | -4.24 | 1.53E-03 | Gm42550       | TEC | 2.00 | 2.55 | 3.09 | 2.59 | 2.00 | 2.00 | 2.00 | 2.12 |
| Down | ENSMUSG00000109079 | -3.62 | 1.55E-03 | Gm44755       | TEC | 2.75 | 3.52 | 2.64 | 3.08 | 2.00 | 2.44 | 2.00 | 2.00 |
| Down | ENSMUSG00000102856 | -2.75 | 1.56E-03 | Gm37084       | TEC | 3.31 | 4.50 | 4.24 | 3.98 | 2.00 | 2.00 | 2.24 | 3.44 |
| Down | ENSMUSG00000109874 | -3.98 | 1.58E-03 | Gm9911        | TEC | 3.44 | 2.95 | 3.01 | 2.69 | 2.00 | 2.00 | 2.00 | 2.34 |
| Down | ENSMUSG00000104174 | -5.21 | 1.60E-03 | Gm37701       | TEC | 2.85 | 2.95 | 2.64 | 2.27 | 2.00 | 2.00 | 2.00 | 2.00 |
| Down | ENSMUSG00000108640 | -2.99 | 1.60E-03 | Gm44508       | TEC | 2.85 | 3.03 | 2.42 | 3.27 | 2.00 | 2.00 | 2.00 | 2.54 |
| Down | ENSMUSG00000110504 | -2.14 | 1.60E-03 | Gm45797       | TEC | 3.18 | 3.57 | 2.74 | 3.27 | 3.04 | 2.00 | 2.00 | 2.24 |
| Down | ENSMUSG00000115674 | -1.79 | 1.63E-03 | Gm49297       | TEC | 3.02 | 3.11 | 3.36 | 3.39 | 2.90 | 2.12 | 2.13 | 2.62 |
| Down | ENSMUSG00000113432 | -1.94 | 1.64E-03 | 8430406P12Rik | TEC | 2.65 | 3.52 | 2.74 | 3.08 | 2.25 | 2.34 | 2.00 | 2.70 |
| Down | ENSMUSG00000106673 | -4.90 | 1.65E-03 | Gm43374       | TEC | 2.43 | 2.55 | 3.01 | 2.27 | 2.00 | 2.00 | 2.00 | 2.00 |
| Down | ENSMUSG00000108897 | -2.14 | 1.66E-03 | Gm44861       | TEC | 3.31 | 4.20 | 3.54 | 3.82 | 2.00 | 2.62 | 2.00 | 3.39 |
| Down | ENSMUSG00000108376 | -3.23 | 1.68E-03 | Gm44874       | TEC | 2.94 | 2.76 | 2.93 | 2.14 | 2.00 | 2.00 | 2.00 | 2.24 |
| Down | ENSMUSG00000103834 | -2.93 | 1.68E-03 | Gm37613       | TEC | 2.30 | 3.46 | 3.09 | 3.45 | 2.00 | 2.00 | 2.00 | 2.00 |
| Down | ENSMUSG00000102449 | -4.52 | 1.70E-03 | Gm37100       | TEC | 2.00 | 2.43 | 2.84 | 2.49 | 2.00 | 2.00 | 2.00 | 2.70 |
| Down | ENSMUSG00000105903 | -1.60 | 1.72E-03 | Gm45236       | TEC | 2.43 | 3.57 | 3.75 | 3.23 | 2.44 | 2.12 | 2.45 | 2.44 |
| Down | ENSMUSG00000110405 | 2.80  | 1.74E-03 | Gm45534       | TEC | 2.43 | 2.86 | 2.64 | 3.27 | 2.00 | 2.54 | 2.00 | 2.00 |
| Down | ENSMUSG00000103404 | -3.20 | 1.75E-03 | Gm37932       | TEC | 3.02 | 3.33 | 3.23 | 3.08 | 2.00 | 2.00 | 2.00 | 2.62 |
| Down | ENSMUSG00000107128 | -3.90 | 1.77E-03 | Gm42867       | TEC | 2.16 | 2.55 | 2.84 | 3.21 | 2.00 | 2.00 | 2.00 | 2.24 |
| Down | ENSMUSG00000106855 | -4.13 | 1.80E-03 | 5330437M03Rik | TEC | 2.65 | 2.30 | 3.54 | 3.60 | 2.00 | 2.00 | 2.00 | 2.34 |
| Down | ENSMUSG00000106158 | -1.85 | 1.80E-03 | Gm43216       | TEC | 3.31 | 3.52 | 3.01 | 2.94 | 2.25 | 3.11 | 2.00 | 2.12 |
| Down | ENSMUSG00000108943 | -1.80 | 1.80E-03 | Gm44559       | TEC | 3.44 | 2.86 | 3.65 | 4.15 | 2.13 | 3.38 | 2.00 | 2.70 |
| Down | ENSMUSG00000106450 | -3.34 | 1.81E-03 | Gm43018       | TEC | 2.75 | 3.03 | 2.64 | 2.59 | 2.37 | 2.00 | 2.00 | 2.00 |
| Down | ENSMUSG00000102815 | -5.71 | 1.83E-03 | Gm37813       | TEC | 2.16 | 2.76 | 3.43 | 3.01 | 2.00 | 2.00 | 2.00 | 2.00 |
| Down | ENSMUSG00000106404 | -2.92 | 1.83E-03 | Gm42919       | TEC | 3.38 | 2.43 | 3.01 | 2.59 | 2.25 | 2.00 | 2.00 | 2.34 |
| Down | ENSMUSG00000103539 | -2.05 | 1.83E-03 | Gm37834       | TEC | 2.75 | 4.13 | 4.09 | 4.09 | 2.78 | 3.07 | 2.00 | 2.54 |
| Down | ENSMUSG00000106993 | -1.90 | 1.83E-03 | Gm43417       | TEC | 4.07 | 3.63 | 4.43 | 3.69 | 2.47 | 4.12 | 2.63 | 3.66 |
| Down | ENSMUSG00000103885 | -1.76 | 1.83E-03 | Gm37006       | TEC | 3.31 | 3.11 | 3.43 | 3.33 | 2.37 | 2.78 | 2.00 | 2.00 |
| Down | ENSMUSG00000110895 | -1.36 | 1.83E-03 | Gm48922       | TEC | 3.50 | 3.68 | 3.80 | 3.55 | 2.57 | 2.12 | 2.54 | 3.70 |
| Down | ENSMUSG00000       |       |          |               |     |      |      |      |      |      |      |      |      |

|      |                    |       |          |               |     |      |      |      |      |      |      |      |      |
|------|--------------------|-------|----------|---------------|-----|------|------|------|------|------|------|------|------|
| Down | ENSMUSG00000102403 | -2.27 | 1.93E-03 | Gm38187       | TEC | 3.50 | 3.39 | 4.20 | 3.98 | 2.00 | 2.44 | 2.00 | 3.44 |
| Down | ENSMUSG00000104917 | -4.32 | 1.94E-03 | Gm43289       | TEC | 2.75 | 2.30 | 2.84 | 2.59 | 2.00 | 2.00 | 2.00 | 2.12 |
| Down | ENSMUSG00000104516 | -1.87 | 1.94E-03 | Gm9884        | TEC | 3.18 | 3.19 | 3.01 | 4.02 | 2.00 | 2.53 | 2.63 | 2.85 |
| Down | ENSMUSG00000115568 | -1.40 | 1.95E-03 | TiaI2         | TEC | 3.77 | 3.46 | 4.37 | 3.50 | 3.17 | 3.65 | 2.00 | 2.54 |
| Down | ENSMUSG00000104625 | -2.59 | 1.96E-03 | Gm42448       | TEC | 2.75 | 2.30 | 3.23 | 3.01 | 2.25 | 2.00 | 2.00 | 2.44 |
| Down | ENSMUSG00000106537 | -2.36 | 1.97E-03 | Gm43502       | TEC | 2.65 | 3.11 | 3.36 | 3.50 | 2.37 | 2.70 | 2.00 | 2.12 |
| Down | ENSMUSG00000102693 | -2.87 | 1.98E-03 | 2903732Rik    | TEC | 3.54 | 3.03 | 3.26 | 2.54 | 2.38 | 2.00 | 2.00 | 2.00 |
| Down | ENSMUSG00000107971 | -2.35 | 1.98E-03 | Gm44260       | TEC | 3.02 | 3.39 | 3.01 | 3.01 | 2.37 | 2.00 | 2.63 | 2.12 |
| Down | ENSMUSG00000105958 | -2.33 | 1.99E-03 | Gm43319       | TEC | 3.31 | 2.86 | 3.16 | 3.33 | 2.25 | 2.00 | 2.54 | 2.44 |
| Down | ENSMUSG00000102581 | -2.48 | 2.00E-03 | Gm37443       | TEC | 2.94 | 3.83 | 3.89 | 4.12 | 2.00 | 3.22 | 2.00 | 2.44 |
| Down | ENSMUSG00000105347 | -2.54 | 2.01E-03 | Gm43503       | TEC | 2.75 | 3.11 | 2.84 | 3.65 | 2.25 | 2.12 | 2.00 | 2.62 |
| Down | ENSMUSG00000107690 | -3.33 | 2.02E-03 | Gm44044       | TEC | 2.75 | 2.66 | 2.54 | 3.01 | 2.00 | 2.00 | 2.35 | 2.00 |
| Down | ENSMUSG00000110245 | -4.90 | 2.03E-03 | Gm20100       | TEC | 2.65 | 2.95 | 3.01 | 2.86 | 2.00 | 2.00 | 2.00 | 2.12 |
| Down | ENSMUSG00000102523 | -1.95 | 2.06E-03 | Gm37783       | TEC | 2.85 | 3.39 | 4.43 | 3.15 | 2.00 | 2.92 | 2.54 | 2.78 |
| Down | ENSMUSG00000110068 | -1.55 | 2.06E-03 | Gm45294       | TEC | 3.67 | 3.19 | 2.93 | 3.01 | 2.00 | 2.85 | 2.00 | 2.99 |
| Down | ENSMUSG00000104388 | -1.48 | 2.07E-03 | Gm37033       | TEC | 2.85 | 4.31 | 3.43 | 2.25 | 2.70 | 2.79 | 3.39 | 2.99 |
| Down | ENSMUSG00000112056 | -3.85 | 2.11E-03 | Gm48181       | TEC | 2.43 | 2.55 | 2.84 | 3.01 | 2.00 | 2.00 | 2.00 | 2.24 |
| Down | ENSMUSG00000113557 | -2.05 | 2.11E-03 | Gm47657       | TEC | 3.02 | 3.57 | 3.75 | 3.45 | 2.00 | 3.33 | 2.00 | 2.24 |
| Down | ENSMUSG00000111107 | -1.73 | 2.13E-03 | Gm48737       | TEC | 2.94 | 3.63 | 3.80 | 2.94 | 2.25 | 2.34 | 2.79 | 2.78 |
| Down | ENSMUSG00000102280 | -1.51 | 2.13E-03 | D330025C2Rik  | TEC | 3.67 | 4.50 | 4.49 | 3.55 | 3.17 | 3.40 | 3.40 | 3.06 |
| Down | ENSMUSG00000106802 | -2.27 | 2.14E-03 | Gm42865       | TEC | 3.25 | 3.11 | 3.01 | 3.82 | 2.00 | 2.62 | 2.35 | 2.54 |
| Down | ENSMUSG00000106047 | -3.90 | 2.16E-03 | Gm42942       | TEC | 2.16 | 2.55 | 2.84 | 3.21 | 2.00 | 2.00 | 2.00 | 2.24 |
| Down | ENSMUSG00000106800 | -5.42 | 2.17E-03 | 1700030N18Rik | TEC | 2.54 | 2.55 | 3.30 | 2.59 | 2.00 | 2.00 | 2.00 | 2.00 |
| Down | ENSMUSG00000103143 | -4.23 | 2.17E-03 | Gm37742       | TEC | 3.38 | 2.95 | 3.30 | 3.08 | 2.00 | 2.12 | 2.00 | 2.24 |
| Down | ENSMUSG00000105691 | -1.87 | 2.17E-03 | Gm42876       | TEC | 3.50 | 3.33 | 3.49 | 3.33 | 2.00 | 2.00 | 3.13 | 2.70 |
| Down | ENSMUSG00000102139 | -3.08 | 2.18E-03 | Gm37109       | TEC | 3.77 | 4.09 | 4.09 | 3.01 | 2.00 | 2.00 | 2.00 | 3.12 |
| Down | ENSMUSG00000109385 | -2.05 | 2.18E-03 | Gm44518       | TEC | 3.95 | 3.26 | 3.60 | 3.74 | 2.00 | 2.70 | 2.00 | 3.29 |
| Down | ENSMUSG00000103313 | -1.19 | 2.20E-03 | Gm38357       | TEC | 3.38 | 4.24 | 4.37 | 4.19 | 3.77 | 2.92 | 3.24 | 3.06 |
| Down | ENSMUSG00000107780 | -4.67 | 2.24E-03 | 9530013L04Rik | TEC | 3.44 | 2.43 | 3.44 | 2.14 | 2.00 | 2.00 | 2.00 | 2.00 |
| Down | ENSMUSG00000113656 | -1.70 | 2.26E-03 | Gm47370       | TEC | 3.18 | 3.26 | 3.65 | 3.45 | 2.00 | 2.00 | 2.45 | 3.39 |
| Down | ENSMUSG00000102275 | -4.30 | 2.28E-03 | Gm37144       | TEC | 2.16 | 2.86 | 2.42 | 2.84 | 2.00 | 2.12 | 2.00 | 2.00 |
| Down | ENSMUSG00000109109 | -2.46 | 2.28E-03 | Gm44953       | TEC | 3.18 | 2.95 | 2.93 | 3.01 | 2.82 | 2.00 | 2.00 | 2.00 |
| Down | ENSMUSG00000103227 | -1.90 | 2.31E-03 | Gm37203       | TEC | 2.54 | 3.03 | 2.93 | 3.00 | 2.33 | 2.53 | 2.00 | 2.92 |
| Down | ENSMUSG00000110959 | -3.39 | 2.40E-03 | Gm47198       | TEC | 2.00 | 2.86 | 3.30 | 2.69 | 2.00 | 2.00 | 2.00 | 2.24 |
| Down | ENSMUSG00000103599 | -4.33 | 2.41E-03 | Gm37356       | TEC | 2.94 | 3.19 | 2.74 | 2.86 | 2.00 | 2.00 | 2.00 | 2.24 |
| Down | ENSMUSG00000112660 | -4.22 | 2.42E-03 | Gm48761       | TEC | 2.94 | 3.19 | 3.23 | 3.33 | 2.00 | 2.00 | 2.00 | 2.34 |
| Down | ENSMUSG00000108959 | -5.16 | 2.43E-03 | Gm44697       | TEC | 3.38 | 2.55 | 2.74 | 3.15 | 2.00 | 2.00 | 2.00 | 2.12 |
| Down | ENSMUSG00000104466 | -2.61 | 2.44E-03 | Gm10513       | TEC | 3.38 | 3.11 | 3.93 | 3.39 | 2.00 | 2.00 | 2.00 | 3.12 |
| Down | ENSMUSG00000103996 | -4.39 | 2.48E-03 | 4833421G17Rik | TEC | 2.00 | 2.30 | 2.54 | 2.77 | 2.00 | 2.00 | 2.00 | 2.00 |
| Down | ENSMUSG00000104877 | -2.32 | 2.52E-03 | Gm42651       | TEC | 3.18 | 2.76 | 3.09 | 3.01 | 2.00 | 2.00 | 2.00 | 2.85 |
| Down | ENSMUSG00000107865 | -3.27 | 2.54E-03 | Gm44417       | TEC | 2.85 | 2.43 | 2.84 | 2.77 | 2.13 | 2.24 | 2.00 | 2.00 |
| Down | ENSMUSG00000107698 | -3.06 | 2.54E-03 | Gm44430       | TEC | 3.38 | 3.63 | 3.23 | 3.01 | 2.00 | 2.00 | 2.00 | 2.78 |
| Down | ENSMUSG00000105431 | -2.94 | 2.57E-03 | Gm42640       | TEC | 2.75 | 2.55 | 3.30 | 2.27 | 2.00 | 2.00 | 2.00 | 2.44 |
| Down | ENSMUSG00000105761 | -2.43 | 2.57E-03 | Gm43787       | TEC | 2.75 | 2.66 | 3.23 | 2.86 | 2.00 | 2.12 | 2.35 | 2.34 |
| Down | ENSMUSG00000103209 | -1.91 | 2.59E-03 | Gm37331       | TEC | 3.02 | 3.52 | 3.23 | 2.94 | 2.00 | 2.70 | 2.00 | 2.78 |
| Down | ENSMUSG00000105620 | -2.11 | 2.60E-03 | Gm43047       | TEC | 3.44 | 3.97 | 4.65 | 4.74 | 2.00 | 2.53 | 3.50 | 3.23 |
| Down | ENSMUSG00000106024 | -1.75 | 2.60E-03 | A530083M17Rik | TEC | 3.51 | 2.86 | 4.05 | 2.97 | 2.12 | 2.98 | 2.00 | 2.12 |
| Down | ENSMUSG00000108955 | -1.83 | 2.63E-03 | Gm44775       | TEC | 2.85 | 2.86 | 4.20 | 3.89 | 2.47 | 2.08 | 2.45 | 3.17 |
| Down | ENSMUSG00000103186 | -3.45 | 2.65E-03 | Gm37088       | TEC | 2.75 | 2.43 | 3.23 | 2.69 | 2.00 | 2.00 | 2.00 | 2.34 |
| Down | ENSMUSG00000112193 | -4.09 | 2.66E-03 | Gm48206       | TEC | 2.30 | 3.11 | 2.00 | 2.59 | 2.00 | 2.00 | 2.00 | 2.12 |
| Down | ENSMUSG00000020887 | -3.15 | 2.68E-03 | A230052G05Rik | TEC | 3.61 | 3.19 | 3.49 | 2.59 | 2.00 | 2.00 | 2.00 | 2.70 |
| Down | ENSMUSG00000107719 | -1.40 | 2.68E-03 | Gm43937       | TEC | 3.25 | 3.68 | 3.65 | 3.30 | 3.23 | 2.24 | 3.24 | 2.00 |
| Down | ENSMUSG00000104339 | -1.15 | 2.75E-03 | C130089K02Rik | TEC | 3.61 | 4.27 | 4.40 | 3.90 | 3.40 | 3.91 | 2.35 | 2.99 |
| Down | ENSMUSG00000102723 | -3.90 | 2.77E-03 | Gm37936       | TEC | 2.54 | 2.43 | 2.42 | 2.59 | 2.00 | 2.00 | 2.00 | 2.12 |
| Down | ENSMUSG00000109257 | -2.46 | 2.78E-03 | Gm45200       | TEC | 2.75 | 2.76 | 2.74 | 3.27 | 2.00 | 2.24 | 2.00 | 2.54 |
| Down | ENSMUSG00000106062 | -2.20 | 2.80E-03 | Gm43820       | TEC | 3.02 | 3.19 | 3.43 | 3.08 | 2.74 | 2.00 | 2.24 | 2.34 |
| Down | ENSMUSG00000109863 | -3.11 | 2.81E-03 | Gm45643       | TEC | 2.75 | 3.11 | 3.01 | 2.38 | 2.00 | 2.00 | 2.00 | 2.44 |
| Down | ENSMUSG00000115898 | -2.60 | 2.81E-03 | Gm49524       | TEC | 3.25 | 3.03 | 3.30 | 3.08 | 2.00 | 2.00 | 2.00 | 2.00 |
| Down | ENSMUSG00000106717 | -2.01 | 2.83E-03 | Gm42798       | TEC | 3.10 | 4.47 | 3.60 | 3.98 | 2.00 | 2.12 | 3.13 | 3.23 |
| Down | ENSMUSG00000111490 | -4.17 | 2.86E-03 | Gm47159       | TEC | 2.16 | 2.43 | 2.42 | 2.49 | 2.00 | 2.00 | 2.00 | 2.00 |
| Down | ENSMUSG00000102630 | -4.06 | 2.91E-03 | Gm37289       | TEC | 3.30 | 2.00 | 2.93 | 2.77 | 2.00 | 2.00 | 2.00 | 2.12 |
| Down | ENSMUSG00000103774 | -3.22 | 2.92E-03 | Gm36932       | TEC | 3.10 | 3.11 | 3.16 | 4.09 | 2.00 | 2.00 | 2.63 | 2.24 |
| Down | ENSMUSG00000109461 | -2.25 | 2.92E-03 | Gm44848       | TEC | 2.30 | 3.57 | 2.93 | 3.39 | 2.00 | 2.70 | 2.00 | 2.44 |
| Down | ENSMUSG00000107595 | -1.64 | 2.92E-03 | Gm44441       | TEC | 3.10 | 3.83 | 2.93 | 3.08 | 2.74 | 2.85 | 2.00 | 2.44 |
| Down | ENSMUSG00000106648 | -1.75 | 3.03E-03 | Gm43176       | TEC | 2.75 | 2.95 | 3.09 | 3.33 | 2.00 | 2.62 | 2.00 | 2.78 |
| Down | ENSMUSG00000107524 | -2.98 | 3.05E-03 | Gm44136       | TEC | 2.16 | 3.19 | 2.74 | 2.86 | 2.00 | 2.00 | 2.00 | 2.44 |
| Down | ENSMUSG00000102973 | -1.54 | 3.06E-03 | E430014B02Rik | TEC | 3.61 | 2.95 | 3.97 | 3.74 | 2.82 | 2.00 | 3.30 | 2.70 |
| Down | ENSMUSG00000107148 | -3.12 | 3.07E-03 | Gm42888       | TEC | 2.43 | 3.11 | 2.15 | 3.33 | 2.00 | 2.34 | 2.00 | 2.12 |
| Down | ENSMUSG00000105179 | -1.38 | 3.09E-03 | Gm42866       | TEC | 3.77 | 3.26 | 3.70 | 3.33 | 2.13 | 3.28 | 2.00 | 3.23 |
| Down | ENSMUSG00000105453 | -2.27 | 3.13E-03 | Gm43702       | TEC | 3.02 | 2.76 | 2.64 | 2.86 | 2.00 | 2.00 | 2.00 | 2.44 |
| Down | ENSMUSG00000102460 | -3.53 | 3.18E-03 | Gm38197       | TEC | 3.10 | 3.11 | 2.64 | 3.00 | 2.47 | 2.00 | 2.00 | 2.12 |
| Down | ENSMUSG00000114996 | -1.39 | 3.20E-03 | Gm48958       | TEC | 3.38 | 3.73 | 4.82 | 3.33 | 2.82 | 2.62 | 3.63 | 2.99 |
| Down | ENSMUSG00000103506 | -3.74 | 3.23E-03 | Gm38376       | TEC | 2.65 | 3.03 | 2.42 | 2.00 | 2.42 | 2.00 | 2.00 | 2.24 |
| Down | ENSMUSG00000107436 | -2.32 | 3.23E-03 | Gm44416       | TEC | 3.01 | 3.98 | 3.23 | 3.20 | 3.21 | 2.00 | 2.00 | 2.24 |
| Down | ENSMUSG00000108211 | -1.72 | 3.24E-03 | Gm44130       | TEC | 3.50 | 3.63 | 4.01 | 3.45 | 2.13 | 3.28 | 2.63 | 2.62 |
| Down | ENSMUSG00000105519 | -1.38 | 3.26E-03 | E430021H15Rik | TEC | 3.91 | 3.33 | 3.49 | 3.50 | 3.35 | 2.78 | 2.00 | 2.85 |
| Down | ENSMUSG00000106541 | -4.04 | 3.34E-03 | Gm43246       | TEC | 2.16 | 2.00 | 2.84 | 2.27 | 2.00 | 2.00 | 2.00 | 2.00 |
| Down | ENSMUSG00000109456 | -2.21 | 3.34E-03 | Gm44584       | TEC | 3.10 | 2.95 | 3.49 | 2.49 | 2.47 | 2.34 | 2.00 | 2.34 |
| Down | ENSMUSG00000104951 | -1.87 | 3.37E-03 | Gm43413       | TEC | 2.43 | 3.33 | 3.89 | 3.45 | 2.00 | 2.98 | 2.13 | 2.70 |
| Down | ENSMUSG00000110127 | -2.36 | 3.38E-03 | 6430710M23Rik | TEC | 3.38 | 2.66 | 3.36 | 2.59 | 2.37 | 2.00 | 2.63 | 2.00 |
| Down | ENSMUSG00000102160 | -1.67 | 3.40E-03 | Gm36944       | TEC | 3.61 | 3.33 | 3.16 | 3.01 | 2.13 | 2.62 | 2.63 | 2.70 |
| Down | ENSMUSG00000105272 | -1.70 | 3.41E-03 | Gm43071       | TEC | 3.38 | 3.57 | 3.75 | 3.86 | 2.47 | 2.98 | 2.00 | 3.17 |
| Down | ENSMUSG00000103857 | -1.38 | 3.41E-03 | Gm37249       | TEC | 3.56 | 4.01 | 3.54 | 4.05 | 3.17 | 2.24 | 2.45 | 3.62 |
| Down | ENSMUSG00000118909 | -5.93 | 3.50E-03 | Gm49559       | TEC | 2.16 | 3.33 | 3.30 | 3.01 | 2.00 | 2.00 | 2.00 | 2.00 |
| Down | ENSMUSG00000108365 | -1.80 | 3.50E-03 | Gm44951       | TEC | 2.75 | 3.46 | 3.16 | 3.27 | 2.47 | 2.85 | 2.13 | 2.24 |
| Down | ENSMUSG00000104704 | -2.39 | 3.52E-03 | Gm43133       | TEC | 2.43 | 2.95 | 2.84 | 2.86 | 2.25 | 2.44 | 2.00 | 2.00 |

|      |                    |       |          |               |     |      |      |      |      |      |      |      |      |
|------|--------------------|-------|----------|---------------|-----|------|------|------|------|------|------|------|------|
| Down | ENSMUSG00000106772 | -3.17 | 3.62E-03 | Gm43794       | TEC | 3.25 | 2.55 | 2.64 | 2.14 | 2.00 | 2.00 | 2.00 | 2.34 |
| Down | ENSMUSG00000103778 | -2.84 | 3.62E-03 | Gm36930       | TEC | 3.38 | 3.97 | 3.49 | 3.33 | 2.00 | 2.00 | 2.45 | 2.78 |
| Down | ENSMUSG00000106671 | -2.24 | 3.62E-03 | Gm42900       | TEC | 3.67 | 3.03 | 3.36 | 3.15 | 2.00 | 2.00 | 2.45 | 2.92 |
| Down | ENSMUSG00000111340 | -1.78 | 3.66E-03 | Gm47171       | TEC | 3.38 | 4.37 | 4.34 | 4.12 | 3.81 | 2.12 | 2.54 | 2.85 |
| Down | ENSMUSG00000104313 | -3.81 | 3.68E-03 | Gm37911       | TEC | 2.16 | 2.16 | 3.09 | 2.27 | 2.00 | 2.00 | 2.27 | 2.00 |
| Down | ENSMUSG00000102326 | -2.25 | 3.68E-03 | Gm37788       | TEC | 3.38 | 3.39 | 3.16 | 3.21 | 3.04 | 2.00 | 2.00 | 2.24 |
| Down | ENSMUSG00000110400 | -1.86 | 3.69E-03 | Gm45416       | TEC | 3.10 | 2.85 | 2.80 | 2.00 | 2.00 | 2.00 | 2.70 | 2.54 |
| Down | ENSMUSG00000103562 | -4.28 | 3.72E-03 | 2810405F15Rik | TEC | 2.00 | 2.55 | 2.29 | 2.00 | 2.00 | 2.00 | 2.00 | 2.00 |
| Down | ENSMUSG00000103101 | -1.66 | 3.76E-03 | Gm37048       | TEC | 2.94 | 4.01 | 3.23 | 3.39 | 2.00 | 2.12 | 3.30 | 2.70 |
| Down | ENSMUSG00000102863 | -1.45 | 3.79E-03 | Gm37639       | TEC | 3.02 | 3.57 | 3.69 | 3.57 | 2.57 | 2.98 | 3.00 | 2.34 |
| Down | ENSMUSG00000112990 | -1.25 | 3.79E-03 | Gm47372       | TEC | 4.15 | 3.33 | 3.60 | 4.22 | 2.90 | 3.33 | 3.30 | 2.70 |
| Down | ENSMUSG00000107375 | -3.79 | 3.85E-03 | Gm43084       | TEC | 2.00 | 2.30 | 2.64 | 2.77 | 2.00 | 2.00 | 2.12 | 2.70 |
| Down | ENSMUSG00000106071 | -2.25 | 3.85E-03 | Gm43826       | TEC | 2.75 | 4.09 | 3.16 | 3.21 | 2.25 | 2.00 | 2.00 | 3.12 |
| Down | ENSMUSG00000107171 | -1.91 | 3.85E-03 | Gm42572       | TEC | 3.38 | 3.19 | 2.74 | 2.69 | 2.37 | 2.00 | 2.71 | 2.24 |
| Down | ENSMUSG00000103593 | -1.65 | 3.85E-03 | Gm37352       | TEC | 3.56 | 2.66 | 3.60 | 3.15 | 2.90 | 2.00 | 2.00 | 2.99 |
| Down | ENSMUSG00000103722 | -2.72 | 3.86E-03 | 2700078F05Rik | TEC | 3.18 | 3.52 | 3.40 | 4.53 | 2.00 | 2.00 | 2.24 | 3.39 |
| Down | ENSMUSG00000102235 | -4.41 | 3.97E-03 | Gm37886       | TEC | 3.10 | 2.55 | 2.54 | 2.38 | 2.00 | 2.00 | 2.00 | 2.12 |
| Down | ENSMUSG00000107610 | -2.74 | 4.00E-03 | D530018E20Rik | TEC | 2.85 | 2.43 | 2.93 | 2.49 | 2.00 | 2.00 | 2.00 | 2.44 |
| Down | ENSMUSG00000109317 | -2.48 | 4.00E-03 | Gm45041       | TEC | 2.43 | 2.95 | 2.54 | 2.86 | 2.00 | 2.00 | 2.13 | 2.44 |
| Down | ENSMUSG00000103574 | -4.25 | 4.02E-03 | Gm43648       | TEC | 2.85 | 2.76 | 3.16 | 2.59 | 2.00 | 2.24 | 2.00 | 2.00 |
| Down | ENSMUSG00000105526 | -1.66 | 4.02E-03 | Gm43490       | TEC | 2.64 | 3.63 | 3.16 | 3.82 | 2.82 | 2.94 | 2.13 | 2.24 |
| Down | ENSMUSG00000104454 | -2.15 | 4.03E-03 | Gm37827       | TEC | 3.56 | 3.03 | 2.93 | 3.21 | 2.00 | 2.92 | 2.00 | 2.34 |
| Down | ENSMUSG00000103006 | -2.20 | 4.09E-03 | 4933417C20Rik | TEC | 2.75 | 4.17 | 3.93 | 3.90 | 2.00 | 2.66 | 2.93 | 2.70 |
| Down | ENSMUSG00000107749 | -1.77 | 4.10E-03 | Gm44321       | TEC | 3.50 | 3.26 | 4.01 | 3.50 | 2.57 | 2.24 | 2.71 | 3.06 |
| Down | ENSMUSG00000111264 | -1.65 | 4.11E-03 | E030022116Rik | TEC | 4.65 | 4.77 | 3.89 | 4.50 | 2.00 | 3.89 | 3.79 | 2.92 |
| Down | ENSMUSG00000103039 | -1.79 | 4.12E-03 | Gm37123       | TEC | 2.85 | 3.78 | 3.49 | 3.55 | 2.47 | 2.00 | 2.93 | 2.78 |
| Down | ENSMUSG00000105011 | -1.81 | 4.14E-03 | Gm43210       | TEC | 3.18 | 3.68 | 4.13 | 4.48 | 2.00 | 3.11 | 3.35 | 2.62 |
| Down | ENSMUSG00000106288 | -1.23 | 4.15E-03 | Gm43593       | TEC | 3.44 | 3.63 | 3.23 | 3.90 | 2.57 | 3.28 | 2.79 | 2.78 |
| Down | ENSMUSG00000105935 | -2.70 | 4.17E-03 | Gm43628       | TEC | 2.65 | 2.30 | 3.30 | 2.77 | 2.00 | 2.25 | 2.35 | 2.00 |
| Down | ENSMUSG00000104190 | -4.14 | 4.18E-03 | Gm10472       | TEC | 3.10 | 2.43 | 3.09 | 2.69 | 2.00 | 2.00 | 2.00 | 2.24 |
| Down | ENSMUSG00000113379 | -3.50 | 4.24E-03 | Gm46436       | TEC | 2.16 | 3.46 | 2.15 | 3.08 | 2.00 | 2.24 | 2.00 | 2.00 |
| Down | ENSMUSG00000107198 | -2.38 | 4.34E-03 | Gm42728       | TEC | 2.85 | 3.63 | 2.84 | 2.69 | 2.00 | 2.00 | 2.63 | 2.34 |
| Down | ENSMUSG00000108173 | -2.80 | 4.35E-03 | Gm45031       | TEC | 3.95 | 3.03 | 2.54 | 3.21 | 2.53 | 2.00 | 2.24 | 2.24 |
| Down | ENSMUSG00000104394 | -1.11 | 4.37E-03 | Gm37254       | TEC | 4.87 | 4.79 | 6.07 | 4.13 | 4.78 | 4.18 | 4.54 | 4.43 |
| Down | ENSMUSG00000112442 | -2.06 | 4.41E-03 | Gm47992       | TEC | 2.16 | 3.33 | 2.84 | 3.01 | 2.00 | 2.53 | 2.24 | 2.24 |
| Down | ENSMUSG00000105290 | -2.60 | 4.44E-03 | Gm43528       | TEC | 2.43 | 2.55 | 2.64 | 3.55 | 2.25 | 2.00 | 2.13 | 2.00 |
| Down | ENSMUSG00000116298 | -1.71 | 4.46E-03 | 4833412C15Rik | TEC | 2.85 | 3.57 | 4.13 | 3.50 | 2.00 | 2.98 | 2.24 | 3.17 |
| Down | ENSMUSG00000106682 | -2.75 | 4.52E-03 | Gm42648       | TEC | 3.31 | 2.66 | 3.16 | 3.74 | 2.00 | 2.00 | 2.12 | 2.00 |
| Down | ENSMUSG00000103846 | -3.03 | 4.60E-03 | Gm37809       | TEC | 2.94 | 2.43 | 3.09 | 2.69 | 2.00 | 2.00 | 2.45 | 2.00 |
| Down | ENSMUSG00000102653 | -2.56 | 4.60E-03 | Gm37079       | TEC | 3.10 | 3.46 | 3.01 | 3.39 | 2.97 | 2.00 | 2.00 | 2.00 |
| Down | ENSMUSG00000103281 | -4.31 | 4.64E-03 | Gm37278       | TEC | 2.85 | 2.43 | 2.54 | 2.69 | 2.00 | 2.00 | 2.12 | 2.12 |
| Down | ENSMUSG00000102879 | -4.01 | 4.68E-03 | Gm37135       | TEC | 2.16 | 3.19 | 2.00 | 2.49 | 2.00 | 2.00 | 2.12 | 2.00 |
| Down | ENSMUSG00000106891 | -1.50 | 4.69E-03 | Gm43460       | TEC | 3.91 | 4.31 | 4.34 | 4.37 | 2.66 | 3.56 | 3.35 | 3.12 |
| Down | ENSMUSG00000105592 | -1.90 | 4.70E-03 | Gm42527       | TEC | 3.56 | 3.33 | 2.93 | 3.27 | 2.25 | 2.44 | 2.00 | 2.99 |
| Down | ENSMUSG00000102316 | -4.52 | 4.71E-03 | Gm37629       | TEC | 2.00 | 2.86 | 2.29 | 2.59 | 2.00 | 2.00 | 2.00 | 2.00 |
| Down | ENSMUSG00000105392 | -1.26 | 4.73E-03 | Gm43339       | TEC | 4.05 | 3.54 | 3.54 | 3.98 | 2.37 | 3.00 | 3.24 | 3.44 |
| Down | ENSMUSG00000109150 | -1.36 | 4.75E-03 | Gm45793       | TEC | 3.46 | 3.46 | 3.36 | 3.28 | 2.12 | 2.63 | 3.29 | 2.63 |
| Down | ENSMUSG00000107826 | -1.74 | 4.78E-03 | Gm44242       | TEC | 3.95 | 3.83 | 4.09 | 3.55 | 4.57 | 3.61 | 2.00 | 2.00 |
| Down | ENSMUSG00000105804 | -1.11 | 4.86E-03 | Gm43654       | TEC | 3.86 | 4.05 | 4.07 | 4.09 | 2.90 | 3.61 | 3.75 | 2.85 |
| Down | ENSMUSG00000104524 | -2.64 | 4.90E-03 | Gm37333       | TEC | 3.10 | 2.95 | 3.93 | 3.78 | 2.00 | 2.00 | 2.00 | 3.12 |
| Down | ENSMUSG00000102698 | -1.56 | 5.02E-03 | Gm37777       | TEC | 2.94 | 4.44 | 3.60 | 3.82 | 3.22 | 3.07 | 2.92 | 2.00 |
| Down | ENSMUSG00000116494 | -2.44 | 5.05E-03 | Gm49449       | TEC | 2.85 | 3.33 | 3.23 | 2.86 | 2.37 | 2.34 | 2.00 | 2.34 |
| Down | ENSMUSG00000108057 | -4.36 | 5.13E-03 | Gm44234       | TEC | 2.30 | 2.86 | 2.15 | 3.08 | 2.00 | 2.00 | 2.12 | 2.00 |
| Down | ENSMUSG00000105469 | -1.09 | 5.13E-03 | A930036I15Rik | TEC | 3.61 | 3.83 | 3.89 | 3.98 | 2.47 | 3.33 | 2.54 | 3.78 |
| Down | ENSMUSG00000105632 | -1.52 | 5.15E-03 | Gm43272       | TEC | 3.02 | 3.52 | 2.84 | 3.21 | 2.82 | 2.00 | 2.00 | 2.99 |
| Down | ENSMUSG00000107226 | -2.38 | 5.17E-03 | Gm43594       | TEC | 3.02 | 2.86 | 3.16 | 2.77 | 2.00 | 2.00 | 2.00 | 2.78 |
| Down | ENSMUSG00000102436 | -4.62 | 5.19E-03 | Gm38047       | TEC | 2.16 | 2.86 | 2.15 | 2.69 | 2.00 | 2.00 | 2.00 | 2.00 |
| Down | ENSMUSG00000104626 | -2.02 | 5.20E-03 | Gm42675       | TEC | 3.31 | 3.63 | 3.89 | 3.60 | 2.62 | 2.00 | 2.24 | 2.00 |
| Down | ENSMUSG00000106220 | -2.50 | 5.21E-03 | Gm43288       | TEC | 3.25 | 2.76 | 3.01 | 3.33 | 2.00 | 3.33 | 2.85 | 2.00 |
| Down | ENSMUSG00000102240 | -1.67 | 5.22E-03 | Gm37717       | TEC | 3.38 | 3.86 | 3.09 | 3.27 | 2.74 | 2.00 | 2.00 | 2.92 |
| Down | ENSMUSG00000111505 | -1.15 | 5.24E-03 | Gm48673       | TEC | 3.91 | 3.11 | 4.09 | 4.19 | 3.04 | 2.98 | 2.63 | 3.70 |
| Down | ENSMUSG00000103742 | -3.08 | 5.27E-03 | Gm38240       | TEC | 2.54 | 2.86 | 2.54 | 2.86 | 2.00 | 2.00 | 2.00 | 2.34 |
| Down | ENSMUSG00000106934 | -2.22 | 5.30E-03 | Gm42506       | TEC | 3.02 | 2.86 | 2.54 | 2.94 | 2.00 | 2.00 | 2.00 | 2.70 |
| Down | ENSMUSG00000107745 | -1.27 | 5.38E-03 | Gm43917       | TEC | 3.99 | 4.74 | 4.13 | 3.90 | 2.97 | 3.79 | 3.62 | 3.00 |
| Down | ENSMUSG00000104121 | -2.21 | 5.41E-03 | Gm37485       | TEC | 3.25 | 4.20 | 3.16 | 3.21 | 2.00 | 2.98 | 2.63 | 2.12 |
| Down | ENSMUSG00000103560 | -2.52 | 5.50E-03 | Gm38070       | TEC | 3.44 | 4.09 | 3.09 | 4.39 | 2.00 | 2.34 | 2.13 | 3.29 |
| Down | ENSMUSG00000104687 | -3.52 | 5.52E-03 | Gm42899       | TEC | 2.75 | 2.43 | 2.42 | 2.77 | 2.00 | 2.12 | 2.00 | 2.12 |
| Down | ENSMUSG00000105598 | -2.83 | 5.58E-03 | Gm43186       | TEC | 2.43 | 4.01 | 3.16 | 3.27 | 2.90 | 2.00 | 2.00 | 2.00 |
| Down | ENSMUSG00000112300 | -2.55 | 5.60E-03 | Gm47976       | TEC | 3.25 | 3.26 | 2.84 | 3.15 | 2.00 | 2.00 | 2.00 | 2.85 |
| Down | ENSMUSG00000113126 | -1.77 | 5.62E-03 | Gm47588       | TEC | 3.18 | 3.52 | 3.16 | 3.33 | 2.37 | 3.11 | 2.00 | 2.34 |
| Down | ENSMUSG00000103364 | -1.48 | 5.66E-03 | Gm38157       | TEC | 2.75 | 3.73 | 3.23 | 3.35 | 2.53 | 2.13 | 2.00 | 2.12 |
| Down | ENSMUSG00000103223 | -4.83 | 5.81E-03 | Gm37730       | TEC | 2.30 | 2.95 | 2.64 | 3.27 | 2.00 | 2.00 | 2.00 | 2.00 |
| Down | ENSMUSG00000103928 | -1.50 | 5.84E-03 | Gm37893       | TEC | 3.31 | 3.78 | 4.60 | 3.84 | 2.90 | 3.84 | 2.99 | 2.99 |
| Down | ENSMUSG00000103163 | 3.88  | 5.87E-03 | Gm38146       | TEC | 2.16 | 2.16 | 2.16 | 2.00 | 2.00 | 2.00 | 2.00 | 2.00 |
| Down | ENSMUSG00000102617 | -4.15 | 5.93E-03 | Gm37842       | TEC | 2.43 | 2.55 | 2.93 | 3.33 | 2.00 | 2.00 | 2.00 | 2.24 |
| Down | ENSMUSG00000105772 | -2.51 | 5.94E-03 | Gm42496       | TEC | 3.10 | 2.95 | 2.54 | 3.39 | 2.00 | 2.00 | 2.63 | 2.24 |
| Down | ENSMUSG00000113922 | -1.75 | 5.96E-03 | Gm48887       | TEC | 3.02 | 3.33 | 3.23 | 3.21 | 2.25 | 2.00 | 2.00 | 2.00 |
| Down | ENSMUSG00000111077 | -2.83 | 6.00E-03 | Gm48743       | TEC | 2.85 | 2.86 | 3.49 | 3.45 | 2.00 | 2.62 | 2.00 | 2.24 |
| Down | ENSMUSG00000112866 | -3.88 | 6.03E-03 | Gm47704       | TEC | 2.16 | 3.63 | 2.84 | 3.74 | 2.00 | 2.00 | 2.00 | 2.44 |
| Down | ENSMUSG00000113698 | -1.71 | 6.06E-03 | Gm47987       | TEC | 3.02 | 3.33 | 3.16 | 3.50 | 2.00 | 3.22 | 2.00 | 2.44 |
| Down | ENSMUSG00000103751 | -2.82 | 6.14E-03 | Gm37283       | TEC | 2.85 | 3.63 | 3.16 | 3.39 | 2.00 | 2.00 | 2.00 | 2.85 |
| Down | ENSMUSG00000102211 | -3.50 | 6.38E-03 | Gm37490       | TEC | 2.54 | 2.55 | 2.00 | 3.08 | 2.25 | 2.00 | 2.00 | 2.00 |
| Down | ENSMUSG00000106292 | -1.36 | 6.41E-03 | Gm43174       | TEC | 3.02 | 2.76 | 3.75 | 3.78 | 2.97 | 2.70 | 2.00 | 2.99 |
| Down | ENSMUSG00000104343 | -1.98 | 6.42E-03 | 5730408A14Rik | TEC | 2.85 | 3.92 | 3.01 | 3.08 | 2.00 | 3.17 | 2.00 | 2.24 |
| Down | ENSMUSG00000102427 | -3.20 | 6.68E-03 | Gm37463       | TEC | 2.43 | 2.16 | 3.01 | 3.01 | 2.00 | 2.00 | 2.00 | 2.34 |
| Down | ENSMUSG00000105135 | -1.25 | 6.68E-03 | Gm43667       | TEC | 4.03 | 4.09 | 3.93 | 4.22 | 2.66 | 2.62 | 3.24 | 3.95 |
|      |                    |       |          |               |     |      |      |      |      |      |      |      |      |

|      |                     |       |          |               |                                  |      |      |      |      |      |      |        |      |
|------|---------------------|-------|----------|---------------|----------------------------------|------|------|------|------|------|------|--------|------|
| Down | ENSMUSG00000103391  | -1.95 | 6.82E-03 | Gm38302       | TEC                              | 2.43 | 3.11 | 2.84 | 3.15 | 2.00 | 2.00 | 2.45   | 2.62 |
| Down | ENSMUSG00000108572  | -1.93 | 6.87E-03 | Gm44883       | TEC                              | 2.54 | 2.76 | 3.49 | 3.15 | 2.37 | 2.24 | 2.00   | 2.70 |
| Down | ENSMUSG00000106126  | -4.73 | 6.99E-03 | Gm43781       | TEC                              | 4.03 | 3.19 | 3.01 | 3.50 | 2.00 | 2.00 | 2.00   | 2.34 |
| Down | ENSMUSG00000107165  | -2.53 | 7.01E-03 | Gm43747       | TEC                              | 2.16 | 2.86 | 2.84 | 3.27 | 2.00 | 2.00 | 2.00   | 2.13 |
| Down | ENSMUSG00000115144  | -1.65 | 7.15E-03 | Gm7968        | TEC                              | 3.38 | 3.39 | 3.16 | 2.00 | 2.00 | 2.00 | 3.00   | 2.54 |
| Down | ENSMUSG00000104682  | -1.80 | 7.19E-03 | Gm42636       | TEC                              | 3.44 | 3.92 | 3.43 | 3.27 | 2.00 | 2.12 | 2.71   | 3.29 |
| Down | ENSMUSG00000106680  | -2.38 | 7.24E-03 | Gm43952       | TEC                              | 2.94 | 3.12 | 3.84 | 2.00 | 2.00 | 2.00 | 2.00   | 2.62 |
| Down | ENSMUSG00000112592  | -1.99 | 7.31E-03 | Gm19972       | TEC                              | 3.02 | 2.76 | 3.75 | 3.60 | 2.00 | 2.00 | 2.00   | 3.23 |
| Down | ENSMUSG00000104374  | -1.49 | 7.31E-03 | Gm37517       | TEC                              | 3.91 | 3.11 | 3.65 | 3.78 | 2.57 | 2.00 | 3.30   | 3.06 |
| Down | ENSMUSG00000104257  | -2.13 | 7.44E-03 | Gm20172       | TEC                              | 3.18 | 2.55 | 2.54 | 3.01 | 2.00 | 2.00 | 2.35   | 2.54 |
| Down | ENSMUSG00000103004  | -2.09 | 7.48E-03 | 290002M20Rik  | TEC                              | 2.43 | 2.66 | 3.30 | 2.77 | 2.00 | 2.00 | 2.00   | 2.78 |
| Down | ENSMUSG00000105184  | -2.81 | 7.49E-03 | Gm42537       | TEC                              | 2.65 | 2.76 | 2.84 | 3.08 | 2.00 | 2.24 | 2.00   | 2.34 |
| Down | ENSMUSG00000108389  | -1.73 | 7.57E-03 | Gm45206       | TEC                              | 3.31 | 3.33 | 3.84 | 3.39 | 2.00 | 2.92 | 2.00   | 3.17 |
| Down | ENSMUSG00000105740  | -1.82 | 7.60E-03 | Gm42685       | TEC                              | 2.94 | 2.30 | 3.30 | 2.94 | 2.00 | 2.53 | 2.00   | 2.63 |
| Down | ENSMUSG00000104814  | -1.03 | 7.63E-03 | Gm42979       | TEC                              | 3.50 | 4.13 | 4.17 | 3.90 | 3.23 | 3.28 | 3.71   | 2.62 |
| Down | ENSMUSG00000104406  | -1.77 | 7.65E-03 | Gm38014       | TEC                              | 3.18 | 2.76 | 3.54 | 3.27 | 2.57 | 2.12 | 2.00   | 2.99 |
| Down | ENSMUSG00000103805  | -1.35 | 7.65E-03 | Gm37063       | TEC                              | 3.10 | 3.11 | 4.09 | 3.01 | 2.97 | 2.70 | 2.54   | 2.62 |
| Down | ENSMUSG00000104486  | -5.18 | 7.69E-03 | Gm38066       | TEC                              | 2.43 | 2.55 | 3.09 | 2.59 | 2.00 | 2.00 | 2.00   | 2.00 |
| Down | ENSMUSG00000104851  | -1.98 | 7.77E-03 | E030026E10Rik | TEC                              | 3.18 | 3.73 | 3.43 | 2.59 | 2.37 | 2.00 | 2.13   | 3.06 |
| Down | ENSMUSG00000107050  | -1.69 | 7.89E-03 | C030017S19Rik | TEC                              | 3.61 | 2.76 | 2.64 | 3.39 | 2.00 | 2.44 | 2.24   | 3.17 |
| Down | ENSMUSG00000104963  | -1.64 | 7.90E-03 | Gm42974       | TEC                              | 2.54 | 3.68 | 3.80 | 3.69 | 2.00 | 2.34 | 3.45   | 2.44 |
| Down | ENSMUSG00000105745  | -1.11 | 7.90E-03 | Gm42521       | TEC                              | 3.56 | 4.34 | 3.30 | 4.12 | 2.97 | 3.22 | 3.30   | 3.17 |
| Down | ENSMUSG00000105976  | -3.61 | 7.98E-03 | Gm42782       | TEC                              | 2.43 | 2.95 | 2.64 | 2.49 | 2.00 | 2.00 | 2.24   | 2.40 |
| Down | ENSMUSG00000103926  | -2.09 | 7.98E-03 | Gm37894       | TEC                              | 2.94 | 3.57 | 3.09 | 3.01 | 2.13 | 2.70 | 2.00   | 2.54 |
| Down | ENSMUSG00000108122  | -4.05 | 8.00E-03 | Gm44116       | TEC                              | 2.00 | 2.66 | 2.42 | 2.00 | 2.27 | 2.00 | 2.00   | 2.00 |
| Down | ENSMUSG00000109013  | -2.09 | 8.09E-03 | Gm44723       | TEC                              | 3.02 | 3.83 | 4.01 | 4.53 | 3.29 | 2.62 | 2.00   | 2.78 |
| Down | ENSMUSG00000104253  | -1.30 | 8.17E-03 | Gm37174       | TEC                              | 3.86 | 4.34 | 4.73 | 4.12 | 3.77 | 2.24 | 3.50   | 3.17 |
| Down | ENSMUSG00000109963  | -2.53 | 8.42E-03 | Gm45635       | TEC                              | 2.65 | 3.19 | 2.93 | 3.27 | 2.00 | 2.70 | 2.00   | 2.12 |
| Down | ENSMUSG00000112948  | -1.96 | 8.43E-03 | Gm48871       | TEC                              | 3.56 | 2.95 | 3.01 | 2.77 | 2.13 | 2.98 | 2.00   | 2.12 |
| Down | ENSMUSG00000104528  | -2.67 | 8.46E-03 | Gm43314       | TEC                              | 3.38 | 3.03 | 3.84 | 3.45 | 2.25 | 2.44 | 2.63   | 2.00 |
| Down | ENSMUSG00000114267  | -1.83 | 8.48E-03 | Gm48600       | TEC                              | 3.18 | 4.13 | 3.89 | 3.74 | 2.00 | 2.53 | 2.71   | 3.39 |
| Down | ENSMUSG00000103403  | -1.63 | 8.56E-03 | Gm37931       | TEC                              | 2.75 | 3.19 | 3.09 | 3.27 | 2.13 | 2.44 | 2.63   | 2.54 |
| Down | ENSMUSG00000110677  | -3.23 | 8.61E-03 | Gm49569       | TEC                              | 2.76 | 2.94 | 2.64 | 2.59 | 2.00 | 2.00 | 2.24   | 2.40 |
| Down | ENSMUSG00000108954  | -1.67 | 8.70E-03 | Gm44901       | TEC                              | 4.22 | 3.68 | 3.69 | 4.45 | 3.77 | 3.17 | 3.17   | 3.17 |
| Down | ENSMUSG00000108330  | -3.01 | 8.80E-03 | Gm44882       | TEC                              | 2.30 | 2.76 | 2.84 | 2.59 | 2.25 | 2.00 | 2.00   | 2.12 |
| Down | ENSMUSG00000102353  | -5.25 | 8.86E-03 | Gm38345       | TEC                              | 3.18 | 2.95 | 3.16 | 2.00 | 2.00 | 2.00 | 2.12   | 2.00 |
| Down | ENSMUSG00000113610  | -3.53 | 8.93E-03 | Gm47132       | TEC                              | 2.16 | 2.76 | 2.93 | 2.49 | 2.00 | 2.12 | 2.00   | 2.12 |
| Down | ENSMUSG00000108732  | -1.82 | 8.96E-03 | 2310043P16Rik | TEC                              | 3.61 | 3.73 | 3.54 | 3.74 | 2.00 | 2.85 | 2.71   | 2.99 |
| Down | ENSMUSG00000112084  | -1.33 | 9.04E-03 | Gm10773       | TEC                              | 3.44 | 3.46 | 3.93 | 3.27 | 3.60 | 2.34 | 2.24   | 2.70 |
| Down | ENSMUSG00000107116  | -2.09 | 9.11E-03 | Gm43274       | TEC                              | 3.10 | 4.47 | 3.93 | 3.69 | 2.00 | 2.92 | 2.00   | 3.39 |
| Down | ENSMUSG00000104964  | -3.86 | 9.24E-03 | 4930597L12Rik | TEC                              | 2.30 | 2.16 | 2.00 | 2.69 | 2.00 | 2.00 | 2.00   | 2.00 |
| Down | ENSMUSG00000104220  | -4.26 | 9.50E-03 | 4930578I07Rik | TEC                              | 2.75 | 2.30 | 2.93 | 2.00 | 2.38 | 2.00 | 2.13   | 2.00 |
| Down | ENSMUSG00000107576  | -1.66 | 9.52E-03 | Gm44093       | TEC                              | 2.54 | 2.76 | 3.30 | 3.08 | 2.47 | 2.34 | 2.00   | 2.62 |
| Down | ENSMUSG00000107468  | -1.55 | 9.54E-03 | 5730507A11Rik | TEC                              | 3.10 | 3.26 | 3.43 | 2.89 | 2.00 | 2.62 | 2.13   | 2.99 |
| Down | ENSMUSG00000103621  | -1.75 | 9.60E-03 | Gm38366       | TEC                              | 2.75 | 2.66 | 3.43 | 2.77 | 2.00 | 2.70 | 2.13   | 2.44 |
| Down | ENSMUSG00000110079  | -1.90 | 9.67E-03 | Gm45292       | TEC                              | 3.44 | 3.46 | 4.05 | 3.40 | 3.40 | 2.00 | 2.00   | 2.85 |
| Down | ENSMUSG00000104029  | -3.23 | 9.70E-03 | Gm37212       | TEC                              | 3.92 | 3.31 | 3.70 | 3.60 | 2.00 | 3.60 | 2.78   | 2.78 |
| Down | ENSMUSG00000102147  | -2.33 | 9.88E-03 | Gm38055       | TEC                              | 2.43 | 2.86 | 2.84 | 2.86 | 2.25 | 2.00 | 2.00   | 2.44 |
| Down | ENSMUSG00000104876  | -2.98 | 3.48E-03 | TR_c_gene     |                                  | 3.56 | 3.39 | 3.16 | 3.74 | 2.13 | 2.24 | 2.00   | 2.70 |
| Down | ENSMUSG00000107272  | -2.91 | 2.72E-32 | Gm34583       | transcribed_processed_pseudogene | 7.20 | 6.90 | 7.26 | 6.43 | 4.59 | 3.77 | 4.77   | 4.02 |
| Down | ENSMUSG00000113701  | -2.38 | 1.55E-18 | B230303A05Rik | transcribed_processed_pseudogene | 6.32 | 6.45 | 6.74 | 6.63 | 4.49 | 4.72 | 3.63   | 4.55 |
| Up   | ENSMUSG00000063171  | 1.23  | 5.86E-13 | Rps4l         | transcribed_processed_pseudogene | 6.49 | 6.50 | 5.95 | 6.22 | 7.63 | 7.19 | 7.48   | 7.63 |
| Down | ENSMUSG00000109116  | -1.72 | 3.38E-11 | 4930431P19Rik | transcribed_processed_pseudogene | 4.91 | 4.42 | 5.53 | 5.20 | 3.77 | 3.94 | 3.67   | 3.57 |
| Down | ENSMUSG00000905959  | -2.72 | 3.41E-11 | Gm17137       | transcribed_processed_pseudogene | 3.91 | 3.88 | 4.27 | 3.69 | 2.74 | 2.34 | 2.00   | 2.85 |
| Down | ENSMUSG00000045327  | -1.87 | 4.11E-11 | 6330549D23Rik | transcribed_processed_pseudogene | 5.28 | 5.40 | 5.38 | 5.44 | 3.98 | 3.43 | 4.00   | 3.89 |
| Down | ENSMUSG00000886583  | -1.44 | 5.94E-09 | Gm15500       | transcribed_processed_pseudogene | 4.89 | 4.95 | 4.78 | 5.33 | 3.73 | 3.56 | 3.63   | 4.31 |
| Down | ENSMUSG00000057818  | -3.63 | 7.69E-09 | 1600029O15Rik | transcribed_processed_pseudogene | 4.29 | 4.09 | 4.63 | 4.25 | 2.54 | 2.62 | 2.40   | 2.50 |
| Down | ENSMUSG00000072892  | -1.56 | 1.04E-08 | Rpl37r1       | transcribed_processed_pseudogene | 4.70 | 4.47 | 4.40 | 5.17 | 3.50 | 3.47 | 3.75   | 3.39 |
| Down | ENSMUSG00000059775  | -2.38 | 3.80E-08 | Rps26-ps1     | transcribed_processed_pseudogene | 3.77 | 3.63 | 3.54 | 2.13 | 3.65 | 2.62 | 2.35   | 2.38 |
| Down | ENSMUSG00000055676  | -1.80 | 7.71E-08 | Gm5069        | transcribed_processed_pseudogene | 4.89 | 4.95 | 5.50 | 4.78 | 3.77 | 3.47 | 3.40   | 3.85 |
| Down | ENSMUSG00000091577  | -4.49 | 2.24E-07 | Gm62111       | transcribed_processed_pseudogene | 3.67 | 3.73 | 3.60 | 3.45 | 2.00 | 2.00 | 2.00   | 2.34 |
| Down | ENSMUSG00000109695  | -1.50 | 5.49E-07 | Gm31166       | transcribed_processed_pseudogene | 4.62 | 5.12 | 5.07 | 4.10 | 3.43 | 3.82 | 3.35   | 3.92 |
| Down | ENSMUSG00000112237  | -3.65 | 7.97E-07 | D630033A02Rik | transcribed_processed_pseudogene | 3.25 | 3.97 | 3.36 | 3.69 | 2.37 | 2.00 | 2.00   | 2.44 |
| Down | ENSMUSG00000070282  | -2.09 | 9.74E-07 | 3000002C10Rik | transcribed_processed_pseudogene | 5.68 | 4.77 | 5.34 | 4.76 | 2.66 | 3.56 | 3.13   | 4.28 |
| Up   | ENSMUSG00000086414  | 1.40  | 1.21E-06 | Gm15645       | transcribed_processed_pseudogene | 4.32 | 4.53 | 4.57 | 4.28 | 5.69 | 6.08 | 5.20   | 5.48 |
| Down | ENSMUSG00000101462  | -3.47 | 2.72E-06 | Gm3052        | transcribed_processed_pseudogene | 4.42 | 3.39 | 3.80 | 4.22 | 2.00 | 2.24 | 2.35   | 2.70 |
| Down | ENSMUSG00000092051  | -2.97 | 4.02E-06 | Gm17229       | transcribed_processed_pseudogene | 3.18 | 3.52 | 3.30 | 3.50 | 2.00 | 2.34 | 2.00   | 2.62 |
| Down | ENSMUSG00000108269  | -3.48 | 7.95E-06 | Gm18422       | transcribed_processed_pseudogene | 2.75 | 4.17 | 3.09 | 3.00 | 2.00 | 2.00 | 2.00   | 2.70 |
| Down | ENSMUSG00000107310  | -2.66 | 2.52E-05 | Gm7452        | transcribed_processed_pseudogene | 3.38 | 3.26 | 3.43 | 3.08 | 2.13 | 2.00 | 2.00   | 2.85 |
| Down | ENSMUSG00000101587  | -5.04 | 5.06E-05 | Gm29036       | transcribed_processed_pseudogene | 2.43 | 2.95 | 2.54 | 2.00 | 2.59 | 2.00 | 2.00   | 2.00 |
| Down | ENSMUSG000001015812 | -4.81 | 5.81E-05 | Gm49309       | transcribed_processed_pseudogene | 3.50 | 4.57 | 2.54 | 2.94 | 2.00 | 2.12 | 2.00   | 2.12 |
| Down | ENSMUSG00000088472  | -1.32 | 6.70E-05 | Gm19501       | transcribed_processed_pseudogene | 4.18 | 3.34 | 4.13 | 3.74 | 3.40 | 2.85 | 3.54   | 2.99 |
| Down | ENSMUSG00000059592  | -2.28 | 1.15E-04 | Gm18856       | transcribed_processed_pseudogene | 3.77 | 3.86 | 3.93 | 3.33 | 2.00 | 2.44 | 2.00   | 2.00 |
| Down | ENSMUSG00000115733  | -2.69 | 1.44E-04 | Gm49001       | transcribed_processed_pseudogene | 3.02 | 3.03 | 3.26 | 3.25 | 2.00 | 2.00 | 2.00   | 2.62 |
| Down | ENSMUSG00000108724  | -1.15 | 2.00E-04 | Gm18194       | transcribed_processed_pseudogene | 4.65 | 5.08 | 4.85 | 5.02 | 4.39 | 3.94 | 3.19   | 4.14 |
| Up   | ENSMUSG00000080862  | 3.26  | 4.00E-04 | Gm14523       | transcribed_processed_pseudogene | 2.30 | 2.43 | 2.00 | 2.59 | 2.66 | 4.10 | 4.16   | 4.05 |
| Down | ENSMUSG00000095597  | -1.55 | 4.24E-04 | Gm6472        | transcribed_processed_pseudogene | 3.44 | 3.19 | 3.43 | 3.45 | 2.62 | 2.62 | 2.24   | 2.45 |
| Down | ENSMUSG00000082315  | -1.58 | 6.29E-04 | Gm16523       | transcribed_processed_pseudogene | 3.44 | 3.97 | 3.60 | 3.94 | 2.00 | 2.78 | 2.40   | 2.85 |
| Down | ENSMUSG00000081974  | -1.38 | 7.90E-04 | Gm11960       | transcribed_processed_pseudogene | 3.86 | 3.68 | 4.01 | 3.27 | 2.13 | 3.43 | 2.86   | 2.92 |
| Down | ENSMUSG00000080731  | -4.18 | 1.01E-03 | Rps2-ps9      | transcribed_processed_pseudogene | 2.75 | 2.66 | 2.64 | 2.27 | 2.00 | 2.00 | 2.00   | 2.12 |
| Down | ENSMUSG00000112364  | -5.48 | 1.37E-03 | 4930503E24Rik | transcribed_processed_pseudogene | 2.94 | 2.76 | 3.00 | 3.74 | 2.00 | 2.00 | 2.00   | 2.12 |
| Down | ENSMUSG00000090300  | -4.32 | 1.42E-03 | Gm17119       | transcribed_processed_pseudogene | 2.43 | 3.11 | 2.00 | 2.77 | 2.00 | 2.00 | 2.00   | 2.12 |
| Down | ENSMUSG00000081137  | -1.28 | 1.69E-03 | BC022960      | transcribed_processed_pseudogene | 4.11 | 5.04 | 5.55 | 4.17 | 4.16 | 5.59 | 3.90   | 4.77 |
| Down | ENSMUSG00000083705  | -4.73 | 2.50E-03 | Gm8624        | transcribed_processed_pseudogene | 2.65 | 2.55 | 2.54 | 2.38 | 2.00 | 2.00 | 2.00   | 2.00 |
| Down | ENSMUSG00000102827  | -3.99 | 3.32E-03 | Gm8242        | transcribed_processed_pseudogene | 2.43 | 2.55 | 2.54 | 2.59 | 2.13 | 2.00 | 2.00</ |      |



|      |                     |       |          |               |                                    |       |       |       |       |       |       |       |       |
|------|---------------------|-------|----------|---------------|------------------------------------|-------|-------|-------|-------|-------|-------|-------|-------|
| Down | ENSMUSG00000071265  | -1.33 | 8.82E-43 | 1700086L19Rik | transcribed_unitary_pseudogene     | 8.20  | 8.48  | 8.21  | 8.53  | 7.14  | 7.04  | 6.87  | 7.19  |
| Down | ENSMUSG00000085028  | -2.23 | 2.92E-04 | Sic2a4rg-ps   | transcribed_unitary_pseudogene     | 3.72  | 4.13  | 3.93  | 3.01  | 2.74  | 3.11  | 2.00  | 2.24  |
| Down | ENSMUSG00000074224  | -1.54 | 5.20E-04 | 4932431P20Rik | transcribed_unitary_pseudogene     | 5.28  | 4.95  | 4.97  | 5.58  | 4.03  | 4.30  | 3.13  | 4.08  |
| Down | ENSMUSG00000046958  | -1.29 | 6.01E-03 | 4930432E11Rik | transcribed_unitary_pseudogene     | 5.04  | 5.00  | 5.05  | 5.66  | 3.73  | 4.40  | 3.63  | 4.70  |
| Down | ENSMUSG00000074981  | -1.05 | 6.48E-03 | Dcdc5         | transcribed_unitary_pseudogene     | 5.02  | 5.40  | 5.34  | 5.17  | 3.89  | 4.54  | 3.97  | 4.59  |
| Down | ENSMUSG00000011837  | -4.00 | 9.45E-17 | Gm47135       | transcribed_unprocessed_pseudogene | 3.99  | 4.58  | 4.68  | 4.39  | 2.25  | 2.00  | 2.54  | 2.54  |
| Up   | ENSMUSG00000077412  | -1.00 | 7.22E-16 | 18100140R1Rik | transcribed_unprocessed_pseudogene | 8.34  | 9.19  | 9.00  | 9.03  | 10.32 | 10.19 | 10.09 | 10.09 |
| Down | ENSMUSG00000087150  | -2.75 | 5.44E-11 | BC064078      | transcribed_unprocessed_pseudogene | 5.10  | 5.19  | 4.57  | 4.76  | 2.90  | 2.92  | 3.07  | 3.06  |
| Down | ENSMUSG00000082286  | -1.58 | 5.76E-10 | Pisd-ps1      | transcribed_unprocessed_pseudogene | 5.74  | 6.01  | 6.37  | 6.24  | 4.86  | 3.87  | 4.83  | 4.97  |
| Down | ENSMUSG00000023795  | -1.37 | 9.23E-07 | Pisd-ps2      | transcribed_unprocessed_pseudogene | 4.87  | 5.02  | 5.24  | 5.66  | 3.60  | 4.49  | 3.87  | 4.23  |
| Down | ENSMUSG00000071796  | -1.10 | 3.10E-06 | 6820431F20Rik | transcribed_unprocessed_pseudogene | 5.70  | 6.01  | 5.72  | 5.92  | 5.44  | 4.89  | 4.13  | 4.68  |
| Down | ENSMUSG00000096964  | -3.17 | 6.63E-06 | Gm6345        | transcribed_unprocessed_pseudogene | 3.31  | 3.57  | 3.65  | 4.15  | 2.47  | 2.34  | 2.24  | 2.24  |
| Down | ENSMUSG00000032443  | -1.29 | 3.58E-05 | Zcwpw2        | transcribed_unprocessed_pseudogene | 4.98  | 5.08  | 4.70  | 5.19  | 3.35  | 3.69  | 4.50  | 3.99  |
| Down | ENSMUSG00000010397  | -2.97 | 5.58E-05 | Mug-ps1       | transcribed_unprocessed_pseudogene | 4.07  | 4.27  | 3.80  | 4.53  | 2.25  | 2.44  | 2.86  | 2.54  |
| Down | ENSMUSG00000041596  | -2.52 | 1.85E-04 | Nlrp5-ps      | transcribed_unprocessed_pseudogene | 5.19  | 5.14  | 6.20  | 5.14  | 2.37  | 3.05  | 4.38  | 3.39  |
| Down | ENSMUSG000000102817 | -1.98 | 2.12E-04 | Gm6185        | transcribed_unprocessed_pseudogene | 3.81  | 4.37  | 4.27  | 4.25  | 2.37  | 3.22  | 3.00  | 2.99  |
| Down | ENSMUSG000000107718 | -2.90 | 4.68E-04 | Vmn2r-ps34    | transcribed_unprocessed_pseudogene | 3.99  | 3.97  | 3.60  | 3.78  | 2.66  | 2.24  | 2.35  | 2.44  |
| Down | ENSMUSG000000102059 | -2.77 | 6.47E-04 | Gm20257       | transcribed_unprocessed_pseudogene | 3.44  | 3.78  | 3.93  | 3.45  | 2.13  | 2.12  | 2.00  | 3.06  |
| Down | ENSMUSG000000113817 | -3.55 | 7.25E-04 | Gm21056       | transcribed_unprocessed_pseudogene | 3.91  | 3.57  | 4.20  | 4.70  | 2.00  | 2.53  | 2.45  | 2.44  |
| Down | ENSMUSG000000109032 | -1.62 | 9.64E-04 | Gm7872        | transcribed_unprocessed_pseudogene | 3.56  | 4.17  | 4.34  | 4.05  | 2.82  | 2.12  | 3.35  | 3.44  |
| Down | ENSMUSG00000079356  | -3.41 | 2.20E-03 | Mett4-ps1     | transcribed_unprocessed_pseudogene | 2.94  | 3.46  | 3.93  | 4.09  | 2.13  | 2.13  | 2.24  | 2.54  |
| Down | ENSMUSG000000101639 | -2.65 | 2.43E-03 | Gm8597        | transcribed_unprocessed_pseudogene | 3.72  | 3.46  | 3.65  | 3.82  | 2.74  | 2.00  | 2.00  | 2.78  |
| Down | ENSMUSG000000106369 | -4.18 | 2.53E-03 | Gm43355       | transcribed_unprocessed_pseudogene | 2.43  | 2.16  | 2.64  | 2.27  | 2.00  | 2.00  | 2.00  | 2.00  |
| Down | ENSMUSG000000111194 | -5.49 | 3.02E-03 | Gm47180       | transcribed_unprocessed_pseudogene | 2.43  | 2.30  | 3.09  | 3.21  | 2.00  | 2.00  | 2.00  | 2.00  |
| Down | ENSMUSG00000093610  | -3.08 | 3.19E-03 | Cyp2c53-ps    | transcribed_unprocessed_pseudogene | 3.67  | 3.97  | 3.89  | 3.98  | 2.00  | 2.00  | 2.63  | 2.78  |
| Down | ENSMUSG00000082305  | -1.47 | 3.37E-03 | Gm2420        | transcribed_unprocessed_pseudogene | 3.44  | 3.68  | 3.60  | 4.22  | 2.57  | 2.00  | 3.13  | 3.48  |
| Down | ENSMUSG00000092528  | -1.36 | 4.12E-03 | Nlrp1c-ps     | transcribed_unprocessed_pseudogene | 4.11  | 4.24  | 3.97  | 3.98  | 2.97  | 3.38  | 2.35  | 3.66  |
| Down | ENSMUSG000000114544 | -2.40 | 4.22E-03 | Gm49146       | transcribed_unprocessed_pseudogene | 3.67  | 4.44  | 3.60  | 4.15  | 2.57  | 2.44  | 2.54  | 2.99  |
| Down | ENSMUSG000000108662 | -5.33 | 4.67E-03 | Olf188-ps1    | transcribed_unprocessed_pseudogene | 3.86  | 3.11  | 3.65  | 3.27  | 2.00  | 2.00  | 2.24  | 2.00  |
| Down | ENSMUSG00000085500  | -1.84 | 7.48E-03 | Gm16976       | transcribed_unprocessed_pseudogene | 4.11  | 4.20  | 3.89  | 4.15  | 2.66  | 3.11  | 2.86  | 3.06  |
| Down | ENSMUSG00000097352  | -2.54 | 9.02E-03 | C920009B18Rik | transcribed_unprocessed_pseudogene | 3.50  | 4.47  | 4.30  | 3.94  | 2.00  | 2.70  | 2.35  | 3.23  |
| Down | ENSMUSG00000079455  | -1.42 | 9.97E-03 | Gm16026       | transcribed_unprocessed_pseudogene | 3.91  | 4.27  | 4.52  | 4.19  | 3.11  | 3.17  | 2.71  | 3.81  |
| Down | ENSMUSG000000109913 | -3.30 | 4.81E-08 | Gm30694       | unitary_pseudogene                 | 3.18  | 3.73  | 4.37  | 3.85  | 2.00  | 2.00  | 2.44  | 2.44  |
| Down | ENSMUSG000000986162 | -2.09 | 2.61E-03 | Gm16342       | unitary_pseudogene                 | 3.50  | 2.95  | 3.49  | 2.59  | 2.00  | 2.12  | 2.62  | 2.62  |
| Down | ENSMUSG00000067736  | -6.22 | 2.33E-47 | Gm10222       | unprocessed_pseudogene             | 8.47  | 8.99  | 8.75  | 9.20  | 3.73  | 2.34  | 3.30  | 3.70  |
| Down | ENSMUSG00000083563  | -4.45 | 4.67E-34 | Gm13340       | unprocessed_pseudogene             | 5.17  | 5.78  | 5.65  | 5.88  | 3.23  | 2.34  | 2.24  | 2.44  |
| Down | ENSMUSG000000101939 | -5.81 | 1.53E-30 | Gm28438       | unprocessed_pseudogene             | 10.22 | 10.58 | 10.46 | 10.83 | 4.92  | 4.70  | 5.26  | 4.77  |
| Down | ENSMUSG000000101111 | -7.35 | 3.65E-28 | Gm28437       | unprocessed_pseudogene             | 6.84  | 7.23  | 7.21  | 7.69  | 2.82  | 2.00  | 2.00  | 2.24  |
| Down | ENSMUSG000000100131 | -5.90 | 9.87E-14 | Gm28439       | unprocessed_pseudogene             | 4.51  | 4.56  | 4.70  | 4.96  | 2.25  | 2.12  | 2.00  | 2.12  |
| Down | ENSMUSG000000100862 | -7.12 | 4.96E-11 | Gm10925       | unprocessed_pseudogene             | 4.03  | 4.05  | 4.27  | 4.65  | 2.13  | 2.00  | 2.00  | 2.00  |
| Down | ENSMUSG000000102070 | -6.94 | 2.39E-10 | Gm28661       | unprocessed_pseudogene             | 3.44  | 3.57  | 3.49  | 3.90  | 2.00  | 2.00  | 2.00  | 2.00  |
| Down | ENSMUSG000000101249 | -3.84 | 9.80E-09 | Gm29216       | unprocessed_pseudogene             | 3.81  | 3.11  | 3.43  | 3.78  | 2.00  | 2.00  | 2.62  | 2.62  |
| Down | ENSMUSG00000082884  | -5.88 | 2.64E-07 | Gm13339       | unprocessed_pseudogene             | 2.94  | 2.76  | 3.01  | 3.21  | 2.00  | 2.00  | 2.00  | 2.00  |
| Down | ENSMUSG00000083863  | -2.97 | 2.89E-07 | Gm13341       | unprocessed_pseudogene             | 3.02  | 3.73  | 3.97  | 3.98  | 2.00  | 2.92  | 2.00  | 2.34  |
| Down | ENSMUSG00000089818  | -3.45 | 8.82E-07 | Gm15950       | unprocessed_pseudogene             | 3.02  | 3.52  | 3.65  | 3.55  | 2.00  | 2.34  | 2.24  | 2.24  |
| Down | ENSMUSG00000087153  | -1.06 | 2.38E-06 | Gm6463        | unprocessed_pseudogene             | 5.42  | 5.58  | 5.64  | 5.41  | 4.62  | 4.64  | 4.07  | 4.70  |
| Down | ENSMUSG000000110649 | -1.88 | 1.06E-05 | Gm40466       | unprocessed_pseudogene             | 4.15  | 4.20  | 4.09  | 4.37  | 3.11  | 3.17  | 3.17  | 3.17  |
| Down | ENSMUSG000000114610 | -4.87 | 2.88E-04 | Cyp2c52-ps    | unprocessed_pseudogene             | 3.02  | 2.86  | 3.36  | 3.55  | 2.13  | 2.00  | 2.00  | 2.12  |
| Down | ENSMUSG00000099871  | -5.28 | 8.79E-04 | Gm21742       | unprocessed_pseudogene             | 3.77  | 2.00  | 2.29  | 2.00  | 2.00  | 2.00  | 2.00  | 2.00  |
| Down | ENSMUSG00000093426  | -4.83 | 1.38E-03 | Vmn2r-ps123   | unprocessed_pseudogene             | 3.56  | 3.46  | 3.49  | 3.69  | 2.00  | 2.00  | 2.00  | 2.34  |
| Down | ENSMUSG000000102493 | -1.93 | 1.55E-03 | Gm8010        | unprocessed_pseudogene             | 3.38  | 4.09  | 3.43  | 3.50  | 2.25  | 2.34  | 2.93  | 2.85  |
| Down | ENSMUSG00000080153  | -3.96 | 2.57E-03 | Gm12260       | unprocessed_pseudogene             | 2.75  | 2.16  | 3.01  | 3.01  | 2.00  | 2.00  | 2.00  | 2.24  |
| Down | ENSMUSG00000090256  | -1.52 | 3.01E-03 | Alms1-ps1     | unprocessed_pseudogene             | 4.22  | 4.17  | 3.97  | 4.28  | 3.40  | 3.56  | 2.35  | 2.99  |
| Down | ENSMUSG000000105082 | -3.43 | 4.63E-03 | Aqp10-ps      | unprocessed_pseudogene             | 2.54  | 2.95  | 2.29  | 3.21  | 2.00  | 2.24  | 2.00  | 2.12  |
| Down | ENSMUSG00000073902  | -2.79 | 5.31E-03 | Gm1966        | unprocessed_pseudogene             | 4.48  | 4.61  | 3.43  | 4.74  | 2.82  | 2.34  | 2.00  | 3.29  |
| Down | ENSMUSG000000103601 | -4.21 | 5.93E-03 | Gm18150       | unprocessed_pseudogene             | 2.30  | 2.86  | 2.15  | 2.14  | 2.00  | 2.00  | 2.00  | 2.00  |
| Down | ENSMUSG000000109750 | -4.86 | 8.59E-03 | Hmgb1-rs17    | unprocessed_pseudogene             | 2.54  | 3.19  | 2.74  | 2.86  | 2.00  | 2.00  | 2.12  | 2.12  |
| Down | ENSMUSG00000089927  | -3.36 | 8.78E-03 | Gm16539       | unprocessed_pseudogene             | 2.30  | 2.76  | 2.42  | 2.69  | 2.00  | 2.00  | 2.00  | 2.24  |
| Down | ENSMUSG00000080701  | -4.24 | 9.07E-03 | Gm12340       | unprocessed_pseudogene             | 2.43  | 2.16  | 3.09  | 2.59  | 2.00  | 2.00  | 2.12  | 2.12  |
| Down | ENSMUSG000000115802 | -3.80 | 9.21E-03 | Vmn1r-ps136   | unprocessed_pseudogene             | 2.65  | 2.55  | 2.00  | 2.59  | 2.00  | 2.00  | 2.12  | 2.12  |
| Down | ENSMUSG00000091277  | -1.89 | 9.45E-03 | Gm1818        | unprocessed_pseudogene             | 2.65  | 3.23  | 2.84  | 3.33  | 2.65  | 2.34  | 2.35  | 2.54  |
